# Supplementary material for: Identification of m7G Methylation-Related miRNA Signature Associated with Survival and Immune Microenvironment Regulation in Uterine Corpus Endometrial Carcinoma
Source: PubMed Central journal article supplement (PMC9713471; doi:10.1155/2022/8776678), 2022-11-23
Supplement: 8776678.f1.pdf [file 8776678.f1.pdf]

---

Gene

---

METTL1  
WDR4  
NSUN2  
DCP2  
DCPS  
NUDT10  
NUDT11  
NUDT16  
NUDT3  
NUDT4  
AGO2  
CYFIP1  
EIF4E  
EIF4E1B  
EIF4E2  
EIF4E3  
GEMIN5  
LARP1  
NCBP1  
NCBP2  
C17orf85  
EIF3D  
EIF4A1  
EIF4G3  
IFIT5  
LSM1  
NCBP2L  
SNUPN

---
