# Supplementary material for: Identification of m7G Methylation‐Related miRNA Signature Associated with Survival and Immune Microenvironment Regulation in Uterine Corpus Endometrial Carcinoma
Source: Hindawi journal article supplement (doi:10.1155/2022/8776678), 2022-01-01
Supplement: f2 [file 8776678.f2.pdf]

| Gene | miRNA            |
|------|------------------|
| AGO2 | hsa-miR-6715b-3p |
| AGO2 | hsa-miR-3667-5p  |
| AGO2 | hsa-miR-7075-3p  |
| AGO2 | hsa-miR-7666-3p  |
| AGO2 | hsa-miR-7686-3p  |
| AGO2 | hsa-miR-6505-3p  |
| AGO2 | hsa-miR-291      |
| AGO2 | hsa-miR-1777     |
| AGO2 | hsa-miR-2369     |
| AGO2 | hsa-miR-548ac    |
| AGO2 | hsa-miR-205-5p   |
| AGO2 | hsa-miR-6980-5p  |
| AGO2 | hsa-miR-510-5p   |
| AGO2 | hsa-miR-667-3p   |
| AGO2 | hsa-miR-487b-5p  |
| AGO2 | hsa-miR-7276-5p  |
| AGO2 | hsa-miR-107-3p   |
| AGO2 | hsa-miR-7033-5p  |
| AGO2 | hsa-miR-5001-3p  |
| AGO2 | hsa-miR-1704     |
| AGO2 | hsa-miR-4277     |
| AGO2 | hsa-miR-4275     |
| AGO2 | hsa-miR-7069-3p  |
| AGO2 | hsa-miR-2352     |
| AGO2 | hsa-miR-2370-5p  |
| AGO2 | hsa-miR-3596d    |
| AGO2 | hsa-miR-7263-3p  |
| AGO2 | hsa-miR-460-5p   |
| AGO2 | hsa-miR-30ad-3p  |
| AGO2 | hsa-miR-6905-5p  |
| AGO2 | hsa-miR-6845-5p  |
| AGO2 | hsa-miR-17-3p    |
| AGO2 | hsa-miR-573      |
| AGO2 | hsa-miR-23-3p    |
| AGO2 | hsa-miR-6356     |
| AGO2 | hsa-miR-6777-3p  |
| AGO2 | hsa-miR-153      |
| AGO2 | hsa-miR-7468-3p  |
| AGO2 | hsa-miR-7457-5p  |
| AGO2 | hsa-miR-4472     |
| AGO2 | hsa-miR-8097     |
| AGO2 | hsa-miR-939-5p   |
| AGO2 | hsa-miR-4732-3p  |
| AGO2 | hsa-miR-467-3p   |
| AGO2 | hsa-miR-7285-5p  |

|      |                  |
|------|------------------|
| AGO2 | hsa-miR-1906     |
| AGO2 | hsa-miR-6974-3p  |
| AGO2 | hsa-miR-290a-5p  |
| AGO2 | hsa-miR-6506-5p  |
| AGO2 | hsa-miR-1273h-5p |
| AGO2 | hsa-miR-7264-5p  |
| AGO2 | hsa-miR-7398k-5p |
| AGO2 | hsa-miR-371-3p   |
| AGO2 | hsa-miR-7110-3p  |
| AGO2 | hsa-miR-6756-5p  |
| AGO2 | hsa-miR-136-3p   |
| AGO2 | hsa-miR-7050-5p  |
| AGO2 | hsa-miR-6672-3p  |
| AGO2 | hsa-miR-1589     |
| AGO2 | hsa-miR-4426     |
| AGO2 | hsa-miR-7076-5p  |
| AGO2 | hsa-miR-4531     |
| AGO2 | hsa-miR-1550-3p  |
| AGO2 | hsa-miR-4632-3p  |
| AGO2 | hsa-miR-7006-5p  |
| AGO2 | hsa-miR-6517     |
| AGO2 | hsa-miR-714      |
| AGO2 | hsa-miR-5125-5p  |
| AGO2 | hsa-miR-599      |
| AGO2 | hsa-miR-5591-5p  |
| AGO2 | hsa-miR-3075     |
| AGO2 | hsa-miR-7063-3p  |
| AGO2 | hsa-miR-5787     |
| AGO2 | hsa-miR-3692-5p  |
| AGO2 | hsa-miR-7386b-3p |
| AGO2 | hsa-miR-6909-3p  |
| AGO2 | hsa-miR-889-3p   |
| AGO2 | hsa-miR-1297     |
| AGO2 | hsa-miR-7089-3p  |
| AGO2 | hsa-miR-1942     |
| AGO2 | hsa-miR-8908b    |
| AGO2 | hsa-miR-642b-5p  |
| AGO2 | hsa-miR-324-3p   |
| AGO2 | hsa-miR-6744-3p  |
| AGO2 | hsa-miR-4469     |
| AGO2 | hsa-miR-2278     |
| AGO2 | hsa-miR-16-1-3p  |
| AGO2 | hsa-miR-7085-5p  |
| AGO2 | hsa-miR-3622a-3p |
| AGO2 | hsa-miR-19a-5p   |
| AGO2 | hsa-miR-7321-5p  |

|      |                  |
|------|------------------|
| AGO2 | hsa-miR-7390-3p  |
| AGO2 | hsa-miR-873-3p   |
| AGO2 | hsa-miR-1772-5p  |
| AGO2 | hsa-miR-4668-5p  |
| AGO2 | hsa-miR-153-5p   |
| AGO2 | hsa-miR-5585-5p  |
| AGO2 | hsa-miR-495-3p   |
| AGO2 | hsa-miR-4438     |
| AGO2 | hsa-miR-6847-5p  |
| AGO2 | hsa-miR-7183-3p  |
| AGO2 | hsa-miR-1200     |
| AGO2 | hsa-miR-7220-5p  |
| AGO2 | hsa-miR-7064-5p  |
| AGO2 | hsa-miR-219a-5p  |
| AGO2 | hsa-miR-2284l    |
| AGO2 | hsa-miR-2430     |
| AGO2 | hsa-miR-3594-5p  |
| AGO2 | hsa-miR-4667-5p  |
| AGO2 | hsa-miR-540-5p   |
| AGO2 | hsa-miR-7397-3p  |
| AGO2 | hsa-miR-4264     |
| AGO2 | hsa-let-7g-3p    |
| AGO2 | hsa-miR-4632-5p  |
| AGO2 | hsa-miR-6764-5p  |
| AGO2 | hsa-miR-545-5p   |
| AGO2 | hsa-miR-880-5p   |
| AGO2 | hsa-miR-365a-5p  |
| AGO2 | hsa-miR-190b-3p  |
| AGO2 | hsa-miR-31-5p    |
| AGO2 | hsa-miR-218-3p   |
| AGO2 | hsa-miR-6733-5p  |
| AGO2 | hsa-miR-2052     |
| AGO2 | hsa-miR-641      |
| AGO2 | hsa-miR-6895-5p  |
| AGO2 | hsa-miR-1271-3p  |
| AGO2 | hsa-miR-2424     |
| AGO2 | hsa-miR-1230     |
| AGO2 | hsa-miR-881-5p   |
| AGO2 | hsa-miR-140-5p   |
| AGO2 | hsa-miR-6965-5p  |
| AGO2 | hsa-miR-140-3p.1 |
| AGO2 | hsa-miR-4530     |
| AGO2 | hsa-miR-6354     |
| AGO2 | hsa-miR-3080-5p  |
| AGO2 | hsa-miR-4652-5p  |
| AGO2 | hsa-miR-1815     |

|      |                   |
|------|-------------------|
| AGO2 | hsa-miR-142-3p.1  |
| AGO2 | hsa-miR-9768-5p   |
| AGO2 | hsa-miR-6873-3p   |
| AGO2 | hsa-miR-6960-5p   |
| AGO2 | hsa-miR-3070-2-3p |
| AGO2 | hsa-miR-8061      |
| AGO2 | hsa-miR-758-3p    |
| AGO2 | hsa-miR-2472      |
| AGO2 | hsa-miR-6332      |
| AGO2 | hsa-miR-525-5p    |
| AGO2 | hsa-miR-34-5p     |
| AGO2 | hsa-miR-5699-3p   |
| AGO2 | hsa-miR-942-3p    |
| AGO2 | hsa-miR-4523      |
| AGO2 | hsa-miR-1650      |
| AGO2 | hsa-miR-7664-5p   |
| AGO2 | hsa-miR-1184      |
| AGO2 | hsa-miR-7169-5p   |
| AGO2 | hsa-miR-1324      |
| AGO2 | hsa-miR-292a-5p   |
| AGO2 | hsa-miR-7156-5p   |
| AGO2 | hsa-miR-7861      |
| AGO2 | hsa-miR-609       |
| AGO2 | hsa-miR-513       |
| AGO2 | hsa-miR-1662      |
| AGO2 | hsa-miR-7649-3p   |
| AGO2 | hsa-miR-151-3p    |
| AGO2 | hsa-miR-3473      |
| AGO2 | hsa-miR-1736-5p   |
| AGO2 | hsa-miR-580-5p    |
| AGO2 | hsa-miR-7232-3p   |
| AGO2 | hsa-miR-509-3-5p  |
| AGO2 | hsa-miR-7386l-5p  |
| AGO2 | hsa-miR-449c-5p   |
| AGO2 | hsa-miR-505-3p    |
| AGO2 | hsa-miR-5617-5p   |
| AGO2 | hsa-miR-6679-5p   |
| AGO2 | hsa-miR-181a-5p   |
| AGO2 | hsa-miR-4265      |
| AGO2 | hsa-miR-6947-5p   |
| AGO2 | hsa-miR-548j-5p   |
| AGO2 | hsa-miR-577       |
| AGO2 | hsa-miR-6973b-3p  |
| AGO2 | hsa-miR-337-3p    |
| AGO2 | hsa-miR-7578      |
| AGO2 | hsa-miR-6985-5p   |

|      |                  |
|------|------------------|
| AGO2 | hsa-miR-7275-3p  |
| AGO2 | hsa-miR-556-3p   |
| AGO2 | hsa-miR-6980-3p  |
| AGO2 | hsa-miR-6598-5p  |
| AGO2 | hsa-miR-650      |
| AGO2 | hsa-miR-1759-3p  |
| AGO2 | hsa-miR-1226-3p  |
| AGO2 | hsa-miR-6922-3p  |
| AGO2 | hsa-miR-1207-3p  |
| AGO2 | hsa-miR-373-3p   |
| AGO2 | hsa-miR-6850-3p  |
| AGO2 | hsa-miR-6885-5p  |
| AGO2 | hsa-miR-200a-3p  |
| AGO2 | hsa-miR-17-5p    |
| AGO2 | hsa-miR-4688     |
| AGO2 | hsa-miR-618      |
| AGO2 | hsa-miR-6628-3p  |
| AGO2 | hsa-miR-7176-5p  |
| AGO2 | hsa-miR-4680-3p  |
| AGO2 | hsa-miR-520b     |
| AGO2 | hsa-miR-3173-5p  |
| AGO2 | hsa-miR-4289     |
| AGO2 | hsa-miR-2415-3p  |
| AGO2 | hsa-miR-331-3p   |
| AGO2 | hsa-miR-1941-3p  |
| AGO2 | hsa-miR-8801     |
| AGO2 | hsa-miR-4725-5p  |
| AGO2 | hsa-miR-1743     |
| AGO2 | hsa-miR-4738-5p  |
| AGO2 | hsa-miR-2345     |
| AGO2 | hsa-miR-96-5p    |
| AGO2 | hsa-miR-548ak    |
| AGO2 | hsa-miR-483-5p   |
| AGO2 | hsa-miR-518c-5p  |
| AGO2 | hsa-miR-7000-3p  |
| AGO2 | hsa-miR-202-5p   |
| AGO2 | hsa-miR-1788-3p  |
| AGO2 | hsa-miR-6128     |
| AGO2 | hsa-miR-2322-5p  |
| AGO2 | hsa-miR-696      |
| AGO2 | hsa-miR-6950-3p  |
| AGO2 | hsa-miR-344i     |
| AGO2 | hsa-miR-7463-5p  |
| AGO2 | hsa-miR-7662-5p  |
| AGO2 | hsa-miR-7658-3p  |
| AGO2 | hsa-miR-4659b-3p |

|      |                   |
|------|-------------------|
| AGO2 | hsa-miR-7043-5p   |
| AGO2 | hsa-miR-548o-5p   |
| AGO2 | hsa-miR-4633-3p   |
| AGO2 | hsa-miR-6968-3p   |
| AGO2 | hsa-miR-872-5p    |
| AGO2 | hsa-miR-382-5p    |
| AGO2 | hsa-miR-520-3p    |
| AGO2 | hsa-miR-196a-1-3p |
| AGO2 | hsa-miR-380-3p    |
| AGO2 | hsa-miR-136-5p    |
| AGO2 | hsa-miR-344g-3p   |
| AGO2 | hsa-miR-6129      |
| AGO2 | hsa-miR-7041-3p   |
| AGO2 | hsa-miR-1585      |
| AGO2 | hsa-miR-208b-3p   |
| AGO2 | hsa-miR-466h-3p   |
| AGO2 | hsa-miR-4714-3p   |
| AGO2 | hsa-miR-6751-3p   |
| AGO2 | hsa-miR-548ab     |
| AGO2 | hsa-miR-7084-5p   |
| AGO2 | hsa-miR-6910-5p   |
| AGO2 | hsa-miR-7051-5p   |
| AGO2 | hsa-miR-4752      |
| AGO2 | hsa-miR-499a-3p   |
| AGO2 | hsa-miR-508-3p    |
| AGO2 | hsa-miR-7360-5p   |
| AGO2 | hsa-miR-885-5p    |
| AGO2 | hsa-miR-1781-5p   |
| AGO2 | hsa-miR-330-3p.1  |
| AGO2 | hsa-miR-7178-3p   |
| AGO2 | hsa-miR-193a      |
| AGO2 | hsa-miR-7040-3p   |
| AGO2 | hsa-miR-3158-5p   |
| AGO2 | hsa-miR-6846-5p   |
| AGO2 | hsa-miR-346       |
| AGO2 | hsa-miR-6641-5p   |
| AGO2 | hsa-miR-106a-5p   |
| AGO2 | hsa-miR-5622-5p   |
| AGO2 | hsa-miR-208a-3p   |
| AGO2 | hsa-miR-6756-3p   |
| AGO2 | hsa-miR-7172-5p   |
| AGO2 | hsa-miR-4417      |
| AGO2 | hsa-miR-1695      |
| AGO2 | hsa-miR-3063-3p   |
| AGO2 | hsa-miR-548b-3p   |
| AGO2 | hsa-miR-486-5p    |

|      |                  |
|------|------------------|
| AGO2 | hsa-miR-7160-3p  |
| AGO2 | hsa-miR-155-3p   |
| AGO2 | hsa-miR-6576-3p  |
| AGO2 | hsa-miR-6913-5p  |
| AGO2 | hsa-miR-8908e    |
| AGO2 | hsa-miR-7258-5p  |
| AGO2 | hsa-miR-513b-3p  |
| AGO2 | hsa-miR-2454-3p  |
| AGO2 | hsa-miR-7185-3p  |
| AGO2 | hsa-miR-450b     |
| AGO2 | hsa-miR-873b     |
| AGO2 | hsa-miR-3551-5p  |
| AGO2 | hsa-miR-2355-5p  |
| AGO2 | hsa-miR-365a-3p  |
| AGO2 | hsa-miR-207      |
| AGO2 | hsa-miR-543      |
| AGO2 | hsa-miR-8119     |
| AGO2 | hsa-miR-1612     |
| AGO2 | hsa-miR-128-1-5p |
| AGO2 | hsa-miR-590-5p   |
| AGO2 | hsa-miR-3561-5p  |
| AGO2 | hsa-miR-4271     |
| AGO2 | hsa-miR-548s     |
| AGO2 | hsa-miR-7156-3p  |
| AGO2 | hsa-miR-6829-3p  |
| AGO2 | hsa-miR-4795-5p  |
| AGO2 | hsa-miR-4330     |
| AGO2 | hsa-miR-4723-3p  |
| AGO2 | hsa-miR-1270     |
| AGO2 | hsa-miR-6564-3p  |
| AGO2 | hsa-miR-7398r-3p |
| AGO2 | hsa-miR-1262-5p  |
| AGO2 | hsa-miR-7275-5p  |
| AGO2 | hsa-miR-548ay-3p |
| AGO2 | hsa-miR-4697-5p  |
| AGO2 | hsa-miR-7051-3p  |
| AGO2 | hsa-miR-3593-5p  |
| AGO2 | hsa-miR-1207-5p  |
| AGO2 | hsa-miR-1288-5p  |
| AGO2 | hsa-miR-1277-5p  |
| AGO2 | hsa-miR-4495     |
| AGO2 | hsa-miR-7118-5p  |
| AGO2 | hsa-miR-7346-5p  |
| AGO2 | hsa-miR-4529-3p  |
| AGO2 | hsa-miR-2130     |
| AGO2 | hsa-miR-548ao-5p |

|      |                   |
|------|-------------------|
| AGO2 | hsa-miR-1247-5p   |
| AGO2 | hsa-miR-3571      |
| AGO2 | hsa-miR-2899      |
| AGO2 | hsa-miR-7022-5p   |
| AGO2 | hsa-miR-7667-5p   |
| AGO2 | hsa-miR-7664-3p   |
| AGO2 | hsa-miR-1684-3p   |
| AGO2 | hsa-miR-5691      |
| AGO2 | hsa-miR-101-2-5p  |
| AGO2 | hsa-miR-1273e     |
| AGO2 | hsa-miR-6809-5p   |
| AGO2 | hsa-miR-1715-5p   |
| AGO2 | hsa-miR-7374-5p   |
| AGO2 | hsa-miR-15-5p     |
| AGO2 | hsa-miR-2329-3p   |
| AGO2 | hsa-miR-6690-5p   |
| AGO2 | hsa-miR-133-3p    |
| AGO2 | hsa-miR-7334-3p   |
| AGO2 | hsa-miR-7017-5p   |
| AGO2 | hsa-miR-5571-5p   |
| AGO2 | hsa-miR-495-3p    |
| AGO2 | hsa-miR-922       |
| AGO2 | hsa-miR-7398m-3p  |
| AGO2 | hsa-miR-2127      |
| AGO2 | hsa-miR-7336-5p   |
| AGO2 | hsa-miR-7386k-3p  |
| AGO2 | hsa-miR-1301      |
| AGO2 | hsa-miR-1468-3p   |
| AGO2 | hsa-miR-297-5p    |
| AGO2 | hsa-miR-181a-1-3p |
| AGO2 | hsa-miR-7257-3p   |
| AGO2 | hsa-miR-369-3p    |
| AGO2 | hsa-let-7afk-3p   |
| AGO2 | hsa-miR-379-5p    |
| AGO2 | hsa-miR-3549      |
| AGO2 | hsa-miR-138-5p    |
| AGO2 | hsa-miR-2409      |
| AGO2 | hsa-miR-105-5p    |
| AGO2 | hsa-miR-8867      |
| AGO2 | hsa-miR-561-3p    |
| AGO2 | hsa-miR-129b-5p   |
| AGO2 | hsa-miR-6524      |
| AGO2 | hsa-miR-5571-3p   |
| AGO2 | hsa-miR-3944-5p   |
| AGO2 | hsa-miR-7216-5p   |
| AGO2 | hsa-miR-376a-2-5p |



|      |                   |
|------|-------------------|
| AGO2 | hsa-miR-8901      |
| AGO2 | hsa-miR-550b-3p   |
| AGO2 | hsa-miR-7319-3p   |
| AGO2 | hsa-miR-500a-5p   |
| AGO2 | hsa-miR-184-3p    |
| AGO2 | hsa-miR-589-5p    |
| AGO2 | hsa-miR-3173-3p   |
| AGO2 | hsa-let-7abf-3p   |
| AGO2 | hsa-miR-194-5p    |
| AGO2 | hsa-miR-351-5p    |
| AGO2 | hsa-miR-1805-3p   |
| AGO2 | hsa-miR-6981-5p   |
| AGO2 | hsa-miR-6902-5p   |
| AGO2 | hsa-miR-362-5p    |
| AGO2 | hsa-miR-8906      |
| AGO2 | hsa-miR-3157-5p   |
| AGO2 | hsa-miR-8104      |
| AGO2 | hsa-miR-1982-5p   |
| AGO2 | hsa-miR-5046      |
| AGO2 | hsa-miR-6376      |
| AGO2 | hsa-miR-1798-3p   |
| AGO2 | hsa-miR-2392      |
| AGO2 | hsa-miR-3470b     |
| AGO2 | hsa-miR-762       |
| AGO2 | hsa-miR-6762-5p   |
| AGO2 | hsa-miR-507       |
| AGO2 | hsa-miR-6803-5p   |
| AGO2 | hsa-miR-193-5p    |
| AGO2 | hsa-miR-6990-5p   |
| AGO2 | hsa-miR-3577-3p   |
| AGO2 | hsa-miR-3087-5p   |
| AGO2 | hsa-miR-7348-3p   |
| AGO2 | hsa-miR-8092      |
| AGO2 | hsa-miR-320-3p    |
| AGO2 | hsa-miR-520f-3p   |
| AGO2 | hsa-miR-5114      |
| AGO2 | hsa-miR-1467-3p   |
| AGO2 | hsa-miR-139-3p    |
| AGO2 | hsa-miR-3084bc-5p |
| AGO2 | hsa-miR-7655-3p   |
| AGO2 | hsa-miR-140-5p    |
| AGO2 | hsa-miR-7344-5p   |
| AGO2 | hsa-miR-8095      |
| AGO2 | hsa-miR-6843-3p   |
| AGO2 | hsa-miR-1304-3p   |
| AGO2 | hsa-miR-8102      |

|      |                  |
|------|------------------|
| AGO2 | hsa-miR-4322     |
| AGO2 | hsa-miR-7157-5p  |
| AGO2 | hsa-miR-583      |
| AGO2 | hsa-miR-367-5p   |
| AGO2 | hsa-miR-7078-5p  |
| AGO2 | hsa-miR-6930-3p  |
| AGO2 | hsa-miR-592      |
| AGO2 | hsa-miR-33a-3p   |
| AGO2 | hsa-miR-7052-5p  |
| AGO2 | hsa-miR-5129-5p  |
| AGO2 | hsa-miR-540-3p   |
| AGO2 | hsa-miR-141-5p   |
| AGO2 | hsa-miR-548ax    |
| AGO2 | hsa-miR-7182-3p  |
| AGO2 | hsa-miR-2385-3p  |
| AGO2 | hsa-miR-6605-5p  |
| AGO2 | hsa-miR-2284-3p  |
| AGO2 | hsa-miR-4297     |
| AGO2 | hsa-miR-548p     |
| AGO2 | hsa-miR-7081-5p  |
| AGO2 | hsa-miR-9b-3p    |
| AGO2 | hsa-miR-2285h    |
| AGO2 | hsa-miR-1266     |
| AGO2 | hsa-miR-4498     |
| AGO2 | hsa-miR-548ap-3p |
| AGO2 | hsa-miR-6528     |
| AGO2 | hsa-miR-7218-3p  |
| AGO2 | hsa-miR-7300-5p  |
| AGO2 | hsa-miR-508-5p   |
| AGO2 | hsa-miR-7164-5p  |
| AGO2 | hsa-miR-602      |
| AGO2 | hsa-miR-4713-5p  |
| AGO2 | hsa-miR-200-3p   |
| AGO2 | hsa-miR-6409     |
| AGO2 | hsa-miR-760-3p   |
| AGO2 | hsa-miR-2455     |
| AGO2 | hsa-miR-3972     |
| AGO2 | hsa-miR-708-5p   |
| AGO2 | hsa-miR-1931     |
| AGO2 | hsa-miR-8085     |
| AGO2 | hsa-miR-502a     |
| AGO2 | hsa-miR-7655-5p  |
| AGO2 | hsa-miR-6890-3p  |
| AGO2 | hsa-miR-767-3p   |
| AGO2 | hsa-miR-6722-3p  |
| AGO2 | hsa-miR-2285u    |

|      |                  |
|------|------------------|
| AGO2 | hsa-miR-2325b    |
| AGO2 | hsa-miR-7677-3p  |
| AGO2 | hsa-miR-16-2-3p  |
| AGO2 | hsa-miR-92       |
| AGO2 | hsa-miR-208a-5p  |
| AGO2 | hsa-miR-3170     |
| AGO2 | hsa-miR-182-3p   |
| AGO2 | hsa-miR-103b     |
| AGO2 | hsa-miR-4718     |
| AGO2 | hsa-miR-631      |
| AGO2 | hsa-miR-200a-3p  |
| AGO2 | hsa-miR-7189-5p  |
| AGO2 | hsa-miR-4695-5p  |
| AGO2 | hsa-miR-7864     |
| AGO2 | hsa-miR-622      |
| AGO2 | hsa-miR-5580-3p  |
| AGO2 | hsa-miR-3078-3p  |
| AGO2 | hsa-miR-199-1-5p |
| AGO2 | hsa-miR-571      |
| AGO2 | hsa-miR-2341     |
| AGO2 | hsa-miR-20-5p    |
| AGO2 | hsa-miR-34c-3p   |
| AGO2 | hsa-miR-294-5p   |
| AGO2 | hsa-miR-4766-3p  |
| AGO2 | hsa-miR-499b-3p  |
| AGO2 | hsa-miR-624-3p   |
| AGO2 | hsa-miR-212-5p   |
| AGO2 | hsa-miR-802-5p   |
| AGO2 | hsa-miR-3589     |
| AGO2 | hsa-miR-193-3p   |
| AGO2 | hsa-miR-1460     |
| AGO2 | hsa-miR-2276-5p  |
| AGO2 | hsa-miR-1545c-5p |
| AGO2 | hsa-miR-7702     |
| AGO2 | hsa-miR-3612     |
| AGO2 | hsa-miR-6393     |
| AGO2 | hsa-miR-4538     |
| AGO2 | hsa-miR-6940-5p  |
| AGO2 | hsa-miR-1245-5p  |
| AGO2 | hsa-miR-3934-3p  |
| AGO2 | hsa-miR-1290     |
| AGO2 | hsa-miR-4505     |
| AGO2 | hsa-miR-5189-5p  |
| AGO2 | hsa-miR-6735-5p  |
| AGO2 | hsa-miR-2461-3p  |
| AGO2 | hsa-miR-7299-3p  |

|      |                  |
|------|------------------|
| AGO2 | hsa-miR-6816-3p  |
| AGO2 | hsa-miR-30-5p    |
| AGO2 | hsa-miR-126-3p.1 |
| AGO2 | hsa-miR-148      |
| AGO2 | hsa-miR-7026-5p  |
| AGO2 | hsa-miR-463-3p   |
| AGO2 | hsa-miR-5572     |
| AGO2 | hsa-miR-2284w    |
| AGO2 | hsa-miR-769      |
| AGO2 | hsa-miR-7443-3p  |
| AGO2 | hsa-miR-5197-3p  |
| AGO2 | hsa-miR-873-5p   |
| AGO2 | hsa-miR-7330-5p  |
| AGO2 | hsa-miR-497-3p   |
| AGO2 | hsa-miR-7291-3p  |
| AGO2 | hsa-miR-423-3p   |
| AGO2 | hsa-miR-644a     |
| AGO2 | hsa-miR-873-5p.2 |
| AGO2 | hsa-miR-654-5p   |
| AGO2 | hsa-miR-1911-5p  |
| AGO2 | hsa-miR-22-5p    |
| AGO2 | hsa-miR-454-3p   |
| AGO2 | hsa-miR-8820     |
| AGO2 | hsa-miR-30e-5p   |
| AGO2 | hsa-miR-349      |
| AGO2 | hsa-miR-4715-3p  |
| AGO2 | hsa-miR-183-5p.2 |
| AGO2 | hsa-miR-4716     |
| AGO2 | hsa-miR-1617     |
| AGO2 | hsa-miR-6889-5p  |
| AGO2 | hsa-miR-129-5p   |
| AGO2 | hsa-miR-3591-3p  |
| AGO2 | hsa-miR-2285af   |
| AGO2 | hsa-miR-344f-5p  |
| AGO2 | hsa-miR-542-5p   |
| AGO2 | hsa-miR-471-3p   |
| AGO2 | hsa-miR-4744     |
| AGO2 | hsa-miR-1967     |
| AGO2 | hsa-miR-6755-5p  |
| AGO2 | hsa-miR-548aa    |
| AGO2 | hsa-miR-3100-5p  |
| AGO2 | hsa-miR-363-3p   |
| AGO2 | hsa-miR-7161-5p  |
| AGO2 | hsa-miR-3584-5p  |
| AGO2 | hsa-miR-7b-3p    |
| AGO2 | hsa-miR-4786-3p  |

|      |                  |
|------|------------------|
| AGO2 | hsa-miR-369-5p   |
| AGO2 | hsa-miR-7653-5p  |
| AGO2 | hsa-miR-6590-3p  |
| AGO2 | hsa-miR-383-3p   |
| AGO2 | hsa-miR-6795-5p  |
| AGO2 | hsa-miR-660-5p   |
| AGO2 | hsa-miR-196a-3p  |
| AGO2 | hsa-miR-3663-3p  |
| AGO2 | hsa-miR-548az-5p |
| AGO2 | hsa-miR-7244-3p  |
| AGO2 | hsa-miR-7472-5p  |
| AGO2 | hsa-miR-3105-5p  |
| AGO2 | hsa-miR-6995-5p  |
| AGO2 | hsa-miR-7251-3p  |
| AGO2 | hsa-miR-3169     |
| AGO2 | hsa-miR-3547-5p  |
| AGO2 | hsa-miR-141-3p   |
| AGO2 | hsa-miR-513b-5p  |
| AGO2 | hsa-miR-215-5p   |
| AGO2 | hsa-miR-1691     |
| AGO2 | hsa-miR-1729-5p  |
| AGO2 | hsa-miR-223-3p   |
| AGO2 | hsa-miR-518-3p   |
| AGO2 | hsa-miR-3119     |
| AGO2 | hsa-miR-7166-5p  |
| AGO2 | hsa-miR-8064     |
| AGO2 | hsa-miR-203-3p.1 |
| AGO2 | hsa-miR-8908-3p  |
| AGO2 | hsa-miR-19b-5p   |
| AGO2 | hsa-miR-7355-3p  |
| AGO2 | hsa-miR-6133     |
| AGO2 | hsa-miR-128-5p   |
| AGO2 | hsa-miR-2465     |
| AGO2 | hsa-miR-2483     |
| AGO2 | hsa-miR-7010-3p  |
| AGO2 | hsa-miR-7060-3p  |
| AGO2 | hsa-miR-300-5p   |
| AGO2 | hsa-miR-106b-5p  |
| AGO2 | hsa-miR-2897     |
| AGO2 | hsa-miR-129-2-3p |
| AGO2 | hsa-miR-1760     |
| AGO2 | hsa-miR-7058-5p  |
| AGO2 | hsa-miR-3099-5p  |
| AGO2 | hsa-miR-222-5p   |
| AGO2 | hsa-miR-2284c    |
| AGO2 | hsa-miR-1228-3p  |

|      |                  |
|------|------------------|
| AGO2 | hsa-miR-564      |
| AGO2 | hsa-miR-449-3p   |
| AGO2 | hsa-miR-7281-3p  |
| AGO2 | hsa-miR-6973a-5p |
| AGO2 | hsa-miR-32-5p    |
| AGO2 | hsa-miR-1747-3p  |
| AGO2 | hsa-miR-6888-5p  |
| AGO2 | hsa-miR-216-5p   |
| AGO2 | hsa-miR-7323-5p  |
| AGO2 | hsa-miR-2381     |
| AGO2 | hsa-miR-2448-3p  |
| AGO2 | hsa-miR-6991-5p  |
| AGO2 | hsa-miR-194-3p   |
| AGO2 | hsa-miR-3152-5p  |
| AGO2 | hsa-miR-7231-3p  |
| AGO2 | hsa-miR-3065-5p  |
| AGO2 | hsa-miR-1191b-5p |
| AGO2 | hsa-miR-7163-5p  |
| AGO2 | hsa-miR-7202-3p  |
| AGO2 | hsa-miR-6630-3p  |
| AGO2 | hsa-miR-3686     |
| AGO2 | hsa-miR-4428     |
| AGO2 | hsa-miR-7246-3p  |
| AGO2 | hsa-miR-6499-3p  |
| AGO2 | hsa-miR-502-5p   |
| AGO2 | hsa-miR-7339-5p  |
| AGO2 | hsa-miR-7467-3p  |
| AGO2 | hsa-miR-7370i-3p |
| AGO2 | hsa-miR-3062-3p  |
| AGO2 | hsa-miR-7386l-3p |
| AGO2 | hsa-miR-6086     |
| AGO2 | hsa-miR-5187-3p  |
| AGO2 | hsa-miR-6691-5p  |
| AGO2 | hsa-miR-2890     |
| AGO2 | hsa-miR-7043-3p  |
| AGO2 | hsa-miR-4769-3p  |
| AGO2 | hsa-miR-708-5p   |
| AGO2 | hsa-miR-374-3p   |
| AGO2 | hsa-miR-10a-3p   |
| AGO2 | hsa-miR-181d-5p  |
| AGO2 | hsa-miR-1258-5p  |
| AGO2 | hsa-miR-3065-3p  |
| AGO2 | hsa-miR-7052-3p  |
| AGO2 | hsa-miR-7336-3p  |
| AGO2 | hsa-miR-6836-3p  |
| AGO2 | hsa-miR-6678-3p  |

|      |                  |
|------|------------------|
| AGO2 | hsa-miR-7371a-5p |
| AGO2 | hsa-miR-30e-3p   |
| AGO2 | hsa-miR-548ao-3p |
| AGO2 | hsa-miR-92a-2-5p |
| AGO2 | hsa-miR-7180     |
| AGO2 | hsa-miR-219b-5p  |
| AGO2 | hsa-miR-6979-5p  |
| AGO2 | hsa-miR-3094-5p  |
| AGO2 | hsa-miR-1292-5p  |
| AGO2 | hsa-miR-6833-5p  |
| AGO2 | hsa-miR-606      |
| AGO2 | hsa-miR-7863     |
| AGO2 | hsa-miR-6743-5p  |
| AGO2 | hsa-miR-7341-3p  |
| AGO2 | hsa-miR-367-3p   |
| AGO2 | hsa-miR-6997-3p  |
| AGO2 | hsa-miR-199-3p   |
| AGO2 | hsa-miR-335-5p   |
| AGO2 | hsa-miR-5003-3p  |
| AGO2 | hsa-miR-548z     |
| AGO2 | hsa-miR-6126     |
| AGO2 | hsa-miR-8065     |
| AGO2 | hsa-miR-878-3p   |
| AGO2 | hsa-miR-8809     |
| AGO2 | hsa-miR-210-5p   |
| AGO2 | hsa-miR-7374a-3p |
| AGO2 | hsa-miR-8066     |
| AGO2 | hsa-miR-16c-3p   |
| AGO2 | hsa-miR-4487     |
| AGO2 | hsa-miR-3097-3p  |
| AGO2 | hsa-miR-3569-3p  |
| AGO2 | hsa-miR-7030-3p  |
| AGO2 | hsa-miR-4722-3p  |
| AGO2 | hsa-miR-1843     |
| AGO2 | hsa-miR-7297-5p  |
| AGO2 | hsa-miR-460-3p   |
| AGO2 | hsa-miR-4694-5p  |
| AGO2 | hsa-miR-2461-5p  |
| AGO2 | hsa-miR-7077-5p  |
| AGO2 | hsa-miR-3919     |
| AGO2 | hsa-miR-1722-3p  |
| AGO2 | hsa-miR-2129     |
| AGO2 | hsa-miR-2414     |
| AGO2 | hsa-miR-9768-3p  |
| AGO2 | hsa-miR-362-5p   |
| AGO2 | hsa-miR-1663-3p  |

|      |                      |
|------|----------------------|
| AGO2 | hsa-miR-659-5p       |
| AGO2 | hsa-miR-6131         |
| AGO2 | hsa-miR-6577-3p      |
| AGO2 | hsa-let-7ag-3p       |
| AGO2 | hsa-miR-561-5p       |
| AGO2 | hsa-miR-4422         |
| AGO2 | hsa-miR-3101-5p      |
| AGO2 | hsa-miR-6649-3p      |
| AGO2 | hsa-miR-3912-5p      |
| AGO2 | hsa-miR-6927-5p      |
| AGO2 | hsa-miR-698-3p       |
| AGO2 | hsa-miR-7116-5p      |
| AGO2 | hsa-miR-138-3p       |
| AGO2 | hsa-miR-770          |
| AGO2 | hsa-miR-22-3p        |
| AGO2 | hsa-miR-3186-3p      |
| AGO2 | hsa-miR-7069-5p      |
| AGO2 | hsa-miR-552-5p       |
| AGO2 | hsa-miR-3431         |
| AGO2 | hsa-miR-7465-3p      |
| AGO2 | hsa-miR-2682-3p      |
| AGO2 | hsa-miR-6914-5p      |
| AGO2 | hsa-miR-7448-3p      |
| AGO2 | hsa-miR-2373-5p      |
| AGO2 | hsa-miR-3600         |
| AGO2 | hsa-miR-7656-3p      |
| AGO2 | hsa-miR-6507-5p      |
| AGO2 | hsa-miR-3070-5p      |
| AGO2 | hsa-miR-7398n-3p     |
| AGO2 | hsa-miR-7385a-3p     |
| AGO2 | hsa-miR-7359-5p      |
| AGO2 | hsa-miR-183-5p       |
| AGO2 | hsa-miR-4276         |
| AGO2 | hsa-miR-1258         |
| AGO2 | hsa-miR-2284q        |
| AGO2 | hsa-miR-8113         |
| AGO2 | hsa-miR-6730-3p      |
| AGO2 | hsa-miR-3102-5p.2-5p |
| AGO2 | hsa-miR-7350-5p      |
| AGO2 | hsa-miR-203-3p.2     |
| AGO2 | hsa-miR-3650         |
| AGO2 | hsa-miR-8844         |
| AGO2 | hsa-miR-5582-3p      |
| AGO2 | hsa-miR-3109-5p      |
| AGO2 | hsa-miR-7290-3p      |
| AGO2 | hsa-miR-2329-5p      |



|      |                   |
|------|-------------------|
| AGO2 | hsa-miR-1537-5p   |
| AGO2 | hsa-miR-7037-5p   |
| AGO2 | hsa-miR-1434-3p   |
| AGO2 | hsa-miR-7222-3p   |
| AGO2 | hsa-miR-692       |
| AGO2 | hsa-miR-6768-3p   |
| AGO2 | hsa-miR-590-3p    |
| AGO2 | hsa-miR-6837-3p   |
| AGO2 | hsa-miR-4763-5p   |
| AGO2 | hsa-miR-2439-5p   |
| AGO2 | hsa-miR-16-3p     |
| AGO2 | hsa-miR-544-5p    |
| AGO2 | hsa-miR-5000-3p   |
| AGO2 | hsa-miR-1281      |
| AGO2 | hsa-miR-1258-3p   |
| AGO2 | hsa-miR-34b-3p    |
| AGO2 | hsa-miR-6077      |
| AGO2 | hsa-miR-6794-5p   |
| AGO2 | hsa-miR-1260a     |
| AGO2 | hsa-miR-4765      |
| AGO2 | hsa-miR-6549-3p   |
| AGO2 | hsa-miR-7462-5p   |
| AGO2 | hsa-miR-208a-3p   |
| AGO2 | hsa-miR-6982-3p   |
| AGO2 | hsa-miR-2401      |
| AGO2 | hsa-miR-7277-3p   |
| AGO2 | hsa-miR-3155a     |
| AGO2 | hsa-miR-6971-5p   |
| AGO2 | hsa-miR-322-5p    |
| AGO2 | hsa-miR-1702      |
| AGO2 | hsa-miR-7329-3p   |
| AGO2 | hsa-miR-3069-3p   |
| AGO2 | hsa-miR-5004-5p   |
| AGO2 | hsa-miR-1185-3p   |
| AGO2 | hsa-miR-7073-3p   |
| AGO2 | hsa-miR-4329      |
| AGO2 | hsa-miR-605-5p    |
| AGO2 | hsa-miR-3689a-5p  |
| AGO2 | hsa-miR-454-5p    |
| AGO2 | hsa-miR-532-5p    |
| AGO2 | hsa-miR-3971      |
| AGO2 | hsa-miR-145-5p    |
| AGO2 | hsa-miR-6399      |
| AGO2 | hsa-miR-181b-1-3p |
| AGO2 | hsa-miR-2450a     |
| AGO2 | hsa-miR-449b-3p   |

|      |                  |
|------|------------------|
| AGO2 | hsa-miR-892c-3p  |
| AGO2 | hsa-miR-1462-3p  |
| AGO2 | hsa-miR-7437-5p  |
| AGO2 | hsa-miR-2467-3p  |
| AGO2 | hsa-miR-500b-3p  |
| AGO2 | hsa-miR-6710-3p  |
| AGO2 | hsa-miR-190b     |
| AGO2 | hsa-miR-4649-5p  |
| AGO2 | hsa-miR-3090-5p  |
| AGO2 | hsa-miR-742-3p   |
| AGO2 | hsa-miR-148a-3p  |
| AGO2 | hsa-miR-125a-5p  |
| AGO2 | hsa-miR-1203     |
| AGO2 | hsa-miR-4661-3p  |
| AGO2 | hsa-let-7d-5p    |
| AGO2 | hsa-miR-8902     |
| AGO2 | hsa-miR-7011-3p  |
| AGO2 | hsa-miR-4719     |
| AGO2 | hsa-miR-320b     |
| AGO2 | hsa-miR-7669-3p  |
| AGO2 | hsa-miR-1544-3p  |
| AGO2 | hsa-miR-142      |
| AGO2 | hsa-miR-124-3p.2 |
| AGO2 | hsa-miR-1827     |
| AGO2 | hsa-miR-2285v    |
| AGO2 | hsa-miR-6999-5p  |
| AGO2 | hsa-miR-8889     |
| AGO2 | hsa-miR-6327     |
| AGO2 | hsa-miR-4738-3p  |
| AGO2 | hsa-miR-7256-5p  |
| AGO2 | hsa-miR-101-3p   |
| AGO2 | hsa-miR-6773-3p  |
| AGO2 | hsa-miR-6071     |
| AGO2 | hsa-miR-7286-3p  |
| AGO2 | hsa-miR-346-3p   |
| AGO2 | hsa-miR-382-5p   |
| AGO2 | hsa-miR-7162-3p  |
| AGO2 | hsa-miR-7289-5p  |
| AGO2 | hsa-miR-5621-5p  |
| AGO2 | hsa-miR-547-3p   |
| AGO2 | hsa-miR-1467-5p  |
| AGO2 | hsa-miR-548h-3p  |
| AGO2 | hsa-miR-10       |
| AGO2 | hsa-miR-5118     |
| AGO2 | hsa-miR-322-3p   |
| AGO2 | hsa-miR-2429     |

|      |                    |
|------|--------------------|
| AGO2 | hsa-miR-1766       |
| AGO2 | hsa-miR-6990-3p    |
| AGO2 | hsa-miR-6978-5p    |
| AGO2 | hsa-miR-2113       |
| AGO2 | hsa-miR-3583-5p    |
| AGO2 | hsa-miR-7020-5p    |
| AGO2 | hsa-miR-1291       |
| AGO2 | hsa-miR-4448       |
| AGO2 | hsa-miR-6836-5p    |
| AGO2 | hsa-miR-504        |
| AGO2 | hsa-miR-7466-5p    |
| AGO2 | hsa-miR-4324       |
| AGO2 | hsa-miR-8850       |
| AGO2 | hsa-miR-7684-3p    |
| AGO2 | hsa-miR-7024-3p    |
| AGO2 | hsa-miR-3180-5p    |
| AGO2 | hsa-miR-7201-3p    |
| AGO2 | hsa-miR-3475-3p    |
| AGO2 | hsa-miR-6873-5p    |
| AGO2 | hsa-miR-1236-3p    |
| AGO2 | hsa-miR-7272-5p    |
| AGO2 | hsa-miR-216a-5p    |
| AGO2 | hsa-miR-548aj-3p   |
| AGO2 | hsa-miR-125b-2-3p  |
| AGO2 | hsa-miR-216b-5p    |
| AGO2 | hsa-let-7f-1-3p    |
| AGO2 | hsa-miR-4743-5p    |
| AGO2 | hsa-miR-6564-5p    |
| AGO2 | hsa-miR-325        |
| AGO2 | hsa-miR-138-2-3p   |
| AGO2 | hsa-miR-133        |
| AGO2 | hsa-miR-8089       |
| AGO2 | hsa-miR-2323       |
| AGO2 | hsa-miR-4666b      |
| AGO2 | hsa-miR-7276-3p    |
| AGO2 | hsa-miR-153-3p     |
| AGO2 | hsa-miR-3161       |
| AGO2 | hsa-miR-1545b-3-3p |
| AGO2 | hsa-miR-488-3p     |
| AGO2 | hsa-miR-483-3p     |
| AGO2 | hsa-miR-138-5p     |
| AGO2 | hsa-miR-194-1-3p   |
| AGO2 | hsa-miR-2384       |
| AGO2 | hsa-miR-6891-5p    |
| AGO2 | hsa-miR-5626-5p    |
| AGO2 | hsa-miR-691        |

|      |                   |
|------|-------------------|
| AGO2 | hsa-miR-697       |
| AGO2 | hsa-miR-513a      |
| AGO2 | hsa-miR-8856      |
| AGO2 | hsa-miR-3192      |
| AGO2 | hsa-miR-4527      |
| AGO2 | hsa-miR-548       |
| AGO2 | hsa-miR-2452      |
| AGO2 | hsa-miR-582-3p    |
| AGO2 | hsa-miR-578       |
| AGO2 | hsa-miR-667-5p    |
| AGO2 | hsa-miR-551b-5p   |
| AGO2 | hsa-miR-3652      |
| AGO2 | hsa-miR-1838      |
| AGO2 | hsa-miR-6750-3p   |
| AGO2 | hsa-miR-6848-3p   |
| AGO2 | hsa-miR-6987-5p   |
| AGO2 | hsa-miR-628-3p    |
| AGO2 | hsa-miR-7296-3p   |
| AGO2 | hsa-miR-6578-3p   |
| AGO2 | hsa-miR-551-5p    |
| AGO2 | hsa-miR-6551-3p   |
| AGO2 | hsa-miR-743a-3p   |
| AGO2 | hsa-miR-590-5p    |
| AGO2 | hsa-miR-7117-3p   |
| AGO2 | hsa-miR-1669      |
| AGO2 | hsa-miR-374c-5p   |
| AGO2 | hsa-miR-135a-5p   |
| AGO2 | hsa-miR-219c-5p   |
| AGO2 | hsa-miR-8789      |
| AGO2 | hsa-miR-8864      |
| AGO2 | hsa-miR-2454-5p   |
| AGO2 | hsa-miR-2285y     |
| AGO2 | hsa-miR-199       |
| AGO2 | hsa-miR-8872      |
| AGO2 | hsa-miR-3617-5p   |
| AGO2 | hsa-miR-6749-3p   |
| AGO2 | hsa-miR-181b-2-3p |
| AGO2 | hsa-miR-3689f     |
| AGO2 | hsa-miR-3099-3p   |
| AGO2 | hsa-miR-8070      |
| AGO2 | hsa-miR-7269-3p   |
| AGO2 | hsa-let-7c-1-3p   |
| AGO2 | hsa-miR-548az-3p  |
| AGO2 | hsa-miR-128       |
| AGO2 | hsa-miR-548l      |
| AGO2 | hsa-miR-302c-3p   |

|      |                  |
|------|------------------|
| AGO2 | hsa-miR-6919-3p  |
| AGO2 | hsa-miR-5100     |
| AGO2 | hsa-miR-4535     |
| AGO2 | hsa-miR-3672     |
| AGO2 | hsa-miR-6548-5p  |
| AGO2 | hsa-miR-4272     |
| AGO2 | hsa-miR-4803     |
| AGO2 | hsa-miR-6841-5p  |
| AGO2 | hsa-miR-7198-3p  |
| AGO2 | hsa-miR-4659a-3p |
| AGO2 | hsa-miR-2483-3p  |
| AGO2 | hsa-miR-6842-5p  |
| AGO2 | hsa-miR-194-5p   |
| AGO2 | hsa-miR-6076     |
| AGO2 | hsa-miR-99-5p    |
| AGO2 | hsa-miR-4777-5p  |
| AGO2 | hsa-miR-6686-3p  |
| AGO2 | hsa-miR-6085     |
| AGO2 | hsa-miR-3162-3p  |
| AGO2 | hsa-miR-7482-5p  |
| AGO2 | hsa-miR-7652-3p  |
| AGO2 | hsa-miR-4665-5p  |
| AGO2 | hsa-miR-2417     |
| AGO2 | hsa-miR-6958-5p  |
| AGO2 | hsa-miR-20b-3p   |
| AGO2 | hsa-miR-2404     |
| AGO2 | hsa-miR-890-5p   |
| AGO2 | hsa-miR-130b-5p  |
| AGO2 | hsa-miR-7317-3p  |
| AGO2 | hsa-miR-1807     |
| AGO2 | hsa-miR-292b-3p  |
| AGO2 | hsa-miR-6950-5p  |
| AGO2 | hsa-miR-205-5p   |
| AGO2 | hsa-miR-330-3p.2 |
| AGO2 | hsa-miR-499b-5p  |
| AGO2 | hsa-miR-663b     |
| AGO2 | hsa-miR-3153     |
| AGO2 | hsa-miR-548ai    |
| AGO2 | hsa-miR-7647-3p  |
| AGO2 | hsa-miR-2402     |
| AGO2 | hsa-miR-718      |
| AGO2 | hsa-miR-1571     |
| AGO2 | hsa-miR-2370-3p  |
| AGO2 | hsa-miR-6529     |
| AGO2 | hsa-miR-7663-5p  |
| AGO2 | hsa-miR-522-3p   |

|      |                   |
|------|-------------------|
| AGO2 | hsa-miR-7247-5p   |
| AGO2 | hsa-miR-7113-3p   |
| AGO2 | hsa-miR-29b-1-5p  |
| AGO2 | hsa-miR-425-5p    |
| AGO2 | hsa-miR-434-5p    |
| AGO2 | hsa-miR-1667-5p   |
| AGO2 | hsa-miR-627-3p    |
| AGO2 | hsa-miR-154-3p    |
| AGO2 | hsa-miR-504-5p    |
| AGO2 | hsa-miR-3661      |
| AGO2 | hsa-miR-3106-5p   |
| AGO2 | hsa-miR-214-5p    |
| AGO2 | hsa-miR-874-3p    |
| AGO2 | hsa-miR-4316      |
| AGO2 | hsa-miR-639       |
| AGO2 | hsa-miR-669e-3p   |
| AGO2 | hsa-miR-4496      |
| AGO2 | hsa-miR-4445-5p   |
| AGO2 | hsa-miR-1626-3p   |
| AGO2 | hsa-miR-4796-3p   |
| AGO2 | hsa-miR-7385-5p   |
| AGO2 | hsa-miR-1626-5p   |
| AGO2 | hsa-miR-3131      |
| AGO2 | hsa-miR-4492      |
| AGO2 | hsa-miR-505-5p    |
| AGO2 | hsa-miR-6737-5p   |
| AGO2 | hsa-miR-5683      |
| AGO2 | hsa-miR-883a-5p   |
| AGO2 | hsa-miR-4742-5p   |
| AGO2 | hsa-miR-106-3p    |
| AGO2 | hsa-miR-491-3p    |
| AGO2 | hsa-miR-1194      |
| AGO2 | hsa-miR-7374c-3p  |
| AGO2 | hsa-miR-6337      |
| AGO2 | hsa-miR-7175-5p   |
| AGO2 | hsa-miR-466ade-3p |
| AGO2 | hsa-miR-8096      |
| AGO2 | hsa-miR-1721      |
| AGO2 | hsa-miR-7191-5p   |
| AGO2 | hsa-miR-3977      |
| AGO2 | hsa-miR-1640      |
| AGO2 | hsa-miR-877-5p    |
| AGO2 | hsa-miR-449c-3p   |
| AGO2 | hsa-miR-190-5p    |
| AGO2 | hsa-miR-187-3p    |
| AGO2 | hsa-miR-2881      |

|      |                  |
|------|------------------|
| AGO2 | hsa-miR-7227-3p  |
| AGO2 | hsa-miR-124-3p.1 |
| AGO2 | hsa-miR-6754-5p  |
| AGO2 | hsa-miR-6613-3p  |
| AGO2 | hsa-miR-5587-3p  |
| AGO2 | hsa-miR-7029-3p  |
| AGO2 | hsa-miR-5581-5p  |
| AGO2 | hsa-miR-7387-5p  |
| AGO2 | hsa-miR-6697-5p  |
| AGO2 | hsa-miR-6336     |
| AGO2 | hsa-miR-6772-3p  |
| AGO2 | hsa-miR-4639-3p  |
| AGO2 | hsa-miR-7112-3p  |
| AGO2 | hsa-miR-514a-3p  |
| AGO2 | hsa-miR-154b     |
| AGO2 | hsa-miR-376c     |
| AGO2 | hsa-miR-500-3p   |
| AGO2 | hsa-miR-3533     |
| AGO2 | hsa-miR-3607-5p  |
| AGO2 | hsa-miR-224-5p   |
| AGO2 | hsa-miR-148b-5p  |
| AGO2 | hsa-miR-7307-5p  |
| AGO2 | hsa-miR-4446     |
| AGO2 | hsa-miR-500-5p   |
| AGO2 | hsa-miR-1586     |
| AGO2 | hsa-miR-1615     |
| AGO2 | hsa-miR-6976-3p  |
| AGO2 | hsa-miR-3956     |
| AGO2 | hsa-miR-802-3p   |
| AGO2 | hsa-miR-7053-5p  |
| AGO2 | hsa-miR-373-3p   |
| AGO2 | hsa-miR-877-5p   |
| AGO2 | hsa-miR-4300     |
| AGO2 | hsa-miR-506-5p   |
| AGO2 | hsa-miR-1690-5p  |
| AGO2 | hsa-miR-676-3p   |
| AGO2 | hsa-miR-6523a    |
| AGO2 | hsa-miR-7023-5p  |
| AGO2 | hsa-miR-613      |
| AGO2 | hsa-miR-23a-5p   |
| AGO2 | hsa-miR-4423-3p  |
| AGO2 | hsa-miR-520c-3p  |
| AGO2 | hsa-miR-7672-3p  |
| AGO2 | hsa-miR-1632-3p  |
| AGO2 | hsa-miR-20-3p    |
| AGO2 | hsa-miR-3059-3p  |

|      |                  |
|------|------------------|
| AGO2 | hsa-miR-548a-5p  |
| AGO2 | hsa-miR-6972-5p  |
| AGO2 | hsa-miR-92a-1-5p |
| AGO2 | hsa-miR-8871     |
| AGO2 | hsa-miR-6397     |
| AGO2 | hsa-miR-3671     |
| AGO2 | hsa-miR-154-5p   |
| AGO2 | hsa-miR-7373d-3p |
| AGO2 | hsa-miR-655-3p   |
| AGO2 | hsa-miR-1251     |
| AGO2 | hsa-miR-892a     |
| AGO2 | hsa-miR-1225-3p  |
| AGO2 | hsa-miR-7107-3p  |
| AGO2 | hsa-miR-411-5p   |
| AGO2 | hsa-miR-188-3p   |
| AGO2 | hsa-miR-509-3p   |
| AGO2 | hsa-miR-1193-3p  |
| AGO2 | hsa-miR-6795-3p  |
| AGO2 | hsa-miR-3942-5p  |
| AGO2 | hsa-miR-489-3p   |
| AGO2 | hsa-miR-498      |
| AGO2 | hsa-miR-4474-3p  |
| AGO2 | hsa-miR-3938     |
| AGO2 | hsa-miR-7292-5p  |
| AGO2 | hsa-miR-7398s-3p |
| AGO2 | hsa-miR-6899-5p  |
| AGO2 | hsa-miR-669j     |
| AGO2 | hsa-miR-593-5p   |
| AGO2 | hsa-miR-2466-3p  |
| AGO2 | hsa-miR-6586-5p  |
| AGO2 | hsa-miR-2438     |
| AGO2 | hsa-miR-6718-5p  |
| AGO2 | hsa-miR-548g-3p  |
| AGO2 | hsa-miR-615-5p   |
| AGO2 | hsa-miR-584-3p   |
| AGO2 | hsa-miR-7161-3p  |
| AGO2 | hsa-miR-4731-5p  |
| AGO2 | hsa-miR-6976-5p  |
| AGO2 | hsa-miR-3177-5p  |
| AGO2 | hsa-miR-7055-5p  |
| AGO2 | hsa-miR-7212-5p  |
| AGO2 | hsa-miR-127-5p   |
| AGO2 | hsa-miR-5093     |
| AGO2 | hsa-miR-6090     |
| AGO2 | hsa-miR-3133     |
| AGO2 | hsa-miR-6882-5p  |



|      |                   |
|------|-------------------|
| AGO2 | hsa-miR-7357-5p   |
| AGO2 | hsa-miR-3073a-3p  |
| AGO2 | hsa-miR-5699-5p   |
| AGO2 | hsa-miR-3070-3p   |
| AGO2 | hsa-miR-6948-5p   |
| AGO2 | hsa-miR-7293-5p   |
| AGO2 | hsa-miR-6964-3p   |
| AGO2 | hsa-miR-1697      |
| AGO2 | hsa-miR-1679      |
| AGO2 | hsa-miR-466bco-5p |
| AGO2 | hsa-miR-7044-3p   |
| AGO2 | hsa-miR-7333-5p   |
| AGO2 | hsa-miR-519d-3p   |
| AGO2 | hsa-miR-8842      |
| AGO2 | hsa-miR-4747-5p   |
| AGO2 | hsa-miR-1643-5p   |
| AGO2 | hsa-miR-6544-5p   |
| AGO2 | hsa-miR-5008-5p   |
| AGO2 | hsa-miR-4488      |
| AGO2 | hsa-miR-7287-5p   |
| AGO2 | hsa-miR-1207      |
| AGO2 | hsa-miR-669a-3-3p |
| AGO2 | hsa-miR-4522      |
| AGO2 | hsa-miR-154-5p    |
| AGO2 | hsa-miR-330-3p    |
| AGO2 | hsa-miR-4261      |
| AGO2 | hsa-miR-1705      |
| AGO2 | hsa-miR-4303      |
| AGO2 | hsa-miR-450b-5p   |
| AGO2 | hsa-miR-597-3p    |
| AGO2 | hsa-miR-140-3p.2  |
| AGO2 | hsa-miR-7073-5p   |
| AGO2 | hsa-miR-6997-5p   |
| AGO2 | hsa-miR-7014-5p   |
| AGO2 | hsa-miR-7665-3p   |
| AGO2 | hsa-miR-196       |
| AGO2 | hsa-miR-4762-3p   |
| AGO2 | hsa-miR-326-5p    |
| AGO2 | hsa-miR-125       |
| AGO2 | hsa-let-7i-3p     |
| AGO2 | hsa-miR-376b-3p   |
| AGO2 | hsa-miR-1245b-5p  |
| AGO2 | hsa-miR-4780      |
| AGO2 | hsa-miR-4432      |
| AGO2 | hsa-miR-6769a-5p  |
| AGO2 | hsa-miR-4742-3p   |

|      |                   |
|------|-------------------|
| AGO2 | hsa-miR-1285-5p   |
| AGO2 | hsa-miR-7191-3p   |
| AGO2 | hsa-miR-31-3p     |
| AGO2 | hsa-miR-3121-3p   |
| AGO2 | hsa-miR-1225-5p   |
| AGO2 | hsa-miR-3116      |
| AGO2 | hsa-miR-764       |
| AGO2 | hsa-miR-6072      |
| AGO2 | hsa-miR-3602      |
| AGO2 | hsa-miR-1544-5p   |
| AGO2 | hsa-miR-2110      |
| AGO2 | hsa-miR-5088-5p   |
| AGO2 | hsa-miR-3691-3p   |
| AGO2 | hsa-miR-4779      |
| AGO2 | hsa-miR-508b      |
| AGO2 | hsa-miR-6797-3p   |
| AGO2 | hsa-miR-6677-5p   |
| AGO2 | hsa-miR-1198-3p   |
| AGO2 | hsa-miR-891a-5p   |
| AGO2 | hsa-miR-7331-5p   |
| AGO2 | hsa-miR-2325      |
| AGO2 | hsa-miR-2439-3p   |
| AGO2 | hsa-miR-298       |
| AGO2 | hsa-miR-7222-5p   |
| AGO2 | hsa-miR-545-3p    |
| AGO2 | hsa-miR-4470      |
| AGO2 | hsa-miR-8908-5p   |
| AGO2 | hsa-miR-7179-3p   |
| AGO2 | hsa-miR-6910-3p   |
| AGO2 | hsa-miR-6683-3p   |
| AGO2 | hsa-miR-1543      |
| AGO2 | hsa-miR-7340-5p   |
| AGO2 | hsa-miR-92b-5p    |
| AGO2 | hsa-miR-6801-5p   |
| AGO2 | hsa-miR-124c-5p   |
| AGO2 | hsa-miR-103-2-5p  |
| AGO2 | hsa-miR-1892      |
| AGO2 | hsa-miR-1b-5p     |
| AGO2 | hsa-miR-4302      |
| AGO2 | hsa-miR-548cej-3p |
| AGO2 | hsa-miR-4654      |
| AGO2 | hsa-miR-3183      |
| AGO2 | hsa-miR-6548-3p   |
| AGO2 | hsa-miR-7042-3p   |
| AGO2 | hsa-miR-653-3p    |
| AGO2 | hsa-miR-7093-5p   |

|      |                  |
|------|------------------|
| AGO2 | hsa-miR-872-3p   |
| AGO2 | hsa-miR-1909-5p  |
| AGO2 | hsa-miR-7229-3p  |
| AGO2 | hsa-miR-3649     |
| AGO2 | hsa-miR-1197-3p  |
| AGO2 | hsa-miR-4797-3p  |
| AGO2 | hsa-miR-500a-3p  |
| AGO2 | hsa-miR-6641-3p  |
| AGO2 | hsa-miR-24-3p    |
| AGO2 | hsa-miR-2373-3p  |
| AGO2 | hsa-miR-142-3p.2 |
| AGO2 | hsa-miR-4468     |
| AGO2 | hsa-miR-2428     |
| AGO2 | hsa-miR-7257-5p  |
| AGO2 | hsa-miR-4418     |
| AGO2 | hsa-miR-4690-5p  |
| AGO2 | hsa-miR-4762-5p  |
| AGO2 | hsa-miR-2343     |
| AGO2 | hsa-miR-365-3p   |
| AGO2 | hsa-miR-6510-3p  |
| AGO2 | hsa-miR-677-5p   |
| AGO2 | hsa-miR-7370-5p  |
| AGO2 | hsa-miR-7455-3p  |
| AGO2 | hsa-miR-1769-5p  |
| AGO2 | hsa-miR-2285     |
| AGO2 | hsa-miR-8790     |
| AGO2 | hsa-miR-6817-3p  |
| AGO2 | hsa-miR-4640-3p  |
| AGO2 | hsa-miR-371      |
| AGO2 | hsa-miR-7071-3p  |
| AGO2 | hsa-miR-1-3p     |
| AGO2 | hsa-miR-8877     |
| AGO2 | hsa-miR-3067-3p  |
| AGO2 | hsa-miR-766-3p   |
| AGO2 | hsa-miR-4648     |
| AGO2 | hsa-miR-562      |
| AGO2 | hsa-miR-4278     |
| AGO2 | hsa-miR-8832     |
| AGO2 | hsa-miR-1298     |
| AGO2 | hsa-miR-1323     |
| AGO2 | hsa-miR-3120-3p  |
| AGO2 | hsa-miR-877-3p   |
| AGO2 | hsa-miR-376ab    |
| AGO2 | hsa-miR-6545-5p  |
| AGO2 | hsa-miR-7332-5p  |
| AGO2 | hsa-miR-7464-3p  |

|      |                  |
|------|------------------|
| AGO2 | hsa-miR-7388c-5p |
| AGO2 | hsa-miR-487a-3p  |
| AGO2 | hsa-miR-655-5p   |
| AGO2 | hsa-miR-7226-3p  |
| AGO2 | hsa-miR-8796     |
| AGO2 | hsa-miR-8825     |
| AGO2 | hsa-miR-7324-3p  |
| AGO2 | hsa-miR-2284m    |
| AGO2 | hsa-miR-3620-3p  |
| AGO2 | hsa-miR-7094-3p  |
| AGO2 | hsa-miR-598-5p   |
| AGO2 | hsa-miR-1839-5p  |
| AGO2 | hsa-miR-4777-3p  |
| AGO2 | hsa-miR-27-3p    |
| AGO2 | hsa-miR-1251-5p  |
| AGO2 | hsa-miR-509-3p   |
| AGO2 | hsa-miR-6120-3p  |
| AGO2 | hsa-miR-569      |
| AGO2 | hsa-miR-7353-5p  |
| AGO2 | hsa-miR-6913-3p  |
| AGO2 | hsa-miR-1193     |
| AGO2 | hsa-miR-8793     |
| AGO2 | hsa-miR-1655-3p  |
| AGO2 | hsa-miR-3095-3p  |
| AGO2 | hsa-miR-3918     |
| AGO2 | hsa-miR-665-5p   |
| AGO2 | hsa-miR-1938     |
| AGO2 | hsa-miR-344-3p   |
| AGO2 | hsa-miR-1688     |
| AGO2 | hsa-miR-5690     |
| AGO2 | hsa-miR-4446-3p  |
| AGO2 | hsa-miR-6074     |
| AGO2 | hsa-miR-2431-5p  |
| AGO2 | hsa-miR-1795     |
| AGO2 | hsa-miR-5586-5p  |
| AGO2 | hsa-miR-7373b-3p |
| AGO2 | hsa-miR-137      |
| AGO2 | hsa-miR-509-5p   |
| AGO2 | hsa-miR-466c-3p  |
| AGO2 | hsa-miR-4708-5p  |
| AGO2 | hsa-miR-7687-3p  |
| AGO2 | hsa-miR-7332-3p  |
| AGO2 | hsa-miR-7159-3p  |
| AGO2 | hsa-miR-8068     |
| AGO2 | hsa-miR-4268     |
| AGO2 | hsa-miR-4484     |

|      |                  |
|------|------------------|
| AGO2 | hsa-miR-1236-3p  |
| AGO2 | hsa-miR-1234-3p  |
| AGO2 | hsa-let-7i-5p    |
| AGO2 | hsa-miR-3087-3p  |
| AGO2 | hsa-miR-1191b-3p |
| AGO2 | hsa-miR-7087-5p  |
| AGO2 | hsa-miR-3473g    |
| AGO2 | hsa-miR-32-3p    |
| AGO2 | hsa-miR-7274-5p  |
| AGO2 | hsa-miR-4725-3p  |
| AGO2 | hsa-miR-6510-5p  |
| AGO2 | hsa-miR-4656     |
| AGO2 | hsa-miR-6941-3p  |
| AGO2 | hsa-miR-6511-5p  |
| AGO2 | hsa-miR-217-3p   |
| AGO2 | hsa-miR-5002-5p  |
| AGO2 | hsa-miR-6790-5p  |
| AGO2 | hsa-miR-3596a    |
| AGO2 | hsa-miR-3609     |
| AGO2 | hsa-miR-6888-3p  |
| AGO2 | hsa-miR-6875-3p  |
| AGO2 | hsa-miR-705      |
| AGO2 | hsa-miR-3526     |
| AGO2 | hsa-miR-6797-5p  |
| AGO2 | hsa-miR-1933-3p  |
| AGO2 | hsa-miR-219c-3p  |
| AGO2 | hsa-miR-4804-3p  |
| AGO2 | hsa-miR-6860     |
| AGO2 | hsa-miR-3179     |
| AGO2 | hsa-miR-2285t    |
| AGO2 | hsa-miR-2311     |
| AGO2 | hsa-miR-871-3p   |
| AGO2 | hsa-miR-2902     |
| AGO2 | hsa-miR-15b-3p   |
| AGO2 | hsa-miR-6584-5p  |
| AGO2 | hsa-miR-467f     |
| AGO2 | hsa-miR-6573-3p  |
| AGO2 | hsa-miR-487a     |
| AGO2 | hsa-miR-548j-3p  |
| AGO2 | hsa-miR-3074-3p  |
| AGO2 | hsa-miR-6870-5p  |
| AGO2 | hsa-miR-526      |
| AGO2 | hsa-miR-6582-3p  |
| AGO2 | hsa-miR-3136-3p  |
| AGO2 | hsa-miR-7223-3p  |
| AGO2 | hsa-miR-152-3p   |

|      |                  |
|------|------------------|
| AGO2 | hsa-miR-2116-5p  |
| AGO2 | hsa-miR-2331-5p  |
| AGO2 | hsa-miR-6738-3p  |
| AGO2 | hsa-miR-599-3p   |
| AGO2 | hsa-miR-6907-5p  |
| AGO2 | hsa-miR-1227-5p  |
| AGO2 | hsa-miR-6774-5p  |
| AGO2 | hsa-miR-6848-5p  |
| AGO2 | hsa-miR-4763-3p  |
| AGO2 | hsa-miR-8794     |
| AGO2 | hsa-miR-665-3p   |
| AGO2 | hsa-miR-30c-2-3p |
| AGO2 | hsa-miR-6614-3p  |
| AGO2 | hsa-miR-6963-3p  |
| AGO2 | hsa-miR-652-5p   |
| AGO2 | hsa-miR-512      |
| AGO2 | hsa-miR-7152-3p  |
| AGO2 | hsa-miR-452-5p   |
| AGO2 | hsa-miR-6988-3p  |
| AGO2 | hsa-miR-6569-3p  |
| AGO2 | hsa-miR-336-5p   |
| AGO2 | hsa-miR-7233-5p  |
| AGO2 | hsa-miR-6810-3p  |
| AGO2 | hsa-miR-16-5p    |
| AGO2 | hsa-miR-200c-5p  |
| AGO2 | hsa-miR-197-3p   |
| AGO2 | hsa-miR-378      |
| AGO2 | hsa-miR-7268-5p  |
| AGO2 | hsa-miR-548b-3p  |
| AGO2 | hsa-miR-2290     |
| AGO2 | hsa-miR-483-3p.2 |
| AGO2 | hsa-miR-7088-3p  |
| AGO2 | hsa-miR-7108-5p  |
| AGO2 | hsa-miR-676-5p   |
| AGO2 | hsa-miR-218-1-3p |
| AGO2 | hsa-miR-4711-5p  |
| AGO2 | hsa-miR-649      |
| AGO2 | hsa-miR-137-3p   |
| AGO2 | hsa-miR-188-5p   |
| AGO2 | hsa-miR-376abd   |
| AGO2 | hsa-miR-8887     |
| AGO2 | hsa-miR-7451-3p  |
| AGO2 | hsa-miR-1572     |
| AGO2 | hsa-miR-5116     |
| AGO2 | hsa-miR-5193     |
| AGO2 | hsa-miR-547-5p   |

|      |                   |
|------|-------------------|
| AGO2 | hsa-miR-30c-1-3p  |
| AGO2 | hsa-miR-6360      |
| AGO2 | hsa-miR-6537-5p   |
| AGO2 | hsa-miR-4314      |
| AGO2 | hsa-miR-1197      |
| AGO2 | hsa-miR-2485      |
| AGO2 | hsa-miR-219a-2-3p |
| AGO2 | hsa-miR-6887-5p   |
| AGO2 | hsa-miR-548e-3p   |
| AGO2 | hsa-miR-8093      |
| AGO2 | hsa-miR-6400      |
| AGO2 | hsa-miR-6733-3p   |
| AGO2 | hsa-miR-6505-5p   |
| AGO2 | hsa-miR-1276      |
| AGO2 | hsa-miR-4435      |
| AGO2 | hsa-miR-106a-3p   |
| AGO2 | hsa-miR-15b-5p    |
| AGO2 | hsa-miR-107       |
| AGO2 | hsa-miR-6765-3p   |
| AGO2 | hsa-miR-188-5p    |
| AGO2 | hsa-miR-302c-3p.1 |
| AGO2 | hsa-miR-3192-5p   |
| AGO2 | hsa-miR-7000-5p   |
| AGO2 | hsa-miR-642a-5p   |
| AGO2 | hsa-miR-574-3p    |
| AGO2 | hsa-miR-2486-3p   |
| AGO2 | hsa-miR-6949-5p   |
| AGO2 | hsa-miR-144-3p    |
| AGO2 | hsa-miR-7184-5p   |
| AGO2 | hsa-miR-2284n     |
| AGO2 | hsa-miR-100-3p    |
| AGO2 | hsa-miR-6972-3p   |
| AGO2 | hsa-miR-302       |
| AGO2 | hsa-miR-2284i     |
| AGO2 | hsa-miR-3064      |
| AGO2 | hsa-miR-873-5p    |
| AGO2 | hsa-miR-2337      |
| AGO2 | hsa-miR-4296      |
| AGO2 | hsa-miR-1780      |
| AGO2 | hsa-miR-7168-3p   |
| AGO2 | hsa-miR-135a-3p   |
| AGO2 | hsa-miR-6715b-5p  |
| AGO2 | hsa-miR-520-5p    |
| AGO2 | hsa-miR-155-5p    |
| AGO2 | hsa-miR-8845      |
| AGO2 | hsa-miR-217       |

|      |                  |
|------|------------------|
| AGO2 | hsa-miR-466l-3p  |
| AGO2 | hsa-miR-500      |
| AGO2 | hsa-miR-6862-5p  |
| AGO2 | hsa-miR-26-2-3p  |
| AGO2 | hsa-miR-1286     |
| AGO2 | hsa-miR-6715-5p  |
| AGO2 | hsa-miR-743b-5p  |
| AGO2 | hsa-miR-6676-3p  |
| AGO2 | hsa-miR-20       |
| AGO2 | hsa-miR-24-3p    |
| AGO2 | hsa-miR-29c-3p   |
| AGO2 | hsa-miR-574-5p   |
| AGO2 | hsa-miR-122-5p   |
| AGO2 | hsa-miR-7374b-3p |
| AGO2 | hsa-miR-4259     |
| AGO2 | hsa-miR-520g-5p  |
| AGO2 | hsa-miR-7848-3p  |
| AGO2 | hsa-miR-4666a-5p |
| AGO2 | hsa-miR-7011-5p  |
| AGO2 | hsa-miR-3147     |
| AGO2 | hsa-miR-21-5p    |
| AGO2 | hsa-miR-4716-3p  |
| AGO2 | hsa-miR-3182     |
| AGO2 | hsa-miR-9a-3p    |
| AGO2 | hsa-miR-5694     |
| AGO2 | hsa-miR-605-3p   |
| AGO2 | hsa-miR-2115-3p  |
| AGO2 | hsa-miR-4657     |
| AGO2 | hsa-miR-6417     |
| AGO2 | hsa-miR-6377     |
| AGO2 | hsa-miR-30d-5p   |
| AGO2 | hsa-miR-3083-5p  |
| AGO2 | hsa-miR-885      |
| AGO2 | hsa-miR-4768-3p  |
| AGO2 | hsa-miR-3614-5p  |
| AGO2 | hsa-miR-876      |
| AGO2 | hsa-miR-8834a    |
| AGO2 | hsa-miR-3177-3p  |
| AGO2 | hsa-miR-6654-3p  |
| AGO2 | hsa-miR-433      |
| AGO2 | hsa-miR-106      |
| AGO2 | hsa-miR-4735-5p  |
| AGO2 | hsa-miR-6563-5p  |
| AGO2 | hsa-miR-3907     |
| AGO2 | hsa-miR-7022-3p  |
| AGO2 | hsa-miR-548aw    |



|      |                  |
|------|------------------|
| AGO2 | hsa-miR-5581-3p  |
| AGO2 | hsa-miR-7167-5p  |
| AGO2 | hsa-miR-6134     |
| AGO2 | hsa-miR-377-3p   |
| AGO2 | hsa-miR-603      |
| AGO2 | hsa-miR-549a     |
| AGO2 | hsa-miR-448-5p   |
| AGO2 | hsa-miR-6799-5p  |
| AGO2 | hsa-miR-3066-3p  |
| AGO2 | hsa-miR-2434     |
| AGO2 | hsa-miR-2284d    |
| AGO2 | hsa-miR-2297     |
| AGO2 | hsa-miR-449a     |
| AGO2 | hsa-miR-7351-5p  |
| AGO2 | hsa-miR-2309     |
| AGO2 | hsa-miR-196b-3p  |
| AGO2 | hsa-miR-7119-3p  |
| AGO2 | hsa-miR-5110     |
| AGO2 | hsa-miR-1272     |
| AGO2 | hsa-miR-4436b-5p |
| AGO2 | hsa-miR-4760-3p  |
| AGO2 | hsa-miR-519d-5p  |
| AGO2 | hsa-miR-3909     |
| AGO2 | hsa-miR-8099     |
| AGO2 | hsa-miR-6881-5p  |
| AGO2 | hsa-miR-142b     |
| AGO2 | hsa-miR-6953-5p  |
| AGO2 | hsa-miR-7465-5p  |
| AGO2 | hsa-miR-1912-3p  |
| AGO2 | hsa-miR-3088-5p  |
| AGO2 | hsa-miR-6787-3p  |
| AGO2 | hsa-miR-290      |
| AGO2 | hsa-miR-1676-5p  |
| AGO2 | hsa-miR-7002-5p  |
| AGO2 | hsa-miR-921      |
| AGO2 | hsa-miR-4673     |
| AGO2 | hsa-miR-3164     |
| AGO2 | hsa-miR-7053-3p  |
| AGO2 | hsa-miR-8797     |
| AGO2 | hsa-miR-4999-5p  |
| AGO2 | hsa-miR-301      |
| AGO2 | hsa-miR-8818     |
| AGO2 | hsa-miR-5089-5p  |
| AGO2 | hsa-miR-2896     |
| AGO2 | hsa-miR-95       |
| AGO2 | hsa-miR-761      |

|      |                  |
|------|------------------|
| AGO2 | hsa-miR-6526     |
| AGO2 | hsa-miR-7274-3p  |
| AGO2 | hsa-miR-700-5p   |
| AGO2 | hsa-miR-1726     |
| AGO2 | hsa-miR-190a-5p  |
| AGO2 | hsa-miR-767-5p   |
| AGO2 | hsa-miR-4753-5p  |
| AGO2 | hsa-miR-329b     |
| AGO2 | hsa-miR-192-3p   |
| AGO2 | hsa-miR-3595     |
| AGO2 | hsa-miR-920      |
| AGO2 | hsa-miR-4714-5p  |
| AGO2 | hsa-miR-5001-5p  |
| AGO2 | hsa-miR-301-3p   |
| AGO2 | hsa-miR-8071     |
| AGO2 | hsa-miR-6964-5p  |
| AGO2 | hsa-miR-7263-5p  |
| AGO2 | hsa-miR-7012-5p  |
| AGO2 | hsa-miR-452-3p   |
| AGO2 | hsa-miR-4485-3p  |
| AGO2 | hsa-miR-6959-5p  |
| AGO2 | hsa-miR-7199-5p  |
| AGO2 | hsa-miR-7388b-5p |
| AGO2 | hsa-miR-3064-5p  |
| AGO2 | hsa-miR-3071-3p  |
| AGO2 | hsa-miR-1552-5p  |
| AGO2 | hsa-miR-6124     |
| AGO2 | hsa-miR-548y     |
| AGO2 | hsa-miR-892-5p   |
| AGO2 | hsa-miR-2116-3p  |
| AGO2 | hsa-miR-3096-3p  |
| AGO2 | hsa-miR-7670-5p  |
| AGO2 | hsa-miR-487-3p   |
| AGO2 | hsa-miR-3937     |
| AGO2 | hsa-miR-642      |
| AGO2 | hsa-miR-548bd-3p |
| AGO2 | hsa-miR-619-5p   |
| AGO2 | hsa-miR-7472-3p  |
| AGO2 | hsa-miR-4282     |
| AGO2 | hsa-miR-7386i-5p |
| AGO2 | hsa-miR-2379     |
| AGO2 | hsa-miR-1269a    |
| AGO2 | hsa-miR-6537-3p  |
| AGO2 | hsa-miR-8904a    |
| AGO2 | hsa-miR-466q     |
| AGO2 | hsa-miR-4686     |

|      |                  |
|------|------------------|
| AGO2 | hsa-miR-4311     |
| AGO2 | hsa-miR-6121-5p  |
| AGO2 | hsa-miR-7113-5p  |
| AGO2 | hsa-miR-345-5p   |
| AGO2 | hsa-miR-6867-5p  |
| AGO2 | hsa-miR-1956-3p  |
| AGO2 | hsa-miR-6764-3p  |
| AGO2 | hsa-miR-7186-5p  |
| AGO2 | hsa-miR-548d-3p  |
| AGO2 | hsa-miR-7152-5p  |
| AGO2 | hsa-miR-6769b-3p |
| AGO2 | hsa-miR-7441-3p  |
| AGO2 | hsa-miR-6081     |
| AGO2 | hsa-miR-4499     |
| AGO2 | hsa-miR-2364     |
| AGO2 | hsa-miR-1252     |
| AGO2 | hsa-miR-6851-5p  |
| AGO2 | hsa-miR-7398a-3p |
| AGO2 | hsa-miR-6900-5p  |
| AGO2 | hsa-miR-6335     |
| AGO2 | hsa-miR-2395     |
| AGO2 | hsa-miR-616-5p   |
| AGO2 | hsa-miR-7363-5p  |
| AGO2 | hsa-miR-6784-5p  |
| AGO2 | hsa-miR-2398     |
| AGO2 | hsa-miR-6542-5p  |
| AGO2 | hsa-let-7-5p     |
| AGO2 | hsa-miR-6926-3p  |
| AGO2 | hsa-miR-2887     |
| AGO2 | hsa-miR-3103-5p  |
| AGO2 | hsa-miR-694      |
| AGO2 | hsa-miR-7361-5p  |
| AGO2 | hsa-miR-8800     |
| AGO2 | hsa-miR-3675-3p  |
| AGO2 | hsa-miR-6914-3p  |
| AGO2 | hsa-miR-6516-3p  |
| AGO2 | hsa-miR-1548-3p  |
| AGO2 | hsa-miR-1271-5p  |
| AGO2 | hsa-miR-4789-5p  |
| AGO2 | hsa-miR-5187-5p  |
| AGO2 | hsa-miR-302f     |
| AGO2 | hsa-miR-8063     |
| AGO2 | hsa-miR-4797-5p  |
| AGO2 | hsa-miR-6833-3p  |
| AGO2 | hsa-miR-3134     |
| AGO2 | hsa-miR-6963-5p  |

|      |                  |
|------|------------------|
| AGO2 | hsa-miR-4524-5p  |
| AGO2 | hsa-miR-544a     |
| AGO2 | hsa-miR-3941     |
| AGO2 | hsa-miR-519      |
| AGO2 | hsa-miR-4502     |
| AGO2 | hsa-miR-7037-3p  |
| AGO2 | hsa-miR-299-3p   |
| AGO2 | hsa-miR-6736-5p  |
| AGO2 | hsa-miR-485      |
| AGO2 | hsa-miR-203a-5p  |
| AGO2 | hsa-miR-5009-5p  |
| AGO2 | hsa-miR-376c-3p  |
| AGO2 | hsa-miR-6922-5p  |
| AGO2 | hsa-miR-8833     |
| AGO2 | hsa-miR-561-3p   |
| AGO2 | hsa-miR-1224     |
| AGO2 | hsa-miR-6244     |
| AGO2 | hsa-miR-5619-3p  |
| AGO2 | hsa-miR-6986-3p  |
| AGO2 | hsa-miR-6740-3p  |
| AGO2 | hsa-miR-2285n    |
| AGO2 | hsa-miR-548as-5p |
| AGO2 | hsa-miR-743-5p   |
| AGO2 | hsa-miR-7061-5p  |
| AGO2 | hsa-miR-7060-5p  |
| AGO2 | hsa-miR-1668     |
| AGO2 | hsa-miR-138-1-3p |
| AGO2 | hsa-miR-7031-3p  |
| AGO2 | hsa-miR-6655-5p  |
| AGO2 | hsa-miR-6123     |
| AGO2 | hsa-miR-3122     |
| AGO2 | hsa-miR-6891-3p  |
| AGO2 | hsa-miR-548ba    |
| AGO2 | hsa-miR-6855-3p  |
| AGO2 | hsa-miR-1542-5p  |
| AGO2 | hsa-miR-518bc-3p |
| AGO2 | hsa-miR-703      |
| AGO2 | hsa-miR-9500     |
| AGO2 | hsa-miR-556-5p   |
| AGO2 | hsa-miR-6412     |
| AGO2 | hsa-miR-7649-5p  |
| AGO2 | hsa-miR-186-3p   |
| AGO2 | hsa-miR-4759     |
| AGO2 | hsa-miR-196-2-3p |
| AGO2 | hsa-miR-4464     |
| AGO2 | hsa-miR-690      |

|      |                  |
|------|------------------|
| AGO2 | hsa-miR-6807-5p  |
| AGO2 | hsa-miR-125-5p   |
| AGO2 | hsa-miR-29b-5p   |
| AGO2 | hsa-miR-200bc    |
| AGO2 | hsa-miR-2421     |
| AGO2 | hsa-miR-8107     |
| AGO2 | hsa-miR-7193-3p  |
| AGO2 | hsa-miR-514b-5p  |
| AGO2 | hsa-miR-513a-3p  |
| AGO2 | hsa-miR-8860     |
| AGO2 | hsa-miR-7231-5p  |
| AGO2 | hsa-miR-4635     |
| AGO2 | hsa-miR-8824     |
| AGO2 | hsa-miR-5107-3p  |
| AGO2 | hsa-miR-2470     |
| AGO2 | hsa-miR-3067-5p  |
| AGO2 | hsa-miR-7192-5p  |
| AGO2 | hsa-miR-6396     |
| AGO2 | hsa-miR-666-3p   |
| AGO2 | hsa-miR-132-5p   |
| AGO2 | hsa-miR-1456-5p  |
| AGO2 | hsa-miR-6826-3p  |
| AGO2 | hsa-miR-7243-5p  |
| AGO2 | hsa-miR-7277-5p  |
| AGO2 | hsa-miR-6357     |
| AGO2 | hsa-miR-660-5p   |
| AGO2 | hsa-miR-7083-5p  |
| AGO2 | hsa-miR-20a-5p   |
| AGO2 | hsa-miR-548ah-3p |
| AGO2 | hsa-miR-376a-3p  |
| AGO2 | hsa-miR-5692bc   |
| AGO2 | hsa-miR-6947-3p  |
| AGO2 | hsa-miR-6809-3p  |
| AGO2 | hsa-miR-6778-3p  |
| AGO2 | hsa-miR-7284-3p  |
| AGO2 | hsa-miR-651-3p   |
| AGO2 | hsa-miR-7386f-3p |
| AGO2 | hsa-miR-7220-3p  |
| AGO2 | hsa-miR-608      |
| AGO2 | hsa-miR-7453-5p  |
| AGO2 | hsa-miR-145-3p   |
| AGO2 | hsa-miR-3084-3p  |
| AGO2 | hsa-miR-2284-5p  |
| AGO2 | hsa-miR-7168-5p  |
| AGO2 | hsa-miR-5113     |
| AGO2 | hsa-miR-1841     |

|      |                   |
|------|-------------------|
| AGO2 | hsa-miR-409-3p    |
| AGO2 | hsa-miR-6989-3p   |
| AGO2 | hsa-miR-6831-5p   |
| AGO2 | hsa-miR-551       |
| AGO2 | hsa-let-7ac-3p    |
| AGO2 | hsa-miR-1237-5p   |
| AGO2 | hsa-miR-4716-5p   |
| AGO2 | hsa-miR-3059-5p   |
| AGO2 | hsa-miR-4700-5p   |
| AGO2 | hsa-miR-3525      |
| AGO2 | hsa-miR-2407      |
| AGO2 | hsa-miR-323b-5p   |
| AGO2 | hsa-miR-3664-5p   |
| AGO2 | hsa-miR-3619-5p   |
| AGO2 | hsa-miR-184       |
| AGO2 | hsa-miR-203-3p    |
| AGO2 | hsa-miR-6798-5p   |
| AGO2 | hsa-miR-770-3p    |
| AGO2 | hsa-miR-466f      |
| AGO2 | hsa-miR-2136      |
| AGO2 | hsa-miR-3659      |
| AGO2 | hsa-miR-5589-5p   |
| AGO2 | hsa-miR-6391      |
| AGO2 | hsa-miR-6955-3p   |
| AGO2 | hsa-miR-154c      |
| AGO2 | hsa-miR-466b-4-3p |
| AGO2 | hsa-miR-6877-3p   |
| AGO2 | hsa-miR-1470      |
| AGO2 | hsa-miR-183-5p    |
| AGO2 | hsa-miR-1981-5p   |
| AGO2 | hsa-miR-206-3p    |
| AGO2 | hsa-miR-6868-5p   |
| AGO2 | hsa-miR-6414      |
| AGO2 | hsa-let-7b-5p     |
| AGO2 | hsa-miR-548d-5p   |
| AGO2 | hsa-miR-2388-3p   |
| AGO2 | hsa-miR-2310      |
| AGO2 | hsa-miR-1968-5p   |
| AGO2 | hsa-miR-7009-3p   |
| AGO2 | hsa-miR-216b-3p   |
| AGO2 | hsa-miR-181-5p    |
| AGO2 | hsa-miR-4726-3p   |
| AGO2 | hsa-miR-6578-5p   |
| AGO2 | hsa-miR-673-5p    |
| AGO2 | hsa-miR-5585-3p   |
| AGO2 | hsa-miR-4473      |

|      |                  |
|------|------------------|
| AGO2 | hsa-miR-300-3p   |
| AGO2 | hsa-miR-4425     |
| AGO2 | hsa-miR-7289-3p  |
| AGO2 | hsa-miR-1953     |
| AGO2 | hsa-miR-325-3p   |
| AGO2 | hsa-miR-1764-5p  |
| AGO2 | hsa-miR-559      |
| AGO2 | hsa-miR-6984-5p  |
| AGO2 | hsa-miR-6680-3p  |
| AGO2 | hsa-miR-1304-5p  |
| AGO2 | hsa-miR-2450bd   |
| AGO2 | hsa-miR-7021-3p  |
| AGO2 | hsa-miR-7371g-5p |
| AGO2 | hsa-miR-7386h-3p |
| AGO2 | hsa-miR-124-3p   |
| AGO2 | hsa-miR-6791-3p  |
| AGO2 | hsa-miR-8873a    |
| AGO2 | hsa-miR-196-5p   |
| AGO2 | hsa-miR-4743-5p  |
| AGO2 | hsa-miR-7027-5p  |
| AGO2 | hsa-miR-589-5p   |
| AGO2 | hsa-miR-7482-3p  |
| AGO2 | hsa-miR-3578     |
| AGO2 | hsa-miR-6127     |
| AGO2 | hsa-miR-7109-3p  |
| AGO2 | hsa-miR-669i     |
| AGO2 | hsa-miR-3112-5p  |
| AGO2 | hsa-miR-6906-5p  |
| AGO2 | hsa-miR-2400     |
| AGO2 | hsa-miR-2347     |
| AGO2 | hsa-miR-7232-5p  |
| AGO2 | hsa-miR-505-3p.1 |
| AGO2 | hsa-miR-1231     |
| AGO2 | hsa-miR-3913-5p  |
| AGO2 | hsa-miR-323b-3p  |
| AGO2 | hsa-miR-3556a    |
| AGO2 | hsa-miR-124      |
| AGO2 | hsa-miR-1972     |
| AGO2 | hsa-miR-605      |
| AGO2 | hsa-miR-149-3p   |
| AGO2 | hsa-miR-338-3p   |
| AGO2 | hsa-miR-7207-3p  |
| AGO2 | hsa-miR-5587-5p  |
| AGO2 | hsa-miR-4662a-3p |
| AGO2 | hsa-miR-580-3p   |
| AGO2 | hsa-miR-4504     |

|      |                  |
|------|------------------|
| AGO2 | hsa-miR-6766-5p  |
| AGO2 | hsa-miR-6529-5p  |
| AGO2 | hsa-miR-3968     |
| AGO2 | hsa-miR-4758-3p  |
| AGO2 | hsa-miR-450a     |
| AGO2 | hsa-miR-421-5p   |
| AGO2 | hsa-miR-7323-3p  |
| AGO2 | hsa-miR-6779-3p  |
| AGO2 | hsa-miR-548as-3p |
| AGO2 | hsa-miR-7686-5p  |
| AGO2 | hsa-miR-5624-5p  |
| AGO2 | hsa-miR-2681-5p  |
| AGO2 | hsa-miR-7335-3p  |
| AGO2 | hsa-miR-424-5p   |
| AGO2 | hsa-miR-154a     |
| AGO2 | hsa-miR-665      |
| AGO2 | hsa-miR-3680-3p  |
| AGO2 | hsa-miR-6783-5p  |
| AGO2 | hsa-miR-144-3p   |
| AGO2 | hsa-miR-449a-3p  |
| AGO2 | hsa-miR-8069     |
| AGO2 | hsa-miR-130ac-5p |
| AGO2 | hsa-miR-7688-3p  |
| AGO2 | hsa-miR-6893-5p  |
| AGO2 | hsa-miR-429      |
| AGO2 | hsa-miR-134-5p   |
| AGO2 | hsa-miR-93-5p    |
| AGO2 | hsa-miR-5007-5p  |
| AGO2 | hsa-miR-548ay-5p |
| AGO2 | hsa-miR-23b-3p   |
| AGO2 | hsa-miR-7481-5p  |
| AGO2 | hsa-miR-4283     |
| AGO2 | hsa-miR-1564-5p  |
| AGO2 | hsa-miR-2292     |
| AGO2 | hsa-miR-6958-3p  |
| AGO2 | hsa-miR-204-3p   |
| AGO2 | hsa-let-7g-5p    |
| AGO2 | hsa-miR-7398l-3p |
| AGO2 | hsa-miR-1712-3p  |
| AGO2 | hsa-miR-4749-3p  |
| AGO2 | hsa-miR-4529-5p  |
| AGO2 | hsa-miR-501-5p   |
| AGO2 | hsa-let-7d-3p    |
| AGO2 | hsa-miR-1388-3p  |
| AGO2 | hsa-miR-1812-5p  |
| AGO2 | hsa-miR-2303     |



|      |                  |
|------|------------------|
| AGO2 | hsa-miR-1929-3p  |
| AGO2 | hsa-miR-4305     |
| AGO2 | hsa-miR-190-3p   |
| AGO2 | hsa-miR-3926     |
| AGO2 | hsa-miR-6878-5p  |
| AGO2 | hsa-miR-892b     |
| AGO2 | hsa-miR-7348-5p  |
| AGO2 | hsa-miR-130a-5p  |
| AGO2 | hsa-miR-1250     |
| AGO2 | hsa-miR-8803     |
| AGO2 | hsa-miR-4253     |
| AGO2 | hsa-miR-6870-3p  |
| AGO2 | hsa-miR-151a-3p  |
| AGO2 | hsa-miR-943      |
| AGO2 | hsa-miR-3089-3p  |
| AGO2 | hsa-miR-1913     |
| AGO2 | hsa-miR-8869     |
| AGO2 | hsa-miR-301b-5p  |
| AGO2 | hsa-miR-423-5p   |
| AGO2 | hsa-miR-1224-3p  |
| AGO2 | hsa-miR-4649-3p  |
| AGO2 | hsa-miR-6746-5p  |
| AGO2 | hsa-miR-7398p-3p |
| AGO2 | hsa-miR-6992-3p  |
| AGO2 | hsa-miR-1260b    |
| AGO2 | hsa-miR-4794     |
| AGO2 | hsa-miR-7195-5p  |
| AGO2 | hsa-miR-1298-5p  |
| AGO2 | hsa-miR-741-3p   |
| AGO2 | hsa-miR-6986-5p  |
| AGO2 | hsa-miR-2882     |
| AGO2 | hsa-miR-4433b-5p |
| AGO2 | hsa-miR-883ab-3p |
| AGO2 | hsa-miR-375-3p   |
| AGO2 | hsa-miR-450a-3p  |
| AGO2 | hsa-miR-4717-3p  |
| AGO2 | hsa-miR-7045-3p  |
| AGO2 | hsa-miR-103-5p   |
| AGO2 | hsa-miR-6811-3p  |
| AGO2 | hsa-miR-3162-5p  |
| AGO2 | hsa-miR-6801-3p  |
| AGO2 | hsa-miR-7193-5p  |
| AGO2 | hsa-miR-2335     |
| AGO2 | hsa-miR-6509-5p  |
| AGO2 | hsa-miR-342-5p   |
| AGO2 | hsa-miR-7865     |

|      |                  |
|------|------------------|
| AGO2 | hsa-miR-548at-3p |
| AGO2 | hsa-miR-1597-5p  |
| AGO2 | hsa-miR-570-3p   |
| AGO2 | hsa-miR-1188-3p  |
| AGO2 | hsa-miR-2114-5p  |
| AGO2 | hsa-miR-1233-3p  |
| AGO2 | hsa-miR-1595-5p  |
| AGO2 | hsa-miR-1663-5p  |
| AGO2 | hsa-miR-1661     |
| AGO2 | hsa-miR-1915-5p  |
| AGO2 | hsa-miR-1208     |
| AGO2 | hsa-miR-6896-3p  |
| AGO2 | hsa-miR-331-5p   |
| AGO2 | hsa-miR-551b-3p  |
| AGO2 | hsa-miR-1279     |
| AGO2 | hsa-miR-5132-5p  |
| AGO2 | hsa-miR-508a     |
| AGO2 | hsa-miR-2459     |
| AGO2 | hsa-miR-4722-5p  |
| AGO2 | hsa-miR-5680     |
| AGO2 | hsa-miR-1796     |
| AGO2 | hsa-miR-5580-5p  |
| AGO2 | hsa-miR-8082     |
| AGO2 | hsa-let-7f-5p    |
| AGO2 | hsa-miR-4633-5p  |
| AGO2 | hsa-miR-6509-3p  |
| AGO2 | hsa-miR-5627-3p  |
| AGO2 | hsa-miR-7650-3p  |
| AGO2 | hsa-miR-673-3p   |
| AGO2 | hsa-miR-6761-5p  |
| AGO2 | hsa-miR-6771-3p  |
| AGO2 | hsa-miR-1909-3p  |
| AGO2 | hsa-miR-7190-5p  |
| AGO2 | hsa-miR-6842-3p  |
| AGO2 | hsa-miR-1256     |
| AGO2 | hsa-miR-4256     |
| AGO2 | hsa-miR-302a-3p  |
| AGO2 | hsa-miR-6941-5p  |
| AGO2 | hsa-miR-7047-5p  |
| AGO2 | hsa-miR-7301-5p  |
| AGO2 | hsa-miR-3674     |
| AGO2 | hsa-miR-195-5p   |
| AGO2 | hsa-miR-7663-3p  |
| AGO2 | hsa-miR-7158-5p  |
| AGO2 | hsa-miR-427      |
| AGO2 | hsa-miR-7371f-5p |

|      |                  |
|------|------------------|
| AGO2 | hsa-miR-628-5p   |
| AGO2 | hsa-miR-6728-3p  |
| AGO2 | hsa-miR-3536     |
| AGO2 | hsa-miR-7386e-3p |
| AGO2 | hsa-miR-6821-3p  |
| AGO2 | hsa-miR-680      |
| AGO2 | hsa-miR-3470a    |
| AGO2 | hsa-miR-4690-3p  |
| AGO2 | hsa-miR-6928-5p  |
| AGO2 | hsa-miR-4645-3p  |
| AGO2 | hsa-miR-7398-3p  |
| AGO2 | hsa-miR-6932-3p  |
| AGO2 | hsa-miR-654-5p   |
| AGO2 | hsa-miR-7447-3p  |
| AGO2 | hsa-miR-6314     |
| AGO2 | hsa-miR-7068-3p  |
| AGO2 | hsa-miR-3580-3p  |
| AGO2 | hsa-miR-6522     |
| AGO2 | hsa-miR-7059-3p  |
| AGO2 | hsa-miR-585-5p   |
| AGO2 | hsa-miR-2462     |
| AGO2 | hsa-miR-291b-3p  |
| AGO2 | hsa-miR-1197-5p  |
| AGO2 | hsa-miR-3199     |
| AGO2 | hsa-miR-6828-5p  |
| AGO2 | hsa-miR-4710     |
| AGO2 | hsa-miR-1546-5p  |
| AGO2 | hsa-miR-2332     |
| AGO2 | hsa-miR-939-5p   |
| AGO2 | hsa-miR-7003-3p  |
| AGO2 | hsa-miR-2885     |
| AGO2 | hsa-miR-520a-3p  |
| AGO2 | hsa-miR-1273g-5p |
| AGO2 | hsa-miR-1564-3p  |
| AGO2 | hsa-miR-7025-3p  |
| AGO2 | hsa-miR-8810     |
| AGO2 | hsa-miR-299a-5p  |
| AGO2 | hsa-miR-3667-3p  |
| AGO2 | hsa-miR-1305     |
| AGO2 | hsa-miR-661      |
| AGO2 | hsa-miR-466f-3p  |
| AGO2 | hsa-miR-6625-5p  |
| AGO2 | hsa-miR-4709-3p  |
| AGO2 | hsa-miR-589-3p   |
| AGO2 | hsa-miR-33-3p    |
| AGO2 | hsa-miR-2376     |

|      |                   |
|------|-------------------|
| AGO2 | hsa-miR-1745      |
| AGO2 | hsa-miR-3965      |
| AGO2 | hsa-miR-1774      |
| AGO2 | hsa-miR-3613b     |
| AGO2 | hsa-miR-2362      |
| AGO2 | hsa-miR-2861      |
| AGO2 | hsa-miR-34b-5p    |
| AGO2 | hsa-miR-380       |
| AGO2 | hsa-miR-6523b     |
| AGO2 | hsa-miR-6765-5p   |
| AGO2 | hsa-miR-6656-5p   |
| AGO2 | hsa-miR-3973      |
| AGO2 | hsa-miR-187-3p    |
| AGO2 | hsa-miR-2315      |
| AGO2 | hsa-miR-6685-5p   |
| AGO2 | hsa-miR-2464-3p   |
| AGO2 | hsa-miR-493-3p    |
| AGO2 | hsa-miR-5739      |
| AGO2 | hsa-miR-7234-5p   |
| AGO2 | hsa-miR-3068-3p   |
| AGO2 | hsa-miR-1948-3p   |
| AGO2 | hsa-miR-8817      |
| AGO2 | hsa-miR-195-3p    |
| AGO2 | hsa-miR-595       |
| AGO2 | hsa-miR-767       |
| AGO2 | hsa-miR-6519      |
| AGO2 | hsa-miR-5010-3p   |
| AGO2 | hsa-miR-450a-2-3p |
| AGO2 | hsa-miR-539-5p    |
| AGO2 | hsa-miR-1273d     |
| AGO2 | hsa-miR-3591      |
| AGO2 | hsa-miR-490-3p    |
| AGO2 | hsa-miR-6998-5p   |
| AGO2 | hsa-miR-7208-3p   |
| AGO2 | hsa-miR-485-5p    |
| AGO2 | hsa-miR-7656-5p   |
| AGO2 | hsa-miR-299       |
| AGO2 | hsa-miR-128-3p    |
| AGO2 | hsa-miR-7207-5p   |
| AGO2 | hsa-miR-93-3p     |
| AGO2 | hsa-miR-491-5p    |
| AGO2 | hsa-miR-8875      |
| AGO2 | hsa-miR-6906-3p   |
| AGO2 | hsa-miR-6073      |
| AGO2 | hsa-miR-510-3p    |
| AGO2 | hsa-miR-4646-5p   |

|      |                  |
|------|------------------|
| AGO2 | hsa-miR-1555-5p  |
| AGO2 | hsa-miR-8863     |
| AGO2 | hsa-miR-190a-3p  |
| AGO2 | hsa-miR-7050-3p  |
| AGO2 | hsa-miR-891b     |
| AGO2 | hsa-miR-1911-3p  |
| AGO2 | hsa-miR-4720-3p  |
| AGO2 | hsa-miR-625-5p   |
| AGO2 | hsa-miR-378d     |
| AGO2 | hsa-miR-1284     |
| AGO2 | hsa-miR-7048-5p  |
| AGO2 | hsa-miR-670      |
| AGO2 | hsa-miR-7669-5p  |
| AGO2 | hsa-miR-369-3p   |
| AGO2 | hsa-miR-216a-3p  |
| AGO2 | hsa-miR-3189-5p  |
| AGO2 | hsa-miR-6745     |
| AGO2 | hsa-miR-451b     |
| AGO2 | hsa-miR-7386j-5p |
| AGO2 | hsa-miR-8791     |
| AGO2 | hsa-miR-3588     |
| AGO2 | hsa-miR-329      |
| AGO2 | hsa-miR-6596-3p  |
| AGO2 | hsa-miR-548ad-5p |
| AGO2 | hsa-miR-518d-5p  |
| AGO2 | hsa-miR-548ae-3p |
| AGO2 | hsa-miR-3910     |
| AGO2 | hsa-miR-152-5p   |
| AGO2 | hsa-miR-448-3p   |
| AGO2 | hsa-miR-29a-3p   |
| AGO2 | hsa-miR-200bc-3p |
| AGO2 | hsa-miR-1677-3p  |
| AGO2 | hsa-miR-15a-3p   |
| AGO2 | hsa-miR-6329     |
| AGO2 | hsa-miR-2405     |
| AGO2 | hsa-miR-202-3p   |
| AGO2 | hsa-miR-4452     |
| AGO2 | hsa-miR-3082-3p  |
| AGO2 | hsa-miR-669c-3p  |
| AGO2 | hsa-miR-4420     |
| AGO2 | hsa-miR-646      |
| AGO2 | hsa-miR-548w     |
| AGO2 | hsa-miR-6627-3p  |
| AGO2 | hsa-miR-552      |
| AGO2 | hsa-miR-411-5p.2 |
| AGO2 | hsa-miR-6815-5p  |

|      |                   |
|------|-------------------|
| AGO2 | hsa-miR-1976      |
| AGO2 | hsa-miR-1912      |
| AGO2 | hsa-miR-329-3p    |
| AGO2 | hsa-miR-6825-5p   |
| AGO2 | hsa-miR-203       |
| AGO2 | hsa-miR-8852      |
| AGO2 | hsa-miR-106-5p    |
| AGO2 | hsa-miR-5626-3p   |
| AGO2 | hsa-miR-181a-2-3p |
| AGO2 | hsa-miR-4459      |
| AGO2 | hsa-miR-7197-3p   |
| AGO2 | hsa-miR-7302-3p   |
| AGO2 | hsa-miR-219-3p    |
| AGO2 | hsa-miR-295-3p    |
| AGO2 | hsa-miR-7079-3p   |
| AGO2 | hsa-miR-6839-5p   |
| AGO2 | hsa-miR-18        |
| AGO2 | hsa-miR-664a-3p   |
| AGO2 | hsa-miR-7075-5p   |
| AGO2 | hsa-miR-6817-5p   |
| AGO2 | hsa-miR-1933-5p   |
| AGO2 | hsa-miR-3079-3p   |
| AGO2 | hsa-miR-3185      |
| AGO2 | hsa-miR-607       |
| AGO2 | hsa-miR-7294-5p   |
| AGO2 | hsa-miR-548u      |
| AGO2 | hsa-miR-548ae-5p  |
| AGO2 | hsa-miR-6729-5p   |
| AGO2 | hsa-miR-8847      |
| AGO2 | hsa-miR-4723-5p   |
| AGO2 | hsa-miR-4279      |
| AGO2 | hsa-miR-328-3p    |
| AGO2 | hsa-miR-8874      |
| AGO2 | hsa-miR-7253-5p   |
| AGO2 | hsa-miR-6777-5p   |
| AGO2 | hsa-miR-7286-5p   |
| AGO2 | hsa-miR-3106-3p   |
| AGO2 | hsa-miR-6981-3p   |
| AGO2 | hsa-miR-6375      |
| AGO2 | hsa-miR-1551-3p   |
| AGO2 | hsa-miR-3573-5p   |
| AGO2 | hsa-miR-8120      |
| AGO2 | hsa-miR-376e      |
| AGO2 | hsa-miR-1285-3p   |
| AGO2 | hsa-miR-1717      |
| AGO2 | hsa-miR-7383-5p   |

|      |                  |
|------|------------------|
| AGO2 | hsa-miR-4489     |
| AGO2 | hsa-miR-5707     |
| AGO2 | hsa-miR-29e      |
| AGO2 | hsa-miR-8895     |
| AGO2 | hsa-miR-410-3p   |
| AGO2 | hsa-miR-7680-5p  |
| AGO2 | hsa-miR-292b-5p  |
| AGO2 | hsa-miR-3078-5p  |
| AGO2 | hsa-miR-3619-3p  |
| AGO2 | hsa-miR-2888     |
| AGO2 | hsa-miR-200b-3p  |
| AGO2 | hsa-miR-1963     |
| AGO2 | hsa-miR-4520-5p  |
| AGO2 | hsa-miR-6533     |
| AGO2 | hsa-miR-6902-3p  |
| AGO2 | hsa-miR-139-5p   |
| AGO2 | hsa-miR-3524-3p  |
| AGO2 | hsa-miR-7185-5p  |
| AGO2 | hsa-miR-365a-3p  |
| AGO2 | hsa-miR-2286     |
| AGO2 | hsa-miR-7296-5p  |
| AGO2 | hsa-miR-544-3p   |
| AGO2 | hsa-miR-7279-3p  |
| AGO2 | hsa-miR-335-5p   |
| AGO2 | hsa-miR-2444     |
| AGO2 | hsa-miR-3925-5p  |
| AGO2 | hsa-miR-616-3p   |
| AGO2 | hsa-miR-3613-3p  |
| AGO2 | hsa-miR-6808-3p  |
| AGO2 | hsa-miR-1658-3p  |
| AGO2 | hsa-miR-599-5p   |
| AGO2 | hsa-miR-7272-3p  |
| AGO2 | hsa-miR-7221-5p  |
| AGO2 | hsa-miR-3156-3p  |
| AGO2 | hsa-miR-7446-5p  |
| AGO2 | hsa-miR-3664-3p  |
| AGO2 | hsa-miR-548am-5p |
| AGO2 | hsa-miR-376ab-3p |
| AGO2 | hsa-miR-7110-5p  |
| AGO2 | hsa-miR-5192     |
| AGO2 | hsa-miR-6701-3p  |
| AGO2 | hsa-miR-6868-3p  |
| AGO2 | hsa-miR-383-5p.2 |
| AGO2 | hsa-miR-7381-3p  |
| AGO2 | hsa-miR-201-3p   |
| AGO2 | hsa-miR-548aq-3p |

|      |                  |
|------|------------------|
| AGO2 | hsa-miR-7668-3p  |
| AGO2 | hsa-miR-4800-5p  |
| AGO2 | hsa-miR-6575-3p  |
| AGO2 | hsa-miR-7377-5p  |
| AGO2 | hsa-miR-8905     |
| AGO2 | hsa-miR-7092-3p  |
| AGO2 | hsa-miR-4494     |
| AGO2 | hsa-miR-8060     |
| AGO2 | hsa-miR-124a-5p  |
| AGO2 | hsa-miR-7278-5p  |
| AGO2 | hsa-miR-873-5p.1 |
| AGO2 | hsa-miR-7106-3p  |
| AGO2 | hsa-miR-1343-5p  |
| AGO2 | hsa-miR-1593     |
| AGO2 | hsa-miR-514a-3p  |
| AGO2 | hsa-miR-6737-3p  |
| AGO2 | hsa-miR-7070-5p  |
| AGO2 | hsa-miR-19a-3p   |
| AGO2 | hsa-miR-6649-5p  |
| AGO2 | hsa-miR-6962-5p  |
| AGO2 | hsa-miR-6531     |
| AGO2 | hsa-miR-1646     |
| AGO2 | hsa-miR-3575     |
| AGO2 | hsa-miR-7364-5p  |
| AGO2 | hsa-miR-7067-5p  |
| AGO2 | hsa-miR-3539     |
| AGO2 | hsa-miR-7056-5p  |
| AGO2 | hsa-miR-350      |
| AGO2 | hsa-miR-875-3p   |
| AGO2 | hsa-miR-6631-5p  |
| AGO2 | hsa-miR-7301-3p  |
| AGO2 | hsa-miR-454      |
| AGO2 | hsa-miR-1250-5p  |
| AGO2 | hsa-miR-301b-3p  |
| AGO2 | hsa-miR-6663-5p  |
| AGO2 | hsa-miR-1229-3p  |
| AGO2 | hsa-miR-3120-5p  |
| AGO2 | hsa-miR-4519     |
| AGO2 | hsa-miR-129-5p   |
| AGO2 | hsa-miR-3473f    |
| AGO2 | hsa-miR-204-5p   |
| AGO2 | hsa-miR-5197-5p  |
| AGO2 | hsa-miR-326-3p   |
| AGO2 | hsa-miR-6518     |
| AGO2 | hsa-miR-2422     |
| AGO2 | hsa-miR-576-3p   |



|      |                  |
|------|------------------|
| AGO2 | hsa-miR-4427     |
| AGO2 | hsa-miR-20b-5p   |
| AGO2 | hsa-miR-548ag    |
| AGO2 | hsa-miR-4441     |
| AGO2 | hsa-miR-570-3p   |
| AGO2 | hsa-miR-3102-5p  |
| AGO2 | hsa-miR-92a-3p   |
| AGO2 | hsa-miR-7665-5p  |
| AGO2 | hsa-miR-655      |
| AGO2 | hsa-miR-1397-5p  |
| AGO2 | hsa-miR-8853     |
| AGO2 | hsa-miR-208-5p   |
| AGO2 | hsa-miR-1454     |
| AGO2 | hsa-miR-146-5p   |
| AGO2 | hsa-miR-7015-3p  |
| AGO2 | hsa-miR-1231-3p  |
| AGO2 | hsa-miR-4792     |
| AGO2 | hsa-miR-6939-5p  |
| AGO2 | hsa-miR-7371j-5p |
| AGO2 | hsa-miR-295-5p   |
| AGO2 | hsa-miR-520g-3p  |
| AGO2 | hsa-miR-6715a-3p |
| AGO2 | hsa-miR-579      |
| AGO2 | hsa-miR-2383     |
| AGO2 | hsa-miR-1641     |
| AGO2 | hsa-miR-3915     |
| AGO2 | hsa-miR-145-5p   |
| AGO2 | hsa-miR-302-3p   |
| AGO2 | hsa-miR-2331-3p  |
| AGO2 | hsa-miR-6500-5p  |
| AGO2 | hsa-miR-3109-3p  |
| AGO2 | hsa-miR-5709-3p  |
| AGO2 | hsa-miR-3117-3p  |
| AGO2 | hsa-miR-4290     |
| AGO2 | hsa-miR-7026-3p  |
| AGO2 | hsa-miR-362-3p   |
| AGO2 | hsa-miR-7072-5p  |
| AGO2 | hsa-miR-1809     |
| AGO2 | hsa-miR-8802     |
| AGO2 | hsa-miR-217-5p   |
| AGO2 | hsa-miR-216a     |
| AGO2 | hsa-miR-29b-3p   |
| AGO2 | hsa-miR-7241-5p  |
| AGO2 | hsa-miR-342-3p   |
| AGO2 | hsa-miR-181d-3p  |
| AGO2 | hsa-miR-3682-5p  |

|      |                   |
|------|-------------------|
| AGO2 | hsa-miR-29c-5p    |
| AGO2 | hsa-miR-7072-3p   |
| AGO2 | hsa-miR-320e      |
| AGO2 | hsa-miR-2365      |
| AGO2 | hsa-miR-4754      |
| AGO2 | hsa-miR-302c-3p.2 |
| AGO2 | hsa-miR-552-3p    |
| AGO2 | hsa-miR-3061-5p   |
| AGO2 | hsa-miR-15c-3p    |
| AGO2 | hsa-miR-2302      |
| AGO2 | hsa-miR-2285s     |
| AGO2 | hsa-miR-7184-3p   |
| AGO2 | hsa-miR-3658      |
| AGO2 | hsa-miR-3596b     |
| AGO2 | hsa-miR-130c-5p   |
| AGO2 | hsa-miR-339-5p    |
| AGO2 | hsa-miR-2284ab    |
| AGO2 | hsa-miR-6904-5p   |
| AGO2 | hsa-miR-2327      |
| AGO2 | hsa-miR-6846-3p   |
| AGO2 | hsa-miR-3145-5p   |
| AGO2 | hsa-miR-377-3p    |
| AGO2 | hsa-miR-8826      |
| AGO2 | hsa-miR-878       |
| AGO2 | hsa-miR-548f-3p   |
| AGO2 | hsa-miR-3530-5p   |
| AGO2 | hsa-miR-100-5p    |
| AGO2 | hsa-miR-1934-3p   |
| AGO2 | hsa-miR-548aef    |
| AGO2 | hsa-miR-6917-5p   |
| AGO2 | hsa-miR-361-5p    |
| AGO2 | hsa-miR-581       |
| AGO2 | hsa-miR-548ar-5p  |
| AGO2 | hsa-miR-8880      |
| AGO2 | hsa-miR-3148      |
| AGO2 | hsa-miR-7679-3p   |
| AGO2 | hsa-miR-6726-5p   |
| AGO2 | hsa-miR-7079-5p   |
| AGO2 | hsa-miR-4260      |
| AGO2 | hsa-miR-3058-3p   |
| AGO2 | hsa-miR-7678-5p   |
| AGO2 | hsa-miR-3110-5p   |
| AGO2 | hsa-miR-7480-5p   |
| AGO2 | hsa-miR-301a-3p   |
| AGO2 | hsa-miR-2284r     |
| AGO2 | hsa-miR-302d-5p   |

|      |                   |
|------|-------------------|
| AGO2 | hsa-miR-101a-3p.2 |
| AGO2 | hsa-miR-548t-3p   |
| AGO2 | hsa-miR-7450-5p   |
| AGO2 | hsa-miR-7160-5p   |
| AGO2 | hsa-miR-6741-5p   |
| AGO2 | hsa-miR-6216      |
| AGO2 | hsa-miR-6344      |
| AGO2 | hsa-miR-323-3p    |
| AGO2 | hsa-miR-8114      |
| AGO2 | hsa-miR-4715-5p   |
| AGO2 | hsa-miR-3092-5p   |
| AGO2 | hsa-miR-944       |
| AGO2 | hsa-miR-3544-5p   |
| AGO2 | hsa-miR-378-3p    |
| AGO2 | hsa-miR-6872-3p   |
| AGO2 | hsa-miR-135b-5p   |
| AGO2 | hsa-miR-6804-5p   |
| AGO2 | hsa-miR-6566-3p   |
| AGO2 | hsa-miR-7078-3p   |
| AGO2 | hsa-miR-4786-5p   |
| AGO2 | hsa-miR-1675      |
| AGO2 | hsa-miR-572       |
| AGO2 | hsa-miR-199b-2-5p |
| AGO2 | hsa-miR-27-5p     |
| AGO2 | hsa-miR-7187-3p   |
| AGO2 | hsa-miR-7151-5p   |
| AGO2 | hsa-miR-1388-5p   |
| AGO2 | hsa-miR-6900-3p   |
| AGO2 | hsa-miR-6398      |
| AGO2 | hsa-miR-6597-3p   |
| AGO2 | hsa-miR-8804      |
| AGO2 | hsa-miR-6823-5p   |
| AGO2 | hsa-miR-1948-5p   |
| AGO2 | hsa-miR-6779-5p   |
| AGO2 | hsa-miR-301a-5p   |
| AGO2 | hsa-miR-1262      |
| AGO2 | hsa-miR-619-3p    |
| AGO2 | hsa-miR-195-5p    |
| AGO2 | hsa-miR-3151-5p   |
| AGO2 | hsa-miR-6562-5p   |
| AGO2 | hsa-miR-7285-3p   |
| AGO2 | hsa-miR-4785      |
| AGO2 | hsa-miR-4724-5p   |
| AGO2 | hsa-miR-192-5p    |
| AGO2 | hsa-miR-6798-3p   |
| AGO2 | hsa-miR-625-3p    |

|      |                   |
|------|-------------------|
| AGO2 | hsa-miR-664a-5p   |
| AGO2 | hsa-miR-7386m-3p  |
| AGO2 | hsa-miR-1837      |
| AGO2 | hsa-miR-6781-5p   |
| AGO2 | hsa-miR-7444-5p   |
| AGO2 | hsa-miR-126-3p    |
| AGO2 | hsa-miR-6943-3p   |
| AGO2 | hsa-miR-7224-3p   |
| AGO2 | hsa-miR-1287-5p   |
| AGO2 | hsa-miR-504-5p.1  |
| AGO2 | hsa-miR-489-5p    |
| AGO2 | hsa-miR-2361      |
| AGO2 | hsa-miR-7065-5p   |
| AGO2 | hsa-miR-4748      |
| AGO2 | hsa-miR-4769-5p   |
| AGO2 | hsa-miR-7397-5p   |
| AGO2 | hsa-miR-518a-5p   |
| AGO2 | hsa-miR-367-3p    |
| AGO2 | hsa-miR-3069-5p   |
| AGO2 | hsa-miR-1969      |
| AGO2 | hsa-miR-7975      |
| AGO2 | hsa-miR-679       |
| AGO2 | hsa-miR-2284j     |
| AGO2 | hsa-miR-1299      |
| AGO2 | hsa-miR-7676-5p   |
| AGO2 | hsa-miR-206-5p    |
| AGO2 | hsa-miR-937-5p    |
| AGO2 | hsa-miR-125a-3p   |
| AGO2 | hsa-miR-2486-5p   |
| AGO2 | hsa-miR-1771      |
| AGO2 | hsa-miR-548t-5p   |
| AGO2 | hsa-miR-3653-3p   |
| AGO2 | hsa-miR-6732-3p   |
| AGO2 | hsa-miR-2115-5p   |
| AGO2 | hsa-miR-198       |
| AGO2 | hsa-miR-1246      |
| AGO2 | hsa-miR-8094      |
| AGO2 | hsa-miR-3543      |
| AGO2 | hsa-miR-6556-5p   |
| AGO2 | hsa-miR-30b-3p    |
| AGO2 | hsa-miR-4327      |
| AGO2 | hsa-miR-4653-5p   |
| AGO2 | hsa-miR-466b-2-3p |
| AGO2 | hsa-miR-219-5p    |
| AGO2 | hsa-miR-3591-5p   |
| AGO2 | hsa-miR-2285r     |

|      |                  |
|------|------------------|
| AGO2 | hsa-miR-8868     |
| AGO2 | hsa-miR-4643     |
| AGO2 | hsa-miR-4687-5p  |
| AGO2 | hsa-miR-3173-3p  |
| AGO2 | hsa-miR-619      |
| AGO2 | hsa-miR-3978     |
| AGO2 | hsa-miR-5134-5p  |
| AGO2 | hsa-miR-8862     |
| AGO2 | hsa-miR-30--3p   |
| AGO2 | hsa-miR-3592     |
| AGO2 | hsa-miR-1251-3p  |
| AGO2 | hsa-miR-30-3p    |
| AGO2 | hsa-miR-1231-5p  |
| AGO2 | hsa-miR-7388a-5p |
| AGO2 | hsa-miR-1453     |
| AGO2 | hsa-miR-1255b-5p |
| AGO2 | hsa-let-7c-3p    |
| AGO2 | hsa-miR-588      |
| AGO2 | hsa-miR-4638-3p  |
| AGO2 | hsa-miR-4310     |
| AGO2 | hsa-miR-33-5p    |
| AGO2 | hsa-miR-3657     |
| AGO2 | hsa-miR-7646-5p  |
| AGO2 | hsa-miR-6734-3p  |
| AGO2 | hsa-miR-7659-3p  |
| AGO2 | hsa-miR-1981-3p  |
| AGO2 | hsa-miR-5135     |
| AGO2 | hsa-miR-4691-3p  |
| AGO2 | hsa-miR-548ad-3p |
| AGO2 | hsa-miR-4457     |
| AGO2 | hsa-miR-7685-5p  |
| AGO2 | hsa-miR-4516     |
| AGO2 | hsa-miR-338-5p   |
| AGO2 | hsa-miR-302e     |
| AGO2 | hsa-miR-1323-3p  |
| AGO2 | hsa-miR-3616-5p  |
| AGO2 | hsa-miR-7704     |
| AGO2 | hsa-miR-6408     |
| AGO2 | hsa-miR-1250-3p  |
| AGO2 | hsa-miR-7245-3p  |
| AGO2 | hsa-miR-4266     |
| AGO2 | hsa-miR-650abc   |
| AGO2 | hsa-miR-23a-3p   |
| AGO2 | hsa-miR-8831     |
| AGO2 | hsa-miR-1681     |
| AGO2 | hsa-miR-6758-3p  |

|      |                  |
|------|------------------|
| AGO2 | hsa-miR-2285aa   |
| AGO2 | hsa-miR-6572-3p  |
| AGO2 | hsa-miR-6837-5p  |
| AGO2 | hsa-miR-29       |
| AGO2 | hsa-miR-215-3p   |
| AGO2 | hsa-miR-1185-5p  |
| AGO2 | hsa-miR-1947-5p  |
| AGO2 | hsa-miR-1180-5p  |
| AGO2 | hsa-miR-3927-3p  |
| AGO2 | hsa-miR-4540     |
| AGO2 | hsa-miR-1302     |
| AGO2 | hsa-miR-6921-3p  |
| AGO2 | hsa-miR-421-3p   |
| AGO2 | hsa-miR-6859-5p  |
| AGO2 | hsa-miR-8883     |
| AGO2 | hsa-miR-5705     |
| AGO2 | hsa-miR-103      |
| AGO2 | hsa-miR-8843     |
| AGO2 | hsa-miR-3551-3p  |
| AGO2 | hsa-miR-8870     |
| AGO2 | hsa-miR-6780a-5p |
| AGO2 | hsa-miR-5104     |
| AGO2 | hsa-miR-1553-5p  |
| AGO2 | hsa-miR-33       |
| AGO2 | hsa-miR-6215     |
| AGO2 | hsa-miR-548n     |
| AGO2 | hsa-miR-8884     |
| AGO2 | hsa-miR-6804-3p  |
| AGO2 | hsa-miR-543-3p   |
| AGO2 | hsa-miR-514a-5p  |
| AGO2 | hsa-miR-6819-3p  |
| AGO2 | hsa-miR-7316-5p  |
| AGO2 | hsa-miR-380-5p   |
| AGO2 | hsa-miR-2285ad   |
| AGO2 | hsa-miR-4476     |
| AGO2 | hsa-miR-422      |
| AGO2 | hsa-miR-371a-3p  |
| AGO2 | hsa-miR-7199-3p  |
| AGO2 | hsa-miR-4685-5p  |
| AGO2 | hsa-miR-6903-3p  |
| AGO2 | hsa-miR-885-3p   |
| AGO2 | hsa-miR-7371e-5p |
| AGO2 | hsa-miR-383-5p   |
| AGO2 | hsa-miR-4270     |
| AGO2 | hsa-miR-9769-3p  |
| AGO2 | hsa-miR-1736-3p  |

|      |                   |
|------|-------------------|
| AGO2 | hsa-miR-7652-5p   |
| AGO2 | hsa-miR-93-5p     |
| AGO2 | hsa-miR-466f-5p   |
| AGO2 | hsa-miR-7282-3p   |
| AGO2 | hsa-miR-4760-5p   |
| AGO2 | hsa-miR-2368-3p   |
| AGO2 | hsa-miR-5682      |
| AGO2 | hsa-miR-1569      |
| AGO2 | hsa-miR-2446      |
| AGO2 | hsa-miR-7244-5p   |
| AGO2 | hsa-miR-6962-3p   |
| AGO2 | hsa-miR-1804      |
| AGO2 | hsa-miR-7013-5p   |
| AGO2 | hsa-miR-1752      |
| AGO2 | hsa-miR-3531-3p   |
| AGO2 | hsa-miR-1237-3p   |
| AGO2 | hsa-miR-1462-5p   |
| AGO2 | hsa-miR-3190-3p   |
| AGO2 | hsa-miR-4700-3p   |
| AGO2 | hsa-miR-4424      |
| AGO2 | hsa-miR-1964-5p   |
| AGO2 | hsa-miR-1625-3p   |
| AGO2 | hsa-miR-7320-3p   |
| AGO2 | hsa-miR-6607-5p   |
| AGO2 | hsa-miR-4727-5p   |
| AGO2 | hsa-miR-873a-5p.1 |
| AGO2 | hsa-miR-7324-5p   |
| AGO2 | hsa-miR-4668-3p   |
| AGO2 | hsa-miR-664-3p    |
| AGO2 | hsa-miR-6700-3p   |
| AGO2 | hsa-miR-6877-5p   |
| AGO2 | hsa-miR-5701      |
| AGO2 | hsa-miR-3102      |
| AGO2 | hsa-miR-5685      |
| AGO2 | hsa-miR-7398n-5p  |
| AGO2 | hsa-miR-6624-3p   |
| AGO2 | hsa-miR-6132      |
| AGO2 | hsa-miR-7177-5p   |
| AGO2 | hsa-miR-2469      |
| AGO2 | hsa-miR-124-5p    |
| AGO2 | hsa-miR-558       |
| AGO2 | hsa-miR-103a-3p   |
| AGO2 | hsa-miR-548ar-3p  |
| AGO2 | hsa-miR-2425-5p   |
| AGO2 | hsa-miR-29-5p     |
| AGO2 | hsa-miR-4533      |

|      |                  |
|------|------------------|
| AGO2 | hsa-miR-7396-5p  |
| AGO2 | hsa-miR-2377     |
| AGO2 | hsa-miR-5094     |
| AGO2 | hsa-miR-874      |
| AGO2 | hsa-miR-34a-3p   |
| AGO2 | hsa-miR-143-3p   |
| AGO2 | hsa-miR-7019-5p  |
| AGO2 | hsa-miR-329-5p   |
| AGO2 | hsa-miR-449-5p   |
| AGO2 | hsa-miR-7398b-3p |
| AGO2 | hsa-miR-7248-5p  |
| AGO2 | hsa-miR-520f-5p  |
| AGO2 | hsa-miR-8110     |
| AGO2 | hsa-miR-6507-3p  |
| AGO2 | hsa-miR-643      |
| AGO2 | hsa-miR-30a-3p   |
| AGO2 | hsa-miR-28-5p    |
| AGO2 | hsa-miR-95-5p    |
| AGO2 | hsa-miR-1178-5p  |
| AGO2 | hsa-miR-7385e-3p |
| AGO2 | hsa-miR-1545b-3p |
| AGO2 | hsa-miR-1248     |
| AGO2 | hsa-miR-3175     |
| AGO2 | hsa-miR-4660     |
| AGO2 | hsa-miR-1295b-5p |
| AGO2 | hsa-miR-26a-3p   |
| AGO2 | hsa-miR-3944-3p  |
| AGO2 | hsa-miR-7162-5p  |
| AGO2 | hsa-miR-1682     |
| AGO2 | hsa-miR-410      |
| AGO2 | hsa-miR-4667     |
| AGO2 | hsa-miR-7235-3p  |
| AGO2 | hsa-miR-8112     |
| AGO2 | hsa-miR-3689d    |
| AGO2 | hsa-miR-460a-5p  |
| AGO2 | hsa-miR-26-3p    |
| AGO2 | hsa-miR-711      |
| AGO2 | hsa-miR-6918-5p  |
| AGO2 | hsa-miR-7086-5p  |
| AGO2 | hsa-miR-425      |
| AGO2 | hsa-miR-3942-3p  |
| AGO2 | hsa-miR-4509     |
| AGO2 | hsa-miR-4670-3p  |
| AGO2 | hsa-miR-669h-5p  |
| AGO2 | hsa-miR-660-3p   |
| AGO2 | hsa-miR-302bd    |



|      |                  |
|------|------------------|
| AGO2 | hsa-miR-651      |
| AGO2 | hsa-miR-5627-5p  |
| AGO2 | hsa-miR-7392-3p  |
| AGO2 | hsa-miR-147-5p   |
| AGO2 | hsa-miR-4667-3p  |
| AGO2 | hsa-miR-4731-3p  |
| AGO2 | hsa-miR-6615-3p  |
| AGO2 | hsa-miR-1956     |
| AGO2 | hsa-miR-7399-5p  |
| AGO2 | hsa-miR-4682     |
| AGO2 | hsa-miR-5128     |
| AGO2 | hsa-miR-2900     |
| AGO2 | hsa-miR-2298     |
| AGO2 | hsa-miR-1574-3p  |
| AGO2 | hsa-miR-7176-3p  |
| AGO2 | hsa-miR-6715-3p  |
| AGO2 | hsa-miR-92b-3p   |
| AGO2 | hsa-miR-6416-3p  |
| AGO2 | hsa-miR-5583-5p  |
| AGO2 | hsa-miR-8840     |
| AGO2 | hsa-miR-499      |
| AGO2 | hsa-miR-2284z    |
| AGO2 | hsa-miR-669      |
| AGO2 | hsa-miR-181      |
| AGO2 | hsa-miR-425-3p   |
| AGO2 | hsa-miR-548bb-3p |
| AGO2 | hsa-miR-6969-5p  |
| AGO2 | hsa-miR-6894-3p  |
| AGO2 | hsa-miR-7215-3p  |
| AGO2 | hsa-miR-4647     |
| AGO2 | hsa-miR-548c-3p  |
| AGO2 | hsa-miR-383      |
| AGO2 | hsa-miR-679-5p   |
| AGO2 | hsa-miR-693-5p   |
| AGO2 | hsa-miR-7679-5p  |
| AGO2 | hsa-miR-1227-3p  |
| AGO2 | hsa-miR-1843b-5p |
| AGO2 | hsa-miR-5588-3p  |
| AGO2 | hsa-miR-6805-5p  |
| AGO2 | hsa-miR-8073     |
| AGO2 | hsa-miR-503-5p   |
| AGO2 | hsa-miR-7843-3p  |
| AGO2 | hsa-miR-6508-5p  |
| AGO2 | hsa-miR-5106     |
| AGO2 | hsa-miR-4642     |
| AGO2 | hsa-miR-29b-2-5p |

|      |                  |
|------|------------------|
| AGO2 | hsa-miR-196-1-3p |
| AGO2 | hsa-miR-203b-5p  |
| AGO2 | hsa-miR-9-3-3p   |
| AGO2 | hsa-miR-6752-3p  |
| AGO2 | hsa-miR-1983     |
| AGO2 | hsa-miR-139-5p   |
| AGO2 | hsa-miR-1811     |
| AGO2 | hsa-miR-2284     |
| AGO2 | hsa-miR-190a-5p  |
| AGO2 | hsa-miR-7850-5p  |
| AGO2 | hsa-miR-2285b    |
| AGO2 | hsa-miR-6920-5p  |
| AGO2 | hsa-miR-7681-5p  |
| AGO2 | hsa-miR-1794     |
| AGO2 | hsa-miR-548at-5p |
| AGO2 | hsa-miR-3102-3p  |
| AGO2 | hsa-miR-3075-3p  |
| AGO2 | hsa-miR-8876     |
| AGO2 | hsa-miR-744-5p   |
| AGO2 | hsa-miR-3587     |
| AGO2 | hsa-miR-6835-5p  |
| AGO2 | hsa-miR-1247-5p  |
| AGO2 | hsa-miR-1283     |
| AGO2 | hsa-miR-4795-3p  |
| AGO2 | hsa-miR-200a-5p  |
| AGO2 | hsa-miR-3110-3p  |
| AGO2 | hsa-miR-4663     |
| AGO2 | hsa-miR-466l-5p  |
| AGO2 | hsa-miR-671-5p   |
| AGO2 | hsa-miR-6572-5p  |
| AGO2 | hsa-miR-3585-5p  |
| AGO2 | hsa-miR-638      |
| AGO2 | hsa-miR-8076     |
| AGO2 | hsa-miR-7064-3p  |
| AGO2 | hsa-miR-3558-5p  |
| AGO2 | hsa-miR-185-3p   |
| AGO2 | hsa-miR-361-3p   |
| AGO2 | hsa-miR-6782-3p  |
| AGO2 | hsa-miR-1287     |
| AGO2 | hsa-miR-6371     |
| AGO2 | hsa-miR-653-5p   |
| AGO2 | hsa-miR-7200-3p  |
| AGO2 | hsa-miR-3187-5p  |
| AGO2 | hsa-miR-4662b    |
| AGO2 | hsa-miR-1271-5p  |
| AGO2 | hsa-miR-1540-5p  |

|      |                  |
|------|------------------|
| AGO2 | hsa-miR-4510     |
| AGO2 | hsa-miR-1941-5p  |
| AGO2 | hsa-miR-6841-3p  |
| AGO2 | hsa-miR-6365     |
| AGO2 | hsa-miR-3138     |
| AGO2 | hsa-miR-743b-3p  |
| AGO2 | hsa-miR-6773-5p  |
| AGO2 | hsa-miR-6957-5p  |
| AGO2 | hsa-miR-101-5p   |
| AGO2 | hsa-miR-1226-3p  |
| AGO2 | hsa-miR-8118     |
| AGO2 | hsa-miR-1757     |
| AGO2 | hsa-miR-7076-3p  |
| AGO2 | hsa-miR-597-5p   |
| AGO2 | hsa-miR-326      |
| AGO2 | hsa-miR-1541     |
| AGO2 | hsa-miR-6943-5p  |
| AGO2 | hsa-miR-7362-3p  |
| AGO2 | hsa-miR-7262b-5p |
| AGO2 | hsa-miR-502-5p   |
| AGO2 | hsa-miR-6938-5p  |
| AGO2 | hsa-miR-7028-5p  |
| AGO2 | hsa-miR-8052     |
| AGO2 | hsa-miR-6911-5p  |
| AGO2 | hsa-miR-31-5p    |
| AGO2 | hsa-miR-7386d-3p |
| AGO2 | hsa-miR-4471     |
| AGO2 | hsa-miR-6752-5p  |
| AGO2 | hsa-miR-4790-3p  |
| AGO2 | hsa-miR-7341-5p  |
| AGO2 | hsa-miR-759      |
| AGO2 | hsa-miR-3191-5p  |
| AGO2 | hsa-miR-7668-5p  |
| AGO2 | hsa-miR-485-3p   |
| AGO2 | hsa-miR-548bb-5p |
| AGO2 | hsa-miR-7298-5p  |
| AGO2 | hsa-miR-889-5p   |
| AGO2 | hsa-miR-6791-5p  |
| AGO2 | hsa-miR-7313-5p  |
| AGO2 | hsa-miR-6989-5p  |
| AGO2 | hsa-miR-3559-5p  |
| AGO2 | hsa-miR-4751     |
| AGO2 | hsa-miR-432-5p   |
| AGO2 | hsa-miR-8116     |
| AGO2 | hsa-miR-2328-5p  |
| AGO2 | hsa-miR-3082-5p  |

|      |                   |
|------|-------------------|
| AGO2 | hsa-miR-7235-5p   |
| AGO2 | hsa-miR-328       |
| AGO2 | hsa-miR-4778-5p   |
| AGO2 | hsa-miR-6322      |
| AGO2 | hsa-miR-4307      |
| AGO2 | hsa-miR-8080      |
| AGO2 | hsa-miR-6923-5p   |
| AGO2 | hsa-miR-492       |
| AGO2 | hsa-miR-512-5p    |
| AGO2 | hsa-miR-6561-5p   |
| AGO2 | hsa-miR-664       |
| AGO2 | hsa-miR-214-3p    |
| AGO2 | hsa-miR-6704-5p   |
| AGO2 | hsa-miR-5121      |
| AGO2 | hsa-miR-539-3p    |
| AGO2 | hsa-miR-7025-5p   |
| AGO2 | hsa-miR-2313-3p   |
| AGO2 | hsa-miR-3557-5p   |
| AGO2 | hsa-miR-126a-5p   |
| AGO2 | hsa-miR-3057-5p   |
| AGO2 | hsa-miR-8903      |
| AGO2 | hsa-miR-7371-5p   |
| AGO2 | hsa-miR-7308-3p   |
| AGO2 | hsa-miR-95-3p     |
| AGO2 | hsa-miR-4740-5p   |
| AGO2 | hsa-miR-6130      |
| AGO2 | hsa-miR-4742      |
| AGO2 | hsa-miR-873a-5p.2 |
| AGO2 | hsa-miR-3159      |
| AGO2 | hsa-miR-517       |
| AGO2 | hsa-miR-7212-3p   |
| AGO2 | hsa-miR-4683      |
| AGO2 | hsa-miR-741-5p    |
| AGO2 | hsa-miR-7077-3p   |
| AGO2 | hsa-miR-6731-5p   |
| AGO2 | hsa-miR-548i      |
| AGO2 | hsa-miR-7314-5p   |
| AGO2 | hsa-miR-147a      |
| AGO2 | hsa-miR-629-3p    |
| AGO2 | hsa-miR-215       |
| AGO2 | hsa-miR-758-3p    |
| AGO2 | hsa-miR-7290-5p   |
| AGO2 | hsa-miR-503-3p    |
| AGO2 | hsa-miR-6742-5p   |
| AGO2 | hsa-miR-4515      |
| AGO2 | hsa-miR-1797      |

|      |                   |
|------|-------------------|
| AGO2 | hsa-miR-376a-1-5p |
| AGO2 | hsa-miR-7306-5p   |
| AGO2 | hsa-miR-377-5p    |
| AGO2 | hsa-miR-669g      |
| AGO2 | hsa-miR-4699-3p   |
| AGO2 | hsa-miR-7648-3p   |
| AGO2 | hsa-miR-5703      |
| AGO2 | hsa-miR-7047-3p   |
| AGO2 | hsa-miR-684       |
| AGO2 | hsa-miR-1199-3p   |
| AGO2 | hsa-miR-1786      |
| AGO2 | hsa-miR-7352-5p   |
| AGO2 | hsa-miR-548av-3p  |
| AGO2 | hsa-miR-3924      |
| AGO2 | hsa-miR-766-3p    |
| AGO2 | hsa-miR-548f-5p   |
| AGO2 | hsa-miR-676-3p    |
| AGO2 | hsa-let-7c-5p     |
| AGO2 | hsa-miR-3123      |
| AGO2 | hsa-miR-99a-5p    |
| AGO2 | hsa-miR-293-5p    |
| AGO2 | hsa-miR-7278-3p   |
| AGO2 | hsa-miR-3622b-3p  |
| AGO2 | hsa-miR-2277-3p   |
| AGO2 | hsa-miR-1262-3p   |
| AGO2 | hsa-miR-3104-5p   |
| AGO2 | hsa-miR-4782-5p   |
| AGO2 | hsa-miR-383-5p.1  |
| AGO2 | hsa-miR-1936      |
| AGO2 | hsa-miR-429-5p    |
| AGO2 | hsa-miR-15a-5p    |
| AGO2 | hsa-miR-3074-3p   |
| AGO2 | hsa-miR-1973      |
| AGO2 | hsa-miR-6769b-5p  |
| AGO2 | hsa-miR-6521      |
| AGO2 | hsa-miR-516b      |
| AGO2 | hsa-miR-27a-5p    |
| AGO2 | hsa-miR-1643a-5p  |
| AGO2 | hsa-miR-668       |
| AGO2 | hsa-miR-3093-3p   |
| AGO2 | hsa-miR-133b      |
| AGO2 | hsa-miR-3144-5p   |
| AGO2 | hsa-miR-7349-3p   |
| AGO2 | hsa-miR-1915-3p   |
| AGO2 | hsa-miR-6331      |
| AGO2 | hsa-miR-28-3p     |

|      |                  |
|------|------------------|
| AGO2 | hsa-miR-2333     |
| AGO2 | hsa-miR-709      |
| AGO2 | hsa-miR-6961-5p  |
| AGO2 | hsa-miR-548a-3p  |
| AGO2 | hsa-miR-520e     |
| AGO2 | hsa-miR-3925-3p  |
| AGO2 | hsa-miR-548ah-5p |
| AGO2 | hsa-miR-6125     |
| AGO2 | hsa-miR-875-5p   |
| AGO2 | hsa-miR-155-5p   |
| AGO2 | hsa-miR-7024-5p  |
| AGO2 | hsa-miR-6325     |
| AGO2 | hsa-miR-6971-3p  |
| AGO2 | hsa-miR-548h-5p  |
| AGO2 | hsa-miR-1292-5p  |
| AGO2 | hsa-miR-7358-3p  |
| AGO2 | hsa-miR-7063-5p  |
| AGO2 | hsa-miR-98-5p    |
| AGO2 | hsa-miR-6730-5p  |
| AGO2 | hsa-miR-20a-3p   |
| AGO2 | hsa-miR-6760-3p  |
| AGO2 | hsa-miR-23b-5p   |
| AGO2 | hsa-miR-669hk-3p |
| AGO2 | hsa-miR-4773     |
| AGO2 | hsa-miR-491-5p   |
| AGO2 | hsa-miR-587      |
| AGO2 | hsa-miR-3145-3p  |
| AGO2 | hsa-miR-6876-3p  |
| AGO2 | hsa-miR-764-5p   |
| AGO2 | hsa-miR-2449     |
| AGO2 | hsa-miR-7454-3p  |
| AGO2 | hsa-miR-6075     |
| AGO2 | hsa-miR-26-5p    |
| AGO2 | hsa-miR-6504-3p  |
| AGO2 | hsa-let-7-3p     |
| AGO2 | hsa-miR-890      |
| AGO2 | hsa-miR-4503     |
| AGO2 | hsa-miR-1307-3p  |
| AGO2 | hsa-miR-2892     |
| AGO2 | hsa-miR-6780b-5p |
| AGO2 | hsa-miR-7236-5p  |
| AGO2 | hsa-miR-1205     |
| AGO2 | hsa-miR-2128     |
| AGO2 | hsa-miR-2382-5p  |
| AGO2 | hsa-miR-674-3p   |
| AGO2 | hsa-miR-344-5p   |

|      |                  |
|------|------------------|
| AGO2 | hsa-miR-7268-3p  |
| AGO2 | hsa-miR-132-3p   |
| AGO2 | hsa-miR-1958     |
| AGO2 | hsa-miR-7007-5p  |
| AGO2 | hsa-miR-3614-3p  |
| AGO2 | hsa-miR-378j     |
| AGO2 | hsa-miR-3084-5p  |
| AGO2 | hsa-miR-7054-3p  |
| AGO2 | hsa-miR-4433a-5p |
| AGO2 | hsa-miR-1-1-5p   |
| AGO2 | hsa-miR-6857-3p  |
| AGO2 | hsa-miR-4312     |
| AGO2 | hsa-miR-4729     |
| AGO2 | hsa-miR-6574-5p  |
| AGO2 | hsa-miR-6820-5p  |
| AGO2 | hsa-miR-373-5p   |
| AGO2 | hsa-miR-7192-3p  |
| AGO2 | hsa-miR-7394a-5p |
| AGO2 | hsa-miR-542-3p   |
| AGO2 | hsa-miR-219b-3p  |
| AGO2 | hsa-miR-7379-3p  |
| AGO2 | hsa-miR-186-5p   |
| AGO2 | hsa-miR-185-5p   |
| AGO2 | hsa-miR-7165-3p  |
| AGO2 | hsa-miR-296-3p   |
| AGO2 | hsa-miR-2285q    |
| AGO2 | hsa-miR-890-3p   |
| AGO2 | hsa-miR-7154-3p  |
| AGO2 | hsa-miR-6411     |
| AGO2 | hsa-miR-1654     |
| AGO2 | hsa-miR-2443     |
| AGO2 | hsa-miR-23c      |
| AGO2 | hsa-miR-7438-3p  |
| AGO2 | hsa-miR-2354     |
| AGO2 | hsa-miR-302a-5p  |
| AGO2 | hsa-miR-7083-3p  |
| AGO2 | hsa-miR-1592     |
| AGO2 | hsa-miR-8084     |
| AGO2 | hsa-miR-4640-5p  |
| AGO2 | hsa-miR-4802-3p  |
| AGO2 | hsa-miR-7088-5p  |
| AGO2 | hsa-miR-6673-3p  |
| AGO2 | hsa-miR-1547-5p  |
| AGO2 | hsa-miR-7478-3p  |
| AGO2 | hsa-miR-7851-3p  |
| AGO2 | hsa-miR-452-5p   |

|      |                  |
|------|------------------|
| AGO2 | hsa-miR-2349     |
| AGO2 | hsa-miR-302b-5p  |
| AGO2 | hsa-miR-5194     |
| AGO2 | hsa-miR-1249-5p  |
| AGO2 | hsa-miR-6792-5p  |
| AGO2 | hsa-miR-6761-3p  |
| AGO2 | hsa-miR-8087     |
| AGO2 | hsa-miR-496.2    |
| AGO2 | hsa-miR-455-5p   |
| AGO2 | hsa-miR-889      |
| AGO2 | hsa-miR-513c-3p  |
| AGO2 | hsa-miR-7155-5p  |
| AGO2 | hsa-miR-1647     |
| AGO2 | hsa-miR-3646     |
| AGO2 | hsa-miR-376bc-5p |
| AGO2 | hsa-miR-6388     |
| AGO2 | hsa-miR-6771-5p  |
| AGO2 | hsa-miR-4437     |
| AGO2 | hsa-miR-6770-3p  |
| AGO2 | hsa-miR-6970-3p  |
| AGO2 | hsa-miR-3080-3p  |
| AGO2 | hsa-miR-5000-5p  |
| AGO2 | hsa-miR-520c-3p  |
| AGO2 | hsa-miR-486-5p   |
| AGO2 | hsa-miR-517a-3p  |
| AGO2 | hsa-miR-3060-5p  |
| AGO2 | hsa-miR-6719-3p  |
| AGO2 | hsa-miR-6693-3p  |
| AGO2 | hsa-miR-4449     |
| AGO2 | hsa-miR-6887-3p  |
| AGO2 | hsa-miR-6855-5p  |
| AGO2 | hsa-miR-450b-3p  |
| AGO2 | hsa-miR-1814a    |
| AGO2 | hsa-miR-577-5p   |
| AGO2 | hsa-miR-6984-3p  |
| AGO2 | hsa-miR-7688-5p  |
| AGO2 | hsa-miR-4292     |
| AGO2 | hsa-miR-5007-3p  |
| AGO2 | hsa-miR-6955-5p  |
| AGO2 | hsa-miR-344a-3p  |
| AGO2 | hsa-miR-4251     |
| AGO2 | hsa-miR-5697-3p  |
| AGO2 | hsa-miR-181b-3p  |
| AGO2 | hsa-miR-496a-5p  |
| AGO2 | hsa-miR-330-3p   |
| AGO2 | hsa-miR-4274     |



|      |                  |
|------|------------------|
| AGO2 | hsa-miR-2427     |
| AGO2 | hsa-miR-1643-3p  |
| AGO2 | hsa-miR-7181-5p  |
| AGO2 | hsa-miR-527      |
| AGO2 | hsa-miR-320c     |
| AGO2 | hsa-miR-7265-5p  |
| AGO2 | hsa-miR-1243-5p  |
| AGO2 | hsa-miR-496      |
| AGO2 | hsa-miR-615-3p   |
| AGO2 | hsa-miR-7017-3p  |
| AGO2 | hsa-miR-384      |
| AGO2 | hsa-miR-1468-5p  |
| AGO2 | hsa-miR-4696     |
| AGO2 | hsa-miR-6946-5p  |
| AGO2 | hsa-miR-22-3p    |
| AGO2 | hsa-miR-1955-5p  |
| AGO2 | hsa-miR-125b-5p  |
| AGO2 | hsa-miR-7243-3p  |
| AGO2 | hsa-miR-3920     |
| AGO2 | hsa-miR-7398t-3p |
| AGO2 | hsa-miR-939-3p   |
| AGO2 | hsa-miR-4280     |
| AGO2 | hsa-miR-548x-3p  |
| AGO2 | hsa-miR-99       |
| AGO2 | hsa-miR-10b-5p   |
| AGO2 | hsa-miR-466b-5p  |
| AGO2 | hsa-miR-7398p-5p |
| AGO2 | hsa-miR-6529a    |
| AGO2 | hsa-miR-758-5p   |
| AGO2 | hsa-miR-7219-5p  |
| AGO2 | hsa-miR-3574     |
| AGO2 | hsa-miR-7034-3p  |
| AGO2 | hsa-miR-4687-3p  |
| AGO2 | hsa-miR-644a     |
| AGO2 | hsa-miR-2399-3p  |
| AGO2 | hsa-miR-6948-3p  |
| AGO2 | hsa-miR-6387     |
| AGO2 | hsa-miR-6824-5p  |
| AGO2 | hsa-miR-6404     |
| AGO2 | hsa-miR-7208-5p  |
| AGO2 | hsa-miR-4750-3p  |
| AGO2 | hsa-miR-421      |
| AGO2 | hsa-miR-8900     |
| AGO2 | hsa-miR-6165     |
| AGO2 | hsa-miR-206      |
| AGO2 | hsa-miR-3127-3p  |

|      |                   |
|------|-------------------|
| AGO2 | hsa-miR-4650-3p   |
| AGO2 | hsa-miR-4761-5p   |
| AGO2 | hsa-miR-647       |
| AGO2 | hsa-miR-7671-5p   |
| AGO2 | hsa-miR-1a-5p     |
| AGO2 | hsa-miR-6709-5p   |
| AGO2 | hsa-miR-1329-5p   |
| AGO2 | hsa-miR-350-3p    |
| AGO2 | hsa-miR-7259-5p   |
| AGO2 | hsa-miR-6929-5p   |
| AGO2 | hsa-miR-8854      |
| AGO2 | hsa-miR-1266-5p   |
| AGO2 | hsa-miR-7008-5p   |
| AGO2 | hsa-miR-1260a     |
| AGO2 | hsa-miR-7438-5p   |
| AGO2 | hsa-miR-8100      |
| AGO2 | hsa-miR-7381-5p   |
| AGO2 | hsa-miR-19-5p     |
| AGO2 | hsa-miR-3921      |
| AGO2 | hsa-miR-5195-5p   |
| AGO2 | hsa-miR-4491      |
| AGO2 | hsa-miR-34b-3p    |
| AGO2 | hsa-miR-3914      |
| AGO2 | hsa-miR-3917      |
| AGO2 | hsa-miR-4539      |
| AGO2 | hsa-miR-6374      |
| AGO2 | hsa-miR-511-5p    |
| AGO2 | hsa-miR-371b-5p   |
| AGO2 | hsa-miR-5095      |
| AGO2 | hsa-miR-7091-5p   |
| AGO2 | hsa-miR-1288-3p   |
| AGO2 | hsa-miR-208-3p    |
| AGO2 | hsa-miR-3535      |
| AGO2 | hsa-miR-8805      |
| AGO2 | hsa-miR-6747-3p   |
| AGO2 | hsa-miR-183-5p.1  |
| AGO2 | hsa-miR-876-5p    |
| AGO2 | hsa-miR-3622b-5p  |
| AGO2 | hsa-miR-149-5p    |
| AGO2 | hsa-miR-4486      |
| AGO2 | hsa-miR-26-3-3p   |
| AGO2 | hsa-miR-8848      |
| AGO2 | hsa-miR-103a-2-5p |
| AGO2 | hsa-miR-717       |
| AGO2 | hsa-miR-2441      |
| AGO2 | hsa-miR-6975-3p   |

|      |                  |
|------|------------------|
| AGO2 | hsa-miR-625-5p   |
| AGO2 | hsa-miR-7973     |
| AGO2 | hsa-miR-7242-3p  |
| AGO2 | hsa-miR-3099     |
| AGO2 | hsa-miR-1306-3p  |
| AGO2 | hsa-miR-6644-3p  |
| AGO2 | hsa-miR-150-5p   |
| AGO2 | hsa-miR-302a-3p  |
| AGO2 | hsa-miR-6954-5p  |
| AGO2 | hsa-miR-3558-3p  |
| AGO2 | hsa-miR-216      |
| AGO2 | hsa-miR-1282     |
| AGO2 | hsa-miR-6874-3p  |
| AGO2 | hsa-miR-6514-3p  |
| AGO2 | hsa-miR-424-3p   |
| AGO2 | hsa-miR-6736-3p  |
| AGO2 | hsa-miR-192-5p   |
| AGO2 | hsa-miR-3607-3p  |
| AGO2 | hsa-miR-3075-5p  |
| AGO2 | hsa-miR-616-3p   |
| AGO2 | hsa-miR-712-5p   |
| AGO2 | hsa-miR-4755-5p  |
| AGO2 | hsa-miR-6995-3p  |
| AGO2 | hsa-miR-222-3p   |
| AGO2 | hsa-miR-6956-5p  |
| AGO2 | hsa-miR-592-3p   |
| AGO2 | hsa-miR-4477a    |
| AGO2 | hsa-miR-6334     |
| AGO2 | hsa-miR-7845-5p  |
| AGO2 | hsa-miR-6776-5p  |
| AGO2 | hsa-miR-409      |
| AGO2 | hsa-miR-34bc-3p  |
| AGO2 | hsa-miR-876-3p   |
| AGO2 | hsa-miR-6590-5p  |
| AGO2 | hsa-miR-3154     |
| AGO2 | hsa-miR-1273g-3p |
| AGO2 | hsa-miR-651-5p   |
| AGO2 | hsa-miR-7252-5p  |
| AGO2 | hsa-miR-338-3p   |
| AGO2 | hsa-miR-1273f    |
| AGO2 | hsa-miR-1749-5p  |
| AGO2 | hsa-miR-330-5p   |
| AGO2 | hsa-miR-6991-3p  |
| AGO2 | hsa-miR-4652-3p  |
| AGO2 | hsa-miR-6967-3p  |
| AGO2 | hsa-miR-532-3p   |

|      |                  |
|------|------------------|
| AGO2 | hsa-miR-4775     |
| AGO2 | hsa-miR-6819-5p  |
| AGO2 | hsa-miR-2426     |
| AGO2 | hsa-miR-328-5p   |
| AGO2 | hsa-miR-519-5p   |
| AGO2 | hsa-miR-27a-3p   |
| AGO2 | hsa-miR-1802     |
| AGO2 | hsa-miR-520gh    |
| AGO2 | hsa-miR-7977     |
| AGO2 | hsa-miR-8816     |
| AGO2 | hsa-miR-7311-5p  |
| AGO2 | hsa-miR-6778-5p  |
| AGO2 | hsa-miR-1912-5p  |
| AGO2 | hsa-miR-887-5p   |
| AGO2 | hsa-miR-1-3p     |
| AGO2 | hsa-miR-299b-5p  |
| AGO2 | hsa-miR-7859     |
| AGO2 | hsa-miR-6794-3p  |
| AGO2 | hsa-miR-3663-5p  |
| AGO2 | hsa-miR-2411-5p  |
| AGO2 | hsa-miR-5133     |
| AGO2 | hsa-miR-6501-3p  |
| AGO2 | hsa-miR-1190     |
| AGO2 | hsa-miR-1960     |
| AGO2 | hsa-miR-19       |
| AGO2 | hsa-miR-211-5p   |
| AGO2 | hsa-miR-1812-3p  |
| AGO2 | hsa-miR-2330-5p  |
| AGO2 | hsa-miR-1901     |
| AGO2 | hsa-miR-8103     |
| AGO2 | hsa-miR-218-2-3p |
| AGO2 | hsa-miR-6876-5p  |
| AGO2 | hsa-miR-548c-5p  |
| AGO2 | hsa-miR-1264-3p  |
| AGO2 | hsa-miR-429-3p   |
| AGO2 | hsa-miR-149-5p   |
| AGO2 | hsa-miR-4419a    |
| AGO2 | hsa-miR-4328     |
| AGO2 | hsa-miR-7398h-5p |
| AGO2 | hsa-miR-3150b-3p |
| AGO2 | hsa-miR-148-5p   |
| AGO2 | hsa-miR-7856-5p  |
| AGO2 | hsa-miR-4662-5p  |
| AGO2 | hsa-miR-3113-5p  |
| AGO2 | hsa-miR-942      |
| AGO2 | hsa-miR-6570-5p  |

|      |                   |
|------|-------------------|
| AGO2 | hsa-miR-6316      |
| AGO2 | hsa-miR-143-3p    |
| AGO2 | hsa-miR-6859-3p   |
| AGO2 | hsa-miR-101b-3p.2 |
| AGO2 | hsa-miR-1254      |
| AGO2 | hsa-miR-4755-3p   |
| AGO2 | hsa-miR-7325-3p   |
| AGO2 | hsa-miR-2393      |
| AGO2 | hsa-miR-7456-5p   |
| AGO2 | hsa-miR-742-5p    |
| AGO2 | hsa-miR-135b-3p   |
| AGO2 | hsa-miR-6575-5p   |
| AGO2 | hsa-miR-5189-3p   |
| AGO2 | hsa-miR-494-3p    |
| AGO2 | hsa-miR-18-3p     |
| AGO2 | hsa-miR-549a      |
| AGO2 | hsa-miR-2385-5p   |
| AGO2 | hsa-miR-7023-3p   |
| AGO2 | hsa-miR-340-5p    |
| AGO2 | hsa-miR-1545c-3p  |
| AGO2 | hsa-miR-465abc-3p |
| AGO2 | hsa-miR-30d-3p    |
| AGO2 | hsa-miR-23-5p     |
| AGO2 | hsa-miR-1970      |
| AGO2 | hsa-miR-16-5p     |
| AGO2 | hsa-miR-3560      |
| AGO2 | hsa-miR-3085-3p   |
| AGO2 | hsa-miR-7680-3p   |
| AGO2 | hsa-miR-222-3p    |
| AGO2 | hsa-miR-656       |
| AGO2 | hsa-miR-6994-5p   |
| AGO2 | hsa-miR-30b-5p    |
| AGO2 | hsa-miR-7249-5p   |
| AGO2 | hsa-miR-2344      |
| AGO2 | hsa-miR-4433b-3p  |
| AGO2 | hsa-miR-4308      |
| AGO2 | hsa-miR-200b-3p   |
| AGO2 | hsa-miR-4252      |
| AGO2 | hsa-miR-1245a     |
| AGO2 | hsa-miR-6695-5p   |
| AGO2 | hsa-miR-653       |
| AGO2 | hsa-miR-1839      |
| AGO2 | hsa-miR-2188-3p   |
| AGO2 | hsa-miR-3544-3p   |
| AGO2 | hsa-miR-4713-3p   |
| AGO2 | hsa-miR-7462-3p   |

|      |                   |
|------|-------------------|
| AGO2 | hsa-miR-7460-3p   |
| AGO2 | hsa-miR-6960-3p   |
| AGO2 | hsa-miR-1620      |
| AGO2 | hsa-miR-596       |
| AGO2 | hsa-miR-5010-5p   |
| AGO2 | hsa-miR-142-3p    |
| AGO2 | hsa-miR-632       |
| AGO2 | hsa-miR-2306      |
| AGO2 | hsa-miR-298-5p    |
| AGO2 | hsa-miR-8841      |
| AGO2 | hsa-miR-2894      |
| AGO2 | hsa-miR-26        |
| AGO2 | hsa-miR-7171-3p   |
| AGO2 | hsa-miR-506-3p    |
| AGO2 | hsa-miR-2340      |
| AGO2 | hsa-miR-9-3p      |
| AGO2 | hsa-miR-6867-3p   |
| AGO2 | hsa-miR-669m-5p   |
| AGO2 | hsa-miR-8081      |
| AGO2 | hsa-miR-7481-3p   |
| AGO2 | hsa-miR-1738      |
| AGO2 | hsa-miR-5698      |
| AGO2 | hsa-miR-3095-5p   |
| AGO2 | hsa-miR-6882-3p   |
| AGO2 | hsa-miR-2475      |
| AGO2 | hsa-miR-6750-5p   |
| AGO2 | hsa-miR-2442      |
| AGO2 | hsa-miR-4461      |
| AGO2 | hsa-miR-6937-3p   |
| AGO2 | hsa-miR-7045-5p   |
| AGO2 | hsa-miR-337-3p    |
| AGO2 | hsa-miR-7213-5p   |
| AGO2 | hsa-miR-381-3p    |
| AGO2 | hsa-miR-1950      |
| AGO2 | hsa-miR-467g      |
| AGO2 | hsa-miR-143-5p    |
| AGO2 | hsa-miR-6355      |
| AGO2 | hsa-miR-203a-3p.1 |
| AGO2 | hsa-miR-669ao-3p  |
| AGO2 | hsa-miR-3150a-5p  |
| AGO2 | hsa-miR-4698      |
| AGO2 | hsa-miR-32-5p     |
| AGO2 | hsa-miR-3576      |
| AGO2 | hsa-miR-7847-3p   |
| AGO2 | hsa-miR-505-3p    |
| AGO2 | hsa-miR-4709-5p   |

|      |                  |
|------|------------------|
| AGO2 | hsa-miR-624-5p   |
| AGO2 | hsa-miR-122-3p   |
| AGO2 | hsa-miR-6707-5p  |
| AGO2 | hsa-miR-1672     |
| AGO2 | hsa-miR-7313-3p  |
| AGO2 | hsa-miR-1179     |
| AGO2 | hsa-miR-5011-5p  |
| AGO2 | hsa-miR-10b-5p   |
| AGO2 | hsa-miR-881-3p   |
| AGO2 | hsa-miR-6829-5p  |
| AGO2 | hsa-miR-6751-5p  |
| AGO2 | hsa-miR-6574-3p  |
| AGO2 | hsa-miR-500b-5p  |
| AGO2 | hsa-miR-4483     |
| AGO2 | hsa-miR-513a-5p  |
| AGO2 | hsa-miR-7119-5p  |
| AGO2 | hsa-miR-502-3p   |
| AGO2 | hsa-miR-1540     |
| AGO2 | hsa-miR-3682-3p  |
| AGO2 | hsa-miR-8083     |
| AGO2 | hsa-miR-7382-5p  |
| AGO2 | hsa-miR-18-5p    |
| AGO2 | hsa-miR-516b-3p  |
| AGO2 | hsa-miR-570-5p   |
| AGO2 | hsa-miR-196c-3p  |
| AGO2 | hsa-miR-6503-5p  |
| AGO2 | hsa-miR-7385f-3p |
| AGO2 | hsa-miR-6899-3p  |
| AGO2 | hsa-miR-21-3p    |
| AGO2 | hsa-miR-7371b-3p |
| AGO2 | hsa-miR-381-5p   |
| AGO2 | hsa-miR-1896     |
| AGO2 | hsa-miR-2489     |
| AGO2 | hsa-miR-597      |
| AGO2 | hsa-miR-627-5p   |
| AGO2 | hsa-miR-892-3p   |
| AGO2 | hsa-miR-525-5p   |
| AGO2 | hsa-miR-2477     |
| AGO2 | hsa-miR-6743-3p  |
| AGO2 | hsa-miR-7111-5p  |
| AGO2 | hsa-miR-1894-5p  |
| AGO2 | hsa-miR-6849-3p  |
| AGO2 | hsa-miR-1546-3p  |
| AGO2 | hsa-miR-520d-3p  |
| AGO2 | hsa-miR-7299-5p  |
| AGO2 | hsa-miR-7223-5p  |

|      |                  |
|------|------------------|
| AGO2 | hsa-miR-6892-3p  |
| AGO2 | hsa-miR-6740-5p  |
| AGO2 | hsa-miR-7356-3p  |
| AGO2 | hsa-miR-323a-3p  |
| AGO2 | hsa-miR-6588-3p  |
| AGO2 | hsa-miR-3076-3p  |
| AGO2 | hsa-miR-10b-3p   |
| AGO2 | hsa-miR-519-3p   |
| AGO2 | hsa-miR-2406     |
| AGO2 | hsa-miR-6824-3p  |
| AGO2 | hsa-miR-2358     |
| AGO2 | hsa-miR-7057-5p  |
| AGO2 | hsa-miR-3934-5p  |
| AGO2 | hsa-miR-4254     |
| AGO2 | hsa-miR-636      |
| AGO2 | hsa-miR-331-3p   |
| AGO2 | hsa-miR-6589-5p  |
| AGO2 | hsa-miR-1468     |
| AGO2 | hsa-miR-7066-5p  |
| AGO2 | hsa-miR-541-3p   |
| AGO2 | hsa-miR-1719     |
| AGO2 | hsa-miR-6705-5p  |
| AGO2 | hsa-miR-8075     |
| AGO2 | hsa-miR-7106-5p  |
| AGO2 | hsa-miR-7682-5p  |
| AGO2 | hsa-miR-3057-3p  |
| AGO2 | hsa-miR-1639     |
| AGO2 | hsa-miR-7196-5p  |
| AGO2 | hsa-miR-7386g-3p |
| AGO2 | hsa-miR-4481     |
| AGO2 | hsa-miR-4798-3p  |
| AGO2 | hsa-miR-3100-3p  |
| AGO2 | hsa-miR-7-3p     |
| AGO2 | hsa-miR-7380-3p  |
| AGO2 | hsa-miR-7041-5p  |
| AGO2 | hsa-miR-4526     |
| AGO2 | hsa-miR-224-3p   |
| AGO2 | hsa-miR-30c-5p   |
| AGO2 | hsa-miR-182-5p   |
| AGO2 | hsa-miR-3085     |
| AGO2 | hsa-miR-7238-3p  |
| AGO2 | hsa-let-7e-5p    |
| AGO2 | hsa-miR-6403     |
| AGO2 | hsa-miR-428      |
| AGO2 | hsa-miR-6772-5p  |
| AGO2 | hsa-miR-7117-5p  |



|      |                   |
|------|-------------------|
| AGO2 | hsa-miR-92-5p     |
| AGO2 | hsa-miR-6861-3p   |
| AGO2 | hsa-miR-3129-3p   |
| AGO2 | hsa-miR-28-5p     |
| AGO2 | hsa-miR-200c-3p   |
| AGO2 | hsa-miR-7010-5p   |
| AGO2 | hsa-miR-372-3p    |
| AGO2 | hsa-miR-7116-3p   |
| AGO2 | hsa-miR-218-5p    |
| AGO2 | hsa-miR-7262a-5p  |
| AGO2 | hsa-miR-6515-5p   |
| AGO2 | hsa-miR-7094-1-5p |
| AGO2 | hsa-miR-6087      |
| AGO2 | hsa-miR-7386k-5p  |
| AGO2 | hsa-miR-2330-3p   |
| AGO2 | hsa-miR-7326-5p   |
| AGO2 | hsa-miR-382-3p    |
| AGO2 | hsa-miR-96-3p     |
| AGO2 | hsa-miR-1773-5p   |
| AGO2 | hsa-miR-343       |
| AGO2 | hsa-miR-7398r-5p  |
| AGO2 | hsa-miR-2316      |
| AGO2 | hsa-miR-3098-5p   |
| AGO2 | hsa-miR-7355-5p   |
| AGO2 | hsa-miR-197-3p    |
| AGO2 | hsa-miR-7033-3p   |
| AGO2 | hsa-miR-7672-5p   |
| AGO2 | hsa-miR-2300-3p   |
| AGO2 | hsa-miR-7675-3p   |
| AGO2 | hsa-miR-7297-3p   |
| AGO2 | hsa-miR-6742-3p   |
| AGO2 | hsa-miR-3678-3p   |
| AGO2 | hsa-miR-5706      |
| AGO2 | hsa-miR-2054      |
| AGO2 | hsa-miR-2366      |
| AGO2 | hsa-let-7a-5p     |
| AGO2 | hsa-miR-5696      |
| AGO2 | hsa-miR-135       |
| AGO2 | hsa-miR-7109-5p   |
| AGO2 | hsa-miR-7857      |
| AGO2 | hsa-miR-6338      |
| AGO2 | hsa-miR-100-5p    |
| AGO2 | hsa-miR-7227-5p   |
| AGO2 | hsa-miR-223-5p    |
| AGO2 | hsa-miR-1943-3p   |
| AGO2 | hsa-miR-8819      |

|      |                   |
|------|-------------------|
| AGO2 | hsa-miR-7439-3p   |
| AGO2 | hsa-miR-7189-3p   |
| AGO2 | hsa-miR-3664-5p   |
| AGO2 | hsa-miR-7976      |
| AGO2 | hsa-miR-218a-2-3p |
| AGO2 | hsa-miR-7173-5p   |
| AGO2 | hsa-miR-103-3p    |
| AGO2 | hsa-miR-4801      |
| AGO2 | hsa-miR-7264-3p   |
| AGO2 | hsa-miR-6871-3p   |
| AGO2 | hsa-miR-1245b-3p  |
| AGO2 | hsa-miR-7338-5p   |
| AGO2 | hsa-miR-10-5p     |
| AGO2 | hsa-miR-4325      |
| AGO2 | hsa-miR-743ab-3p  |
| AGO2 | hsa-miR-17        |
| AGO2 | hsa-miR-4694-3p   |
| AGO2 | hsa-miR-320a      |
| AGO2 | hsa-miR-6931-5p   |
| AGO2 | hsa-miR-3076-5p   |
| AGO2 | hsa-miR-8812      |
| AGO2 | hsa-miR-98-5p     |
| AGO2 | hsa-miR-8090      |
| AGO2 | hsa-miR-2360      |
| AGO2 | hsa-miR-8837      |
| AGO2 | hsa-miR-6852-5p   |
| AGO2 | hsa-miR-339-5p    |
| AGO2 | hsa-miR-4680      |
| AGO2 | hsa-miR-3151      |
| AGO2 | hsa-miR-4514      |
| AGO2 | hsa-miR-7015-5p   |
| AGO2 | hsa-miR-7473-5p   |
| AGO2 | hsa-miR-184-5p    |
| AGO2 | hsa-miR-142-5p    |
| AGO2 | hsa-miR-7085-3p   |
| AGO2 | hsa-miR-6571-5p   |
| AGO2 | hsa-miR-654-3p    |
| AGO2 | hsa-miR-4733-3p   |
| AGO2 | hsa-miR-8806      |
| AGO2 | hsa-miR-601       |
| AGO2 | hsa-miR-548an     |
| AGO2 | hsa-miR-7108-3p   |
| AGO2 | hsa-miR-9769-5p   |
| AGO2 | hsa-miR-5003-5p   |
| AGO2 | hsa-miR-4301      |
| AGO2 | hsa-miR-7170-3p   |

|      |                  |
|------|------------------|
| AGO2 | hsa-miR-7398g-3p |
| AGO2 | hsa-miR-7261-5p  |
| AGO2 | hsa-miR-7260-5p  |
| AGO2 | hsa-miR-5692a    |
| AGO2 | hsa-miR-374-5p   |
| AGO2 | hsa-miR-484      |
| AGO2 | hsa-miR-134      |
| AGO2 | hsa-miR-6858-5p  |
| AGO2 | hsa-miR-106b-3p  |
| AGO2 | hsa-miR-2399-5p  |
| AGO2 | hsa-miR-6119-5p  |
| AGO2 | hsa-miR-7008-3p  |
| AGO2 | hsa-miR-6368     |
| AGO2 | hsa-miR-7328-3p  |
| AGO2 | hsa-miR-130a-3p  |
| AGO2 | hsa-miR-1957a    |
| AGO2 | hsa-miR-4291     |
| AGO2 | hsa-miR-4677-5p  |
| AGO2 | hsa-miR-8062     |
| AGO2 | hsa-miR-2285j    |
| AGO2 | hsa-miR-6543-3p  |
| AGO2 | hsa-miR-151      |
| AGO2 | hsa-miR-598-3p   |
| AGO2 | hsa-miR-7249-3p  |
| AGO2 | hsa-miR-193a-5p  |
| AGO2 | hsa-miR-4768-5p  |
| AGO2 | hsa-miR-7334-5p  |
| AGO2 | hsa-miR-101c     |
| AGO2 | hsa-miR-883-5p   |
| AGO2 | hsa-miR-372-5p   |
| AGO2 | hsa-miR-4757-5p  |
| AGO2 | hsa-miR-200ab-5p |
| AGO2 | hsa-miR-379-3p   |
| AGO2 | hsa-miR-4455     |
| AGO2 | hsa-miR-5619-5p  |
| AGO2 | hsa-miR-455-3p   |
| AGO2 | hsa-miR-8799     |
| AGO2 | hsa-miR-1547-3p  |
| AGO2 | hsa-miR-7g-3p    |
| AGO2 | hsa-miR-323a-5p  |
| AGO2 | hsa-miR-3085-5p  |
| AGO2 | hsa-miR-4699-5p  |
| AGO2 | hsa-miR-3569-5p  |
| AGO2 | hsa-miR-663a     |
| AGO2 | hsa-miR-99b-5p   |
| AGO2 | hsa-miR-7158-3p  |

|      |                  |
|------|------------------|
| AGO2 | hsa-miR-146b-3p  |
| AGO2 | hsa-miR-6856-3p  |
| AGO2 | hsa-miR-1301-3p  |
| AGO2 | hsa-miR-6889-3p  |
| AGO2 | hsa-miR-7018-5p  |
| AGO2 | hsa-miR-6965-3p  |
| AGO2 | hsa-miR-5615-5p  |
| AGO2 | hsa-miR-524-5p   |
| AGO2 | hsa-miR-3158-3p  |
| AGO2 | hsa-miR-6912-5p  |
| AGO2 | hsa-miR-7326-3p  |
| AGO2 | hsa-miR-384-5p   |
| AGO2 | hsa-miR-3180-3p  |
| AGO2 | hsa-miR-6974-5p  |
| AGO2 | hsa-miR-3120-3p  |
| AGO2 | hsa-miR-6917-3p  |
| AGO2 | hsa-miR-2131-5p  |
| AGO2 | hsa-miR-3091-3p  |
| AGO2 | hsa-miR-710      |
| AGO2 | hsa-miR-300      |
| AGO2 | hsa-miR-4430     |
| AGO2 | hsa-miR-891a     |
| AGO2 | hsa-miR-7371b-5p |
| AGO2 | hsa-miR-6516-5p  |
| AGO2 | hsa-miR-6516     |
| AGO2 | hsa-miR-942-5p   |
| AGO2 | hsa-miR-888-5p   |
| AGO2 | hsa-miR-122      |
| AGO2 | hsa-miR-466mo-3p |
| AGO2 | hsa-miR-6781-3p  |
| AGO2 | hsa-miR-1539     |
| AGO2 | hsa-miR-7398u-3p |
| AGO2 | hsa-miR-7218-5p  |
| AGO2 | hsa-miR-126-5p   |
| AGO2 | hsa-miR-6729-3p  |
| AGO2 | hsa-miR-6927-3p  |
| AGO2 | hsa-miR-7205-3p  |
| AGO2 | hsa-miR-6832-3p  |
| AGO2 | hsa-miR-3068-5p  |
| AGO2 | hsa-miR-7359-3p  |
| AGO2 | hsa-miR-8108     |
| AGO2 | hsa-miR-211-3p   |
| AGO2 | hsa-miR-7343-5p  |
| AGO2 | hsa-miR-7-5p     |
| AGO2 | hsa-miR-7673-5p  |
| AGO2 | hsa-miR-4645-5p  |

|      |                  |
|------|------------------|
| AGO2 | hsa-miR-7660-3p  |
| AGO2 | hsa-miR-411-5p.1 |
| AGO2 | hsa-miR-633      |
| AGO2 | hsa-miR-4255     |
| AGO2 | hsa-miR-548v     |
| AGO2 | hsa-miR-5134-3p  |
| AGO2 | hsa-miR-101-3p   |
| AGO2 | hsa-miR-1711     |
| AGO2 | hsa-miR-576-5p   |
| AGO2 | hsa-miR-134-3p   |
| AGO2 | hsa-miR-4746-5p  |
| AGO2 | hsa-miR-2301     |
| AGO2 | hsa-miR-6418-3p  |
| AGO2 | hsa-miR-412      |
| AGO2 | hsa-miR-455-3p.2 |
| AGO2 | hsa-miR-580      |
| AGO2 | hsa-miR-3074-5p  |
| AGO2 | hsa-miR-1599     |
| AGO2 | hsa-miR-4534     |
| AGO2 | hsa-miR-6629-5p  |
| AGO2 | hsa-miR-2114-3p  |
| AGO2 | hsa-miR-2397-5p  |
| AGO2 | hsa-miR-1233-3p  |
| AGO2 | hsa-miR-3562     |
| AGO2 | hsa-miR-4421     |
| AGO2 | hsa-miR-672-3p   |
| AGO2 | hsa-miR-6481     |
| AGO2 | hsa-miR-7339-3p  |
| AGO2 | hsa-miR-765      |
| AGO2 | hsa-miR-6350     |
| AGO2 | hsa-miR-223-3p   |
| AGO2 | hsa-miR-150-5p   |
| AGO2 | hsa-miR-802      |
| AGO2 | hsa-miR-2320-5p  |
| AGO2 | hsa-miR-7383-3p  |
| AGO2 | hsa-miR-1195     |
| AGO2 | hsa-miR-361-5p   |
| AGO2 | hsa-miR-6552-5p  |
| AGO2 | hsa-miR-466dk-5p |
| AGO2 | hsa-miR-4637     |
| AGO2 | hsa-miR-3167-5p  |
| AGO2 | hsa-miR-3163     |
| AGO2 | hsa-miR-541-5p   |
| AGO2 | hsa-miR-1298-3p  |
| AGO2 | hsa-miR-568      |
| AGO2 | hsa-miR-1687-3p  |

|      |                  |
|------|------------------|
| AGO2 | hsa-miR-6321     |
| AGO2 | hsa-miR-3690     |
| AGO2 | hsa-miR-3174     |
| AGO2 | hsa-miR-3137     |
| AGO2 | hsa-miR-324-5p   |
| AGO2 | hsa-miR-7388b-3p |
| AGO2 | hsa-miR-329a     |
| AGO2 | hsa-miR-8907     |
| AGO2 | hsa-miR-658      |
| AGO2 | hsa-miR-323      |
| AGO2 | hsa-miR-6982-5p  |
| AGO2 | hsa-miR-6538     |
| AGO2 | hsa-miR-141-3p   |
| AGO2 | hsa-miR-1343-3p  |
| AGO2 | hsa-miR-5130     |
| AGO2 | hsa-miR-431-5p   |
| AGO2 | hsa-miR-6405     |
| AGO2 | hsa-miR-3688-5p  |
| AGO2 | hsa-miR-1733     |
| AGO2 | hsa-miR-3688-3p  |
| AGO2 | hsa-miR-8117     |
| AGO2 | hsa-miR-6897-3p  |
| AGO2 | hsa-miR-504-3p   |
| AGO2 | hsa-miR-6934-3p  |
| AGO2 | hsa-miR-5687     |
| AGO2 | hsa-miR-7172-3p  |
| AGO2 | hsa-miR-7202-5p  |
| AGO2 | hsa-miR-6346     |
| AGO2 | hsa-miR-7398d-3p |
| AGO2 | hsa-miR-8067     |
| AGO2 | hsa-miR-3096-5p  |
| AGO2 | hsa-miR-7398e-3p |
| AGO2 | hsa-miR-1560-3p  |
| AGO2 | hsa-miR-6407     |
| AGO2 | hsa-miR-7030-5p  |
| AGO2 | hsa-miR-3976     |
| AGO2 | hsa-miR-92a-5p   |
| AGO2 | hsa-miR-26b-3p   |
| AGO2 | hsa-miR-7213-3p  |
| AGO2 | hsa-miR-6747-5p  |
| AGO2 | hsa-miR-378c     |
| AGO2 | hsa-let-7a-3p    |
| AGO2 | hsa-miR-370-5p   |
| AGO2 | hsa-miR-1753     |
| AGO2 | hsa-miR-3197     |
| AGO2 | hsa-miR-5132-3p  |

|      |                   |
|------|-------------------|
| AGO2 | hsa-miR-3580-5p   |
| AGO2 | hsa-miR-3113-3p   |
| AGO2 | hsa-miR-6864-3p   |
| AGO2 | hsa-miR-107-5p    |
| AGO2 | hsa-miR-466aep-5p |
| AGO2 | hsa-miR-6909-5p   |
| AGO2 | hsa-miR-148-3p    |
| AGO2 | hsa-miR-7155-3p   |
| AGO2 | hsa-miR-7090-5p   |
| AGO2 | hsa-miR-1930-5p   |
| AGO2 | hsa-miR-1202      |
| AGO2 | hsa-miR-34        |
| AGO2 | hsa-miR-1193-5p   |
| AGO2 | hsa-miR-7515      |
| AGO2 | hsa-miR-7174-5p   |
| AGO2 | hsa-miR-7678-3p   |
| AGO2 | hsa-miR-548aj-5p  |
| AGO2 | hsa-miR-764-3p    |
| AGO2 | hsa-miR-4524a-3p  |
| AGO2 | hsa-miR-211-5p    |
| AGO2 | hsa-miR-7194-3p   |
| AGO2 | hsa-miR-6664-3p   |
| AGO2 | hsa-miR-6753-3p   |
| AGO2 | hsa-miR-1775-3p   |
| AGO2 | hsa-miR-8808      |
| AGO2 | hsa-miR-2423      |
| AGO2 | hsa-miR-6326      |
| AGO2 | hsa-miR-6796-5p   |
| AGO2 | hsa-miR-4286      |
| AGO2 | hsa-miR-3922-5p   |
| AGO2 | hsa-miR-1283a     |
| AGO2 | hsa-miR-6083      |
| AGO2 | hsa-miR-7342-3p   |
| AGO2 | hsa-miR-548au-5p  |
| AGO2 | hsa-miR-3165      |
| AGO2 | hsa-miR-4796-5p   |
| AGO2 | hsa-miR-1233-5p   |
| AGO2 | hsa-miR-3590-3p   |
| AGO2 | hsa-miR-135a-1-3p |
| AGO2 | hsa-miR-548aq-5p  |
| AGO2 | hsa-miR-674-5p    |
| AGO2 | hsa-miR-191-5p    |
| AGO2 | hsa-miR-1624      |
| AGO2 | hsa-miR-704       |
| AGO2 | hsa-miR-101a-5p   |
| AGO2 | hsa-miR-7215-5p   |

|      |                   |
|------|-------------------|
| AGO2 | hsa-miR-411-3p    |
| AGO2 | hsa-miR-2431-3p   |
| AGO2 | hsa-miR-3191-3p   |
| AGO2 | hsa-miR-96-5p     |
| AGO2 | hsa-miR-582-5p    |
| AGO2 | hsa-miR-8886      |
| AGO2 | hsa-miR-219a-5p   |
| AGO2 | hsa-miR-296-5p    |
| AGO2 | hsa-miR-6793-3p   |
| AGO2 | hsa-miR-1816      |
| AGO2 | hsa-miR-2284v     |
| AGO2 | hsa-miR-548av-5p  |
| AGO2 | hsa-miR-7312-3p   |
| AGO2 | hsa-miR-3908      |
| AGO2 | hsa-miR-3117-3p   |
| AGO2 | hsa-miR-19-3p     |
| AGO2 | hsa-miR-1252-5p   |
| AGO2 | hsa-miR-6911-3p   |
| AGO2 | hsa-miR-2284k     |
| AGO2 | hsa-miR-7352-3p   |
| AGO2 | hsa-miR-448       |
| AGO2 | hsa-miR-2285x     |
| AGO2 | hsa-miR-9406      |
| AGO2 | hsa-miR-523-3p    |
| AGO2 | hsa-miR-6535      |
| AGO2 | hsa-miR-3596      |
| AGO2 | hsa-miR-374b-5p   |
| AGO2 | hsa-miR-891-3p    |
| AGO2 | hsa-miR-130-5p    |
| AGO2 | hsa-miR-3089-5p   |
| AGO2 | hsa-miR-378g      |
| AGO2 | hsa-miR-424-5p    |
| AGO2 | hsa-miR-1199-5p   |
| AGO2 | hsa-miR-7354-3p   |
| AGO2 | hsa-miR-4463      |
| AGO2 | hsa-miR-7266-5p   |
| AGO2 | hsa-miR-6828-3p   |
| AGO2 | hsa-miR-365b-3p   |
| AGO2 | hsa-miR-7057-3p   |
| AGO2 | hsa-miR-219a-1-3p |
| AGO2 | hsa-miR-6754-3p   |
| AGO2 | hsa-miR-7157-3p   |
| AGO2 | hsa-miR-548k      |
| AGO2 | hsa-miR-6508-3p   |
| AGO2 | hsa-miR-6782-5p   |
| AGO2 | hsa-miR-7843-5p   |



|      |                   |
|------|-------------------|
| AGO2 | hsa-miR-1905      |
| AGO2 | hsa-miR-6616-5p   |
| AGO2 | hsa-miR-187-5p    |
| AGO2 | hsa-miR-8814      |
| AGO2 | hsa-miR-2319      |
| AGO2 | hsa-miR-7387-3p   |
| AGO2 | hsa-miR-294       |
| AGO2 | hsa-miR-29-3p     |
| AGO2 | hsa-miR-4269      |
| AGO2 | hsa-miR-7390-5p   |
| AGO2 | hsa-miR-7378-3p   |
| AGO2 | hsa-miR-1656      |
| AGO2 | hsa-miR-4787-5p   |
| AGO2 | hsa-miR-92-3p     |
| AGO2 | hsa-miR-3160-5p   |
| AGO2 | hsa-miR-883-3p    |
| AGO2 | hsa-miR-25-5p     |
| AGO2 | hsa-miR-5702      |
| AGO2 | hsa-miR-3097-5p   |
| AGO2 | hsa-miR-1247-3p   |
| AGO2 | hsa-miR-191-5p    |
| AGO2 | hsa-miR-4776-5p   |
| AGO2 | hsa-miR-7046-3p   |
| AGO2 | hsa-miR-1930-3p   |
| AGO2 | hsa-miR-7327-5p   |
| AGO2 | hsa-miR-683       |
| AGO2 | hsa-miR-6883-5p   |
| AGO2 | hsa-miR-7647-5p   |
| AGO2 | hsa-miR-374b-3p   |
| AGO2 | hsa-miR-4423-5p   |
| AGO2 | hsa-miR-181b-5p   |
| AGO2 | hsa-miR-7032-5p   |
| AGO2 | hsa-miR-7371a-3p  |
| AGO2 | hsa-miR-4658      |
| AGO2 | hsa-miR-133a-3p.2 |
| AGO2 | hsa-miR-6359      |
| AGO2 | hsa-miR-133b-5p   |
| AGO2 | hsa-miR-6827-3p   |
| AGO2 | hsa-miR-320d      |
| AGO2 | hsa-miR-3689-3p   |
| AGO2 | hsa-miR-1655-5p   |
| AGO2 | hsa-miR-2471-3p   |
| AGO2 | hsa-miR-2467-5p   |
| AGO2 | hsa-miR-3548      |
| AGO2 | hsa-miR-470-5p    |
| AGO2 | hsa-miR-7386i-3p  |

|      |                  |
|------|------------------|
| AGO2 | hsa-miR-133a-5p  |
| AGO2 | hsa-miR-5681a    |
| AGO2 | hsa-miR-130      |
| AGO2 | hsa-miR-511      |
| AGO2 | hsa-miR-548e-5p  |
| AGO2 | hsa-miR-1754-3p  |
| AGO2 | hsa-miR-297bc-3p |
| AGO2 | hsa-miR-544a     |
| AGO2 | hsa-miR-7054-5p  |
| AGO2 | hsa-miR-3689e    |
| AGO2 | hsa-miR-1814     |
| AGO2 | hsa-miR-6684-5p  |
| AGO2 | hsa-miR-3713     |
| AGO2 | hsa-miR-6785-5p  |
| AGO2 | hsa-miR-1603     |
| AGO2 | hsa-miR-2970-5p  |
| AGO2 | hsa-miR-7112-5p  |
| AGO2 | hsa-miR-6975-5p  |
| AGO2 | hsa-miR-1434-5p  |
| AGO2 | hsa-miR-6802-3p  |
| AGO2 | hsa-miR-365b-5p  |
| AGO2 | hsa-miR-6579-3p  |
| AGO2 | hsa-miR-6970-5p  |
| AGO2 | hsa-miR-409-5p   |
| AGO2 | hsa-miR-627      |
| AGO2 | hsa-miR-8813     |
| AGO2 | hsa-miR-5620-5p  |
| AGO2 | hsa-miR-7201-5p  |
| AGO2 | hsa-miR-3564     |
| AGO2 | hsa-miR-3618-3p  |
| AGO2 | hsa-miR-6315     |
| AGO2 | hsa-miR-7173-3p  |
| AGO2 | hsa-miR-1632-5p  |
| AGO2 | hsa-miR-7398q-3p |
| AGO2 | hsa-miR-679-3p   |
| AGO2 | hsa-miR-216c-5p  |
| AGO2 | hsa-miR-2285z    |
| AGO2 | hsa-miR-7357-3p  |
| AGO2 | hsa-miR-6973a-3p |
| AGO2 | hsa-miR-4703-3p  |
| AGO2 | hsa-miR-7849-3p  |
| AGO2 | hsa-miR-511-3p   |
| AGO2 | hsa-miR-345-3p   |
| AGO2 | hsa-miR-2464-5p  |
| AGO2 | hsa-miR-7214-5p  |
| AGO2 | hsa-miR-411a     |

|      |                 |
|------|-----------------|
| AGO2 | hsa-miR-1962    |
| AGO2 | hsa-miR-7204-5p |
| AGO2 | hsa-miR-8058    |
| AGO2 | hsa-miR-6935-5p |
| AGO2 | hsa-miR-6078    |
| AGO2 | hsa-miR-4323    |
| AGO2 | hsa-miR-8890    |
| AGO2 | hsa-miR-2350    |
| AGO2 | hsa-miR-6903-5p |
| AGO2 | hsa-miR-4493    |
| AGO2 | hsa-miR-2314    |
| AGO2 | hsa-miR-25-3p   |
| AGO2 | hsa-miR-626     |
| AGO2 | hsa-miR-4789-3p |
| AGO2 | hsa-miR-1596-5p |
| AGO2 | hsa-miR-6840-5p |
| AGO2 | hsa-miR-6969-3p |
| AGO2 | hsa-miR-136-5p  |
| AGO2 | hsa-miR-6827-5p |
| AGO2 | hsa-miR-1630    |
| AGO2 | hsa-miR-7091-3p |
| AGO2 | hsa-miR-642-3p  |
| AGO2 | hsa-miR-490-5p  |
| AGO2 | hsa-miR-671-5p  |
| AGO2 | hsa-miR-3621    |
| AGO2 | hsa-miR-6838-3p |
| AGO2 | hsa-miR-4684-3p |
| AGO2 | hsa-miR-2463    |
| AGO2 | hsa-miR-4693-3p |
| AGO2 | hsa-miR-1651-3p |
| AGO2 | hsa-miR-5623-5p |
| AGO2 | hsa-miR-1768    |
| AGO2 | hsa-miR-3557-3p |
| AGO2 | hsa-miR-2357    |
| AGO2 | hsa-miR-4446-5p |
| AGO2 | hsa-miR-6639-5p |
| AGO2 | hsa-miR-6768-5p |
| AGO2 | hsa-miR-3064-3p |
| AGO2 | hsa-miR-520     |
| AGO2 | hsa-miR-130b-3p |
| AGO2 | hsa-miR-3552    |
| AGO2 | hsa-miR-5101    |
| AGO2 | hsa-miR-623     |
| AGO2 | hsa-miR-8077    |
| AGO2 | hsa-miR-7646-3p |
| AGO2 | hsa-miR-29a-5p  |

|      |                  |
|------|------------------|
| AGO2 | hsa-miR-4273     |
| AGO2 | hsa-miR-6871-5p  |
| AGO2 | hsa-miR-6667-5p  |
| AGO2 | hsa-miR-548am-3p |
| AGO2 | hsa-miR-1954     |
| AGO2 | hsa-miR-6926-5p  |
| AGO2 | hsa-miR-4520-3p  |
| AGO2 | hsa-miR-493      |
| AGO2 | hsa-miR-2460     |
| AGO2 | hsa-miR-3194-5p  |
| AGO2 | hsa-miR-320-5p   |
| AGO2 | hsa-miR-3911     |
| AGO2 | hsa-miR-21-5p    |
| AGO2 | hsa-miR-5125     |
| AGO2 | hsa-miR-2451     |
| AGO2 | hsa-miR-5006-3p  |
| AGO2 | hsa-miR-1255a    |
| AGO2 | hsa-miR-7271-3p  |
| AGO2 | hsa-miR-7031-5p  |
| AGO2 | hsa-miR-3927-3p  |
| AGO2 | hsa-miR-4650-5p  |
| AGO2 | hsa-miR-6786-3p  |
| AGO2 | hsa-miR-2284ac   |
| AGO2 | hsa-miR-7659-5p  |
| AGO2 | hsa-miR-5124a    |
| AGO2 | hsa-miR-3135b    |
| AGO2 | hsa-miR-545-3p   |
| AGO2 | hsa-miR-501-3p   |
| AGO2 | hsa-miR-433-3p   |
| AGO2 | hsa-miR-7169-3p  |
| AGO2 | hsa-miR-132-3p   |
| AGO2 | hsa-miR-708-3p   |
| AGO2 | hsa-miR-659-3p   |
| AGO2 | hsa-miR-2339     |
| AGO2 | hsa-miR-677-3p   |
| AGO2 | hsa-miR-344b-3p  |
| AGO2 | hsa-miR-3680-5p  |
| AGO2 | hsa-miR-7039-5p  |
| AGO2 | hsa-miR-3665     |
| AGO2 | hsa-miR-1556     |
| AGO2 | hsa-miR-7312-5p  |
| AGO2 | hsa-miR-2305     |
| AGO2 | hsa-miR-2131-3p  |
| AGO2 | hsa-miR-7369-3p  |
| AGO2 | hsa-miR-27b-3p   |
| AGO2 | hsa-miR-6879-5p  |

|      |                   |
|------|-------------------|
| AGO2 | hsa-miR-4447      |
| AGO2 | hsa-miR-6525      |
| AGO2 | hsa-miR-4692      |
| AGO2 | hsa-miR-202-3p    |
| AGO2 | hsa-miR-3938-3p   |
| AGO2 | hsa-miR-6919-5p   |
| AGO2 | hsa-miR-2355-3p   |
| AGO2 | hsa-miR-3594-3p   |
| AGO2 | hsa-miR-7048-3p   |
| AGO2 | hsa-miR-468-5p    |
| AGO2 | hsa-miR-7371d-5p  |
| AGO2 | hsa-miR-1-2-5p    |
| AGO2 | hsa-miR-363-3p    |
| AGO2 | hsa-miR-488-3p    |
| AGO2 | hsa-miR-6550-5p   |
| AGO2 | hsa-miR-1689-5p   |
| AGO2 | hsa-miR-7398l-5p  |
| AGO2 | hsa-miR-105-5p    |
| AGO2 | hsa-miR-3074-2-3p |
| AGO2 | hsa-miR-6830-3p   |
| AGO2 | hsa-miR-1343      |
| AGO2 | hsa-miR-7074-5p   |
| AGO2 | hsa-miR-101-1-5p  |
| AGO2 | hsa-miR-769-5p    |
| AGO2 | hsa-miR-7020-3p   |
| AGO2 | hsa-miR-5586-3p   |
| AGO2 | hsa-miR-1183      |
| AGO2 | hsa-miR-201-5p    |
| AGO2 | hsa-miR-3586-3p   |
| AGO2 | hsa-miR-7282-5p   |
| AGO2 | hsa-miR-526b-5p   |
| AGO2 | hsa-miR-518g-3p   |
| AGO2 | hsa-miR-1416-3p   |
| AGO2 | hsa-miR-4513      |
| AGO2 | hsa-miR-1191a     |
| AGO2 | hsa-miR-1776      |
| AGO2 | hsa-miR-2917      |
| AGO2 | hsa-miR-7019-3p   |
| AGO2 | hsa-miR-6069      |
| AGO2 | hsa-miR-6857-5p   |
| AGO2 | hsa-miR-3611      |
| AGO2 | hsa-miR-5103      |
| AGO2 | hsa-miR-7641      |
| AGO2 | hsa-miR-4298      |
| AGO2 | hsa-miR-1756b     |
| AGO2 | hsa-miR-3126-5p   |

|      |                  |
|------|------------------|
| AGO2 | hsa-miR-6767-3p  |
| AGO2 | hsa-miR-2397-3p  |
| AGO2 | hsa-miR-4436b-3p |
| AGO2 | hsa-miR-6541     |
| AGO2 | hsa-miR-7394b-5p |
| AGO2 | hsa-miR-2389     |
| AGO2 | hsa-miR-2408     |
| AGO2 | hsa-miR-6694-3p  |
| AGO2 | hsa-miR-5582-5p  |
| AGO2 | hsa-miR-487a-5p  |
| AGO2 | hsa-miR-4708-3p  |
| AGO2 | hsa-miR-27       |
| AGO2 | hsa-miR-3916     |
| AGO2 | hsa-miR-6945-3p  |
| AGO2 | hsa-miR-693-3p   |
| AGO2 | hsa-miR-702-5p   |
| AGO2 | hsa-miR-7681-3p  |
| AGO2 | hsa-miR-516-3p   |
| AGO2 | hsa-miR-6587-5p  |
| AGO2 | hsa-miR-381-3p   |
| AGO2 | hsa-miR-4462     |
| AGO2 | hsa-miR-6951-5p  |
| AGO2 | hsa-miR-8894     |
| AGO2 | hsa-miR-6793-5p  |
| AGO2 | hsa-miR-7233-3p  |
| AGO2 | hsa-miR-6119-3p  |
| AGO2 | hsa-miR-5622-3p  |
| AGO2 | hsa-miR-1267     |
| AGO2 | hsa-miR-4766-5p  |
| AGO2 | hsa-miR-5089-3p  |
| AGO2 | hsa-miR-302b-3p  |
| AGO2 | hsa-miR-3472     |
| AGO2 | hsa-miR-6527     |
| AGO2 | hsa-miR-3618-5p  |
| AGO2 | hsa-miR-499-5p   |
| AGO2 | hsa-miR-7338-3p  |
| AGO2 | hsa-miR-1275     |
| AGO2 | hsa-miR-6865-5p  |
| AGO2 | hsa-miR-7384-3p  |
| AGO2 | hsa-miR-6858-3p  |
| AGO2 | hsa-miR-1255     |
| AGO2 | hsa-miR-214-3p   |
| AGO2 | hsa-miR-1633     |
| AGO2 | hsa-miR-3573-3p  |
| AGO2 | hsa-miR-487-5p   |
| AGO2 | hsa-miR-2396     |

|      |                  |
|------|------------------|
| AGO2 | hsa-miR-508-3p   |
| AGO2 | hsa-miR-291-5p   |
| AGO2 | hsa-miR-7246-5p  |
| AGO2 | hsa-miR-203b-3p  |
| AGO2 | hsa-miR-135-5p   |
| AGO2 | hsa-miR-7242-5p  |
| AGO2 | hsa-miR-2368-5p  |
| AGO2 | hsa-miR-370-3p   |
| AGO2 | hsa-miR-5011-3p  |
| AGO2 | hsa-miR-6640-5p  |
| AGO2 | hsa-miR-3121-3p  |
| AGO2 | hsa-miR-3092-3p  |
| AGO2 | hsa-miR-681      |
| AGO2 | hsa-miR-7163-3p  |
| AGO2 | hsa-miR-1710     |
| AGO2 | hsa-miR-7159-5p  |
| AGO2 | hsa-miR-455-3p.1 |
| AGO2 | hsa-miR-770-5p   |
| AGO2 | hsa-miR-495-5p   |
| AGO2 | hsa-miR-4258     |
| AGO2 | hsa-miR-2293     |
| AGO2 | hsa-miR-6812-5p  |
| AGO2 | hsa-miR-7a-1-3p  |
| AGO2 | hsa-miR-3072-3p  |
| AGO2 | hsa-miR-4317     |
| AGO2 | hsa-miR-302c-5p  |
| AGO2 | hsa-miR-7347-5p  |
| AGO2 | hsa-miR-6659-3p  |
| AGO2 | hsa-miR-4482-3p  |
| AGO2 | hsa-miR-6682-3p  |
| AGO2 | hsa-miR-221-5p   |
| AGO2 | hsa-miR-517-3p   |
| AGO2 | hsa-miR-7442-5p  |
| AGO2 | hsa-miR-8858     |
| AGO2 | hsa-miR-1255-5p  |
| AGO2 | hsa-miR-7666-5p  |
| AGO2 | hsa-miR-7369-5p  |
| AGO2 | hsa-miR-940      |
| AGO2 | hsa-miR-6814-5p  |
| AGO2 | hsa-miR-888-3p   |
| AGO2 | hsa-miR-7343-3p  |
| AGO2 | hsa-miR-7854-3p  |
| AGO2 | hsa-miR-1245a    |
| AGO2 | hsa-miR-677      |
| AGO2 | hsa-miR-451-3p   |
| AGO2 | hsa-miR-292-5p   |

|      |                 |
|------|-----------------|
| AGO2 | hsa-miR-1296-3p |
| AGO2 | hsa-miR-8827    |
| AGO2 | hsa-miR-6988-5p |
| AGO2 | hsa-miR-7181-3p |
| AGO2 | hsa-miR-1225    |
| AGO2 | hsa-miR-2447    |
| AGO2 | hsa-miR-2411-3p |
| AGO2 | hsa-miR-6358    |
| AGO2 | hsa-miR-499b-3p |
| AGO2 | hsa-miR-191-3p  |
| AGO2 | hsa-miR-4506    |
| AGO2 | hsa-miR-6623-3p |
| AGO2 | hsa-miR-499b-5p |
| AGO2 | hsa-miR-221-3p  |
| AGO2 | hsa-miR-6998-3p |
| AGO2 | hsa-miR-7347-3p |
| AGO2 | hsa-miR-6755-3p |
| AGO2 | hsa-miR-466-5p  |
| AGO2 | hsa-miR-221-3p  |
| AGO2 | hsa-miR-6993-5p |
| AGO2 | hsa-miR-516b-5p |
| AGO2 | hsa-miR-7350-3p |
| AGO2 | hsa-miR-6502-3p |
| AGO2 | hsa-miR-8893    |
| AGO2 | hsa-miR-7442-3p |
| AGO2 | hsa-miR-30      |
| AGO2 | hsa-miR-706     |
| AGO2 | hsa-miR-1723    |
| AGO2 | hsa-miR-8849    |
| AGO2 | hsa-miR-7200-5p |
| AGO2 | hsa-miR-3176    |
| AGO2 | hsa-miR-6775-3p |
| AGO2 | hsa-miR-7018-3p |
| AGO2 | hsa-miR-4757-3p |
| AGO2 | hsa-miR-218-5p  |
| AGO2 | hsa-miR-7307-3p |
| AGO2 | hsa-miR-7175-3p |
| AGO2 | hsa-miR-7703    |
| AGO2 | hsa-miR-1897-5p |
| AGO2 | hsa-miR-466g    |
| AGO2 | hsa-miR-105b    |
| AGO2 | hsa-miR-2338    |
| AGO2 | hsa-miR-183-3p  |
| AGO2 | hsa-miR-148b-3p |
| AGO2 | hsa-miR-516a-3p |
| AGO2 | hsa-miR-4772-3p |



|      |                   |
|------|-------------------|
| AGO2 | hsa-miR-7386j-3p  |
| AGO2 | hsa-miR-883b-5p   |
| AGO2 | hsa-miR-8838      |
| AGO2 | hsa-miR-3193      |
| AGO2 | hsa-miR-4284      |
| AGO2 | hsa-miR-7974      |
| AGO2 | hsa-miR-7469-5p   |
| AGO2 | hsa-let-7j-3p     |
| AGO2 | hsa-miR-8888      |
| AGO2 | hsa-miR-548c-3p   |
| AGO2 | hsa-miR-2318      |
| AGO2 | hsa-miR-7458-3p   |
| AGO2 | hsa-miR-6759-5p   |
| AGO2 | hsa-miR-6345      |
| AGO2 | hsa-miR-6760-5p   |
| AGO2 | hsa-miR-7330-3p   |
| AGO2 | hsa-miR-7382-3p   |
| AGO2 | hsa-miR-101b-3p.1 |
| AGO2 | hsa-miR-378a-5p   |
| AGO2 | hsa-miR-8899      |
| AGO2 | hsa-miR-7309-3p   |
| AGO2 | hsa-miR-290b-3p   |
| AGO2 | hsa-miR-496a-3p.1 |
| AGO2 | hsa-miR-7660-5p   |
| AGO2 | hsa-miR-6916-3p   |
| AGO2 | hsa-miR-3967      |
| AGO2 | hsa-miR-670-5p    |
| AGO2 | hsa-miR-4743-3p   |
| AGO2 | hsa-miR-5625-3p   |
| AGO2 | hsa-miR-216b      |
| AGO2 | hsa-miR-374a-3p   |
| AGO2 | hsa-miR-936       |
| AGO2 | hsa-miR-7351-3p   |
| AGO2 | hsa-miR-871-5p    |
| AGO2 | hsa-miR-6946-3p   |
| AGO2 | hsa-miR-3167-3p   |
| AGO2 | hsa-miR-7448-5p   |
| AGO2 | hsa-miR-7062-3p   |
| AGO2 | hsa-miR-7371e-3p  |
| AGO2 | hsa-miR-532-5p    |
| AGO2 | hsa-miR-6379      |
| AGO2 | hsa-miR-4664-5p   |
| AGO2 | hsa-miR-6789-5p   |
| AGO2 | hsa-miR-6864-5p   |
| AGO2 | hsa-miR-6912-3p   |
| AGO2 | hsa-miR-522-3p    |

|      |                      |
|------|----------------------|
| AGO2 | hsa-let-7            |
| AGO2 | hsa-miR-3140-3p      |
| AGO2 | hsa-miR-182-5p       |
| AGO2 | hsa-miR-374          |
| AGO2 | hsa-miR-6513-5p      |
| AGO2 | hsa-miR-4756-3p      |
| AGO2 | hsa-miR-516a         |
| AGO2 | hsa-miR-7651-3p      |
| AGO2 | hsa-miR-1667-3p      |
| AGO2 | hsa-miR-335-3p       |
| AGO2 | hsa-miR-374c-3p      |
| AGO2 | hsa-miR-8550         |
| AGO2 | hsa-miR-4651         |
| AGO2 | hsa-miR-4712-3p      |
| AGO2 | hsa-miR-2299-3p      |
| AGO2 | hsa-miR-6757-3p      |
| AGO2 | hsa-miR-1306-5p      |
| AGO2 | hsa-miR-1285-3p      |
| AGO2 | hsa-miR-199-5p       |
| AGO2 | hsa-miR-1668-5p      |
| AGO2 | hsa-miR-664-5p       |
| AGO2 | hsa-miR-497-5p       |
| AGO2 | hsa-miR-412-3p       |
| AGO2 | hsa-miR-8792         |
| AGO2 | hsa-miR-3125         |
| AGO2 | hsa-miR-340-5p       |
| AGO2 | hsa-miR-6944-5p      |
| AGO2 | hsa-miR-3102-3p.2-3p |
| AGO2 | hsa-miR-1835         |
| AGO2 | hsa-miR-4671-3p      |
| AGO2 | hsa-miR-1659         |
| AGO2 | hsa-miR-6513-3p      |
| AGO2 | hsa-miR-550a-3p      |
| AGO2 | hsa-miR-4772-5p      |
| AGO2 | hsa-miR-5123         |
| AGO2 | hsa-miR-30a-5p       |
| AGO2 | hsa-miR-148a-5p      |
| AGO2 | hsa-miR-1910-5p      |
| AGO2 | hsa-miR-7661-5p      |
| AGO2 | hsa-miR-7398o-5p     |
| AGO2 | hsa-miR-518          |
| AGO2 | hsa-miR-7375-3p      |
| AGO2 | hsa-miR-7371h-3p     |
| AGO2 | hsa-miR-432-5p       |
| AGO2 | hsa-miR-6939-3p      |
| AGO2 | hsa-miR-7379-5p      |

|      |                  |
|------|------------------|
| AGO2 | hsa-miR-4433a-3p |
| AGO2 | hsa-miR-7254-5p  |
| AGO2 | hsa-miR-668-3p   |
| AGO2 | hsa-miR-3094-3p  |
| AGO2 | hsa-miR-7028-3p  |
| AGO2 | hsa-miR-3928-3p  |
| AGO2 | hsa-miR-15       |
| AGO2 | hsa-miR-3660     |
| AGO2 | hsa-miR-2284x    |
| AGO2 | hsa-miR-6810-5p  |
| AGO2 | hsa-miR-181c-5p  |
| AGO2 | hsa-miR-1224-5p  |
| AGO2 | hsa-miR-130-3p   |
| AGO2 | hsa-miR-4764-3p  |
| AGO2 | hsa-miR-874-5p   |
| AGO2 | hsa-miR-375      |
| AGO2 | hsa-miR-1805-5p  |
| AGO2 | hsa-miR-7288-3p  |
| AGO2 | hsa-miR-6544-3p  |
| AGO2 | hsa-miR-301-5p   |
| AGO2 | hsa-miR-135-3p   |
| AGO2 | hsa-miR-376-3p   |
| AGO2 | hsa-miR-3190-5p  |
| AGO2 | hsa-miR-6856-5p  |
| AGO2 | hsa-miR-505-3p.2 |
| AGO2 | hsa-miR-2394     |
| AGO2 | hsa-miR-6785-3p  |
| AGO2 | hsa-miR-7151-3p  |
| AGO2 | hsa-miR-3685     |
| AGO2 | hsa-miR-486-3p   |
| AGO2 | hsa-miR-4701-3p  |
| AGO2 | hsa-miR-6728-5p  |
| AGO2 | hsa-miR-576-5p   |
| AGO2 | hsa-miR-924      |
| AGO2 | hsa-miR-3202     |
| AGO2 | hsa-miR-6822-5p  |
| AGO2 | hsa-miR-7216-3p  |
| AGO2 | hsa-miR-7214-3p  |
| AGO2 | hsa-miR-7378-5p  |
| AGO2 | hsa-miR-579-3p   |
| AGO2 | hsa-miR-1238-3p  |
| AGO2 | hsa-miR-6788-5p  |
| AGO2 | hsa-miR-6500-3p  |
| AGO2 | hsa-miR-2388-5p  |
| AGO2 | hsa-miR-7340-3p  |
| AGO2 | hsa-miR-363-5p   |

|      |                 |
|------|-----------------|
| AGO2 | hsa-miR-152     |
| AGO2 | hsa-miR-24-5p   |
| AGO2 | hsa-miR-346-5p  |
| AGO2 | hsa-miR-4799-5p |
| AGO2 | hsa-miR-181c-3p |
| AGO2 | hsa-miR-3187-3p |
| AGO2 | hsa-miR-5107-5p |
| AGO2 | hsa-miR-2334    |
| AGO2 | hsa-miR-7310-5p |
| AGO2 | hsa-miR-539-5p  |
| AGO2 | hsa-miR-7087-3p |
| AGO2 | hsa-miR-5196-5p |
| AGO2 | hsa-miR-1618-5p |
| AGO2 | hsa-miR-204-5p  |
| AGO2 | hsa-miR-7978    |
| AGO2 | hsa-miR-698-5p  |
| AGO2 | hsa-miR-212-3p  |
| AGO2 | hsa-miR-935     |
| AGO2 | hsa-miR-577-3p  |
| AGO2 | hsa-miR-3200-5p |
| AGO2 | hsa-miR-891     |
| AGO2 | hsa-miR-2433    |
| AGO2 | hsa-miR-7262-3p |
| AGO2 | hsa-miR-140-3p  |
| AGO2 | hsa-miR-196-3p  |
| AGO2 | hsa-miR-6333    |
| AGO2 | hsa-miR-4293    |
| AGO2 | hsa-miR-937-3p  |
| AGO2 | hsa-miR-2435    |
| AGO2 | hsa-miR-7368-3p |
| AGO2 | hsa-miR-878-5p  |
| AGO2 | hsa-miR-670-3p  |
| AGO2 | hsa-miR-466i-3p |
| AGO2 | hsa-miR-7460-5p |
| AGO2 | hsa-miR-6550-3p |
| AGO2 | hsa-miR-371a-5p |
| AGO2 | hsa-miR-423-3p  |
| AGO2 | hsa-miR-3922-3p |
| AGO2 | hsa-miR-6885-3p |
| AGO2 | hsa-miR-3583-3p |
| AGO2 | hsa-miR-8908f   |
| AGO2 | hsa-miR-6692-5p |
| AGO2 | hsa-miR-548b-5p |
| AGO2 | hsa-miR-4434    |
| AGO2 | hsa-miR-185-5p  |
| AGO2 | hsa-miR-6362    |

|      |                    |
|------|--------------------|
| AGO2 | hsa-miR-7094b-2-5p |
| AGO2 | hsa-miR-557        |
| AGO2 | hsa-miR-1782       |
| AGO2 | hsa-miR-7674-5p    |
| AGO2 | hsa-miR-3090-3p    |
| AGO2 | hsa-miR-6776-3p    |
| AGO2 | hsa-miR-6901-3p    |
| AGO2 | hsa-miR-4653-3p    |
| AGO2 | hsa-miR-1457       |
| AGO2 | hsa-miR-146        |
| AGO2 | hsa-miR-549-3p     |
| AGO2 | hsa-miR-27b-5p     |
| AGO2 | hsa-miR-7354-5p    |
| AGO2 | hsa-miR-6865-3p    |
| AGO2 | hsa-miR-186-5p     |
| AGO2 | hsa-miR-181-3p     |
| AGO2 | hsa-miR-553        |
| AGO2 | hsa-miR-2380       |
| AGO2 | hsa-miR-6529-3p    |
| AGO2 | hsa-miR-514-3p     |
| AGO2 | hsa-miR-384-3p     |
| AGO2 | hsa-miR-431-5p     |
| AGO2 | hsa-miR-617        |
| AGO2 | hsa-miR-600        |
| AGO2 | hsa-miR-6724-5p    |
| AGO2 | hsa-miR-2466-5p    |
| AGO2 | hsa-miR-5008-3p    |
| AGO2 | hsa-miR-2284aa     |
| AGO2 | hsa-miR-7251-5p    |
| AGO2 | hsa-miR-4753-3p    |
| AGO2 | hsa-miR-6612-5p    |
| AGO2 | hsa-miR-6727-3p    |
| AGO2 | hsa-miR-7844-5p    |
| AGO2 | hsa-miR-1239       |
| AGO2 | hsa-miR-483-3p.1   |
| AGO2 | hsa-miR-4689       |
| AGO2 | hsa-miR-7279-5p    |
| AGO2 | hsa-miR-1781-3p    |
| AGO2 | hsa-miR-324        |
| AGO2 | hsa-miR-23         |
| AGO2 | hsa-miR-4477b      |
| AGO2 | hsa-miR-873a-3p    |
| AGO2 | hsa-miR-8823       |
| AGO2 | hsa-miR-8836       |
| AGO2 | hsa-miR-548x-5p    |
| AGO2 | hsa-miR-4781-3p    |

|      |                   |
|------|-------------------|
| AGO2 | hsa-miR-518-5p    |
| AGO2 | hsa-miR-630       |
| AGO2 | hsa-miR-340-3p    |
| AGO2 | hsa-miR-6813-3p   |
| AGO2 | hsa-miR-611       |
| AGO2 | hsa-miR-6839-3p   |
| AGO2 | hsa-miR-657       |
| AGO2 | hsa-miR-879-3p    |
| AGO2 | hsa-miR-494       |
| AGO2 | hsa-miR-1842      |
| AGO2 | hsa-miR-2276-3p   |
| AGO2 | hsa-miR-6987-3p   |
| AGO2 | hsa-miR-3136-5p   |
| AGO2 | hsa-miR-2325c     |
| AGO2 | hsa-miR-1188-5p   |
| AGO2 | hsa-miR-466       |
| AGO2 | hsa-miR-5120      |
| AGO2 | hsa-miR-5621-3p   |
| AGO2 | hsa-miR-4746-3p   |
| AGO2 | hsa-miR-6340      |
| AGO2 | hsa-miR-7198-5p   |
| AGO2 | hsa-miR-2387      |
| AGO2 | hsa-miR-6323      |
| AGO2 | hsa-miR-1744-3p   |
| AGO2 | hsa-miR-6951-3p   |
| AGO2 | hsa-miR-194-2-3p  |
| AGO2 | hsa-miR-1843a-5p  |
| AGO2 | hsa-miR-29a-3p    |
| AGO2 | hsa-miR-1264-5p   |
| AGO2 | hsa-miR-5689      |
| AGO2 | hsa-miR-7683-3p   |
| AGO2 | hsa-miR-6935-3p   |
| AGO2 | hsa-miR-506-3p    |
| AGO2 | hsa-miR-7004-3p   |
| AGO2 | hsa-miR-4520-2-3p |
| AGO2 | hsa-miR-320a      |
| AGO2 | hsa-miR-7-5p      |
| AGO2 | hsa-miR-3529-3p   |
| AGO2 | hsa-miR-7476-3p   |
| AGO2 | hsa-miR-370       |
| AGO2 | hsa-miR-1293      |
| AGO2 | hsa-miR-8059      |
| AGO2 | hsa-miR-6800-3p   |
| AGO2 | hsa-miR-6897-5p   |
| AGO2 | hsa-miR-5096      |
| AGO2 | hsa-miR-6923-3p   |

|      |                  |
|------|------------------|
| AGO2 | hsa-miR-224-5p   |
| AGO2 | hsa-miR-4728-3p  |
| AGO2 | hsa-miR-637      |
| AGO2 | hsa-miR-1902     |
| AGO2 | hsa-miR-507b     |
| AGO2 | hsa-miR-488-5p   |
| AGO2 | hsa-miR-327      |
| AGO2 | hsa-miR-7298-3p  |
| AGO2 | hsa-miR-4453     |
| AGO2 | hsa-miR-4727-3p  |
| AGO2 | hsa-miR-7240-5p  |
| AGO2 | hsa-miR-4439     |
| AGO2 | hsa-miR-3961     |
| AGO2 | hsa-miR-6884-3p  |
| AGO2 | hsa-miR-365-5p   |
| AGO2 | hsa-miR-4467     |
| AGO2 | hsa-miR-4257     |
| AGO2 | hsa-miR-25-3p    |
| AGO2 | hsa-miR-3940-5p  |
| AGO2 | hsa-miR-7013-3p  |
| AGO2 | hsa-miR-30c-3p   |
| AGO2 | hsa-miR-2458     |
| AGO2 | hsa-miR-8106     |
| AGO2 | hsa-miR-760-5p   |
| AGO2 | hsa-miR-7684-5p  |
| AGO2 | hsa-miR-2390     |
| AGO2 | hsa-miR-516a-5p  |
| AGO2 | hsa-miR-6660-3p  |
| AGO2 | hsa-miR-6120-5p  |
| AGO2 | hsa-miR-7012-3p  |
| AGO2 | hsa-miR-6748-3p  |
| AGO2 | hsa-miR-656-3p   |
| AGO2 | hsa-miR-4641     |
| AGO2 | hsa-miR-8055     |
| AGO2 | hsa-miR-2432     |
| AGO2 | hsa-miR-1545a-3p |
| AGO2 | hsa-miR-3473c    |
| AGO2 | hsa-miR-548ap-5p |
| AGO2 | hsa-miR-3062-5p  |
| AGO2 | hsa-miR-7005-3p  |
| AGO2 | hsa-miR-686      |
| AGO2 | hsa-miR-4739     |
| AGO2 | hsa-miR-586      |
| AGO2 | hsa-miR-7385d-3p |
| AGO2 | hsa-miR-5579-3p  |
| AGO2 | hsa-miR-3606-5p  |

|      |                    |
|------|--------------------|
| AGO2 | hsa-miR-3136-5p    |
| AGO2 | hsa-miR-450a-1-3p  |
| AGO2 | hsa-miR-6558-5p    |
| AGO2 | hsa-miR-512-3p     |
| AGO2 | hsa-miR-1684-5p    |
| AGO2 | hsa-miR-7a-2-3p    |
| AGO2 | hsa-miR-344d-2-5p  |
| AGO2 | hsa-miR-1252-3p    |
| AGO2 | hsa-miR-5088-3p    |
| AGO2 | hsa-miR-135a-23-3p |
| AGO2 | hsa-miR-372        |
| AGO2 | hsa-miR-2359       |
| AGO2 | hsa-miR-2117       |
| AGO2 | hsa-miR-7180-3p    |
| AGO2 | hsa-miR-7304-5p    |
| AGO2 | hsa-miR-2299-5p    |
| AGO2 | hsa-miR-6637-3p    |
| AGO2 | hsa-miR-34c-5p     |
| AGO2 | hsa-miR-4745-5p    |
| AGO2 | hsa-miR-365-12-5p  |
| AGO2 | hsa-miR-8485       |
| AGO2 | hsa-miR-3692-3p    |
| AGO2 | hsa-miR-8885       |
| AGO2 | hsa-miR-6758-5p    |
| AGO2 | hsa-miR-3606-3p    |
| AGO2 | hsa-miR-6418-5p    |
| AGO2 | hsa-miR-3146       |
| AGO2 | hsa-miR-3473be     |
| AGO2 | hsa-miR-6582-5p    |
| AGO2 | hsa-miR-8904b      |
| AGO2 | hsa-miR-3058-5p    |
| AGO2 | hsa-miR-150-3p     |
| AGO2 | hsa-miR-669k-5p    |
| AGO2 | hsa-miR-135ab-3p   |
| AGO2 | hsa-miR-5700       |
| AGO2 | hsa-miR-7009-5p    |
| AGO2 | hsa-miR-5681b      |
| AGO2 | hsa-miR-3143       |
| AGO2 | hsa-miR-290b-5p    |
| AGO2 | hsa-miR-1739       |
| AGO2 | hsa-miR-6851-3p    |
| AGO2 | hsa-miR-1-5p       |
| AGO2 | hsa-miR-298-3p     |
| AGO2 | hsa-miR-7685-3p    |
| AGO2 | hsa-miR-6938-3p    |
| AGO2 | hsa-miR-1788-5p    |



|      |                   |
|------|-------------------|
| AGO2 | hsa-miR-342-3p    |
| AGO2 | hsa-miR-6840-3p   |
| AGO2 | hsa-miR-8898      |
| AGO2 | hsa-miR-3616-3p   |
| AGO2 | hsa-miR-4507      |
| AGO2 | hsa-miR-3572-5p   |
| AGO2 | hsa-miR-7466-3p   |
| AGO2 | hsa-miR-2308      |
| AGO2 | hsa-miR-628-3p    |
| AGO2 | hsa-miR-1784-5p   |
| AGO2 | hsa-miR-6600-3p   |
| AGO2 | hsa-miR-7365-3p   |
| AGO2 | hsa-miR-1552-3p   |
| AGO2 | hsa-miR-6536      |
| AGO2 | hsa-miR-3105-3p   |
| AGO2 | hsa-miR-3150b-5p  |
| AGO2 | hsa-miR-2482      |
| AGO2 | hsa-miR-3577-5p   |
| AGO2 | hsa-miR-3141      |
| AGO2 | hsa-miR-7398-5p   |
| AGO2 | hsa-miR-6808-5p   |
| AGO2 | hsa-miR-3150a-3p  |
| AGO2 | hsa-miR-702-3p    |
| AGO2 | hsa-miR-1643b-5p  |
| AGO2 | hsa-miR-199b-3-5p |
| AGO2 | hsa-miR-5618-5p   |
| AGO2 | hsa-miR-7337-3p   |
| AGO2 | hsa-miR-1583      |
| AGO2 | hsa-miR-6813-5p   |
| AGO2 | hsa-miR-1545b-5p  |
| AGO2 | hsa-miR-612       |
| AGO2 | hsa-miR-302d-3p   |
| AGO2 | hsa-miR-650d      |
| AGO2 | hsa-miR-2468      |
| AGO2 | hsa-miR-6924-5p   |
| AGO2 | hsa-miR-763       |
| AGO2 | hsa-miR-7360-3p   |
| AGO2 | hsa-miR-7005-5p   |
| AGO2 | hsa-miR-212-3p    |
| AGO2 | hsa-let-7b-3p     |
| AGO2 | hsa-miR-1236-5p   |
| AGO2 | hsa-miR-493-5p    |
| AGO2 | hsa-miR-210       |
| AGO2 | hsa-miR-4761-3p   |
| AGO2 | hsa-miR-219-2-3p  |
| AGO2 | hsa-miR-7389-5p   |

|      |                  |
|------|------------------|
| AGO2 | hsa-miR-6874-5p  |
| AGO2 | hsa-miR-635      |
| AGO2 | hsa-miR-1323-5p  |
| AGO2 | hsa-miR-7039-3p  |
| AGO2 | hsa-miR-7211-3p  |
| AGO2 | hsa-miR-1227-3p  |
| AGO2 | hsa-miR-516      |
| AGO2 | hsa-miR-99-3p    |
| AGO2 | hsa-miR-8088     |
| AGO2 | hsa-miR-4511     |
| AGO2 | hsa-miR-7065-3p  |
| AGO2 | hsa-miR-3072     |
| AGO2 | hsa-miR-4697-3p  |
| AGO2 | hsa-miR-1952     |
| AGO2 | hsa-miR-19b-3p   |
| AGO2 | hsa-miR-7682-3p  |
| AGO2 | hsa-miR-7035-3p  |
| AGO2 | hsa-miR-497-5p   |
| AGO2 | hsa-miR-205-3p   |
| AGO2 | hsa-miR-7395-3p  |
| AGO2 | hsa-miR-29a-1-5p |
| AGO2 | hsa-miR-7386d-5p |
| AGO2 | hsa-miR-2367-3p  |
| AGO2 | hsa-miR-7283-3p  |
| AGO2 | hsa-miR-769-3p   |
| AGO2 | hsa-miR-4776-3p  |
| AGO2 | hsa-miR-1735     |
| AGO2 | hsa-miR-4518     |
| AGO2 | hsa-miR-1249-3p  |
| AGO2 | hsa-miR-4728-5p  |
| AGO2 | hsa-miR-7203-5p  |
| AGO2 | hsa-miR-1740-3p  |
| AGO2 | hsa-miR-669b-5p  |
| AGO2 | hsa-miR-1683     |
| AGO2 | hsa-miR-7049-5p  |
| AGO2 | hsa-miR-7111-3p  |
| AGO2 | hsa-miR-3966     |
| AGO2 | hsa-miR-1894-3p  |
| AGO2 | hsa-miR-146a-3p  |
| AGO2 | hsa-miR-7197-5p  |
| AGO2 | hsa-miR-6739-5p  |
| AGO2 | hsa-miR-1680-5p  |
| AGO2 | hsa-miR-3601     |
| AGO2 | hsa-miR-4524a-5p |
| AGO2 | hsa-miR-4460     |
| AGO2 | hsa-miR-6954-3p  |

|          |                  |
|----------|------------------|
| AGO2     | hsa-miR-7203-3p  |
| AGO2     | hsa-miR-3189-3p  |
| AGO2     | hsa-miR-1456-3p  |
| AGO2     | hsa-miR-2317     |
| AGO2     | hsa-miR-30e      |
| AGO2     | hsa-miR-7062-5p  |
| AGO2     | hsa-miR-3084a-5p |
| AGO2     | hsa-miR-541-3p   |
| AGO2     | hsa-miR-7188-3p  |
| AGO2     | hsa-miR-8079     |
| AGO2     | hsa-miR-3662     |
| AGO2     | hsa-let-7a-2-3p  |
| AGO2     | hsa-miR-98-3p    |
| AGO2     | hsa-miR-8054     |
| AGO2     | hsa-miR-582-5p   |
| AGO2     | hsa-miR-151a-5p  |
| AGO2     | hsa-miR-133c     |
| AGO2     | hsa-miR-1943-5p  |
| AGO2     | hsa-miR-548m     |
| AGO2     | hsa-miR-548i-3p  |
| AGO2     | hsa-miR-7032-3p  |
| AGO2     | hsa-miR-193b-5p  |
| AGO2     | hsa-miR-8115     |
| AGO2     | hsa-let-7f-2-3p  |
| AGO2     | hsa-miR-7042-5p  |
| AGO2     | hsa-miR-3653-5p  |
| AGO2     | hsa-miR-6966-3p  |
| AGO2     | hsa-miR-4678     |
| AGO2     | hsa-miR-200c-3p  |
| AGO2     | hsa-miR-6328     |
| AGO2     | hsa-miR-4288     |
| AGO2     | hsa-miR-345-5p   |
| AGO2     | hsa-miR-7114-5p  |
| AGO2     | hsa-miR-1237-3p  |
| AGO2     | hsa-miR-3121-5p  |
| AGO2     | hsa-miR-3689b-5p |
| AGO2     | hsa-miR-2483-5p  |
| AGO2     | hsa-miR-4263     |
| AGO2     | hsa-miR-548g-5p  |
| AGO2     | hsa-miR-6908-3p  |
| AGO2     | hsa-miR-4800-3p  |
| AGO2     | hsa-miR-591      |
| C17orf85 | hsa-miR-4716-5p  |
| C17orf85 | hsa-miR-548z     |
| C17orf85 | hsa-miR-7198-5p  |
| C17orf85 | hsa-miR-643      |

|          |                  |
|----------|------------------|
| C17orf85 | hsa-miR-3134     |
| C17orf85 | hsa-miR-195-5p   |
| C17orf85 | hsa-miR-518c-5p  |
| C17orf85 | hsa-miR-6790-5p  |
| C17orf85 | hsa-miR-6868-5p  |
| C17orf85 | hsa-miR-3129-3p  |
| C17orf85 | hsa-miR-8879     |
| C17orf85 | hsa-miR-2425-5p  |
| C17orf85 | hsa-miR-1252-3p  |
| C17orf85 | hsa-miR-4524b-3p |
| C17orf85 | hsa-miR-8905     |
| C17orf85 | hsa-miR-369-5p   |
| C17orf85 | hsa-miR-8119     |
| C17orf85 | hsa-miR-6958-5p  |
| C17orf85 | hsa-miR-1626-3p  |
| C17orf85 | hsa-miR-467g     |
| C17orf85 | hsa-miR-6384     |
| C17orf85 | hsa-miR-6805-5p  |
| C17orf85 | hsa-miR-7460-3p  |
| C17orf85 | hsa-miR-5001-5p  |
| C17orf85 | hsa-miR-7188-3p  |
| C17orf85 | hsa-miR-1251     |
| C17orf85 | hsa-miR-2368-5p  |
| C17orf85 | hsa-miR-1968-3p  |
| C17orf85 | hsa-miR-101-3p   |
| C17orf85 | hsa-miR-20-5p    |
| C17orf85 | hsa-miR-4271     |
| C17orf85 | hsa-miR-365a-3p  |
| C17orf85 | hsa-miR-513a     |
| C17orf85 | hsa-miR-576-5p   |
| C17orf85 | hsa-miR-429-3p   |
| C17orf85 | hsa-miR-3110-3p  |
| C17orf85 | hsa-miR-133      |
| C17orf85 | hsa-miR-553      |
| C17orf85 | hsa-miR-4288     |
| C17orf85 | hsa-miR-548y     |
| C17orf85 | hsa-miR-103-3p   |
| C17orf85 | hsa-miR-361-5p   |
| C17orf85 | hsa-miR-6952-5p  |
| C17orf85 | hsa-miR-141-3p   |
| C17orf85 | hsa-miR-944      |
| C17orf85 | hsa-miR-27a-3p   |
| C17orf85 | hsa-miR-185-3p   |
| C17orf85 | hsa-miR-92       |
| C17orf85 | hsa-miR-1292-3p  |
| C17orf85 | hsa-miR-1258-5p  |

|          |                  |
|----------|------------------|
| C17orf85 | hsa-miR-454-3p   |
| C17orf85 | hsa-miR-4783-5p  |
| C17orf85 | hsa-miR-6125     |
| C17orf85 | hsa-miR-323b-5p  |
| C17orf85 | hsa-miR-3604     |
| C17orf85 | hsa-miR-5589-5p  |
| C17orf85 | hsa-miR-377-3p   |
| C17orf85 | hsa-miR-592      |
| C17orf85 | hsa-miR-7225-3p  |
| C17orf85 | hsa-miR-1343     |
| C17orf85 | hsa-miR-99a-3p   |
| C17orf85 | hsa-miR-760-3p   |
| C17orf85 | hsa-miR-6806-3p  |
| C17orf85 | hsa-miR-3680-3p  |
| C17orf85 | hsa-miR-4437     |
| C17orf85 | hsa-miR-292b-3p  |
| C17orf85 | hsa-miR-384-5p   |
| C17orf85 | hsa-miR-3921     |
| C17orf85 | hsa-miR-101-2-5p |
| C17orf85 | hsa-miR-548h-5p  |
| C17orf85 | hsa-miR-147a     |
| C17orf85 | hsa-miR-488-3p   |
| C17orf85 | hsa-miR-6715-5p  |
| C17orf85 | hsa-miR-4764-3p  |
| C17orf85 | hsa-miR-5193     |
| C17orf85 | hsa-miR-518g-3p  |
| C17orf85 | hsa-miR-5685     |
| C17orf85 | hsa-miR-144-5p   |
| C17orf85 | hsa-miR-2347     |
| C17orf85 | hsa-miR-324-3p   |
| C17orf85 | hsa-miR-3060-5p  |
| C17orf85 | hsa-miR-7051-5p  |
| C17orf85 | hsa-miR-6871-5p  |
| C17orf85 | hsa-miR-766-3p   |
| C17orf85 | hsa-miR-7216-5p  |
| C17orf85 | hsa-miR-30-5p    |
| C17orf85 | hsa-miR-1228-3p  |
| C17orf85 | hsa-miR-1843b-5p |
| C17orf85 | hsa-miR-526      |
| C17orf85 | hsa-miR-141-3p   |
| C17orf85 | hsa-miR-2467-3p  |
| C17orf85 | hsa-miR-548f-5p  |
| C17orf85 | hsa-miR-4696     |
| C17orf85 | hsa-miR-342-3p   |
| C17orf85 | hsa-miR-7005-5p  |
| C17orf85 | hsa-miR-6864-3p  |

|          |                 |
|----------|-----------------|
| C17orf85 | hsa-miR-291b-3p |
| C17orf85 | hsa-miR-6932-5p |
| C17orf85 | hsa-miR-8880    |
| C17orf85 | hsa-miR-153-5p  |
| C17orf85 | hsa-miR-7213-3p |
| C17orf85 | hsa-miR-7331-5p |
| C17orf85 | hsa-miR-6813-3p |
| C17orf85 | hsa-miR-145-3p  |
| C17orf85 | hsa-miR-4314    |
| C17orf85 | hsa-miR-1296    |
| C17orf85 | hsa-miR-3057-3p |
| C17orf85 | hsa-miR-4640-5p |
| C17orf85 | hsa-miR-17      |
| C17orf85 | hsa-miR-697     |
| C17orf85 | hsa-miR-6837-3p |
| C17orf85 | hsa-miR-7117-5p |
| C17orf85 | hsa-miR-548j-3p |
| C17orf85 | hsa-miR-145-5p  |
| C17orf85 | hsa-miR-1249-3p |
| C17orf85 | hsa-let-7g-3p   |
| C17orf85 | hsa-miR-297     |
| C17orf85 | hsa-miR-6744-5p |
| C17orf85 | hsa-miR-5186    |
| C17orf85 | hsa-miR-4727-5p |
| C17orf85 | hsa-miR-579-3p  |
| C17orf85 | hsa-miR-5681b   |
| C17orf85 | hsa-miR-6069    |
| C17orf85 | hsa-miR-2894    |
| C17orf85 | hsa-miR-7076-3p |
| C17orf85 | hsa-miR-6416-3p |
| C17orf85 | hsa-miR-150-3p  |
| C17orf85 | hsa-miR-641     |
| C17orf85 | hsa-miR-6831-5p |
| C17orf85 | hsa-miR-133a-5p |
| C17orf85 | hsa-miR-1252    |
| C17orf85 | hsa-miR-7656-3p |
| C17orf85 | hsa-miR-6752-3p |
| C17orf85 | hsa-miR-216b-5p |
| C17orf85 | hsa-miR-548x-5p |
| C17orf85 | hsa-miR-3678-3p |
| C17orf85 | hsa-miR-4487    |
| C17orf85 | hsa-miR-7065-5p |
| C17orf85 | hsa-miR-599-3p  |
| C17orf85 | hsa-miR-6832-3p |
| C17orf85 | hsa-miR-7085-5p |
| C17orf85 | hsa-miR-4296    |

|          |                   |
|----------|-------------------|
| C17orf85 | hsa-miR-7221-3p   |
| C17orf85 | hsa-miR-4645-5p   |
| C17orf85 | hsa-miR-7111-5p   |
| C17orf85 | hsa-miR-7010-3p   |
| C17orf85 | hsa-miR-1903      |
| C17orf85 | hsa-miR-2891      |
| C17orf85 | hsa-miR-3177-5p   |
| C17orf85 | hsa-miR-4725-5p   |
| C17orf85 | hsa-miR-138-3p    |
| C17orf85 | hsa-miR-4690-3p   |
| C17orf85 | hsa-miR-4538      |
| C17orf85 | hsa-miR-4520-2-3p |
| C17orf85 | hsa-miR-513a-3p   |
| C17orf85 | hsa-miR-708-3p    |
| C17orf85 | hsa-miR-802-5p    |
| C17orf85 | hsa-miR-9500      |
| C17orf85 | hsa-miR-6937-3p   |
| C17orf85 | hsa-miR-3675-3p   |
| C17orf85 | hsa-miR-3074-3p   |
| C17orf85 | hsa-miR-7011-3p   |
| C17orf85 | hsa-miR-669p-3p   |
| C17orf85 | hsa-miR-4750-3p   |
| C17orf85 | hsa-miR-4302      |
| C17orf85 | hsa-miR-1-3p      |
| C17orf85 | hsa-miR-4427      |
| C17orf85 | hsa-miR-3620-5p   |
| C17orf85 | hsa-miR-1816      |
| C17orf85 | hsa-miR-6858-5p   |
| C17orf85 | hsa-let-7a-2-3p   |
| C17orf85 | hsa-miR-18-5p     |
| C17orf85 | hsa-miR-343       |
| C17orf85 | hsa-miR-1286      |
| C17orf85 | hsa-miR-3072-5p   |
| C17orf85 | hsa-miR-146       |
| C17orf85 | hsa-miR-6732-3p   |
| C17orf85 | hsa-miR-1243-5p   |
| C17orf85 | hsa-miR-3911      |
| C17orf85 | hsa-miR-325       |
| C17orf85 | hsa-miR-6972-5p   |
| C17orf85 | hsa-miR-128-5p    |
| C17orf85 | hsa-miR-7235-5p   |
| C17orf85 | hsa-miR-380-3p    |
| C17orf85 | hsa-miR-883-5p    |
| C17orf85 | hsa-miR-4728-5p   |
| C17orf85 | hsa-miR-2909      |
| C17orf85 | hsa-miR-2460      |

|          |                  |
|----------|------------------|
| C17orf85 | hsa-miR-6906-5p  |
| C17orf85 | hsa-miR-3590-3p  |
| C17orf85 | hsa-miR-1273h-5p |
| C17orf85 | hsa-miR-344g-3p  |
| C17orf85 | hsa-miR-632      |
| C17orf85 | hsa-miR-17-5p    |
| C17orf85 | hsa-miR-509-3p   |
| C17orf85 | hsa-miR-6893-5p  |
| C17orf85 | hsa-miR-421-3p   |
| C17orf85 | hsa-miR-2419-5p  |
| C17orf85 | hsa-miR-329-5p   |
| C17orf85 | hsa-miR-6216     |
| C17orf85 | hsa-miR-7020-5p  |
| C17orf85 | hsa-miR-340-3p   |
| C17orf85 | hsa-miR-499-5p   |
| C17orf85 | hsa-miR-1981-3p  |
| C17orf85 | hsa-miR-4433b-3p |
| C17orf85 | hsa-miR-463-3p   |
| C17orf85 | hsa-miR-4530     |
| C17orf85 | hsa-miR-3098-3p  |
| C17orf85 | hsa-miR-184-5p   |
| C17orf85 | hsa-miR-135-3p   |
| C17orf85 | hsa-miR-4642     |
| C17orf85 | hsa-miR-320-3p   |
| C17orf85 | hsa-miR-485      |
| C17orf85 | hsa-miR-942      |
| C17orf85 | hsa-miR-2467-5p  |
| C17orf85 | hsa-miR-7683-5p  |
| C17orf85 | hsa-miR-7681-5p  |
| C17orf85 | hsa-miR-6087     |
| C17orf85 | hsa-miR-376a-5p  |
| C17orf85 | hsa-miR-4287     |
| C17orf85 | hsa-miR-593-3p   |
| C17orf85 | hsa-miR-549-3p   |
| C17orf85 | hsa-miR-8873b    |
| C17orf85 | hsa-miR-597-3p   |
| C17orf85 | hsa-miR-506-5p   |
| C17orf85 | hsa-miR-8057     |
| C17orf85 | hsa-miR-637      |
| C17orf85 | hsa-miR-3184-3p  |
| C17orf85 | hsa-miR-7224-3p  |
| C17orf85 | hsa-miR-597-5p   |
| C17orf85 | hsa-miR-483-5p   |
| C17orf85 | hsa-miR-579      |
| C17orf85 | hsa-miR-1245-3p  |
| C17orf85 | hsa-miR-181c-3p  |



|          |                   |
|----------|-------------------|
| C17orf85 | hsa-miR-4749-5p   |
| C17orf85 | hsa-miR-3928-3p   |
| C17orf85 | hsa-miR-3561-3p   |
| C17orf85 | hsa-miR-7053-3p   |
| C17orf85 | hsa-miR-4472      |
| C17orf85 | hsa-miR-7185-5p   |
| C17orf85 | hsa-miR-7111-3p   |
| C17orf85 | hsa-miR-7236-5p   |
| C17orf85 | hsa-miR-7182-3p   |
| C17orf85 | hsa-miR-4422      |
| C17orf85 | hsa-miR-5000-5p   |
| C17orf85 | hsa-miR-6345      |
| C17orf85 | hsa-miR-191-5p    |
| C17orf85 | hsa-miR-1231-3p   |
| C17orf85 | hsa-miR-6808-5p   |
| C17orf85 | hsa-miR-6315      |
| C17orf85 | hsa-miR-1897-5p   |
| C17orf85 | hsa-miR-8825      |
| C17orf85 | hsa-miR-6949-3p   |
| C17orf85 | hsa-miR-212-3p    |
| C17orf85 | hsa-miR-680       |
| C17orf85 | hsa-miR-7171-3p   |
| C17orf85 | hsa-miR-5696      |
| C17orf85 | hsa-miR-618       |
| C17orf85 | hsa-miR-7106-5p   |
| C17orf85 | hsa-miR-8908-5p   |
| C17orf85 | hsa-miR-6964-3p   |
| C17orf85 | hsa-miR-218a-2-3p |
| C17orf85 | hsa-miR-7199-5p   |
| C17orf85 | hsa-miR-4755-3p   |
| C17orf85 | hsa-miR-199-3p    |
| C17orf85 | hsa-miR-4539      |
| C17orf85 | hsa-miR-548g-5p   |
| C17orf85 | hsa-miR-128-3p    |
| C17orf85 | hsa-miR-134       |
| C17orf85 | hsa-miR-7653-5p   |
| C17orf85 | hsa-miR-548n      |
| C17orf85 | hsa-miR-320-5p    |
| C17orf85 | hsa-miR-3557-5p   |
| C17orf85 | hsa-miR-586       |
| C17orf85 | hsa-miR-3689d     |
| C17orf85 | hsa-miR-6919-3p   |
| C17orf85 | hsa-miR-7243-3p   |
| C17orf85 | hsa-miR-3136-5p   |
| C17orf85 | hsa-miR-7168-3p   |
| C17orf85 | hsa-miR-696       |

|          |                   |
|----------|-------------------|
| C17orf85 | hsa-miR-325-5p    |
| C17orf85 | hsa-miR-4419a     |
| C17orf85 | hsa-miR-6816-3p   |
| C17orf85 | hsa-miR-98-5p     |
| C17orf85 | hsa-miR-6072      |
| C17orf85 | hsa-miR-6900-3p   |
| C17orf85 | hsa-miR-3654      |
| C17orf85 | hsa-miR-23a-5p    |
| C17orf85 | hsa-miR-3183      |
| C17orf85 | hsa-miR-7277-3p   |
| C17orf85 | hsa-miR-548c-3p   |
| C17orf85 | hsa-miR-6779-3p   |
| C17orf85 | hsa-miR-6898-3p   |
| C17orf85 | hsa-miR-3944-5p   |
| C17orf85 | hsa-miR-3185      |
| C17orf85 | hsa-miR-223-3p    |
| C17orf85 | hsa-miR-653-3p    |
| C17orf85 | hsa-miR-3542      |
| C17orf85 | hsa-miR-3609      |
| C17orf85 | hsa-miR-6649-3p   |
| C17orf85 | hsa-miR-516a-3p   |
| C17orf85 | hsa-miR-532-3p    |
| C17orf85 | hsa-miR-141-5p    |
| C17orf85 | hsa-miR-5623-3p   |
| C17orf85 | hsa-miR-103       |
| C17orf85 | hsa-miR-3165      |
| C17orf85 | hsa-miR-1837      |
| C17orf85 | hsa-miR-4650-5p   |
| C17orf85 | hsa-miR-7377-5p   |
| C17orf85 | hsa-miR-2339      |
| C17orf85 | hsa-miR-4494      |
| C17orf85 | hsa-miR-1197      |
| C17orf85 | hsa-miR-4741      |
| C17orf85 | hsa-miR-195-3p    |
| C17orf85 | hsa-miR-7019-3p   |
| C17orf85 | hsa-miR-468-5p    |
| C17orf85 | hsa-miR-674-3p    |
| C17orf85 | hsa-miR-700-5p    |
| C17orf85 | hsa-miR-216-3p    |
| C17orf85 | hsa-miR-8052      |
| C17orf85 | hsa-miR-1283a     |
| C17orf85 | hsa-miR-7851-3p   |
| C17orf85 | hsa-miR-4722-3p   |
| C17orf85 | hsa-miR-181a-2-3p |
| C17orf85 | hsa-miR-5011-5p   |
| C17orf85 | hsa-miR-664a-3p   |

|          |                   |
|----------|-------------------|
| C17orf85 | hsa-miR-26a-3p    |
| C17orf85 | hsa-miR-410-5p    |
| C17orf85 | hsa-miR-142-5p    |
| C17orf85 | hsa-miR-7178-5p   |
| C17orf85 | hsa-miR-3619-5p   |
| C17orf85 | hsa-miR-1956-3p   |
| C17orf85 | hsa-miR-712-5p    |
| C17orf85 | hsa-miR-302-3p    |
| C17orf85 | hsa-miR-1911-3p   |
| C17orf85 | hsa-miR-4679      |
| C17orf85 | hsa-miR-4293      |
| C17orf85 | hsa-miR-7228-3p   |
| C17orf85 | hsa-miR-133-3p.1  |
| C17orf85 | hsa-miR-122       |
| C17orf85 | hsa-miR-2277-3p   |
| C17orf85 | hsa-miR-4802-3p   |
| C17orf85 | hsa-miR-6946-3p   |
| C17orf85 | hsa-miR-32-5p     |
| C17orf85 | hsa-miR-378g      |
| C17orf85 | hsa-miR-628-3p    |
| C17orf85 | hsa-miR-8113      |
| C17orf85 | hsa-miR-6799-5p   |
| C17orf85 | hsa-miR-613       |
| C17orf85 | hsa-miR-3692-3p   |
| C17orf85 | hsa-miR-5000-3p   |
| C17orf85 | hsa-miR-8805      |
| C17orf85 | hsa-miR-7185-3p   |
| C17orf85 | hsa-miR-6128      |
| C17orf85 | hsa-miR-6740-5p   |
| C17orf85 | hsa-miR-218-1-3p  |
| C17orf85 | hsa-miR-874-5p    |
| C17orf85 | hsa-miR-4326      |
| C17orf85 | hsa-miR-107-5p    |
| C17orf85 | hsa-miR-7042-5p   |
| C17orf85 | hsa-miR-758-3p    |
| C17orf85 | hsa-miR-4682      |
| C17orf85 | hsa-miR-101a-3p.2 |
| C17orf85 | hsa-miR-525-5p    |
| C17orf85 | hsa-miR-4792      |
| C17orf85 | hsa-miR-3089-3p   |
| C17orf85 | hsa-miR-8850      |
| C17orf85 | hsa-miR-3069-5p   |
| C17orf85 | hsa-miR-129-5p    |
| C17orf85 | hsa-miR-4793-5p   |
| C17orf85 | hsa-miR-7217-3p   |
| C17orf85 | hsa-miR-6077      |

|          |                   |
|----------|-------------------|
| C17orf85 | hsa-miR-1188-5p   |
| C17orf85 | hsa-miR-151a-5p   |
| C17orf85 | hsa-miR-219a-5p   |
| C17orf85 | hsa-miR-6707-5p   |
| C17orf85 | hsa-miR-2471-5p   |
| C17orf85 | hsa-miR-4474-3p   |
| C17orf85 | hsa-miR-767-3p    |
| C17orf85 | hsa-miR-8082      |
| C17orf85 | hsa-miR-3145-3p   |
| C17orf85 | hsa-miR-1180-3p   |
| C17orf85 | hsa-miR-1815      |
| C17orf85 | hsa-miR-7009-5p   |
| C17orf85 | hsa-miR-206-5p    |
| C17orf85 | hsa-miR-3922-5p   |
| C17orf85 | hsa-miR-485-5p    |
| C17orf85 | hsa-miR-669b-5p   |
| C17orf85 | hsa-miR-6770-5p   |
| C17orf85 | hsa-miR-372-5p    |
| C17orf85 | hsa-miR-592-3p    |
| C17orf85 | hsa-miR-5709-3p   |
| C17orf85 | hsa-miR-455-5p    |
| C17orf85 | hsa-miR-6510-5p   |
| C17orf85 | hsa-miR-3692-5p   |
| C17orf85 | hsa-miR-511-5p    |
| C17orf85 | hsa-miR-4639-3p   |
| C17orf85 | hsa-miR-6865-5p   |
| C17orf85 | hsa-miR-495-3p    |
| C17orf85 | hsa-miR-125b-2-3p |
| C17orf85 | hsa-miR-6759-5p   |
| C17orf85 | hsa-miR-6768-3p   |
| C17orf85 | hsa-miR-4760-3p   |
| C17orf85 | hsa-miR-3096-5p   |
| C17orf85 | hsa-miR-679       |
| C17orf85 | hsa-miR-1207-3p   |
| C17orf85 | hsa-miR-125-5p    |
| C17orf85 | hsa-miR-4687-5p   |
| C17orf85 | hsa-miR-6765-5p   |
| C17orf85 | hsa-miR-6385      |
| C17orf85 | hsa-miR-4656      |
| C17orf85 | hsa-miR-26        |
| C17orf85 | hsa-miR-99-3p     |
| C17orf85 | hsa-miR-6831-3p   |
| C17orf85 | hsa-miR-7071-5p   |
| C17orf85 | hsa-miR-6793-3p   |
| C17orf85 | hsa-miR-3145-5p   |
| C17orf85 | hsa-miR-4283      |

|          |                  |
|----------|------------------|
| C17orf85 | hsa-miR-3965     |
| C17orf85 | hsa-miR-7177-3p  |
| C17orf85 | hsa-miR-6133     |
| C17orf85 | hsa-miR-6825-3p  |
| C17orf85 | hsa-miR-2330-3p  |
| C17orf85 | hsa-miR-1237-3p  |
| C17orf85 | hsa-miR-3913-3p  |
| C17orf85 | hsa-miR-6829-3p  |
| C17orf85 | hsa-miR-575      |
| C17orf85 | hsa-miR-490-3p   |
| C17orf85 | hsa-miR-6554-5p  |
| C17orf85 | hsa-miR-4711-3p  |
| C17orf85 | hsa-miR-494      |
| C17orf85 | hsa-miR-7210-5p  |
| C17orf85 | hsa-miR-6071     |
| C17orf85 | hsa-miR-520f-5p  |
| C17orf85 | hsa-miR-548a-3p  |
| C17orf85 | hsa-miR-2392     |
| C17orf85 | hsa-miR-23b-5p   |
| C17orf85 | hsa-miR-631      |
| C17orf85 | hsa-miR-381-5p   |
| C17orf85 | hsa-miR-8807     |
| C17orf85 | hsa-miR-3913-5p  |
| C17orf85 | hsa-miR-660-5p   |
| C17orf85 | hsa-miR-3148     |
| C17orf85 | hsa-miR-4768-3p  |
| C17orf85 | hsa-miR-559      |
| C17orf85 | hsa-miR-7210-3p  |
| C17orf85 | hsa-miR-31-5p    |
| C17orf85 | hsa-miR-6908-5p  |
| C17orf85 | hsa-miR-7205-3p  |
| C17orf85 | hsa-miR-5003-3p  |
| C17orf85 | hsa-miR-548ay-3p |
| C17orf85 | hsa-miR-471-3p   |
| C17orf85 | hsa-miR-3586-5p  |
| C17orf85 | hsa-miR-6789-3p  |
| C17orf85 | hsa-miR-6990-3p  |
| C17orf85 | hsa-miR-291      |
| C17orf85 | hsa-miR-488-5p   |
| C17orf85 | hsa-miR-548x-3p  |
| C17orf85 | hsa-miR-6843-3p  |
| C17orf85 | hsa-miR-6373     |
| C17orf85 | hsa-miR-6948-5p  |
| C17orf85 | hsa-miR-5131     |
| C17orf85 | hsa-miR-4471     |
| C17orf85 | hsa-miR-410      |

|          |                  |
|----------|------------------|
| C17orf85 | hsa-miR-880-5p   |
| C17orf85 | hsa-miR-6537-3p  |
| C17orf85 | hsa-miR-3151     |
| C17orf85 | hsa-miR-548ap-3p |
| C17orf85 | hsa-miR-465a-5p  |
| C17orf85 | hsa-miR-4744     |
| C17orf85 | hsa-miR-3188     |
| C17orf85 | hsa-miR-6365     |
| C17orf85 | hsa-miR-8888     |
| C17orf85 | hsa-miR-673-5p   |
| C17orf85 | hsa-miR-2284ab   |
| C17orf85 | hsa-miR-881-3p   |
| C17orf85 | hsa-miR-154-5p   |
| C17orf85 | hsa-miR-6791-3p  |
| C17orf85 | hsa-miR-2284k    |
| C17orf85 | hsa-miR-8816     |
| C17orf85 | hsa-miR-7038-5p  |
| C17orf85 | hsa-miR-548ar-3p |
| C17orf85 | hsa-miR-3187-5p  |
| C17orf85 | hsa-miR-7163-3p  |
| C17orf85 | hsa-miR-8886     |
| C17orf85 | hsa-miR-1256     |
| C17orf85 | hsa-miR-216c-5p  |
| C17orf85 | hsa-miR-4456     |
| C17orf85 | hsa-miR-222-5p   |
| C17orf85 | hsa-miR-1904     |
| C17orf85 | hsa-miR-5113     |
| C17orf85 | hsa-miR-766-5p   |
| C17orf85 | hsa-miR-8084     |
| C17orf85 | hsa-miR-601      |
| C17orf85 | hsa-miR-1234-3p  |
| C17orf85 | hsa-miR-1953     |
| C17orf85 | hsa-miR-489-3p   |
| C17orf85 | hsa-miR-3679-3p  |
| C17orf85 | hsa-miR-666-3p   |
| C17orf85 | hsa-miR-2399-3p  |
| C17orf85 | hsa-miR-505-5p   |
| C17orf85 | hsa-miR-122-5p   |
| C17orf85 | hsa-miR-887-5p   |
| C17orf85 | hsa-miR-5698     |
| C17orf85 | hsa-miR-93-5p    |
| C17orf85 | hsa-miR-409b     |
| C17orf85 | hsa-miR-548bd-3p |
| C17orf85 | hsa-miR-6855-3p  |
| C17orf85 | hsa-let-7i-5p    |
| C17orf85 | hsa-miR-6529a    |

|          |                   |
|----------|-------------------|
| C17orf85 | hsa-miR-486-3p    |
| C17orf85 | hsa-miR-29-3p     |
| C17orf85 | hsa-miR-7022-5p   |
| C17orf85 | hsa-miR-871-3p    |
| C17orf85 | hsa-miR-7021-3p   |
| C17orf85 | hsa-miR-410-3p    |
| C17orf85 | hsa-miR-4676-5p   |
| C17orf85 | hsa-miR-26-3p     |
| C17orf85 | hsa-miR-3063-5p   |
| C17orf85 | hsa-miR-344a-3p   |
| C17orf85 | hsa-miR-204-3p    |
| C17orf85 | hsa-miR-6721-5p   |
| C17orf85 | hsa-miR-873a-5p.1 |
| C17orf85 | hsa-miR-373-5p    |
| C17orf85 | hsa-miR-500-5p    |
| C17orf85 | hsa-miR-684       |
| C17orf85 | hsa-miR-205-5p    |
| C17orf85 | hsa-miR-7214-5p   |
| C17orf85 | hsa-miR-5697-3p   |
| C17orf85 | hsa-miR-1205      |
| C17orf85 | hsa-miR-6836-3p   |
| C17orf85 | hsa-miR-2486-3p   |
| C17orf85 | hsa-miR-4501      |
| C17orf85 | hsa-miR-452-3p    |
| C17orf85 | hsa-miR-1967      |
| C17orf85 | hsa-miR-124       |
| C17orf85 | hsa-miR-2285b     |
| C17orf85 | hsa-miR-1569      |
| C17orf85 | hsa-miR-8804      |
| C17orf85 | hsa-miR-7083-3p   |
| C17orf85 | hsa-miR-1301      |
| C17orf85 | hsa-miR-6377      |
| C17orf85 | hsa-miR-5620-3p   |
| C17orf85 | hsa-miR-7177-5p   |
| C17orf85 | hsa-miR-377-3p    |
| C17orf85 | hsa-miR-766-3p    |
| C17orf85 | hsa-miR-669k-5p   |
| C17orf85 | hsa-miR-2353      |
| C17orf85 | hsa-miR-942-5p    |
| C17orf85 | hsa-miR-378a-5p   |
| C17orf85 | hsa-miR-7212-3p   |
| C17orf85 | hsa-miR-3150b-3p  |
| C17orf85 | hsa-miR-2286      |
| C17orf85 | hsa-miR-4435      |
| C17orf85 | hsa-miR-487a-5p   |
| C17orf85 | hsa-miR-466       |

|          |                   |
|----------|-------------------|
| C17orf85 | hsa-miR-7269-3p   |
| C17orf85 | hsa-miR-543-3p    |
| C17orf85 | hsa-miR-1185-5p   |
| C17orf85 | hsa-miR-3127-5p   |
| C17orf85 | hsa-miR-5004-3p   |
| C17orf85 | hsa-miR-4769-3p   |
| C17orf85 | hsa-miR-3975      |
| C17orf85 | hsa-miR-3120-3p   |
| C17orf85 | hsa-miR-344c-3p   |
| C17orf85 | hsa-miR-2458      |
| C17orf85 | hsa-miR-298       |
| C17orf85 | hsa-miR-6736-5p   |
| C17orf85 | hsa-miR-876       |
| C17orf85 | hsa-miR-146b-3p   |
| C17orf85 | hsa-miR-7a-2-3p   |
| C17orf85 | hsa-miR-3064-5p   |
| C17orf85 | hsa-miR-7660-5p   |
| C17orf85 | hsa-miR-499b-5p   |
| C17orf85 | hsa-miR-7060-3p   |
| C17orf85 | hsa-miR-34b-3p    |
| C17orf85 | hsa-miR-216a-5p   |
| C17orf85 | hsa-miR-137-3p    |
| C17orf85 | hsa-miR-1183      |
| C17orf85 | hsa-miR-504-3p    |
| C17orf85 | hsa-miR-2861      |
| C17orf85 | hsa-miR-3470a     |
| C17orf85 | hsa-miR-3141      |
| C17orf85 | hsa-miR-337-3p    |
| C17orf85 | hsa-miR-4308      |
| C17orf85 | hsa-miR-23a-3p    |
| C17orf85 | hsa-miR-873a-3p   |
| C17orf85 | hsa-miR-155-5p    |
| C17orf85 | hsa-miR-1538      |
| C17orf85 | hsa-miR-2439-5p   |
| C17orf85 | hsa-miR-1193-3p   |
| C17orf85 | hsa-miR-449-5p    |
| C17orf85 | hsa-miR-943       |
| C17orf85 | hsa-miR-18-3p     |
| C17orf85 | hsa-miR-7110-3p   |
| C17orf85 | hsa-miR-668-3p    |
| C17orf85 | hsa-miR-544-5p    |
| C17orf85 | hsa-miR-7094-1-5p |
| C17orf85 | hsa-miR-4266      |
| C17orf85 | hsa-miR-30a-3p    |
| C17orf85 | hsa-miR-6827-3p   |
| C17orf85 | hsa-miR-642       |



|          |                  |
|----------|------------------|
| C17orf85 | hsa-miR-4752     |
| C17orf85 | hsa-miR-582-5p   |
| C17orf85 | hsa-miR-3689e    |
| C17orf85 | hsa-miR-290b-5p  |
| C17orf85 | hsa-miR-570-3p   |
| C17orf85 | hsa-miR-18b-3p   |
| C17orf85 | hsa-miR-7081-3p  |
| C17orf85 | hsa-miR-6728-3p  |
| C17orf85 | hsa-miR-449a     |
| C17orf85 | hsa-miR-2450c    |
| C17orf85 | hsa-miR-6877-5p  |
| C17orf85 | hsa-miR-6797-3p  |
| C17orf85 | hsa-miR-376c-5p  |
| C17orf85 | hsa-miR-196-2-3p |
| C17orf85 | hsa-miR-1296-5p  |
| C17orf85 | hsa-miR-6781-3p  |
| C17orf85 | hsa-miR-1786     |
| C17orf85 | hsa-miR-3944-3p  |
| C17orf85 | hsa-miR-2681-3p  |
| C17orf85 | hsa-miR-3938-3p  |
| C17orf85 | hsa-miR-574-5p   |
| C17orf85 | hsa-miR-1343-5p  |
| C17orf85 | hsa-miR-3174     |
| C17orf85 | hsa-miR-4797-3p  |
| C17orf85 | hsa-miR-1934-3p  |
| C17orf85 | hsa-miR-767      |
| C17orf85 | hsa-miR-6899-5p  |
| C17orf85 | hsa-miR-130-3p   |
| C17orf85 | hsa-miR-5003-5p  |
| C17orf85 | hsa-miR-4660     |
| C17orf85 | hsa-miR-6511-5p  |
| C17orf85 | hsa-miR-6794-3p  |
| C17orf85 | hsa-miR-3102     |
| C17orf85 | hsa-miR-4511     |
| C17orf85 | hsa-miR-7386i-5p |
| C17orf85 | hsa-miR-3065-5p  |
| C17orf85 | hsa-miR-423-3p   |
| C17orf85 | hsa-miR-5690     |
| C17orf85 | hsa-miR-34-5p    |
| C17orf85 | hsa-miR-2306     |
| C17orf85 | hsa-miR-3616-3p  |
| C17orf85 | hsa-miR-7094-3p  |
| C17orf85 | hsa-miR-6987-5p  |
| C17orf85 | hsa-miR-7227-5p  |
| C17orf85 | hsa-miR-2284     |
| C17orf85 | hsa-miR-3074-5p  |

|          |                      |
|----------|----------------------|
| C17orf85 | hsa-miR-6826-3p      |
| C17orf85 | hsa-miR-216c-3p      |
| C17orf85 | hsa-miR-539-3p       |
| C17orf85 | hsa-miR-619-3p       |
| C17orf85 | hsa-miR-6914-3p      |
| C17orf85 | hsa-miR-9-5p         |
| C17orf85 | hsa-miR-3659         |
| C17orf85 | hsa-miR-1255         |
| C17orf85 | hsa-miR-1738         |
| C17orf85 | hsa-miR-452-5p       |
| C17orf85 | hsa-miR-346          |
| C17orf85 | hsa-miR-2407         |
| C17orf85 | hsa-miR-92b-5p       |
| C17orf85 | hsa-miR-4777-5p      |
| C17orf85 | hsa-miR-1912-3p      |
| C17orf85 | hsa-miR-200a-5p      |
| C17orf85 | hsa-miR-548am-5p     |
| C17orf85 | hsa-miR-196a-3p      |
| C17orf85 | hsa-miR-195-5p       |
| C17orf85 | hsa-miR-344-5p       |
| C17orf85 | hsa-miR-363-3p       |
| C17orf85 | hsa-miR-496b         |
| C17orf85 | hsa-miR-374          |
| C17orf85 | hsa-miR-5619-5p      |
| C17orf85 | hsa-miR-302bd        |
| C17orf85 | hsa-miR-8908c        |
| C17orf85 | hsa-miR-6735-3p      |
| C17orf85 | hsa-miR-7463-3p      |
| C17orf85 | hsa-miR-222-3p       |
| C17orf85 | hsa-miR-3061-3p      |
| C17orf85 | hsa-miR-6507-5p      |
| C17orf85 | hsa-miR-20b-3p       |
| C17orf85 | hsa-miR-519d-5p      |
| C17orf85 | hsa-miR-96-5p        |
| C17orf85 | hsa-miR-8887         |
| C17orf85 | hsa-miR-548k         |
| C17orf85 | hsa-miR-6891-3p      |
| C17orf85 | hsa-miR-576-5p       |
| C17orf85 | hsa-miR-7212-5p      |
| C17orf85 | hsa-miR-3102-3p.2-3p |
| C17orf85 | hsa-miR-454          |
| C17orf85 | hsa-miR-548e-3p      |
| C17orf85 | hsa-miR-96-5p        |
| C17orf85 | hsa-miR-494-5p       |
| C17orf85 | hsa-miR-1190         |
| C17orf85 | hsa-miR-1262         |

|          |                  |
|----------|------------------|
| C17orf85 | hsa-miR-6861-5p  |
| C17orf85 | hsa-miR-106b-5p  |
| C17orf85 | hsa-miR-516      |
| C17orf85 | hsa-miR-548c-3p  |
| C17orf85 | hsa-miR-2376     |
| C17orf85 | hsa-miR-1943-5p  |
| C17orf85 | hsa-miR-6780a-5p |
| C17orf85 | hsa-miR-8077     |
| C17orf85 | hsa-miR-370-5p   |
| C17orf85 | hsa-miR-6769b-3p |
| C17orf85 | hsa-miR-3473f    |
| C17orf85 | hsa-miR-489-5p   |
| C17orf85 | hsa-miR-7154-5p  |
| C17orf85 | hsa-miR-6916-5p  |
| C17orf85 | hsa-miR-512      |
| C17orf85 | hsa-miR-4651     |
| C17orf85 | hsa-miR-7093-3p  |
| C17orf85 | hsa-miR-8860     |
| C17orf85 | hsa-miR-5627-5p  |
| C17orf85 | hsa-miR-31-5p    |
| C17orf85 | hsa-miR-3059-3p  |
| C17orf85 | hsa-miR-6330     |
| C17orf85 | hsa-miR-2290     |
| C17orf85 | hsa-miR-518-3p   |
| C17orf85 | hsa-miR-493-3p   |
| C17orf85 | hsa-miR-6984-5p  |
| C17orf85 | hsa-miR-8854     |
| C17orf85 | hsa-miR-6867-5p  |
| C17orf85 | hsa-miR-4719     |
| C17orf85 | hsa-miR-140-3p   |
| C17orf85 | hsa-miR-154b     |
| C17orf85 | hsa-miR-639      |
| C17orf85 | hsa-miR-7659-5p  |
| C17orf85 | hsa-miR-6715b-5p |
| C17orf85 | hsa-miR-4298     |
| C17orf85 | hsa-miR-3938     |
| C17orf85 | hsa-miR-183-5p   |
| C17orf85 | hsa-miR-2340     |
| C17orf85 | hsa-miR-6792-3p  |
| C17orf85 | hsa-miR-644a     |
| C17orf85 | hsa-miR-7193-5p  |
| C17orf85 | hsa-miR-187-5p   |
| C17orf85 | hsa-miR-376ab-3p |
| C17orf85 | hsa-miR-133-3p   |
| C17orf85 | hsa-miR-328-5p   |
| C17orf85 | hsa-miR-296-5p   |

|          |                   |
|----------|-------------------|
| C17orf85 | hsa-miR-1180-5p   |
| C17orf85 | hsa-miR-664a-5p   |
| C17orf85 | hsa-miR-7031-5p   |
| C17orf85 | hsa-miR-3473be    |
| C17orf85 | hsa-miR-6129      |
| C17orf85 | hsa-miR-4794      |
| C17orf85 | hsa-let-7-5p      |
| C17orf85 | hsa-miR-516b      |
| C17orf85 | hsa-miR-4490      |
| C17orf85 | hsa-miR-2314      |
| C17orf85 | hsa-miR-922       |
| C17orf85 | hsa-miR-548ad-5p  |
| C17orf85 | hsa-miR-1626-5p   |
| C17orf85 | hsa-miR-149-3p    |
| C17orf85 | hsa-miR-3927-3p   |
| C17orf85 | hsa-miR-2284n     |
| C17orf85 | hsa-miR-659-5p    |
| C17orf85 | hsa-miR-7048-5p   |
| C17orf85 | hsa-miR-30-3p     |
| C17orf85 | hsa-miR-2284x     |
| C17orf85 | hsa-miR-455-3p.1  |
| C17orf85 | hsa-miR-181b-1-3p |
| C17orf85 | hsa-miR-5114      |
| C17orf85 | hsa-miR-1-3p      |
| C17orf85 | hsa-miR-9769-3p   |
| C17orf85 | hsa-miR-124c-5p   |
| C17orf85 | hsa-miR-505-3p.2  |
| C17orf85 | hsa-miR-7864      |
| C17orf85 | hsa-miR-4786-5p   |
| C17orf85 | hsa-miR-34b-3p    |
| C17orf85 | hsa-miR-7703      |
| C17orf85 | hsa-miR-589-3p    |
| C17orf85 | hsa-miR-339-5p    |
| C17orf85 | hsa-miR-7321-3p   |
| C17orf85 | hsa-miR-7199-3p   |
| C17orf85 | hsa-miR-607       |
| C17orf85 | hsa-miR-200-3p    |
| C17orf85 | hsa-miR-3689a-5p  |
| C17orf85 | hsa-miR-4773      |
| C17orf85 | hsa-miR-7688-3p   |
| C17orf85 | hsa-miR-4643      |
| C17orf85 | hsa-miR-466b-3p   |
| C17orf85 | hsa-miR-1253      |
| C17orf85 | hsa-miR-16-5p     |
| C17orf85 | hsa-miR-342-5p    |
| C17orf85 | hsa-miR-665-3p    |

|          |                  |
|----------|------------------|
| C17orf85 | hsa-miR-516b-3p  |
| C17orf85 | hsa-miR-6346     |
| C17orf85 | hsa-miR-921      |
| C17orf85 | hsa-miR-378c     |
| C17orf85 | hsa-miR-3089-5p  |
| C17orf85 | hsa-miR-4680-3p  |
| C17orf85 | hsa-miR-669j     |
| C17orf85 | hsa-miR-759      |
| C17orf85 | hsa-miR-206      |
| C17orf85 | hsa-miR-3058-3p  |
| C17orf85 | hsa-miR-4532     |
| C17orf85 | hsa-miR-548c-5p  |
| C17orf85 | hsa-miR-3919     |
| C17orf85 | hsa-miR-1240     |
| C17orf85 | hsa-miR-224-5p   |
| C17orf85 | hsa-miR-7026-5p  |
| C17orf85 | hsa-let-7b-3p    |
| C17orf85 | hsa-miR-3962     |
| C17orf85 | hsa-miR-6740-3p  |
| C17orf85 | hsa-miR-107      |
| C17orf85 | hsa-miR-7038-3p  |
| C17orf85 | hsa-miR-7054-5p  |
| C17orf85 | hsa-miR-466g     |
| C17orf85 | hsa-miR-1701     |
| C17orf85 | hsa-miR-3191-5p  |
| C17orf85 | hsa-miR-20-3p    |
| C17orf85 | hsa-miR-2284-5p  |
| C17orf85 | hsa-miR-196-5p   |
| C17orf85 | hsa-miR-5701     |
| C17orf85 | hsa-miR-433      |
| C17orf85 | hsa-miR-190a-3p  |
| C17orf85 | hsa-miR-203-5p   |
| C17orf85 | hsa-miR-934-5p   |
| C17orf85 | hsa-miR-302c-3p  |
| C17orf85 | hsa-miR-3125     |
| C17orf85 | hsa-miR-3684     |
| C17orf85 | hsa-miR-3929     |
| C17orf85 | hsa-miR-4659b-3p |
| C17orf85 | hsa-miR-606      |
| C17orf85 | hsa-miR-1266     |
| C17orf85 | hsa-miR-138-5p   |
| C17orf85 | hsa-miR-6994-3p  |
| C17orf85 | hsa-miR-302b-5p  |
| C17orf85 | hsa-miR-4739     |
| C17orf85 | hsa-miR-2430     |
| C17orf85 | hsa-miR-2285u    |

|          |                  |
|----------|------------------|
| C17orf85 | hsa-miR-4330     |
| C17orf85 | hsa-miR-380      |
| C17orf85 | hsa-miR-365-5p   |
| C17orf85 | hsa-miR-2431-5p  |
| C17orf85 | hsa-miR-687      |
| C17orf85 | hsa-miR-423-5p   |
| C17orf85 | hsa-miR-98-3p    |
| C17orf85 | hsa-miR-2188-3p  |
| C17orf85 | hsa-miR-6355     |
| C17orf85 | hsa-miR-8864     |
| C17orf85 | hsa-miR-2294     |
| C17orf85 | hsa-miR-6612-5p  |
| C17orf85 | hsa-miR-302c-5p  |
| C17orf85 | hsa-miR-8813     |
| C17orf85 | hsa-miR-1191b-5p |
| C17orf85 | hsa-miR-7069-3p  |
| C17orf85 | hsa-miR-8054     |
| C17orf85 | hsa-miR-302f     |
| C17orf85 | hsa-miR-2411-3p  |
| C17orf85 | hsa-miR-6081     |
| C17orf85 | hsa-miR-491-3p   |
| C17orf85 | hsa-miR-6734-3p  |
| C17orf85 | hsa-miR-5703     |
| C17orf85 | hsa-miR-1909-5p  |
| C17orf85 | hsa-miR-520      |
| C17orf85 | hsa-miR-4704-3p  |
| C17orf85 | hsa-miR-1254     |
| C17orf85 | hsa-miR-648      |
| C17orf85 | hsa-miR-92a-2-5p |
| C17orf85 | hsa-miR-5108     |
| C17orf85 | hsa-miR-5627-3p  |
| C17orf85 | hsa-miR-8116     |
| C17orf85 | hsa-miR-532-5p   |
| C17orf85 | hsa-miR-6901-3p  |
| C17orf85 | hsa-miR-4673     |
| C17orf85 | hsa-miR-3058-5p  |
| C17orf85 | hsa-miR-1231     |
| C17orf85 | hsa-miR-2475     |
| C17orf85 | hsa-miR-1596-5p  |
| C17orf85 | hsa-miR-1276     |
| C17orf85 | hsa-miR-514b-5p  |
| C17orf85 | hsa-miR-371b-5p  |
| C17orf85 | hsa-miR-2443     |
| C17orf85 | hsa-miR-7686-5p  |
| C17orf85 | hsa-miR-129-5p   |
| C17orf85 | hsa-miR-1224-5p  |

|          |                   |
|----------|-------------------|
| C17orf85 | hsa-miR-5120      |
| C17orf85 | hsa-miR-2897      |
| C17orf85 | hsa-miR-4438      |
| C17orf85 | hsa-miR-204-5p    |
| C17orf85 | hsa-miR-3607-5p   |
| C17orf85 | hsa-miR-670       |
| C17orf85 | hsa-miR-509-5p    |
| C17orf85 | hsa-miR-624-3p    |
| C17orf85 | hsa-miR-4449      |
| C17orf85 | hsa-miR-6982-3p   |
| C17orf85 | hsa-miR-1298-3p   |
| C17orf85 | hsa-miR-2438      |
| C17orf85 | hsa-miR-3664-3p   |
| C17orf85 | hsa-miR-7663-5p   |
| C17orf85 | hsa-miR-7321-5p   |
| C17orf85 | hsa-miR-6845-5p   |
| C17orf85 | hsa-miR-548ae-3p  |
| C17orf85 | hsa-miR-2466-3p   |
| C17orf85 | hsa-miR-432-3p    |
| C17orf85 | hsa-miR-30c-2-3p  |
| C17orf85 | hsa-miR-1262-3p   |
| C17orf85 | hsa-miR-34        |
| C17orf85 | hsa-miR-8823      |
| C17orf85 | hsa-miR-4667-5p   |
| C17orf85 | hsa-miR-468-3p    |
| C17orf85 | hsa-miR-3928-5p   |
| C17orf85 | hsa-miR-4282      |
| C17orf85 | hsa-miR-3122      |
| C17orf85 | hsa-let-7a-5p     |
| C17orf85 | hsa-miR-3622a-3p  |
| C17orf85 | hsa-miR-605       |
| C17orf85 | hsa-miR-146-5p    |
| C17orf85 | hsa-miR-8485      |
| C17orf85 | hsa-miR-1892      |
| C17orf85 | hsa-miR-7007-5p   |
| C17orf85 | hsa-miR-214-3p    |
| C17orf85 | hsa-miR-344d-2-5p |
| C17orf85 | hsa-miR-7024-3p   |
| C17orf85 | hsa-miR-101b-3p.1 |
| C17orf85 | hsa-miR-6796-5p   |
| C17orf85 | hsa-miR-6844      |
| C17orf85 | hsa-miR-653       |
| C17orf85 | hsa-miR-411-5p    |
| C17orf85 | hsa-miR-3099-5p   |
| C17orf85 | hsa-miR-370       |
| C17orf85 | hsa-miR-7665-3p   |

|          |                  |
|----------|------------------|
| C17orf85 | hsa-miR-4745-3p  |
| C17orf85 | hsa-miR-4477a    |
| C17orf85 | hsa-miR-1229-3p  |
| C17orf85 | hsa-miR-6739-3p  |
| C17orf85 | hsa-miR-8908b    |
| C17orf85 | hsa-miR-216b     |
| C17orf85 | hsa-miR-7681-3p  |
| C17orf85 | hsa-miR-7678-5p  |
| C17orf85 | hsa-miR-7646-5p  |
| C17orf85 | hsa-miR-4419b    |
| C17orf85 | hsa-miR-942-3p   |
| C17orf85 | hsa-miR-1896     |
| C17orf85 | hsa-miR-5591-3p  |
| C17orf85 | hsa-miR-548ak    |
| C17orf85 | hsa-miR-1207-5p  |
| C17orf85 | hsa-miR-3551-3p  |
| C17orf85 | hsa-miR-381-3p   |
| C17orf85 | hsa-miR-7666-5p  |
| C17orf85 | hsa-miR-3073a-5p |
| C17orf85 | hsa-miR-4753-5p  |
| C17orf85 | hsa-miR-6781-5p  |
| C17orf85 | hsa-miR-1193     |
| C17orf85 | hsa-miR-3690     |
| C17orf85 | hsa-miR-6849-3p  |
| C17orf85 | hsa-miR-383      |
| C17orf85 | hsa-miR-8873a    |
| C17orf85 | hsa-miR-6880-5p  |
| C17orf85 | hsa-miR-19a-5p   |
| C17orf85 | hsa-miR-3571     |
| C17orf85 | hsa-miR-548ar-5p |
| C17orf85 | hsa-miR-299-5p   |
| C17orf85 | hsa-miR-1202     |
| C17orf85 | hsa-miR-6134     |
| C17orf85 | hsa-miR-7169-5p  |
| C17orf85 | hsa-miR-3600     |
| C17orf85 | hsa-miR-5583-3p  |
| C17orf85 | hsa-miR-3079-3p  |
| C17orf85 | hsa-miR-320a     |
| C17orf85 | hsa-miR-4692     |
| C17orf85 | hsa-miR-3103-5p  |
| C17orf85 | hsa-miR-3140-5p  |
| C17orf85 | hsa-miR-504-5p   |
| C17orf85 | hsa-miR-4529-3p  |
| C17orf85 | hsa-miR-4793-3p  |
| C17orf85 | hsa-miR-7467-3p  |
| C17orf85 | hsa-miR-6568-3p  |



|          |                 |
|----------|-----------------|
| C17orf85 | hsa-miR-125-3p  |
| C17orf85 | hsa-miR-4714-5p |
| C17orf85 | hsa-miR-1247-3p |
| C17orf85 | hsa-miR-1777    |
| C17orf85 | hsa-miR-1250-5p |
| C17orf85 | hsa-miR-7006-3p |
| C17orf85 | hsa-miR-7975    |
| C17orf85 | hsa-miR-4664-5p |
| C17orf85 | hsa-miR-211-5p  |
| C17orf85 | hsa-miR-7227-3p |
| C17orf85 | hsa-miR-466l-3p |
| C17orf85 | hsa-miR-1264    |
| C17orf85 | hsa-miR-891a-3p |
| C17orf85 | hsa-let-7afk-3p |
| C17orf85 | hsa-miR-143-3p  |
| C17orf85 | hsa-miR-7025-3p |
| C17orf85 | hsa-miR-1941-5p |
| C17orf85 | hsa-let-7c-5p   |
| C17orf85 | hsa-miR-6760-5p |
| C17orf85 | hsa-miR-6735-5p |
| C17orf85 | hsa-miR-1537-3p |
| C17orf85 | hsa-miR-5096    |
| C17orf85 | hsa-miR-103-5p  |
| C17orf85 | hsa-miR-7012-5p |
| C17orf85 | hsa-miR-185-5p  |
| C17orf85 | hsa-miR-24-5p   |
| C17orf85 | hsa-miR-1785    |
| C17orf85 | hsa-miR-4756-3p |
| C17orf85 | hsa-miR-3619-3p |
| C17orf85 | hsa-miR-6992-5p |
| C17orf85 | hsa-let-7-3p    |
| C17orf85 | hsa-miR-677-5p  |
| C17orf85 | hsa-miR-520-5p  |
| C17orf85 | hsa-miR-7017-5p |
| C17orf85 | hsa-miR-8071    |
| C17orf85 | hsa-miR-1251-5p |
| C17orf85 | hsa-miR-595     |
| C17orf85 | hsa-miR-6879-5p |
| C17orf85 | hsa-miR-6131    |
| C17orf85 | hsa-miR-544a    |
| C17orf85 | hsa-miR-7205-5p |
| C17orf85 | hsa-miR-1285-3p |
| C17orf85 | hsa-miR-3660    |
| C17orf85 | hsa-miR-591     |
| C17orf85 | hsa-miR-524-3p  |
| C17orf85 | hsa-miR-3193    |

|          |                 |
|----------|-----------------|
| C17orf85 | hsa-miR-378-5p  |
| C17orf85 | hsa-miR-5002-3p |
| C17orf85 | hsa-miR-197-5p  |
| C17orf85 | hsa-miR-4534    |
| C17orf85 | hsa-miR-182-5p  |
| C17orf85 | hsa-miR-2896    |
| C17orf85 | hsa-miR-5008-3p |
| C17orf85 | hsa-miR-7035-5p |
| C17orf85 | hsa-miR-6130    |
| C17orf85 | hsa-miR-624-5p  |
| C17orf85 | hsa-miR-550a-3p |
| C17orf85 | hsa-miR-3957    |
| C17orf85 | hsa-miR-422     |
| C17orf85 | hsa-miR-7064-5p |
| C17orf85 | hsa-miR-744-5p  |
| C17orf85 | hsa-miR-2285k   |
| C17orf85 | hsa-miR-4447    |
| C17orf85 | hsa-miR-669i    |
| C17orf85 | hsa-miR-8898    |
| C17orf85 | hsa-miR-7857    |
| C17orf85 | hsa-miR-2284u   |
| C17orf85 | hsa-miR-7087-3p |
| C17orf85 | hsa-miR-5132-5p |
| C17orf85 | hsa-miR-599-5p  |
| C17orf85 | hsa-miR-4680-5p |
| C17orf85 | hsa-miR-551-5p  |
| C17orf85 | hsa-miR-16-5p   |
| C17orf85 | hsa-miR-938     |
| C17orf85 | hsa-miR-6779-5p |
| C17orf85 | hsa-miR-6399    |
| C17orf85 | hsa-miR-5589-3p |
| C17orf85 | hsa-miR-3085-3p |
| C17orf85 | hsa-miR-2446    |
| C17orf85 | hsa-miR-5090    |
| C17orf85 | hsa-miR-3649    |
| C17orf85 | hsa-miR-4746-5p |
| C17orf85 | hsa-miR-2052    |
| C17orf85 | hsa-miR-644a    |
| C17orf85 | hsa-miR-564     |
| C17orf85 | hsa-miR-1941-3p |
| C17orf85 | hsa-miR-8803    |
| C17orf85 | hsa-miR-4462    |
| C17orf85 | hsa-miR-542-3p  |
| C17orf85 | hsa-miR-26b-3p  |
| C17orf85 | hsa-miR-624-3p  |
| C17orf85 | hsa-miR-8819    |

|          |                  |
|----------|------------------|
| C17orf85 | hsa-miR-6729-3p  |
| C17orf85 | hsa-miR-1539     |
| C17orf85 | hsa-miR-1266-5p  |
| C17orf85 | hsa-miR-1812-5p  |
| C17orf85 | hsa-miR-548au-5p |
| C17orf85 | hsa-miR-741-3p   |
| C17orf85 | hsa-miR-7019-5p  |
| C17orf85 | hsa-miR-1687-3p  |
| C17orf85 | hsa-miR-3667-5p  |
| C17orf85 | hsa-miR-3611     |
| C17orf85 | hsa-miR-2379     |
| C17orf85 | hsa-miR-6916-3p  |
| C17orf85 | hsa-miR-200c-5p  |
| C17orf85 | hsa-miR-8055     |
| C17orf85 | hsa-miR-548ac    |
| C17orf85 | hsa-miR-6124     |
| C17orf85 | hsa-miR-6754-3p  |
| C17orf85 | hsa-miR-8893     |
| C17orf85 | hsa-miR-211-5p   |
| C17orf85 | hsa-miR-6881-3p  |
| C17orf85 | hsa-miR-578      |
| C17orf85 | hsa-miR-548aj-5p |
| C17orf85 | hsa-miR-514a-5p  |
| C17orf85 | hsa-miR-215-3p   |
| C17orf85 | hsa-miR-2985     |
| C17orf85 | hsa-miR-27b-5p   |
| C17orf85 | hsa-miR-3652     |
| C17orf85 | hsa-miR-3431     |
| C17orf85 | hsa-miR-7162-3p  |
| C17orf85 | hsa-miR-6965-3p  |
| C17orf85 | hsa-miR-608      |
| C17orf85 | hsa-miR-134-5p   |
| C17orf85 | hsa-miR-3572     |
| C17orf85 | hsa-miR-6815-5p  |
| C17orf85 | hsa-miR-2114-3p  |
| C17orf85 | hsa-miR-2448-3p  |
| C17orf85 | hsa-miR-4252     |
| C17orf85 | hsa-miR-500-3p   |
| C17orf85 | hsa-miR-4509     |
| C17orf85 | hsa-miR-6878-5p  |
| C17orf85 | hsa-miR-2422     |
| C17orf85 | hsa-miR-6321     |
| C17orf85 | hsa-miR-6335     |
| C17orf85 | hsa-miR-3605-5p  |
| C17orf85 | hsa-miR-5101     |
| C17orf85 | hsa-miR-1273g-5p |

|          |                 |
|----------|-----------------|
| C17orf85 | hsa-miR-6710-3p |
| C17orf85 | hsa-miR-6949-5p |
| C17orf85 | hsa-miR-548i    |
| C17orf85 | hsa-miR-7116-5p |
| C17orf85 | hsa-miR-216a-3p |
| C17orf85 | hsa-miR-7702    |
| C17orf85 | hsa-miR-4328    |
| C17orf85 | hsa-miR-7862    |
| C17orf85 | hsa-miR-3607-3p |
| C17orf85 | hsa-miR-23b-3p  |
| C17orf85 | hsa-miR-451b    |
| C17orf85 | hsa-miR-7016-3p |
| C17orf85 | hsa-miR-219b-5p |
| C17orf85 | hsa-miR-7354-3p |
| C17orf85 | hsa-miR-5582-5p |
| C17orf85 | hsa-miR-32-5p   |
| C17orf85 | hsa-miR-30--3p  |
| C17orf85 | hsa-miR-3474    |
| C17orf85 | hsa-miR-2331-3p |
| C17orf85 | hsa-miR-6541    |
| C17orf85 | hsa-miR-212-5p  |
| C17orf85 | hsa-miR-6120-5p |
| C17orf85 | hsa-miR-6332    |
| C17orf85 | hsa-miR-497-3p  |
| C17orf85 | hsa-miR-3130-3p |
| C17orf85 | hsa-miR-205-5p  |
| C17orf85 | hsa-miR-3617-5p |
| C17orf85 | hsa-miR-4681    |
| C17orf85 | hsa-miR-2285r   |
| C17orf85 | hsa-miR-6745    |
| C17orf85 | hsa-miR-2401    |
| C17orf85 | hsa-miR-132-3p  |
| C17orf85 | hsa-miR-548ax   |
| C17orf85 | hsa-miR-679-3p  |
| C17orf85 | hsa-miR-1746    |
| C17orf85 | hsa-miR-6737-3p |
| C17orf85 | hsa-miR-4269    |
| C17orf85 | hsa-miR-6940-3p |
| C17orf85 | hsa-miR-1249-5p |
| C17orf85 | hsa-miR-3556b   |
| C17orf85 | hsa-miR-7268-3p |
| C17orf85 | hsa-miR-196c-3p |
| C17orf85 | hsa-miR-7083-5p |
| C17orf85 | hsa-miR-3099-3p |
| C17orf85 | hsa-miR-877-5p  |
| C17orf85 | hsa-miR-2388-3p |

|          |                  |
|----------|------------------|
| C17orf85 | hsa-miR-3614-5p  |
| C17orf85 | hsa-miR-6750-5p  |
| C17orf85 | hsa-miR-548      |
| C17orf85 | hsa-miR-6418-5p  |
| C17orf85 | hsa-miR-3087-5p  |
| C17orf85 | hsa-miR-6803-3p  |
| C17orf85 | hsa-miR-8899     |
| C17orf85 | hsa-miR-6677-5p  |
| C17orf85 | hsa-miR-628-5p   |
| C17orf85 | hsa-miR-7184-5p  |
| C17orf85 | hsa-miR-488-3p   |
| C17orf85 | hsa-miR-5125     |
| C17orf85 | hsa-miR-185-5p   |
| C17orf85 | hsa-miR-5580-5p  |
| C17orf85 | hsa-miR-6515-5p  |
| C17orf85 | hsa-miR-8061     |
| C17orf85 | hsa-miR-6943-3p  |
| C17orf85 | hsa-miR-301-5p   |
| C17orf85 | hsa-miR-193-3p   |
| C17orf85 | hsa-miR-29-5p    |
| C17orf85 | hsa-miR-6086     |
| C17orf85 | hsa-miR-6942-5p  |
| C17orf85 | hsa-miR-6734-5p  |
| C17orf85 | hsa-miR-6857-3p  |
| C17orf85 | hsa-miR-181-5p   |
| C17orf85 | hsa-miR-544-3p   |
| C17orf85 | hsa-miR-1827     |
| C17orf85 | hsa-miR-8793     |
| C17orf85 | hsa-miR-1465     |
| C17orf85 | hsa-miR-7687-5p  |
| C17orf85 | hsa-miR-512-3p   |
| C17orf85 | hsa-miR-2311     |
| C17orf85 | hsa-miR-4999-5p  |
| C17orf85 | hsa-miR-4716-3p  |
| C17orf85 | hsa-miR-6896-5p  |
| C17orf85 | hsa-miR-1584-5p  |
| C17orf85 | hsa-miR-378d     |
| C17orf85 | hsa-miR-2284a    |
| C17orf85 | hsa-miR-548aj-3p |
| C17orf85 | hsa-miR-2410     |
| C17orf85 | hsa-miR-487b-5p  |
| C17orf85 | hsa-miR-491-5p   |
| C17orf85 | hsa-miR-338-3p   |
| C17orf85 | hsa-miR-1236-3p  |
| C17orf85 | hsa-miR-3194-5p  |
| C17orf85 | hsa-miR-6569-5p  |

|          |                   |
|----------|-------------------|
| C17orf85 | hsa-miR-6962-3p   |
| C17orf85 | hsa-miR-6914-5p   |
| C17orf85 | hsa-miR-6529b     |
| C17orf85 | hsa-miR-217       |
| C17orf85 | hsa-miR-522-3p    |
| C17orf85 | hsa-miR-6973b-3p  |
| C17orf85 | hsa-let-7b-5p     |
| C17orf85 | hsa-miR-6401      |
| C17orf85 | hsa-miR-6819-5p   |
| C17orf85 | hsa-miR-1271-5p   |
| C17orf85 | hsa-miR-7240-5p   |
| C17orf85 | hsa-miR-1560-3p   |
| C17orf85 | hsa-miR-598-5p    |
| C17orf85 | hsa-miR-6902-3p   |
| C17orf85 | hsa-miR-489       |
| C17orf85 | hsa-miR-5615-5p   |
| C17orf85 | hsa-miR-6870-3p   |
| C17orf85 | hsa-miR-4658      |
| C17orf85 | hsa-miR-219a-1-3p |
| C17orf85 | hsa-miR-212-3p    |
| C17orf85 | hsa-miR-101-3p.2  |
| C17orf85 | hsa-miR-3202      |
| C17orf85 | hsa-miR-199b-5p   |
| C17orf85 | hsa-miR-200a-3p   |
| C17orf85 | hsa-miR-7-5p      |
| C17orf85 | hsa-miR-4699-3p   |
| C17orf85 | hsa-miR-6741-5p   |
| C17orf85 | hsa-miR-196-1-3p  |
| C17orf85 | hsa-miR-330-3p.2  |
| C17orf85 | hsa-miR-2393      |
| C17orf85 | hsa-miR-8062      |
| C17orf85 | hsa-miR-3620-3p   |
| C17orf85 | hsa-miR-188-3p    |
| C17orf85 | hsa-miR-1248      |
| C17orf85 | hsa-miR-199-5p    |
| C17orf85 | hsa-miR-678       |
| C17orf85 | hsa-miR-2276-3p   |
| C17orf85 | hsa-miR-2381      |
| C17orf85 | hsa-miR-3918      |
| C17orf85 | hsa-miR-9768-3p   |
| C17orf85 | hsa-miR-30        |
| C17orf85 | hsa-miR-518d-5p   |
| C17orf85 | hsa-miR-7036a-3p  |
| C17orf85 | hsa-miR-4277      |
| C17orf85 | hsa-miR-6885-5p   |
| C17orf85 | hsa-miR-1906      |

|          |                    |
|----------|--------------------|
| C17orf85 | hsa-miR-6780b-5p   |
| C17orf85 | hsa-miR-7029-3p    |
| C17orf85 | hsa-miR-597        |
| C17orf85 | hsa-miR-130b-5p    |
| C17orf85 | hsa-miR-584-3p     |
| C17orf85 | hsa-miR-7211-5p    |
| C17orf85 | hsa-miR-5124a      |
| C17orf85 | hsa-miR-2285x      |
| C17orf85 | hsa-miR-1343-3p    |
| C17orf85 | hsa-miR-424-5p     |
| C17orf85 | hsa-miR-2310       |
| C17orf85 | hsa-miR-7017-3p    |
| C17orf85 | hsa-miR-499b-3p    |
| C17orf85 | hsa-miR-5683       |
| C17orf85 | hsa-miR-136-5p     |
| C17orf85 | hsa-miR-3596c      |
| C17orf85 | hsa-miR-1255b-2-3p |
| C17orf85 | hsa-miR-7373a-3p   |
| C17orf85 | hsa-miR-3194-3p    |
| C17orf85 | hsa-miR-377-5p     |
| C17orf85 | hsa-miR-3972       |
| C17orf85 | hsa-miR-4514       |
| C17orf85 | hsa-miR-466mo-3p   |
| C17orf85 | hsa-miR-3682-5p    |
| C17orf85 | hsa-miR-10-5p      |
| C17orf85 | hsa-miR-6794-5p    |
| C17orf85 | hsa-miR-532-5p     |
| C17orf85 | hsa-miR-465c-5p    |
| C17orf85 | hsa-miR-3613b      |
| C17orf85 | hsa-miR-6873-5p    |
| C17orf85 | hsa-miR-15a-5p     |
| C17orf85 | hsa-miR-3123       |
| C17orf85 | hsa-miR-877-5p     |
| C17orf85 | hsa-miR-7977       |
| C17orf85 | hsa-miR-29b-5p     |
| C17orf85 | hsa-miR-544a       |
| C17orf85 | hsa-miR-425-3p     |
| C17orf85 | hsa-miR-7154-3p    |
| C17orf85 | hsa-miR-7660-3p    |
| C17orf85 | hsa-miR-4685-5p    |
| C17orf85 | hsa-miR-3662       |
| C17orf85 | hsa-miR-623        |
| C17orf85 | hsa-miR-6357       |
| C17orf85 | hsa-miR-2406       |
| C17orf85 | hsa-miR-1293       |
| C17orf85 | hsa-miR-6854-5p    |

|          |                  |
|----------|------------------|
| C17orf85 | hsa-miR-7157-3p  |
| C17orf85 | hsa-miR-190-3p   |
| C17orf85 | hsa-miR-487-5p   |
| C17orf85 | hsa-miR-147-5p   |
| C17orf85 | hsa-miR-4528     |
| C17orf85 | hsa-miR-3153     |
| C17orf85 | hsa-miR-2334     |
| C17orf85 | hsa-miR-4724-5p  |
| C17orf85 | hsa-miR-7667-5p  |
| C17orf85 | hsa-miR-2325     |
| C17orf85 | hsa-miR-6817-5p  |
| C17orf85 | hsa-miR-6814-5p  |
| C17orf85 | hsa-miR-5699-3p  |
| C17orf85 | hsa-miR-4781-3p  |
| C17orf85 | hsa-miR-1969     |
| C17orf85 | hsa-miR-7081-5p  |
| C17orf85 | hsa-miR-622      |
| C17orf85 | hsa-miR-3473g    |
| C17orf85 | hsa-miR-540-3p   |
| C17orf85 | hsa-miR-375      |
| C17orf85 | hsa-miR-3121-3p  |
| C17orf85 | hsa-miR-7171-5p  |
| C17orf85 | hsa-let-7        |
| C17orf85 | hsa-miR-7178-3p  |
| C17orf85 | hsa-miR-3613-3p  |
| C17orf85 | hsa-miR-1197-3p  |
| C17orf85 | hsa-miR-7181-3p  |
| C17orf85 | hsa-miR-3140-3p  |
| C17orf85 | hsa-miR-8890     |
| C17orf85 | hsa-miR-373-3p   |
| C17orf85 | hsa-miR-542      |
| C17orf85 | hsa-miR-7175-5p  |
| C17orf85 | hsa-miR-215-5p   |
| C17orf85 | hsa-miR-543      |
| C17orf85 | hsa-miR-758-5p   |
| C17orf85 | hsa-miR-203      |
| C17orf85 | hsa-miR-7850-5p  |
| C17orf85 | hsa-miR-19b-5p   |
| C17orf85 | hsa-miR-548b-3p  |
| C17orf85 | hsa-miR-7044-3p  |
| C17orf85 | hsa-miR-1243     |
| C17orf85 | hsa-miR-6973a-3p |
| C17orf85 | hsa-miR-208-3p   |
| C17orf85 | hsa-miR-130      |
| C17orf85 | hsa-miR-1954     |
| C17orf85 | hsa-miR-2313-5p  |



|          |                   |
|----------|-------------------|
| C17orf85 | hsa-miR-466b-4-3p |
| C17orf85 | hsa-miR-5692a     |
| C17orf85 | hsa-miR-369-3p    |
| C17orf85 | hsa-miR-4329      |
| C17orf85 | hsa-miR-7037-3p   |
| C17orf85 | hsa-miR-7175-3p   |
| C17orf85 | hsa-miR-145a-3p   |
| C17orf85 | hsa-miR-15b-5p    |
| C17orf85 | hsa-miR-338-3p    |
| C17orf85 | hsa-miR-510-5p    |
| C17orf85 | hsa-miR-3594-5p   |
| C17orf85 | hsa-miR-708-5p    |
| C17orf85 | hsa-miR-1288      |
| C17orf85 | hsa-miR-2895      |
| C17orf85 | hsa-miR-194-5p    |
| C17orf85 | hsa-miR-202-3p    |
| C17orf85 | hsa-miR-8815      |
| C17orf85 | hsa-miR-5006-3p   |
| C17orf85 | hsa-miR-3612      |
| C17orf85 | hsa-miR-2284g     |
| C17orf85 | hsa-miR-7450-5p   |
| C17orf85 | hsa-miR-26-5p     |
| C17orf85 | hsa-miR-3544-3p   |
| C17orf85 | hsa-miR-1696      |
| C17orf85 | hsa-miR-3144-5p   |
| C17orf85 | hsa-miR-8101      |
| C17orf85 | hsa-miR-3162-5p   |
| C17orf85 | hsa-miR-511-3p    |
| C17orf85 | hsa-miR-3548      |
| C17orf85 | hsa-miR-625-5p    |
| C17orf85 | hsa-miR-4763-5p   |
| C17orf85 | hsa-miR-6998-3p   |
| C17orf85 | hsa-miR-4691-5p   |
| C17orf85 | hsa-miR-1273g-3p  |
| C17orf85 | hsa-miR-3160-3p   |
| C17orf85 | hsa-miR-4264      |
| C17orf85 | hsa-miR-3100-5p   |
| C17orf85 | hsa-miR-4722-5p   |
| C17orf85 | hsa-miR-6872-3p   |
| C17orf85 | hsa-miR-7843-3p   |
| C17orf85 | hsa-let-7g-5p     |
| C17orf85 | hsa-miR-4510      |
| C17orf85 | hsa-miR-207       |
| C17orf85 | hsa-miR-551       |
| C17orf85 | hsa-miR-17-3p     |
| C17orf85 | hsa-miR-4705      |

|          |                   |
|----------|-------------------|
| C17orf85 | hsa-miR-1388-3p   |
| C17orf85 | hsa-miR-2300-3p   |
| C17orf85 | hsa-miR-7280-5p   |
| C17orf85 | hsa-miR-6939-5p   |
| C17orf85 | hsa-miR-466b-2-3p |
| C17orf85 | hsa-miR-691       |
| C17orf85 | hsa-miR-27-3p     |
| C17orf85 | hsa-miR-182-5p    |
| C17orf85 | hsa-miR-8904b     |
| C17orf85 | hsa-miR-4491      |
| C17orf85 | hsa-miR-5196-5p   |
| C17orf85 | hsa-miR-872       |
| C17orf85 | hsa-miR-6938-3p   |
| C17orf85 | hsa-miR-5004-5p   |
| C17orf85 | hsa-miR-1247-5p   |
| C17orf85 | hsa-miR-450a-1-3p |
| C17orf85 | hsa-miR-93-3p     |
| C17orf85 | hsa-miR-424-5p    |
| C17orf85 | hsa-miR-204-5p    |
| C17orf85 | hsa-miR-6822-5p   |
| C17orf85 | hsa-miR-693-5p    |
| C17orf85 | hsa-miR-1224      |
| C17orf85 | hsa-miR-674-5p    |
| C17orf85 | hsa-miR-7193-3p   |
| C17orf85 | hsa-miR-876-5p    |
| C17orf85 | hsa-miR-4255      |
| C17orf85 | hsa-miR-6529-3p   |
| C17orf85 | hsa-miR-5088-5p   |
| C17orf85 | hsa-miR-127-5p    |
| C17orf85 | hsa-miR-142b      |
| C17orf85 | hsa-miR-519-5p    |
| C17orf85 | hsa-miR-5110      |
| C17orf85 | hsa-miR-1281      |
| C17orf85 | hsa-miR-6983-5p   |
| C17orf85 | hsa-miR-4742-5p   |
| C17orf85 | hsa-miR-3577      |
| C17orf85 | hsa-miR-683       |
| C17orf85 | hsa-miR-7077-3p   |
| C17orf85 | hsa-miR-1178-3p   |
| C17orf85 | hsa-miR-3966      |
| C17orf85 | hsa-miR-378-3p    |
| C17orf85 | hsa-miR-149-5p    |
| C17orf85 | hsa-miR-4776-5p   |
| C17orf85 | hsa-miR-330-3p.1  |
| C17orf85 | hsa-miR-3475-5p   |
| C17orf85 | hsa-miR-5787      |

|          |                  |
|----------|------------------|
| C17orf85 | hsa-miR-6771-5p  |
| C17orf85 | hsa-miR-8832     |
| C17orf85 | hsa-miR-548b-5p  |
| C17orf85 | hsa-miR-4716     |
| C17orf85 | hsa-miR-7705     |
| C17orf85 | hsa-miR-1255b-5p |
| C17orf85 | hsa-miR-513c-3p  |
| C17orf85 | hsa-miR-143-3p   |
| C17orf85 | hsa-miR-502a     |
| C17orf85 | hsa-miR-7015-5p  |
| C17orf85 | hsa-miR-431-5p   |
| C17orf85 | hsa-miR-1708     |
| C17orf85 | hsa-miR-6836-5p  |
| C17orf85 | hsa-miR-6795-3p  |
| C17orf85 | hsa-miR-412-3p   |
| C17orf85 | hsa-miR-7657-3p  |
| C17orf85 | hsa-miR-4418     |
| C17orf85 | hsa-miR-138-1-3p |
| C17orf85 | hsa-miR-6827-5p  |
| C17orf85 | hsa-miR-3618     |
| C17orf85 | hsa-miR-619      |
| C17orf85 | hsa-miR-2477     |
| C17orf85 | hsa-miR-2442     |
| C17orf85 | hsa-miR-7661-5p  |
| C17orf85 | hsa-miR-350-3p   |
| C17orf85 | hsa-miR-3922-3p  |
| C17orf85 | hsa-miR-1956     |
| C17orf85 | hsa-miR-6694-3p  |
| C17orf85 | hsa-miR-548ah-5p |
| C17orf85 | hsa-miR-2400     |
| C17orf85 | hsa-miR-144-3p   |
| C17orf85 | hsa-miR-302d-5p  |
| C17orf85 | hsa-miR-654-5p   |
| C17orf85 | hsa-miR-8791     |
| C17orf85 | hsa-miR-194-5p   |
| C17orf85 | hsa-miR-702-3p   |
| C17orf85 | hsa-miR-573      |
| C17orf85 | hsa-miR-29a-5p   |
| C17orf85 | hsa-miR-541-3p   |
| C17orf85 | hsa-miR-2299-3p  |
| C17orf85 | hsa-miR-5006-5p  |
| C17orf85 | hsa-miR-221-3p   |
| C17orf85 | hsa-miR-374b-5p  |
| C17orf85 | hsa-miR-6690-5p  |
| C17orf85 | hsa-miR-3688-3p  |
| C17orf85 | hsa-miR-3529-3p  |

|          |                  |
|----------|------------------|
| C17orf85 | hsa-miR-2881     |
| C17orf85 | hsa-miR-4774-5p  |
| C17orf85 | hsa-miR-452-5p   |
| C17orf85 | hsa-miR-5009-3p  |
| C17orf85 | hsa-miR-4291     |
| C17orf85 | hsa-miR-4709-3p  |
| C17orf85 | hsa-miR-6499-3p  |
| C17orf85 | hsa-miR-4762-5p  |
| C17orf85 | hsa-miR-5687     |
| C17orf85 | hsa-miR-2284d    |
| C17orf85 | hsa-miR-548aa    |
| C17orf85 | hsa-miR-548g-3p  |
| C17orf85 | hsa-miR-6398     |
| C17orf85 | hsa-miR-23-3p    |
| C17orf85 | hsa-miR-548au-3p |
| C17orf85 | hsa-miR-505-3p   |
| C17orf85 | hsa-miR-2421     |
| C17orf85 | hsa-miR-758-3p   |
| C17orf85 | hsa-miR-5571-3p  |
| C17orf85 | hsa-miR-3646     |
| C17orf85 | hsa-miR-151      |
| C17orf85 | hsa-miR-1283     |
| C17orf85 | hsa-miR-8871     |
| C17orf85 | hsa-miR-3591-3p  |
| C17orf85 | hsa-miR-2324     |
| C17orf85 | hsa-miR-761      |
| C17orf85 | hsa-miR-2364     |
| C17orf85 | hsa-miR-2292     |
| C17orf85 | hsa-miR-302-5p   |
| C17orf85 | hsa-miR-1303     |
| C17orf85 | hsa-miR-6762-3p  |
| C17orf85 | hsa-miR-4439     |
| C17orf85 | hsa-miR-326      |
| C17orf85 | hsa-miR-4683     |
| C17orf85 | hsa-miR-15b-3p   |
| C17orf85 | hsa-miR-6663-5p  |
| C17orf85 | hsa-miR-614      |
| C17orf85 | hsa-miR-7079-3p  |
| C17orf85 | hsa-miR-1285-3p  |
| C17orf85 | hsa-miR-2284aa   |
| C17orf85 | hsa-miR-152-5p   |
| C17orf85 | hsa-miR-672-5p   |
| C17orf85 | hsa-miR-1781-3p  |
| C17orf85 | hsa-miR-4736     |
| C17orf85 | hsa-miR-6910-3p  |
| C17orf85 | hsa-miR-1252-5p  |

|          |                  |
|----------|------------------|
| C17orf85 | hsa-miR-7855-5p  |
| C17orf85 | hsa-miR-3572-5p  |
| C17orf85 | hsa-miR-4732-5p  |
| C17orf85 | hsa-miR-2394     |
| C17orf85 | hsa-miR-2387     |
| C17orf85 | hsa-miR-1306-5p  |
| C17orf85 | hsa-miR-2284b    |
| C17orf85 | hsa-miR-626      |
| C17orf85 | hsa-miR-429      |
| C17orf85 | hsa-miR-1298-5p  |
| C17orf85 | hsa-miR-742-3p   |
| C17orf85 | hsa-miR-4662-5p  |
| C17orf85 | hsa-miR-6907-5p  |
| C17orf85 | hsa-miR-658      |
| C17orf85 | hsa-miR-200c-3p  |
| C17orf85 | hsa-miR-3197     |
| C17orf85 | hsa-miR-3977     |
| C17orf85 | hsa-miR-6954-3p  |
| C17orf85 | hsa-miR-548aef   |
| C17orf85 | hsa-miR-6314     |
| C17orf85 | hsa-miR-4468     |
| C17orf85 | hsa-miR-7118-5p  |
| C17orf85 | hsa-miR-556-3p   |
| C17orf85 | hsa-miR-539-5p   |
| C17orf85 | hsa-miR-7107-5p  |
| C17orf85 | hsa-miR-105b     |
| C17orf85 | hsa-miR-883ab-3p |
| C17orf85 | hsa-miR-4652-5p  |
| C17orf85 | hsa-miR-292-5p   |
| C17orf85 | hsa-miR-2285z    |
| C17orf85 | hsa-miR-6777-3p  |
| C17orf85 | hsa-miR-363-5p   |
| C17orf85 | hsa-miR-508b     |
| C17orf85 | hsa-miR-576-3p   |
| C17orf85 | hsa-miR-1271-5p  |
| C17orf85 | hsa-miR-2456     |
| C17orf85 | hsa-miR-370-3p   |
| C17orf85 | hsa-miR-7151-5p  |
| C17orf85 | hsa-miR-4297     |
| C17orf85 | hsa-miR-4274     |
| C17orf85 | hsa-miR-4257     |
| C17orf85 | hsa-miR-4518     |
| C17orf85 | hsa-miR-8063     |
| C17orf85 | hsa-miR-21-3p    |
| C17orf85 | hsa-miR-1654     |
| C17orf85 | hsa-miR-8795     |

|          |                 |
|----------|-----------------|
| C17orf85 | hsa-miR-3557-3p |
| C17orf85 | hsa-miR-7077-5p |
| C17orf85 | hsa-miR-148-5p  |
| C17orf85 | hsa-miR-7216-3p |
| C17orf85 | hsa-miR-3061-5p |
| C17orf85 | hsa-miR-8821    |
| C17orf85 | hsa-miR-4796-5p |
| C17orf85 | hsa-miR-7028-3p |
| C17orf85 | hsa-miR-2360    |
| C17orf85 | hsa-miR-4789-5p |
| C17orf85 | hsa-miR-1243-3p |
| C17orf85 | hsa-miR-328     |
| C17orf85 | hsa-miR-3925-3p |
| C17orf85 | hsa-miR-3606-5p |
| C17orf85 | hsa-miR-4701-3p |
| C17orf85 | hsa-let-7f-5p   |
| C17orf85 | hsa-miR-4758-3p |
| C17orf85 | hsa-miR-412     |
| C17orf85 | hsa-miR-582-3p  |
| C17orf85 | hsa-miR-883b-5p |
| C17orf85 | hsa-miR-1758    |
| C17orf85 | hsa-miR-6809-3p |
| C17orf85 | hsa-miR-376b-5p |
| C17orf85 | hsa-miR-130a-5p |
| C17orf85 | hsa-miR-3664-5p |
| C17orf85 | hsa-miR-19      |
| C17orf85 | hsa-miR-888-5p  |
| C17orf85 | hsa-miR-548j-5p |
| C17orf85 | hsa-miR-495-3p  |
| C17orf85 | hsa-miR-1225-5p |
| C17orf85 | hsa-miR-518-5p  |
| C17orf85 | hsa-miR-1457    |
| C17orf85 | hsa-miR-562     |
| C17orf85 | hsa-miR-6917-3p |
| C17orf85 | hsa-miR-6858-3p |
| C17orf85 | hsa-miR-295-5p  |
| C17orf85 | hsa-miR-2399-5p |
| C17orf85 | hsa-miR-4684-5p |
| C17orf85 | hsa-miR-889-5p  |
| C17orf85 | hsa-miR-344g    |
| C17orf85 | hsa-miR-4516    |
| C17orf85 | hsa-miR-6833-3p |
| C17orf85 | hsa-miR-664-3p  |
| C17orf85 | hsa-miR-8060    |
| C17orf85 | hsa-miR-6358    |
| C17orf85 | hsa-miR-4280    |

|          |                  |
|----------|------------------|
| C17orf85 | hsa-miR-3180-5p  |
| C17orf85 | hsa-miR-509-3-5p |
| C17orf85 | hsa-miR-383-5p   |
| C17orf85 | hsa-miR-6503-3p  |
| C17orf85 | hsa-miR-764-5p   |
| C17orf85 | hsa-miR-3925-5p  |
| C17orf85 | hsa-miR-4638-5p  |
| C17orf85 | hsa-miR-323a-5p  |
| C17orf85 | hsa-miR-8117     |
| C17orf85 | hsa-miR-6119-3p  |
| C17orf85 | hsa-miR-432-5p   |
| C17orf85 | hsa-miR-642b-5p  |
| C17orf85 | hsa-miR-6738-3p  |
| C17orf85 | hsa-miR-5710     |
| C17orf85 | hsa-miR-144-3p   |
| C17orf85 | hsa-miR-3088-3p  |
| C17orf85 | hsa-miR-1764-3p  |
| C17orf85 | hsa-miR-8059     |
| C17orf85 | hsa-miR-760      |
| C17orf85 | hsa-miR-4698     |
| C17orf85 | hsa-miR-7202-5p  |
| C17orf85 | hsa-miR-1255a    |
| C17orf85 | hsa-miR-6998-5p  |
| C17orf85 | hsa-miR-566      |
| C17orf85 | hsa-miR-1958     |
| C17orf85 | hsa-miR-513b-3p  |
| C17orf85 | hsa-miR-6083     |
| C17orf85 | hsa-miR-6350     |
| C17orf85 | hsa-miR-9-3-3p   |
| C17orf85 | hsa-miR-7650-3p  |
| C17orf85 | hsa-miR-1964-5p  |
| C17orf85 | hsa-miR-6076     |
| C17orf85 | hsa-miR-4446-3p  |
| C17orf85 | hsa-miR-1537-5p  |
| C17orf85 | hsa-miR-7013-3p  |
| C17orf85 | hsa-miR-369-3p   |
| C17orf85 | hsa-miR-4755-5p  |
| C17orf85 | hsa-miR-6959-5p  |
| C17orf85 | hsa-miR-1704     |
| C17orf85 | hsa-miR-421-5p   |
| C17orf85 | hsa-miR-4778-3p  |
| C17orf85 | hsa-miR-6848-3p  |
| C17orf85 | hsa-miR-7085-3p  |
| C17orf85 | hsa-miR-2284m    |
| C17orf85 | hsa-miR-497-5p   |
| C17orf85 | hsa-miR-4492     |

|          |                  |
|----------|------------------|
| C17orf85 | hsa-miR-210      |
| C17orf85 | hsa-miR-3167-5p  |
| C17orf85 | hsa-miR-499b-5p  |
| C17orf85 | hsa-miR-6739-5p  |
| C17orf85 | hsa-miR-1323     |
| C17orf85 | hsa-miR-2889     |
| C17orf85 | hsa-miR-300      |
| C17orf85 | hsa-miR-4647     |
| C17orf85 | hsa-miR-467a-5p  |
| C17orf85 | hsa-miR-483-3p.1 |
| C17orf85 | hsa-miR-6680-3p  |
| C17orf85 | hsa-miR-6828-3p  |
| C17orf85 | hsa-miR-293-5p   |
| C17orf85 | hsa-miR-8868     |
| C17orf85 | hsa-miR-670-3p   |
| C17orf85 | hsa-miR-153-3p   |
| C17orf85 | hsa-miR-3127-5p  |
| C17orf85 | hsa-miR-129b-3p  |
| C17orf85 | hsa-miR-6530     |
| C17orf85 | hsa-miR-136-3p   |
| C17orf85 | hsa-miR-294-3p   |
| C17orf85 | hsa-miR-7201-5p  |
| C17orf85 | hsa-miR-1185-3p  |
| C17orf85 | hsa-miR-7155-5p  |
| C17orf85 | hsa-miR-6969-5p  |
| C17orf85 | hsa-miR-7220-5p  |
| C17orf85 | hsa-miR-219-3p   |
| C17orf85 | hsa-miR-8841     |
| C17orf85 | hsa-miR-1930-3p  |
| C17orf85 | hsa-miR-1841     |
| C17orf85 | hsa-miR-1270     |
| C17orf85 | hsa-miR-502-5p   |
| C17orf85 | hsa-miR-676-3p   |
| C17orf85 | hsa-miR-29e      |
| C17orf85 | hsa-miR-6362     |
| C17orf85 | hsa-miR-5001-3p  |
| C17orf85 | hsa-miR-2362     |
| C17orf85 | hsa-miR-5586-3p  |
| C17orf85 | hsa-miR-1323-5p  |
| C17orf85 | hsa-miR-342-3p   |
| C17orf85 | hsa-miR-1245a    |
| C17orf85 | hsa-miR-203b-3p  |
| C17orf85 | hsa-miR-669bf-3p |
| C17orf85 | hsa-miR-802      |
| C17orf85 | hsa-miR-1835     |
| C17orf85 | hsa-miR-298-5p   |



|          |                  |
|----------|------------------|
| C17orf85 | hsa-miR-15-5p    |
| C17orf85 | hsa-miR-5107-5p  |
| C17orf85 | hsa-miR-7170-3p  |
| C17orf85 | hsa-miR-6817-3p  |
| C17orf85 | hsa-miR-558      |
| C17orf85 | hsa-miR-2452     |
| C17orf85 | hsa-miR-6950-3p  |
| C17orf85 | hsa-miR-3978     |
| C17orf85 | hsa-miR-6918-3p  |
| C17orf85 | hsa-miR-193a-5p  |
| C17orf85 | hsa-miR-675-3p   |
| C17orf85 | hsa-miR-6513-5p  |
| C17orf85 | hsa-miR-7184-3p  |
| C17orf85 | hsa-miR-200ab-5p |
| C17orf85 | hsa-miR-182-3p   |
| C17orf85 | hsa-miR-3616-5p  |
| C17orf85 | hsa-miR-344-3p   |
| C17orf85 | hsa-miR-6742-5p  |
| C17orf85 | hsa-miR-6727-3p  |
| C17orf85 | hsa-miR-1178-5p  |
| C17orf85 | hsa-miR-7047-5p  |
| C17orf85 | hsa-miR-125a-3p  |
| C17orf85 | hsa-miR-4251     |
| C17orf85 | hsa-miR-889      |
| C17orf85 | hsa-miR-3914     |
| C17orf85 | hsa-miR-6837-5p  |
| C17orf85 | hsa-miR-671-5p   |
| C17orf85 | hsa-miR-3667-3p  |
| C17orf85 | hsa-miR-2485     |
| C17orf85 | hsa-miR-6812-5p  |
| C17orf85 | hsa-miR-1302     |
| C17orf85 | hsa-miR-2917     |
| C17orf85 | hsa-miR-6119-5p  |
| C17orf85 | hsa-miR-450b-5p  |
| C17orf85 | hsa-miR-8889     |
| C17orf85 | hsa-miR-7073-3p  |
| C17orf85 | hsa-miR-1468-3p  |
| C17orf85 | hsa-miR-28-5p    |
| C17orf85 | hsa-miR-743-5p   |
| C17orf85 | hsa-miR-221-5p   |
| C17orf85 | hsa-miR-150-5p   |
| C17orf85 | hsa-miR-1234-3p  |
| C17orf85 | hsa-miR-7183-3p  |
| C17orf85 | hsa-miR-6749-5p  |
| C17orf85 | hsa-miR-4753-3p  |
| C17orf85 | hsa-miR-3060-3p  |

|          |                  |
|----------|------------------|
| C17orf85 | hsa-miR-137      |
| C17orf85 | hsa-miR-4261     |
| C17orf85 | hsa-miR-3558-3p  |
| C17orf85 | hsa-miR-151-3p   |
| C17orf85 | hsa-miR-3176     |
| C17orf85 | hsa-miR-326-3p   |
| C17orf85 | hsa-miR-764-3p   |
| C17orf85 | hsa-miR-455-3p.2 |
| C17orf85 | hsa-miR-10       |
| C17orf85 | hsa-miR-4436b-3p |
| C17orf85 | hsa-miR-183-5p   |
| C17orf85 | hsa-miR-7218-5p  |
| C17orf85 | hsa-miR-347      |
| C17orf85 | hsa-miR-6955-5p  |
| C17orf85 | hsa-miR-660-3p   |
| C17orf85 | hsa-miR-28-5p    |
| C17orf85 | hsa-miR-1285-5p  |
| C17orf85 | hsa-miR-1842     |
| C17orf85 | hsa-miR-7865     |
| C17orf85 | hsa-miR-7676-5p  |
| C17orf85 | hsa-miR-4632-5p  |
| C17orf85 | hsa-miR-3083-5p  |
| C17orf85 | hsa-miR-7978     |
| C17orf85 | hsa-miR-208a-3p  |
| C17orf85 | hsa-miR-936      |
| C17orf85 | hsa-miR-2449     |
| C17orf85 | hsa-miR-2300-5p  |
| C17orf85 | hsa-miR-599      |
| C17orf85 | hsa-miR-3072-3p  |
| C17orf85 | hsa-miR-6921-3p  |
| C17orf85 | hsa-miR-3136-5p  |
| C17orf85 | hsa-miR-7042-3p  |
| C17orf85 | hsa-miR-4639-5p  |
| C17orf85 | hsa-miR-4505     |
| C17orf85 | hsa-miR-6988-5p  |
| C17orf85 | hsa-miR-6379     |
| C17orf85 | hsa-miR-6733-5p  |
| C17orf85 | hsa-miR-6927-3p  |
| C17orf85 | hsa-miR-4284     |
| C17orf85 | hsa-miR-496a-5p  |
| C17orf85 | hsa-miR-548bb-3p |
| C17orf85 | hsa-miR-10b-3p   |
| C17orf85 | hsa-miR-7231-5p  |
| C17orf85 | hsa-miR-3584-5p  |
| C17orf85 | hsa-miR-4693-3p  |
| C17orf85 | hsa-miR-7053-5p  |

|          |                    |
|----------|--------------------|
| C17orf85 | hsa-miR-2110       |
| C17orf85 | hsa-miR-7655-3p    |
| C17orf85 | hsa-miR-6333       |
| C17orf85 | hsa-miR-380-5p     |
| C17orf85 | hsa-miR-7578       |
| C17orf85 | hsa-miR-892-3p     |
| C17orf85 | hsa-miR-501-5p     |
| C17orf85 | hsa-miR-193-5p     |
| C17orf85 | hsa-miR-694        |
| C17orf85 | hsa-miR-4723-5p    |
| C17orf85 | hsa-miR-5582-3p    |
| C17orf85 | hsa-miR-1299       |
| C17orf85 | hsa-miR-105-5p     |
| C17orf85 | hsa-miR-362-3p     |
| C17orf85 | hsa-miR-3127-3p    |
| C17orf85 | hsa-miR-1825       |
| C17orf85 | hsa-miR-1184       |
| C17orf85 | hsa-miR-6962-5p    |
| C17orf85 | hsa-miR-7202-3p    |
| C17orf85 | hsa-miR-8087       |
| C17orf85 | hsa-miR-6895-3p    |
| C17orf85 | hsa-miR-7119-3p    |
| C17orf85 | hsa-miR-3583-5p    |
| C17orf85 | hsa-miR-6882-3p    |
| C17orf85 | hsa-miR-7668-3p    |
| C17orf85 | hsa-miR-4446       |
| C17orf85 | hsa-let-7c-1-3p    |
| C17orf85 | hsa-miR-7094b-2-5p |
| C17orf85 | hsa-miR-5194       |
| C17orf85 | hsa-miR-7242-3p    |
| C17orf85 | hsa-miR-3596d      |
| C17orf85 | hsa-miR-502b       |
| C17orf85 | hsa-miR-669m-5p    |
| C17orf85 | hsa-miR-525-5p     |
| C17orf85 | hsa-miR-548i-3p    |
| C17orf85 | hsa-miR-16-1-3p    |
| C17orf85 | hsa-miR-218-2-3p   |
| C17orf85 | hsa-miR-6727-5p    |
| C17orf85 | hsa-miR-345-3p     |
| C17orf85 | hsa-miR-4524a-5p   |
| C17orf85 | hsa-miR-713        |
| C17orf85 | hsa-miR-7013-5p    |
| C17orf85 | hsa-miR-411-3p     |
| C17orf85 | hsa-miR-3137       |
| C17orf85 | hsa-miR-4508       |
| C17orf85 | hsa-miR-330-5p     |

|          |                 |
|----------|-----------------|
| C17orf85 | hsa-miR-106-5p  |
| C17orf85 | hsa-miR-6715-3p |
| C17orf85 | hsa-miR-7648-3p |
| C17orf85 | hsa-miR-7067-5p |
| C17orf85 | hsa-miR-3078-5p |
| C17orf85 | hsa-miR-1271-3p |
| C17orf85 | hsa-miR-495-5p  |
| C17orf85 | hsa-miR-7045-3p |
| C17orf85 | hsa-miR-1651-3p |
| C17orf85 | hsa-miR-215     |
| C17orf85 | hsa-miR-3105-3p |
| C17orf85 | hsa-miR-6920-5p |
| C17orf85 | hsa-miR-4700-5p |
| C17orf85 | hsa-miR-292a-3p |
| C17orf85 | hsa-miR-3688-5p |
| C17orf85 | hsa-miR-4731-5p |
| C17orf85 | hsa-miR-4259    |
| C17orf85 | hsa-miR-96-3p   |
| C17orf85 | hsa-miR-196     |
| C17orf85 | hsa-miR-299     |
| C17orf85 | hsa-miR-642a-5p |
| C17orf85 | hsa-miR-3916    |
| C17orf85 | hsa-miR-4678    |
| C17orf85 | hsa-miR-290     |
| C17orf85 | hsa-miR-216b-3p |
| C17orf85 | hsa-miR-2461-5p |
| C17orf85 | hsa-miR-3658    |
| C17orf85 | hsa-miR-7049-3p |
| C17orf85 | hsa-miR-2368-3p |
| C17orf85 | hsa-miR-7159-5p |
| C17orf85 | hsa-miR-744-5p  |
| C17orf85 | hsa-miR-6929-5p |
| C17orf85 | hsa-miR-4685-3p |
| C17orf85 | hsa-miR-593-3p  |
| C17orf85 | hsa-miR-200c-3p |
| C17orf85 | hsa-miR-19-3p   |
| C17orf85 | hsa-miR-331-3p  |
| C17orf85 | hsa-miR-6571-3p |
| C17orf85 | hsa-miR-1894-3p |
| C17orf85 | hsa-miR-1208    |
| C17orf85 | hsa-miR-4686    |
| C17orf85 | hsa-miR-8894    |
| C17orf85 | hsa-miR-6737-5p |
| C17orf85 | hsa-miR-6860    |
| C17orf85 | hsa-miR-2396    |
| C17orf85 | hsa-miR-7173-3p |

|          |                  |
|----------|------------------|
| C17orf85 | hsa-miR-3067-5p  |
| C17orf85 | hsa-miR-3533     |
| C17orf85 | hsa-miR-1273f    |
| C17orf85 | hsa-miR-6883-3p  |
| C17orf85 | hsa-miR-139-3p   |
| C17orf85 | hsa-miR-197-3p   |
| C17orf85 | hsa-miR-6870-5p  |
| C17orf85 | hsa-miR-6528     |
| C17orf85 | hsa-miR-7052-3p  |
| C17orf85 | hsa-miR-6758-5p  |
| C17orf85 | hsa-miR-1712-3p  |
| C17orf85 | hsa-miR-201-3p   |
| C17orf85 | hsa-miR-5134-5p  |
| C17orf85 | hsa-miR-649      |
| C17orf85 | hsa-miR-183-3p   |
| C17orf85 | hsa-miR-327      |
| C17orf85 | hsa-miR-378      |
| C17orf85 | hsa-miR-199      |
| C17orf85 | hsa-miR-3158-5p  |
| C17orf85 | hsa-miR-5680     |
| C17orf85 | hsa-miR-8079     |
| C17orf85 | hsa-miR-5739     |
| C17orf85 | hsa-miR-6728-5p  |
| C17orf85 | hsa-miR-653-5p   |
| C17orf85 | hsa-miR-23-5p    |
| C17orf85 | hsa-miR-4513     |
| C17orf85 | hsa-miR-192-3p   |
| C17orf85 | hsa-miR-523-3p   |
| C17orf85 | hsa-miR-128      |
| C17orf85 | hsa-miR-29b-1-5p |
| C17orf85 | hsa-miR-892a     |
| C17orf85 | hsa-miR-483-3p   |
| C17orf85 | hsa-miR-6765-3p  |
| C17orf85 | hsa-miR-6944-3p  |
| C17orf85 | hsa-miR-7370-5p  |
| C17orf85 | hsa-miR-7669-3p  |
| C17orf85 | hsa-miR-135-5p   |
| C17orf85 | hsa-miR-551b-5p  |
| C17orf85 | hsa-miR-24-3p    |
| C17orf85 | hsa-miR-6868-3p  |
| C17orf85 | hsa-miR-1434-5p  |
| C17orf85 | hsa-miR-192-5p   |
| C17orf85 | hsa-miR-6659-3p  |
| C17orf85 | hsa-miR-7113-5p  |
| C17orf85 | hsa-miR-1587     |
| C17orf85 | hsa-miR-3564     |

|          |                 |
|----------|-----------------|
| C17orf85 | hsa-miR-590-3p  |
| C17orf85 | hsa-miR-1836    |
| C17orf85 | hsa-miR-467-3p  |
| C17orf85 | hsa-miR-6828-5p |
| C17orf85 | hsa-miR-6714-3p |
| C17orf85 | hsa-miR-4638-3p |
| C17orf85 | hsa-miR-6931-5p |
| C17orf85 | hsa-miR-2114-5p |
| C17orf85 | hsa-miR-6886-3p |
| C17orf85 | hsa-miR-4765    |
| C17orf85 | hsa-miR-2479    |
| C17orf85 | hsa-let-7f-2-3p |
| C17orf85 | hsa-miR-6981-5p |
| C17orf85 | hsa-miR-6797-5p |
| C17orf85 | hsa-miR-1434-3p |
| C17orf85 | hsa-miR-3091-3p |
| C17orf85 | hsa-miR-5129-5p |
| C17orf85 | hsa-miR-6724-5p |
| C17orf85 | hsa-miR-520gh   |
| C17orf85 | hsa-miR-4482-5p |
| C17orf85 | hsa-miR-454-5p  |
| C17orf85 | hsa-miR-133b-5p |
| C17orf85 | hsa-miR-701-3p  |
| C17orf85 | hsa-miR-7048-3p |
| C17orf85 | hsa-miR-4797-5p |
| C17orf85 | hsa-miR-6588-3p |
| C17orf85 | hsa-miR-2323    |
| C17orf85 | hsa-miR-548w    |
| C17orf85 | hsa-miR-4780    |
| C17orf85 | hsa-miR-8847    |
| C17orf85 | hsa-miR-6818-5p |
| C17orf85 | hsa-miR-6909-3p |
| C17orf85 | hsa-miR-5583-5p |
| C17orf85 | hsa-miR-6774-5p |
| C17orf85 | hsa-miR-5002-5p |
| C17orf85 | hsa-miR-4706    |
| C17orf85 | hsa-miR-677     |
| C17orf85 | hsa-miR-4432    |
| C17orf85 | hsa-miR-3544    |
| C17orf85 | hsa-miR-1914-5p |
| C17orf85 | hsa-miR-6999-5p |
| C17orf85 | hsa-miR-548h-3p |
| C17orf85 | hsa-miR-202-3p  |
| C17orf85 | hsa-miR-7066-5p |
| C17orf85 | hsa-miR-290b-3p |
| C17orf85 | hsa-miR-4729    |

|          |                  |
|----------|------------------|
| C17orf85 | hsa-miR-1182     |
| C17orf85 | hsa-miR-409-5p   |
| C17orf85 | hsa-miR-383-5p.2 |
| C17orf85 | hsa-miR-4646-5p  |
| C17orf85 | hsa-miR-100-3p   |
| C17orf85 | hsa-miR-130ac-5p |
| C17orf85 | hsa-miR-7844-5p  |
| C17orf85 | hsa-miR-629-5p   |
| C17orf85 | hsa-miR-1269a    |
| C17orf85 | hsa-miR-2313-3p  |
| C17orf85 | hsa-miR-291-5p   |
| C17orf85 | hsa-miR-7088-5p  |
| C17orf85 | hsa-miR-572      |
| C17orf85 | hsa-miR-548at-3p |
| C17orf85 | hsa-miR-3973     |
| C17orf85 | hsa-miR-1290     |
| C17orf85 | hsa-miR-568      |
| C17orf85 | hsa-miR-8818     |
| C17orf85 | hsa-miR-666-5p   |
| C17orf85 | hsa-miR-6833-5p  |
| C17orf85 | hsa-miR-3935     |
| C17orf85 | hsa-miR-4526     |
| C17orf85 | hsa-miR-2374     |
| C17orf85 | hsa-miR-6967-3p  |
| C17orf85 | hsa-miR-4453     |
| C17orf85 | hsa-miR-8814     |
| C17orf85 | hsa-miR-2284c    |
| C17orf85 | hsa-miR-3664-5p  |
| C17orf85 | hsa-miR-2464-5p  |
| C17orf85 | hsa-miR-6756-3p  |
| C17orf85 | hsa-miR-301-3p   |
| C17orf85 | hsa-miR-4667-3p  |
| C17orf85 | hsa-miR-4515     |
| C17orf85 | hsa-miR-548t-3p  |
| C17orf85 | hsa-miR-548as-5p |
| C17orf85 | hsa-miR-133c-5p  |
| C17orf85 | hsa-miR-6785-5p  |
| C17orf85 | hsa-miR-302a-5p  |
| C17orf85 | hsa-miR-193a     |
| C17orf85 | hsa-miR-330-3p   |
| C17orf85 | hsa-miR-425-5p   |
| C17orf85 | hsa-miR-7162-5p  |
| C17orf85 | hsa-miR-547-3p   |
| C17orf85 | hsa-miR-2453     |
| C17orf85 | hsa-miR-1839-5p  |
| C17orf85 | hsa-miR-516b-5p  |

|          |                  |
|----------|------------------|
| C17orf85 | hsa-miR-138-5p   |
| C17orf85 | hsa-miR-210-5p   |
| C17orf85 | hsa-miR-6376     |
| C17orf85 | hsa-miR-7235-3p  |
| C17orf85 | hsa-miR-6371     |
| C17orf85 | hsa-miR-4436b-5p |
| C17orf85 | hsa-miR-548p     |
| C17orf85 | hsa-miR-6762-5p  |
| C17orf85 | hsa-miR-6512-5p  |
| C17orf85 | hsa-miR-548am-3p |
| C17orf85 | hsa-miR-548f-3p  |
| C17orf85 | hsa-miR-2315     |
| C17orf85 | hsa-let-7i-3p    |
| C17orf85 | hsa-miR-344b-3p  |
| C17orf85 | hsa-miR-6941-3p  |
| C17orf85 | hsa-miR-466-5p   |
| C17orf85 | hsa-miR-596      |
| C17orf85 | hsa-miR-6780a-3p |
| C17orf85 | hsa-miR-4531     |
| C17orf85 | hsa-miR-589-5p   |
| C17orf85 | hsa-miR-549-5p   |
| C17orf85 | hsa-miR-499b-3p  |
| C17orf85 | hsa-miR-15       |
| C17orf85 | hsa-miR-8808     |
| C17orf85 | hsa-miR-7230-5p  |
| C17orf85 | hsa-miR-6769b-5p |
| C17orf85 | hsa-miR-3689f    |
| C17orf85 | hsa-miR-543-5p   |
| C17orf85 | hsa-miR-4717-3p  |
| C17orf85 | hsa-miR-5046     |
| C17orf85 | hsa-miR-1976     |
| C17orf85 | hsa-miR-883-3p   |
| C17orf85 | hsa-miR-513a-5p  |
| C17orf85 | hsa-miR-939-3p   |
| C17orf85 | hsa-miR-494-3p   |
| C17orf85 | hsa-miR-1909-3p  |
| C17orf85 | hsa-miR-219b     |
| C17orf85 | hsa-miR-6975-5p  |
| C17orf85 | hsa-miR-3121-3p  |
| C17orf85 | hsa-miR-2424     |
| C17orf85 | hsa-miR-3063-3p  |
| C17orf85 | hsa-miR-4325     |
| C17orf85 | hsa-miR-1265     |
| C17orf85 | hsa-miR-6334     |
| C17orf85 | hsa-miR-7211-3p  |
| C17orf85 | hsa-miR-3175     |



|          |                  |
|----------|------------------|
| C17orf85 | hsa-miR-6720-5p  |
| C17orf85 | hsa-miR-6769a-5p |
| C17orf85 | hsa-miR-4799-5p  |
| C17orf85 | hsa-miR-139-5p   |
| C17orf85 | hsa-miR-668      |
| C17orf85 | hsa-miR-296-5p   |
| C17orf85 | hsa-miR-6322     |
| C17orf85 | hsa-miR-7196-5p  |
| C17orf85 | hsa-miR-9769-5p  |
| C17orf85 | hsa-miR-6417     |
| C17orf85 | hsa-miR-2431-3p  |
| C17orf85 | hsa-miR-2285n    |
| C17orf85 | hsa-miR-711      |
| C17orf85 | hsa-miR-6387     |
| C17orf85 | hsa-miR-6847-5p  |
| C17orf85 | hsa-miR-135b-3p  |
| C17orf85 | hsa-miR-548aq-3p |
| C17orf85 | hsa-miR-322-3p   |
| C17orf85 | hsa-miR-27b-3p   |
| C17orf85 | hsa-miR-507      |
| C17orf85 | hsa-miR-8908-3p  |
| C17orf85 | hsa-miR-433-3p   |
| C17orf85 | hsa-miR-155-3p   |
| C17orf85 | hsa-miR-744-3p   |
| C17orf85 | hsa-miR-520g-5p  |
| C17orf85 | hsa-miR-4299     |
| C17orf85 | hsa-miR-8903     |
| C17orf85 | hsa-miR-4459     |
| C17orf85 | hsa-miR-24-3p    |
| C17orf85 | hsa-miR-6883-5p  |
| C17orf85 | hsa-miR-522-3p   |
| C17orf85 | hsa-miR-6924-5p  |
| C17orf85 | hsa-miR-7168-5p  |
| C17orf85 | hsa-miR-7306-5p  |
| C17orf85 | hsa-miR-879-3p   |
| C17orf85 | hsa-miR-4469     |
| C17orf85 | hsa-miR-4311     |
| C17orf85 | hsa-miR-6132     |
| C17orf85 | hsa-miR-4771     |
| C17orf85 | hsa-miR-6904-5p  |
| C17orf85 | hsa-miR-500      |
| C17orf85 | hsa-miR-6516-3p  |
| C17orf85 | hsa-miR-7207-3p  |
| C17orf85 | hsa-miR-6776-5p  |
| C17orf85 | hsa-miR-4659a-5p |
| C17orf85 | hsa-miR-217-3p   |

|          |                  |
|----------|------------------|
| C17orf85 | hsa-miR-1260b    |
| C17orf85 | hsa-miR-27       |
| C17orf85 | hsa-miR-1972     |
| C17orf85 | hsa-miR-6894-3p  |
| C17orf85 | hsa-miR-202-5p   |
| C17orf85 | hsa-miR-6920-3p  |
| C17orf85 | hsa-miR-5196-3p  |
| C17orf85 | hsa-miR-3622b-3p |
| C17orf85 | hsa-miR-4535     |
| C17orf85 | hsa-miR-1942     |
| C17orf85 | hsa-miR-99b-3p   |
| C17orf85 | hsa-miR-4745-5p  |
| C17orf85 | hsa-miR-2284j    |
| C17orf85 | hsa-miR-548aw    |
| C17orf85 | hsa-miR-6372     |
| C17orf85 | hsa-miR-612      |
| C17orf85 | hsa-miR-3090-5p  |
| C17orf85 | hsa-miR-1197-5p  |
| C17orf85 | hsa-miR-490-5p   |
| C17orf85 | hsa-miR-1839-3p  |
| C17orf85 | hsa-miR-499a-3p  |
| C17orf85 | hsa-miR-7215-3p  |
| C17orf85 | hsa-miR-4732-3p  |
| C17orf85 | hsa-let-7c-3p    |
| C17orf85 | hsa-miR-2439-3p  |
| C17orf85 | hsa-miR-1227-3p  |
| C17orf85 | hsa-miR-219b-3p  |
| C17orf85 | hsa-miR-3653-5p  |
| C17orf85 | hsa-miR-7036b-3p |
| C17orf85 | hsa-miR-381-3p   |
| C17orf85 | hsa-miR-668-5p   |
| C17orf85 | hsa-miR-7063-3p  |
| C17orf85 | hsa-miR-7090-5p  |
| C17orf85 | hsa-miR-2426     |
| C17orf85 | hsa-miR-33-5p    |
| C17orf85 | hsa-miR-2322-5p  |
| C17orf85 | hsa-miR-6519     |
| C17orf85 | hsa-miR-376c     |
| C17orf85 | hsa-miR-101-3p   |
| C17orf85 | hsa-miR-570-3p   |
| C17orf85 | hsa-miR-8056     |
| C17orf85 | hsa-miR-1298     |
| C17orf85 | hsa-miR-8066     |
| C17orf85 | hsa-miR-6944-5p  |
| C17orf85 | hsa-miR-4265     |
| C17orf85 | hsa-miR-6418-3p  |

|          |                  |
|----------|------------------|
| C17orf85 | hsa-miR-4703-5p  |
| C17orf85 | hsa-miR-103b     |
| C17orf85 | hsa-miR-92a-1-5p |
| C17orf85 | hsa-miR-3593-5p  |
| C17orf85 | hsa-miR-5626-3p  |
| C17orf85 | hsa-miR-5581-5p  |
| C17orf85 | hsa-miR-455-3p   |
| C17orf85 | hsa-miR-4483     |
| C17orf85 | hsa-miR-556-5p   |
| C17orf85 | hsa-miR-6818-3p  |
| C17orf85 | hsa-miR-330-3p   |
| C17orf85 | hsa-miR-3924     |
| C17orf85 | hsa-miR-762      |
| C17orf85 | hsa-miR-615-3p   |
| C17orf85 | hsa-miR-6875-3p  |
| C17orf85 | hsa-miR-139-5p   |
| C17orf85 | hsa-miR-8892     |
| C17orf85 | hsa-miR-294      |
| C17orf85 | hsa-miR-5619-3p  |
| C17orf85 | hsa-miR-6981-3p  |
| C17orf85 | hsa-miR-455-5p   |
| C17orf85 | hsa-miR-4659b-5p |
| C17orf85 | hsa-miR-7156-3p  |
| C17orf85 | hsa-miR-3102-3p  |
| C17orf85 | hsa-miR-34a-3p   |
| C17orf85 | hsa-miR-7051-3p  |
| C17orf85 | hsa-miR-6516-5p  |
| C17orf85 | hsa-miR-4772-3p  |
| C17orf85 | hsa-miR-3556a    |
| C17orf85 | hsa-miR-548ap-5p |
| C17orf85 | hsa-miR-4690-5p  |
| C17orf85 | hsa-miR-8800     |
| C17orf85 | hsa-miR-2367-3p  |
| C17orf85 | hsa-miR-8904a    |
| C17orf85 | hsa-miR-7082-3p  |
| C17orf85 | hsa-miR-891-3p   |
| C17orf85 | hsa-miR-1231-5p  |
| C17orf85 | hsa-miR-655      |
| C17orf85 | hsa-miR-616-5p   |
| C17orf85 | hsa-miR-148-3p   |
| C17orf85 | hsa-miR-7160-3p  |
| C17orf85 | hsa-miR-382-5p   |
| C17orf85 | hsa-miR-3200-5p  |
| C17orf85 | hsa-miR-675-5p   |
| C17orf85 | hsa-miR-3689b-5p |
| C17orf85 | hsa-miR-323-3p   |

|          |                  |
|----------|------------------|
| C17orf85 | hsa-miR-6759-3p  |
| C17orf85 | hsa-miR-295-3p   |
| C17orf85 | hsa-miR-548o-5p  |
| C17orf85 | hsa-miR-1304-3p  |
| C17orf85 | hsa-miR-1207     |
| C17orf85 | hsa-let-7e-3p    |
| C17orf85 | hsa-miR-1625-3p  |
| C17orf85 | hsa-miR-6509-3p  |
| C17orf85 | hsa-miR-483-3p.2 |
| C17orf85 | hsa-miR-6730-5p  |
| C17orf85 | hsa-miR-3081-5p  |
| C17orf85 | hsa-miR-8089     |
| C17orf85 | hsa-miR-4489     |
| C17orf85 | hsa-miR-6862-3p  |
| C17orf85 | hsa-miR-5010-3p  |
| C17orf85 | hsa-miR-5192     |
| C17orf85 | hsa-miR-7658-3p  |
| C17orf85 | hsa-let-7d-3p    |
| C17orf85 | hsa-miR-3562     |
| C17orf85 | hsa-miR-669hk-3p |
| C17orf85 | hsa-miR-548az-5p |
| C17orf85 | hsa-miR-873-5p   |
| C17orf85 | hsa-miR-6900-5p  |
| C17orf85 | hsa-miR-7158-3p  |
| C17orf85 | hsa-miR-3714     |
| C17orf85 | hsa-miR-6403     |
| C17orf85 | hsa-miR-3958     |
| C17orf85 | hsa-miR-1238-3p  |
| C17orf85 | hsa-miR-769-5p   |
| C17orf85 | hsa-miR-1237-3p  |
| C17orf85 | hsa-miR-7641     |
| C17orf85 | hsa-miR-1301-3p  |
| C17orf85 | hsa-miR-4275     |
| C17orf85 | hsa-miR-4694-3p  |
| C17orf85 | hsa-miR-7080-5p  |
| C17orf85 | hsa-miR-6861-3p  |
| C17orf85 | hsa-miR-6856-5p  |
| C17orf85 | hsa-miR-550b-3p  |
| C17orf85 | hsa-miR-4661-3p  |
| C17orf85 | hsa-miR-4423-3p  |
| C17orf85 | hsa-miR-1966-3p  |
| C17orf85 | hsa-miR-155-5p   |
| C17orf85 | hsa-miR-7052-5p  |
| C17orf85 | hsa-miR-6995-3p  |
| C17orf85 | hsa-miR-1179     |
| C17orf85 | hsa-miR-6761-5p  |

|          |                  |
|----------|------------------|
| C17orf85 | hsa-miR-7057-5p  |
| C17orf85 | hsa-miR-7679-3p  |
| C17orf85 | hsa-miR-6331     |
| C17orf85 | hsa-miR-3653-3p  |
| C17orf85 | hsa-miR-600      |
| C17orf85 | hsa-miR-7221-5p  |
| C17orf85 | hsa-miR-2472     |
| C17orf85 | hsa-miR-619-5p   |
| C17orf85 | hsa-miR-411-5p.2 |
| C17orf85 | hsa-miR-1470     |
| C17orf85 | hsa-miR-7649-5p  |
| C17orf85 | hsa-miR-3551-5p  |
| C17orf85 | hsa-miR-7153-3p  |
| C17orf85 | hsa-miR-431-5p   |
| C17orf85 | hsa-miR-517      |
| C17orf85 | hsa-miR-1284     |
| C17orf85 | hsa-miR-4478     |
| C17orf85 | hsa-miR-2284v    |
| C17orf85 | hsa-miR-2447     |
| C17orf85 | hsa-miR-3156-5p  |
| C17orf85 | hsa-miR-7680-3p  |
| C17orf85 | hsa-miR-939-5p   |
| C17orf85 | hsa-miR-3589     |
| C17orf85 | hsa-miR-3109-3p  |
| C17orf85 | hsa-miR-2412     |
| C17orf85 | hsa-miR-4324     |
| C17orf85 | hsa-miR-449c-3p  |
| C17orf85 | hsa-miR-888-5p   |
| C17orf85 | hsa-miR-101-3p.1 |
| C17orf85 | hsa-miR-363-3p   |
| C17orf85 | hsa-miR-3674     |
| C17orf85 | hsa-miR-3075-3p  |
| C17orf85 | hsa-miR-8802     |
| C17orf85 | hsa-miR-7172-3p  |
| C17orf85 | hsa-miR-496-5p   |
| C17orf85 | hsa-miR-300-5p   |
| C17orf85 | hsa-miR-2890     |
| C17orf85 | hsa-miR-351-5p   |
| C17orf85 | hsa-miR-665      |
| C17orf85 | hsa-miR-548as-3p |
| C17orf85 | hsa-miR-3934-5p  |
| C17orf85 | hsa-miR-939-5p   |
| C17orf85 | hsa-miR-2478     |
| C17orf85 | hsa-miR-876-3p   |
| C17orf85 | hsa-miR-374-5p   |
| C17orf85 | hsa-miR-6640-5p  |

|          |                  |
|----------|------------------|
| C17orf85 | hsa-miR-2486-5p  |
| C17orf85 | hsa-miR-374c-5p  |
| C17orf85 | hsa-miR-4254     |
| C17orf85 | hsa-miR-6325     |
| C17orf85 | hsa-miR-1761     |
| C17orf85 | hsa-miR-6343     |
| C17orf85 | hsa-miR-7652-5p  |
| C17orf85 | hsa-miR-7176-5p  |
| C17orf85 | hsa-miR-1931     |
| C17orf85 | hsa-miR-1227-3p  |
| C17orf85 | hsa-miR-3103-3p  |
| C17orf85 | hsa-miR-7010-5p  |
| C17orf85 | hsa-miR-124-5p   |
| C17orf85 | hsa-miR-650abc   |
| C17orf85 | hsa-miR-7084-5p  |
| C17orf85 | hsa-miR-3106-3p  |
| C17orf85 | hsa-miR-874      |
| C17orf85 | hsa-miR-664      |
| C17orf85 | hsa-miR-1843     |
| C17orf85 | hsa-miR-7683-3p  |
| C17orf85 | hsa-miR-7859     |
| C17orf85 | hsa-miR-5694     |
| C17orf85 | hsa-miR-2343     |
| C17orf85 | hsa-miR-329-3p   |
| C17orf85 | hsa-miR-7311-5p  |
| C17orf85 | hsa-miR-4693-5p  |
| C17orf85 | hsa-miR-3544-5p  |
| C17orf85 | hsa-miR-548aq-5p |
| C17orf85 | hsa-miR-3670     |
| C17orf85 | hsa-miR-6771-3p  |
| C17orf85 | hsa-miR-7376-5p  |
| C17orf85 | hsa-miR-8826     |
| C17orf85 | hsa-miR-1936     |
| C17orf85 | hsa-miR-6523a    |
| C17orf85 | hsa-miR-548ah-3p |
| C17orf85 | hsa-miR-6506-5p  |
| C17orf85 | hsa-miR-508a     |
| C17orf85 | hsa-miR-505-3p   |
| C17orf85 | hsa-miR-3166     |
| C17orf85 | hsa-miR-1236-5p  |
| C17orf85 | hsa-miR-2329-3p  |
| C17orf85 | hsa-miR-548ae-5p |
| C17orf85 | hsa-miR-2898     |
| C17orf85 | hsa-miR-5623-5p  |
| C17orf85 | hsa-miR-650      |
| C17orf85 | hsa-miR-3475-3p  |

|          |                   |
|----------|-------------------|
| C17orf85 | hsa-miR-3976      |
| C17orf85 | hsa-miR-875-3p    |
| C17orf85 | hsa-miR-6932-3p   |
| C17orf85 | hsa-miR-203-3p    |
| C17orf85 | hsa-miR-298-3p    |
| C17orf85 | hsa-miR-503-5p    |
| C17orf85 | hsa-miR-5693      |
| C17orf85 | hsa-miR-218a-1-3p |
| C17orf85 | hsa-miR-6822-3p   |
| C17orf85 | hsa-miR-8900      |
| C17orf85 | hsa-miR-6898-5p   |
| C17orf85 | hsa-miR-6787-3p   |
| C17orf85 | hsa-miR-1245a     |
| C17orf85 | hsa-miR-203-3p.2  |
| C17orf85 | hsa-miR-4742      |
| C17orf85 | hsa-miR-223-5p    |
| C17orf85 | hsa-miR-501-3p    |
| C17orf85 | hsa-miR-20a-3p    |
| C17orf85 | hsa-miR-3064-3p   |
| C17orf85 | hsa-miR-502-3p    |
| C17orf85 | hsa-miR-4749-3p   |
| C17orf85 | hsa-miR-548az-3p  |
| C17orf85 | hsa-miR-6783-5p   |
| C17orf85 | hsa-miR-7092-5p   |
| C17orf85 | hsa-miR-1451-3p   |
| C17orf85 | hsa-miR-667-5p    |
| C17orf85 | hsa-miR-6918-5p   |
| C17orf85 | hsa-miR-143-5p    |
| C17orf85 | hsa-miR-3059-5p   |
| C17orf85 | hsa-miR-214-3p    |
| C17orf85 | hsa-miR-636       |
| C17orf85 | hsa-miR-1563      |
| C17orf85 | hsa-miR-1897-3p   |
| C17orf85 | hsa-miR-3078-3p   |
| C17orf85 | hsa-miR-6354      |
| C17orf85 | hsa-miR-2888      |
| C17orf85 | hsa-miR-7438-5p   |
| C17orf85 | hsa-miR-491-5p    |
| C17orf85 | hsa-miR-548l      |
| C17orf85 | hsa-miR-4653-5p   |
| C17orf85 | hsa-miR-335-5p    |
| C17orf85 | hsa-miR-152-3p    |
| C17orf85 | hsa-miR-376a-2-5p |
| C17orf85 | hsa-miR-1324      |
| C17orf85 | hsa-miR-1236-3p   |
| C17orf85 | hsa-miR-140-5p    |

|          |                  |
|----------|------------------|
| C17orf85 | hsa-miR-7650-5p  |
| C17orf85 | hsa-miR-6826-5p  |
| C17orf85 | hsa-miR-6318     |
| C17orf85 | hsa-miR-2366     |
| C17orf85 | hsa-miR-6747-5p  |
| C17orf85 | hsa-miR-450b-3p  |
| C17orf85 | hsa-miR-3578     |
| C17orf85 | hsa-miR-140-3p.2 |
| C17orf85 | hsa-miR-371      |
| C17orf85 | hsa-miR-1194     |
| C17orf85 | hsa-miR-743b-5p  |
| C17orf85 | hsa-miR-367-3p   |
| C17orf85 | hsa-miR-651-3p   |
| C17orf85 | hsa-miR-147a     |
| C17orf85 | hsa-miR-132-5p   |
| C17orf85 | hsa-miR-135a-3p  |
| C17orf85 | hsa-miR-2284y    |
| C17orf85 | hsa-miR-4667     |
| C17orf85 | hsa-miR-6773-5p  |
| C17orf85 | hsa-miR-1643-3p  |
| C17orf85 | hsa-miR-3076-3p  |
| C17orf85 | hsa-miR-25-3p    |
| C17orf85 | hsa-let-7d-5p    |
| C17orf85 | hsa-miR-6693-3p  |
| C17orf85 | hsa-miR-5121     |
| C17orf85 | hsa-miR-1241     |
| C17orf85 | hsa-miR-881-5p   |
| C17orf85 | hsa-miR-126-3p   |
| C17orf85 | hsa-miR-23       |
| C17orf85 | hsa-miR-6775-5p  |
| C17orf85 | hsa-miR-374c-3p  |
| C17orf85 | hsa-miR-1226-3p  |
| C17orf85 | hsa-miR-1611     |
| C17orf85 | hsa-miR-660-5p   |
| C17orf85 | hsa-miR-6922-3p  |
| C17orf85 | hsa-miR-6515-3p  |
| C17orf85 | hsa-miR-7220-3p  |
| C17orf85 | hsa-miR-2682-3p  |
| C17orf85 | hsa-miR-504-5p.1 |
| C17orf85 | hsa-miR-548ab    |
| C17orf85 | hsa-miR-4790-5p  |
| C17orf85 | hsa-miR-4434     |
| C17orf85 | hsa-miR-1307-3p  |
| C17orf85 | hsa-miR-7174-5p  |
| C17orf85 | hsa-miR-8792     |
| C17orf85 | hsa-miR-1224-3p  |



|          |                   |
|----------|-------------------|
| C17orf85 | hsa-miR-340-5p    |
| C17orf85 | hsa-miR-6852-5p   |
| C17orf85 | hsa-miR-6825-5p   |
| C17orf85 | hsa-miR-548e-5p   |
| C17orf85 | hsa-miR-376c-3p   |
| C17orf85 | hsa-miR-23c       |
| C17orf85 | hsa-miR-6328      |
| C17orf85 | hsa-miR-548q      |
| C17orf85 | hsa-miR-9-3p      |
| C17orf85 | hsa-miR-7165-5p   |
| C17orf85 | hsa-miR-33-3p     |
| C17orf85 | hsa-miR-4768-5p   |
| C17orf85 | hsa-miR-5586-5p   |
| C17orf85 | hsa-miR-4704-5p   |
| C17orf85 | hsa-miR-520c-3p   |
| C17orf85 | hsa-miR-7041-3p   |
| C17orf85 | hsa-miR-6961-3p   |
| C17orf85 | hsa-miR-703       |
| C17orf85 | hsa-miR-1178-3p   |
| C17orf85 | hsa-miR-361-5p    |
| C17orf85 | hsa-miR-4712-3p   |
| C17orf85 | hsa-miR-1938      |
| C17orf85 | hsa-miR-6726-3p   |
| C17orf85 | hsa-miR-433-5p    |
| C17orf85 | hsa-miR-8835      |
| C17orf85 | hsa-miR-6742-3p   |
| C17orf85 | hsa-miR-126a-5p   |
| C17orf85 | hsa-miR-1814      |
| C17orf85 | hsa-miR-8849      |
| C17orf85 | hsa-miR-1273h-3p  |
| C17orf85 | hsa-miR-105-5p    |
| C17orf85 | hsa-miR-92-3p     |
| C17orf85 | hsa-miR-6867-3p   |
| C17orf85 | hsa-miR-6945-3p   |
| C17orf85 | hsa-miR-5615-3p   |
| C17orf85 | hsa-miR-615-5p    |
| C17orf85 | hsa-miR-193b-5p   |
| C17orf85 | hsa-miR-466bcp-3p |
| C17orf85 | hsa-miR-186-5p    |
| C17orf85 | hsa-miR-545-3p    |
| C17orf85 | hsa-miR-4669      |
| C17orf85 | hsa-miR-4738-3p   |
| C17orf85 | hsa-miR-5187-3p   |
| C17orf85 | hsa-miR-7025-5p   |
| C17orf85 | hsa-miR-6847-3p   |
| C17orf85 | hsa-miR-146a-3p   |

|          |                 |
|----------|-----------------|
| C17orf85 | hsa-miR-4423    |
| C17orf85 | hsa-miR-200a-3p |
| C17orf85 | hsa-miR-6821-5p |
| C17orf85 | hsa-miR-6778-3p |
| C17orf85 | hsa-miR-193     |
| C17orf85 | hsa-miR-2385-5p |
| C17orf85 | hsa-miR-3163    |
| C17orf85 | hsa-miR-6881-5p |
| C17orf85 | hsa-miR-605-5p  |
| C17orf85 | hsa-miR-367-3p  |
| C17orf85 | hsa-miR-335-5p  |
| C17orf85 | hsa-miR-7164-5p |
| C17orf85 | hsa-miR-5087    |
| C17orf85 | hsa-miR-4789-3p |
| C17orf85 | hsa-miR-1260a   |
| C17orf85 | hsa-miR-7027-5p |
| C17orf85 | hsa-miR-6815-3p |
| C17orf85 | hsa-miR-140-5p  |
| C17orf85 | hsa-miR-30e-3p  |
| C17orf85 | hsa-miR-706     |
| C17orf85 | hsa-miR-3068-5p |
| C17orf85 | hsa-miR-340-5p  |
| C17orf85 | hsa-miR-6915-3p |
| C17orf85 | hsa-miR-1721    |
| C17orf85 | hsa-miR-16-2-3p |
| C17orf85 | hsa-miR-214-5p  |
| C17orf85 | hsa-miR-6859-5p |
| C17orf85 | hsa-miR-6991-5p |
| C17orf85 | hsa-miR-7843-5p |
| C17orf85 | hsa-miR-421     |
| C17orf85 | hsa-miR-8863    |
| C17orf85 | hsa-miR-7191-3p |
| C17orf85 | hsa-miR-6748-5p |
| C17orf85 | hsa-miR-770-5p  |
| C17orf85 | hsa-miR-338-5p  |
| C17orf85 | hsa-miR-6748-3p |
| C17orf85 | hsa-miR-676-5p  |
| C17orf85 | hsa-miR-567     |
| C17orf85 | hsa-miR-22-5p   |
| C17orf85 | hsa-miR-362-5p  |
| C17orf85 | hsa-miR-2416    |
| C17orf85 | hsa-miR-4721    |
| C17orf85 | hsa-miR-8861    |
| C17orf85 | hsa-miR-4657    |
| C17orf85 | hsa-miR-4779    |
| C17orf85 | hsa-miR-8872    |

|          |                  |
|----------|------------------|
| C17orf85 | hsa-miR-297bc-3p |
| C17orf85 | hsa-miR-1228-5p  |
| C17orf85 | hsa-miR-7001-3p  |
| C17orf85 | hsa-miR-191-3p   |
| C17orf85 | hsa-miR-765      |
| C17orf85 | hsa-miR-8108     |
| C17orf85 | hsa-miR-545-5p   |
| C17orf85 | hsa-miR-548ao-3p |
| C17orf85 | hsa-miR-3156-3p  |
| C17orf85 | hsa-miR-6905-5p  |
| C17orf85 | hsa-miR-136-5p   |
| C17orf85 | hsa-miR-6769a-3p |
| C17orf85 | hsa-miR-382-3p   |
| C17orf85 | hsa-miR-4481     |
| C17orf85 | hsa-miR-548bb-5p |
| C17orf85 | hsa-miR-4684-3p  |
| C17orf85 | hsa-miR-4699-5p  |
| C17orf85 | hsa-miR-8862     |
| C17orf85 | hsa-miR-424-3p   |
| C17orf85 | hsa-miR-6823-5p  |
| C17orf85 | hsa-miR-6925-3p  |
| C17orf85 | hsa-miR-517-3p   |
| C17orf85 | hsa-miR-1733     |
| C17orf85 | hsa-miR-501-5p   |
| C17orf85 | hsa-miR-3064     |
| C17orf85 | hsa-miR-743b-3p  |
| C17orf85 | hsa-miR-5691     |
| C17orf85 | hsa-miR-1288-5p  |
| C17orf85 | hsa-miR-7150     |
| C17orf85 | hsa-miR-6965-5p  |
| C17orf85 | hsa-miR-2309     |
| C17orf85 | hsa-miR-4668-3p  |
| C17orf85 | hsa-miR-3158-3p  |
| C17orf85 | hsa-miR-6784-3p  |
| C17orf85 | hsa-miR-6747-3p  |
| C17orf85 | hsa-miR-708-5p   |
| C17orf85 | hsa-miR-365-3p   |
| C17orf85 | hsa-miR-4747-5p  |
| C17orf85 | hsa-miR-7213-5p  |
| C17orf85 | hsa-miR-8855     |
| C17orf85 | hsa-miR-8067     |
| C17orf85 | hsa-miR-6873-3p  |
| C17orf85 | hsa-miR-320e     |
| C17orf85 | hsa-miR-1277-5p  |
| C17orf85 | hsa-miR-3101-5p  |
| C17orf85 | hsa-miR-7b-3p    |

|          |                  |
|----------|------------------|
| C17orf85 | hsa-miR-1-5p     |
| C17orf85 | hsa-miR-7973     |
| C17orf85 | hsa-miR-7046-5p  |
| C17orf85 | hsa-miR-7160-5p  |
| C17orf85 | hsa-miR-6791-5p  |
| C17orf85 | hsa-miR-198      |
| C17orf85 | hsa-miR-6584-5p  |
| C17orf85 | hsa-miR-6889-3p  |
| C17orf85 | hsa-miR-3151-5p  |
| C17orf85 | hsa-miR-4281     |
| C17orf85 | hsa-miR-350      |
| C17orf85 | hsa-miR-6165     |
| C17orf85 | hsa-miR-7086-5p  |
| C17orf85 | hsa-miR-1291     |
| C17orf85 | hsa-miR-106-3p   |
| C17orf85 | hsa-miR-3941     |
| C17orf85 | hsa-miR-181      |
| C17orf85 | hsa-miR-604      |
| C17orf85 | hsa-miR-8837     |
| C17orf85 | hsa-miR-548av-3p |
| C17orf85 | hsa-miR-3086-3p  |
| C17orf85 | hsa-miR-4307     |
| C17orf85 | hsa-miR-6982-5p  |
| C17orf85 | hsa-miR-767-5p   |
| C17orf85 | hsa-miR-4263     |
| C17orf85 | hsa-miR-7453-3p  |
| C17orf85 | hsa-miR-4486     |
| C17orf85 | hsa-miR-7200-5p  |
| C17orf85 | hsa-miR-4430     |
| C17orf85 | hsa-miR-331-5p   |
| C17orf85 | hsa-miR-4751     |
| C17orf85 | hsa-miR-498      |
| C17orf85 | hsa-miR-224-5p   |
| C17orf85 | hsa-miR-6804-3p  |
| C17orf85 | hsa-miR-296-3p   |
| C17orf85 | hsa-miR-4689     |
| C17orf85 | hsa-miR-8806     |
| C17orf85 | hsa-miR-4426     |
| C17orf85 | hsa-miR-3094-5p  |
| C17orf85 | hsa-miR-8097     |
| C17orf85 | hsa-miR-4524a-3p |
| C17orf85 | hsa-miR-6856-3p  |
| C17orf85 | hsa-miR-30b-3p   |
| C17orf85 | hsa-miR-3552     |
| C17orf85 | hsa-miR-2317     |
| C17orf85 | hsa-miR-7659-3p  |

|          |                  |
|----------|------------------|
| C17orf85 | hsa-miR-3671     |
| C17orf85 | hsa-miR-627-3p   |
| C17orf85 | hsa-miR-1948-3p  |
| C17orf85 | hsa-miR-1304-5p  |
| C17orf85 | hsa-miR-6684-5p  |
| C17orf85 | hsa-miR-98-5p    |
| C17orf85 | hsa-miR-211-3p   |
| C17orf85 | hsa-miR-107-3p   |
| C17orf85 | hsa-miR-4498     |
| C17orf85 | hsa-miR-4718     |
| C17orf85 | hsa-miR-6089     |
| C17orf85 | hsa-miR-4649-3p  |
| C17orf85 | hsa-miR-4502     |
| C17orf85 | hsa-miR-933      |
| C17orf85 | hsa-miR-743ab-3p |
| C17orf85 | hsa-miR-4663     |
| C17orf85 | hsa-miR-582-5p   |
| C17orf85 | hsa-miR-3915     |
| C17orf85 | hsa-miR-2388-5p  |
| C17orf85 | hsa-miR-3622a-5p |
| C17orf85 | hsa-miR-7231-3p  |
| C17orf85 | hsa-miR-5189-5p  |
| C17orf85 | hsa-miR-448-3p   |
| C17orf85 | hsa-miR-5133     |
| C17orf85 | hsa-miR-3588     |
| C17orf85 | hsa-miR-4723-3p  |
| C17orf85 | hsa-miR-2429     |
| C17orf85 | hsa-miR-2411-5p  |
| C17orf85 | hsa-miR-519      |
| C17orf85 | hsa-miR-1558     |
| C17orf85 | hsa-miR-6923-3p  |
| C17orf85 | hsa-miR-3583-3p  |
| C17orf85 | hsa-miR-7688-5p  |
| C17orf85 | hsa-let-7a-3p    |
| C17orf85 | hsa-miR-7043-3p  |
| C17orf85 | hsa-miR-6910-5p  |
| C17orf85 | hsa-miR-672-3p   |
| C17orf85 | hsa-miR-877-3p   |
| C17orf85 | hsa-miR-322-5p   |
| C17orf85 | hsa-miR-544b     |
| C17orf85 | hsa-miR-7847-3p  |
| C17orf85 | hsa-miR-547-5p   |
| C17orf85 | hsa-miR-126-5p   |
| C17orf85 | hsa-miR-186-3p   |
| C17orf85 | hsa-miR-125      |
| C17orf85 | hsa-miR-8100     |

|          |                  |
|----------|------------------|
| C17orf85 | hsa-miR-425      |
| C17orf85 | hsa-miR-6832-5p  |
| C17orf85 | hsa-miR-7-5p     |
| C17orf85 | hsa-miR-6605-5p  |
| C17orf85 | hsa-miR-3092-5p  |
| C17orf85 | hsa-miR-7039-5p  |
| C17orf85 | hsa-miR-6887-3p  |
| C17orf85 | hsa-miR-4734     |
| C17orf85 | hsa-miR-335-3p   |
| C17orf85 | hsa-miR-3068-3p  |
| C17orf85 | hsa-miR-524-5p   |
| C17orf85 | hsa-miR-4786-3p  |
| C17orf85 | hsa-miR-3569-3p  |
| C17orf85 | hsa-miR-466c-3p  |
| C17orf85 | hsa-miR-3530-3p  |
| C17orf85 | hsa-miR-4772-5p  |
| C17orf85 | hsa-miR-8836     |
| C17orf85 | hsa-miR-5119     |
| C17orf85 | hsa-miR-2296     |
| C17orf85 | hsa-miR-186-5p   |
| C17orf85 | hsa-miR-492      |
| C17orf85 | hsa-miR-661      |
| C17orf85 | hsa-miR-3685     |
| C17orf85 | hsa-miR-3927-3p  |
| C17orf85 | hsa-miR-27a-5p   |
| C17orf85 | hsa-miR-1910-5p  |
| C17orf85 | hsa-miR-4795-3p  |
| C17orf85 | hsa-miR-6829-5p  |
| C17orf85 | hsa-miR-200      |
| C17orf85 | hsa-miR-3130-5p  |
| C17orf85 | hsa-miR-3618-3p  |
| C17orf85 | hsa-miR-384-3p   |
| C17orf85 | hsa-miR-6378     |
| C17orf85 | hsa-miR-3672     |
| C17orf85 | hsa-miR-512-5p   |
| C17orf85 | hsa-miR-7074-5p  |
| C17orf85 | hsa-miR-7207-5p  |
| C17orf85 | hsa-miR-548b-3p  |
| C17orf85 | hsa-miR-2285i    |
| C17orf85 | hsa-miR-556-5p   |
| C17orf85 | hsa-miR-7166-5p  |
| C17orf85 | hsa-miR-1246     |
| C17orf85 | hsa-miR-7165-3p  |
| C17orf85 | hsa-miR-383-5p.1 |
| C17orf85 | hsa-miR-22-3p    |
| C17orf85 | hsa-miR-6508-5p  |

|          |                  |
|----------|------------------|
| C17orf85 | hsa-miR-3124-3p  |
| C17orf85 | hsa-miR-6641-3p  |
| C17orf85 | hsa-miR-6540-3p  |
| C17orf85 | hsa-miR-6890-3p  |
| C17orf85 | hsa-miR-4650-3p  |
| C17orf85 | hsa-miR-5584-5p  |
| C17orf85 | hsa-miR-3182     |
| C17orf85 | hsa-miR-7063-5p  |
| C17orf85 | hsa-miR-1731-3p  |
| C17orf85 | hsa-miR-574-3p   |
| C17orf85 | hsa-miR-8103     |
| C17orf85 | hsa-miR-686      |
| C17orf85 | hsa-miR-4292     |
| C17orf85 | hsa-miR-4720-3p  |
| C17orf85 | hsa-miR-7039-3p  |
| C17orf85 | hsa-miR-470-5p   |
| C17orf85 | hsa-miR-7679-5p  |
| C17orf85 | hsa-miR-4512     |
| C17orf85 | hsa-miR-504      |
| C17orf85 | hsa-miR-6857-5p  |
| C17orf85 | hsa-miR-218-5p   |
| C17orf85 | hsa-miR-3135b    |
| C17orf85 | hsa-miR-719      |
| C17orf85 | hsa-miR-7232-5p  |
| C17orf85 | hsa-miR-3073b-3p |
| C17orf85 | hsa-miR-497-5p   |
| C17orf85 | hsa-miR-2285     |
| C17orf85 | hsa-miR-382-5p   |
| C17orf85 | hsa-miR-2465     |
| C17orf85 | hsa-miR-7200-3p  |
| C17orf85 | hsa-miR-1199-5p  |
| C17orf85 | hsa-miR-4700-3p  |
| C17orf85 | hsa-miR-764      |
| C17orf85 | hsa-miR-1744-3p  |
| C17orf85 | hsa-miR-3152-3p  |
| C17orf85 | hsa-let-7abf-3p  |
| C17orf85 | hsa-miR-1929-5p  |
| C17orf85 | hsa-miR-4763-3p  |
| C17orf85 | hsa-miR-4735-5p  |
| C17orf85 | hsa-miR-7846-3p  |
| C17orf85 | hsa-miR-371a-5p  |
| C17orf85 | hsa-miR-6736-3p  |
| C17orf85 | hsa-miR-1198-3p  |
| C17orf85 | hsa-miR-548d-3p  |
| C17orf85 | hsa-miR-6957-5p  |
| C17orf85 | hsa-miR-548ao-5p |

|          |                   |
|----------|-------------------|
| C17orf85 | hsa-miR-32-3p     |
| C17orf85 | hsa-miR-376a-1-5p |
| C17orf85 | hsa-miR-4659a-3p  |
| C17orf85 | hsa-miR-15a-3p    |
| C17orf85 | hsa-miR-6517      |
| C17orf85 | hsa-miR-5187-5p   |
| C17orf85 | hsa-miR-1933-3p   |
| C17orf85 | hsa-miR-4677-5p   |
| C17orf85 | hsa-miR-6513-3p   |
| C17orf85 | hsa-let-7f-1-3p   |
| C17orf85 | hsa-miR-6084      |
| C17orf85 | hsa-miR-892b      |
| C17orf85 | hsa-miR-7006-5p   |
| C17orf85 | hsa-miR-4433a-3p  |
| C17orf85 | hsa-miR-704       |
| C17orf85 | hsa-miR-548d-5p   |
| C17orf85 | hsa-miR-16-3p     |
| C17orf85 | hsa-miR-1245b-3p  |
| C17orf85 | hsa-miR-6508-3p   |
| C17orf85 | hsa-miR-4674      |
| C17orf85 | hsa-miR-770-3p    |
| C17orf85 | hsa-miR-513c-5p   |
| C17orf85 | hsa-miR-145-5p    |
| C17orf85 | hsa-miR-6514-3p   |
| C17orf85 | hsa-miR-2370-5p   |
| C17orf85 | hsa-miR-587       |
| C17orf85 | hsa-miR-4710      |
| C17orf85 | hsa-miR-101b-3p.2 |
| C17orf85 | hsa-miR-4670-3p   |
| C17orf85 | hsa-miR-106a-3p   |
| C17orf85 | hsa-miR-7456-5p   |
| C17orf85 | hsa-miR-25-3p     |
| C17orf85 | hsa-miR-18        |
| C17orf85 | hsa-miR-6722-3p   |
| C17orf85 | hsa-miR-485-3p    |
| C17orf85 | hsa-miR-379-3p    |
| C17orf85 | hsa-miR-224-3p    |
| C17orf85 | hsa-miR-6793-5p   |
| C17orf85 | hsa-miR-6511-3p   |
| C17orf85 | hsa-miR-548i-5p   |
| C17orf85 | hsa-miR-7482-3p   |
| C17orf85 | hsa-miR-301       |
| C17orf85 | hsa-miR-6546-5p   |
| C17orf85 | hsa-miR-203a-5p   |
| C17orf85 | hsa-miR-133cd-5p  |
| C17orf85 | hsa-miR-7118-3p   |



|          |                   |
|----------|-------------------|
| C17orf85 | hsa-miR-4766-5p   |
| C17orf85 | hsa-miR-7114-5p   |
| C17orf85 | hsa-miR-4421      |
| C17orf85 | hsa-miR-6720-3p   |
| C17orf85 | hsa-miR-670-5p    |
| C17orf85 | hsa-miR-4444      |
| C17orf85 | hsa-miR-4662a-3p  |
| C17orf85 | hsa-miR-2284i     |
| C17orf85 | hsa-miR-5008-5p   |
| C17orf85 | hsa-miR-499       |
| C17orf85 | hsa-miR-520g-3p   |
| C17orf85 | hsa-miR-2483      |
| C17orf85 | hsa-miR-1304-5p   |
| C17orf85 | hsa-miR-4726-3p   |
| C17orf85 | hsa-miR-466q      |
| C17orf85 | hsa-miR-3190-3p   |
| C17orf85 | hsa-miR-4666a-3p  |
| C17orf85 | hsa-miR-664-5p    |
| C17orf85 | hsa-miR-1b-5p     |
| C17orf85 | hsa-miR-5112      |
| C17orf85 | hsa-miR-1838      |
| C17orf85 | hsa-miR-6804-5p   |
| C17orf85 | hsa-miR-484       |
| C17orf85 | hsa-miR-8064      |
| C17orf85 | hsa-miR-4803      |
| C17orf85 | hsa-miR-4671-5p   |
| C17orf85 | hsa-miR-1200      |
| C17orf85 | hsa-miR-203-3p.1  |
| C17orf85 | hsa-miR-191-5p    |
| C17orf85 | hsa-miR-199a-5p   |
| C17orf85 | hsa-miR-7190-3p   |
| C17orf85 | hsa-miR-4452      |
| C17orf85 | hsa-miR-466ade-3p |
| C17orf85 | hsa-miR-873-3p    |
| C17orf85 | hsa-miR-3199      |
| C17orf85 | hsa-miR-1255-5p   |
| C17orf85 | hsa-miR-2284z     |
| C17orf85 | hsa-miR-548a-5p   |
| C17orf85 | hsa-miR-539-5p    |
| C17orf85 | hsa-miR-508-5p    |
| C17orf85 | hsa-miR-4662b     |
| C17orf85 | hsa-miR-134-3p    |
| C17orf85 | hsa-miR-6945-5p   |
| C17orf85 | hsa-miR-323a-5p   |
| C17orf85 | hsa-miR-940       |
| C17orf85 | hsa-miR-192-5p    |

|          |                   |
|----------|-------------------|
| C17orf85 | hsa-miR-490-3p    |
| C17orf85 | hsa-miR-2389      |
| C17orf85 | hsa-miR-2461-3p   |
| C17orf85 | hsa-miR-3191-3p   |
| C17orf85 | hsa-miR-7170-5p   |
| C17orf85 | hsa-miR-465-5p    |
| C17orf85 | hsa-miR-6808-3p   |
| C17orf85 | hsa-miR-302       |
| C17orf85 | hsa-miR-200bc-3p  |
| C17orf85 | hsa-let-7e-5p     |
| C17orf85 | hsa-miR-667-3p    |
| C17orf85 | hsa-miR-22-3p     |
| C17orf85 | hsa-miR-3074-3p   |
| C17orf85 | hsa-miR-5094      |
| C17orf85 | hsa-miR-450a-2-3p |
| C17orf85 | hsa-miR-1185-5p   |
| C17orf85 | hsa-miR-6127      |
| C17orf85 | hsa-miR-129-3p    |
| C17orf85 | hsa-miR-129-2-3p  |
| C17orf85 | hsa-miR-4267      |
| C17orf85 | hsa-miR-3075-5p   |
| C17orf85 | hsa-miR-603       |
| C17orf85 | hsa-miR-4740-5p   |
| C17orf85 | hsa-miR-138-2-3p  |
| C17orf85 | hsa-miR-760-5p    |
| C17orf85 | hsa-miR-1657      |
| C17orf85 | hsa-miR-635       |
| C17orf85 | hsa-miR-217-5p    |
| C17orf85 | hsa-miR-590-5p    |
| C17orf85 | hsa-miR-7192-5p   |
| C17orf85 | hsa-miR-7674-5p   |
| C17orf85 | hsa-miR-561-3p    |
| C17orf85 | hsa-miR-652-5p    |
| C17orf85 | hsa-miR-4641      |
| C17orf85 | hsa-miR-194-3p    |
| C17orf85 | hsa-miR-6943-5p   |
| C17orf85 | hsa-miR-7049-5p   |
| C17orf85 | hsa-miR-677-3p    |
| C17orf85 | hsa-miR-655-3p    |
| C17orf85 | hsa-miR-4322      |
| C17orf85 | hsa-miR-3154      |
| C17orf85 | hsa-miR-3155a     |
| C17orf85 | hsa-miR-5125-5p   |
| C17orf85 | hsa-miR-6716-5p   |
| C17orf85 | hsa-miR-326-5p    |
| C17orf85 | hsa-miR-545-3p    |

|          |                  |
|----------|------------------|
| C17orf85 | hsa-miR-149-5p   |
| C17orf85 | hsa-miR-7652-3p  |
| C17orf85 | hsa-miR-487a     |
| C17orf85 | hsa-miR-6811-3p  |
| C17orf85 | hsa-miR-6776-3p  |
| C17orf85 | hsa-miR-7113-3p  |
| C17orf85 | hsa-miR-6810-5p  |
| C17orf85 | hsa-miR-1930-5p  |
| C17orf85 | hsa-miR-7664-3p  |
| C17orf85 | hsa-miR-769      |
| C17orf85 | hsa-miR-7034-5p  |
| C17orf85 | hsa-miR-934      |
| C17orf85 | hsa-miR-7237-3p  |
| C17orf85 | hsa-miR-6526     |
| C17orf85 | hsa-miR-34bc-3p  |
| C17orf85 | hsa-miR-467f     |
| C17orf85 | hsa-miR-1199-3p  |
| C17orf85 | hsa-miR-3665     |
| C17orf85 | hsa-miR-4708-5p  |
| C17orf85 | hsa-miR-4443     |
| C17orf85 | hsa-miR-2117     |
| C17orf85 | hsa-miR-6940-5p  |
| C17orf85 | hsa-miR-6851-5p  |
| C17orf85 | hsa-miR-291-3p   |
| C17orf85 | hsa-miR-7115-3p  |
| C17orf85 | hsa-miR-6500-3p  |
| C17orf85 | hsa-miR-7230-3p  |
| C17orf85 | hsa-miR-8848     |
| C17orf85 | hsa-miR-6958-3p  |
| C17orf85 | hsa-miR-557      |
| C17orf85 | hsa-miR-6504-3p  |
| C17orf85 | hsa-miR-4495     |
| C17orf85 | hsa-miR-3113-5p  |
| C17orf85 | hsa-miR-466n-3p  |
| C17orf85 | hsa-miR-548t-5p  |
| C17orf85 | hsa-miR-361-3p   |
| C17orf85 | hsa-miR-8846     |
| C17orf85 | hsa-miR-384      |
| C17orf85 | hsa-miR-4675     |
| C17orf85 | hsa-miR-7678-3p  |
| C17orf85 | hsa-miR-323b-3p  |
| C17orf85 | hsa-miR-3593-3p  |
| C17orf85 | hsa-miR-548av-5p |
| C17orf85 | hsa-miR-223-3p   |
| C17orf85 | hsa-miR-2900     |
| C17orf85 | hsa-miR-6894-5p  |

|          |                  |
|----------|------------------|
| C17orf85 | hsa-miR-6616-5p  |
| C17orf85 | hsa-miR-634      |
| C17orf85 | hsa-miR-30c-3p   |
| C17orf85 | hsa-miR-6396     |
| C17orf85 | hsa-miR-7011-5p  |
| C17orf85 | hsa-miR-517a-3p  |
| C17orf85 | hsa-miR-7-3p     |
| C17orf85 | hsa-miR-6964-5p  |
| C17orf85 | hsa-miR-500a-3p  |
| C17orf85 | hsa-miR-503-5p   |
| C17orf85 | hsa-miR-6788-5p  |
| C17orf85 | hsa-miR-548ay-5p |
| C17orf85 | hsa-miR-106b-3p  |
| C17orf85 | hsa-miR-2382-3p  |
| C17orf85 | hsa-miR-383-3p   |
| C17orf85 | hsa-miR-4677-3p  |
| C17orf85 | hsa-miR-3587     |
| C17orf85 | hsa-miR-2378     |
| C17orf85 | hsa-miR-1288-3p  |
| C17orf85 | hsa-miR-140-3p.1 |
| C17orf85 | hsa-miR-4725-3p  |
| C17orf85 | hsa-miR-9a-3p    |
| C17orf85 | hsa-miR-2285aa   |
| C17orf85 | hsa-miR-7204-5p  |
| C17orf85 | hsa-miR-2418     |
| C17orf85 | hsa-miR-4668-5p  |
| C17orf85 | hsa-miR-1260a    |
| C17orf85 | hsa-miR-196b-3p  |
| C17orf85 | hsa-miR-101-1-5p |
| C17orf85 | hsa-miR-5681a    |
| C17orf85 | hsa-miR-7314-3p  |
| C17orf85 | hsa-miR-6913-5p  |
| C17orf85 | hsa-miR-3691-5p  |
| C17orf85 | hsa-miR-4761-3p  |
| C17orf85 | hsa-miR-874-3p   |
| C17orf85 | hsa-miR-3651     |
| C17orf85 | hsa-miR-3689-3p  |
| C17orf85 | hsa-miR-8883     |
| C17orf85 | hsa-miR-216-5p   |
| C17orf85 | hsa-miR-3150a-3p |
| C17orf85 | hsa-miR-642-3p   |
| C17orf85 | hsa-miR-6895-5p  |
| C17orf85 | hsa-miR-7203-5p  |
| C17orf85 | hsa-miR-4760-5p  |
| C17orf85 | hsa-miR-429-5p   |
| C17orf85 | hsa-miR-2450a    |

|          |                   |
|----------|-------------------|
| C17orf85 | hsa-miR-3575      |
| C17orf85 | hsa-miR-7673-3p   |
| C17orf85 | hsa-miR-3606-3p   |
| C17orf85 | hsa-miR-320a      |
| C17orf85 | hsa-miR-563       |
| C17orf85 | hsa-miR-9-5p      |
| CYFIP1   | hsa-miR-7220-5p   |
| CYFIP1   | hsa-miR-4314      |
| CYFIP1   | hsa-miR-3106-3p   |
| CYFIP1   | hsa-miR-216-5p    |
| CYFIP1   | hsa-miR-1b-5p     |
| CYFIP1   | hsa-miR-466aep-5p |
| CYFIP1   | hsa-miR-4646-5p   |
| CYFIP1   | hsa-miR-6819-3p   |
| CYFIP1   | hsa-miR-548ag     |
| CYFIP1   | hsa-miR-6780a-3p  |
| CYFIP1   | hsa-miR-763       |
| CYFIP1   | hsa-miR-509-3p    |
| CYFIP1   | hsa-miR-3688-3p   |
| CYFIP1   | hsa-miR-1252-3p   |
| CYFIP1   | hsa-miR-8836      |
| CYFIP1   | hsa-miR-615-3p    |
| CYFIP1   | hsa-miR-4777-5p   |
| CYFIP1   | hsa-miR-3173-3p   |
| CYFIP1   | hsa-miR-494-3p    |
| CYFIP1   | hsa-miR-496.2     |
| CYFIP1   | hsa-miR-4803      |
| CYFIP1   | hsa-miR-7168-5p   |
| CYFIP1   | hsa-miR-1262-3p   |
| CYFIP1   | hsa-miR-378       |
| CYFIP1   | hsa-miR-1266-3p   |
| CYFIP1   | hsa-miR-6909-3p   |
| CYFIP1   | hsa-miR-7180-3p   |
| CYFIP1   | hsa-miR-6982-5p   |
| CYFIP1   | hsa-miR-412       |
| CYFIP1   | hsa-miR-1278      |
| CYFIP1   | hsa-miR-7192-5p   |
| CYFIP1   | hsa-miR-4255      |
| CYFIP1   | hsa-miR-683       |
| CYFIP1   | hsa-miR-6994-5p   |
| CYFIP1   | hsa-miR-4799-5p   |
| CYFIP1   | hsa-miR-4263      |
| CYFIP1   | hsa-miR-3137      |
| CYFIP1   | hsa-miR-1915-3p   |
| CYFIP1   | hsa-miR-4796-3p   |
| CYFIP1   | hsa-miR-7231-3p   |

|        |                  |
|--------|------------------|
| CYFIP1 | hsa-miR-3136-5p  |
| CYFIP1 | hsa-miR-742-5p   |
| CYFIP1 | hsa-miR-93-5p    |
| CYFIP1 | hsa-miR-943      |
| CYFIP1 | hsa-miR-877-5p   |
| CYFIP1 | hsa-miR-3159     |
| CYFIP1 | hsa-miR-135      |
| CYFIP1 | hsa-miR-216a-5p  |
| CYFIP1 | hsa-miR-6730-3p  |
| CYFIP1 | hsa-miR-499b-3p  |
| CYFIP1 | hsa-miR-486-3p   |
| CYFIP1 | hsa-miR-7338-3p  |
| CYFIP1 | hsa-miR-6504-3p  |
| CYFIP1 | hsa-miR-6348     |
| CYFIP1 | hsa-miR-27-3p    |
| CYFIP1 | hsa-miR-5101     |
| CYFIP1 | hsa-miR-6970-5p  |
| CYFIP1 | hsa-miR-877-3p   |
| CYFIP1 | hsa-miR-449-5p   |
| CYFIP1 | hsa-miR-1388-3p  |
| CYFIP1 | hsa-miR-129-5p   |
| CYFIP1 | hsa-miR-511      |
| CYFIP1 | hsa-miR-548t-5p  |
| CYFIP1 | hsa-miR-128-3p   |
| CYFIP1 | hsa-miR-2325     |
| CYFIP1 | hsa-miR-766-3p   |
| CYFIP1 | hsa-miR-619-5p   |
| CYFIP1 | hsa-miR-138-5p   |
| CYFIP1 | hsa-miR-2367-3p  |
| CYFIP1 | hsa-miR-4732-3p  |
| CYFIP1 | hsa-miR-2311     |
| CYFIP1 | hsa-miR-631      |
| CYFIP1 | hsa-miR-3128     |
| CYFIP1 | hsa-miR-107-5p   |
| CYFIP1 | hsa-miR-7678-3p  |
| CYFIP1 | hsa-miR-154-5p   |
| CYFIP1 | hsa-miR-23-3p    |
| CYFIP1 | hsa-miR-604      |
| CYFIP1 | hsa-miR-206-3p   |
| CYFIP1 | hsa-miR-8118     |
| CYFIP1 | hsa-miR-5119     |
| CYFIP1 | hsa-miR-138-2-3p |
| CYFIP1 | hsa-miR-7330-3p  |
| CYFIP1 | hsa-miR-7015-3p  |
| CYFIP1 | hsa-miR-6810-3p  |
| CYFIP1 | hsa-miR-542-5p   |

|        |                    |
|--------|--------------------|
| CYFIP1 | hsa-miR-22-3p      |
| CYFIP1 | hsa-miR-340-3p     |
| CYFIP1 | hsa-miR-4758-5p    |
| CYFIP1 | hsa-miR-192-5p     |
| CYFIP1 | hsa-miR-290b-5p    |
| CYFIP1 | hsa-miR-466        |
| CYFIP1 | hsa-miR-4719       |
| CYFIP1 | hsa-miR-8056       |
| CYFIP1 | hsa-miR-7388a-3p   |
| CYFIP1 | hsa-miR-6506-5p    |
| CYFIP1 | hsa-miR-7218-3p    |
| CYFIP1 | hsa-miR-3692-3p    |
| CYFIP1 | hsa-miR-21-5p      |
| CYFIP1 | hsa-miR-92-3p      |
| CYFIP1 | hsa-miR-7087-5p    |
| CYFIP1 | hsa-miR-4765       |
| CYFIP1 | hsa-miR-126-5p     |
| CYFIP1 | hsa-miR-4460       |
| CYFIP1 | hsa-miR-410-5p     |
| CYFIP1 | hsa-miR-2284       |
| CYFIP1 | hsa-miR-6722-3p    |
| CYFIP1 | hsa-miR-543        |
| CYFIP1 | hsa-miR-6858-5p    |
| CYFIP1 | hsa-miR-642-3p     |
| CYFIP1 | hsa-miR-885-3p     |
| CYFIP1 | hsa-miR-607        |
| CYFIP1 | hsa-miR-1250-5p    |
| CYFIP1 | hsa-miR-708-5p     |
| CYFIP1 | hsa-miR-548aef     |
| CYFIP1 | hsa-miR-2284k      |
| CYFIP1 | hsa-miR-297-5p     |
| CYFIP1 | hsa-miR-4632-5p    |
| CYFIP1 | hsa-miR-767-3p     |
| CYFIP1 | hsa-let-7g-3p      |
| CYFIP1 | hsa-miR-585-5p     |
| CYFIP1 | hsa-miR-451a       |
| CYFIP1 | hsa-miR-29c-5p     |
| CYFIP1 | hsa-miR-548m       |
| CYFIP1 | hsa-miR-760        |
| CYFIP1 | hsa-miR-589-5p     |
| CYFIP1 | hsa-miR-6871-5p    |
| CYFIP1 | hsa-miR-7172-5p    |
| CYFIP1 | hsa-miR-376a-2-5p  |
| CYFIP1 | hsa-miR-4793-5p    |
| CYFIP1 | hsa-miR-4536-3p    |
| CYFIP1 | hsa-miR-669aflp-5p |

|        |                  |
|--------|------------------|
| CYFIP1 | hsa-miR-5589-5p  |
| CYFIP1 | hsa-miR-6856-5p  |
| CYFIP1 | hsa-miR-6777-3p  |
| CYFIP1 | hsa-miR-8837     |
| CYFIP1 | hsa-miR-6358     |
| CYFIP1 | hsa-miR-6526     |
| CYFIP1 | hsa-miR-497-5p   |
| CYFIP1 | hsa-let-7a-2-3p  |
| CYFIP1 | hsa-miR-186-5p   |
| CYFIP1 | hsa-miR-8074     |
| CYFIP1 | hsa-miR-499      |
| CYFIP1 | hsa-miR-4708-5p  |
| CYFIP1 | hsa-miR-1744-3p  |
| CYFIP1 | hsa-miR-21-5p    |
| CYFIP1 | hsa-miR-1668     |
| CYFIP1 | hsa-miR-7843-5p  |
| CYFIP1 | hsa-miR-197-3p   |
| CYFIP1 | hsa-miR-3540     |
| CYFIP1 | hsa-miR-2455     |
| CYFIP1 | hsa-miR-450b     |
| CYFIP1 | hsa-miR-103-3p   |
| CYFIP1 | hsa-miR-6841-3p  |
| CYFIP1 | hsa-miR-6945-3p  |
| CYFIP1 | hsa-miR-7196-5p  |
| CYFIP1 | hsa-miR-499a-3p  |
| CYFIP1 | hsa-miR-7194-5p  |
| CYFIP1 | hsa-miR-3577     |
| CYFIP1 | hsa-miR-5690     |
| CYFIP1 | hsa-miR-470-5p   |
| CYFIP1 | hsa-miR-409-3p   |
| CYFIP1 | hsa-miR-8084     |
| CYFIP1 | hsa-miR-30a-3p   |
| CYFIP1 | hsa-miR-26-3p    |
| CYFIP1 | hsa-miR-320a     |
| CYFIP1 | hsa-miR-409-5p   |
| CYFIP1 | hsa-miR-300      |
| CYFIP1 | hsa-miR-2301     |
| CYFIP1 | hsa-miR-7287-3p  |
| CYFIP1 | hsa-miR-524-5p   |
| CYFIP1 | hsa-miR-2489     |
| CYFIP1 | hsa-miR-302a-5p  |
| CYFIP1 | hsa-miR-7371b-3p |
| CYFIP1 | hsa-let-7f-2-3p  |
| CYFIP1 | hsa-miR-7244-5p  |
| CYFIP1 | hsa-miR-6577-3p  |
| CYFIP1 | hsa-miR-507      |



|        |                   |
|--------|-------------------|
| CYFIP1 | hsa-miR-5591-3p   |
| CYFIP1 | hsa-miR-2446      |
| CYFIP1 | hsa-miR-523-3p    |
| CYFIP1 | hsa-miR-3176      |
| CYFIP1 | hsa-miR-563       |
| CYFIP1 | hsa-miR-6869-5p   |
| CYFIP1 | hsa-miR-183-5p    |
| CYFIP1 | hsa-miR-519       |
| CYFIP1 | hsa-miR-8068      |
| CYFIP1 | hsa-miR-384-3p    |
| CYFIP1 | hsa-miR-2401      |
| CYFIP1 | hsa-miR-6132      |
| CYFIP1 | hsa-miR-185-5p    |
| CYFIP1 | hsa-miR-539-3p    |
| CYFIP1 | hsa-miR-1276      |
| CYFIP1 | hsa-miR-208a-5p   |
| CYFIP1 | hsa-miR-5681b     |
| CYFIP1 | hsa-miR-16-5p     |
| CYFIP1 | hsa-miR-669j      |
| CYFIP1 | hsa-miR-7258-5p   |
| CYFIP1 | hsa-miR-2183      |
| CYFIP1 | hsa-miR-323-3p    |
| CYFIP1 | hsa-miR-8061      |
| CYFIP1 | hsa-miR-7688-3p   |
| CYFIP1 | hsa-miR-8070      |
| CYFIP1 | hsa-miR-518d-5p   |
| CYFIP1 | hsa-miR-101-3p    |
| CYFIP1 | hsa-miR-9500      |
| CYFIP1 | hsa-miR-1781-5p   |
| CYFIP1 | hsa-miR-7236-3p   |
| CYFIP1 | hsa-miR-1206      |
| CYFIP1 | hsa-miR-548ar-3p  |
| CYFIP1 | hsa-miR-3575      |
| CYFIP1 | hsa-miR-1260a     |
| CYFIP1 | hsa-miR-193-3p    |
| CYFIP1 | hsa-miR-199b-2-5p |
| CYFIP1 | hsa-miR-6943-5p   |
| CYFIP1 | hsa-miR-493-3p    |
| CYFIP1 | hsa-miR-3064-3p   |
| CYFIP1 | hsa-miR-378c      |
| CYFIP1 | hsa-miR-1769-3p   |
| CYFIP1 | hsa-miR-2284aa    |
| CYFIP1 | hsa-miR-548c-3p   |
| CYFIP1 | hsa-miR-329-3p    |
| CYFIP1 | hsa-miR-182-5p    |
| CYFIP1 | hsa-miR-134       |

|        |                  |
|--------|------------------|
| CYFIP1 | hsa-miR-940      |
| CYFIP1 | hsa-miR-4783-3p  |
| CYFIP1 | hsa-miR-133a-5p  |
| CYFIP1 | hsa-miR-516b-3p  |
| CYFIP1 | hsa-miR-210      |
| CYFIP1 | hsa-miR-8885     |
| CYFIP1 | hsa-miR-2320-5p  |
| CYFIP1 | hsa-miR-6925-3p  |
| CYFIP1 | hsa-miR-208-5p   |
| CYFIP1 | hsa-miR-6508-5p  |
| CYFIP1 | hsa-miR-4512     |
| CYFIP1 | hsa-miR-1251-3p  |
| CYFIP1 | hsa-miR-331-3p   |
| CYFIP1 | hsa-miR-144-3p   |
| CYFIP1 | hsa-miR-619      |
| CYFIP1 | hsa-miR-1397-5p  |
| CYFIP1 | hsa-miR-96-5p    |
| CYFIP1 | hsa-miR-743ab-3p |
| CYFIP1 | hsa-miR-302b-5p  |
| CYFIP1 | hsa-miR-653-5p   |
| CYFIP1 | hsa-miR-206      |
| CYFIP1 | hsa-miR-6752-3p  |
| CYFIP1 | hsa-miR-7257-5p  |
| CYFIP1 | hsa-miR-7171-5p  |
| CYFIP1 | hsa-let-7e-3p    |
| CYFIP1 | hsa-miR-519e-5p  |
| CYFIP1 | hsa-miR-4502     |
| CYFIP1 | hsa-miR-26a-3p   |
| CYFIP1 | hsa-miR-3604     |
| CYFIP1 | hsa-miR-6778-3p  |
| CYFIP1 | hsa-miR-676-5p   |
| CYFIP1 | hsa-miR-410-3p   |
| CYFIP1 | hsa-miR-5098     |
| CYFIP1 | hsa-miR-2284-5p  |
| CYFIP1 | hsa-miR-7207-5p  |
| CYFIP1 | hsa-miR-6801-3p  |
| CYFIP1 | hsa-miR-670-5p   |
| CYFIP1 | hsa-miR-369-3p   |
| CYFIP1 | hsa-miR-222-5p   |
| CYFIP1 | hsa-miR-4518     |
| CYFIP1 | hsa-miR-499b-3p  |
| CYFIP1 | hsa-miR-6724-5p  |
| CYFIP1 | hsa-miR-1-2-5p   |
| CYFIP1 | hsa-miR-707      |
| CYFIP1 | hsa-miR-507b     |
| CYFIP1 | hsa-miR-128      |

|        |                   |
|--------|-------------------|
| CYFIP1 | hsa-miR-15c-3p    |
| CYFIP1 | hsa-miR-2480      |
| CYFIP1 | hsa-miR-205-5p    |
| CYFIP1 | hsa-miR-6773-5p   |
| CYFIP1 | hsa-miR-28-5p     |
| CYFIP1 | hsa-miR-126a-5p   |
| CYFIP1 | hsa-miR-34        |
| CYFIP1 | hsa-miR-669bf-3p  |
| CYFIP1 | hsa-miR-409       |
| CYFIP1 | hsa-miR-8819      |
| CYFIP1 | hsa-miR-374-5p    |
| CYFIP1 | hsa-miR-365-3p    |
| CYFIP1 | hsa-miR-1238-5p   |
| CYFIP1 | hsa-miR-4778-5p   |
| CYFIP1 | hsa-miR-548f-3p   |
| CYFIP1 | hsa-miR-1298      |
| CYFIP1 | hsa-miR-3529-5p   |
| CYFIP1 | hsa-miR-1233-3p   |
| CYFIP1 | hsa-miR-875       |
| CYFIP1 | hsa-miR-133cd-5p  |
| CYFIP1 | hsa-miR-204-3p    |
| CYFIP1 | hsa-miR-6894-3p   |
| CYFIP1 | hsa-miR-9-3p      |
| CYFIP1 | hsa-miR-4310      |
| CYFIP1 | hsa-miR-5619-5p   |
| CYFIP1 | hsa-miR-4653-5p   |
| CYFIP1 | hsa-miR-361-3p    |
| CYFIP1 | hsa-miR-1304-3p   |
| CYFIP1 | hsa-miR-6758-5p   |
| CYFIP1 | hsa-miR-130-3p    |
| CYFIP1 | hsa-miR-4501      |
| CYFIP1 | hsa-miR-660-3p    |
| CYFIP1 | hsa-miR-5186      |
| CYFIP1 | hsa-miR-2861      |
| CYFIP1 | hsa-miR-101b-3p.1 |
| CYFIP1 | hsa-miR-6927-3p   |
| CYFIP1 | hsa-miR-2393      |
| CYFIP1 | hsa-miR-743-5p    |
| CYFIP1 | hsa-miR-6848-3p   |
| CYFIP1 | hsa-miR-7162-5p   |
| CYFIP1 | hsa-miR-669c-5p   |
| CYFIP1 | hsa-miR-1294      |
| CYFIP1 | hsa-miR-4763-5p   |
| CYFIP1 | hsa-miR-143-3p    |
| CYFIP1 | hsa-miR-4439      |
| CYFIP1 | hsa-miR-6871-3p   |

|        |                 |
|--------|-----------------|
| CYFIP1 | hsa-miR-3184-3p |
| CYFIP1 | hsa-miR-6729-3p |
| CYFIP1 | hsa-miR-4474-5p |
| CYFIP1 | hsa-miR-3143    |
| CYFIP1 | hsa-miR-6874-5p |
| CYFIP1 | hsa-miR-1207-3p |
| CYFIP1 | hsa-miR-1582    |
| CYFIP1 | hsa-miR-101-5p  |
| CYFIP1 | hsa-miR-6814-5p |
| CYFIP1 | hsa-miR-2310    |
| CYFIP1 | hsa-miR-7241-3p |
| CYFIP1 | hsa-miR-582-5p  |
| CYFIP1 | hsa-miR-649     |
| CYFIP1 | hsa-miR-1298-5p |
| CYFIP1 | hsa-miR-7286-3p |
| CYFIP1 | hsa-miR-101-3p  |
| CYFIP1 | hsa-miR-3600    |
| CYFIP1 | hsa-miR-4287    |
| CYFIP1 | hsa-miR-2337    |
| CYFIP1 | hsa-miR-202-5p  |
| CYFIP1 | hsa-miR-4792    |
| CYFIP1 | hsa-miR-495-3p  |
| CYFIP1 | hsa-miR-579-3p  |
| CYFIP1 | hsa-miR-4755-3p |
| CYFIP1 | hsa-miR-3689d   |
| CYFIP1 | hsa-miR-547-5p  |
| CYFIP1 | hsa-miR-664-3p  |
| CYFIP1 | hsa-miR-7333-3p |
| CYFIP1 | hsa-miR-3532-5p |
| CYFIP1 | hsa-miR-494     |
| CYFIP1 | hsa-miR-24-3p   |
| CYFIP1 | hsa-miR-4495    |
| CYFIP1 | hsa-miR-6790-5p |
| CYFIP1 | hsa-miR-376a-5p |
| CYFIP1 | hsa-let-7c-3p   |
| CYFIP1 | hsa-miR-2473    |
| CYFIP1 | hsa-miR-497-5p  |
| CYFIP1 | hsa-miR-490-5p  |
| CYFIP1 | hsa-miR-7673-3p |
| CYFIP1 | hsa-let-7abf-3p |
| CYFIP1 | hsa-miR-143-5p  |
| CYFIP1 | hsa-miR-513a-3p |
| CYFIP1 | hsa-miR-7156-3p |
| CYFIP1 | hsa-miR-2285b   |
| CYFIP1 | hsa-miR-8825    |
| CYFIP1 | hsa-miR-6779-3p |

|        |                   |
|--------|-------------------|
| CYFIP1 | hsa-miR-7118-3p   |
| CYFIP1 | hsa-miR-330-3p.2  |
| CYFIP1 | hsa-miR-6928-3p   |
| CYFIP1 | hsa-miR-2482      |
| CYFIP1 | hsa-miR-514b-5p   |
| CYFIP1 | hsa-miR-200-3p    |
| CYFIP1 | hsa-miR-7238-3p   |
| CYFIP1 | hsa-miR-8908f     |
| CYFIP1 | hsa-miR-4679      |
| CYFIP1 | hsa-miR-4684-3p   |
| CYFIP1 | hsa-miR-5008-3p   |
| CYFIP1 | hsa-miR-1271-5p   |
| CYFIP1 | hsa-miR-6924-3p   |
| CYFIP1 | hsa-miR-155-5p    |
| CYFIP1 | hsa-miR-450b-5p   |
| CYFIP1 | hsa-miR-183-3p    |
| CYFIP1 | hsa-miR-1271-3p   |
| CYFIP1 | hsa-miR-2284ab    |
| CYFIP1 | hsa-miR-3681-5p   |
| CYFIP1 | hsa-miR-19        |
| CYFIP1 | hsa-miR-1285-5p   |
| CYFIP1 | hsa-miR-196a-3p   |
| CYFIP1 | hsa-miR-676-3p    |
| CYFIP1 | hsa-miR-5092      |
| CYFIP1 | hsa-miR-7031-5p   |
| CYFIP1 | hsa-miR-8820      |
| CYFIP1 | hsa-miR-6403      |
| CYFIP1 | hsa-miR-181a-1-3p |
| CYFIP1 | hsa-miR-7664-5p   |
| CYFIP1 | hsa-miR-7202-3p   |
| CYFIP1 | hsa-miR-3910      |
| CYFIP1 | hsa-miR-1179      |
| CYFIP1 | hsa-miR-4422      |
| CYFIP1 | hsa-miR-376c-5p   |
| CYFIP1 | hsa-miR-3079-5p   |
| CYFIP1 | hsa-miR-202-3p    |
| CYFIP1 | hsa-miR-5701      |
| CYFIP1 | hsa-miR-2307      |
| CYFIP1 | hsa-miR-344-3p    |
| CYFIP1 | hsa-miR-4328      |
| CYFIP1 | hsa-miR-7059-3p   |
| CYFIP1 | hsa-miR-4691-5p   |
| CYFIP1 | hsa-miR-2293      |
| CYFIP1 | hsa-miR-4658      |
| CYFIP1 | hsa-miR-217-3p    |
| CYFIP1 | hsa-miR-513a      |

|        |                  |
|--------|------------------|
| CYFIP1 | hsa-miR-508a     |
| CYFIP1 | hsa-miR-6836-3p  |
| CYFIP1 | hsa-miR-376b-5p  |
| CYFIP1 | hsa-miR-7162-3p  |
| CYFIP1 | hsa-miR-100-3p   |
| CYFIP1 | hsa-miR-876      |
| CYFIP1 | hsa-miR-3613-3p  |
| CYFIP1 | hsa-miR-5624-5p  |
| CYFIP1 | hsa-miR-4746-5p  |
| CYFIP1 | hsa-miR-374b-3p  |
| CYFIP1 | hsa-miR-6972-3p  |
| CYFIP1 | hsa-miR-8058     |
| CYFIP1 | hsa-miR-3914     |
| CYFIP1 | hsa-miR-7078-5p  |
| CYFIP1 | hsa-miR-1260a    |
| CYFIP1 | hsa-miR-192-5p   |
| CYFIP1 | hsa-miR-1236-5p  |
| CYFIP1 | hsa-miR-7284-3p  |
| CYFIP1 | hsa-miR-381-3p   |
| CYFIP1 | hsa-miR-219c-3p  |
| CYFIP1 | hsa-miR-4782-5p  |
| CYFIP1 | hsa-miR-526      |
| CYFIP1 | hsa-miR-5586-5p  |
| CYFIP1 | hsa-miR-1292-5p  |
| CYFIP1 | hsa-miR-6944-5p  |
| CYFIP1 | hsa-miR-4773     |
| CYFIP1 | hsa-miR-7386i-3p |
| CYFIP1 | hsa-miR-30e-3p   |
| CYFIP1 | hsa-miR-351-5p   |
| CYFIP1 | hsa-miR-211-5p   |
| CYFIP1 | hsa-miR-576-5p   |
| CYFIP1 | hsa-miR-1-3p     |
| CYFIP1 | hsa-miR-7307-3p  |
| CYFIP1 | hsa-miR-1185-5p  |
| CYFIP1 | hsa-miR-7193-3p  |
| CYFIP1 | hsa-miR-6747-3p  |
| CYFIP1 | hsa-miR-6751-3p  |
| CYFIP1 | hsa-miR-6126     |
| CYFIP1 | hsa-miR-880-5p   |
| CYFIP1 | hsa-miR-224-5p   |
| CYFIP1 | hsa-miR-3072-3p  |
| CYFIP1 | hsa-miR-214-3p   |
| CYFIP1 | hsa-miR-411-3p   |
| CYFIP1 | hsa-miR-203      |
| CYFIP1 | hsa-miR-1260b    |
| CYFIP1 | hsa-miR-6938-3p  |

|        |                   |
|--------|-------------------|
| CYFIP1 | hsa-miR-6720-5p   |
| CYFIP1 | hsa-miR-7977      |
| CYFIP1 | hsa-miR-8842      |
| CYFIP1 | hsa-miR-3619-5p   |
| CYFIP1 | hsa-miR-2486-3p   |
| CYFIP1 | hsa-miR-4660      |
| CYFIP1 | hsa-miR-6949-3p   |
| CYFIP1 | hsa-miR-1184      |
| CYFIP1 | hsa-miR-371b-5p   |
| CYFIP1 | hsa-miR-6335      |
| CYFIP1 | hsa-miR-8821      |
| CYFIP1 | hsa-miR-7200-3p   |
| CYFIP1 | hsa-miR-509-3p    |
| CYFIP1 | hsa-miR-8069      |
| CYFIP1 | hsa-miR-6877-3p   |
| CYFIP1 | hsa-miR-373-5p    |
| CYFIP1 | hsa-miR-518g-3p   |
| CYFIP1 | hsa-miR-4685-3p   |
| CYFIP1 | hsa-miR-499-5p    |
| CYFIP1 | hsa-miR-518-5p    |
| CYFIP1 | hsa-miR-29a-5p    |
| CYFIP1 | hsa-miR-5787      |
| CYFIP1 | hsa-miR-29a-3p    |
| CYFIP1 | hsa-miR-488-3p    |
| CYFIP1 | hsa-miR-6329      |
| CYFIP1 | hsa-miR-196c-3p   |
| CYFIP1 | hsa-miR-4727-3p   |
| CYFIP1 | hsa-miR-6500-3p   |
| CYFIP1 | hsa-miR-136-5p    |
| CYFIP1 | hsa-miR-101b-3p.2 |
| CYFIP1 | hsa-let-7c-1-3p   |
| CYFIP1 | hsa-miR-8877      |
| CYFIP1 | hsa-miR-5007-3p   |
| CYFIP1 | hsa-miR-429       |
| CYFIP1 | hsa-miR-629-3p    |
| CYFIP1 | hsa-miR-7215-5p   |
| CYFIP1 | hsa-miR-2319      |
| CYFIP1 | hsa-miR-98-3p     |
| CYFIP1 | hsa-miR-4267      |
| CYFIP1 | hsa-miR-3074-5p   |
| CYFIP1 | hsa-miR-6081      |
| CYFIP1 | hsa-miR-497-3p    |
| CYFIP1 | hsa-miR-1191b-3p  |
| CYFIP1 | hsa-miR-627-3p    |
| CYFIP1 | hsa-miR-6918-5p   |
| CYFIP1 | hsa-miR-2284d     |

|        |                  |
|--------|------------------|
| CYFIP1 | hsa-miR-6792-3p  |
| CYFIP1 | hsa-miR-378j     |
| CYFIP1 | hsa-miR-425      |
| CYFIP1 | hsa-miR-101-3p.2 |
| CYFIP1 | hsa-miR-7210-5p  |
| CYFIP1 | hsa-miR-1183     |
| CYFIP1 | hsa-miR-5696     |
| CYFIP1 | hsa-miR-3473f    |
| CYFIP1 | hsa-miR-136-5p   |
| CYFIP1 | hsa-miR-6072     |
| CYFIP1 | hsa-miR-433-3p   |
| CYFIP1 | hsa-miR-2284c    |
| CYFIP1 | hsa-miR-1787     |
| CYFIP1 | hsa-miR-6414     |
| CYFIP1 | hsa-miR-4795-3p  |
| CYFIP1 | hsa-miR-7269-5p  |
| CYFIP1 | hsa-miR-3121-3p  |
| CYFIP1 | hsa-miR-7086-5p  |
| CYFIP1 | hsa-miR-2335     |
| CYFIP1 | hsa-miR-466b-5p  |
| CYFIP1 | hsa-miR-1933-5p  |
| CYFIP1 | hsa-miR-6122-3p  |
| CYFIP1 | hsa-miR-944      |
| CYFIP1 | hsa-miR-129-2-3p |
| CYFIP1 | hsa-miR-370-5p   |
| CYFIP1 | hsa-miR-3907     |
| CYFIP1 | hsa-miR-6343     |
| CYFIP1 | hsa-miR-7234-5p  |
| CYFIP1 | hsa-miR-299-5p   |
| CYFIP1 | hsa-miR-3068-3p  |
| CYFIP1 | hsa-miR-600      |
| CYFIP1 | hsa-miR-4724-5p  |
| CYFIP1 | hsa-miR-133c     |
| CYFIP1 | hsa-miR-6892-5p  |
| CYFIP1 | hsa-miR-7249-3p  |
| CYFIP1 | hsa-miR-8485     |
| CYFIP1 | hsa-miR-3691-5p  |
| CYFIP1 | hsa-miR-7159-3p  |
| CYFIP1 | hsa-miR-29b-5p   |
| CYFIP1 | hsa-miR-106a-3p  |
| CYFIP1 | hsa-miR-6134     |
| CYFIP1 | hsa-miR-6811-3p  |
| CYFIP1 | hsa-miR-1207     |
| CYFIP1 | hsa-miR-7849-3p  |
| CYFIP1 | hsa-miR-335-5p   |
| CYFIP1 | hsa-miR-29b-2-5p |



|        |                  |
|--------|------------------|
| CYFIP1 | hsa-miR-18-3p    |
| CYFIP1 | hsa-miR-1322     |
| CYFIP1 | hsa-miR-200c-3p  |
| CYFIP1 | hsa-miR-2400     |
| CYFIP1 | hsa-miR-655      |
| CYFIP1 | hsa-miR-6750-5p  |
| CYFIP1 | hsa-miR-6735-5p  |
| CYFIP1 | hsa-miR-4762-3p  |
| CYFIP1 | hsa-miR-137      |
| CYFIP1 | hsa-miR-2303     |
| CYFIP1 | hsa-miR-4663     |
| CYFIP1 | hsa-miR-6891-3p  |
| CYFIP1 | hsa-miR-6757-5p  |
| CYFIP1 | hsa-miR-4766-5p  |
| CYFIP1 | hsa-miR-6762-3p  |
| CYFIP1 | hsa-miR-8791     |
| CYFIP1 | hsa-miR-1912     |
| CYFIP1 | hsa-miR-466b-3p  |
| CYFIP1 | hsa-miR-8829     |
| CYFIP1 | hsa-miR-7373b-3p |
| CYFIP1 | hsa-miR-486-5p   |
| CYFIP1 | hsa-miR-4662a-3p |
| CYFIP1 | hsa-miR-3915     |
| CYFIP1 | hsa-miR-374a-5p  |
| CYFIP1 | hsa-miR-7652-3p  |
| CYFIP1 | hsa-miR-7230-3p  |
| CYFIP1 | hsa-miR-7217-5p  |
| CYFIP1 | hsa-miR-2113     |
| CYFIP1 | hsa-miR-6572-5p  |
| CYFIP1 | hsa-miR-6821-3p  |
| CYFIP1 | hsa-miR-326      |
| CYFIP1 | hsa-miR-2681-5p  |
| CYFIP1 | hsa-miR-185-5p   |
| CYFIP1 | hsa-miR-323      |
| CYFIP1 | hsa-miR-2369     |
| CYFIP1 | hsa-miR-548av-3p |
| CYFIP1 | hsa-miR-302a-3p  |
| CYFIP1 | hsa-miR-3163     |
| CYFIP1 | hsa-miR-1272     |
| CYFIP1 | hsa-miR-616-5p   |
| CYFIP1 | hsa-miR-6896-3p  |
| CYFIP1 | hsa-miR-508-5p   |
| CYFIP1 | hsa-miR-137-3p   |
| CYFIP1 | hsa-miR-194-5p   |
| CYFIP1 | hsa-miR-347      |
| CYFIP1 | hsa-miR-215-5p   |

|        |                  |
|--------|------------------|
| CYFIP1 | hsa-miR-6320     |
| CYFIP1 | hsa-miR-659-3p   |
| CYFIP1 | hsa-miR-1298-3p  |
| CYFIP1 | hsa-miR-4711-5p  |
| CYFIP1 | hsa-miR-1273f    |
| CYFIP1 | hsa-miR-655-5p   |
| CYFIP1 | hsa-miR-591      |
| CYFIP1 | hsa-miR-519e-3p  |
| CYFIP1 | hsa-miR-411a     |
| CYFIP1 | hsa-miR-6376     |
| CYFIP1 | hsa-miR-702-3p   |
| CYFIP1 | hsa-miR-1264     |
| CYFIP1 | hsa-miR-379-5p   |
| CYFIP1 | hsa-miR-105-5p   |
| CYFIP1 | hsa-miR-698-3p   |
| CYFIP1 | hsa-miR-3144-3p  |
| CYFIP1 | hsa-miR-1290     |
| CYFIP1 | hsa-miR-1964-5p  |
| CYFIP1 | hsa-miR-7324-5p  |
| CYFIP1 | hsa-miR-5700     |
| CYFIP1 | hsa-miR-4747-5p  |
| CYFIP1 | hsa-miR-7006-5p  |
| CYFIP1 | hsa-miR-7190-5p  |
| CYFIP1 | hsa-miR-874-3p   |
| CYFIP1 | hsa-miR-6843-3p  |
| CYFIP1 | hsa-miR-30-3p    |
| CYFIP1 | hsa-miR-4774-3p  |
| CYFIP1 | hsa-miR-1556     |
| CYFIP1 | hsa-miR-766-3p   |
| CYFIP1 | hsa-miR-3614-5p  |
| CYFIP1 | hsa-miR-2373-5p  |
| CYFIP1 | hsa-miR-922      |
| CYFIP1 | hsa-miR-4680     |
| CYFIP1 | hsa-miR-4804-3p  |
| CYFIP1 | hsa-miR-2292     |
| CYFIP1 | hsa-miR-101-3p.1 |
| CYFIP1 | hsa-miR-4448     |
| CYFIP1 | hsa-miR-2382-3p  |
| CYFIP1 | hsa-miR-30b-3p   |
| CYFIP1 | hsa-miR-4780     |
| CYFIP1 | hsa-miR-7386g-3p |
| CYFIP1 | hsa-miR-7364-5p  |
| CYFIP1 | hsa-miR-2114-5p  |
| CYFIP1 | hsa-miR-6960-5p  |
| CYFIP1 | hsa-miR-5697-3p  |
| CYFIP1 | hsa-miR-6330     |

|        |                  |
|--------|------------------|
| CYFIP1 | hsa-miR-421      |
| CYFIP1 | hsa-miR-6344     |
| CYFIP1 | hsa-miR-4261     |
| CYFIP1 | hsa-miR-7119-5p  |
| CYFIP1 | hsa-miR-3152-5p  |
| CYFIP1 | hsa-miR-3102     |
| CYFIP1 | hsa-miR-584-5p   |
| CYFIP1 | hsa-miR-769      |
| CYFIP1 | hsa-miR-190a-3p  |
| CYFIP1 | hsa-miR-367-5p   |
| CYFIP1 | hsa-miR-150-5p   |
| CYFIP1 | hsa-miR-8874     |
| CYFIP1 | hsa-miR-28-5p    |
| CYFIP1 | hsa-miR-7186-3p  |
| CYFIP1 | hsa-miR-7016-3p  |
| CYFIP1 | hsa-miR-541-5p   |
| CYFIP1 | hsa-miR-1542-3p  |
| CYFIP1 | hsa-miR-742-3p   |
| CYFIP1 | hsa-miR-330-3p   |
| CYFIP1 | hsa-miR-675-3p   |
| CYFIP1 | hsa-miR-105b     |
| CYFIP1 | hsa-miR-6939-3p  |
| CYFIP1 | hsa-miR-1914-5p  |
| CYFIP1 | hsa-miR-506-3p   |
| CYFIP1 | hsa-miR-4788     |
| CYFIP1 | hsa-miR-3174     |
| CYFIP1 | hsa-miR-5626-5p  |
| CYFIP1 | hsa-miR-8831     |
| CYFIP1 | hsa-miR-7192-3p  |
| CYFIP1 | hsa-miR-3162-5p  |
| CYFIP1 | hsa-miR-146      |
| CYFIP1 | hsa-miR-7649-3p  |
| CYFIP1 | hsa-miR-2299-5p  |
| CYFIP1 | hsa-miR-1-5p     |
| CYFIP1 | hsa-miR-9768-3p  |
| CYFIP1 | hsa-miR-1843a-5p |
| CYFIP1 | hsa-miR-4753-3p  |
| CYFIP1 | hsa-miR-569      |
| CYFIP1 | hsa-miR-6850-5p  |
| CYFIP1 | hsa-miR-448-3p   |
| CYFIP1 | hsa-miR-369-3p   |
| CYFIP1 | hsa-miR-135-5p   |
| CYFIP1 | hsa-miR-3927-3p  |
| CYFIP1 | hsa-miR-4645-3p  |
| CYFIP1 | hsa-miR-434-3p   |
| CYFIP1 | hsa-miR-378-3p   |

|        |                  |
|--------|------------------|
| CYFIP1 | hsa-miR-181c-3p  |
| CYFIP1 | hsa-miR-101c     |
| CYFIP1 | hsa-miR-146b-3p  |
| CYFIP1 | hsa-miR-6951-3p  |
| CYFIP1 | hsa-miR-6350     |
| CYFIP1 | hsa-miR-1837     |
| CYFIP1 | hsa-miR-433      |
| CYFIP1 | hsa-miR-4514     |
| CYFIP1 | hsa-miR-6951-5p  |
| CYFIP1 | hsa-miR-141-5p   |
| CYFIP1 | hsa-miR-2429     |
| CYFIP1 | hsa-miR-527      |
| CYFIP1 | hsa-miR-342-3p   |
| CYFIP1 | hsa-miR-4282     |
| CYFIP1 | hsa-miR-3613-5p  |
| CYFIP1 | hsa-miR-5113     |
| CYFIP1 | hsa-miR-5004-5p  |
| CYFIP1 | hsa-miR-3618-5p  |
| CYFIP1 | hsa-miR-7241-5p  |
| CYFIP1 | hsa-miR-218-5p   |
| CYFIP1 | hsa-miR-7371f-5p |
| CYFIP1 | hsa-miR-193      |
| CYFIP1 | hsa-miR-5002-5p  |
| CYFIP1 | hsa-miR-761      |
| CYFIP1 | hsa-miR-4305     |
| CYFIP1 | hsa-miR-636      |
| CYFIP1 | hsa-miR-299-3p   |
| CYFIP1 | hsa-miR-103      |
| CYFIP1 | hsa-miR-6078     |
| CYFIP1 | hsa-miR-7398r-3p |
| CYFIP1 | hsa-miR-517      |
| CYFIP1 | hsa-miR-2116-3p  |
| CYFIP1 | hsa-miR-7450-5p  |
| CYFIP1 | hsa-miR-548b-3p  |
| CYFIP1 | hsa-miR-203-5p   |
| CYFIP1 | hsa-miR-568      |
| CYFIP1 | hsa-miR-6853-5p  |
| CYFIP1 | hsa-miR-7854-3p  |
| CYFIP1 | hsa-miR-651      |
| CYFIP1 | hsa-miR-7334-3p  |
| CYFIP1 | hsa-miR-3185     |
| CYFIP1 | hsa-miR-6891-5p  |
| CYFIP1 | hsa-miR-7166-5p  |
| CYFIP1 | hsa-miR-374-3p   |
| CYFIP1 | hsa-miR-6943-3p  |
| CYFIP1 | hsa-miR-3140-3p  |

|        |                  |
|--------|------------------|
| CYFIP1 | hsa-miR-3573-3p  |
| CYFIP1 | hsa-miR-6537-5p  |
| CYFIP1 | hsa-miR-698-5p   |
| CYFIP1 | hsa-miR-8799     |
| CYFIP1 | hsa-miR-7036b-3p |
| CYFIP1 | hsa-miR-3576     |
| CYFIP1 | hsa-miR-6832-3p  |
| CYFIP1 | hsa-miR-4797-5p  |
| CYFIP1 | hsa-miR-302d-5p  |
| CYFIP1 | hsa-miR-6930-3p  |
| CYFIP1 | hsa-miR-6079     |
| CYFIP1 | hsa-miR-668-3p   |
| CYFIP1 | hsa-miR-4513     |
| CYFIP1 | hsa-miR-7069-3p  |
| CYFIP1 | hsa-miR-643      |
| CYFIP1 | hsa-miR-2957     |
| CYFIP1 | hsa-miR-496-3p   |
| CYFIP1 | hsa-miR-3927-3p  |
| CYFIP1 | hsa-miR-6514-3p  |
| CYFIP1 | hsa-miR-135b-3p  |
| CYFIP1 | hsa-miR-3561-5p  |
| CYFIP1 | hsa-miR-6938-5p  |
| CYFIP1 | hsa-miR-1198-5p  |
| CYFIP1 | hsa-miR-21-3p    |
| CYFIP1 | hsa-miR-598-5p   |
| CYFIP1 | hsa-miR-613      |
| CYFIP1 | hsa-miR-6881-3p  |
| CYFIP1 | hsa-miR-4520-5p  |
| CYFIP1 | hsa-miR-211-5p   |
| CYFIP1 | hsa-miR-302c-3p  |
| CYFIP1 | hsa-miR-513c-3p  |
| CYFIP1 | hsa-miR-3961     |
| CYFIP1 | hsa-let-7a-3p    |
| CYFIP1 | hsa-miR-7112-3p  |
| CYFIP1 | hsa-miR-8809     |
| CYFIP1 | hsa-miR-4445-5p  |
| CYFIP1 | hsa-miR-3109-3p  |
| CYFIP1 | hsa-miR-3173-3p  |
| CYFIP1 | hsa-miR-6941-3p  |
| CYFIP1 | hsa-miR-7045-3p  |
| CYFIP1 | hsa-miR-132-3p   |
| CYFIP1 | hsa-miR-485      |
| CYFIP1 | hsa-miR-6889-3p  |
| CYFIP1 | hsa-miR-1282     |
| CYFIP1 | hsa-miR-203-3p.2 |
| CYFIP1 | hsa-miR-2421     |

|        |                  |
|--------|------------------|
| CYFIP1 | hsa-miR-8800     |
| CYFIP1 | hsa-miR-7398l-3p |
| CYFIP1 | hsa-miR-331-5p   |
| CYFIP1 | hsa-miR-1795     |
| CYFIP1 | hsa-miR-7641     |
| CYFIP1 | hsa-miR-3958     |
| CYFIP1 | hsa-miR-16-1-3p  |
| CYFIP1 | hsa-miR-5695     |
| CYFIP1 | hsa-miR-7093-3p  |
| CYFIP1 | hsa-miR-1224-5p  |
| CYFIP1 | hsa-miR-4526     |
| CYFIP1 | hsa-miR-489-5p   |
| CYFIP1 | hsa-miR-7674-3p  |
| CYFIP1 | hsa-miR-1264-3p  |
| CYFIP1 | hsa-miR-1a-5p    |
| CYFIP1 | hsa-miR-8104     |
| CYFIP1 | hsa-miR-96-3p    |
| CYFIP1 | hsa-miR-7464-5p  |
| CYFIP1 | hsa-miR-6524     |
| CYFIP1 | hsa-miR-8846     |
| CYFIP1 | hsa-miR-4678     |
| CYFIP1 | hsa-miR-154a     |
| CYFIP1 | hsa-miR-3607-5p  |
| CYFIP1 | hsa-miR-590-3p   |
| CYFIP1 | hsa-miR-2399-5p  |
| CYFIP1 | hsa-miR-548c-3p  |
| CYFIP1 | hsa-miR-93-3p    |
| CYFIP1 | hsa-miR-6822-5p  |
| CYFIP1 | hsa-miR-675-5p   |
| CYFIP1 | hsa-miR-891      |
| CYFIP1 | hsa-miR-4530     |
| CYFIP1 | hsa-miR-7856-5p  |
| CYFIP1 | hsa-miR-7702     |
| CYFIP1 | hsa-miR-3130-5p  |
| CYFIP1 | hsa-miR-200c-5p  |
| CYFIP1 | hsa-miR-183-5p   |
| CYFIP1 | hsa-miR-582-5p   |
| CYFIP1 | hsa-miR-6346     |
| CYFIP1 | hsa-miR-151-3p   |
| CYFIP1 | hsa-miR-597-5p   |
| CYFIP1 | hsa-miR-323b-3p  |
| CYFIP1 | hsa-miR-17-3p    |
| CYFIP1 | hsa-miR-208-3p   |
| CYFIP1 | hsa-miR-6517     |
| CYFIP1 | hsa-miR-5687     |
| CYFIP1 | hsa-miR-587      |

|        |                  |
|--------|------------------|
| CYFIP1 | hsa-miR-1243-3p  |
| CYFIP1 | hsa-miR-6957-3p  |
| CYFIP1 | hsa-miR-7398a-3p |
| CYFIP1 | hsa-miR-466mo-3p |
| CYFIP1 | hsa-miR-519-5p   |
| CYFIP1 | hsa-miR-2284x    |
| CYFIP1 | hsa-miR-510      |
| CYFIP1 | hsa-miR-3121-5p  |
| CYFIP1 | hsa-miR-7382-3p  |
| CYFIP1 | hsa-miR-3108-5p  |
| CYFIP1 | hsa-miR-3120-3p  |
| CYFIP1 | hsa-miR-5118     |
| CYFIP1 | hsa-miR-7236-5p  |
| CYFIP1 | hsa-miR-6802-3p  |
| CYFIP1 | hsa-miR-3145-3p  |
| CYFIP1 | hsa-miR-103-5p   |
| CYFIP1 | hsa-miR-299a-5p  |
| CYFIP1 | hsa-miR-6878-3p  |
| CYFIP1 | hsa-let-7f-1-3p  |
| CYFIP1 | hsa-miR-516b     |
| CYFIP1 | hsa-miR-584-3p   |
| CYFIP1 | hsa-miR-1-3p     |
| CYFIP1 | hsa-miR-6758-3p  |
| CYFIP1 | hsa-miR-3586-5p  |
| CYFIP1 | hsa-miR-2483-3p  |
| CYFIP1 | hsa-miR-1262-5p  |
| CYFIP1 | hsa-miR-700-5p   |
| CYFIP1 | hsa-miR-148-3p   |
| CYFIP1 | hsa-miR-7-5p     |
| CYFIP1 | hsa-miR-219b-5p  |
| CYFIP1 | hsa-miR-2485     |
| CYFIP1 | hsa-miR-7340-3p  |
| CYFIP1 | hsa-miR-7398m-3p |
| CYFIP1 | hsa-miR-1-1-5p   |
| CYFIP1 | hsa-miR-218-5p   |
| CYFIP1 | hsa-miR-758-3p   |
| CYFIP1 | hsa-miR-7398u-3p |
| CYFIP1 | hsa-miR-195-3p   |
| CYFIP1 | hsa-miR-4652-3p  |
| CYFIP1 | hsa-let-7b-3p    |
| CYFIP1 | hsa-miR-4695-3p  |
| CYFIP1 | hsa-miR-770-3p   |
| CYFIP1 | hsa-miR-6565-3p  |
| CYFIP1 | hsa-miR-6131     |
| CYFIP1 | hsa-miR-495-3p   |
| CYFIP1 | hsa-miR-6828-5p  |

|        |                  |
|--------|------------------|
| CYFIP1 | hsa-miR-3560     |
| CYFIP1 | hsa-miR-5003-5p  |
| CYFIP1 | hsa-miR-6829-3p  |
| CYFIP1 | hsa-miR-6510-5p  |
| CYFIP1 | hsa-miR-93-5p    |
| CYFIP1 | hsa-miR-3572-3p  |
| CYFIP1 | hsa-miR-7157-5p  |
| CYFIP1 | hsa-miR-7398b-3p |
| CYFIP1 | hsa-miR-6919-5p  |
| CYFIP1 | hsa-miR-1224-3p  |
| CYFIP1 | hsa-miR-2285x    |
| CYFIP1 | hsa-miR-1973     |
| CYFIP1 | hsa-miR-29       |
| CYFIP1 | hsa-miR-9b-3p    |
| CYFIP1 | hsa-miR-33-5p    |
| CYFIP1 | hsa-miR-152-3p   |
| CYFIP1 | hsa-miR-516a-3p  |
| CYFIP1 | hsa-miR-717      |
| CYFIP1 | hsa-miR-668      |
| CYFIP1 | hsa-miR-6827-5p  |
| CYFIP1 | hsa-miR-3192     |
| CYFIP1 | hsa-miR-2285u    |
| CYFIP1 | hsa-miR-4475     |
| CYFIP1 | hsa-miR-6910-5p  |
| CYFIP1 | hsa-miR-107-3p   |
| CYFIP1 | hsa-miR-203b-3p  |
| CYFIP1 | hsa-miR-30-5p    |
| CYFIP1 | hsa-miR-3065-5p  |
| CYFIP1 | hsa-miR-4640-3p  |
| CYFIP1 | hsa-miR-6823-5p  |
| CYFIP1 | hsa-miR-4279     |
| CYFIP1 | hsa-miR-590-5p   |
| CYFIP1 | hsa-miR-6764-5p  |
| CYFIP1 | hsa-miR-7052-3p  |
| CYFIP1 | hsa-miR-466dk-5p |
| CYFIP1 | hsa-miR-8884     |
| CYFIP1 | hsa-miR-694      |
| CYFIP1 | hsa-miR-6516-3p  |
| CYFIP1 | hsa-miR-3652     |
| CYFIP1 | hsa-miR-889-3p   |
| CYFIP1 | hsa-miR-6839-5p  |
| CYFIP1 | hsa-miR-6988-3p  |
| CYFIP1 | hsa-miR-381-3p   |
| CYFIP1 | hsa-miR-5000-5p  |
| CYFIP1 | hsa-miR-7455-3p  |
| CYFIP1 | hsa-miR-2285j    |



|        |                  |
|--------|------------------|
| CYFIP1 | hsa-miR-143-3p   |
| CYFIP1 | hsa-miR-1752     |
| CYFIP1 | hsa-miR-2353     |
| CYFIP1 | hsa-miR-1283a    |
| CYFIP1 | hsa-miR-7440-3p  |
| CYFIP1 | hsa-miR-548ba    |
| CYFIP1 | hsa-miR-6866-5p  |
| CYFIP1 | hsa-miR-4471     |
| CYFIP1 | hsa-miR-432-3p   |
| CYFIP1 | hsa-miR-6124     |
| CYFIP1 | hsa-miR-8059     |
| CYFIP1 | hsa-miR-7178-5p  |
| CYFIP1 | hsa-miR-550a-3p  |
| CYFIP1 | hsa-miR-7094-3p  |
| CYFIP1 | hsa-miR-340-5p   |
| CYFIP1 | hsa-miR-2325b    |
| CYFIP1 | hsa-miR-513c-5p  |
| CYFIP1 | hsa-miR-8076     |
| CYFIP1 | hsa-miR-16-3p    |
| CYFIP1 | hsa-miR-5088-3p  |
| CYFIP1 | hsa-miR-5196-3p  |
| CYFIP1 | hsa-miR-1266     |
| CYFIP1 | hsa-miR-4256     |
| CYFIP1 | hsa-miR-502a     |
| CYFIP1 | hsa-miR-4775     |
| CYFIP1 | hsa-miR-1805-3p  |
| CYFIP1 | hsa-miR-204-5p   |
| CYFIP1 | hsa-miR-190b-3p  |
| CYFIP1 | hsa-miR-553      |
| CYFIP1 | hsa-miR-3167-3p  |
| CYFIP1 | hsa-miR-216-3p   |
| CYFIP1 | hsa-miR-196      |
| CYFIP1 | hsa-miR-4713-5p  |
| CYFIP1 | hsa-miR-6867-3p  |
| CYFIP1 | hsa-miR-339-5p   |
| CYFIP1 | hsa-miR-6507-5p  |
| CYFIP1 | hsa-miR-548az-5p |
| CYFIP1 | hsa-miR-548au-3p |
| CYFIP1 | hsa-miR-6991-5p  |
| CYFIP1 | hsa-miR-5009-3p  |
| CYFIP1 | hsa-miR-7646-3p  |
| CYFIP1 | hsa-miR-7206-5p  |
| CYFIP1 | hsa-miR-7445-5p  |
| CYFIP1 | hsa-miR-576-5p   |
| CYFIP1 | hsa-miR-7670-5p  |
| CYFIP1 | hsa-miR-8904b    |

|        |                   |
|--------|-------------------|
| CYFIP1 | hsa-miR-372-5p    |
| CYFIP1 | hsa-miR-561-3p    |
| CYFIP1 | hsa-miR-6855-3p   |
| CYFIP1 | hsa-miR-7114-5p   |
| CYFIP1 | hsa-miR-1225-3p   |
| CYFIP1 | hsa-miR-8906      |
| CYFIP1 | hsa-miR-874-5p    |
| CYFIP1 | hsa-miR-194-5p    |
| CYFIP1 | hsa-miR-215       |
| CYFIP1 | hsa-miR-3938-5p   |
| CYFIP1 | hsa-miR-16-2-3p   |
| CYFIP1 | hsa-miR-1264-5p   |
| CYFIP1 | hsa-miR-148a-5p   |
| CYFIP1 | hsa-miR-145a-3p   |
| CYFIP1 | hsa-miR-880-3p    |
| CYFIP1 | hsa-miR-140-5p    |
| CYFIP1 | hsa-miR-346-3p    |
| CYFIP1 | hsa-miR-224-5p    |
| CYFIP1 | hsa-miR-4477a     |
| CYFIP1 | hsa-miR-465c-5p   |
| CYFIP1 | hsa-miR-6317      |
| CYFIP1 | hsa-miR-7243-5p   |
| CYFIP1 | hsa-miR-1301-3p   |
| CYFIP1 | hsa-miR-197-3p    |
| CYFIP1 | hsa-miR-1202      |
| CYFIP1 | hsa-miR-16-5p     |
| CYFIP1 | hsa-miR-6831-5p   |
| CYFIP1 | hsa-miR-125b-2-3p |
| CYFIP1 | hsa-miR-125       |
| CYFIP1 | hsa-miR-6941-5p   |
| CYFIP1 | hsa-miR-1199-5p   |
| CYFIP1 | hsa-miR-7292-5p   |
| CYFIP1 | hsa-miR-1299      |
| CYFIP1 | hsa-miR-17-5p     |
| CYFIP1 | hsa-miR-6499-3p   |
| CYFIP1 | hsa-miR-576-3p    |
| CYFIP1 | hsa-miR-3133      |
| CYFIP1 | hsa-miR-101-1-5p  |
| CYFIP1 | hsa-miR-1915-5p   |
| CYFIP1 | hsa-miR-7290-5p   |
| CYFIP1 | hsa-miR-451-3p    |
| CYFIP1 | hsa-miR-891-3p    |
| CYFIP1 | hsa-miR-345-3p    |
| CYFIP1 | hsa-miR-34-5p     |
| CYFIP1 | hsa-miR-1205      |
| CYFIP1 | hsa-miR-2909      |

|        |                   |
|--------|-------------------|
| CYFIP1 | hsa-miR-3664-3p   |
| CYFIP1 | hsa-miR-672-3p    |
| CYFIP1 | hsa-miR-7024-5p   |
| CYFIP1 | hsa-miR-2428      |
| CYFIP1 | hsa-miR-7297-3p   |
| CYFIP1 | hsa-miR-6515-3p   |
| CYFIP1 | hsa-miR-6944-3p   |
| CYFIP1 | hsa-miR-146-5p    |
| CYFIP1 | hsa-miR-6903-3p   |
| CYFIP1 | hsa-miR-1287-5p   |
| CYFIP1 | hsa-miR-2426      |
| CYFIP1 | hsa-miR-206-5p    |
| CYFIP1 | hsa-miR-200bc     |
| CYFIP1 | hsa-miR-1252      |
| CYFIP1 | hsa-miR-22-3p     |
| CYFIP1 | hsa-miR-597       |
| CYFIP1 | hsa-miR-483-3p.2  |
| CYFIP1 | hsa-miR-4722-3p   |
| CYFIP1 | hsa-miR-384       |
| CYFIP1 | hsa-miR-8838      |
| CYFIP1 | hsa-miR-370-3p    |
| CYFIP1 | hsa-miR-670       |
| CYFIP1 | hsa-miR-6948-3p   |
| CYFIP1 | hsa-miR-4424      |
| CYFIP1 | hsa-miR-6377      |
| CYFIP1 | hsa-let-7d-3p     |
| CYFIP1 | hsa-miR-4729      |
| CYFIP1 | hsa-miR-6858-3p   |
| CYFIP1 | hsa-miR-7314-5p   |
| CYFIP1 | hsa-miR-374c-5p   |
| CYFIP1 | hsa-miR-3942-3p   |
| CYFIP1 | hsa-miR-34a-3p    |
| CYFIP1 | hsa-miR-7188-5p   |
| CYFIP1 | hsa-miR-1287      |
| CYFIP1 | hsa-miR-2284z     |
| CYFIP1 | hsa-miR-5621-5p   |
| CYFIP1 | hsa-miR-32-3p     |
| CYFIP1 | hsa-miR-1839      |
| CYFIP1 | hsa-miR-129b-5p   |
| CYFIP1 | hsa-miR-199b-3-5p |
| CYFIP1 | hsa-miR-29b-1-5p  |
| CYFIP1 | hsa-miR-302c-5p   |
| CYFIP1 | hsa-miR-545-3p    |
| CYFIP1 | hsa-miR-6885-3p   |
| CYFIP1 | hsa-miR-296-5p    |
| CYFIP1 | hsa-miR-7473-5p   |

|        |                   |
|--------|-------------------|
| CYFIP1 | hsa-miR-344b-3p   |
| CYFIP1 | hsa-miR-3591-5p   |
| CYFIP1 | hsa-miR-2284v     |
| CYFIP1 | hsa-miR-1811      |
| CYFIP1 | hsa-miR-454-3p    |
| CYFIP1 | hsa-miR-570-5p    |
| CYFIP1 | hsa-miR-323a-3p   |
| CYFIP1 | hsa-miR-7204-5p   |
| CYFIP1 | hsa-miR-3682-3p   |
| CYFIP1 | hsa-miR-219-5p    |
| CYFIP1 | hsa-miR-9769-3p   |
| CYFIP1 | hsa-miR-7178-3p   |
| CYFIP1 | hsa-miR-8065      |
| CYFIP1 | hsa-miR-551-5p    |
| CYFIP1 | hsa-miR-1250-3p   |
| CYFIP1 | hsa-miR-2326      |
| CYFIP1 | hsa-miR-379-3p    |
| CYFIP1 | hsa-miR-6872-3p   |
| CYFIP1 | hsa-miR-95-5p     |
| CYFIP1 | hsa-miR-4680-5p   |
| CYFIP1 | hsa-miR-2284w     |
| CYFIP1 | hsa-miR-548       |
| CYFIP1 | hsa-miR-7336-5p   |
| CYFIP1 | hsa-miR-3068-5p   |
| CYFIP1 | hsa-miR-7306-5p   |
| CYFIP1 | hsa-miR-1295b-5p  |
| CYFIP1 | hsa-miR-4716-5p   |
| CYFIP1 | hsa-miR-7157-3p   |
| CYFIP1 | hsa-miR-3135b     |
| CYFIP1 | hsa-miR-5002-3p   |
| CYFIP1 | hsa-miR-3596      |
| CYFIP1 | hsa-miR-532-3p    |
| CYFIP1 | hsa-miR-6849-3p   |
| CYFIP1 | hsa-miR-759       |
| CYFIP1 | hsa-miR-4760-5p   |
| CYFIP1 | hsa-miR-599       |
| CYFIP1 | hsa-miR-1255-3p   |
| CYFIP1 | hsa-miR-6912-5p   |
| CYFIP1 | hsa-miR-466bcp-3p |
| CYFIP1 | hsa-miR-8804      |
| CYFIP1 | hsa-miR-589-3p    |
| CYFIP1 | hsa-miR-2114-5p   |
| CYFIP1 | hsa-miR-1271-5p   |
| CYFIP1 | hsa-miR-1178-3p   |
| CYFIP1 | hsa-miR-545-5p    |
| CYFIP1 | hsa-miR-4659a-5p  |

|        |                   |
|--------|-------------------|
| CYFIP1 | hsa-miR-3095-5p   |
| CYFIP1 | hsa-miR-200a-3p   |
| CYFIP1 | hsa-miR-2115-3p   |
| CYFIP1 | hsa-miR-4666a-3p  |
| CYFIP1 | hsa-miR-743b-5p   |
| CYFIP1 | hsa-miR-7117-3p   |
| CYFIP1 | hsa-miR-671-5p    |
| CYFIP1 | hsa-miR-29a-3p    |
| CYFIP1 | hsa-miR-692       |
| CYFIP1 | hsa-miR-329-5p    |
| CYFIP1 | hsa-miR-182-5p    |
| CYFIP1 | hsa-miR-465a-5p   |
| CYFIP1 | hsa-miR-7457-3p   |
| CYFIP1 | hsa-miR-15-5p     |
| CYFIP1 | hsa-miR-103a-2-5p |
| CYFIP1 | hsa-miR-3613b     |
| CYFIP1 | hsa-miR-6701-3p   |
| CYFIP1 | hsa-miR-4474-3p   |
| CYFIP1 | hsa-miR-1544-3p   |
| CYFIP1 | hsa-miR-3618-3p   |
| CYFIP1 | hsa-miR-708-3p    |
| CYFIP1 | hsa-miR-2334      |
| CYFIP1 | hsa-miR-6736-3p   |
| CYFIP1 | hsa-miR-7093-5p   |
| CYFIP1 | hsa-miR-7021-3p   |
| CYFIP1 | hsa-let-7ag-3p    |
| CYFIP1 | hsa-miR-139-5p    |
| CYFIP1 | hsa-miR-743b-3p   |
| CYFIP1 | hsa-miR-30ad-3p   |
| CYFIP1 | hsa-miR-380       |
| CYFIP1 | hsa-miR-7348-3p   |
| CYFIP1 | hsa-miR-373-3p    |
| CYFIP1 | hsa-miR-7116-3p   |
| CYFIP1 | hsa-miR-691       |
| CYFIP1 | hsa-miR-424-5p    |
| CYFIP1 | hsa-miR-543-3p    |
| CYFIP1 | hsa-miR-367-3p    |
| CYFIP1 | hsa-miR-422       |
| CYFIP1 | hsa-miR-6950-5p   |
| CYFIP1 | hsa-miR-1976      |
| CYFIP1 | hsa-miR-298       |
| CYFIP1 | hsa-miR-616-3p    |
| CYFIP1 | hsa-miR-186-5p    |
| CYFIP1 | hsa-miR-425-5p    |
| CYFIP1 | hsa-miR-3116      |
| CYFIP1 | hsa-miR-6854-5p   |

|        |                  |
|--------|------------------|
| CYFIP1 | hsa-miR-6967-3p  |
| CYFIP1 | hsa-miR-769-5p   |
| CYFIP1 | hsa-miR-196-3p   |
| CYFIP1 | hsa-miR-130a-5p  |
| CYFIP1 | hsa-miR-140-5p   |
| CYFIP1 | hsa-miR-5187-3p  |
| CYFIP1 | hsa-miR-5196-5p  |
| CYFIP1 | hsa-miR-216b-3p  |
| CYFIP1 | hsa-miR-3145-5p  |
| CYFIP1 | hsa-miR-4480     |
| CYFIP1 | hsa-miR-429-3p   |
| CYFIP1 | hsa-miR-4482-3p  |
| CYFIP1 | hsa-miR-2116-5p  |
| CYFIP1 | hsa-miR-7855-5p  |
| CYFIP1 | hsa-miR-5682     |
| CYFIP1 | hsa-miR-152-5p   |
| CYFIP1 | hsa-miR-4521     |
| CYFIP1 | hsa-miR-6769b-5p |
| CYFIP1 | hsa-miR-375      |
| CYFIP1 | hsa-miR-7111-3p  |
| CYFIP1 | hsa-miR-6835-3p  |
| CYFIP1 | hsa-miR-1970     |
| CYFIP1 | hsa-miR-29-3p    |
| CYFIP1 | hsa-miR-548az-3p |
| CYFIP1 | hsa-miR-5692bc   |
| CYFIP1 | hsa-miR-1934-5p  |
| CYFIP1 | hsa-miR-6889-5p  |
| CYFIP1 | hsa-miR-1243     |
| CYFIP1 | hsa-miR-7213-3p  |
| CYFIP1 | hsa-miR-654-3p   |
| CYFIP1 | hsa-miR-493-5p   |
| CYFIP1 | hsa-miR-6502-3p  |
| CYFIP1 | hsa-miR-6900-3p  |
| CYFIP1 | hsa-miR-6898-5p  |
| CYFIP1 | hsa-miR-7677-5p  |
| CYFIP1 | hsa-miR-3057-3p  |
| CYFIP1 | hsa-miR-2285n    |
| CYFIP1 | hsa-miR-871-3p   |
| CYFIP1 | hsa-miR-876-5p   |
| CYFIP1 | hsa-miR-4522     |
| CYFIP1 | hsa-miR-743a-3p  |
| CYFIP1 | hsa-miR-34bc-3p  |
| CYFIP1 | hsa-miR-1840     |
| CYFIP1 | hsa-miR-3065-3p  |
| CYFIP1 | hsa-miR-935      |
| CYFIP1 | hsa-let-7-3p     |

|        |                   |
|--------|-------------------|
| CYFIP1 | hsa-miR-101a-3p.2 |
| CYFIP1 | hsa-miR-410       |
| CYFIP1 | hsa-miR-183-5p.1  |
| CYFIP1 | hsa-miR-4751      |
| CYFIP1 | hsa-miR-3660      |
| CYFIP1 | hsa-miR-362-3p    |
| CYFIP1 | hsa-miR-7221-5p   |
| CYFIP1 | hsa-miR-4659b-5p  |
| CYFIP1 | hsa-miR-672-5p    |
| CYFIP1 | hsa-miR-7023-5p   |
| CYFIP1 | hsa-miR-326-3p    |
| CYFIP1 | hsa-miR-101a-5p   |
| CYFIP1 | hsa-miR-487a      |
| CYFIP1 | hsa-miR-6899-3p   |
| CYFIP1 | hsa-miR-6516-5p   |
| CYFIP1 | hsa-miR-411-5p    |
| CYFIP1 | hsa-miR-7185-3p   |
| CYFIP1 | hsa-miR-4689      |
| CYFIP1 | hsa-miR-511-3p    |
| CYFIP1 | hsa-miR-712-5p    |
| CYFIP1 | hsa-miR-653-3p    |
| CYFIP1 | hsa-miR-186-3p    |
| CYFIP1 | hsa-miR-4520-3p   |
| CYFIP1 | hsa-miR-500       |
| CYFIP1 | hsa-miR-7169-5p   |
| CYFIP1 | hsa-miR-1266-5p   |
| CYFIP1 | hsa-miR-7046-3p   |
| CYFIP1 | hsa-miR-2392      |
| CYFIP1 | hsa-miR-6946-5p   |
| CYFIP1 | hsa-miR-201-5p    |
| CYFIP1 | hsa-miR-4670-3p   |
| CYFIP1 | hsa-miR-1254      |
| CYFIP1 | hsa-miR-134-5p    |
| CYFIP1 | hsa-miR-1233-3p   |
| CYFIP1 | hsa-miR-599-5p    |
| CYFIP1 | hsa-miR-7195-5p   |
| CYFIP1 | hsa-miR-548l      |
| CYFIP1 | hsa-miR-6790-3p   |
| CYFIP1 | hsa-miR-7287-5p   |
| CYFIP1 | hsa-miR-647       |
| CYFIP1 | hsa-miR-7161-3p   |
| CYFIP1 | hsa-miR-6844      |
| CYFIP1 | hsa-miR-187-5p    |
| CYFIP1 | hsa-miR-5580-5p   |
| CYFIP1 | hsa-miR-4291      |
| CYFIP1 | hsa-miR-424-5p    |

|        |                   |
|--------|-------------------|
| CYFIP1 | hsa-miR-188-3p    |
| CYFIP1 | hsa-miR-4733-5p   |
| CYFIP1 | hsa-miR-4703-3p   |
| CYFIP1 | hsa-miR-3583-5p   |
| CYFIP1 | hsa-miR-375-3p    |
| CYFIP1 | hsa-miR-510-3p    |
| CYFIP1 | hsa-miR-1252-5p   |
| CYFIP1 | hsa-miR-6749-3p   |
| CYFIP1 | hsa-miR-7176-3p   |
| CYFIP1 | hsa-miR-7089-3p   |
| CYFIP1 | hsa-miR-298-5p    |
| CYFIP1 | hsa-miR-33a-3p    |
| CYFIP1 | hsa-miR-433-5p    |
| CYFIP1 | hsa-miR-1193-5p   |
| CYFIP1 | hsa-miR-8067      |
| CYFIP1 | hsa-miR-548e-3p   |
| CYFIP1 | hsa-miR-616-3p    |
| CYFIP1 | hsa-miR-107       |
| CYFIP1 | hsa-miR-653       |
| CYFIP1 | hsa-miR-421-5p    |
| CYFIP1 | hsa-miR-7109-3p   |
| CYFIP1 | hsa-miR-6737-3p   |
| CYFIP1 | hsa-miR-3097-3p   |
| CYFIP1 | hsa-miR-203a-3p.1 |
| CYFIP1 | hsa-miR-6511-3p   |
| CYFIP1 | hsa-miR-141-3p    |
| CYFIP1 | hsa-miR-127-5p    |
| CYFIP1 | hsa-miR-6905-3p   |
| CYFIP1 | hsa-miR-4482-5p   |
| CYFIP1 | hsa-miR-1955-5p   |
| CYFIP1 | hsa-miR-760-5p    |
| CYFIP1 | hsa-miR-6933-3p   |
| CYFIP1 | hsa-miR-544-5p    |
| CYFIP1 | hsa-miR-205-5p    |
| CYFIP1 | hsa-miR-3646      |
| CYFIP1 | hsa-miR-7347-3p   |
| CYFIP1 | hsa-miR-879-3p    |
| CYFIP1 | hsa-miR-3921      |
| CYFIP1 | hsa-miR-6739-5p   |
| CYFIP1 | hsa-miR-2682-3p   |
| CYFIP1 | hsa-miR-6842-3p   |
| CYFIP1 | hsa-miR-548a-3p   |
| CYFIP1 | hsa-miR-146a-3p   |
| CYFIP1 | hsa-miR-4680-3p   |
| CYFIP1 | hsa-miR-3190-3p   |
| CYFIP1 | hsa-miR-5187-5p   |



|        |                  |
|--------|------------------|
| CYFIP1 | hsa-miR-3472     |
| CYFIP1 | hsa-miR-192-3p   |
| CYFIP1 | hsa-miR-3110-5p  |
| CYFIP1 | hsa-miR-31-5p    |
| CYFIP1 | hsa-miR-153      |
| CYFIP1 | hsa-miR-741-3p   |
| CYFIP1 | hsa-miR-875-5p   |
| CYFIP1 | hsa-miR-6847-3p  |
| CYFIP1 | hsa-miR-6910-3p  |
| CYFIP1 | hsa-miR-6781-3p  |
| CYFIP1 | hsa-miR-605-3p   |
| CYFIP1 | hsa-miR-6809-5p  |
| CYFIP1 | hsa-miR-5580-3p  |
| CYFIP1 | hsa-miR-7371e-3p |
| CYFIP1 | hsa-miR-6325     |
| CYFIP1 | hsa-miR-3098-3p  |
| CYFIP1 | hsa-miR-3064-5p  |
| CYFIP1 | hsa-miR-5584-5p  |
| CYFIP1 | hsa-miR-7371j-3p |
| CYFIP1 | hsa-miR-6800-5p  |
| CYFIP1 | hsa-miR-1292-5p  |
| CYFIP1 | hsa-miR-296-3p   |
| CYFIP1 | hsa-miR-7386b-3p |
| CYFIP1 | hsa-miR-7202-5p  |
| CYFIP1 | hsa-miR-214-5p   |
| CYFIP1 | hsa-miR-96-5p    |
| CYFIP1 | hsa-miR-199      |
| CYFIP1 | hsa-miR-8802     |
| CYFIP1 | hsa-miR-181b-3p  |
| CYFIP1 | hsa-miR-655-3p   |
| CYFIP1 | hsa-miR-5197-3p  |
| CYFIP1 | hsa-miR-106-5p   |
| CYFIP1 | hsa-miR-3086-5p  |
| CYFIP1 | hsa-miR-193b-5p  |
| CYFIP1 | hsa-miR-8814     |
| CYFIP1 | hsa-miR-6777-5p  |
| CYFIP1 | hsa-miR-582-3p   |
| CYFIP1 | hsa-miR-466l-3p  |
| CYFIP1 | hsa-miR-1258-5p  |
| CYFIP1 | hsa-miR-3119     |
| CYFIP1 | hsa-miR-466q     |
| CYFIP1 | hsa-miR-6735-3p  |
| CYFIP1 | hsa-miR-20-5p    |
| CYFIP1 | hsa-miR-218-2-3p |
| CYFIP1 | hsa-miR-539-5p   |
| CYFIP1 | hsa-miR-148-5p   |

|        |                   |
|--------|-------------------|
| CYFIP1 | hsa-miR-3136-5p   |
| CYFIP1 | hsa-miR-3686      |
| CYFIP1 | hsa-miR-7317-3p   |
| CYFIP1 | hsa-miR-6696-3p   |
| CYFIP1 | hsa-miR-142-5p    |
| CYFIP1 | hsa-miR-3087-3p   |
| CYFIP1 | hsa-miR-7175-5p   |
| CYFIP1 | hsa-miR-1814a     |
| CYFIP1 | hsa-miR-197-5p    |
| CYFIP1 | hsa-miR-1258      |
| CYFIP1 | hsa-miR-432-5p    |
| CYFIP1 | hsa-miR-4436b-3p  |
| CYFIP1 | hsa-miR-3062-5p   |
| CYFIP1 | hsa-miR-686       |
| CYFIP1 | hsa-miR-3200-5p   |
| CYFIP1 | hsa-miR-4493      |
| CYFIP1 | hsa-miR-6973b-5p  |
| CYFIP1 | hsa-miR-133-5p    |
| CYFIP1 | hsa-miR-5006-5p   |
| CYFIP1 | hsa-miR-33-3p     |
| CYFIP1 | hsa-miR-5588-3p   |
| CYFIP1 | hsa-miR-1603      |
| CYFIP1 | hsa-miR-7061-5p   |
| CYFIP1 | hsa-miR-3121-3p   |
| CYFIP1 | hsa-miR-377-5p    |
| CYFIP1 | hsa-miR-6733-5p   |
| CYFIP1 | hsa-miR-1955-3p   |
| CYFIP1 | hsa-miR-7657-5p   |
| CYFIP1 | hsa-miR-291-5p    |
| CYFIP1 | hsa-miR-579       |
| CYFIP1 | hsa-miR-6839-3p   |
| CYFIP1 | hsa-miR-301-3p    |
| CYFIP1 | hsa-miR-502-5p    |
| CYFIP1 | hsa-miR-2399-3p   |
| CYFIP1 | hsa-miR-3076-5p   |
| CYFIP1 | hsa-miR-8801      |
| CYFIP1 | hsa-miR-664a-3p   |
| CYFIP1 | hsa-miR-7106-3p   |
| CYFIP1 | hsa-miR-466l-5p   |
| CYFIP1 | hsa-miR-370       |
| CYFIP1 | hsa-miR-4668-5p   |
| CYFIP1 | hsa-miR-7233-5p   |
| CYFIP1 | hsa-miR-124-5p    |
| CYFIP1 | hsa-miR-20b-3p    |
| CYFIP1 | hsa-miR-680       |
| CYFIP1 | hsa-miR-181b-1-3p |

|        |                   |
|--------|-------------------|
| CYFIP1 | hsa-miR-4743-3p   |
| CYFIP1 | hsa-miR-6821-5p   |
| CYFIP1 | hsa-miR-380-3p    |
| CYFIP1 | hsa-miR-5616-3p   |
| CYFIP1 | hsa-miR-26-3-3p   |
| CYFIP1 | hsa-miR-674-3p    |
| CYFIP1 | hsa-miR-2891      |
| CYFIP1 | hsa-miR-300-3p    |
| CYFIP1 | hsa-miR-6851-5p   |
| CYFIP1 | hsa-miR-5739      |
| CYFIP1 | hsa-miR-23        |
| CYFIP1 | hsa-miR-1909-3p   |
| CYFIP1 | hsa-miR-676-3p    |
| CYFIP1 | hsa-miR-488-5p    |
| CYFIP1 | hsa-miR-3606-3p   |
| CYFIP1 | hsa-miR-548n      |
| CYFIP1 | hsa-miR-344eh-5p  |
| CYFIP1 | hsa-miR-324-3p    |
| CYFIP1 | hsa-miR-201-3p    |
| CYFIP1 | hsa-miR-1227-3p   |
| CYFIP1 | hsa-miR-652-5p    |
| CYFIP1 | hsa-miR-8892      |
| CYFIP1 | hsa-miR-708-5p    |
| CYFIP1 | hsa-miR-4254      |
| CYFIP1 | hsa-miR-6980-5p   |
| CYFIP1 | hsa-miR-7199-3p   |
| CYFIP1 | hsa-miR-3662      |
| CYFIP1 | hsa-miR-2284j     |
| CYFIP1 | hsa-miR-496a-3p.2 |
| CYFIP1 | hsa-miR-6857-3p   |
| CYFIP1 | hsa-miR-586       |
| CYFIP1 | hsa-miR-7183-3p   |
| CYFIP1 | hsa-miR-520f-5p   |
| CYFIP1 | hsa-miR-1288-5p   |
| CYFIP1 | hsa-miR-3572      |
| CYFIP1 | hsa-miR-4466      |
| CYFIP1 | hsa-miR-5706      |
| CYFIP1 | hsa-miR-2285      |
| CYFIP1 | hsa-miR-484       |
| CYFIP1 | hsa-miR-8888      |
| CYFIP1 | hsa-miR-6540-3p   |
| CYFIP1 | hsa-miR-2284m     |
| CYFIP1 | hsa-miR-7090-5p   |
| CYFIP1 | hsa-miR-2371      |
| CYFIP1 | hsa-miR-7064-3p   |
| CYFIP1 | hsa-miR-4677-5p   |

|        |                 |
|--------|-----------------|
| CYFIP1 | hsa-miR-203a-5p |
| CYFIP1 | hsa-miR-3192-5p |
| CYFIP1 | hsa-miR-6316    |
| CYFIP1 | hsa-miR-2312    |
| CYFIP1 | hsa-miR-5582-3p |
| CYFIP1 | hsa-miR-153-3p  |
| CYFIP1 | hsa-miR-488-3p  |
| CYFIP1 | hsa-miR-6884-3p |
| CYFIP1 | hsa-miR-511-5p  |
| CYFIP1 | hsa-miR-3158-5p |
| CYFIP1 | hsa-miR-6529    |
| CYFIP1 | hsa-miR-1306-3p |
| CYFIP1 | hsa-miR-891b    |
| CYFIP1 | hsa-miR-693-3p  |
| CYFIP1 | hsa-miR-4307    |
| CYFIP1 | hsa-miR-184-5p  |
| CYFIP1 | hsa-miR-6728-5p |
| CYFIP1 | hsa-miR-6719-3p |
| CYFIP1 | hsa-miR-195-5p  |
| CYFIP1 | hsa-miR-324-5p  |
| CYFIP1 | hsa-miR-2285h   |
| CYFIP1 | hsa-miR-145-3p  |
| CYFIP1 | hsa-miR-29-5p   |
| CYFIP1 | hsa-miR-6338    |
| CYFIP1 | hsa-miR-377-3p  |
| CYFIP1 | hsa-miR-3064    |
| CYFIP1 | hsa-miR-5125    |
| CYFIP1 | hsa-miR-125a-3p |
| CYFIP1 | hsa-miR-154-5p  |
| CYFIP1 | hsa-miR-7150    |
| CYFIP1 | hsa-miR-4720-3p |
| CYFIP1 | hsa-miR-25-3p   |
| CYFIP1 | hsa-miR-1250    |
| CYFIP1 | hsa-miR-138-5p  |
| CYFIP1 | hsa-miR-2424    |
| CYFIP1 | hsa-miR-214-3p  |
| CYFIP1 | hsa-miR-460a-5p |
| CYFIP1 | hsa-miR-4692    |
| CYFIP1 | hsa-miR-7650-3p |
| CYFIP1 | hsa-miR-661     |
| CYFIP1 | hsa-miR-4752    |
| CYFIP1 | hsa-miR-7025-5p |
| CYFIP1 | hsa-miR-7087-3p |
| CYFIP1 | hsa-miR-8839    |
| CYFIP1 | hsa-miR-8879    |
| CYFIP1 | hsa-miR-2366    |

|        |                  |
|--------|------------------|
| CYFIP1 | hsa-miR-7267-5p  |
| CYFIP1 | hsa-miR-889-5p   |
| CYFIP1 | hsa-miR-3057-5p  |
| CYFIP1 | hsa-miR-7848-3p  |
| CYFIP1 | hsa-miR-3609     |
| CYFIP1 | hsa-miR-449a     |
| CYFIP1 | hsa-miR-4774-5p  |
| CYFIP1 | hsa-miR-125-5p   |
| CYFIP1 | hsa-miR-6697-5p  |
| CYFIP1 | hsa-miR-130b-5p  |
| CYFIP1 | hsa-miR-1178-3p  |
| CYFIP1 | hsa-miR-4673     |
| CYFIP1 | hsa-miR-6991-3p  |
| CYFIP1 | hsa-miR-3922-3p  |
| CYFIP1 | hsa-miR-6083     |
| CYFIP1 | hsa-miR-487-5p   |
| CYFIP1 | hsa-miR-4760-3p  |
| CYFIP1 | hsa-miR-195-5p   |
| CYFIP1 | hsa-miR-331-3p   |
| CYFIP1 | hsa-miR-7160-5p  |
| CYFIP1 | hsa-miR-532-5p   |
| CYFIP1 | hsa-miR-505-3p   |
| CYFIP1 | hsa-miR-519-3p   |
| CYFIP1 | hsa-miR-1643b-5p |
| CYFIP1 | hsa-miR-3553     |
| CYFIP1 | hsa-miR-4650     |
| CYFIP1 | hsa-miR-1283     |
| CYFIP1 | hsa-miR-340-5p   |
| CYFIP1 | hsa-miR-106      |
| CYFIP1 | hsa-miR-371a-5p  |
| CYFIP1 | hsa-miR-6961-5p  |
| CYFIP1 | hsa-miR-6982-3p  |
| CYFIP1 | hsa-miR-2329-5p  |
| CYFIP1 | hsa-miR-155-5p   |
| CYFIP1 | hsa-miR-516a     |
| CYFIP1 | hsa-miR-221-5p   |
| CYFIP1 | hsa-miR-502-5p   |
| CYFIP1 | hsa-miR-3594-3p  |
| CYFIP1 | hsa-miR-629-5p   |
| CYFIP1 | hsa-miR-4650-3p  |
| CYFIP1 | hsa-miR-549-5p   |
| CYFIP1 | hsa-miR-204-5p   |
| CYFIP1 | hsa-miR-15       |
| CYFIP1 | hsa-miR-210-3p   |
| CYFIP1 | hsa-miR-126-3p   |
| CYFIP1 | hsa-miR-3596d    |

|        |                   |
|--------|-------------------|
| CYFIP1 | hsa-miR-1843b-5p  |
| CYFIP1 | hsa-miR-632       |
| CYFIP1 | hsa-miR-548ah-5p  |
| CYFIP1 | hsa-miR-4427      |
| CYFIP1 | hsa-miR-515-5p    |
| CYFIP1 | hsa-miR-8077      |
| CYFIP1 | hsa-miR-350-3p    |
| CYFIP1 | hsa-miR-2479      |
| CYFIP1 | hsa-miR-556-3p    |
| CYFIP1 | hsa-miR-7034-3p   |
| CYFIP1 | hsa-miR-548e-5p   |
| CYFIP1 | hsa-miR-4317      |
| CYFIP1 | hsa-miR-3148      |
| CYFIP1 | hsa-miR-5583-3p   |
| CYFIP1 | hsa-miR-3617-3p   |
| CYFIP1 | hsa-miR-376a-1-5p |
| CYFIP1 | hsa-miR-1814      |
| CYFIP1 | hsa-miR-697       |
| CYFIP1 | hsa-miR-5009-5p   |
| CYFIP1 | hsa-miR-1462-5p   |
| CYFIP1 | hsa-miR-6908-3p   |
| CYFIP1 | hsa-miR-558       |
| CYFIP1 | hsa-miR-7341-5p   |
| CYFIP1 | hsa-miR-7069-5p   |
| CYFIP1 | hsa-miR-7-3p      |
| CYFIP1 | hsa-miR-664       |
| CYFIP1 | hsa-miR-188-5p    |
| CYFIP1 | hsa-miR-581       |
| CYFIP1 | hsa-miR-3674      |
| CYFIP1 | hsa-miR-338-5p    |
| CYFIP1 | hsa-miR-452-3p    |
| CYFIP1 | hsa-miR-5692a     |
| CYFIP1 | hsa-miR-465-5p    |
| CYFIP1 | hsa-miR-2284n     |
| CYFIP1 | hsa-miR-516b-5p   |
| CYFIP1 | hsa-miR-4638-3p   |
| CYFIP1 | hsa-miR-196-1-3p  |
| CYFIP1 | hsa-miR-3944-5p   |
| CYFIP1 | hsa-miR-6791-3p   |
| CYFIP1 | hsa-miR-5193      |
| CYFIP1 | hsa-miR-6727-3p   |
| CYFIP1 | hsa-let-7j-3p     |
| CYFIP1 | hsa-miR-3473c     |
| CYFIP1 | hsa-miR-10a-3p    |
| CYFIP1 | hsa-miR-4303      |
| CYFIP1 | hsa-miR-570-3p    |

|        |                   |
|--------|-------------------|
| CYFIP1 | hsa-miR-494-5p    |
| CYFIP1 | hsa-miR-151       |
| CYFIP1 | hsa-miR-2352      |
| CYFIP1 | hsa-miR-188-5p    |
| CYFIP1 | hsa-miR-374b-5p   |
| CYFIP1 | hsa-miR-5694      |
| CYFIP1 | hsa-miR-335-3p    |
| CYFIP1 | hsa-miR-2472      |
| CYFIP1 | hsa-miR-5003-3p   |
| CYFIP1 | hsa-miR-1897-5p   |
| CYFIP1 | hsa-miR-7859      |
| CYFIP1 | hsa-miR-7373c-3p  |
| CYFIP1 | hsa-miR-374       |
| CYFIP1 | hsa-miR-548ai     |
| CYFIP1 | hsa-miR-519d-5p   |
| CYFIP1 | hsa-miR-26-5p     |
| CYFIP1 | hsa-miR-7262a-5p  |
| CYFIP1 | hsa-miR-1584-3p   |
| CYFIP1 | hsa-miR-509-5p    |
| CYFIP1 | hsa-miR-4645-5p   |
| CYFIP1 | hsa-miR-376b-3p   |
| CYFIP1 | hsa-miR-4642      |
| CYFIP1 | hsa-miR-6815-3p   |
| CYFIP1 | hsa-miR-4724-3p   |
| CYFIP1 | hsa-miR-32-5p     |
| CYFIP1 | hsa-miR-3593-5p   |
| CYFIP1 | hsa-miR-154-3p    |
| CYFIP1 | hsa-miR-674-5p    |
| CYFIP1 | hsa-miR-548an     |
| CYFIP1 | hsa-miR-3969      |
| CYFIP1 | hsa-miR-3153      |
| CYFIP1 | hsa-miR-7043-5p   |
| CYFIP1 | hsa-miR-651-5p    |
| CYFIP1 | hsa-miR-7033-5p   |
| CYFIP1 | hsa-miR-669p-3p   |
| CYFIP1 | hsa-miR-4505      |
| CYFIP1 | hsa-miR-4640-5p   |
| CYFIP1 | hsa-miR-5683      |
| CYFIP1 | hsa-miR-6992-3p   |
| CYFIP1 | hsa-miR-4738-5p   |
| CYFIP1 | hsa-miR-892b      |
| CYFIP1 | hsa-miR-181b-2-3p |
| CYFIP1 | hsa-miR-330-5p    |
| CYFIP1 | hsa-miR-8810      |
| CYFIP1 | hsa-miR-6768-3p   |
| CYFIP1 | hsa-miR-6783-5p   |

|        |                   |
|--------|-------------------|
| CYFIP1 | hsa-miR-20        |
| CYFIP1 | hsa-miR-1247-3p   |
| CYFIP1 | hsa-miR-144-3p    |
| CYFIP1 | hsa-miR-4428      |
| CYFIP1 | hsa-miR-6508-3p   |
| CYFIP1 | hsa-miR-6879-5p   |
| CYFIP1 | hsa-miR-690       |
| CYFIP1 | hsa-miR-4430      |
| CYFIP1 | hsa-miR-883a-5p   |
| CYFIP1 | hsa-miR-6948-5p   |
| CYFIP1 | hsa-miR-881-3p    |
| CYFIP1 | hsa-miR-5584-3p   |
| CYFIP1 | hsa-miR-153-5p    |
| CYFIP1 | hsa-miR-4756-3p   |
| CYFIP1 | hsa-miR-7g-3p     |
| CYFIP1 | hsa-miR-335-5p    |
| CYFIP1 | hsa-miR-3113-5p   |
| CYFIP1 | hsa-miR-6830-5p   |
| CYFIP1 | hsa-miR-6378      |
| CYFIP1 | hsa-miR-548b-3p   |
| CYFIP1 | hsa-miR-669i      |
| CYFIP1 | hsa-miR-1544b-5p  |
| CYFIP1 | hsa-miR-133       |
| CYFIP1 | hsa-miR-1771      |
| CYFIP1 | hsa-miR-4286      |
| CYFIP1 | hsa-miR-7271-3p   |
| CYFIP1 | hsa-miR-15a-3p    |
| CYFIP1 | hsa-miR-6529-3p   |
| DCP2   | hsa-miR-548b-3p   |
| DCP2   | hsa-miR-2485      |
| DCP2   | hsa-miR-5001-3p   |
| DCP2   | hsa-miR-302b-5p   |
| DCP2   | hsa-miR-2458      |
| DCP2   | hsa-miR-7385c-3p  |
| DCP2   | hsa-miR-7030-3p   |
| DCP2   | hsa-miR-335-5p    |
| DCP2   | hsa-miR-222-5p    |
| DCP2   | hsa-miR-6357      |
| DCP2   | hsa-miR-8900      |
| DCP2   | hsa-miR-2410      |
| DCP2   | hsa-miR-1188-3p   |
| DCP2   | hsa-miR-125b-2-3p |
| DCP2   | hsa-miR-150-5p    |
| DCP2   | hsa-miR-5615-5p   |
| DCP2   | hsa-let-7g-3p     |
| DCP2   | hsa-miR-3921      |



|      |                   |
|------|-------------------|
| DCP2 | hsa-miR-541-3p    |
| DCP2 | hsa-miR-6720-5p   |
| DCP2 | hsa-miR-3084bc-5p |
| DCP2 | hsa-miR-7211-5p   |
| DCP2 | hsa-miR-30e-5p    |
| DCP2 | hsa-miR-29b-2-5p  |
| DCP2 | hsa-miR-3082-3p   |
| DCP2 | hsa-miR-1302      |
| DCP2 | hsa-miR-335-5p    |
| DCP2 | hsa-miR-3166      |
| DCP2 | hsa-miR-4299      |
| DCP2 | hsa-miR-3106-5p   |
| DCP2 | hsa-miR-135b-5p   |
| DCP2 | hsa-miR-7337-5p   |
| DCP2 | hsa-miR-183-5p.1  |
| DCP2 | hsa-miR-2894      |
| DCP2 | hsa-miR-467f      |
| DCP2 | hsa-miR-7226-3p   |
| DCP2 | hsa-miR-513a      |
| DCP2 | hsa-miR-5197-5p   |
| DCP2 | hsa-miR-548c-3p   |
| DCP2 | hsa-miR-8799      |
| DCP2 | hsa-miR-514a-3p   |
| DCP2 | hsa-miR-7324-5p   |
| DCP2 | hsa-miR-6799-5p   |
| DCP2 | hsa-miR-7221-5p   |
| DCP2 | hsa-miR-581       |
| DCP2 | hsa-miR-1233-5p   |
| DCP2 | hsa-miR-365-3p    |
| DCP2 | hsa-miR-579-3p    |
| DCP2 | hsa-miR-6769b-5p  |
| DCP2 | hsa-miR-6882-5p   |
| DCP2 | hsa-miR-6529-3p   |
| DCP2 | hsa-miR-371b-5p   |
| DCP2 | hsa-miR-8823      |
| DCP2 | hsa-miR-6215      |
| DCP2 | hsa-miR-5046      |
| DCP2 | hsa-miR-4731-5p   |
| DCP2 | hsa-miR-1468-3p   |
| DCP2 | hsa-miR-4313      |
| DCP2 | hsa-miR-591       |
| DCP2 | hsa-let-7-5p      |
| DCP2 | hsa-miR-671-5p    |
| DCP2 | hsa-miR-216b-5p   |
| DCP2 | hsa-miR-129b-3p   |
| DCP2 | hsa-miR-6165      |

|      |                   |
|------|-------------------|
| DCP2 | hsa-miR-7056-5p   |
| DCP2 | hsa-miR-431-5p    |
| DCP2 | hsa-miR-4769-5p   |
| DCP2 | hsa-miR-6831-5p   |
| DCP2 | hsa-miR-599-5p    |
| DCP2 | hsa-miR-2895      |
| DCP2 | hsa-miR-5571-5p   |
| DCP2 | hsa-miR-7080-5p   |
| DCP2 | hsa-miR-4421      |
| DCP2 | hsa-miR-709       |
| DCP2 | hsa-miR-6509-3p   |
| DCP2 | hsa-miR-133b-5p   |
| DCP2 | hsa-miR-3662      |
| DCP2 | hsa-miR-1933-3p   |
| DCP2 | hsa-miR-7377-5p   |
| DCP2 | hsa-miR-7229-3p   |
| DCP2 | hsa-miR-3059-5p   |
| DCP2 | hsa-miR-466bcp-3p |
| DCP2 | hsa-miR-1894-5p   |
| DCP2 | hsa-miR-6959-3p   |
| DCP2 | hsa-miR-32-5p     |
| DCP2 | hsa-miR-487a-3p   |
| DCP2 | hsa-miR-1243-5p   |
| DCP2 | hsa-miR-6971-3p   |
| DCP2 | hsa-miR-3145-3p   |
| DCP2 | hsa-miR-489-3p    |
| DCP2 | hsa-miR-513a-5p   |
| DCP2 | hsa-miR-7317-5p   |
| DCP2 | hsa-miR-1540-5p   |
| DCP2 | hsa-miR-5582-3p   |
| DCP2 | hsa-miR-2887      |
| DCP2 | hsa-miR-548as-5p  |
| DCP2 | hsa-miR-4704-5p   |
| DCP2 | hsa-miR-4518      |
| DCP2 | hsa-miR-7656-3p   |
| DCP2 | hsa-miR-7262a-5p  |
| DCP2 | hsa-miR-2372      |
| DCP2 | hsa-miR-3085-5p   |
| DCP2 | hsa-miR-6740-3p   |
| DCP2 | hsa-miR-3575      |
| DCP2 | hsa-miR-5703      |
| DCP2 | hsa-miR-466n-3p   |
| DCP2 | hsa-miR-3663-5p   |
| DCP2 | hsa-miR-631       |
| DCP2 | hsa-miR-561-3p    |
| DCP2 | hsa-miR-7332-3p   |

|      |                   |
|------|-------------------|
| DCP2 | hsa-miR-3682-5p   |
| DCP2 | hsa-miR-8833      |
| DCP2 | hsa-miR-7681-5p   |
| DCP2 | hsa-miR-4469      |
| DCP2 | hsa-miR-122-5p    |
| DCP2 | hsa-miR-596       |
| DCP2 | hsa-miR-30        |
| DCP2 | hsa-miR-15a-3p    |
| DCP2 | hsa-miR-548ap-3p  |
| DCP2 | hsa-miR-543       |
| DCP2 | hsa-miR-6943-3p   |
| DCP2 | hsa-miR-3119      |
| DCP2 | hsa-miR-7296-5p   |
| DCP2 | hsa-miR-5694      |
| DCP2 | hsa-miR-466mo-3p  |
| DCP2 | hsa-miR-6890-3p   |
| DCP2 | hsa-miR-1584-3p   |
| DCP2 | hsa-miR-132-3p    |
| DCP2 | hsa-miR-7168-5p   |
| DCP2 | hsa-miR-2326      |
| DCP2 | hsa-miR-8871      |
| DCP2 | hsa-miR-880-3p    |
| DCP2 | hsa-miR-208a-3p   |
| DCP2 | hsa-miR-515-5p    |
| DCP2 | hsa-miR-5107-3p   |
| DCP2 | hsa-miR-101b-3p.1 |
| DCP2 | hsa-miR-2464-5p   |
| DCP2 | hsa-miR-101a-3p.2 |
| DCP2 | hsa-miR-7388a-3p  |
| DCP2 | hsa-miR-7216-3p   |
| DCP2 | hsa-miR-7368-3p   |
| DCP2 | hsa-miR-6992-3p   |
| DCP2 | hsa-miR-6827-3p   |
| DCP2 | hsa-miR-7257-5p   |
| DCP2 | hsa-miR-4727-3p   |
| DCP2 | hsa-miR-5107-5p   |
| DCP2 | hsa-miR-411-5p.2  |
| DCP2 | hsa-miR-2325b     |
| DCP2 | hsa-miR-548aef    |
| DCP2 | hsa-miR-181b-2-3p |
| DCP2 | hsa-miR-7196-5p   |
| DCP2 | hsa-miR-3093-5p   |
| DCP2 | hsa-miR-6835-3p   |
| DCP2 | hsa-miR-18-3p     |
| DCP2 | hsa-miR-5000-3p   |
| DCP2 | hsa-miR-1268b     |

|      |                  |
|------|------------------|
| DCP2 | hsa-miR-522-3p   |
| DCP2 | hsa-miR-15b-3p   |
| DCP2 | hsa-miR-6237     |
| DCP2 | hsa-miR-6983-3p  |
| DCP2 | hsa-miR-624-3p   |
| DCP2 | hsa-miR-381-3p   |
| DCP2 | hsa-miR-3170     |
| DCP2 | hsa-miR-519d-5p  |
| DCP2 | hsa-miR-548at-3p |
| DCP2 | hsa-miR-7651-3p  |
| DCP2 | hsa-miR-183-5p.2 |
| DCP2 | hsa-miR-6904-3p  |
| DCP2 | hsa-miR-8801     |
| DCP2 | hsa-miR-7021-3p  |
| DCP2 | hsa-miR-1747-3p  |
| DCP2 | hsa-miR-767-3p   |
| DCP2 | hsa-miR-153      |
| DCP2 | hsa-miR-542      |
| DCP2 | hsa-miR-6900-5p  |
| DCP2 | hsa-miR-548k     |
| DCP2 | hsa-miR-324-5p   |
| DCP2 | hsa-miR-1930-3p  |
| DCP2 | hsa-miR-4722-3p  |
| DCP2 | hsa-miR-218-2-3p |
| DCP2 | hsa-miR-7222-5p  |
| DCP2 | hsa-miR-146      |
| DCP2 | hsa-miR-30b-5p   |
| DCP2 | hsa-miR-5112     |
| DCP2 | hsa-miR-2384     |
| DCP2 | hsa-miR-883ab-3p |
| DCP2 | hsa-miR-605      |
| DCP2 | hsa-miR-7283-3p  |
| DCP2 | hsa-miR-344f-5p  |
| DCP2 | hsa-miR-512      |
| DCP2 | hsa-miR-2285j    |
| DCP2 | hsa-miR-5004-5p  |
| DCP2 | hsa-miR-371a-5p  |
| DCP2 | hsa-miR-548ab    |
| DCP2 | hsa-miR-2428     |
| DCP2 | hsa-miR-200-3p   |
| DCP2 | hsa-miR-548aq-5p |
| DCP2 | hsa-miR-7216-5p  |
| DCP2 | hsa-miR-449a     |
| DCP2 | hsa-miR-6365     |
| DCP2 | hsa-miR-1-3p     |
| DCP2 | hsa-miR-2681-5p  |

|      |                   |
|------|-------------------|
| DCP2 | hsa-miR-7273-3p   |
| DCP2 | hsa-miR-3192-3p   |
| DCP2 | hsa-miR-548cej-3p |
| DCP2 | hsa-miR-2483-3p   |
| DCP2 | hsa-miR-561-5p    |
| DCP2 | hsa-miR-3963      |
| DCP2 | hsa-miR-548g-3p   |
| DCP2 | hsa-miR-2333      |
| DCP2 | hsa-miR-514a-5p   |
| DCP2 | hsa-miR-510-3p    |
| DCP2 | hsa-miR-744-3p    |
| DCP2 | hsa-miR-3113-5p   |
| DCP2 | hsa-miR-16-5p     |
| DCP2 | hsa-miR-129b-5p   |
| DCP2 | hsa-miR-5104      |
| DCP2 | hsa-miR-6320      |
| DCP2 | hsa-miR-411-5p    |
| DCP2 | hsa-miR-6980-3p   |
| DCP2 | hsa-miR-133       |
| DCP2 | hsa-miR-4723-5p   |
| DCP2 | hsa-miR-500b-3p   |
| DCP2 | hsa-miR-548av-5p  |
| DCP2 | hsa-miR-132-3p    |
| DCP2 | hsa-miR-217       |
| DCP2 | hsa-miR-7029-3p   |
| DCP2 | hsa-miR-499b-5p   |
| DCP2 | hsa-miR-7315-5p   |
| DCP2 | hsa-miR-186-5p    |
| DCP2 | hsa-miR-421-3p    |
| DCP2 | hsa-miR-460a-5p   |
| DCP2 | hsa-miR-6872-3p   |
| DCP2 | hsa-miR-1252      |
| DCP2 | hsa-miR-7678-3p   |
| DCP2 | hsa-miR-693-3p    |
| DCP2 | hsa-miR-10-5p     |
| DCP2 | hsa-miR-584-5p    |
| DCP2 | hsa-miR-1243      |
| DCP2 | hsa-miR-8810      |
| DCP2 | hsa-miR-7251-3p   |
| DCP2 | hsa-miR-154-3p    |
| DCP2 | hsa-miR-944       |
| DCP2 | hsa-miR-4666a-3p  |
| DCP2 | hsa-miR-320a      |
| DCP2 | hsa-miR-138-3p    |
| DCP2 | hsa-miR-669p-3p   |
| DCP2 | hsa-miR-7199-3p   |

|      |                   |
|------|-------------------|
| DCP2 | hsa-miR-494-5p    |
| DCP2 | hsa-miR-570-3p    |
| DCP2 | hsa-miR-4796-5p   |
| DCP2 | hsa-miR-642a-5p   |
| DCP2 | hsa-miR-3664-3p   |
| DCP2 | hsa-miR-5004-3p   |
| DCP2 | hsa-miR-599       |
| DCP2 | hsa-miR-4424      |
| DCP2 | hsa-miR-517-5p    |
| DCP2 | hsa-miR-203a-3p.1 |
| DCP2 | hsa-miR-2483      |
| DCP2 | hsa-miR-2116-3p   |
| DCP2 | hsa-miR-7114-5p   |
| DCP2 | hsa-miR-3085-3p   |
| DCP2 | hsa-miR-10a-3p    |
| DCP2 | hsa-miR-7454-5p   |
| DCP2 | hsa-miR-597-3p    |
| DCP2 | hsa-miR-4430      |
| DCP2 | hsa-miR-513c-5p   |
| DCP2 | hsa-miR-3622b-3p  |
| DCP2 | hsa-miR-7227-5p   |
| DCP2 | hsa-miR-381-3p    |
| DCP2 | hsa-miR-4752      |
| DCP2 | hsa-miR-200bc-3p  |
| DCP2 | hsa-miR-7856-5p   |
| DCP2 | hsa-miR-4703-5p   |
| DCP2 | hsa-miR-1299      |
| DCP2 | hsa-miR-3909      |
| DCP2 | hsa-miR-5588-3p   |
| DCP2 | hsa-miR-1245-3p   |
| DCP2 | hsa-miR-3097-5p   |
| DCP2 | hsa-miR-7030-5p   |
| DCP2 | hsa-miR-4459      |
| DCP2 | hsa-miR-629-3p    |
| DCP2 | hsa-miR-610       |
| DCP2 | hsa-miR-1904      |
| DCP2 | hsa-miR-672-3p    |
| DCP2 | hsa-miR-7061-5p   |
| DCP2 | hsa-miR-654-5p    |
| DCP2 | hsa-miR-3590-3p   |
| DCP2 | hsa-miR-4270      |
| DCP2 | hsa-miR-7194-5p   |
| DCP2 | hsa-miR-2329-5p   |
| DCP2 | hsa-miR-7374a-3p  |
| DCP2 | hsa-miR-3150b-5p  |
| DCP2 | hsa-miR-4517      |

|      |                  |
|------|------------------|
| DCP2 | hsa-miR-33a-3p   |
| DCP2 | hsa-miR-4659b-5p |
| DCP2 | hsa-miR-6973a-3p |
| DCP2 | hsa-miR-4457     |
| DCP2 | hsa-miR-6531     |
| DCP2 | hsa-miR-194-2-3p |
| DCP2 | hsa-miR-6998-5p  |
| DCP2 | hsa-miR-889-3p   |
| DCP2 | hsa-miR-362-3p   |
| DCP2 | hsa-miR-6949-5p  |
| DCP2 | hsa-miR-1545a-3p |
| DCP2 | hsa-miR-876-5p   |
| DCP2 | hsa-miR-550-3p   |
| DCP2 | hsa-miR-3470b    |
| DCP2 | hsa-miR-513b-5p  |
| DCP2 | hsa-miR-4463     |
| DCP2 | hsa-miR-7046-3p  |
| DCP2 | hsa-miR-6131     |
| DCP2 | hsa-miR-668-3p   |
| DCP2 | hsa-miR-497-5p   |
| DCP2 | hsa-miR-326-5p   |
| DCP2 | hsa-miR-6407     |
| DCP2 | hsa-miR-194-5p   |
| DCP2 | hsa-miR-103      |
| DCP2 | hsa-miR-656      |
| DCP2 | hsa-miR-500b-5p  |
| DCP2 | hsa-miR-2393     |
| DCP2 | hsa-miR-2355-3p  |
| DCP2 | hsa-miR-7033-3p  |
| DCP2 | hsa-miR-6835-5p  |
| DCP2 | hsa-miR-6920-5p  |
| DCP2 | hsa-miR-708-5p   |
| DCP2 | hsa-miR-7022-5p  |
| DCP2 | hsa-miR-700-5p   |
| DCP2 | hsa-miR-7296-3p  |
| DCP2 | hsa-miR-217-3p   |
| DCP2 | hsa-miR-1255     |
| DCP2 | hsa-miR-4495     |
| DCP2 | hsa-miR-378      |
| DCP2 | hsa-miR-219-1-3p |
| DCP2 | hsa-miR-877-3p   |
| DCP2 | hsa-miR-195-5p   |
| DCP2 | hsa-miR-6803-5p  |
| DCP2 | hsa-miR-7337-3p  |
| DCP2 | hsa-miR-219c-3p  |
| DCP2 | hsa-miR-548aa    |

|      |                  |
|------|------------------|
| DCP2 | hsa-let-7f-2-3p  |
| DCP2 | hsa-miR-2322-3p  |
| DCP2 | hsa-miR-3475-5p  |
| DCP2 | hsa-miR-6941-5p  |
| DCP2 | hsa-miR-7023-5p  |
| DCP2 | hsa-miR-124      |
| DCP2 | hsa-miR-1416-3p  |
| DCP2 | hsa-miR-6836-5p  |
| DCP2 | hsa-miR-1225-5p  |
| DCP2 | hsa-miR-7260-3p  |
| DCP2 | hsa-miR-5007-5p  |
| DCP2 | hsa-miR-677-5p   |
| DCP2 | hsa-miR-5096     |
| DCP2 | hsa-miR-1911-5p  |
| DCP2 | hsa-miR-2285ad   |
| DCP2 | hsa-miR-514a-3p  |
| DCP2 | hsa-miR-342-3p   |
| DCP2 | hsa-miR-7074-3p  |
| DCP2 | hsa-miR-4764-3p  |
| DCP2 | hsa-miR-5120     |
| DCP2 | hsa-miR-25-3p    |
| DCP2 | hsa-miR-7378-3p  |
| DCP2 | hsa-miR-4691-5p  |
| DCP2 | hsa-miR-216-5p   |
| DCP2 | hsa-miR-7244-5p  |
| DCP2 | hsa-miR-216a     |
| DCP2 | hsa-miR-1262-5p  |
| DCP2 | hsa-miR-1-2-5p   |
| DCP2 | hsa-miR-10       |
| DCP2 | hsa-miR-6814-5p  |
| DCP2 | hsa-miR-559      |
| DCP2 | hsa-miR-544-3p   |
| DCP2 | hsa-miR-7350-3p  |
| DCP2 | hsa-miR-891-3p   |
| DCP2 | hsa-miR-4774-3p  |
| DCP2 | hsa-miR-7647-5p  |
| DCP2 | hsa-miR-7246-3p  |
| DCP2 | hsa-miR-1248     |
| DCP2 | hsa-miR-8901     |
| DCP2 | hsa-miR-219-2-3p |
| DCP2 | hsa-miR-487-5p   |
| DCP2 | hsa-miR-6715a-3p |
| DCP2 | hsa-miR-3550     |
| DCP2 | hsa-miR-183-3p   |
| DCP2 | hsa-miR-369-3p   |
| DCP2 | hsa-miR-548m     |



|      |                  |
|------|------------------|
| DCP2 | hsa-miR-4533     |
| DCP2 | hsa-miR-4288     |
| DCP2 | hsa-miR-2337     |
| DCP2 | hsa-miR-6120-3p  |
| DCP2 | hsa-miR-548ag    |
| DCP2 | hsa-miR-383-5p   |
| DCP2 | hsa-miR-92       |
| DCP2 | hsa-miR-122-3p   |
| DCP2 | hsa-miR-4650     |
| DCP2 | hsa-miR-8824     |
| DCP2 | hsa-miR-7164-5p  |
| DCP2 | hsa-miR-3618     |
| DCP2 | hsa-miR-883b-5p  |
| DCP2 | hsa-miR-4724-5p  |
| DCP2 | hsa-miR-508-5p   |
| DCP2 | hsa-miR-1968-5p  |
| DCP2 | hsa-miR-490-5p   |
| DCP2 | hsa-miR-5695     |
| DCP2 | hsa-miR-148-3p   |
| DCP2 | hsa-miR-7373d-3p |
| DCP2 | hsa-miR-888-3p   |
| DCP2 | hsa-miR-2284ab   |
| DCP2 | hsa-miR-202-3p   |
| DCP2 | hsa-miR-764      |
| DCP2 | hsa-miR-675-3p   |
| DCP2 | hsa-miR-1266-5p  |
| DCP2 | hsa-miR-519      |
| DCP2 | hsa-miR-7977     |
| DCP2 | hsa-miR-1253     |
| DCP2 | hsa-miR-548x-3p  |
| DCP2 | hsa-miR-4273     |
| DCP2 | hsa-miR-2285m    |
| DCP2 | hsa-miR-95-5p    |
| DCP2 | hsa-miR-144-3p   |
| DCP2 | hsa-miR-379-3p   |
| DCP2 | hsa-miR-6952-3p  |
| DCP2 | hsa-miR-1911-3p  |
| DCP2 | hsa-miR-4775     |
| DCP2 | hsa-miR-7068-5p  |
| DCP2 | hsa-miR-2484     |
| DCP2 | hsa-miR-7387-5p  |
| DCP2 | hsa-miR-2330-3p  |
| DCP2 | hsa-miR-4639-3p  |
| DCP2 | hsa-miR-8887     |
| DCP2 | hsa-miR-7272-3p  |
| DCP2 | hsa-miR-7398m-3p |

|      |                   |
|------|-------------------|
| DCP2 | hsa-miR-4722-5p   |
| DCP2 | hsa-miR-548aj-3p  |
| DCP2 | hsa-miR-692       |
| DCP2 | hsa-miR-199-3p    |
| DCP2 | hsa-miR-7660-5p   |
| DCP2 | hsa-miR-2367-3p   |
| DCP2 | hsa-miR-1233-3p   |
| DCP2 | hsa-miR-6748-3p   |
| DCP2 | hsa-miR-8085      |
| DCP2 | hsa-miR-7a-1-3p   |
| DCP2 | hsa-miR-1235      |
| DCP2 | hsa-miR-2370-5p   |
| DCP2 | hsa-miR-4303      |
| DCP2 | hsa-miR-7338-5p   |
| DCP2 | hsa-miR-2957      |
| DCP2 | hsa-miR-6719-3p   |
| DCP2 | hsa-miR-301a-3p   |
| DCP2 | hsa-miR-491-5p    |
| DCP2 | hsa-miR-3593-5p   |
| DCP2 | hsa-miR-29e       |
| DCP2 | hsa-miR-30-3p     |
| DCP2 | hsa-miR-3061-5p   |
| DCP2 | hsa-miR-190-5p    |
| DCP2 | hsa-miR-2439-3p   |
| DCP2 | hsa-miR-2285d     |
| DCP2 | hsa-miR-7361-5p   |
| DCP2 | hsa-miR-518e-3p   |
| DCP2 | hsa-miR-376c-3p   |
| DCP2 | hsa-miR-7178-3p   |
| DCP2 | hsa-miR-503-3p    |
| DCP2 | hsa-miR-29-3p     |
| DCP2 | hsa-miR-330-3p    |
| DCP2 | hsa-miR-7351-3p   |
| DCP2 | hsa-miR-7331-1-3p |
| DCP2 | hsa-miR-1301-5p   |
| DCP2 | hsa-miR-4282      |
| DCP2 | hsa-miR-454       |
| DCP2 | hsa-miR-6358      |
| DCP2 | hsa-miR-186-3p    |
| DCP2 | hsa-miR-7224-3p   |
| DCP2 | hsa-miR-2325      |
| DCP2 | hsa-miR-219a-2-3p |
| DCP2 | hsa-miR-7256-5p   |
| DCP2 | hsa-miR-27-3p     |
| DCP2 | hsa-miR-2399-3p   |
| DCP2 | hsa-miR-4714-5p   |

|      |                   |
|------|-------------------|
| DCP2 | hsa-miR-140-3p.2  |
| DCP2 | hsa-miR-1197-5p   |
| DCP2 | hsa-miR-6081      |
| DCP2 | hsa-miR-6738-3p   |
| DCP2 | hsa-miR-125-5p    |
| DCP2 | hsa-miR-743ab-3p  |
| DCP2 | hsa-miR-3109-3p   |
| DCP2 | hsa-miR-4456      |
| DCP2 | hsa-miR-18b-3p    |
| DCP2 | hsa-miR-574-5p    |
| DCP2 | hsa-miR-5619-3p   |
| DCP2 | hsa-miR-7683-3p   |
| DCP2 | hsa-miR-1964-5p   |
| DCP2 | hsa-miR-4531      |
| DCP2 | hsa-miR-134-3p    |
| DCP2 | hsa-miR-6973b-3p  |
| DCP2 | hsa-miR-6804-3p   |
| DCP2 | hsa-miR-7215-5p   |
| DCP2 | hsa-miR-467a-5p   |
| DCP2 | hsa-miR-19a-5p    |
| DCP2 | hsa-miR-2489      |
| DCP2 | hsa-miR-4524b-3p  |
| DCP2 | hsa-miR-7094-1-5p |
| DCP2 | hsa-miR-741-3p    |
| DCP2 | hsa-miR-4781-3p   |
| DCP2 | hsa-miR-872-5p    |
| DCP2 | hsa-miR-1285-3p   |
| DCP2 | hsa-miR-2303      |
| DCP2 | hsa-miR-3164      |
| DCP2 | hsa-miR-6074      |
| DCP2 | hsa-miR-5581-5p   |
| DCP2 | hsa-miR-3192      |
| DCP2 | hsa-miR-7344-3p   |
| DCP2 | hsa-miR-493-3p    |
| DCP2 | hsa-miR-496-3p    |
| DCP2 | hsa-miR-449c-3p   |
| DCP2 | hsa-miR-3099-3p   |
| DCP2 | hsa-miR-877-5p    |
| DCP2 | hsa-miR-374a-5p   |
| DCP2 | hsa-miR-7033-5p   |
| DCP2 | hsa-miR-1191a     |
| DCP2 | hsa-miR-1285-3p   |
| DCP2 | hsa-miR-6949-3p   |
| DCP2 | hsa-miR-7975      |
| DCP2 | hsa-miR-2285x     |
| DCP2 | hsa-miR-548a-3p   |

|      |                  |
|------|------------------|
| DCP2 | hsa-miR-3916     |
| DCP2 | hsa-miR-362-5p   |
| DCP2 | hsa-miR-7353-3p  |
| DCP2 | hsa-miR-4330     |
| DCP2 | hsa-miR-3927-3p  |
| DCP2 | hsa-miR-6133     |
| DCP2 | hsa-miR-4419a    |
| DCP2 | hsa-miR-665-3p   |
| DCP2 | hsa-miR-7084-3p  |
| DCP2 | hsa-miR-3544-3p  |
| DCP2 | hsa-miR-4510     |
| DCP2 | hsa-miR-6355     |
| DCP2 | hsa-miR-6816-3p  |
| DCP2 | hsa-miR-3135b    |
| DCP2 | hsa-miR-6920-3p  |
| DCP2 | hsa-miR-365b-3p  |
| DCP2 | hsa-miR-548am-3p |
| DCP2 | hsa-miR-7076-5p  |
| DCP2 | hsa-miR-7179-3p  |
| DCP2 | hsa-miR-2284n    |
| DCP2 | hsa-miR-6086     |
| DCP2 | hsa-miR-7189-3p  |
| DCP2 | hsa-miR-548aq-3p |
| DCP2 | hsa-miR-519-5p   |
| DCP2 | hsa-miR-7g-3p    |
| DCP2 | hsa-miR-5704     |
| DCP2 | hsa-miR-660-3p   |
| DCP2 | hsa-miR-6800-3p  |
| DCP2 | hsa-miR-7398l-3p |
| DCP2 | hsa-miR-6509-5p  |
| DCP2 | hsa-miR-2285g    |
| DCP2 | hsa-miR-4428     |
| DCP2 | hsa-miR-7034-3p  |
| DCP2 | hsa-miR-485-5p   |
| DCP2 | hsa-miR-6893-5p  |
| DCP2 | hsa-miR-7649-5p  |
| DCP2 | hsa-miR-934-3p   |
| DCP2 | hsa-miR-7066-3p  |
| DCP2 | hsa-miR-5699-3p  |
| DCP2 | hsa-miR-7328-3p  |
| DCP2 | hsa-miR-8848     |
| DCP2 | hsa-miR-4779     |
| DCP2 | hsa-miR-325-5p   |
| DCP2 | hsa-miR-7266-5p  |
| DCP2 | hsa-miR-3918     |
| DCP2 | hsa-miR-155-3p   |

|      |                    |
|------|--------------------|
| DCP2 | hsa-miR-1283       |
| DCP2 | hsa-miR-5134-5p    |
| DCP2 | hsa-miR-874        |
| DCP2 | hsa-miR-3576       |
| DCP2 | hsa-miR-5681b      |
| DCP2 | hsa-miR-6849-3p    |
| DCP2 | hsa-miR-1976       |
| DCP2 | hsa-miR-3136-5p    |
| DCP2 | hsa-miR-6947-5p    |
| DCP2 | hsa-miR-7013-3p    |
| DCP2 | hsa-miR-3583-3p    |
| DCP2 | hsa-miR-466i-3p    |
| DCP2 | hsa-miR-96-5p      |
| DCP2 | hsa-miR-590-3p     |
| DCP2 | hsa-miR-548p       |
| DCP2 | hsa-miR-1545b-3-3p |
| DCP2 | hsa-miR-8067       |
| DCP2 | hsa-miR-4537       |
| DCP2 | hsa-miR-3646       |
| DCP2 | hsa-miR-7398s-3p   |
| DCP2 | hsa-miR-302bd      |
| DCP2 | hsa-miR-934        |
| DCP2 | hsa-miR-24-3p      |
| DCP2 | hsa-miR-669c-3p    |
| DCP2 | hsa-miR-455-3p.1   |
| DCP2 | hsa-miR-6868-3p    |
| DCP2 | hsa-miR-6722-5p    |
| DCP2 | hsa-miR-6371       |
| DCP2 | hsa-miR-659-3p     |
| DCP2 | hsa-miR-30a-3p     |
| DCP2 | hsa-miR-4762-5p    |
| DCP2 | hsa-miR-885-5p     |
| DCP2 | hsa-miR-4327       |
| DCP2 | hsa-miR-642-3p     |
| DCP2 | hsa-miR-3082-5p    |
| DCP2 | hsa-miR-345-5p     |
| DCP2 | hsa-miR-544a       |
| DCP2 | hsa-miR-3552       |
| DCP2 | hsa-miR-7649-3p    |
| DCP2 | hsa-miR-6964-3p    |
| DCP2 | hsa-miR-3066-5p    |
| DCP2 | hsa-miR-3924       |
| DCP2 | hsa-miR-2370-3p    |
| DCP2 | hsa-miR-300-5p     |
| DCP2 | hsa-miR-499a-3p    |
| DCP2 | hsa-miR-7299-5p    |

|      |                    |
|------|--------------------|
| DCP2 | hsa-miR-548ay-3p   |
| DCP2 | hsa-miR-7330-5p    |
| DCP2 | hsa-miR-184-3p     |
| DCP2 | hsa-miR-4648       |
| DCP2 | hsa-miR-683        |
| DCP2 | hsa-miR-7386a-3-3p |
| DCP2 | hsa-miR-4672       |
| DCP2 | hsa-miR-373-3p     |
| DCP2 | hsa-miR-221-3p     |
| DCP2 | hsa-miR-7073-5p    |
| DCP2 | hsa-miR-6758-3p    |
| DCP2 | hsa-let-7abf-3p    |
| DCP2 | hsa-miR-3936       |
| DCP2 | hsa-miR-8844       |
| DCP2 | hsa-miR-2322-5p    |
| DCP2 | hsa-miR-8842       |
| DCP2 | hsa-miR-374        |
| DCP2 | hsa-miR-669b-5p    |
| DCP2 | hsa-miR-7342-5p    |
| DCP2 | hsa-miR-7325-3p    |
| DCP2 | hsa-miR-3596a      |
| DCP2 | hsa-miR-6894-3p    |
| DCP2 | hsa-miR-4724-3p    |
| DCP2 | hsa-miR-518-3p     |
| DCP2 | hsa-miR-6991-3p    |
| DCP2 | hsa-miR-7349-3p    |
| DCP2 | hsa-miR-1835       |
| DCP2 | hsa-miR-7113-3p    |
| DCP2 | hsa-miR-548ao-3p   |
| DCP2 | hsa-miR-2388-3p    |
| DCP2 | hsa-miR-7324-3p    |
| DCP2 | hsa-miR-31-5p      |
| DCP2 | hsa-miR-8076       |
| DCP2 | hsa-miR-6523b      |
| DCP2 | hsa-miR-6373       |
| DCP2 | hsa-miR-7394a-5p   |
| DCP2 | hsa-miR-197-3p     |
| DCP2 | hsa-miR-1198-3p    |
| DCP2 | hsa-miR-219a-5p    |
| DCP2 | hsa-miR-653        |
| DCP2 | hsa-miR-374-5p     |
| DCP2 | hsa-miR-4708-3p    |
| DCP2 | hsa-miR-673-5p     |
| DCP2 | hsa-miR-135-3p     |
| DCP2 | hsa-miR-3926       |
| DCP2 | hsa-miR-8908f      |

|      |                   |
|------|-------------------|
| DCP2 | hsa-miR-466l-3p   |
| DCP2 | hsa-miR-545-3p    |
| DCP2 | hsa-miR-1814b     |
| DCP2 | hsa-miR-548s      |
| DCP2 | hsa-miR-7682-5p   |
| DCP2 | hsa-miR-6760-5p   |
| DCP2 | hsa-miR-544-5p    |
| DCP2 | hsa-miR-34        |
| DCP2 | hsa-miR-7042-5p   |
| DCP2 | hsa-miR-7015-5p   |
| DCP2 | hsa-miR-1245b-3p  |
| DCP2 | hsa-miR-370       |
| DCP2 | hsa-miR-7151-3p   |
| DCP2 | hsa-miR-301-3p    |
| DCP2 | hsa-miR-200ab-5p  |
| DCP2 | hsa-miR-8906      |
| DCP2 | hsa-miR-2455      |
| DCP2 | hsa-miR-4755-3p   |
| DCP2 | hsa-miR-7285-3p   |
| DCP2 | hsa-miR-3941      |
| DCP2 | hsa-miR-298-5p    |
| DCP2 | hsa-miR-3978      |
| DCP2 | hsa-miR-7055-5p   |
| DCP2 | hsa-miR-374-3p    |
| DCP2 | hsa-miR-8876      |
| DCP2 | hsa-miR-8908e     |
| DCP2 | hsa-miR-1255-3p   |
| DCP2 | hsa-miR-7331-2-3p |
| DCP2 | hsa-miR-3654      |
| DCP2 | hsa-miR-6852-5p   |
| DCP2 | hsa-miR-6525      |
| DCP2 | hsa-miR-4760-5p   |
| DCP2 | hsa-miR-3689f     |
| DCP2 | hsa-miR-4520-2-3p |
| DCP2 | hsa-miR-3573-3p   |
| DCP2 | hsa-miR-432-5p    |
| DCP2 | hsa-miR-2340      |
| DCP2 | hsa-miR-883-3p    |
| DCP2 | hsa-miR-377-5p    |
| DCP2 | hsa-miR-8063      |
| DCP2 | hsa-miR-7680-5p   |
| DCP2 | hsa-miR-8103      |
| DCP2 | hsa-miR-3160-3p   |
| DCP2 | hsa-miR-26b-3p    |
| DCP2 | hsa-miR-3100-3p   |
| DCP2 | hsa-miR-106-3p    |

|      |                   |
|------|-------------------|
| DCP2 | hsa-miR-4511      |
| DCP2 | hsa-miR-3919      |
| DCP2 | hsa-miR-3689-3p   |
| DCP2 | hsa-miR-4802-3p   |
| DCP2 | hsa-miR-6327      |
| DCP2 | hsa-miR-4763-3p   |
| DCP2 | hsa-miR-207       |
| DCP2 | hsa-miR-1255a     |
| DCP2 | hsa-miR-376a-1-5p |
| DCP2 | hsa-miR-2450bd    |
| DCP2 | hsa-miR-8809      |
| DCP2 | hsa-miR-4478      |
| DCP2 | hsa-miR-1284      |
| DCP2 | hsa-miR-299-3p    |
| DCP2 | hsa-miR-4519      |
| DCP2 | hsa-miR-410-5p    |
| DCP2 | hsa-miR-6778-3p   |
| DCP2 | hsa-miR-126-5p    |
| DCP2 | hsa-miR-7855-5p   |
| DCP2 | hsa-miR-589-5p    |
| DCP2 | hsa-miR-4279      |
| DCP2 | hsa-miR-2421      |
| DCP2 | hsa-miR-6777-3p   |
| DCP2 | hsa-miR-5095      |
| DCP2 | hsa-miR-16-3p     |
| DCP2 | hsa-miR-7238-3p   |
| DCP2 | hsa-miR-133a-3p.2 |
| DCP2 | hsa-miR-486-3p    |
| DCP2 | hsa-miR-6923-3p   |
| DCP2 | hsa-miR-206       |
| DCP2 | hsa-miR-367-3p    |
| DCP2 | hsa-miR-8891      |
| DCP2 | hsa-miR-2285y     |
| DCP2 | hsa-miR-7685-5p   |
| DCP2 | hsa-miR-7007-5p   |
| DCP2 | hsa-miR-365-5p    |
| DCP2 | hsa-miR-8873a     |
| DCP2 | hsa-miR-126-3p    |
| DCP2 | hsa-miR-6737-3p   |
| DCP2 | hsa-miR-3154      |
| DCP2 | hsa-miR-4689      |
| DCP2 | hsa-miR-5698      |
| DCP2 | hsa-miR-6833-5p   |
| DCP2 | hsa-miR-9-5p      |
| DCP2 | hsa-miR-674-5p    |
| DCP2 | hsa-miR-606       |



|      |                  |
|------|------------------|
| DCP2 | hsa-miR-7215-3p  |
| DCP2 | hsa-miR-219b-5p  |
| DCP2 | hsa-miR-465-3p   |
| DCP2 | hsa-miR-301      |
| DCP2 | hsa-miR-7673-5p  |
| DCP2 | hsa-miR-524-5p   |
| DCP2 | hsa-miR-6967-3p  |
| DCP2 | hsa-miR-549-3p   |
| DCP2 | hsa-miR-8118     |
| DCP2 | hsa-miR-6918-5p  |
| DCP2 | hsa-miR-144-3p   |
| DCP2 | hsa-miR-7253-3p  |
| DCP2 | hsa-miR-7389-5p  |
| DCP2 | hsa-miR-6730-5p  |
| DCP2 | hsa-miR-7375-5p  |
| DCP2 | hsa-miR-7207-3p  |
| DCP2 | hsa-miR-3180-5p  |
| DCP2 | hsa-miR-468-3p   |
| DCP2 | hsa-miR-144-5p   |
| DCP2 | hsa-miR-8875     |
| DCP2 | hsa-miR-887-5p   |
| DCP2 | hsa-miR-6977-5p  |
| DCP2 | hsa-miR-297bc-3p |
| DCP2 | hsa-miR-7251-5p  |
| DCP2 | hsa-miR-4726-3p  |
| DCP2 | hsa-miR-374b-3p  |
| DCP2 | hsa-miR-525-5p   |
| DCP2 | hsa-miR-330-3p.1 |
| DCP2 | hsa-miR-7302-3p  |
| DCP2 | hsa-miR-649      |
| DCP2 | hsa-miR-146a-3p  |
| DCP2 | hsa-let-7ag-3p   |
| DCP2 | hsa-miR-330-3p   |
| DCP2 | hsa-miR-3109-5p  |
| DCP2 | hsa-miR-7326-3p  |
| DCP2 | hsa-miR-4427     |
| DCP2 | hsa-miR-3129-5p  |
| DCP2 | hsa-miR-302f     |
| DCP2 | hsa-miR-642b-5p  |
| DCP2 | hsa-miR-7181-5p  |
| DCP2 | hsa-miR-30a-5p   |
| DCP2 | hsa-miR-3095-3p  |
| DCP2 | hsa-miR-4774-5p  |
| DCP2 | hsa-miR-223-5p   |
| DCP2 | hsa-miR-6393     |
| DCP2 | hsa-miR-7398l-5p |

|      |                  |
|------|------------------|
| DCP2 | hsa-miR-4423     |
| DCP2 | hsa-miR-548ai    |
| DCP2 | hsa-miR-194-1-3p |
| DCP2 | hsa-miR-7159-5p  |
| DCP2 | hsa-miR-422      |
| DCP2 | hsa-miR-8805     |
| DCP2 | hsa-miR-320b     |
| DCP2 | hsa-miR-1247-3p  |
| DCP2 | hsa-miR-291-3p   |
| DCP2 | hsa-miR-2284l    |
| DCP2 | hsa-miR-940      |
| DCP2 | hsa-miR-677      |
| DCP2 | hsa-miR-23-5p    |
| DCP2 | hsa-miR-763      |
| DCP2 | hsa-miR-5709-3p  |
| DCP2 | hsa-miR-586      |
| DCP2 | hsa-miR-383-3p   |
| DCP2 | hsa-miR-645      |
| DCP2 | hsa-miR-3689b-5p |
| DCP2 | hsa-miR-671-5p   |
| DCP2 | hsa-miR-3551-3p  |
| DCP2 | hsa-miR-6331     |
| DCP2 | hsa-miR-7068-3p  |
| DCP2 | hsa-miR-4534     |
| DCP2 | hsa-miR-512-5p   |
| DCP2 | hsa-miR-7027-5p  |
| DCP2 | hsa-miR-2284d    |
| DCP2 | hsa-miR-6887-3p  |
| DCP2 | hsa-miR-2402     |
| DCP2 | hsa-miR-2447     |
| DCP2 | hsa-miR-6819-5p  |
| DCP2 | hsa-miR-7010-5p  |
| DCP2 | hsa-miR-3613-3p  |
| DCP2 | hsa-miR-3152-5p  |
| DCP2 | hsa-miR-6905-5p  |
| DCP2 | hsa-miR-3120-3p  |
| DCP2 | hsa-miR-7850-5p  |
| DCP2 | hsa-miR-1343-3p  |
| DCP2 | hsa-let-7f-1-3p  |
| DCP2 | hsa-miR-1323     |
| DCP2 | hsa-miR-4735-5p  |
| DCP2 | hsa-miR-3620-3p  |
| DCP2 | hsa-miR-3120-3p  |
| DCP2 | hsa-miR-6325     |
| DCP2 | hsa-miR-6502-3p  |
| DCP2 | hsa-miR-483-3p.1 |

|      |                  |
|------|------------------|
| DCP2 | hsa-miR-512-3p   |
| DCP2 | hsa-miR-3591-5p  |
| DCP2 | hsa-miR-6323     |
| DCP2 | hsa-miR-1258     |
| DCP2 | hsa-miR-4298     |
| DCP2 | hsa-miR-487-3p   |
| DCP2 | hsa-miR-5690     |
| DCP2 | hsa-miR-7075-5p  |
| DCP2 | hsa-miR-2286     |
| DCP2 | hsa-miR-376c     |
| DCP2 | hsa-miR-3667-5p  |
| DCP2 | hsa-miR-182-5p   |
| DCP2 | hsa-miR-2335     |
| DCP2 | hsa-miR-7664-5p  |
| DCP2 | hsa-miR-6847-5p  |
| DCP2 | hsa-miR-2431-5p  |
| DCP2 | hsa-let-7c-1-3p  |
| DCP2 | hsa-miR-471-3p   |
| DCP2 | hsa-miR-1909-3p  |
| DCP2 | hsa-miR-8099     |
| DCP2 | hsa-miR-8818     |
| DCP2 | hsa-miR-7269-3p  |
| DCP2 | hsa-miR-758-3p   |
| DCP2 | hsa-miR-4251     |
| DCP2 | hsa-miR-2904     |
| DCP2 | hsa-miR-2349     |
| DCP2 | hsa-miR-3161     |
| DCP2 | hsa-miR-7191-3p  |
| DCP2 | hsa-miR-3127-5p  |
| DCP2 | hsa-miR-3622a-3p |
| DCP2 | hsa-miR-500      |
| DCP2 | hsa-miR-7249-3p  |
| DCP2 | hsa-miR-7350-5p  |
| DCP2 | hsa-miR-1897-5p  |
| DCP2 | hsa-miR-7322-5p  |
| DCP2 | hsa-miR-5006-3p  |
| DCP2 | hsa-miR-6744-3p  |
| DCP2 | hsa-miR-7051-5p  |
| DCP2 | hsa-miR-7398e-3p |
| DCP2 | hsa-miR-4439     |
| DCP2 | hsa-miR-2343     |
| DCP2 | hsa-miR-8895     |
| DCP2 | hsa-miR-4792     |
| DCP2 | hsa-miR-2183     |
| DCP2 | hsa-miR-713      |
| DCP2 | hsa-miR-1207-3p  |

|      |                   |
|------|-------------------|
| DCP2 | hsa-miR-1268a     |
| DCP2 | hsa-miR-4419b     |
| DCP2 | hsa-miR-2431-3p   |
| DCP2 | hsa-miR-1267      |
| DCP2 | hsa-miR-587       |
| DCP2 | hsa-miR-412-3p    |
| DCP2 | hsa-miR-1207      |
| DCP2 | hsa-miR-1966-3p   |
| DCP2 | hsa-miR-507       |
| DCP2 | hsa-miR-3943      |
| DCP2 | hsa-miR-292b-5p   |
| DCP2 | hsa-miR-6812-5p   |
| DCP2 | hsa-miR-1982-3p   |
| DCP2 | hsa-miR-4742-3p   |
| DCP2 | hsa-miR-6751-5p   |
| DCP2 | hsa-miR-593-3p    |
| DCP2 | hsa-miR-1841      |
| DCP2 | hsa-miR-511-5p    |
| DCP2 | hsa-miR-3675-5p   |
| DCP2 | hsa-miR-494       |
| DCP2 | hsa-miR-23-3p     |
| DCP2 | hsa-miR-505-5p    |
| DCP2 | hsa-miR-665       |
| DCP2 | hsa-miR-378a-5p   |
| DCP2 | hsa-miR-8087      |
| DCP2 | hsa-miR-7342-3p   |
| DCP2 | hsa-miR-7374c-3p  |
| DCP2 | hsa-miR-7370-3p   |
| DCP2 | hsa-miR-890-5p    |
| DCP2 | hsa-miR-140-5p    |
| DCP2 | hsa-miR-30d-5p    |
| DCP2 | hsa-miR-4786-5p   |
| DCP2 | hsa-miR-873a-5p.2 |
| DCP2 | hsa-miR-6715b-5p  |
| DCP2 | hsa-miR-488-5p    |
| DCP2 | hsa-miR-7299-3p   |
| DCP2 | hsa-miR-7323-5p   |
| DCP2 | hsa-miR-2308      |
| DCP2 | hsa-miR-101-3p    |
| DCP2 | hsa-miR-555       |
| DCP2 | hsa-miR-452-3p    |
| DCP2 | hsa-miR-4435      |
| DCP2 | hsa-miR-4423-3p   |
| DCP2 | hsa-miR-942-3p    |
| DCP2 | hsa-miR-1956      |
| DCP2 | hsa-miR-4685-3p   |

|      |                 |
|------|-----------------|
| DCP2 | hsa-miR-7282-5p |
| DCP2 | hsa-miR-7680-3p |
| DCP2 | hsa-miR-3606-5p |
| DCP2 | hsa-miR-2277-3p |
| DCP2 | hsa-miR-6412    |
| DCP2 | hsa-miR-6590-3p |
| DCP2 | hsa-miR-2435    |
| DCP2 | hsa-miR-4274    |
| DCP2 | hsa-miR-7075-3p |
| DCP2 | hsa-miR-6914-3p |
| DCP2 | hsa-miR-6779-3p |
| DCP2 | hsa-miR-1286    |
| DCP2 | hsa-miR-1813    |
| DCP2 | hsa-miR-1228-3p |
| DCP2 | hsa-miR-628-5p  |
| DCP2 | hsa-miR-7664-3p |
| DCP2 | hsa-miR-6901-3p |
| DCP2 | hsa-miR-216     |
| DCP2 | hsa-miR-624-3p  |
| DCP2 | hsa-miR-185-3p  |
| DCP2 | hsa-miR-7340-5p |
| DCP2 | hsa-miR-7343-5p |
| DCP2 | hsa-miR-3155a   |
| DCP2 | hsa-miR-6996-5p |
| DCP2 | hsa-miR-384-3p  |
| DCP2 | hsa-miR-575     |
| DCP2 | hsa-miR-5089-3p |
| DCP2 | hsa-miR-369-3p  |
| DCP2 | hsa-miR-4719    |
| DCP2 | hsa-miR-6715-5p |
| DCP2 | hsa-miR-4712-3p |
| DCP2 | hsa-miR-302     |
| DCP2 | hsa-miR-710     |
| DCP2 | hsa-miR-6899-5p |
| DCP2 | hsa-miR-548e-5p |
| DCP2 | hsa-miR-134     |
| DCP2 | hsa-miR-18      |
| DCP2 | hsa-miR-6811-3p |
| DCP2 | hsa-miR-2285    |
| DCP2 | hsa-miR-7354-5p |
| DCP2 | hsa-miR-881-3p  |
| DCP2 | hsa-miR-4645-5p |
| DCP2 | hsa-miR-375     |
| DCP2 | hsa-miR-92-3p   |
| DCP2 | hsa-miR-4803    |
| DCP2 | hsa-miR-701-3p  |

|      |                   |
|------|-------------------|
| DCP2 | hsa-miR-660-5p    |
| DCP2 | hsa-miR-7049-3p   |
| DCP2 | hsa-miR-5701      |
| DCP2 | hsa-miR-4490      |
| DCP2 | hsa-miR-7109-3p   |
| DCP2 | hsa-miR-7111-5p   |
| DCP2 | hsa-miR-7204-3p   |
| DCP2 | hsa-miR-548bb-5p  |
| DCP2 | hsa-miR-762       |
| DCP2 | hsa-miR-200a-3p   |
| DCP2 | hsa-miR-7386g-3p  |
| DCP2 | hsa-miR-664a-3p   |
| DCP2 | hsa-miR-8874      |
| DCP2 | hsa-miR-7172-5p   |
| DCP2 | hsa-miR-181b-3p   |
| DCP2 | hsa-miR-2285n     |
| DCP2 | hsa-miR-455-5p    |
| DCP2 | hsa-miR-19a-3p    |
| DCP2 | hsa-miR-890-3p    |
| DCP2 | hsa-miR-2388-5p   |
| DCP2 | hsa-miR-7233-5p   |
| DCP2 | hsa-miR-3167-3p   |
| DCP2 | hsa-miR-664-3p    |
| DCP2 | hsa-miR-7234-5p   |
| DCP2 | hsa-miR-1185-3p   |
| DCP2 | hsa-miR-3579      |
| DCP2 | hsa-miR-496a-3p.2 |
| DCP2 | hsa-miR-7192-3p   |
| DCP2 | hsa-miR-30ad-3p   |
| DCP2 | hsa-miR-677-3p    |
| DCP2 | hsa-miR-6507-3p   |
| DCP2 | hsa-miR-3549      |
| DCP2 | hsa-let-7a-2-3p   |
| DCP2 | hsa-miR-548v      |
| DCP2 | hsa-miR-7225-3p   |
| DCP2 | hsa-miR-103a-2-5p |
| DCP2 | hsa-miR-192-5p    |
| DCP2 | hsa-miR-7371b-3p  |
| DCP2 | hsa-miR-4293      |
| DCP2 | hsa-miR-7386h-5p  |
| DCP2 | hsa-miR-3553      |
| DCP2 | hsa-miR-2898      |
| DCP2 | hsa-miR-6123      |
| DCP2 | hsa-miR-21-3p     |
| DCP2 | hsa-miR-8061      |
| DCP2 | hsa-miR-4717-5p   |

|      |                  |
|------|------------------|
| DCP2 | hsa-miR-129-5p   |
| DCP2 | hsa-miR-346-3p   |
| DCP2 | hsa-miR-7159-3p  |
| DCP2 | hsa-miR-6986-5p  |
| DCP2 | hsa-miR-551b-5p  |
| DCP2 | hsa-miR-4528     |
| DCP2 | hsa-miR-7578     |
| DCP2 | hsa-miR-7281-3p  |
| DCP2 | hsa-miR-4636     |
| DCP2 | hsa-miR-670      |
| DCP2 | hsa-miR-4524a-5p |
| DCP2 | hsa-miR-152      |
| DCP2 | hsa-miR-8816     |
| DCP2 | hsa-miR-4438     |
| DCP2 | hsa-miR-190-3p   |
| DCP2 | hsa-miR-580-3p   |
| DCP2 | hsa-miR-3102     |
| DCP2 | hsa-miR-623      |
| DCP2 | hsa-miR-23c      |
| DCP2 | hsa-miR-4642     |
| DCP2 | hsa-miR-499b-3p  |
| DCP2 | hsa-miR-380-3p   |
| DCP2 | hsa-miR-7398f-3p |
| DCP2 | hsa-miR-878-5p   |
| DCP2 | hsa-miR-1934-5p  |
| DCP2 | hsa-miR-363-3p   |
| DCP2 | hsa-miR-6942-3p  |
| DCP2 | hsa-miR-498      |
| DCP2 | hsa-miR-7307-3p  |
| DCP2 | hsa-miR-548bd-3p |
| DCP2 | hsa-miR-101-3p.1 |
| DCP2 | hsa-miR-3927-3p  |
| DCP2 | hsa-miR-4694-3p  |
| DCP2 | hsa-miR-2400     |
| DCP2 | hsa-miR-1844     |
| DCP2 | hsa-miR-576-5p   |
| DCP2 | hsa-miR-340-5p   |
| DCP2 | hsa-miR-7156-3p  |
| DCP2 | hsa-miR-8054     |
| DCP2 | hsa-miR-4733-3p  |
| DCP2 | hsa-miR-2285z    |
| DCP2 | hsa-miR-4256     |
| DCP2 | hsa-miR-493-5p   |
| DCP2 | hsa-miR-2480     |
| DCP2 | hsa-miR-101-5p   |
| DCP2 | hsa-miR-892-5p   |

|      |                   |
|------|-------------------|
| DCP2 | hsa-miR-3088-3p   |
| DCP2 | hsa-miR-7398b-3p  |
| DCP2 | hsa-miR-365a-5p   |
| DCP2 | hsa-miR-669j      |
| DCP2 | hsa-miR-1185-5p   |
| DCP2 | hsa-miR-6843-3p   |
| DCP2 | hsa-miR-192-3p    |
| DCP2 | hsa-miR-337-3p    |
| DCP2 | hsa-miR-376a-2-5p |
| DCP2 | hsa-miR-8843      |
| DCP2 | hsa-miR-494-3p    |
| DCP2 | hsa-miR-374a-3p   |
| DCP2 | hsa-miR-1197-3p   |
| DCP2 | hsa-miR-7260-5p   |
| DCP2 | hsa-miR-6792-3p   |
| DCP2 | hsa-miR-3678-3p   |
| DCP2 | hsa-miR-106a-3p   |
| DCP2 | hsa-miR-527       |
| DCP2 | hsa-miR-200       |
| DCP2 | hsa-miR-7703      |
| DCP2 | hsa-miR-6891-3p   |
| DCP2 | hsa-miR-550b-2-5p |
| DCP2 | hsa-miR-6540-3p   |
| DCP2 | hsa-miR-6516      |
| DCP2 | hsa-miR-191-5p    |
| DCP2 | hsa-miR-520       |
| DCP2 | hsa-miR-4526      |
| DCP2 | hsa-miR-9a-3p     |
| DCP2 | hsa-miR-1224-5p   |
| DCP2 | hsa-miR-4536-5p   |
| DCP2 | hsa-miR-16-2-3p   |
| DCP2 | hsa-miR-8094      |
| DCP2 | hsa-miR-4698      |
| DCP2 | hsa-miR-6855-3p   |
| DCP2 | hsa-miR-7247-5p   |
| DCP2 | hsa-miR-3660      |
| DCP2 | hsa-miR-297       |
| DCP2 | hsa-miR-6999-3p   |
| DCP2 | hsa-miR-2310      |
| DCP2 | hsa-miR-3148      |
| DCP2 | hsa-miR-4797-3p   |
| DCP2 | hsa-miR-7339-3p   |
| DCP2 | hsa-miR-6898-5p   |
| DCP2 | hsa-miR-93-5p     |
| DCP2 | hsa-miR-145-3p    |
| DCP2 | hsa-miR-2364      |



|      |                  |
|------|------------------|
| DCP2 | hsa-miR-1912     |
| DCP2 | hsa-miR-4796-3p  |
| DCP2 | hsa-miR-571      |
| DCP2 | hsa-miR-548ay-5p |
| DCP2 | hsa-miR-626      |
| DCP2 | hsa-miR-7364-3p  |
| DCP2 | hsa-miR-7158-5p  |
| DCP2 | hsa-miR-6374     |
| DCP2 | hsa-miR-294-3p   |
| DCP2 | hsa-miR-7291-3p  |
| DCP2 | hsa-miR-7093-3p  |
| DCP2 | hsa-miR-4667     |
| DCP2 | hsa-miR-1251-3p  |
| DCP2 | hsa-miR-181-5p   |
| DCP2 | hsa-miR-323-3p   |
| DCP2 | hsa-miR-7347-3p  |
| DCP2 | hsa-miR-1252-3p  |
| DCP2 | hsa-miR-7446-5p  |
| DCP2 | hsa-miR-6080     |
| DCP2 | hsa-miR-568      |
| DCP2 | hsa-miR-4760-3p  |
| DCP2 | hsa-miR-7663-5p  |
| DCP2 | hsa-miR-548b-3p  |
| DCP2 | hsa-miR-676-3p   |
| DCP2 | hsa-miR-7245-3p  |
| DCP2 | hsa-miR-556-3p   |
| DCP2 | hsa-miR-5697-3p  |
| DCP2 | hsa-miR-2354     |
| DCP2 | hsa-miR-7019-5p  |
| DCP2 | hsa-miR-376b-5p  |
| DCP2 | hsa-miR-3149     |
| DCP2 | hsa-miR-514-3p   |
| DCP2 | hsa-miR-1948-5p  |
| DCP2 | hsa-miR-105-5p   |
| DCP2 | hsa-miR-143-5p   |
| DCP2 | hsa-miR-3116     |
| DCP2 | hsa-miR-503-5p   |
| DCP2 | hsa-miR-552-5p   |
| DCP2 | hsa-miR-8113     |
| DCP2 | hsa-miR-295-5p   |
| DCP2 | hsa-miR-205-5p   |
| DCP2 | hsa-miR-942      |
| DCP2 | hsa-miR-486-5p   |
| DCP2 | hsa-miR-1343     |
| DCP2 | hsa-miR-7006-3p  |
| DCP2 | hsa-miR-8095     |

|      |                   |
|------|-------------------|
| DCP2 | hsa-miR-6529      |
| DCP2 | hsa-miR-451-3p    |
| DCP2 | hsa-miR-6508-3p   |
| DCP2 | hsa-miR-1264      |
| DCP2 | hsa-miR-1-1-5p    |
| DCP2 | hsa-miR-7278-3p   |
| DCP2 | hsa-miR-2411-3p   |
| DCP2 | hsa-miR-5189-5p   |
| DCP2 | hsa-miR-23a-5p    |
| DCP2 | hsa-miR-193-3p    |
| DCP2 | hsa-miR-490-3p    |
| DCP2 | hsa-miR-8066      |
| DCP2 | hsa-miR-299a-5p   |
| DCP2 | hsa-miR-6085      |
| DCP2 | hsa-miR-4652-3p   |
| DCP2 | hsa-miR-2323      |
| DCP2 | hsa-miR-548h-5p   |
| DCP2 | hsa-miR-655-5p    |
| DCP2 | hsa-miR-1912-3p   |
| DCP2 | hsa-miR-4801      |
| DCP2 | hsa-miR-743-5p    |
| DCP2 | hsa-miR-1960      |
| DCP2 | hsa-miR-3672      |
| DCP2 | hsa-miR-8905      |
| DCP2 | hsa-miR-7262b-5p  |
| DCP2 | hsa-miR-636       |
| DCP2 | hsa-miR-6896-5p   |
| DCP2 | hsa-miR-518g-3p   |
| DCP2 | hsa-miR-4446-5p   |
| DCP2 | hsa-miR-6930-3p   |
| DCP2 | hsa-miR-4708-5p   |
| DCP2 | hsa-miR-2115-5p   |
| DCP2 | hsa-miR-1246      |
| DCP2 | hsa-miR-1643-3p   |
| DCP2 | hsa-miR-7351-5p   |
| DCP2 | hsa-miR-196       |
| DCP2 | hsa-miR-19        |
| DCP2 | hsa-miR-2452      |
| DCP2 | hsa-miR-4742      |
| DCP2 | hsa-miR-2347      |
| DCP2 | hsa-miR-3078-5p   |
| DCP2 | hsa-miR-199b-3-5p |
| DCP2 | hsa-miR-4662-5p   |
| DCP2 | hsa-miR-6839-5p   |
| DCP2 | hsa-miR-298-3p    |
| DCP2 | hsa-miR-493       |

|      |                  |
|------|------------------|
| DCP2 | hsa-miR-3577-5p  |
| DCP2 | hsa-miR-1295a    |
| DCP2 | hsa-miR-1298     |
| DCP2 | hsa-miR-545-5p   |
| DCP2 | hsa-miR-640      |
| DCP2 | hsa-miR-6797-3p  |
| DCP2 | hsa-miR-548ar-3p |
| DCP2 | hsa-miR-3130-3p  |
| DCP2 | hsa-miR-4643     |
| DCP2 | hsa-miR-1434-3p  |
| DCP2 | hsa-miR-434-3p   |
| DCP2 | hsa-miR-216a-5p  |
| DCP2 | hsa-miR-6904-5p  |
| DCP2 | hsa-miR-3473f    |
| DCP2 | hsa-miR-4789-5p  |
| DCP2 | hsa-miR-764-3p   |
| DCP2 | hsa-miR-548c-5p  |
| DCP2 | hsa-miR-3616-5p  |
| DCP2 | hsa-miR-513      |
| DCP2 | hsa-miR-3613b    |
| DCP2 | hsa-miR-6948-3p  |
| DCP2 | hsa-miR-2315     |
| DCP2 | hsa-miR-8841     |
| DCP2 | hsa-miR-195-3p   |
| DCP2 | hsa-miR-496      |
| DCP2 | hsa-miR-29c-3p   |
| DCP2 | hsa-miR-2426     |
| DCP2 | hsa-miR-211-5p   |
| DCP2 | hsa-miR-299      |
| DCP2 | hsa-miR-7194-3p  |
| DCP2 | hsa-miR-3060-3p  |
| DCP2 | hsa-miR-6950-5p  |
| DCP2 | hsa-miR-7197-3p  |
| DCP2 | hsa-miR-4420     |
| DCP2 | hsa-miR-219b-3p  |
| DCP2 | hsa-miR-7398j-3p |
| DCP2 | hsa-miR-27b-3p   |
| DCP2 | hsa-miR-5626-3p  |
| DCP2 | hsa-miR-383-5p.2 |
| DCP2 | hsa-miR-579      |
| DCP2 | hsa-miR-1199-5p  |
| DCP2 | hsa-miR-2284g    |
| DCP2 | hsa-miR-7059-3p  |
| DCP2 | hsa-miR-654-5p   |
| DCP2 | hsa-miR-6731-5p  |
| DCP2 | hsa-miR-612      |

|      |                   |
|------|-------------------|
| DCP2 | hsa-miR-7162-3p   |
| DCP2 | hsa-miR-511       |
| DCP2 | hsa-miR-8858      |
| DCP2 | hsa-miR-18-5p     |
| DCP2 | hsa-miR-924       |
| DCP2 | hsa-miR-1304-5p   |
| DCP2 | hsa-miR-294-5p    |
| DCP2 | hsa-miR-6844      |
| DCP2 | hsa-miR-421       |
| DCP2 | hsa-miR-127-5p    |
| DCP2 | hsa-miR-4503      |
| DCP2 | hsa-miR-103-3p    |
| DCP2 | hsa-miR-6881-5p   |
| DCP2 | hsa-miR-2317      |
| DCP2 | hsa-miR-510       |
| DCP2 | hsa-miR-6787-3p   |
| DCP2 | hsa-miR-125a-3p   |
| DCP2 | hsa-miR-7201-5p   |
| DCP2 | hsa-miR-890       |
| DCP2 | hsa-miR-8814      |
| DCP2 | hsa-miR-6756-3p   |
| DCP2 | hsa-miR-6957-5p   |
| DCP2 | hsa-miR-210-3p    |
| DCP2 | hsa-miR-6899-3p   |
| DCP2 | hsa-miR-455-5p    |
| DCP2 | hsa-miR-378b      |
| DCP2 | hsa-miR-133a-3p.1 |
| DCP2 | hsa-miR-4690-5p   |
| DCP2 | hsa-miR-7347-5p   |
| DCP2 | hsa-miR-7300-5p   |
| DCP2 | hsa-miR-371a-5p   |
| DCP2 | hsa-miR-7173-5p   |
| DCP2 | hsa-miR-7235-3p   |
| DCP2 | hsa-miR-6883-5p   |
| DCP2 | hsa-miR-3686      |
| DCP2 | hsa-miR-5590-5p   |
| DCP2 | hsa-miR-183-5p    |
| DCP2 | hsa-miR-766-3p    |
| DCP2 | hsa-miR-5006-5p   |
| DCP2 | hsa-miR-3971      |
| DCP2 | hsa-miR-1191b-3p  |
| DCP2 | hsa-miR-4328      |
| DCP2 | hsa-miR-4738-3p   |
| DCP2 | hsa-miR-2376      |
| DCP2 | hsa-miR-7321-5p   |
| DCP2 | hsa-miR-548an     |

|      |                 |
|------|-----------------|
| DCP2 | hsa-miR-452-5p  |
| DCP2 | hsa-miR-7390-3p |
| DCP2 | hsa-miR-655     |
| DCP2 | hsa-miR-223-3p  |
| DCP2 | hsa-miR-4769-3p |
| DCP2 | hsa-miR-6216    |
| DCP2 | hsa-miR-669d-5p |
| DCP2 | hsa-miR-6954-3p |
| DCP2 | hsa-miR-1-5p    |
| DCP2 | hsa-miR-582-3p  |
| DCP2 | hsa-miR-499b-5p |
| DCP2 | hsa-miR-7119-3p |
| DCP2 | hsa-miR-7231-3p |
| DCP2 | hsa-miR-550a-5p |
| DCP2 | hsa-miR-6925-3p |
| DCP2 | hsa-miR-483-3p  |
| DCP2 | hsa-miR-423-5p  |
| DCP2 | hsa-miR-6499-3p |
| DCP2 | hsa-miR-5691    |
| DCP2 | hsa-miR-6122-5p |
| DCP2 | hsa-miR-3065-3p |
| DCP2 | hsa-miR-1565    |
| DCP2 | hsa-miR-874-3p  |
| DCP2 | hsa-miR-7269-5p |
| DCP2 | hsa-miR-7208-3p |
| DCP2 | hsa-miR-7081-3p |
| DCP2 | hsa-miR-4499    |
| DCP2 | hsa-miR-6971-5p |
| DCP2 | hsa-miR-1278    |
| DCP2 | hsa-miR-106-5p  |
| DCP2 | hsa-miR-548i-3p |
| DCP2 | hsa-miR-4751    |
| DCP2 | hsa-let-7       |
| DCP2 | hsa-miR-302a-3p |
| DCP2 | hsa-miR-7a-2-3p |
| DCP2 | hsa-miR-7357-5p |
| DCP2 | hsa-miR-320-5p  |
| DCP2 | hsa-miR-150-3p  |
| DCP2 | hsa-miR-615-5p  |
| DCP2 | hsa-miR-1273e   |
| DCP2 | hsa-miR-593-5p  |
| DCP2 | hsa-miR-625-3p  |
| DCP2 | hsa-miR-6414    |
| DCP2 | hsa-miR-147a    |
| DCP2 | hsa-miR-7018-3p |
| DCP2 | hsa-miR-3600    |

|      |                  |
|------|------------------|
| DCP2 | hsa-miR-92a-1-5p |
| DCP2 | hsa-miR-5615-3p  |
| DCP2 | hsa-miR-6834-5p  |
| DCP2 | hsa-miR-409b     |
| DCP2 | hsa-miR-7056-3p  |
| DCP2 | hsa-miR-6528     |
| DCP2 | hsa-miR-186-5p   |
| DCP2 | hsa-miR-2338     |
| DCP2 | hsa-miR-6362     |
| DCP2 | hsa-miR-3194-3p  |
| DCP2 | hsa-miR-2443     |
| DCP2 | hsa-miR-3557-5p  |
| DCP2 | hsa-miR-7308-3p  |
| DCP2 | hsa-miR-2284r    |
| DCP2 | hsa-miR-294      |
| DCP2 | hsa-miR-8813     |
| DCP2 | hsa-miR-6769a-3p |
| DCP2 | hsa-miR-601      |
| DCP2 | hsa-miR-460-5p   |
| DCP2 | hsa-miR-222-3p   |
| DCP2 | hsa-miR-624-5p   |
| DCP2 | hsa-miR-7373-5p  |
| DCP2 | hsa-miR-6806-3p  |
| DCP2 | hsa-miR-500a-5p  |
| DCP2 | hsa-miR-3127-3p  |
| DCP2 | hsa-miR-344i     |
| DCP2 | hsa-miR-6876-5p  |
| DCP2 | hsa-miR-2278     |
| DCP2 | hsa-miR-93-5p    |
| DCP2 | hsa-miR-7186-3p  |
| DCP2 | hsa-miR-4705     |
| DCP2 | hsa-miR-1193-3p  |
| DCP2 | hsa-miR-2284b    |
| DCP2 | hsa-miR-7336-5p  |
| DCP2 | hsa-miR-679-5p   |
| DCP2 | hsa-miR-4766-5p  |
| DCP2 | hsa-miR-7398-3p  |
| DCP2 | hsa-miR-6345     |
| DCP2 | hsa-miR-1942     |
| DCP2 | hsa-miR-4697-3p  |
| DCP2 | hsa-miR-7054-5p  |
| DCP2 | hsa-miR-6907-5p  |
| DCP2 | hsa-miR-7160-5p  |
| DCP2 | hsa-miR-3168     |
| DCP2 | hsa-miR-4744     |
| DCP2 | hsa-miR-2295     |

|      |                  |
|------|------------------|
| DCP2 | hsa-miR-3065-5p  |
| DCP2 | hsa-miR-324-3p   |
| DCP2 | hsa-miR-7152-5p  |
| DCP2 | hsa-miR-22-5p    |
| DCP2 | hsa-miR-889-5p   |
| DCP2 | hsa-miR-470-5p   |
| DCP2 | hsa-miR-7691     |
| DCP2 | hsa-miR-323      |
| DCP2 | hsa-miR-6821-3p  |
| DCP2 | hsa-miR-384-5p   |
| DCP2 | hsa-miR-6481     |
| DCP2 | hsa-miR-1237-3p  |
| DCP2 | hsa-miR-1544-3p  |
| DCP2 | hsa-miR-6801-5p  |
| DCP2 | hsa-miR-1291     |
| DCP2 | hsa-miR-1434-5p  |
| DCP2 | hsa-miR-3560     |
| DCP2 | hsa-miR-6943-5p  |
| DCP2 | hsa-miR-4699-5p  |
| DCP2 | hsa-miR-8068     |
| DCP2 | hsa-miR-1948-3p  |
| DCP2 | hsa-miR-7317-3p  |
| DCP2 | hsa-miR-6416-3p  |
| DCP2 | hsa-miR-3074-3p  |
| DCP2 | hsa-miR-34b-3p   |
| DCP2 | hsa-miR-7039-3p  |
| DCP2 | hsa-miR-7314-3p  |
| DCP2 | hsa-miR-8073     |
| DCP2 | hsa-miR-7006-5p  |
| DCP2 | hsa-miR-466b-5p  |
| DCP2 | hsa-miR-548az-5p |
| DCP2 | hsa-miR-6895-5p  |
| DCP2 | hsa-miR-3472     |
| DCP2 | hsa-miR-1612     |
| DCP2 | hsa-miR-4536-5p  |
| DCP2 | hsa-miR-622      |
| DCP2 | hsa-miR-214-3p   |
| DCP2 | hsa-miR-3078-3p  |
| DCP2 | hsa-miR-1273h-5p |
| DCP2 | hsa-miR-2117     |
| DCP2 | hsa-miR-548as-3p |
| DCP2 | hsa-miR-290a-5p  |
| DCP2 | hsa-miR-349      |
| DCP2 | hsa-miR-5684     |
| DCP2 | hsa-miR-4762-3p  |
| DCP2 | hsa-miR-466h-3p  |

|      |                   |
|------|-------------------|
| DCP2 | hsa-miR-6927-3p   |
| DCP2 | hsa-miR-128-5p    |
| DCP2 | hsa-miR-290b-5p   |
| DCP2 | hsa-miR-7675-3p   |
| DCP2 | hsa-miR-25-3p     |
| DCP2 | hsa-miR-3190-5p   |
| DCP2 | hsa-miR-1179      |
| DCP2 | hsa-miR-27a-3p    |
| DCP2 | hsa-miR-7272-5p   |
| DCP2 | hsa-miR-6778-5p   |
| DCP2 | hsa-miR-6826-3p   |
| DCP2 | hsa-miR-7398-5p   |
| DCP2 | hsa-miR-4684-5p   |
| DCP2 | hsa-miR-6946-3p   |
| DCP2 | hsa-miR-7352-3p   |
| DCP2 | hsa-miR-7212-3p   |
| DCP2 | hsa-miR-200b-5p   |
| DCP2 | hsa-miR-6376      |
| DCP2 | hsa-miR-6321      |
| DCP2 | hsa-miR-1843a-5p  |
| DCP2 | hsa-miR-4477a     |
| DCP2 | hsa-miR-7024-5p   |
| DCP2 | hsa-miR-466ade-3p |
| DCP2 | hsa-miR-3185      |
| DCP2 | hsa-miR-3651      |
| DCP2 | hsa-miR-2114-5p   |
| DCP2 | hsa-miR-605-5p    |
| DCP2 | hsa-miR-7201-3p   |
| DCP2 | hsa-miR-500-3p    |
| DCP2 | hsa-miR-2285r     |
| DCP2 | hsa-miR-300       |
| DCP2 | hsa-miR-7286-3p   |
| DCP2 | hsa-miR-1256      |
| DCP2 | hsa-miR-6905-3p   |
| DCP2 | hsa-miR-4715-3p   |
| DCP2 | hsa-miR-7117-3p   |
| DCP2 | hsa-miR-6870-3p   |
| DCP2 | hsa-miR-1905      |
| DCP2 | hsa-miR-373-5p    |
| DCP2 | hsa-miR-4653-5p   |
| DCP2 | hsa-miR-7398n-3p  |
| DCP2 | hsa-miR-2471-3p   |
| DCP2 | hsa-miR-6888-3p   |
| DCP2 | hsa-let-7c-3p     |
| DCP2 | hsa-miR-1257      |
| DCP2 | hsa-miR-520-5p    |



|      |                  |
|------|------------------|
| DCP2 | hsa-miR-203-3p.2 |
| DCP2 | hsa-miR-2394     |
| DCP2 | hsa-miR-6529-5p  |
| DCP2 | hsa-miR-2284z    |
| DCP2 | hsa-miR-4666b    |
| DCP2 | hsa-miR-6776-3p  |
| DCP2 | hsa-miR-7202-3p  |
| DCP2 | hsa-miR-3571     |
| DCP2 | hsa-miR-495-3p   |
| DCP2 | hsa-miR-7195-3p  |
| DCP2 | hsa-miR-548l     |
| DCP2 | hsa-miR-2464-3p  |
| DCP2 | hsa-miR-203b-3p  |
| DCP2 | hsa-miR-7094-3p  |
| DCP2 | hsa-miR-8838     |
| DCP2 | hsa-miR-6860     |
| DCP2 | hsa-miR-323b-5p  |
| DCP2 | hsa-miR-20-3p    |
| DCP2 | hsa-miR-694      |
| DCP2 | hsa-miR-7183-3p  |
| DCP2 | hsa-miR-7352-5p  |
| DCP2 | hsa-miR-3691-3p  |
| DCP2 | hsa-miR-466f-5p  |
| DCP2 | hsa-miR-876      |
| DCP2 | hsa-miR-3099     |
| DCP2 | hsa-miR-100-3p   |
| DCP2 | hsa-miR-4680-3p  |
| DCP2 | hsa-miR-6317     |
| DCP2 | hsa-miR-22-3p    |
| DCP2 | hsa-miR-669i     |
| DCP2 | hsa-miR-4452     |
| DCP2 | hsa-miR-6878-5p  |
| DCP2 | hsa-miR-4446-3p  |
| DCP2 | hsa-miR-1544b-5p |
| DCP2 | hsa-miR-654-3p   |
| DCP2 | hsa-miR-880-5p   |
| DCP2 | hsa-miR-552-3p   |
| DCP2 | hsa-miR-1903     |
| DCP2 | hsa-miR-6752-3p  |
| DCP2 | hsa-miR-5620-3p  |
| DCP2 | hsa-miR-4264     |
| DCP2 | hsa-miR-3152-3p  |
| DCP2 | hsa-miR-7054-3p  |
| DCP2 | hsa-miR-3966     |
| DCP2 | hsa-miR-2284y    |
| DCP2 | hsa-miR-2113     |

|      |                  |
|------|------------------|
| DCP2 | hsa-miR-1a-5p    |
| DCP2 | hsa-miR-3544-5p  |
| DCP2 | hsa-miR-6875-3p  |
| DCP2 | hsa-miR-6988-5p  |
| DCP2 | hsa-miR-380      |
| DCP2 | hsa-miR-3064-5p  |
| DCP2 | hsa-miR-204-5p   |
| DCP2 | hsa-miR-556-5p   |
| DCP2 | hsa-miR-4699-3p  |
| DCP2 | hsa-miR-4476     |
| DCP2 | hsa-miR-1397-5p  |
| DCP2 | hsa-miR-661      |
| DCP2 | hsa-miR-382-3p   |
| DCP2 | hsa-miR-3925-5p  |
| DCP2 | hsa-miR-6387     |
| DCP2 | hsa-miR-627-5p   |
| DCP2 | hsa-miR-7355-3p  |
| DCP2 | hsa-miR-1655-3p  |
| DCP2 | hsa-miR-29b-1-5p |
| DCP2 | hsa-miR-2681-3p  |
| DCP2 | hsa-miR-4524-5p  |
| DCP2 | hsa-miR-6505-5p  |
| DCP2 | hsa-miR-1295a    |
| DCP2 | hsa-miR-6817-5p  |
| DCP2 | hsa-miR-210-5p   |
| DCP2 | hsa-miR-1255b-5p |
| DCP2 | hsa-miR-7706     |
| DCP2 | hsa-miR-218-1-3p |
| DCP2 | hsa-miR-7191-5p  |
| DCP2 | hsa-miR-7398p-3p |
| DCP2 | hsa-miR-484      |
| DCP2 | hsa-miR-532-3p   |
| DCP2 | hsa-miR-181      |
| DCP2 | hsa-miR-7206-3p  |
| DCP2 | hsa-miR-3071-5p  |
| DCP2 | hsa-miR-6750-3p  |
| DCP2 | hsa-miR-3570     |
| DCP2 | hsa-miR-135      |
| DCP2 | hsa-miR-409-3p   |
| DCP2 | hsa-miR-6701-3p  |
| DCP2 | hsa-miR-148-5p   |
| DCP2 | hsa-miR-1197     |
| DCP2 | hsa-miR-152-3p   |
| DCP2 | hsa-miR-6882-3p  |
| DCP2 | hsa-miR-3614-5p  |
| DCP2 | hsa-miR-193a-5p  |

|      |                  |
|------|------------------|
| DCP2 | hsa-miR-7363-5p  |
| DCP2 | hsa-miR-542-3p   |
| DCP2 | hsa-miR-24-3p    |
| DCP2 | hsa-miR-4695-5p  |
| DCP2 | hsa-miR-3611     |
| DCP2 | hsa-miR-211-5p   |
| DCP2 | hsa-miR-21-5p    |
| DCP2 | hsa-miR-7974     |
| DCP2 | hsa-miR-5591-3p  |
| DCP2 | hsa-miR-4482-3p  |
| DCP2 | hsa-miR-7398i-3p |
| DCP2 | hsa-miR-7073-3p  |
| DCP2 | hsa-miR-6076     |
| DCP2 | hsa-miR-1954     |
| DCP2 | hsa-miR-7069-5p  |
| DCP2 | hsa-miR-487a     |
| DCP2 | hsa-miR-7312-5p  |
| DCP2 | hsa-miR-1958     |
| DCP2 | hsa-miR-1929-3p  |
| DCP2 | hsa-miR-26-3-3p  |
| DCP2 | hsa-miR-4728-3p  |
| DCP2 | hsa-miR-190a-5p  |
| DCP2 | hsa-miR-670-3p   |
| DCP2 | hsa-miR-365a-3p  |
| DCP2 | hsa-miR-344eh-5p |
| DCP2 | hsa-miR-8808     |
| DCP2 | hsa-miR-2284v    |
| DCP2 | hsa-miR-8832     |
| DCP2 | hsa-miR-5692bc   |
| DCP2 | hsa-miR-1255-5p  |
| DCP2 | hsa-miR-429      |
| DCP2 | hsa-miR-4668-3p  |
| DCP2 | hsa-miR-381-5p   |
| DCP2 | hsa-miR-130-3p   |
| DCP2 | hsa-miR-137      |
| DCP2 | hsa-miR-3073a-3p |
| DCP2 | hsa-miR-548bb-3p |
| DCP2 | hsa-miR-582-5p   |
| DCP2 | hsa-miR-487a-5p  |
| DCP2 | hsa-miR-550-5p   |
| DCP2 | hsa-miR-7291-5p  |
| DCP2 | hsa-miR-6737-5p  |
| DCP2 | hsa-miR-212-5p   |
| DCP2 | hsa-miR-2477     |
| DCP2 | hsa-miR-3653-3p  |
| DCP2 | hsa-miR-1b-5p    |

|      |                   |
|------|-------------------|
| DCP2 | hsa-miR-550a-3p   |
| DCP2 | hsa-miR-3062-5p   |
| DCP2 | hsa-miR-3199      |
| DCP2 | hsa-miR-687       |
| DCP2 | hsa-miR-3688-5p   |
| DCP2 | hsa-miR-4673      |
| DCP2 | hsa-miR-7374-5p   |
| DCP2 | hsa-miR-1296      |
| DCP2 | hsa-miR-6945-3p   |
| DCP2 | hsa-miR-451a      |
| DCP2 | hsa-miR-7267-3p   |
| DCP2 | hsa-miR-7206-5p   |
| DCP2 | hsa-miR-505-3p    |
| DCP2 | hsa-miR-208-5p    |
| DCP2 | hsa-miR-518a-5p   |
| DCP2 | hsa-miR-4720-3p   |
| DCP2 | hsa-miR-5697      |
| DCP2 | hsa-miR-3913-3p   |
| DCP2 | hsa-miR-185-5p    |
| DCP2 | hsa-miR-547-5p    |
| DCP2 | hsa-miR-1304-3p   |
| DCP2 | hsa-miR-8881      |
| DCP2 | hsa-miR-3200-5p   |
| DCP2 | hsa-miR-872-3p    |
| DCP2 | hsa-miR-4443      |
| DCP2 | hsa-miR-350-3p    |
| DCP2 | hsa-miR-370-3p    |
| DCP2 | hsa-miR-590-5p    |
| DCP2 | hsa-miR-5584-5p   |
| DCP2 | hsa-miR-3606-3p   |
| DCP2 | hsa-miR-883a-5p   |
| DCP2 | hsa-miR-6512-5p   |
| DCP2 | hsa-miR-218a-1-3p |
| DCP2 | hsa-miR-208-3p    |
| DCP2 | hsa-miR-3618-3p   |
| DCP2 | hsa-miR-1545b-5p  |
| DCP2 | hsa-miR-1273d     |
| DCP2 | hsa-miR-2362      |
| DCP2 | hsa-miR-6753-5p   |
| DCP2 | hsa-miR-8908-3p   |
| DCP2 | hsa-miR-2355-5p   |
| DCP2 | hsa-miR-128-3p    |
| DCP2 | hsa-miR-4516      |
| DCP2 | hsa-miR-651       |
| DCP2 | hsa-miR-542-5p    |
| DCP2 | hsa-miR-7865      |

|      |                  |
|------|------------------|
| DCP2 | hsa-miR-8069     |
| DCP2 | hsa-miR-1252-5p  |
| DCP2 | hsa-miR-892b     |
| DCP2 | hsa-miR-6793-3p  |
| DCP2 | hsa-miR-326-3p   |
| DCP2 | hsa-miR-548d-3p  |
| DCP2 | hsa-miR-182-3p   |
| DCP2 | hsa-miR-8071     |
| DCP2 | hsa-miR-6939-5p  |
| DCP2 | hsa-miR-6848-3p  |
| DCP2 | hsa-miR-545-3p   |
| DCP2 | hsa-miR-3595     |
| DCP2 | hsa-miR-351-5p   |
| DCP2 | hsa-miR-5007-3p  |
| DCP2 | hsa-miR-4645-3p  |
| DCP2 | hsa-miR-5003-3p  |
| DCP2 | hsa-miR-3127-5p  |
| DCP2 | hsa-miR-514b-5p  |
| DCP2 | hsa-miR-19b-3p   |
| DCP2 | hsa-miR-5132-5p  |
| DCP2 | hsa-miR-145-5p   |
| DCP2 | hsa-miR-206-3p   |
| DCP2 | hsa-miR-203-3p.1 |
| DCP2 | hsa-miR-6981-5p  |
| DCP2 | hsa-miR-3071-3p  |
| DCP2 | hsa-miR-2285h    |
| DCP2 | hsa-miR-129-5p   |
| DCP2 | hsa-miR-103-5p   |
| DCP2 | hsa-miR-6837-3p  |
| DCP2 | hsa-miR-138-1-3p |
| DCP2 | hsa-miR-411-5p.1 |
| DCP2 | hsa-miR-936      |
| DCP2 | hsa-miR-6388     |
| DCP2 | hsa-miR-4653-3p  |
| DCP2 | hsa-miR-7045-3p  |
| DCP2 | hsa-miR-4482-5p  |
| DCP2 | hsa-miR-7287-5p  |
| DCP2 | hsa-miR-8092     |
| DCP2 | hsa-miR-5195-5p  |
| DCP2 | hsa-miR-34bc-3p  |
| DCP2 | hsa-miR-6868-5p  |
| DCP2 | hsa-miR-4324     |
| DCP2 | hsa-miR-153-5p   |
| DCP2 | hsa-miR-7253-5p  |
| DCP2 | hsa-miR-299-5p   |
| DCP2 | hsa-miR-5192     |

|      |                  |
|------|------------------|
| DCP2 | hsa-miR-6871-3p  |
| DCP2 | hsa-miR-548t-3p  |
| DCP2 | hsa-miR-6917-3p  |
| DCP2 | hsa-miR-8831     |
| DCP2 | hsa-miR-1898     |
| DCP2 | hsa-miR-2332     |
| DCP2 | hsa-miR-2368-3p  |
| DCP2 | hsa-miR-1233-3p  |
| DCP2 | hsa-miR-204-3p   |
| DCP2 | hsa-miR-3182     |
| DCP2 | hsa-miR-7359-5p  |
| DCP2 | hsa-miR-922      |
| DCP2 | hsa-miR-185-5p   |
| DCP2 | hsa-miR-154b     |
| DCP2 | hsa-miR-706      |
| DCP2 | hsa-miR-1303     |
| DCP2 | hsa-miR-7092-3p  |
| DCP2 | hsa-miR-30c-2-3p |
| DCP2 | hsa-miR-372-5p   |
| DCP2 | hsa-miR-202-5p   |
| DCP2 | hsa-miR-23       |
| DCP2 | hsa-miR-1266-3p  |
| DCP2 | hsa-miR-33       |
| DCP2 | hsa-miR-7193-3p  |
| DCP2 | hsa-miR-2312     |
| DCP2 | hsa-miR-3136-5p  |
| DCP2 | hsa-miR-361-5p   |
| DCP2 | hsa-miR-323b-3p  |
| DCP2 | hsa-miR-1-3p     |
| DCP2 | hsa-miR-666-3p   |
| DCP2 | hsa-miR-619-5p   |
| DCP2 | hsa-miR-22-3p    |
| DCP2 | hsa-miR-2902     |
| DCP2 | hsa-miR-3652     |
| DCP2 | hsa-miR-101-3p   |
| DCP2 | hsa-miR-6986-3p  |
| DCP2 | hsa-miR-28-3p    |
| DCP2 | hsa-miR-548ax    |
| DCP2 | hsa-miR-2461-3p  |
| DCP2 | hsa-miR-7081-5p  |
| DCP2 | hsa-miR-3915     |
| DCP2 | hsa-miR-6130     |
| DCP2 | hsa-miR-7343-3p  |
| DCP2 | hsa-miR-216b     |
| DCP2 | hsa-miR-6418-3p  |
| DCP2 | hsa-miR-589-3p   |

|      |                   |
|------|-------------------|
| DCP2 | hsa-miR-6932-5p   |
| DCP2 | hsa-miR-6316      |
| DCP2 | hsa-miR-7392-3p   |
| DCP2 | hsa-miR-7064-3p   |
| DCP2 | hsa-miR-607       |
| DCP2 | hsa-miR-150-5p    |
| DCP2 | hsa-miR-7063-3p   |
| DCP2 | hsa-miR-505-3p.2  |
| DCP2 | hsa-miR-4742-5p   |
| DCP2 | hsa-miR-382-5p    |
| DCP2 | hsa-miR-603       |
| DCP2 | hsa-miR-7309-5p   |
| DCP2 | hsa-miR-2284s     |
| DCP2 | hsa-miR-181a-3p   |
| DCP2 | hsa-miR-3108-5p   |
| DCP2 | hsa-miR-5009-5p   |
| DCP2 | hsa-miR-577-5p    |
| DCP2 | hsa-miR-3689a-5p  |
| DCP2 | hsa-miR-181b-1-3p |
| DCP2 | hsa-miR-888-5p    |
| DCP2 | hsa-miR-1207-5p   |
| DCP2 | hsa-miR-2305      |
| DCP2 | hsa-miR-330-3p.2  |
| DCP2 | hsa-miR-3589      |
| DCP2 | hsa-miR-6830-5p   |
| DCP2 | hsa-miR-2285t     |
| DCP2 | hsa-miR-485-3p    |
| DCP2 | hsa-miR-703       |
| DCP2 | hsa-miR-2896      |
| DCP2 | hsa-miR-5193      |
| DCP2 | hsa-miR-6073      |
| DCP2 | hsa-miR-216c-5p   |
| DCP2 | hsa-miR-7014-5p   |
| DCP2 | hsa-miR-4685-5p   |
| DCP2 | hsa-miR-196b-3p   |
| DCP2 | hsa-miR-7010-3p   |
| DCP2 | hsa-miR-188-5p    |
| DCP2 | hsa-miR-7689-3p   |
| DCP2 | hsa-miR-7041-3p   |
| DCP2 | hsa-miR-633       |
| DCP2 | hsa-miR-6817-3p   |
| DCP2 | hsa-miR-5692a     |
| DCP2 | hsa-miR-26-2-3p   |
| DCP2 | hsa-miR-130       |
| DCP2 | hsa-miR-4423-5p   |
| DCP2 | hsa-miR-448-3p    |

|      |                    |
|------|--------------------|
| DCP2 | hsa-miR-3547-3p    |
| DCP2 | hsa-miR-548at-5p   |
| DCP2 | hsa-miR-5682       |
| DCP2 | hsa-miR-330-5p     |
| DCP2 | hsa-miR-4659a-3p   |
| DCP2 | hsa-miR-1287-3p    |
| DCP2 | hsa-miR-3167-5p    |
| DCP2 | hsa-miR-10b-3p     |
| DCP2 | hsa-miR-4305       |
| DCP2 | hsa-miR-96-5p      |
| DCP2 | hsa-miR-544a       |
| DCP2 | hsa-miR-6906-5p    |
| DCP2 | hsa-miR-7180-3p    |
| DCP2 | hsa-miR-3914       |
| DCP2 | hsa-miR-7032-3p    |
| DCP2 | hsa-miR-376c-5p    |
| DCP2 | hsa-miR-204-5p     |
| DCP2 | hsa-miR-4287       |
| DCP2 | hsa-miR-8869       |
| DCP2 | hsa-miR-7245-5p    |
| DCP2 | hsa-miR-2415-5p    |
| DCP2 | hsa-miR-520-3p     |
| DCP2 | hsa-miR-4501       |
| DCP2 | hsa-miR-562        |
| DCP2 | hsa-miR-613        |
| DCP2 | hsa-miR-802        |
| DCP2 | hsa-miR-669e-3p    |
| DCP2 | hsa-miR-3174       |
| DCP2 | hsa-miR-3137       |
| DCP2 | hsa-miR-6940-3p    |
| DCP2 | hsa-miR-3072-5p    |
| DCP2 | hsa-miR-7013-5p    |
| DCP2 | hsa-miR-1255b-2-3p |
| DCP2 | hsa-miR-126a-5p    |
| DCP2 | hsa-miR-8082       |
| DCP2 | hsa-miR-433-3p     |
| DCP2 | hsa-miR-411-5p     |
| DCP2 | hsa-miR-5621-3p    |
| DCP2 | hsa-miR-6809-5p    |
| DCP2 | hsa-miR-28-5p      |
| DCP2 | hsa-miR-7195-5p    |
| DCP2 | hsa-miR-6780a-3p   |
| DCP2 | hsa-miR-628-3p     |
| DCP2 | hsa-miR-7386a-3p   |
| DCP2 | hsa-miR-3159       |
| DCP2 | hsa-miR-4513       |



|      |                   |
|------|-------------------|
| DCP2 | hsa-miR-1247-5p   |
| DCP2 | hsa-miR-3529-3p   |
| DCP2 | hsa-miR-698-5p    |
| DCP2 | hsa-miR-3138      |
| DCP2 | hsa-miR-7334-3p   |
| DCP2 | hsa-miR-676-3p    |
| DCP2 | hsa-miR-1240      |
| DCP2 | hsa-miR-1258-5p   |
| DCP2 | hsa-miR-2284u     |
| DCP2 | hsa-miR-5093      |
| DCP2 | hsa-miR-3143      |
| DCP2 | hsa-miR-7214-5p   |
| DCP2 | hsa-miR-570-5p    |
| DCP2 | hsa-miR-3058-3p   |
| DCP2 | hsa-miR-934-5p    |
| DCP2 | hsa-miR-338-3p    |
| DCP2 | hsa-miR-3130-5p   |
| DCP2 | hsa-miR-4727-5p   |
| DCP2 | hsa-miR-6950-3p   |
| DCP2 | hsa-miR-8857      |
| DCP2 | hsa-miR-6770-5p   |
| DCP2 | hsa-miR-4736      |
| DCP2 | hsa-miR-142       |
| DCP2 | hsa-miR-567       |
| DCP2 | hsa-miR-3604      |
| DCP2 | hsa-miR-30e-3p    |
| DCP2 | hsa-miR-6808-5p   |
| DCP2 | hsa-miR-2365      |
| DCP2 | hsa-miR-495-5p    |
| DCP2 | hsa-miR-433       |
| DCP2 | hsa-miR-3658      |
| DCP2 | hsa-miR-4677-5p   |
| DCP2 | hsa-miR-4317      |
| DCP2 | hsa-miR-138-5p    |
| DCP2 | hsa-miR-7115-3p   |
| DCP2 | hsa-miR-8802      |
| DCP2 | hsa-miR-4659b-3p  |
| DCP2 | hsa-miR-466b-2-3p |
| DCP2 | hsa-miR-19-3p     |
| DCP2 | hsa-miR-138-2-3p  |
| DCP2 | hsa-miR-106       |
| DCP2 | hsa-miR-7641      |
| DCP2 | hsa-miR-4432      |
| DCP2 | hsa-miR-3150b-3p  |
| DCP2 | hsa-miR-7650-3p   |
| DCP2 | hsa-miR-4778-3p   |

|      |                  |
|------|------------------|
| DCP2 | hsa-miR-520g-3p  |
| DCP2 | hsa-miR-501-3p   |
| DCP2 | hsa-miR-8084     |
| DCP2 | hsa-miR-4683     |
| DCP2 | hsa-miR-350      |
| DCP2 | hsa-miR-29-5p    |
| DCP2 | hsa-miR-7280-5p  |
| DCP2 | hsa-miR-224-5p   |
| DCP2 | hsa-miR-19-5p    |
| DCP2 | hsa-miR-411a     |
| DCP2 | hsa-miR-4771     |
| DCP2 | hsa-miR-2292     |
| DCP2 | hsa-miR-1588     |
| DCP2 | hsa-miR-8865     |
| DCP2 | hsa-miR-107-5p   |
| DCP2 | hsa-miR-7072-3p  |
| DCP2 | hsa-miR-2285s    |
| DCP2 | hsa-miR-6902-5p  |
| DCP2 | hsa-miR-6504-3p  |
| DCP2 | hsa-miR-873-5p.1 |
| DCP2 | hsa-miR-4433b-3p |
| DCP2 | hsa-miR-3928-5p  |
| DCP2 | hsa-miR-6981-3p  |
| DCP2 | hsa-miR-302a-5p  |
| DCP2 | hsa-miR-767-5p   |
| DCP2 | hsa-miR-215      |
| DCP2 | hsa-miR-550b-3p  |
| DCP2 | hsa-miR-5088-3p  |
| DCP2 | hsa-miR-4766-3p  |
| DCP2 | hsa-miR-3061-3p  |
| DCP2 | hsa-miR-2284m    |
| DCP2 | hsa-miR-214-5p   |
| DCP2 | hsa-miR-519-3p   |
| DCP2 | hsa-miR-522-3p   |
| DCP2 | hsa-miR-1542-5p  |
| DCP2 | hsa-miR-1545c-3p |
| DCP2 | hsa-miR-3664-5p  |
| DCP2 | hsa-miR-7210-5p  |
| DCP2 | hsa-miR-1323-5p  |
| DCP2 | hsa-miR-3688-3p  |
| DCP2 | hsa-miR-1972     |
| DCP2 | hsa-miR-6631-5p  |
| DCP2 | hsa-miR-1238-3p  |
| DCP2 | hsa-miR-345-3p   |
| DCP2 | hsa-miR-7398p-5p |
| DCP2 | hsa-miR-1774     |

|      |                  |
|------|------------------|
| DCP2 | hsa-miR-6506-3p  |
| DCP2 | hsa-miR-98-3p    |
| DCP2 | hsa-miR-343      |
| DCP2 | hsa-miR-7398a-3p |
| DCP2 | hsa-miR-1265     |
| DCP2 | hsa-miR-1295b-5p |
| DCP2 | hsa-miR-6826-5p  |
| DCP2 | hsa-miR-4269     |
| DCP2 | hsa-miR-33-5p    |
| DCP2 | hsa-miR-7113-5p  |
| DCP2 | hsa-miR-2284x    |
| DCP2 | hsa-miR-7052-3p  |
| DCP2 | hsa-miR-4789-3p  |
| DCP2 | hsa-miR-1206     |
| DCP2 | hsa-miR-499b-3p  |
| DCP2 | hsa-miR-1902     |
| DCP2 | hsa-miR-6931-3p  |
| DCP2 | hsa-miR-6079     |
| DCP2 | hsa-miR-4695-3p  |
| DCP2 | hsa-miR-4763-5p  |
| DCP2 | hsa-miR-218-5p   |
| DCP2 | hsa-miR-627-3p   |
| DCP2 | hsa-miR-676-5p   |
| DCP2 | hsa-miR-497-5p   |
| DCP2 | hsa-miR-6417     |
| DCP2 | hsa-miR-197-3p   |
| DCP2 | hsa-miR-878      |
| DCP2 | hsa-miR-577      |
| DCP2 | hsa-miR-4464     |
| DCP2 | hsa-miR-7078-5p  |
| DCP2 | hsa-miR-2293     |
| DCP2 | hsa-miR-216-3p   |
| DCP2 | hsa-miR-4768-3p  |
| DCP2 | hsa-miR-6883-3p  |
| DCP2 | hsa-miR-8898     |
| DCP2 | hsa-miR-3973     |
| DCP2 | hsa-miR-7198-3p  |
| DCP2 | hsa-miR-153-3p   |
| DCP2 | hsa-miR-6792-5p  |
| DCP2 | hsa-miR-154-5p   |
| DCP2 | hsa-miR-7188-3p  |
| DCP2 | hsa-miR-3074-3p  |
| DCP2 | hsa-miR-4654     |
| DCP2 | hsa-miR-650d     |
| DCP2 | hsa-miR-5572     |
| DCP2 | hsa-miR-1545b-3p |

|      |                      |
|------|----------------------|
| DCP2 | hsa-miR-7358-3p      |
| DCP2 | hsa-miR-520gh        |
| DCP2 | hsa-miR-1250-3p      |
| DCP2 | hsa-miR-217-5p       |
| DCP2 | hsa-miR-3680-3p      |
| DCP2 | hsa-miR-7017-3p      |
| DCP2 | hsa-miR-361-5p       |
| DCP2 | hsa-miR-4716-5p      |
| DCP2 | hsa-miR-5110         |
| DCP2 | hsa-miR-3140-5p      |
| DCP2 | hsa-miR-212-3p       |
| DCP2 | hsa-miR-203-3p       |
| DCP2 | hsa-miR-15           |
| DCP2 | hsa-miR-331-3p       |
| DCP2 | hsa-miR-8077         |
| DCP2 | hsa-miR-6332         |
| DCP2 | hsa-miR-133b         |
| DCP2 | hsa-miR-3089-3p      |
| DCP2 | hsa-miR-875-5p       |
| DCP2 | hsa-miR-135a-1-3p    |
| DCP2 | hsa-miR-8110         |
| DCP2 | hsa-miR-7004-3p      |
| DCP2 | hsa-miR-93-3p        |
| DCP2 | hsa-miR-2284a        |
| DCP2 | hsa-miR-190b-3p      |
| DCP2 | hsa-miR-211-3p       |
| DCP2 | hsa-miR-4729         |
| DCP2 | hsa-miR-2352         |
| DCP2 | hsa-miR-7163-5p      |
| DCP2 | hsa-miR-224-3p       |
| DCP2 | hsa-miR-6857-3p      |
| DCP2 | hsa-miR-7219-5p      |
| DCP2 | hsa-miR-670-5p       |
| DCP2 | hsa-miR-151-3p       |
| DCP2 | hsa-miR-7668-5p      |
| DCP2 | hsa-miR-7667-3p      |
| DCP2 | hsa-miR-336-5p       |
| DCP2 | hsa-miR-3101-3p      |
| DCP2 | hsa-miR-3117-5p      |
| DCP2 | hsa-miR-3977         |
| DCP2 | hsa-miR-6519         |
| DCP2 | hsa-miR-3102-3p.2-3p |
| DCP2 | hsa-miR-5623-3p      |
| DCP2 | hsa-miR-5010-3p      |
| DCP2 | hsa-miR-133-5p       |
| DCP2 | hsa-miR-6071         |

|      |                  |
|------|------------------|
| DCP2 | hsa-miR-302-3p   |
| DCP2 | hsa-miR-513a-3p  |
| DCP2 | hsa-miR-548ak    |
| DCP2 | hsa-miR-8863     |
| DCP2 | hsa-miR-9b-3p    |
| DCP2 | hsa-miR-7236-5p  |
| DCP2 | hsa-miR-9-5p     |
| DCP2 | hsa-miR-141-3p   |
| DCP2 | hsa-miR-526b-5p  |
| DCP2 | hsa-miR-6128     |
| DCP2 | hsa-miR-548b-5p  |
| DCP2 | hsa-miR-4666a-5p |
| DCP2 | hsa-miR-548au-5p |
| DCP2 | hsa-miR-7646-3p  |
| DCP2 | hsa-miR-7205-3p  |
| DCP2 | hsa-miR-943      |
| DCP2 | hsa-miR-196a-3p  |
| DCP2 | hsa-miR-6330     |
| DCP2 | hsa-miR-6996-3p  |
| DCP2 | hsa-miR-2284-3p  |
| DCP2 | hsa-miR-7254-5p  |
| DCP2 | hsa-miR-302-5p   |
| DCP2 | hsa-miR-3140-3p  |
| DCP2 | hsa-miR-6742-3p  |
| DCP2 | hsa-miR-2284ac   |
| DCP2 | hsa-miR-1180-5p  |
| DCP2 | hsa-miR-3587     |
| DCP2 | hsa-miR-4776-3p  |
| DCP2 | hsa-miR-6503-3p  |
| DCP2 | hsa-miR-133-3p   |
| DCP2 | hsa-miR-7246-5p  |
| DCP2 | hsa-miR-1287-5p  |
| DCP2 | hsa-miR-1237-3p  |
| DCP2 | hsa-miR-5125-5p  |
| DCP2 | hsa-miR-7670-5p  |
| DCP2 | hsa-miR-3470a    |
| DCP2 | hsa-miR-548j-5p  |
| DCP2 | hsa-miR-122      |
| DCP2 | hsa-miR-466b-3p  |
| DCP2 | hsa-miR-7383-5p  |
| DCP2 | hsa-miR-642      |
| DCP2 | hsa-miR-139-3p   |
| DCP2 | hsa-miR-3117-3p  |
| DCP2 | hsa-miR-3607-3p  |
| DCP2 | hsa-miR-6989-3p  |
| DCP2 | hsa-miR-7307-5p  |

|      |                  |
|------|------------------|
| DCP2 | hsa-miR-1929-5p  |
| DCP2 | hsa-miR-7399-5p  |
| DCP2 | hsa-miR-3929     |
| DCP2 | hsa-miR-6571-5p  |
| DCP2 | hsa-miR-6515-5p  |
| DCP2 | hsa-miR-4687-5p  |
| DCP2 | hsa-miR-137-3p   |
| DCP2 | hsa-miR-208a-5p  |
| DCP2 | hsa-miR-7339-5p  |
| DCP2 | hsa-miR-7222-3p  |
| DCP2 | hsa-miR-7049-5p  |
| DCP2 | hsa-miR-7016-3p  |
| DCP2 | hsa-miR-470-3p   |
| DCP2 | hsa-miR-4276     |
| DCP2 | hsa-miR-200bc    |
| DCP2 | hsa-miR-6911-3p  |
| DCP2 | hsa-miR-4325     |
| DCP2 | hsa-miR-6813-5p  |
| DCP2 | hsa-miR-577-3p   |
| DCP2 | hsa-miR-325-3p   |
| DCP2 | hsa-miR-7360-5p  |
| DCP2 | hsa-miR-742-3p   |
| DCP2 | hsa-miR-378j     |
| DCP2 | hsa-miR-4732-3p  |
| DCP2 | hsa-miR-6728-3p  |
| DCP2 | hsa-miR-8829     |
| DCP2 | hsa-miR-548av-3p |
| DCP2 | hsa-miR-7175-3p  |
| DCP2 | hsa-miR-136-5p   |
| DCP2 | hsa-miR-495-3p   |
| DCP2 | hsa-miR-2470     |
| DCP2 | hsa-miR-9-3p     |
| DCP2 | hsa-miR-1892     |
| DCP2 | hsa-miR-7175-5p  |
| DCP2 | hsa-miR-98-5p    |
| DCP2 | hsa-miR-6876-3p  |
| DCP2 | hsa-miR-7385b-3p |
| DCP2 | hsa-miR-7077-3p  |
| DCP2 | hsa-miR-339-5p   |
| DCP2 | hsa-miR-4704-3p  |
| DCP2 | hsa-miR-205-3p   |
| DCP2 | hsa-miR-4709-3p  |
| DCP2 | hsa-miR-4504     |
| DCP2 | hsa-miR-641      |
| DCP2 | hsa-miR-578      |
| DCP2 | hsa-miR-6791-3p  |

|      |                  |
|------|------------------|
| DCP2 | hsa-miR-1839-3p  |
| DCP2 | hsa-miR-690      |
| DCP2 | hsa-miR-2298     |
| DCP2 | hsa-miR-548c-3p  |
| DCP2 | hsa-miR-6400     |
| DCP2 | hsa-miR-26       |
| DCP2 | hsa-miR-548h-3p  |
| DCP2 | hsa-miR-873-5p   |
| DCP2 | hsa-miR-374c-5p  |
| DCP2 | hsa-miR-7843-3p  |
| DCP2 | hsa-miR-7301-5p  |
| DCP2 | hsa-miR-6529b    |
| DCP2 | hsa-miR-7373b-3p |
| DCP2 | hsa-miR-508-3p   |
| DCP2 | hsa-miR-184-5p   |
| DCP2 | hsa-miR-7088-5p  |
| DCP2 | hsa-miR-6119-3p  |
| DCP2 | hsa-miR-6937-5p  |
| DCP2 | hsa-miR-1269a    |
| DCP2 | hsa-miR-7660-3p  |
| DCP2 | hsa-miR-4266     |
| DCP2 | hsa-miR-152-5p   |
| DCP2 | hsa-miR-8847     |
| DCP2 | hsa-miR-107      |
| DCP2 | hsa-miR-5581-3p  |
| DCP2 | hsa-miR-5132-3p  |
| DCP2 | hsa-miR-222-3p   |
| DCP2 | hsa-miR-4765     |
| DCP2 | hsa-miR-337-3p   |
| DCP2 | hsa-miR-344a-3p  |
| DCP2 | hsa-miR-8055     |
| DCP2 | hsa-miR-4795-3p  |
| DCP2 | hsa-miR-615-3p   |
| DCP2 | hsa-miR-377-3p   |
| DCP2 | hsa-miR-5582-5p  |
| DCP2 | hsa-miR-2442     |
| DCP2 | hsa-miR-504-3p   |
| DCP2 | hsa-miR-7243-3p  |
| DCP2 | hsa-miR-873-5p   |
| DCP2 | hsa-miR-2441     |
| DCP2 | hsa-miR-7232-5p  |
| DCP2 | hsa-miR-15c-3p   |
| DCP2 | hsa-miR-6880-5p  |
| DCP2 | hsa-miR-5622-3p  |
| DCP2 | hsa-miR-548i     |
| DCP2 | hsa-miR-5118     |

|      |                   |
|------|-------------------|
| DCP2 | hsa-miR-6754-5p   |
| DCP2 | hsa-miR-7166-5p   |
| DCP2 | hsa-miR-650abc    |
| DCP2 | hsa-miR-548am-5p  |
| DCP2 | hsa-miR-7050-3p   |
| DCP2 | hsa-miR-7053-3p   |
| DCP2 | hsa-miR-541-5p    |
| DCP2 | hsa-miR-764-5p    |
| DCP2 | hsa-miR-6717-5p   |
| DCP2 | hsa-miR-1962      |
| DCP2 | hsa-miR-7048-3p   |
| DCP2 | hsa-miR-7156-5p   |
| DCP2 | hsa-miR-8074      |
| DCP2 | hsa-miR-3692-3p   |
| DCP2 | hsa-miR-2345      |
| DCP2 | hsa-miR-215-3p    |
| DCP2 | hsa-miR-761       |
| DCP2 | hsa-miR-143-3p    |
| DCP2 | hsa-miR-29a-3p    |
| DCP2 | hsa-miR-4461      |
| DCP2 | hsa-miR-3691-5p   |
| DCP2 | hsa-miR-6836-3p   |
| DCP2 | hsa-miR-21-5p     |
| DCP2 | hsa-miR-128       |
| DCP2 | hsa-miR-3622a-5p  |
| DCP2 | hsa-miR-181a-2-3p |
| DCP2 | hsa-miR-5619-5p   |
| DCP2 | hsa-miR-4272      |
| DCP2 | hsa-miR-2416      |
| DCP2 | hsa-miR-424-5p    |
| DCP2 | hsa-miR-7174-5p   |
| DCP2 | hsa-miR-548f-3p   |
| DCP2 | hsa-miR-4260      |
| DCP2 | hsa-miR-7157-5p   |
| DCP2 | hsa-miR-450b-5p   |
| DCP2 | hsa-miR-548j-3p   |
| DCP2 | hsa-miR-4670-3p   |
| DCP2 | hsa-miR-4709-5p   |
| DCP2 | hsa-miR-1271-3p   |
| DCP2 | hsa-miR-410-3p    |
| DCP2 | hsa-miR-8888      |
| DCP2 | hsa-miR-2446      |
| DCP2 | hsa-miR-6972-3p   |
| DCP2 | hsa-miR-2115-3p   |
| DCP2 | hsa-miR-758-5p    |
| DCP2 | hsa-miR-550a-3-5p |



|      |                  |
|------|------------------|
| DCP2 | hsa-miR-7285-5p  |
| DCP2 | hsa-miR-7398k-5p |
| DCP2 | hsa-miR-3689e    |
| DCP2 | hsa-miR-6403     |
| DCP2 | hsa-miR-6985-5p  |
| DCP2 | hsa-miR-2285u    |
| DCP2 | hsa-miR-6862-5p  |
| DCP2 | hsa-miR-582-5p   |
| DCP2 | hsa-miR-6529a    |
| DCP2 | hsa-miR-552      |
| DCP2 | hsa-miR-2284k    |
| DCP2 | hsa-miR-3150a-5p |
| DCP2 | hsa-miR-6842-5p  |
| DCP2 | hsa-miR-376b-3p  |
| DCP2 | hsa-miR-7001-3p  |
| DCP2 | hsa-miR-3117-3p  |
| DCP2 | hsa-miR-557      |
| DCP2 | hsa-miR-702-3p   |
| DCP2 | hsa-miR-6541     |
| DCP2 | hsa-miR-674-3p   |
| DCP2 | hsa-miR-32-3p    |
| DCP2 | hsa-miR-4515     |
| DCP2 | hsa-miR-140-5p   |
| DCP2 | hsa-miR-651-3p   |
| DCP2 | hsa-miR-7297-5p  |
| DCP2 | hsa-miR-194-3p   |
| DCP2 | hsa-miR-6127     |
| DCP2 | hsa-miR-3692-5p  |
| DCP2 | hsa-miR-548n     |
| DCP2 | hsa-miR-2285e    |
| DCP2 | hsa-miR-4530     |
| DCP2 | hsa-miR-195-5p   |
| DCP2 | hsa-miR-7-3p     |
| DCP2 | hsa-miR-338-5p   |
| DCP2 | hsa-miR-1388-3p  |
| DCP2 | hsa-miR-200c-5p  |
| DCP2 | hsa-miR-4470     |
| DCP2 | hsa-miR-6536     |
| DCP2 | hsa-miR-140-3p.1 |
| DCP2 | hsa-miR-8836     |
| DCP2 | hsa-miR-1271-5p  |
| DCP2 | hsa-miR-489      |
| DCP2 | hsa-miR-6534     |
| DCP2 | hsa-miR-510-5p   |
| DCP2 | hsa-miR-224-5p   |
| DCP2 | hsa-miR-4780     |

|      |                  |
|------|------------------|
| DCP2 | hsa-miR-6771-3p  |
| DCP2 | hsa-miR-1542-3p  |
| DCP2 | hsa-miR-2329-3p  |
| DCP2 | hsa-miR-3585-5p  |
| DCP2 | hsa-miR-4668-5p  |
| DCP2 | hsa-miR-7328-5p  |
| DCP2 | hsa-miR-4286     |
| DCP2 | hsa-miR-6768-5p  |
| DCP2 | hsa-miR-3105-3p  |
| DCP2 | hsa-miR-2284-5p  |
| DCP2 | hsa-miR-3617-5p  |
| DCP2 | hsa-miR-92a-2-5p |
| DCP2 | hsa-miR-141-3p   |
| DCP2 | hsa-miR-6729-3p  |
| DCP2 | hsa-miR-27       |
| DCP2 | hsa-miR-215-5p   |
| DCP2 | hsa-miR-7009-3p  |
| DCP2 | hsa-miR-3103-3p  |
| DCP2 | hsa-miR-548e-3p  |
| DCP2 | hsa-miR-4679     |
| DCP2 | hsa-miR-7386i-3p |
| DCP2 | hsa-miR-7657-5p  |
| DCP2 | hsa-miR-1290     |
| DCP2 | hsa-miR-570-3p   |
| DCP2 | hsa-miR-1264-3p  |
| DCP2 | hsa-miR-7226-5p  |
| DCP2 | hsa-miR-2331-3p  |
| DCP2 | hsa-miR-4637     |
| DCP2 | hsa-miR-2406     |
| DCP2 | hsa-miR-1283a    |
| DCP2 | hsa-miR-7158-3p  |
| DCP2 | hsa-miR-141-5p   |
| DCP2 | hsa-miR-5002-3p  |
| DCP2 | hsa-miR-367-5p   |
| DCP2 | hsa-miR-6859-5p  |
| DCP2 | hsa-miR-7083-3p  |
| DCP2 | hsa-miR-4290     |
| DCP2 | hsa-miR-7398t-3p |
| DCP2 | hsa-miR-23b-3p   |
| DCP2 | hsa-miR-448      |
| DCP2 | hsa-miR-27b-5p   |
| DCP2 | hsa-miR-2284i    |
| DCP2 | hsa-miR-3671     |
| DCP2 | hsa-miR-6896-3p  |
| DCP2 | hsa-miR-7348-5p  |
| DCP2 | hsa-miR-4711-5p  |

|      |                   |
|------|-------------------|
| DCP2 | hsa-miR-6924-3p   |
| DCP2 | hsa-miR-138-5p    |
| DCP2 | hsa-miR-569       |
| DCP2 | hsa-miR-548ae-3p  |
| DCP2 | hsa-miR-5571-3p   |
| DCP2 | hsa-miR-1896      |
| DCP2 | hsa-miR-455-3p.2  |
| DCP2 | hsa-miR-6886-3p   |
| DCP2 | hsa-miR-873-5p.2  |
| DCP2 | hsa-miR-576-5p    |
| DCP2 | hsa-miR-4646-3p   |
| DCP2 | hsa-miR-2284c     |
| DCP2 | hsa-miR-206-5p    |
| DCP2 | hsa-miR-323a-3p   |
| DCP2 | hsa-miR-7243-5p   |
| DCP2 | hsa-miR-2285c     |
| DCP2 | hsa-miR-4799-5p   |
| DCP2 | hsa-miR-628-3p    |
| DCP2 | hsa-miR-547-3p    |
| DCP2 | hsa-miR-450b      |
| DCP2 | hsa-miR-1277-5p   |
| DCP2 | hsa-miR-872       |
| DCP2 | hsa-miR-7188-5p   |
| DCP2 | hsa-miR-548f-5p   |
| DCP2 | hsa-miR-5580-3p   |
| DCP2 | hsa-miR-2339      |
| DCP2 | hsa-miR-6913-3p   |
| DCP2 | hsa-miR-7015-3p   |
| DCP2 | hsa-miR-146-5p    |
| DCP2 | hsa-miR-548z      |
| DCP2 | hsa-miR-4680      |
| DCP2 | hsa-miR-7323-3p   |
| DCP2 | hsa-miR-410       |
| DCP2 | hsa-miR-8904b     |
| DCP2 | hsa-miR-218a-2-3p |
| DCP2 | hsa-miR-1460      |
| DCP2 | hsa-miR-188-5p    |
| DCP2 | hsa-miR-7398n-5p  |
| DCP2 | hsa-miR-373-3p    |
| DCP2 | hsa-miR-5583-5p   |
| DCP2 | hsa-miR-8064      |
| DCP2 | hsa-miR-338-3p    |
| DCP2 | hsa-miR-28-5p     |
| DCP2 | hsa-miR-6516-3p   |
| DCP2 | hsa-miR-7356-5p   |
| DCP2 | hsa-miR-7207-5p   |

|      |                   |
|------|-------------------|
| DCP2 | hsa-miR-4791      |
| DCP2 | hsa-miR-4662a-3p  |
| DCP2 | hsa-miR-7213-3p   |
| DCP2 | hsa-miR-6953-5p   |
| DCP2 | hsa-miR-3689d     |
| DCP2 | hsa-miR-1843      |
| DCP2 | hsa-miR-7258-3p   |
| DCP2 | hsa-miR-532-5p    |
| DCP2 | hsa-miR-7183-5p   |
| DCP2 | hsa-miR-4434      |
| DCP2 | hsa-miR-3113-3p   |
| DCP2 | hsa-miR-8793      |
| DCP2 | hsa-miR-2472      |
| DCP2 | hsa-miR-4755-5p   |
| DCP2 | hsa-miR-9-3-3p    |
| DCP2 | hsa-miR-7665-3p   |
| DCP2 | hsa-miR-509-5p    |
| DCP2 | hsa-miR-148       |
| DCP2 | hsa-miR-6930-5p   |
| DCP2 | hsa-miR-142-5p    |
| DCP2 | hsa-miR-130a-5p   |
| DCP2 | hsa-miR-548y      |
| DCP2 | hsa-miR-6970-5p   |
| DCP2 | hsa-miR-376-3p    |
| DCP2 | hsa-miR-6515-3p   |
| DCP2 | hsa-miR-525-5p    |
| DCP2 | hsa-miR-2375      |
| DCP2 | hsa-miR-1547-3p   |
| DCP2 | hsa-miR-23a-3p    |
| DCP2 | hsa-miR-323b-5p   |
| DCP2 | hsa-miR-3121-5p   |
| DCP2 | hsa-miR-3079-3p   |
| DCP2 | hsa-miR-6359      |
| DCP2 | hsa-miR-200ac-5p  |
| DCP2 | hsa-miR-6866-5p   |
| DCP2 | hsa-miR-892-3p    |
| DCP2 | hsa-miR-1208      |
| DCP2 | hsa-miR-2429      |
| DCP2 | hsa-miR-5009-3p   |
| DCP2 | hsa-miR-5589-5p   |
| DCP2 | hsa-miR-2284aa    |
| DCP2 | hsa-miR-219a-1-3p |
| DCP2 | hsa-miR-130a-3p   |
| DCP2 | hsa-miR-1178-5p   |
| DCP2 | hsa-miR-136-5p    |
| DCP2 | hsa-miR-7241-5p   |

|      |                 |
|------|-----------------|
| DCP2 | hsa-miR-2440    |
| DCP2 | hsa-miR-3473c   |
| DCP2 | hsa-miR-199a-3p |
| DCP2 | hsa-miR-4311    |
| DCP2 | hsa-miR-7864    |
| DCP2 | hsa-miR-6399    |
| DCP2 | hsa-miR-1546-3p |
| DCP2 | hsa-miR-7316-5p |
| DCP2 | hsa-miR-7444-5p |
| DCP2 | hsa-miR-6870-5p |
| DCP2 | hsa-miR-6858-5p |
| DCP2 | hsa-miR-29b-3p  |
| DCP2 | hsa-miR-3548    |
| DCP2 | hsa-miR-130b-5p |
| DCP2 | hsa-miR-5693    |
| DCP2 | hsa-miR-7313-3p |
| DCP2 | hsa-miR-3098-5p |
| DCP2 | hsa-miR-3201    |
| DCP2 | hsa-miR-7161-5p |
| DCP2 | hsa-miR-6937-3p |
| DCP2 | hsa-let-7a-3p   |
| DCP2 | hsa-miR-6873-3p |
| DCP2 | hsa-miR-8119    |
| DCP2 | hsa-miR-322-3p  |
| DCP2 | hsa-miR-548a-5p |
| DCP2 | hsa-miR-340-5p  |
| DCP2 | hsa-miR-3675-3p |
| DCP2 | hsa-miR-378d    |
| DCP2 | hsa-miR-7360-3p |
| DCP2 | hsa-miR-292a-3p |
| DCP2 | hsa-miR-6999-5p |
| DCP2 | hsa-miR-466c-3p |
| DCP2 | hsa-miR-371     |
| DCP2 | hsa-miR-6856-5p |
| DCP2 | hsa-miR-4291    |
| DCP2 | hsa-miR-6976-3p |
| DCP2 | hsa-miR-7200-5p |
| DCP2 | hsa-miR-653-5p  |
| DCP2 | hsa-miR-196-3p  |
| DCP2 | hsa-miR-7685-3p |
| DCP2 | hsa-miR-155-5p  |
| DCP2 | hsa-miR-2285aa  |
| DCP2 | hsa-miR-26-3p   |
| DCP2 | hsa-miR-3551-5p |
| DCP2 | hsa-miR-580     |
| DCP2 | hsa-miR-4693-5p |

|      |                  |
|------|------------------|
| DCP2 | hsa-miR-1183     |
| DCP2 | hsa-miR-3664-5p  |
| DCP2 | hsa-miR-6506-5p  |
| DCP2 | hsa-miR-331-5p   |
| DCP2 | hsa-miR-455-3p   |
| DCP2 | hsa-miR-7257-3p  |
| DCP2 | hsa-miR-921      |
| DCP2 | hsa-miR-8056     |
| DCP2 | hsa-miR-7397-5p  |
| DCP2 | hsa-miR-7119-5p  |
| DCP2 | hsa-miR-421-5p   |
| DCP2 | hsa-miR-193b-5p  |
| DCP2 | hsa-miR-6348     |
| DCP2 | hsa-miR-4687-3p  |
| DCP2 | hsa-miR-3612     |
| DCP2 | hsa-miR-3682-3p  |
| DCP2 | hsa-miR-6906-3p  |
| DCP2 | hsa-miR-6120-5p  |
| DCP2 | hsa-miR-3096-5p  |
| DCP2 | hsa-miR-3129-3p  |
| DCP2 | hsa-miR-7396-5p  |
| DCP2 | hsa-miR-5000-5p  |
| DCP2 | hsa-miR-627      |
| DCP2 | hsa-miR-6916-5p  |
| DCP2 | hsa-miR-101-1-5p |
| DCP2 | hsa-miR-329-3p   |
| DCP2 | hsa-miR-1279     |
| DCP2 | hsa-miR-634      |
| DCP2 | hsa-miR-365b-5p  |
| DCP2 | hsa-miR-6926-5p  |
| DCP2 | hsa-miR-3163     |
| DCP2 | hsa-miR-7370-5p  |
| DCP2 | hsa-miR-8052     |
| DCP2 | hsa-miR-196c-3p  |
| DCP2 | hsa-miR-7312-3p  |
| DCP2 | hsa-miR-4647     |
| DCP2 | hsa-miR-3098-3p  |
| DCP2 | hsa-miR-573      |
| DCP2 | hsa-miR-7355-5p  |
| DCP2 | hsa-miR-496b     |
| DCP2 | hsa-miR-766-3p   |
| DCP2 | hsa-miR-30-5p    |
| DCP2 | hsa-miR-7294-3p  |
| DCP2 | hsa-miR-149-3p   |
| DCP2 | hsa-miR-6773-3p  |
| DCP2 | hsa-miR-7688-3p  |

|      |                  |
|------|------------------|
| DCP2 | hsa-miR-3121-3p  |
| DCP2 | hsa-miR-378-5p   |
| DCP2 | hsa-miR-4641     |
| DCP2 | hsa-miR-1296-3p  |
| DCP2 | hsa-miR-6828-5p  |
| DCP2 | hsa-miR-2465     |
| DCP2 | hsa-miR-7b-3p    |
| DCP2 | hsa-miR-133a-5p  |
| DCP2 | hsa-miR-148b-3p  |
| DCP2 | hsa-miR-203      |
| DCP2 | hsa-miR-6785-5p  |
| DCP2 | hsa-miR-4422     |
| DCP2 | hsa-miR-6734-3p  |
| DCP2 | hsa-miR-548x-5p  |
| DCP2 | hsa-miR-500a-3p  |
| DCP2 | hsa-miR-7106-5p  |
| DCP2 | hsa-miR-409      |
| DCP2 | hsa-miR-1582     |
| DCP2 | hsa-miR-669m-5p  |
| DCP2 | hsa-miR-7366-5p  |
| DCP2 | hsa-miR-508a     |
| DCP2 | hsa-miR-200a-5p  |
| DCP2 | hsa-miR-8846     |
| DCP2 | hsa-miR-4436b-5p |
| DCP2 | hsa-miR-548      |
| DCP2 | hsa-miR-632      |
| DCP2 | hsa-miR-7973     |
| DCP2 | hsa-miR-584-3p   |
| DCP2 | hsa-miR-7394b-5p |
| DCP2 | hsa-miR-7321-3p  |
| DCP2 | hsa-miR-7387-3p  |
| DCP2 | hsa-miR-891a-3p  |
| DCP2 | hsa-miR-6129     |
| DCP2 | hsa-miR-3557-3p  |
| DCP2 | hsa-miR-3685     |
| DCP2 | hsa-miR-383      |
| DCP2 | hsa-miR-5700     |
| DCP2 | hsa-miR-380-5p   |
| DCP2 | hsa-miR-6722-3p  |
| DCP2 | hsa-miR-5008-3p  |
| DCP2 | hsa-miR-7377-3p  |
| DCP2 | hsa-miR-548aw    |
| DCP2 | hsa-miR-7681-3p  |
| DCP2 | hsa-miR-2399-5p  |
| DCP2 | hsa-miR-532-5p   |
| DCP2 | hsa-miR-539-5p   |

|      |                  |
|------|------------------|
| DCP2 | hsa-miR-935      |
| DCP2 | hsa-miR-519e-3p  |
| DCP2 | hsa-miR-7244-3p  |
| DCP2 | hsa-miR-148a-3p  |
| DCP2 | hsa-miR-3572     |
| DCP2 | hsa-miR-1273g-3p |
| DCP2 | hsa-miR-6855-5p  |
| DCP2 | hsa-miR-4297     |
| DCP2 | hsa-miR-3679-3p  |
| DCP2 | hsa-miR-1324     |
| DCP2 | hsa-miR-1468-5p  |
| DCP2 | hsa-miR-6867-3p  |
| DCP2 | hsa-miR-7398r-5p |
| DCP2 | hsa-miR-8093     |
| DCP2 | hsa-miR-450b-3p  |
| DCP2 | hsa-miR-6736-3p  |
| DCP2 | hsa-miR-2387     |
| DCP2 | hsa-miR-7217-3p  |
| DCP2 | hsa-miR-4746-3p  |
| DCP2 | hsa-miR-145-5p   |
| DCP2 | hsa-miR-517      |
| DCP2 | hsa-miR-20-5p    |
| DCP2 | hsa-miR-499-5p   |
| DCP2 | hsa-miR-2313-3p  |
| DCP2 | hsa-miR-550      |
| DCP2 | hsa-miR-7230-5p  |
| DCP2 | hsa-miR-6546-5p  |
| DCP2 | hsa-miR-125      |
| DCP2 | hsa-miR-2390     |
| DCP2 | hsa-miR-6932-3p  |
| DCP2 | hsa-miR-149-5p   |
| DCP2 | hsa-miR-2397-3p  |
| DCP2 | hsa-miR-34c-3p   |
| DCP2 | hsa-miR-6975-3p  |
| DCP2 | hsa-miR-513c-3p  |
| DCP2 | hsa-miR-5119     |
| DCP2 | hsa-miR-3569-3p  |
| DCP2 | hsa-miR-4671-3p  |
| DCP2 | hsa-miR-6889-3p  |
| DCP2 | hsa-miR-2486-3p  |
| DCP2 | hsa-miR-548az-3p |
| DCP2 | hsa-miR-7268-5p  |
| DCP2 | hsa-miR-3069-3p  |
| DCP2 | hsa-miR-1249-3p  |
| DCP2 | hsa-miR-7374b-3p |
| DCP2 | hsa-miR-210      |



|      |                  |
|------|------------------|
| DCP2 | hsa-miR-374b-5p  |
| DCP2 | hsa-miR-431-5p   |
| DCP2 | hsa-miR-7304-3p  |
| DCP2 | hsa-miR-6813-3p  |
| DCP2 | hsa-miR-6944-3p  |
| DCP2 | hsa-miR-27a-5p   |
| DCP2 | hsa-miR-29a-5p   |
| DCP2 | hsa-miR-6122-3p  |
| DCP2 | hsa-miR-6934-3p  |
| DCP2 | hsa-miR-1292-3p  |
| DCP2 | hsa-miR-548ac    |
| DCP2 | hsa-miR-6947-3p  |
| DCP2 | hsa-miR-7227-3p  |
| DCP2 | hsa-miR-190a-3p  |
| DCP2 | hsa-miR-7480-5p  |
| DCP2 | hsa-miR-5589-3p  |
| DCP2 | hsa-miR-548ae-5p |
| DCP2 | hsa-miR-589-5p   |
| DCP2 | hsa-miR-3091-5p  |
| DCP2 | hsa-miR-425-5p   |
| DCP2 | hsa-miR-467-3p   |
| DCP2 | hsa-miR-3120-5p  |
| DCP2 | hsa-miR-488-3p   |
| DCP2 | hsa-miR-6847-3p  |
| DCP2 | hsa-miR-191-3p   |
| DCP2 | hsa-miR-382-5p   |
| DCP2 | hsa-miR-5108     |
| DCP2 | hsa-miR-6954-5p  |
| DCP2 | hsa-miR-374c-3p  |
| DCP2 | hsa-miR-2319     |
| DCP2 | hsa-miR-200a-3p  |
| DCP2 | hsa-miR-7370i-3p |
| DCP2 | hsa-miR-466-5p   |
| DCP2 | hsa-miR-6326     |
| DCP2 | hsa-miR-7844-5p  |
| DCP2 | hsa-miR-3474     |
| DCP2 | hsa-miR-6795-3p  |
| DCP2 | hsa-miR-344c-3p  |
| DCP2 | hsa-miR-105-5p   |
| DCP2 | hsa-miR-7669-5p  |
| DCP2 | hsa-miR-5616-3p  |
| DCP2 | hsa-miR-7012-3p  |
| DCP2 | hsa-miR-199b-3p  |
| DCP2 | hsa-miR-1912-5p  |
| DCP2 | hsa-miR-20b-3p   |
| DCP2 | hsa-miR-429-5p   |

|      |                   |
|------|-------------------|
| DCP2 | hsa-miR-548ah-5p  |
| DCP2 | hsa-miR-6511-5p   |
| DCP2 | hsa-miR-212-3p    |
| DCP2 | hsa-miR-8821      |
| DCP2 | hsa-miR-4676-5p   |
| DCP2 | hsa-miR-216a-3p   |
| DCP2 | hsa-miR-5098      |
| DCP2 | hsa-miR-2420      |
| DCP2 | hsa-miR-6526      |
| DCP2 | hsa-miR-1276      |
| DCP2 | hsa-miR-411-3p    |
| DCP2 | hsa-miR-543-5p    |
| DCP2 | hsa-miR-6909-3p   |
| DCP2 | hsa-miR-7011-3p   |
| DCP2 | hsa-miR-742-5p    |
| DCP2 | hsa-miR-548ba     |
| DCP2 | hsa-miR-1273f     |
| DCP2 | hsa-miR-3713      |
| DCP2 | hsa-miR-328       |
| DCP2 | hsa-miR-6935-3p   |
| DCP2 | hsa-miR-616-3p    |
| DCP2 | hsa-miR-199b-2-5p |
| DCP2 | hsa-miR-6502-5p   |
| DCP2 | hsa-miR-296-3p    |
| DCP2 | hsa-miR-767       |
| DCP2 | hsa-miR-497-3p    |
| DCP2 | hsa-miR-548ah-3p  |
| DCP2 | hsa-miR-6673-3p   |
| DCP2 | hsa-miR-187-5p    |
| DCP2 | hsa-miR-1241      |
| DCP2 | hsa-miR-2311      |
| DCP2 | hsa-miR-6994-5p   |
| DCP2 | hsa-miR-135a-5p   |
| DCP2 | hsa-miR-301b-3p   |
| DCP2 | hsa-miR-891b      |
| DCP2 | hsa-miR-3087-3p   |
| DCP2 | hsa-miR-539-5p    |
| DCP2 | hsa-miR-6851-5p   |
| DCP2 | hsa-miR-4649-3p   |
| DCP2 | hsa-miR-2052      |
| DCP2 | hsa-miR-96-3p     |
| DCP2 | hsa-miR-6715-3p   |
| DCP2 | hsa-miR-1193      |
| DCP2 | hsa-miR-181d-3p   |
| DCP2 | hsa-miR-506-5p    |
| DCP2 | hsa-miR-743a-3p   |

|      |                  |
|------|------------------|
| DCP2 | hsa-miR-1236-5p  |
| DCP2 | hsa-miR-667-5p   |
| DCP2 | hsa-miR-7264-3p  |
| DCP2 | hsa-miR-196-5p   |
| DCP2 | hsa-miR-7331-5p  |
| DCP2 | hsa-miR-7169-5p  |
| DCP2 | hsa-miR-6780a-5p |
| DCP2 | hsa-miR-3958     |
| DCP2 | hsa-miR-6939-3p  |
| DCP2 | hsa-miR-2116-5p  |
| DCP2 | hsa-miR-7367-3p  |
| DCP2 | hsa-miR-1254     |
| DCP2 | hsa-miR-5622-5p  |
| DCP2 | hsa-miR-449-3p   |
| DCP2 | hsa-miR-4659a-5p |
| DCP2 | hsa-miR-684      |
| DCP2 | hsa-miR-7067-5p  |
| DCP2 | hsa-miR-511-3p   |
| DCP2 | hsa-miR-8853     |
| DCP2 | hsa-miR-34c-5p   |
| DCP2 | hsa-miR-3431     |
| DCP2 | hsa-miR-3561-3p  |
| DCP2 | hsa-miR-669k-5p  |
| DCP2 | hsa-miR-2467-3p  |
| DCP2 | hsa-miR-7365-3p  |
| DCP2 | hsa-miR-4259     |
| DCP2 | hsa-miR-6760-3p  |
| DCP2 | hsa-miR-329-5p   |
| DCP2 | hsa-miR-6516-5p  |
| DCP2 | hsa-miR-7298-5p  |
| DCP2 | hsa-miR-6910-5p  |
| DCP2 | hsa-miR-320-3p   |
| DCP2 | hsa-miR-202-3p   |
| DCP2 | hsa-miR-4509     |
| DCP2 | hsa-miR-6864-3p  |
| DCP2 | hsa-miR-19b-5p   |
| DCP2 | hsa-miR-548ao-5p |
| DCP2 | hsa-miR-3969     |
| DCP2 | hsa-miR-4743-3p  |
| DCP2 | hsa-miR-6418-5p  |
| DCP2 | hsa-miR-7187-3p  |
| DCP2 | hsa-miR-3077-3p  |
| DCP2 | hsa-miR-223-3p   |
| DCP2 | hsa-miR-134-5p   |
| DCP2 | hsa-miR-3543     |
| DCP2 | hsa-miR-7652-5p  |

|      |                  |
|------|------------------|
| DCP2 | hsa-miR-3058-5p  |
| DCP2 | hsa-miR-372      |
| DCP2 | hsa-miR-551-5p   |
| DCP2 | hsa-miR-3187-5p  |
| DCP2 | hsa-miR-454-5p   |
| DCP2 | hsa-miR-6837-5p  |
| DCP2 | hsa-miR-5089-5p  |
| DCP2 | hsa-miR-3157-3p  |
| DCP2 | hsa-miR-7211-3p  |
| DCP2 | hsa-miR-29a-3p   |
| DCP2 | hsa-miR-221-5p   |
| DCP2 | hsa-miR-6715b-3p |
| DCP2 | hsa-miR-7002-5p  |
| DCP2 | hsa-miR-193-5p   |
| DCP2 | hsa-miR-3133     |
| DCP2 | hsa-miR-1668     |
| DCP2 | hsa-miR-6501-5p  |
| DCP2 | hsa-miR-449b-3p  |
| DCP2 | hsa-miR-4749-3p  |
| DCP2 | hsa-miR-3558-3p  |
| DCP2 | hsa-miR-20       |
| DCP2 | hsa-miR-889      |
| DCP2 | hsa-miR-4753-3p  |
| DCP2 | hsa-miR-6828-3p  |
| DCP2 | hsa-miR-655-3p   |
| DCP2 | hsa-miR-219-3p   |
| DCP2 | hsa-miR-6794-3p  |
| DCP2 | hsa-miR-7705     |
| DCP2 | hsa-miR-3667-3p  |
| DCP2 | hsa-miR-2396     |
| DCP2 | hsa-miR-6965-3p  |
| DCP2 | hsa-miR-2324     |
| DCP2 | hsa-miR-6338     |
| DCP2 | hsa-miR-7386j-3p |
| DCP2 | hsa-miR-6974-5p  |
| DCP2 | hsa-miR-7385f-3p |
| DCP2 | hsa-miR-7240-5p  |
| DCP2 | hsa-miR-708-3p   |
| DCP2 | hsa-miR-7035-3p  |
| DCP2 | hsa-miR-342-3p   |
| DCP2 | hsa-miR-129-3p   |
| DCP2 | hsa-miR-363-3p   |
| DCP2 | hsa-miR-98-5p    |
| DCP2 | hsa-miR-548ad-5p |
| DCP2 | hsa-miR-7157-3p  |
| DCP2 | hsa-miR-7198-5p  |

|      |                   |
|------|-------------------|
| DCP2 | hsa-miR-7859      |
| DCP2 | hsa-miR-1943-3p   |
| DCP2 | hsa-miR-938       |
| DCP2 | hsa-miR-6854-5p   |
| DCP2 | hsa-miR-5116      |
| DCP2 | hsa-miR-1231-5p   |
| DCP2 | hsa-miR-3609      |
| DCP2 | hsa-miR-448-5p    |
| DCP2 | hsa-miR-3169      |
| DCP2 | hsa-miR-129-2-3p  |
| DCP2 | hsa-miR-585-5p    |
| DCP2 | hsa-miR-6830-3p   |
| DCP2 | hsa-miR-4713-5p   |
| DCP2 | hsa-miR-454-3p    |
| DCP2 | hsa-miR-6411      |
| DCP2 | hsa-miR-7193-5p   |
| DCP2 | hsa-miR-6867-5p   |
| DCP2 | hsa-let-7-3p      |
| DCP2 | hsa-miR-450a-2-3p |
| DCP2 | hsa-miR-548ar-5p  |
| DCP2 | hsa-miR-885       |
| DCP2 | hsa-miR-6739-3p   |
| DCP2 | hsa-miR-4520-3p   |
| DCP2 | hsa-miR-8880      |
| DCP2 | hsa-miR-4532      |
| DCP2 | hsa-miR-7262-3p   |
| DCP2 | hsa-miR-6900-3p   |
| DCP2 | hsa-miR-7025-3p   |
| DCP2 | hsa-miR-664       |
| DCP2 | hsa-miR-7110-5p   |
| DCP2 | hsa-miR-741-5p    |
| DCP2 | hsa-miR-218-5p    |
| DCP2 | hsa-miR-6942-5p   |
| DCP2 | hsa-miR-7192-5p   |
| DCP2 | hsa-miR-6885-3p   |
| DCP2 | hsa-miR-3179      |
| DCP2 | hsa-miR-429-3p    |
| DCP2 | hsa-miR-5696      |
| DCP2 | hsa-miR-668       |
| DCP2 | hsa-miR-2462      |
| DCP2 | hsa-miR-6758-5p   |
| DCP2 | hsa-miR-548d-5p   |
| DCP2 | hsa-miR-5683      |
| DCP2 | hsa-miR-3663-3p   |
| DCP2 | hsa-miR-199       |
| DCP2 | hsa-miR-5002-5p   |

|      |                  |
|------|------------------|
| DCP2 | hsa-miR-1266     |
| DCP2 | hsa-miR-802-5p   |
| DCP2 | hsa-miR-466q     |
| DCP2 | hsa-miR-6749-3p  |
| DCP2 | hsa-miR-939-3p   |
| DCP2 | hsa-miR-8908-5p  |
| DCP2 | hsa-miR-4496     |
| DCP2 | hsa-miR-7294-5p  |
| DCP2 | hsa-miR-322-5p   |
| DCP2 | hsa-miR-6961-3p  |
| DCP2 | hsa-miR-671-3p   |
| DCP2 | hsa-miR-7270-5p  |
| DCP2 | hsa-miR-6754-3p  |
| DCP2 | hsa-miR-4731-3p  |
| DCP2 | hsa-miR-4307     |
| DCP2 | hsa-miR-424-3p   |
| DCP2 | hsa-miR-2891     |
| DCP2 | hsa-miR-6969-5p  |
| DCP2 | hsa-miR-6945-5p  |
| DCP2 | hsa-miR-486-5p   |
| DCP2 | hsa-miR-1271-5p  |
| DCP2 | hsa-miR-6752-5p  |
| DCP2 | hsa-miR-301-5p   |
| DCP2 | hsa-miR-8850     |
| DCP2 | hsa-miR-7652-3p  |
| DCP2 | hsa-miR-384      |
| DCP2 | hsa-miR-6765-3p  |
| DCP2 | hsa-miR-6378     |
| DCP2 | hsa-miR-8485     |
| DCP2 | hsa-miR-7309-3p  |
| DCP2 | hsa-miR-548u     |
| DCP2 | hsa-miR-501-5p   |
| DCP2 | hsa-miR-6134     |
| DCP2 | hsa-miR-3650     |
| DCP2 | hsa-miR-4445-5p  |
| DCP2 | hsa-miR-592      |
| DCP2 | hsa-miR-6997-5p  |
| DCP2 | hsa-miR-7065-3p  |
| DCP2 | hsa-miR-361-3p   |
| DCP2 | hsa-miR-2357     |
| DCP2 | hsa-miR-320a     |
| DCP2 | hsa-miR-7204-5p  |
| DCP2 | hsa-miR-7398h-3p |
| DCP2 | hsa-miR-4715-5p  |
| DCP2 | hsa-miR-6322     |
| DCP2 | hsa-let-7b-3p    |

|      |                  |
|------|------------------|
| DCP2 | hsa-miR-6928-3p  |
| DCP2 | hsa-miR-7371d-5p |
| DCP2 | hsa-miR-146b-3p  |
| DCP2 | hsa-miR-3125     |
| DCP2 | hsa-miR-875-3p   |
| DCP2 | hsa-miR-375-3p   |
| DCP2 | hsa-miR-7673-3p  |
| DCP2 | hsa-miR-6727-3p  |
| DCP2 | hsa-miR-7276-5p  |
| DCP2 | hsa-miR-8840     |
| DCP2 | hsa-miR-7037-3p  |
| DCP2 | hsa-miR-8106     |
| DCP2 | hsa-miR-618      |
| DCP2 | hsa-miR-200c-3p  |
| DCP2 | hsa-miR-580-5p   |
| DCP2 | hsa-miR-4662b    |
| DCP2 | hsa-miR-3068-3p  |
| DCP2 | hsa-miR-7663-3p  |
| DCP2 | hsa-miR-1702     |
| DCP2 | hsa-miR-4778-5p  |
| DCP2 | hsa-miR-6514-3p  |
| DCP2 | hsa-miR-5197-3p  |
| DCP2 | hsa-miR-378-3p   |
| DCP2 | hsa-miR-3591-3p  |
| DCP2 | hsa-miR-3112-5p  |
| DCP2 | hsa-miR-192-5p   |
| DCP2 | hsa-miR-6912-3p  |
| DCP2 | hsa-miR-2377     |
| DCP2 | hsa-miR-7322-3p  |
| DCP2 | hsa-miR-616-5p   |
| DCP2 | hsa-miR-2469     |
| DCP2 | hsa-miR-6829-3p  |
| DCP2 | hsa-miR-151a-5p  |
| DCP2 | hsa-miR-3190-3p  |
| DCP2 | hsa-miR-7252-3p  |
| DCP2 | hsa-miR-3057-3p  |
| DCP2 | hsa-miR-8868     |
| DCP2 | hsa-miR-3649     |
| DCP2 | hsa-miR-6914-5p  |
| DCP2 | hsa-miR-7398q-3p |
| DCP2 | hsa-miR-7063-5p  |
| DCP2 | hsa-miR-155-5p   |
| DCP2 | hsa-miR-376a-5p  |
| DCP2 | hsa-miR-107-3p   |
| DCP2 | hsa-miR-467g     |
| DCP2 | hsa-miR-7676-5p  |

|      |                  |
|------|------------------|
| DCP2 | hsa-miR-370-5p   |
| DCP2 | hsa-let-7j-3p    |
| DCP2 | hsa-miR-302c-3p  |
| DCP2 | hsa-miR-6372     |
| DCP2 | hsa-miR-31-5p    |
| DCP2 | hsa-miR-2351     |
| DCP2 | hsa-miR-99-3p    |
| DCP2 | hsa-miR-16-1-3p  |
| DCP2 | hsa-miR-1297     |
| DCP2 | hsa-miR-376e     |
| DCP2 | hsa-miR-3556a    |
| DCP2 | hsa-miR-201-3p   |
| DCP2 | hsa-miR-6398     |
| DCP2 | hsa-miR-7363-3p  |
| DCP2 | hsa-miR-7-5p     |
| DCP2 | hsa-miR-4682     |
| DCP2 | hsa-miR-4529-3p  |
| DCP2 | hsa-miR-2285l    |
| DCP2 | hsa-miR-340-3p   |
| DCP2 | hsa-miR-8852     |
| DCP2 | hsa-miR-669bf-3p |
| DCP2 | hsa-miR-3090-5p  |
| DCP2 | hsa-miR-5094     |
| DCP2 | hsa-miR-3101-5p  |
| DCP2 | hsa-miR-6984-3p  |
| DCP2 | hsa-miR-6500-3p  |
| DCP2 | hsa-miR-6790-3p  |
| DCP2 | hsa-miR-871-5p   |
| DCP2 | hsa-miR-3121-3p  |
| DCP2 | hsa-miR-8096     |
| DCP2 | hsa-miR-3094-3p  |
| DCP2 | hsa-miR-548w     |
| DCP2 | hsa-miR-2341     |
| DCP2 | hsa-miR-548i-5p  |
| DCP2 | hsa-let-7afk-3p  |
| DCP2 | hsa-miR-412      |
| DCP2 | hsa-miR-3559-5p  |
| DCP2 | hsa-miR-4524a-3p |
| DCP2 | hsa-miR-4728-5p  |
| DCP2 | hsa-miR-1273h-3p |
| DCP2 | hsa-miR-7398o-5p |
| DCP2 | hsa-miR-130b-3p  |
| DCP2 | hsa-miR-6730-3p  |
| DCP2 | hsa-miR-6747-3p  |
| DCP2 | hsa-miR-30b-3p   |
| DCP2 | hsa-miR-7213-5p  |



|      |                  |
|------|------------------|
| DCP2 | hsa-miR-466g     |
| DCP2 | hsa-miR-7449-3p  |
| DCP2 | hsa-miR-2422     |
| DCP2 | hsa-miR-519e-5p  |
| DCP2 | hsa-miR-26-5p    |
| DCP2 | hsa-miR-2284     |
| DCP2 | hsa-miR-6951-5p  |
| DCP2 | hsa-miR-7330-3p  |
| DCP2 | hsa-miR-6510-5p  |
| DCP2 | hsa-miR-3074-5p  |
| DCP2 | hsa-miR-548o-5p  |
| DCP2 | hsa-miR-3192-5p  |
| DCP2 | hsa-miR-499      |
| DCP2 | hsa-miR-6524     |
| DCP2 | hsa-miR-2114-3p  |
| DCP2 | hsa-miR-7090-5p  |
| DCP2 | hsa-miR-3110-3p  |
| DCP2 | hsa-miR-2331-5p  |
| DCP2 | hsa-miR-6802-3p  |
| DCP2 | hsa-miR-1264-5p  |
| DCP2 | hsa-miR-7035-5p  |
| DCP2 | hsa-miR-2466-3p  |
| DCP2 | hsa-miR-7270-3p  |
| DCP2 | hsa-miR-1245-5p  |
| DCP2 | hsa-miR-7022-3p  |
| DCP2 | hsa-miR-29       |
| DCP2 | hsa-miR-7023-3p  |
| DCP2 | hsa-miR-8053     |
| DCP2 | hsa-miR-6997-3p  |
| DCP2 | hsa-miR-6908-3p  |
| DCP2 | hsa-miR-592-3p   |
| DCP2 | hsa-miR-452-5p   |
| DCP2 | hsa-miR-487b-5p  |
| DCP2 | hsa-miR-7110-3p  |
| DCP2 | hsa-miR-7293-5p  |
| DCP2 | hsa-miR-101-3p.2 |
| DCP2 | hsa-miR-335-3p   |
| DCP2 | hsa-miR-4320     |
| DCP2 | hsa-miR-614      |
| DCP2 | hsa-miR-743b-3p  |
| DCP2 | hsa-miR-345-5p   |
| DCP2 | hsa-miR-543-3p   |
| DCP2 | hsa-miR-7371e-3p |
| DCP2 | hsa-miR-7-5p     |
| DCP2 | hsa-miR-7166-3p  |
| DCP2 | hsa-miR-1643b-5p |

|      |                  |
|------|------------------|
| DCP2 | hsa-miR-24-5p    |
| DCP2 | hsa-miR-553      |
| DCP2 | hsa-miR-526      |
| DCP2 | hsa-miR-4263     |
| DCP2 | hsa-miR-7288-3p  |
| DCP2 | hsa-miR-7340-3p  |
| DCP2 | hsa-miR-17-5p    |
| DCP2 | hsa-miR-378c     |
| DCP2 | hsa-miR-7182-3p  |
| DCP2 | hsa-miR-4426     |
| DCP2 | hsa-miR-5124a    |
| DCP2 | hsa-miR-3151-3p  |
| DCP2 | hsa-miR-548ap-5p |
| DCP2 | hsa-miR-466f-3p  |
| DCP2 | hsa-miR-7232-3p  |
| DCP2 | hsa-miR-8885     |
| DCP2 | hsa-miR-7079-3p  |
| DCP2 | hsa-miR-879-5p   |
| DCP2 | hsa-miR-485      |
| DCP2 | hsa-miR-2383     |
| DCP2 | hsa-miR-7398r-3p |
| DCP2 | hsa-miR-20a-3p   |
| DCP2 | hsa-miR-891      |
| DCP2 | hsa-miR-7333-5p  |
| DCP2 | hsa-miR-1182     |
| DCP2 | hsa-miR-4797-5p  |
| DCP2 | hsa-miR-3076-3p  |
| DCP2 | hsa-miR-7386l-5p |
| DCP2 | hsa-miR-539-3p   |
| DCP2 | hsa-miR-4633-5p  |
| DCP2 | hsa-miR-16-5p    |
| DCP2 | hsa-miR-135-5p   |
| DCP2 | hsa-miR-3653-5p  |
| DCP2 | hsa-miR-8862     |
| DCP2 | hsa-miR-3945     |
| DCP2 | hsa-miR-646      |
| DCP2 | hsa-miR-518-5p   |
| DCP2 | hsa-miR-548g-5p  |
| DCP2 | hsa-miR-7655-3p  |
| DCP2 | hsa-miR-2379     |
| DCP2 | hsa-miR-7043-3p  |
| DCP2 | hsa-miR-23b-5p   |
| DCP2 | hsa-miR-520f-5p  |
| DCP2 | hsa-miR-888-5p   |
| DCP2 | hsa-miR-1322     |
| DCP2 | hsa-miR-1229-5p  |

|      |                   |
|------|-------------------|
| DCP2 | hsa-miR-30e       |
| DCP2 | hsa-miR-302d-5p   |
| DCP2 | hsa-miR-3126-5p   |
| DCP2 | hsa-miR-4700-3p   |
| DCP2 | hsa-miR-7397-3p   |
| DCP2 | hsa-miR-6788-5p   |
| DCP2 | hsa-miR-7686-5p   |
| DCP2 | hsa-miR-327       |
| DCP2 | hsa-miR-140-3p    |
| DCP2 | hsa-miR-1955-5p   |
| DCP2 | hsa-miR-2359      |
| DCP2 | hsa-miR-26a-3p    |
| DCP2 | hsa-miR-2284j     |
| DCP2 | hsa-miR-490-3p    |
| DCP2 | hsa-miR-891a-5p   |
| DCP2 | hsa-miR-105b      |
| DCP2 | hsa-miR-5689      |
| DCP2 | hsa-miR-7012-5p   |
| DCP2 | hsa-miR-466b-4-3p |
| DCP2 | hsa-miR-892a      |
| DCP2 | hsa-miR-7275-5p   |
| DCP2 | hsa-miR-656-3p    |
| DCP2 | hsa-miR-7050-5p   |
| DCP2 | hsa-miR-5687      |
| DCP2 | hsa-miR-8058      |
| DCP2 | hsa-miR-7177-5p   |
| DCP2 | hsa-miR-7314-5p   |
| DCP2 | hsa-miR-4635      |
| DCP2 | hsa-miR-4539      |
| DCP2 | hsa-miR-5583-3p   |
| DCP2 | hsa-miR-6537-3p   |
| DCP2 | hsa-miR-34b-3p    |
| DCP2 | hsa-miR-7386j-5p  |
| DCP2 | hsa-miR-4253      |
| DCP2 | hsa-miR-301a-5p   |
| DCP2 | hsa-miR-205-5p    |
| DCP2 | hsa-miR-657       |
| DCP2 | hsa-miR-463-5p    |
| DCP2 | hsa-miR-124-5p    |
| DCP2 | hsa-miR-7386d-3p  |
| DCP2 | hsa-miR-4441      |
| DCP2 | hsa-miR-6853-3p   |
| DCP2 | hsa-miR-6944-5p   |
| DCP2 | hsa-miR-3588      |
| DCP2 | hsa-miR-4678      |
| DCP2 | hsa-miR-3084-3p   |

|      |                   |
|------|-------------------|
| DCP2 | hsa-miR-299b-5p   |
| DCP2 | hsa-miR-17-3p     |
| DCP2 | hsa-miR-4310      |
| DCP2 | hsa-miR-5624-5p   |
| DCP2 | hsa-miR-5585-5p   |
| DCP2 | hsa-miR-183-5p    |
| DCP2 | hsa-miR-7369-5p   |
| DCP2 | hsa-miR-292a-5p   |
| DCP2 | hsa-miR-1193-5p   |
| DCP2 | hsa-miR-9768-3p   |
| DCP2 | hsa-miR-1950      |
| DCP2 | hsa-miR-182-5p    |
| DCP2 | hsa-miR-1224      |
| DCP2 | hsa-miR-101b-3p.2 |
| DCP2 | hsa-miR-32-5p     |
| DCP2 | hsa-miR-4663      |
| DCP2 | hsa-miR-548t-5p   |
| DCP2 | hsa-miR-7386f-3p  |
| DCP2 | hsa-miR-704       |
| DCP2 | hsa-miR-6845-3p   |
| DCP2 | hsa-miR-518       |
| DCP2 | hsa-miR-6884-3p   |
| DCP2 | hsa-miR-3123      |
| DCP2 | hsa-miR-942-5p    |
| DCP2 | hsa-miR-502-3p    |
| DCP2 | hsa-miR-600       |
| DCP2 | hsa-miR-365a-3p   |
| DCP2 | hsa-miR-6328      |
| DCP2 | hsa-miR-4748      |
| DCP2 | hsa-miR-7254-3p   |
| DCP2 | hsa-miR-6072      |
| DCP2 | hsa-miR-576-3p    |
| DCP2 | hsa-miR-1243-3p   |
| DCP2 | hsa-miR-6779-5p   |
| DCP2 | hsa-miR-6983-5p   |
| DCP2 | hsa-miR-7388c-3p  |
| DCP2 | hsa-miR-873-3p    |
| DCP2 | hsa-miR-6919-3p   |
| DCP2 | hsa-miR-759       |
| DCP2 | hsa-miR-372-3p    |
| DCP2 | hsa-miR-6343      |
| DCP2 | hsa-miR-466       |
| DCP2 | hsa-miR-15-5p     |
| DCP2 | hsa-miR-548aj-5p  |
| DCP2 | hsa-miR-637       |
| DCP2 | hsa-miR-5586-5p   |

|      |                  |
|------|------------------|
| DCP2 | hsa-miR-367-3p   |
| DCP2 | hsa-miR-6132     |
| DCP2 | hsa-miR-346      |
| DCP2 | hsa-miR-5011-5p  |
| DCP2 | hsa-miR-2917     |
| DCP2 | hsa-miR-7304-5p  |
| DCP2 | hsa-miR-6507-5p  |
| DCP2 | hsa-miR-3596     |
| DCP2 | hsa-miR-3596d    |
| DCP2 | hsa-miR-6782-3p  |
| DCP2 | hsa-miR-3145-5p  |
| DCP2 | hsa-miR-449a-3p  |
| DCP2 | hsa-miR-221-3p   |
| DCP2 | hsa-miR-593-3p   |
| DCP2 | hsa-miR-1298-5p  |
| DCP2 | hsa-miR-653-3p   |
| DCP2 | hsa-miR-4804-3p  |
| DCP2 | hsa-miR-7857     |
| DCP2 | hsa-miR-7371b-5p |
| DCP2 | hsa-miR-200b-3p  |
| DCP2 | hsa-miR-188-3p   |
| DCP2 | hsa-miR-344-3p   |
| DCP2 | hsa-miR-1306-5p  |
| DCP2 | hsa-miR-6995-3p  |
| DCP2 | hsa-miR-7341-5p  |
| DCP2 | hsa-miR-1205     |
| DCP2 | hsa-miR-181-3p   |
| DCP2 | hsa-miR-483-3p.2 |
| DCP2 | hsa-miR-2423     |
| DCP2 | hsa-miR-33-3p    |
| DCP2 | hsa-miR-6780b-3p |
| DCP2 | hsa-miR-302c-5p  |
| DCP2 | hsa-miR-143-3p   |
| DCP2 | hsa-miR-7259-5p  |
| DCP2 | hsa-miR-7359-3p  |
| DCP2 | hsa-miR-3072-3p  |
| DCP2 | hsa-miR-130c-5p  |
| DCP2 | hsa-miR-4521     |
| DCP2 | hsa-miR-450a     |
| DCP2 | hsa-miR-7398u-3p |
| DCP2 | hsa-miR-8867     |
| DCP2 | hsa-miR-219-5p   |
| DCP2 | hsa-miR-30c-3p   |
| DCP2 | hsa-miR-4650-5p  |
| DCP2 | hsa-miR-329      |
| DCP2 | hsa-miR-4757-5p  |

|      |                  |
|------|------------------|
| DCP2 | hsa-miR-6508-5p  |
| DCP2 | hsa-miR-30c-5p   |
| DCP2 | hsa-miR-7150     |
| DCP2 | hsa-miR-6124     |
| DCP2 | hsa-miR-6980-5p  |
| DCP2 | hsa-miR-142-3p   |
| DCP2 | hsa-miR-4773     |
| DCP2 | hsa-miR-3102-3p  |
| DCP2 | hsa-miR-556-5p   |
| DCP2 | hsa-miR-7057-5p  |
| DCP2 | hsa-miR-6356     |
| DCP2 | hsa-miR-3124-3p  |
| DCP2 | hsa-miR-2353     |
| DCP2 | hsa-miR-686      |
| DCP2 | hsa-miR-7250-5p  |
| DCP2 | hsa-miR-2450c    |
| DCP2 | hsa-miR-471-5p   |
| DCP2 | hsa-miR-194-5p   |
| DCP2 | hsa-miR-301b-5p  |
| DCP2 | hsa-miR-5187-3p  |
| DCP2 | hsa-miR-8097     |
| DCP2 | hsa-miR-295-3p   |
| DCP2 | hsa-miR-29b-5p   |
| DCP2 | hsa-miR-7233-3p  |
| DCP2 | hsa-miR-1827     |
| DCP2 | hsa-miR-216b-3p  |
| DCP2 | hsa-miR-6995-5p  |
| DCP2 | hsa-miR-3934-5p  |
| DCP2 | hsa-miR-7279-3p  |
| DCP2 | hsa-miR-1270     |
| DCP2 | hsa-miR-540-5p   |
| DCP2 | hsa-miR-5587-5p  |
| DCP2 | hsa-miR-4433a-3p |
| DCP2 | hsa-miR-1814     |
| DCP2 | hsa-miR-3165     |
| DCP2 | hsa-miR-500-5p   |
| DCP2 | hsa-miR-139-5p   |
| DCP2 | hsa-miR-7674-5p  |
| DCP2 | hsa-miR-4761-5p  |
| DCP2 | hsa-miR-488-3p   |
| DCPS | hsa-miR-7051-5p  |
| DCPS | hsa-miR-483-3p.2 |
| DCPS | hsa-miR-15-5p    |
| DCPS | hsa-miR-6960-3p  |
| DCPS | hsa-miR-660-3p   |
| DCPS | hsa-miR-302      |

|      |                  |
|------|------------------|
| DCPS | hsa-miR-5627-3p  |
| DCPS | hsa-miR-8810     |
| DCPS | hsa-miR-5710     |
| DCPS | hsa-miR-3663-5p  |
| DCPS | hsa-miR-883-3p   |
| DCPS | hsa-miR-132-3p   |
| DCPS | hsa-miR-4323     |
| DCPS | hsa-miR-6337     |
| DCPS | hsa-miR-4680-5p  |
| DCPS | hsa-miR-7047-3p  |
| DCPS | hsa-miR-7023-5p  |
| DCPS | hsa-miR-4714-5p  |
| DCPS | hsa-miR-3138     |
| DCPS | hsa-miR-147a     |
| DCPS | hsa-miR-6949-3p  |
| DCPS | hsa-miR-4273     |
| DCPS | hsa-miR-7312-5p  |
| DCPS | hsa-miR-6734-3p  |
| DCPS | hsa-miR-5587-3p  |
| DCPS | hsa-miR-7196-5p  |
| DCPS | hsa-miR-876-5p   |
| DCPS | hsa-miR-550a-5p  |
| DCPS | hsa-miR-506-3p   |
| DCPS | hsa-miR-4723-5p  |
| DCPS | hsa-miR-211-3p   |
| DCPS | hsa-miR-4793-3p  |
| DCPS | hsa-miR-4433b-5p |
| DCPS | hsa-miR-7372-3p  |
| DCPS | hsa-miR-5107-5p  |
| DCPS | hsa-miR-5591-5p  |
| DCPS | hsa-miR-4792     |
| DCPS | hsa-miR-7039-3p  |
| DCPS | hsa-miR-3921     |
| DCPS | hsa-miR-365-5p   |
| DCPS | hsa-miR-603      |
| DCPS | hsa-miR-4742-5p  |
| DCPS | hsa-miR-199-5p   |
| DCPS | hsa-miR-4303     |
| DCPS | hsa-miR-6901-3p  |
| DCPS | hsa-miR-5087     |
| DCPS | hsa-miR-467f     |
| DCPS | hsa-miR-7069-5p  |
| DCPS | hsa-miR-631      |
| DCPS | hsa-miR-7027-5p  |
| DCPS | hsa-miR-7647-5p  |
| DCPS | hsa-miR-548      |

|      |                 |
|------|-----------------|
| DCPS | hsa-miR-378b    |
| DCPS | hsa-miR-3664-3p |
| DCPS | hsa-miR-4421    |
| DCPS | hsa-miR-650     |
| DCPS | hsa-miR-3619-5p |
| DCPS | hsa-miR-6340    |
| DCPS | hsa-miR-6831-5p |
| DCPS | hsa-miR-6741-5p |
| DCPS | hsa-miR-344f-5p |
| DCPS | hsa-miR-7201-5p |
| DCPS | hsa-miR-4469    |
| DCPS | hsa-miR-7163-3p |
| DCPS | hsa-miR-7056-3p |
| DCPS | hsa-miR-3915    |
| DCPS | hsa-miR-6804-5p |
| DCPS | hsa-miR-149-5p  |
| DCPS | hsa-miR-6810-3p |
| DCPS | hsa-miR-5625-5p |
| DCPS | hsa-miR-6776-3p |
| DCPS | hsa-miR-7299-3p |
| DCPS | hsa-miR-3619-3p |
| DCPS | hsa-miR-22-5p   |
| DCPS | hsa-miR-216c-3p |
| DCPS | hsa-miR-3688-5p |
| DCPS | hsa-miR-7175-5p |
| DCPS | hsa-miR-641     |
| DCPS | hsa-miR-4430    |
| DCPS | hsa-miR-4519    |
| DCPS | hsa-miR-873-5p  |
| DCPS | hsa-miR-1915-5p |
| DCPS | hsa-miR-4327    |
| DCPS | hsa-miR-183-5p  |
| DCPS | hsa-miR-296-5p  |
| DCPS | hsa-miR-577-3p  |
| DCPS | hsa-miR-590-5p  |
| DCPS | hsa-miR-578     |
| DCPS | hsa-miR-1228-3p |
| DCPS | hsa-miR-489-3p  |
| DCPS | hsa-miR-1958    |
| DCPS | hsa-miR-3660    |
| DCPS | hsa-miR-4274    |
| DCPS | hsa-miR-103-3p  |
| DCPS | hsa-miR-504-3p  |
| DCPS | hsa-miR-3195    |
| DCPS | hsa-miR-7113-3p |
| DCPS | hsa-miR-760     |



|      |                   |
|------|-------------------|
| DCPS | hsa-miR-1911-3p   |
| DCPS | hsa-miR-4488      |
| DCPS | hsa-miR-6834-5p   |
| DCPS | hsa-miR-1260b     |
| DCPS | hsa-miR-219-5p    |
| DCPS | hsa-miR-597-5p    |
| DCPS | hsa-miR-450a-1-3p |
| DCPS | hsa-miR-4447      |
| DCPS | hsa-miR-5001-5p   |
| DCPS | hsa-miR-19        |
| DCPS | hsa-miR-7152-5p   |
| DCPS | hsa-miR-490-5p    |
| DCPS | hsa-miR-1968-5p   |
| DCPS | hsa-miR-3682-5p   |
| DCPS | hsa-miR-206       |
| DCPS | hsa-miR-541-5p    |
| DCPS | hsa-miR-4307      |
| DCPS | hsa-miR-504-5p    |
| DCPS | hsa-miR-297       |
| DCPS | hsa-miR-431-5p    |
| DCPS | hsa-miR-7261-5p   |
| DCPS | hsa-miR-520       |
| DCPS | hsa-miR-6887-3p   |
| DCPS | hsa-miR-575       |
| DCPS | hsa-miR-376c-3p   |
| DCPS | hsa-miR-4435      |
| DCPS | hsa-miR-222-5p    |
| DCPS | hsa-miR-6890-3p   |
| DCPS | hsa-miR-4656      |
| DCPS | hsa-miR-2475      |
| DCPS | hsa-miR-510-3p    |
| DCPS | hsa-miR-29-5p     |
| DCPS | hsa-miR-3092-3p   |
| DCPS | hsa-miR-1343-5p   |
| DCPS | hsa-miR-5620-3p   |
| DCPS | hsa-miR-186-3p    |
| DCPS | hsa-miR-6777-5p   |
| DCPS | hsa-miR-4471      |
| DCPS | hsa-miR-6319      |
| DCPS | hsa-miR-3059-3p   |
| DCPS | hsa-miR-7155-5p   |
| DCPS | hsa-miR-18a-3p    |
| DCPS | hsa-miR-181-5p    |
| DCPS | hsa-miR-7030-5p   |
| DCPS | hsa-miR-1964-5p   |
| DCPS | hsa-miR-7010-5p   |

|      |                    |
|------|--------------------|
| DCPS | hsa-miR-1199-5p    |
| DCPS | hsa-miR-1948-3p    |
| DCPS | hsa-miR-4266       |
| DCPS | hsa-miR-1238-5p    |
| DCPS | hsa-miR-6982-5p    |
| DCPS | hsa-miR-7679-5p    |
| DCPS | hsa-miR-692        |
| DCPS | hsa-miR-8089       |
| DCPS | hsa-miR-3140-3p    |
| DCPS | hsa-miR-3070-2-3p  |
| DCPS | hsa-miR-6902-5p    |
| DCPS | hsa-miR-4755-3p    |
| DCPS | hsa-miR-7092-3p    |
| DCPS | hsa-miR-6387       |
| DCPS | hsa-miR-548s       |
| DCPS | hsa-miR-6891-5p    |
| DCPS | hsa-miR-3113-3p    |
| DCPS | hsa-miR-3470b      |
| DCPS | hsa-miR-6350       |
| DCPS | hsa-miR-1293       |
| DCPS | hsa-miR-548au-3p   |
| DCPS | hsa-miR-6946-5p    |
| DCPS | hsa-miR-6933-3p    |
| DCPS | hsa-miR-342-3p     |
| DCPS | hsa-miR-7168-5p    |
| DCPS | hsa-miR-3199       |
| DCPS | hsa-miR-872-3p     |
| DCPS | hsa-miR-2296       |
| DCPS | hsa-miR-15b-3p     |
| DCPS | hsa-miR-465-3p     |
| DCPS | hsa-miR-7036b-3p   |
| DCPS | hsa-miR-4510       |
| DCPS | hsa-miR-132-3p     |
| DCPS | hsa-miR-3145-3p    |
| DCPS | hsa-miR-7398s-5p   |
| DCPS | hsa-miR-671-5p     |
| DCPS | hsa-miR-1298-5p    |
| DCPS | hsa-miR-548q       |
| DCPS | hsa-miR-3591       |
| DCPS | hsa-miR-3084bc-5p  |
| DCPS | hsa-miR-133a-3p.2  |
| DCPS | hsa-miR-669aflp-5p |
| DCPS | hsa-miR-669m-5p    |
| DCPS | hsa-miR-195-5p     |
| DCPS | hsa-miR-3104-5p    |
| DCPS | hsa-miR-558        |

|      |                   |
|------|-------------------|
| DCPS | hsa-miR-8844      |
| DCPS | hsa-miR-105-5p    |
| DCPS | hsa-miR-8075      |
| DCPS | hsa-miR-7312-3p   |
| DCPS | hsa-miR-132-5p    |
| DCPS | hsa-miR-6941-5p   |
| DCPS | hsa-miR-654-5p    |
| DCPS | hsa-miR-5006-5p   |
| DCPS | hsa-miR-134-3p    |
| DCPS | hsa-miR-1248      |
| DCPS | hsa-miR-330-3p    |
| DCPS | hsa-miR-889-5p    |
| DCPS | hsa-miR-547-5p    |
| DCPS | hsa-miR-9-5p      |
| DCPS | hsa-miR-1200      |
| DCPS | hsa-miR-1953      |
| DCPS | hsa-miR-23        |
| DCPS | hsa-miR-717       |
| DCPS | hsa-miR-6779-3p   |
| DCPS | hsa-miR-6872-3p   |
| DCPS | hsa-miR-4468      |
| DCPS | hsa-miR-2483      |
| DCPS | hsa-miR-1266-5p   |
| DCPS | hsa-miR-1910-3p   |
| DCPS | hsa-miR-2347      |
| DCPS | hsa-miR-3105-5p   |
| DCPS | hsa-miR-6836-5p   |
| DCPS | hsa-miR-8084      |
| DCPS | hsa-miR-7646-5p   |
| DCPS | hsa-miR-7228-3p   |
| DCPS | hsa-miR-500-3p    |
| DCPS | hsa-miR-548u      |
| DCPS | hsa-miR-7256-5p   |
| DCPS | hsa-miR-483-3p.1  |
| DCPS | hsa-miR-148-3p    |
| DCPS | hsa-miR-6501-5p   |
| DCPS | hsa-miR-5046      |
| DCPS | hsa-miR-7666-3p   |
| DCPS | hsa-miR-8083      |
| DCPS | hsa-miR-8063      |
| DCPS | hsa-miR-7847-3p   |
| DCPS | hsa-miR-218a-1-3p |
| DCPS | hsa-miR-532-5p    |
| DCPS | hsa-miR-3925-3p   |
| DCPS | hsa-miR-4652-5p   |
| DCPS | hsa-miR-125       |

|      |                  |
|------|------------------|
| DCPS | hsa-miR-512-5p   |
| DCPS | hsa-miR-1225-3p  |
| DCPS | hsa-miR-1955-5p  |
| DCPS | hsa-miR-7187-5p  |
| DCPS | hsa-miR-6904-5p  |
| DCPS | hsa-miR-3160-3p  |
| DCPS | hsa-miR-7515     |
| DCPS | hsa-miR-1284     |
| DCPS | hsa-miR-6876-5p  |
| DCPS | hsa-miR-501-3p   |
| DCPS | hsa-miR-3071-5p  |
| DCPS | hsa-miR-2291     |
| DCPS | hsa-miR-3128     |
| DCPS | hsa-miR-6841-3p  |
| DCPS | hsa-miR-5615-3p  |
| DCPS | hsa-miR-6759-5p  |
| DCPS | hsa-miR-6828-3p  |
| DCPS | hsa-miR-669b-5p  |
| DCPS | hsa-miR-7042-5p  |
| DCPS | hsa-miR-3613-5p  |
| DCPS | hsa-miR-3083-5p  |
| DCPS | hsa-miR-302-3p   |
| DCPS | hsa-miR-301-3p   |
| DCPS | hsa-miR-604      |
| DCPS | hsa-miR-5579-3p  |
| DCPS | hsa-miR-103      |
| DCPS | hsa-miR-4781-5p  |
| DCPS | hsa-miR-30c-2-3p |
| DCPS | hsa-miR-4325     |
| DCPS | hsa-miR-6746-3p  |
| DCPS | hsa-miR-7269-5p  |
| DCPS | hsa-miR-4741     |
| DCPS | hsa-miR-6834-3p  |
| DCPS | hsa-miR-6748-5p  |
| DCPS | hsa-miR-7262a-5p |
| DCPS | hsa-miR-3097-3p  |
| DCPS | hsa-miR-218-2-3p |
| DCPS | hsa-miR-693-3p   |
| DCPS | hsa-miR-4501     |
| DCPS | hsa-miR-466n-5p  |
| DCPS | hsa-miR-8103     |
| DCPS | hsa-miR-3667-5p  |
| DCPS | hsa-miR-99-3p    |
| DCPS | hsa-miR-129-5p   |
| DCPS | hsa-miR-6737-3p  |
| DCPS | hsa-miR-22-3p    |

|      |                    |
|------|--------------------|
| DCPS | hsa-miR-1273h-5p   |
| DCPS | hsa-miR-5684       |
| DCPS | hsa-miR-4283       |
| DCPS | hsa-miR-6074       |
| DCPS | hsa-miR-3907       |
| DCPS | hsa-miR-4533       |
| DCPS | hsa-miR-3972       |
| DCPS | hsa-miR-455-3p.1   |
| DCPS | hsa-miR-7354-3p    |
| DCPS | hsa-miR-8899       |
| DCPS | hsa-miR-1545b-3-3p |
| DCPS | hsa-miR-6998-5p    |
| DCPS | hsa-miR-6762-3p    |
| DCPS | hsa-miR-3193       |
| DCPS | hsa-miR-18-3p      |
| DCPS | hsa-miR-216b       |
| DCPS | hsa-miR-6905-5p    |
| DCPS | hsa-miR-6867-5p    |
| DCPS | hsa-miR-10-5p      |
| DCPS | hsa-miR-7660-5p    |
| DCPS | hsa-miR-205-5p     |
| DCPS | hsa-miR-6815-3p    |
| DCPS | hsa-miR-1982-5p    |
| DCPS | hsa-miR-298-5p     |
| DCPS | hsa-miR-4496       |
| DCPS | hsa-miR-208-3p     |
| DCPS | hsa-miR-4769-5p    |
| DCPS | hsa-miR-502-5p     |
| DCPS | hsa-miR-1468       |
| DCPS | hsa-miR-1295b-3p   |
| DCPS | hsa-miR-6511a-5p   |
| DCPS | hsa-miR-92-3p      |
| DCPS | hsa-miR-188-5p     |
| DCPS | hsa-miR-6896-3p    |
| DCPS | hsa-miR-4269       |
| DCPS | hsa-miR-32-3p      |
| DCPS | hsa-miR-6816-3p    |
| DCPS | hsa-miR-3927-3p    |
| DCPS | hsa-miR-6885-5p    |
| DCPS | hsa-miR-2117       |
| DCPS | hsa-miR-3149       |
| DCPS | hsa-miR-6953-5p    |
| DCPS | hsa-miR-1966-3p    |
| DCPS | hsa-miR-1841       |
| DCPS | hsa-miR-423-5p     |
| DCPS | hsa-miR-6822-3p    |

|      |                 |
|------|-----------------|
| DCPS | hsa-miR-518-3p  |
| DCPS | hsa-miR-7976    |
| DCPS | hsa-miR-1233-3p |
| DCPS | hsa-miR-4763-3p |
| DCPS | hsa-miR-532-3p  |
| DCPS | hsa-miR-7194-5p |
| DCPS | hsa-miR-650abc  |
| DCPS | hsa-miR-196     |
| DCPS | hsa-miR-4688    |
| DCPS | hsa-miR-743-5p  |
| DCPS | hsa-miR-6922-5p |
| DCPS | hsa-miR-4451    |
| DCPS | hsa-miR-449a    |
| DCPS | hsa-miR-3664-5p |
| DCPS | hsa-miR-148-5p  |
| DCPS | hsa-miR-920     |
| DCPS | hsa-miR-347     |
| DCPS | hsa-miR-369-3p  |
| DCPS | hsa-miR-4518    |
| DCPS | hsa-miR-7026-3p |
| DCPS | hsa-miR-3559-5p |
| DCPS | hsa-miR-4756-3p |
| DCPS | hsa-miR-1296-3p |
| DCPS | hsa-miR-6325    |
| DCPS | hsa-miR-328-5p  |
| DCPS | hsa-miR-434-3p  |
| DCPS | hsa-miR-18      |
| DCPS | hsa-miR-649     |
| DCPS | hsa-miR-3926    |
| DCPS | hsa-miR-7215-5p |
| DCPS | hsa-miR-4324    |
| DCPS | hsa-miR-574-5p  |
| DCPS | hsa-miR-1307-3p |
| DCPS | hsa-miR-4715-5p |
| DCPS | hsa-miR-107-5p  |
| DCPS | hsa-miR-6768-5p |
| DCPS | hsa-miR-3589    |
| DCPS | hsa-miR-669c-3p |
| DCPS | hsa-miR-6770-5p |
| DCPS | hsa-miR-4284    |
| DCPS | hsa-miR-183-3p  |
| DCPS | hsa-miR-3689-3p |
| DCPS | hsa-miR-33b-3p  |
| DCPS | hsa-miR-4693-5p |
| DCPS | hsa-miR-1587    |
| DCPS | hsa-miR-609     |

|      |                 |
|------|-----------------|
| DCPS | hsa-miR-339-5p  |
| DCPS | hsa-miR-7159-3p |
| DCPS | hsa-miR-449c-3p |
| DCPS | hsa-miR-3098-3p |
| DCPS | hsa-miR-8889    |
| DCPS | hsa-miR-653-3p  |
| DCPS | hsa-miR-1914-5p |
| DCPS | hsa-miR-6999-3p |
| DCPS | hsa-miR-8898    |
| DCPS | hsa-miR-6848-5p |
| DCPS | hsa-miR-8882    |
| DCPS | hsa-miR-3594-5p |
| DCPS | hsa-miR-518-5p  |
| DCPS | hsa-miR-1281    |
| DCPS | hsa-miR-561-3p  |
| DCPS | hsa-miR-675-3p  |
| DCPS | hsa-miR-6797-5p |
| DCPS | hsa-miR-320e    |
| DCPS | hsa-miR-4707-5p |
| DCPS | hsa-miR-7200-5p |
| DCPS | hsa-miR-519d-5p |
| DCPS | hsa-miR-1237-3p |
| DCPS | hsa-miR-659-3p  |
| DCPS | hsa-miR-765     |
| DCPS | hsa-miR-3943    |
| DCPS | hsa-miR-551     |
| DCPS | hsa-miR-5618-5p |
| DCPS | hsa-miR-190a-3p |
| DCPS | hsa-miR-1250-3p |
| DCPS | hsa-miR-769-5p  |
| DCPS | hsa-miR-7019-5p |
| DCPS | hsa-miR-381-3p  |
| DCPS | hsa-miR-7680-5p |
| DCPS | hsa-miR-205-3p  |
| DCPS | hsa-miR-7005-3p |
| DCPS | hsa-miR-892-5p  |
| DCPS | hsa-miR-34      |
| DCPS | hsa-miR-34c-5p  |
| DCPS | hsa-miR-3200-5p |
| DCPS | hsa-miR-516b-3p |
| DCPS | hsa-miR-6975-5p |
| DCPS | hsa-miR-6893-5p |
| DCPS | hsa-miR-186-5p  |
| DCPS | hsa-miR-1305    |
| DCPS | hsa-miR-4725-3p |
| DCPS | hsa-miR-7034-3p |

|      |                  |
|------|------------------|
| DCPS | hsa-miR-3622b-5p |
| DCPS | hsa-miR-380      |
| DCPS | hsa-miR-1178-3p  |
| DCPS | hsa-miR-4667-5p  |
| DCPS | hsa-miR-4313     |
| DCPS | hsa-miR-6401     |
| DCPS | hsa-miR-6320     |
| DCPS | hsa-miR-1262     |
| DCPS | hsa-miR-8076     |
| DCPS | hsa-miR-504-5p.1 |
| DCPS | hsa-miR-6799-5p  |
| DCPS | hsa-miR-3158-5p  |
| DCPS | hsa-miR-1224-5p  |
| DCPS | hsa-miR-375      |
| DCPS | hsa-miR-887-5p   |
| DCPS | hsa-miR-6865-3p  |
| DCPS | hsa-miR-452-5p   |
| DCPS | hsa-miR-7076-5p  |
| DCPS | hsa-miR-4765     |
| DCPS | hsa-miR-141-3p   |
| DCPS | hsa-miR-633      |
| DCPS | hsa-miR-593-3p   |
| DCPS | hsa-miR-6825-5p  |
| DCPS | hsa-miR-1229-3p  |
| DCPS | hsa-miR-5089-5p  |
| DCPS | hsa-miR-6505-5p  |
| DCPS | hsa-miR-6803-5p  |
| DCPS | hsa-miR-6993-5p  |
| DCPS | hsa-miR-466i-3p  |
| DCPS | hsa-miR-6956-5p  |
| DCPS | hsa-miR-4766-3p  |
| DCPS | hsa-miR-1298-3p  |
| DCPS | hsa-miR-3087-5p  |
| DCPS | hsa-miR-185-3p   |
| DCPS | hsa-miR-5088-3p  |
| DCPS | hsa-miR-6824-5p  |
| DCPS | hsa-miR-561-3p   |
| DCPS | hsa-miR-4799-3p  |
| DCPS | hsa-miR-3661     |
| DCPS | hsa-miR-7207-3p  |
| DCPS | hsa-miR-3078-5p  |
| DCPS | hsa-miR-4742     |
| DCPS | hsa-miR-27-3p    |
| DCPS | hsa-let-7-5p     |
| DCPS | hsa-miR-298-3p   |
| DCPS | hsa-miR-125-5p   |



|      |                  |
|------|------------------|
| DCPS | hsa-miR-7088-5p  |
| DCPS | hsa-miR-769-3p   |
| DCPS | hsa-miR-5132-5p  |
| DCPS | hsa-miR-345-5p   |
| DCPS | hsa-miR-1943-5p  |
| DCPS | hsa-miR-7032-3p  |
| DCPS | hsa-miR-197-3p   |
| DCPS | hsa-miR-495-3p   |
| DCPS | hsa-miR-3680-3p  |
| DCPS | hsa-miR-1434-3p  |
| DCPS | hsa-miR-1904     |
| DCPS | hsa-miR-7092-5p  |
| DCPS | hsa-miR-3533     |
| DCPS | hsa-miR-6830-3p  |
| DCPS | hsa-miR-4291     |
| DCPS | hsa-miR-7169-5p  |
| DCPS | hsa-miR-6877-3p  |
| DCPS | hsa-miR-1956-3p  |
| DCPS | hsa-miR-491-5p   |
| DCPS | hsa-miR-499a-3p  |
| DCPS | hsa-miR-526b-5p  |
| DCPS | hsa-miR-664      |
| DCPS | hsa-miR-762      |
| DCPS | hsa-miR-6355     |
| DCPS | hsa-miR-8082     |
| DCPS | hsa-miR-3072-5p  |
| DCPS | hsa-miR-561-5p   |
| DCPS | hsa-miR-433-3p   |
| DCPS | hsa-miR-7033-5p  |
| DCPS | hsa-miR-577      |
| DCPS | hsa-miR-3167-3p  |
| DCPS | hsa-miR-6948-3p  |
| DCPS | hsa-miR-1969     |
| DCPS | hsa-miR-6918-5p  |
| DCPS | hsa-miR-219b-3p  |
| DCPS | hsa-miR-549-3p   |
| DCPS | hsa-miR-3144-5p  |
| DCPS | hsa-miR-7042-3p  |
| DCPS | hsa-miR-6889-5p  |
| DCPS | hsa-miR-6314     |
| DCPS | hsa-miR-7220-5p  |
| DCPS | hsa-miR-583      |
| DCPS | hsa-miR-5125     |
| DCPS | hsa-miR-466mo-3p |
| DCPS | hsa-miR-367-3p   |
| DCPS | hsa-miR-19b-5p   |

|      |                   |
|------|-------------------|
| DCPS | hsa-miR-1238-3p   |
| DCPS | hsa-miR-7019-3p   |
| DCPS | hsa-miR-1322      |
| DCPS | hsa-miR-7094-3p   |
| DCPS | hsa-miR-374-5p    |
| DCPS | hsa-miR-4680-3p   |
| DCPS | hsa-miR-1202      |
| DCPS | hsa-miR-208-5p    |
| DCPS | hsa-miR-5196-5p   |
| DCPS | hsa-miR-2276-3p   |
| DCPS | hsa-miR-6751-5p   |
| DCPS | hsa-miR-1927      |
| DCPS | hsa-miR-3544-3p   |
| DCPS | hsa-miR-7041-3p   |
| DCPS | hsa-miR-3120-5p   |
| DCPS | hsa-miR-30-3p     |
| DCPS | hsa-miR-300-5p    |
| DCPS | hsa-miR-421-3p    |
| DCPS | hsa-miR-203a-3p.1 |
| DCPS | hsa-miR-9-5p      |
| DCPS | hsa-miR-493-3p    |
| DCPS | hsa-miR-3099-5p   |
| DCPS | hsa-miR-670       |
| DCPS | hsa-miR-291-5p    |
| DCPS | hsa-miR-497-5p    |
| DCPS | hsa-miR-1930-3p   |
| DCPS | hsa-miR-7285-5p   |
| DCPS | hsa-miR-6346      |
| DCPS | hsa-miR-16-5p     |
| DCPS | hsa-miR-527       |
| DCPS | hsa-miR-3621      |
| DCPS | hsa-miR-432-5p    |
| DCPS | hsa-miR-3084a-5p  |
| DCPS | hsa-miR-548at-3p  |
| DCPS | hsa-miR-623       |
| DCPS | hsa-miR-577-5p    |
| DCPS | hsa-miR-877-3p    |
| DCPS | hsa-miR-3180-5p   |
| DCPS | hsa-miR-5623-5p   |
| DCPS | hsa-miR-591       |
| DCPS | hsa-miR-8876      |
| DCPS | hsa-miR-7162-3p   |
| DCPS | hsa-miR-3652      |
| DCPS | hsa-miR-4716      |
| DCPS | hsa-miR-875-3p    |
| DCPS | hsa-miR-4489      |

|      |                   |
|------|-------------------|
| DCPS | hsa-miR-7211-5p   |
| DCPS | hsa-miR-3178      |
| DCPS | hsa-miR-34b-3p    |
| DCPS | hsa-miR-548c-3p   |
| DCPS | hsa-miR-1251      |
| DCPS | hsa-miR-6500-5p   |
| DCPS | hsa-miR-7648-3p   |
| DCPS | hsa-miR-30e-3p    |
| DCPS | hsa-miR-764-3p    |
| DCPS | hsa-miR-587       |
| DCPS | hsa-miR-4769-3p   |
| DCPS | hsa-miR-573       |
| DCPS | hsa-miR-2386      |
| DCPS | hsa-miR-6404      |
| DCPS | hsa-miR-20        |
| DCPS | hsa-miR-7179-3p   |
| DCPS | hsa-miR-219-1-3p  |
| DCPS | hsa-miR-3076-5p   |
| DCPS | hsa-miR-96-5p     |
| DCPS | hsa-miR-8827      |
| DCPS | hsa-miR-1231-3p   |
| DCPS | hsa-miR-688       |
| DCPS | hsa-miR-7688-3p   |
| DCPS | hsa-miR-4498      |
| DCPS | hsa-miR-25-3p     |
| DCPS | hsa-miR-6081      |
| DCPS | hsa-miR-1287      |
| DCPS | hsa-miR-362-3p    |
| DCPS | hsa-miR-4691-5p   |
| DCPS | hsa-miR-3173-3p   |
| DCPS | hsa-miR-6775-3p   |
| DCPS | hsa-miR-630       |
| DCPS | hsa-miR-7703      |
| DCPS | hsa-miR-940       |
| DCPS | hsa-miR-103a-2-5p |
| DCPS | hsa-miR-7668-5p   |
| DCPS | hsa-miR-4514      |
| DCPS | hsa-miR-7073-3p   |
| DCPS | hsa-miR-6133      |
| DCPS | hsa-miR-6979-5p   |
| DCPS | hsa-miR-766-3p    |
| DCPS | hsa-miR-1265      |
| DCPS | hsa-miR-3073a-5p  |
| DCPS | hsa-miR-7192-5p   |
| DCPS | hsa-miR-562       |
| DCPS | hsa-miR-1245-5p   |

|      |                  |
|------|------------------|
| DCPS | hsa-miR-6333     |
| DCPS | hsa-miR-340-5p   |
| DCPS | hsa-miR-545-3p   |
| DCPS | hsa-miR-4277     |
| DCPS | hsa-miR-548j-3p  |
| DCPS | hsa-miR-3583-3p  |
| DCPS | hsa-miR-7069-3p  |
| DCPS | hsa-miR-743b-5p  |
| DCPS | hsa-miR-613      |
| DCPS | hsa-miR-496.2    |
| DCPS | hsa-miR-6836-3p  |
| DCPS | hsa-miR-4290     |
| DCPS | hsa-miR-6967-3p  |
| DCPS | hsa-miR-5581-5p  |
| DCPS | hsa-miR-6972-5p  |
| DCPS | hsa-miR-576-5p   |
| DCPS | hsa-miR-8062     |
| DCPS | hsa-miR-5702     |
| DCPS | hsa-miR-544-3p   |
| DCPS | hsa-miR-2284z    |
| DCPS | hsa-miR-508-5p   |
| DCPS | hsa-miR-136-3p   |
| DCPS | hsa-miR-6796-3p  |
| DCPS | hsa-miR-7234-5p  |
| DCPS | hsa-miR-7198-3p  |
| DCPS | hsa-miR-8057     |
| DCPS | hsa-miR-686      |
| DCPS | hsa-miR-3129-3p  |
| DCPS | hsa-miR-526      |
| DCPS | hsa-miR-7195-3p  |
| DCPS | hsa-miR-6891-3p  |
| DCPS | hsa-miR-495-3p   |
| DCPS | hsa-miR-6736-5p  |
| DCPS | hsa-miR-490-3p   |
| DCPS | hsa-miR-615-3p   |
| DCPS | hsa-miR-7160-5p  |
| DCPS | hsa-miR-6080     |
| DCPS | hsa-miR-6808-5p  |
| DCPS | hsa-miR-4654     |
| DCPS | hsa-miR-4781-3p  |
| DCPS | hsa-miR-6130     |
| DCPS | hsa-miR-297bc-3p |
| DCPS | hsa-miR-6947-5p  |
| DCPS | hsa-miR-197-5p   |
| DCPS | hsa-miR-3191-5p  |
| DCPS | hsa-miR-7007-5p  |

|      |                 |
|------|-----------------|
| DCPS | hsa-miR-516a    |
| DCPS | hsa-miR-505-3p  |
| DCPS | hsa-miR-1258-3p |
| DCPS | hsa-miR-21-3p   |
| DCPS | hsa-miR-3164    |
| DCPS | hsa-miR-106-3p  |
| DCPS | hsa-miR-6821-3p |
| DCPS | hsa-miR-3934-3p |
| DCPS | hsa-miR-505-3p  |
| DCPS | hsa-miR-1237-3p |
| DCPS | hsa-miR-5104    |
| DCPS | hsa-miR-629-5p  |
| DCPS | hsa-miR-6391    |
| DCPS | hsa-miR-371a-5p |
| DCPS | hsa-miR-338-5p  |
| DCPS | hsa-miR-32-5p   |
| DCPS | hsa-miR-520g-3p |
| DCPS | hsa-miR-6937-5p |
| DCPS | hsa-miR-4300    |
| DCPS | hsa-miR-6875-3p |
| DCPS | hsa-miR-7065-5p |
| DCPS | hsa-miR-7665-5p |
| DCPS | hsa-miR-6085    |
| DCPS | hsa-miR-26-5p   |
| DCPS | hsa-miR-550a-3p |
| DCPS | hsa-miR-548h-5p |
| DCPS | hsa-miR-6830-5p |
| DCPS | hsa-miR-6762-5p |
| DCPS | hsa-miR-651     |
| DCPS | hsa-miR-193b-3p |
| DCPS | hsa-miR-6818-5p |
| DCPS | hsa-miR-4286    |
| DCPS | hsa-miR-3184-3p |
| DCPS | hsa-miR-3135b   |
| DCPS | hsa-miR-336-5p  |
| DCPS | hsa-miR-5186    |
| DCPS | hsa-miR-6873-5p |
| DCPS | hsa-miR-4698    |
| DCPS | hsa-miR-7243-3p |
| DCPS | hsa-miR-382-5p  |
| DCPS | hsa-miR-3103-3p |
| DCPS | hsa-miR-6925-3p |
| DCPS | hsa-miR-545-3p  |
| DCPS | hsa-miR-4424    |
| DCPS | hsa-miR-484     |
| DCPS | hsa-miR-494     |

|      |                  |
|------|------------------|
| DCPS | hsa-miR-4423-5p  |
| DCPS | hsa-miR-3620-5p  |
| DCPS | hsa-miR-548aq-3p |
| DCPS | hsa-miR-4660     |
| DCPS | hsa-miR-8904a    |
| DCPS | hsa-miR-4651     |
| DCPS | hsa-miR-2406     |
| DCPS | hsa-miR-3591-5p  |
| DCPS | hsa-miR-1825     |
| DCPS | hsa-miR-214-5p   |
| DCPS | hsa-miR-3558-3p  |
| DCPS | hsa-miR-4478     |
| DCPS | hsa-miR-705      |
| DCPS | hsa-miR-299-3p   |
| DCPS | hsa-miR-7032-5p  |
| DCPS | hsa-miR-7208-3p  |
| DCPS | hsa-miR-615-5p   |
| DCPS | hsa-miR-1193-5p  |
| DCPS | hsa-miR-485      |
| DCPS | hsa-miR-7081-3p  |
| DCPS | hsa-miR-6731-5p  |
| DCPS | hsa-miR-4482-3p  |
| DCPS | hsa-miR-944      |
| DCPS | hsa-miR-2425-5p  |
| DCPS | hsa-miR-669k-5p  |
| DCPS | hsa-miR-7035-5p  |
| DCPS | hsa-miR-34bc-3p  |
| DCPS | hsa-miR-2114-5p  |
| DCPS | hsa-miR-6815-5p  |
| DCPS | hsa-miR-3561-3p  |
| DCPS | hsa-miR-3618-5p  |
| DCPS | hsa-miR-7211-3p  |
| DCPS | hsa-miR-519e-5p  |
| DCPS | hsa-miR-4272     |
| DCPS | hsa-miR-2379     |
| DCPS | hsa-miR-4711-3p  |
| DCPS | hsa-miR-524-5p   |
| DCPS | hsa-miR-642      |
| DCPS | hsa-miR-4722-5p  |
| DCPS | hsa-miR-6886-3p  |
| DCPS | hsa-miR-6745     |
| DCPS | hsa-miR-500      |
| DCPS | hsa-miR-7008-3p  |
| DCPS | hsa-miR-6744-3p  |
| DCPS | hsa-miR-2399-5p  |
| DCPS | hsa-miR-891b     |

|      |                  |
|------|------------------|
| DCPS | hsa-miR-597-3p   |
| DCPS | hsa-miR-3192     |
| DCPS | hsa-miR-488-3p   |
| DCPS | hsa-miR-4422     |
| DCPS | hsa-miR-489      |
| DCPS | hsa-miR-6931-5p  |
| DCPS | hsa-miR-6983-5p  |
| DCPS | hsa-miR-470-3p   |
| DCPS | hsa-miR-122-5p   |
| DCPS | hsa-miR-669ao-3p |
| DCPS | hsa-miR-508-3p   |
| DCPS | hsa-miR-6740-3p  |
| DCPS | hsa-miR-4793-5p  |
| DCPS | hsa-miR-511      |
| DCPS | hsa-miR-1721     |
| DCPS | hsa-miR-545-5p   |
| DCPS | hsa-miR-6968-3p  |
| DCPS | hsa-miR-2110     |
| DCPS | hsa-miR-876      |
| DCPS | hsa-miR-5110     |
| DCPS | hsa-miR-6864-5p  |
| DCPS | hsa-miR-3067-5p  |
| DCPS | hsa-miR-103-2-5p |
| DCPS | hsa-miR-323a-5p  |
| DCPS | hsa-miR-4766-5p  |
| DCPS | hsa-miR-568      |
| DCPS | hsa-miR-6837-5p  |
| DCPS | hsa-miR-3689d    |
| DCPS | hsa-miR-296-3p   |
| DCPS | hsa-miR-1910-5p  |
| DCPS | hsa-miR-3672     |
| DCPS | hsa-miR-203-3p   |
| DCPS | hsa-miR-939-5p   |
| DCPS | hsa-miR-6957-5p  |
| DCPS | hsa-miR-15       |
| DCPS | hsa-miR-1237-5p  |
| DCPS | hsa-miR-596      |
| DCPS | hsa-miR-3089-3p  |
| DCPS | hsa-let-7abf-3p  |
| DCPS | hsa-miR-4639-5p  |
| DCPS | hsa-miR-449-5p   |
| DCPS | hsa-miR-4264     |
| DCPS | hsa-miR-6899-3p  |
| DCPS | hsa-miR-370-3p   |
| DCPS | hsa-miR-3686     |
| DCPS | hsa-miR-5590-5p  |

|      |                  |
|------|------------------|
| DCPS | hsa-miR-7169-3p  |
| DCPS | hsa-miR-4786-5p  |
| DCPS | hsa-miR-6990-5p  |
| DCPS | hsa-miR-6928-5p  |
| DCPS | hsa-miR-3552     |
| DCPS | hsa-miR-6943-3p  |
| DCPS | hsa-miR-672-3p   |
| DCPS | hsa-miR-7683-3p  |
| DCPS | hsa-miR-23a-5p   |
| DCPS | hsa-miR-382-3p   |
| DCPS | hsa-miR-4419a    |
| DCPS | hsa-miR-892-3p   |
| DCPS | hsa-miR-6974-3p  |
| DCPS | hsa-miR-5581-3p  |
| DCPS | hsa-miR-7010-3p  |
| DCPS | hsa-miR-665-3p   |
| DCPS | hsa-miR-95-5p    |
| DCPS | hsa-miR-5681b    |
| DCPS | hsa-miR-1262-5p  |
| DCPS | hsa-miR-2284aa   |
| DCPS | hsa-miR-363-5p   |
| DCPS | hsa-miR-548as-3p |
| DCPS | hsa-miR-3078-3p  |
| DCPS | hsa-miR-373-3p   |
| DCPS | hsa-miR-471-3p   |
| DCPS | hsa-miR-7266-3p  |
| DCPS | hsa-miR-182-3p   |
| DCPS | hsa-miR-4316     |
| DCPS | hsa-miR-6358     |
| DCPS | hsa-miR-6889-3p  |
| DCPS | hsa-miR-207      |
| DCPS | hsa-miR-1290     |
| DCPS | hsa-miR-1271-5p  |
| DCPS | hsa-miR-6785-5p  |
| DCPS | hsa-miR-3106-3p  |
| DCPS | hsa-miR-6722-5p  |
| DCPS | hsa-miR-7863     |
| DCPS | hsa-miR-6895-3p  |
| DCPS | hsa-miR-2895     |
| DCPS | hsa-miR-6899-5p  |
| DCPS | hsa-miR-3106-5p  |
| DCPS | hsa-miR-943      |
| DCPS | hsa-miR-3577-5p  |
| DCPS | hsa-miR-7231-5p  |
| DCPS | hsa-miR-3160-5p  |
| DCPS | hsa-miR-1298     |



|      |                  |
|------|------------------|
| DCPS | hsa-miR-6329     |
| DCPS | hsa-miR-6771-3p  |
| DCPS | hsa-miR-378d     |
| DCPS | hsa-miR-134      |
| DCPS | hsa-miR-2278     |
| DCPS | hsa-miR-7012-5p  |
| DCPS | hsa-miR-608      |
| DCPS | hsa-miR-874-3p   |
| DCPS | hsa-miR-6777-3p  |
| DCPS | hsa-miR-216a-5p  |
| DCPS | hsa-miR-544b     |
| DCPS | hsa-miR-6976-3p  |
| DCPS | hsa-miR-7201-3p  |
| DCPS | hsa-miR-593-5p   |
| DCPS | hsa-miR-193      |
| DCPS | hsa-miR-6769b-5p |
| DCPS | hsa-miR-6126     |
| DCPS | hsa-miR-619-3p   |
| DCPS | hsa-miR-551-3p   |
| DCPS | hsa-miR-376a-5p  |
| DCPS | hsa-miR-7164-5p  |
| DCPS | hsa-miR-7250-3p  |
| DCPS | hsa-miR-7016-3p  |
| DCPS | hsa-miR-27-5p    |
| DCPS | hsa-miR-8870     |
| DCPS | hsa-miR-548f-5p  |
| DCPS | hsa-miR-2457     |
| DCPS | hsa-miR-23-3p    |
| DCPS | hsa-miR-606      |
| DCPS | hsa-miR-4802-3p  |
| DCPS | hsa-miR-6529-5p  |
| DCPS | hsa-miR-8813     |
| DCPS | hsa-miR-7158-5p  |
| DCPS | hsa-miR-4493     |
| DCPS | hsa-miR-3096-3p  |
| DCPS | hsa-miR-2054     |
| DCPS | hsa-miR-4722-3p  |
| DCPS | hsa-miR-340-3p   |
| DCPS | hsa-miR-6845-5p  |
| DCPS | hsa-miR-1285-3p  |
| DCPS | hsa-miR-6914-5p  |
| DCPS | hsa-miR-550-5p   |
| DCPS | hsa-miR-599-5p   |
| DCPS | hsa-miR-650d     |
| DCPS | hsa-miR-7-5p     |
| DCPS | hsa-miR-1297     |

|      |                   |
|------|-------------------|
| DCPS | hsa-miR-5114      |
| DCPS | hsa-miR-6855-3p   |
| DCPS | hsa-miR-548ac     |
| DCPS | hsa-miR-6860      |
| DCPS | hsa-miR-627       |
| DCPS | hsa-miR-4697-3p   |
| DCPS | hsa-miR-671-5p    |
| DCPS | hsa-miR-377-5p    |
| DCPS | hsa-miR-191-3p    |
| DCPS | hsa-miR-4425      |
| DCPS | hsa-miR-7206-5p   |
| DCPS | hsa-miR-7088-3p   |
| DCPS | hsa-miR-7691      |
| DCPS | hsa-miR-7852-3p   |
| DCPS | hsa-miR-548x-3p   |
| DCPS | hsa-miR-8839      |
| DCPS | hsa-miR-200ab-5p  |
| DCPS | hsa-miR-19a-5p    |
| DCPS | hsa-miR-548aj-3p  |
| DCPS | hsa-miR-665       |
| DCPS | hsa-miR-4256      |
| DCPS | hsa-miR-519-5p    |
| DCPS | hsa-miR-3136-5p   |
| DCPS | hsa-miR-6814-5p   |
| DCPS | hsa-miR-548cej-3p |
| DCPS | hsa-miR-200bc-3p  |
| DCPS | hsa-miR-411-5p    |
| DCPS | hsa-miR-493-5p    |
| DCPS | hsa-miR-6165      |
| DCPS | hsa-miR-7224-5p   |
| DCPS | hsa-miR-548ap-3p  |
| DCPS | hsa-miR-6134      |
| DCPS | hsa-miR-380-3p    |
| DCPS | hsa-miR-3112-3p   |
| DCPS | hsa-let-7         |
| DCPS | hsa-miR-6962-3p   |
| DCPS | hsa-miR-153       |
| DCPS | hsa-miR-7106-5p   |
| DCPS | hsa-miR-6852-5p   |
| DCPS | hsa-miR-3101-3p   |
| DCPS | hsa-miR-19-5p     |
| DCPS | hsa-miR-2894      |
| DCPS | hsa-miR-383-3p    |
| DCPS | hsa-miR-3977      |
| DCPS | hsa-miR-5588-5p   |
| DCPS | hsa-miR-653       |

|      |                  |
|------|------------------|
| DCPS | hsa-miR-505-3p.1 |
| DCPS | hsa-miR-548a1    |
| DCPS | hsa-miR-3670     |
| DCPS | hsa-miR-2432     |
| DCPS | hsa-miR-337-3p   |
| DCPS | hsa-miR-711      |
| DCPS | hsa-miR-2116-3p  |
| DCPS | hsa-miR-8055     |
| DCPS | hsa-miR-2904     |
| DCPS | hsa-miR-1253     |
| DCPS | hsa-miR-6954-3p  |
| DCPS | hsa-miR-6732-3p  |
| DCPS | hsa-miR-4666a-5p |
| DCPS | hsa-miR-548d-5p  |
| DCPS | hsa-miR-3431     |
| DCPS | hsa-miR-939-5p   |
| DCPS | hsa-miR-494-3p   |
| DCPS | hsa-miR-3190-5p  |
| DCPS | hsa-miR-330-5p   |
| DCPS | hsa-miR-193b-5p  |
| DCPS | hsa-miR-5002-3p  |
| DCPS | hsa-miR-4659a-3p |
| DCPS | hsa-miR-374a-3p  |
| DCPS | hsa-miR-6892-3p  |
| DCPS | hsa-miR-4271     |
| DCPS | hsa-miR-3179     |
| DCPS | hsa-miR-7233-3p  |
| DCPS | hsa-miR-8836     |
| DCPS | hsa-miR-4719     |
| DCPS | hsa-miR-500a-3p  |
| DCPS | hsa-miR-936      |
| DCPS | hsa-miR-3130-3p  |
| DCPS | hsa-miR-133-3p   |
| DCPS | hsa-miR-612      |
| DCPS | hsa-miR-193-3p   |
| DCPS | hsa-miR-7020-5p  |
| DCPS | hsa-miR-4441     |
| DCPS | hsa-miR-3911     |
| DCPS | hsa-miR-138-5p   |
| DCPS | hsa-miR-887      |
| DCPS | hsa-miR-7050-5p  |
| DCPS | hsa-miR-1894-3p  |
| DCPS | hsa-miR-5189-3p  |
| DCPS | hsa-miR-1287-5p  |
| DCPS | hsa-miR-7653-3p  |
| DCPS | hsa-miR-1954     |

|      |                  |
|------|------------------|
| DCPS | hsa-miR-7117-3p  |
| DCPS | hsa-miR-139-3p   |
| DCPS | hsa-miR-1277-5p  |
| DCPS | hsa-miR-3605-3p  |
| DCPS | hsa-miR-373-5p   |
| DCPS | hsa-miR-6734-5p  |
| DCPS | hsa-miR-93-5p    |
| DCPS | hsa-miR-7171-3p  |
| DCPS | hsa-miR-8892     |
| DCPS | hsa-miR-4650     |
| DCPS | hsa-miR-4308     |
| DCPS | hsa-miR-6735-5p  |
| DCPS | hsa-miR-517      |
| DCPS | hsa-miR-7200-3p  |
| DCPS | hsa-miR-7349-3p  |
| DCPS | hsa-miR-145-3p   |
| DCPS | hsa-miR-6925-5p  |
| DCPS | hsa-miR-1188-5p  |
| DCPS | hsa-miR-92a-1-5p |
| DCPS | hsa-miR-4777-3p  |
| DCPS | hsa-miR-3572-5p  |
| DCPS | hsa-miR-6964-5p  |
| DCPS | hsa-miR-7062-5p  |
| DCPS | hsa-miR-6761-5p  |
| DCPS | hsa-miR-371b-5p  |
| DCPS | hsa-miR-153-3p   |
| DCPS | hsa-miR-6846-5p  |
| DCPS | hsa-miR-2437     |
| DCPS | hsa-miR-136-5p   |
| DCPS | hsa-miR-3653-3p  |
| DCPS | hsa-miR-2477     |
| DCPS | hsa-miR-5697-3p  |
| DCPS | hsa-miR-147-5p   |
| DCPS | hsa-miR-4727-5p  |
| DCPS | hsa-miR-4294     |
| DCPS | hsa-miR-6878-5p  |
| DCPS | hsa-miR-1260a    |
| DCPS | hsa-miR-4716-5p  |
| DCPS | hsa-miR-741-3p   |
| DCPS | hsa-miR-8079     |
| DCPS | hsa-miR-3065-5p  |
| DCPS | hsa-miR-679-5p   |
| DCPS | hsa-miR-2380     |
| DCPS | hsa-miR-590-3p   |
| DCPS | hsa-miR-1948-5p  |
| DCPS | hsa-miR-3690     |

|      |                   |
|------|-------------------|
| DCPS | hsa-miR-433       |
| DCPS | hsa-miR-552-5p    |
| DCPS | hsa-miR-656-5p    |
| DCPS | hsa-miR-1838      |
| DCPS | hsa-miR-26        |
| DCPS | hsa-miR-486-5p    |
| DCPS | hsa-miR-1388-3p   |
| DCPS | hsa-miR-4257      |
| DCPS | hsa-miR-135a-1-3p |
| DCPS | hsa-miR-588       |
| DCPS | hsa-miR-5699-3p   |
| DCPS | hsa-miR-133a-3p.1 |
| DCPS | hsa-miR-106       |
| DCPS | hsa-miR-8085      |
| DCPS | hsa-miR-7212-3p   |
| DCPS | hsa-miR-6963-3p   |
| DCPS | hsa-miR-8849      |
| DCPS | hsa-miR-7108-3p   |
| DCPS | hsa-miR-3074-2-3p |
| DCPS | hsa-miR-6740-5p   |
| DCPS | hsa-miR-581       |
| DCPS | hsa-miR-16-5p     |
| DCPS | hsa-miR-4733-5p   |
| DCPS | hsa-miR-7082-3p   |
| DCPS | hsa-miR-4674      |
| DCPS | hsa-miR-2285t     |
| DCPS | hsa-miR-201-3p    |
| DCPS | hsa-miR-3542      |
| DCPS | hsa-miR-92a-2-5p  |
| DCPS | hsa-miR-4676-5p   |
| DCPS | hsa-miR-216a-3p   |
| DCPS | hsa-miR-4694-3p   |
| DCPS | hsa-miR-136-5p    |
| DCPS | hsa-miR-627-5p    |
| DCPS | hsa-miR-3473c     |
| DCPS | hsa-miR-1273f     |
| DCPS | hsa-miR-7231-3p   |
| DCPS | hsa-miR-6848-3p   |
| DCPS | hsa-miR-7689-3p   |
| DCPS | hsa-miR-5135      |
| DCPS | hsa-miR-3573-5p   |
| DCPS | hsa-miR-5787      |
| DCPS | hsa-miR-1246      |
| DCPS | hsa-miR-6910-3p   |
| DCPS | hsa-miR-15c-3p    |
| DCPS | hsa-miR-6774-5p   |

|      |                  |
|------|------------------|
| DCPS | hsa-miR-7351-5p  |
| DCPS | hsa-miR-6348     |
| DCPS | hsa-miR-3065-3p  |
| DCPS | hsa-miR-6371     |
| DCPS | hsa-miR-6323     |
| DCPS | hsa-miR-129-5p   |
| DCPS | hsa-miR-6801-3p  |
| DCPS | hsa-miR-875      |
| DCPS | hsa-miR-6131     |
| DCPS | hsa-miR-7162-5p  |
| DCPS | hsa-miR-4649-3p  |
| DCPS | hsa-miR-664b-5p  |
| DCPS | hsa-miR-7017-5p  |
| DCPS | hsa-miR-133-3p.1 |
| DCPS | hsa-miR-1193     |
| DCPS | hsa-miR-4776-3p  |
| DCPS | hsa-miR-4643     |
| DCPS | hsa-miR-4707-3p  |
| DCPS | hsa-miR-761      |
| DCPS | hsa-miR-2052     |
| DCPS | hsa-miR-670-5p   |
| DCPS | hsa-miR-450b-3p  |
| DCPS | hsa-miR-147a     |
| DCPS | hsa-miR-363-3p   |
| DCPS | hsa-miR-891      |
| DCPS | hsa-miR-320-5p   |
| DCPS | hsa-miR-1814a    |
| DCPS | hsa-miR-8831     |
| DCPS | hsa-miR-300      |
| DCPS | hsa-miR-7052-3p  |
| DCPS | hsa-miR-3085     |
| DCPS | hsa-miR-8885     |
| DCPS | hsa-miR-466f-3p  |
| DCPS | hsa-miR-6089     |
| DCPS | hsa-miR-186-5p   |
| DCPS | hsa-miR-432-3p   |
| DCPS | hsa-miR-770      |
| DCPS | hsa-miR-6351     |
| DCPS | hsa-miR-7286-3p  |
| DCPS | hsa-miR-6911-5p  |
| DCPS | hsa-miR-3099-3p  |
| DCPS | hsa-miR-4288     |
| DCPS | hsa-miR-3557-5p  |
| DCPS | hsa-miR-4486     |
| DCPS | hsa-miR-1205     |
| DCPS | hsa-miR-30c-3p   |

|      |                  |
|------|------------------|
| DCPS | hsa-miR-556-5p   |
| DCPS | hsa-miR-298      |
| DCPS | hsa-miR-31-5p    |
| DCPS | hsa-miR-676-3p   |
| DCPS | hsa-miR-219-3p   |
| DCPS | hsa-miR-1273g-3p |
| DCPS | hsa-miR-4739     |
| DCPS | hsa-miR-709      |
| DCPS | hsa-miR-1266-3p  |
| DCPS | hsa-miR-8080     |
| DCPS | hsa-miR-4692     |
| DCPS | hsa-miR-7090-5p  |
| DCPS | hsa-miR-105b     |
| DCPS | hsa-miR-8908-5p  |
| DCPS | hsa-miR-6331     |
| DCPS | hsa-miR-3132     |
| DCPS | hsa-miR-520gh    |
| DCPS | hsa-miR-20-3p    |
| DCPS | hsa-miR-338-3p   |
| DCPS | hsa-miR-924      |
| DCPS | hsa-miR-8853     |
| DCPS | hsa-miR-6752-5p  |
| DCPS | hsa-miR-6239     |
| DCPS | hsa-miR-28-5p    |
| DCPS | hsa-miR-3187-3p  |
| DCPS | hsa-miR-3175     |
| DCPS | hsa-miR-2461-5p  |
| DCPS | hsa-miR-491-5p   |
| DCPS | hsa-miR-7077-3p  |
| DCPS | hsa-miR-6948-5p  |
| DCPS | hsa-miR-467-3p   |
| DCPS | hsa-miR-522-3p   |
| DCPS | hsa-miR-4690-5p  |
| DCPS | hsa-miR-3913-3p  |
| DCPS | hsa-miR-2308     |
| DCPS | hsa-miR-8108     |
| DCPS | hsa-miR-548g-3p  |
| DCPS | hsa-miR-7199-3p  |
| DCPS | hsa-miR-370      |
| DCPS | hsa-miR-1539     |
| DCPS | hsa-miR-7173-5p  |
| DCPS | hsa-miR-3113-5p  |
| DCPS | hsa-miR-6324     |
| DCPS | hsa-miR-890-5p   |
| DCPS | hsa-miR-3928-3p  |
| DCPS | hsa-miR-216b-5p  |

|      |                   |
|------|-------------------|
| DCPS | hsa-miR-6971-3p   |
| DCPS | hsa-miR-4289      |
| DCPS | hsa-miR-708-5p    |
| DCPS | hsa-miR-465abc-3p |
| DCPS | hsa-miR-6354      |
| DCPS | hsa-miR-4785      |
| DCPS | hsa-miR-548aef    |
| DCPS | hsa-miR-5194      |
| DCPS | hsa-miR-7056-5p   |
| DCPS | hsa-miR-365-3p    |
| DCPS | hsa-miR-486-3p    |
| DCPS | hsa-miR-764       |
| DCPS | hsa-miR-892b      |
| DCPS | hsa-miR-1302      |
| DCPS | hsa-miR-367-3p    |
| DCPS | hsa-miR-6071      |
| DCPS | hsa-miR-1261      |
| DCPS | hsa-miR-622       |
| DCPS | hsa-miR-6895-5p   |
| DCPS | hsa-miR-1252-5p   |
| DCPS | hsa-miR-7218-3p   |
| DCPS | hsa-miR-4708-5p   |
| DCPS | hsa-miR-6817-3p   |
| DCPS | hsa-miR-7846-3p   |
| DCPS | hsa-miR-328-3p    |
| DCPS | hsa-miR-6849-3p   |
| DCPS | hsa-miR-7191-5p   |
| DCPS | hsa-miR-193-5p    |
| DCPS | hsa-miR-3592      |
| DCPS | hsa-miR-3140-3p   |
| DCPS | hsa-miR-7205-3p   |
| DCPS | hsa-miR-1301-5p   |
| DCPS | hsa-miR-514b-5p   |
| DCPS | hsa-miR-6988-3p   |
| DCPS | hsa-miR-4305      |
| DCPS | hsa-miR-141-5p    |
| DCPS | hsa-miR-15a-3p    |
| DCPS | hsa-miR-203-3p.1  |
| DCPS | hsa-miR-3662      |
| DCPS | hsa-miR-3692-3p   |
| DCPS | hsa-miR-8097      |
| DCPS | hsa-miR-4314      |
| DCPS | hsa-miR-103b      |
| DCPS | hsa-miR-4731-5p   |
| DCPS | hsa-miR-5125-5p   |
| DCPS | hsa-miR-7360-5p   |



|      |                  |
|------|------------------|
| DCPS | hsa-miR-635      |
| DCPS | hsa-miR-344i     |
| DCPS | hsa-miR-1843a-5p |
| DCPS | hsa-miR-33-5p    |
| DCPS | hsa-miR-1273e    |
| DCPS | hsa-miR-3927-3p  |
| DCPS | hsa-miR-5690     |
| DCPS | hsa-miR-6775-5p  |
| DCPS | hsa-miR-153-5p   |
| DCPS | hsa-miR-6514-3p  |
| DCPS | hsa-miR-653-5p   |
| DCPS | hsa-miR-5692bc   |
| DCPS | hsa-miR-421-5p   |
| DCPS | hsa-miR-206-5p   |
| DCPS | hsa-miR-3929     |
| DCPS | hsa-miR-370-5p   |
| DCPS | hsa-miR-4750-3p  |
| DCPS | hsa-miR-7174-5p  |
| DCPS | hsa-miR-8832     |
| DCPS | hsa-miR-6819-3p  |
| DCPS | hsa-miR-204-3p   |
| DCPS | hsa-miR-628-3p   |
| DCPS | hsa-miR-4513     |
| DCPS | hsa-miR-3194-3p  |
| DCPS | hsa-miR-7224-3p  |
| DCPS | hsa-miR-2397-5p  |
| DCPS | hsa-miR-677-5p   |
| DCPS | hsa-miR-3173-3p  |
| DCPS | hsa-miR-130-3p   |
| DCPS | hsa-miR-4535     |
| DCPS | hsa-miR-656      |
| DCPS | hsa-miR-7118-5p  |
| DCPS | hsa-miR-6788-5p  |
| DCPS | hsa-miR-7009-5p  |
| DCPS | hsa-miR-1835     |
| DCPS | hsa-miR-5698     |
| DCPS | hsa-miR-680      |
| DCPS | hsa-miR-301b-5p  |
| DCPS | hsa-miR-1256     |
| DCPS | hsa-miR-7227-5p  |
| DCPS | hsa-miR-22-3p    |
| DCPS | hsa-miR-2902     |
| DCPS | hsa-miR-5093     |
| DCPS | hsa-miR-6513-5p  |
| DCPS | hsa-miR-4534     |
| DCPS | hsa-miR-6806-5p  |

|      |                  |
|------|------------------|
| DCPS | hsa-miR-4791     |
| DCPS | hsa-miR-7175-3p  |
| DCPS | hsa-miR-376e     |
| DCPS | hsa-miR-3074-3p  |
| DCPS | hsa-miR-1267     |
| DCPS | hsa-miR-7068-3p  |
| DCPS | hsa-miR-3577-3p  |
| DCPS | hsa-miR-3116     |
| DCPS | hsa-miR-3663-3p  |
| DCPS | hsa-miR-454-5p   |
| DCPS | hsa-miR-2285m    |
| DCPS | hsa-miR-7218-5p  |
| DCPS | hsa-miR-450-5p   |
| DCPS | hsa-miR-8906     |
| DCPS | hsa-miR-767-3p   |
| DCPS | hsa-miR-4775     |
| DCPS | hsa-miR-4708-3p  |
| DCPS | hsa-miR-1245a    |
| DCPS | hsa-miR-1252     |
| DCPS | hsa-miR-8842     |
| DCPS | hsa-miR-4729     |
| DCPS | hsa-miR-3085-3p  |
| DCPS | hsa-miR-5101     |
| DCPS | hsa-miR-5107-3p  |
| DCPS | hsa-miR-140-3p.1 |
| DCPS | hsa-miR-7083-3p  |
| DCPS | hsa-miR-4279     |
| DCPS | hsa-miR-6980-3p  |
| DCPS | hsa-miR-7210-3p  |
| DCPS | hsa-miR-429-5p   |
| DCPS | hsa-miR-6957-3p  |
| DCPS | hsa-miR-513a     |
| DCPS | hsa-miR-1668     |
| DCPS | hsa-miR-3079-3p  |
| DCPS | hsa-miR-378      |
| DCPS | hsa-miR-6360     |
| DCPS | hsa-miR-1191b-3p |
| DCPS | hsa-miR-4745-5p  |
| DCPS | hsa-miR-7314-3p  |
| DCPS | hsa-let-7g-3p    |
| DCPS | hsa-miR-409-5p   |
| DCPS | hsa-miR-4668-5p  |
| DCPS | hsa-miR-210-5p   |
| DCPS | hsa-miR-1915-3p  |
| DCPS | hsa-miR-5623-3p  |
| DCPS | hsa-miR-6829-5p  |

|      |                   |
|------|-------------------|
| DCPS | hsa-miR-3964      |
| DCPS | hsa-miR-4685-5p   |
| DCPS | hsa-miR-6073      |
| DCPS | hsa-miR-3161      |
| DCPS | hsa-miR-1-3p      |
| DCPS | hsa-miR-3475-3p   |
| DCPS | hsa-miR-3120-3p   |
| DCPS | hsa-miR-7094-1-5p |
| DCPS | hsa-miR-7073-5p   |
| DCPS | hsa-miR-7111-5p   |
| DCPS | hsa-miR-6527      |
| DCPS | hsa-miR-7214-3p   |
| DCPS | hsa-miR-548az-3p  |
| DCPS | hsa-miR-6315      |
| DCPS | hsa-miR-6760-3p   |
| DCPS | hsa-miR-7851-3p   |
| DCPS | hsa-miR-7008-5p   |
| DCPS | hsa-miR-544a      |
| DCPS | hsa-miR-3157-5p   |
| DCPS | hsa-miR-548ah-3p  |
| DCPS | hsa-miR-3975      |
| DCPS | hsa-miR-3120-3p   |
| DCPS | hsa-miR-6403      |
| DCPS | hsa-miR-6750-3p   |
| DCPS | hsa-miR-759       |
| DCPS | hsa-miR-6756-5p   |
| DCPS | hsa-miR-124-5p    |
| DCPS | hsa-miR-452-3p    |
| DCPS | hsa-miR-7156-5p   |
| DCPS | hsa-miR-5580-5p   |
| DCPS | hsa-miR-4419b     |
| DCPS | hsa-miR-200c-3p   |
| DCPS | hsa-miR-7025-3p   |
| DCPS | hsa-miR-6870-5p   |
| DCPS | hsa-miR-8797      |
| DCPS | hsa-miR-548ae-3p  |
| DCPS | hsa-miR-6779-5p   |
| DCPS | hsa-miR-7176-5p   |
| DCPS | hsa-miR-2358      |
| DCPS | hsa-miR-7195-5p   |
| DCPS | hsa-miR-6788-3p   |
| DCPS | hsa-miR-876-3p    |
| DCPS | hsa-miR-922       |
| DCPS | hsa-miR-2467-5p   |
| DCPS | hsa-miR-4763-5p   |
| DCPS | hsa-miR-1905      |

|      |                  |
|------|------------------|
| DCPS | hsa-miR-6908-5p  |
| DCPS | hsa-miR-4796-3p  |
| DCPS | hsa-miR-4260     |
| DCPS | hsa-miR-499b-3p  |
| DCPS | hsa-miR-4326     |
| DCPS | hsa-miR-1836     |
| DCPS | hsa-miR-492      |
| DCPS | hsa-miR-6514-5p  |
| DCPS | hsa-miR-4483     |
| DCPS | hsa-miR-29b-2-5p |
| DCPS | hsa-miR-133b-5p  |
| DCPS | hsa-miR-5192     |
| DCPS | hsa-miR-6789-5p  |
| DCPS | hsa-miR-374b-5p  |
| DCPS | hsa-miR-3684     |
| DCPS | hsa-miR-6763-3p  |
| DCPS | hsa-miR-2285x    |
| DCPS | hsa-miR-647      |
| DCPS | hsa-miR-2682-3p  |
| DCPS | hsa-miR-1892     |
| DCPS | hsa-miR-2464-3p  |
| DCPS | hsa-miR-7193-3p  |
| DCPS | hsa-miR-154-5p   |
| DCPS | hsa-miR-2114-5p  |
| DCPS | hsa-miR-1225     |
| DCPS | hsa-miR-6864-3p  |
| DCPS | hsa-miR-657      |
| DCPS | hsa-miR-2401     |
| DCPS | hsa-miR-182-5p   |
| DCPS | hsa-miR-466f-5p  |
| DCPS | hsa-miR-6902-3p  |
| DCPS | hsa-miR-6862-3p  |
| DCPS | hsa-miR-1306-3p  |
| DCPS | hsa-miR-1289     |
| DCPS | hsa-miR-6950-3p  |
| DCPS | hsa-miR-507      |
| DCPS | hsa-miR-6502-5p  |
| DCPS | hsa-miR-766-3p   |
| DCPS | hsa-miR-142      |
| DCPS | hsa-miR-7024-3p  |
| DCPS | hsa-miR-890      |
| DCPS | hsa-miR-7845-5p  |
| DCPS | hsa-miR-7081-5p  |
| DCPS | hsa-miR-548am-3p |
| DCPS | hsa-miR-293-3p   |
| DCPS | hsa-miR-4251     |

|      |                  |
|------|------------------|
| DCPS | hsa-miR-378a-5p  |
| DCPS | hsa-miR-1285-3p  |
| DCPS | hsa-miR-4470     |
| DCPS | hsa-miR-7091-5p  |
| DCPS | hsa-miR-7189-3p  |
| DCPS | hsa-miR-7-3p     |
| DCPS | hsa-miR-3572-3p  |
| DCPS | hsa-miR-6861-3p  |
| DCPS | hsa-miR-8805     |
| DCPS | hsa-miR-3094-5p  |
| DCPS | hsa-miR-7398l-5p |
| DCPS | hsa-miR-8887     |
| DCPS | hsa-miR-3075     |
| DCPS | hsa-miR-199-3p   |
| DCPS | hsa-miR-3974     |
| DCPS | hsa-miR-1226-3p  |
| DCPS | hsa-miR-3150a-3p |
| DCPS | hsa-miR-1247-3p  |
| DCPS | hsa-miR-6764-3p  |
| DCPS | hsa-miR-7657-3p  |
| DCPS | hsa-miR-6824-3p  |
| DCPS | hsa-miR-155-3p   |
| DCPS | hsa-miR-4476     |
| DCPS | hsa-miR-7684-3p  |
| DCPS | hsa-miR-146b-3p  |
| DCPS | hsa-miR-7157-3p  |
| DCPS | hsa-miR-1276     |
| DCPS | hsa-miR-215-5p   |
| DCPS | hsa-miR-6965-3p  |
| DCPS | hsa-miR-632      |
| DCPS | hsa-miR-6976-5p  |
| DCPS | hsa-miR-383      |
| DCPS | hsa-miR-1227-3p  |
| DCPS | hsa-miR-7864     |
| DCPS | hsa-miR-7240-5p  |
| DCPS | hsa-miR-6129     |
| DCPS | hsa-miR-5700     |
| DCPS | hsa-miR-7848-3p  |
| DCPS | hsa-miR-6732-5p  |
| DCPS | hsa-miR-7664-3p  |
| DCPS | hsa-miR-550b-3p  |
| DCPS | hsa-miR-6727-5p  |
| DCPS | hsa-miR-1343-3p  |
| DCPS | hsa-miR-3061-3p  |
| DCPS | hsa-miR-522-3p   |
| DCPS | hsa-miR-743ab-3p |

|      |                  |
|------|------------------|
| DCPS | hsa-miR-1972     |
| DCPS | hsa-miR-5691     |
| DCPS | hsa-miR-7161-5p  |
| DCPS | hsa-miR-34-5p    |
| DCPS | hsa-miR-7254-5p  |
| DCPS | hsa-miR-409-3p   |
| DCPS | hsa-miR-7028-3p  |
| DCPS | hsa-miR-410      |
| DCPS | hsa-miR-8119     |
| DCPS | hsa-miR-7048-3p  |
| DCPS | hsa-miR-4703-3p  |
| DCPS | hsa-miR-7219-5p  |
| DCPS | hsa-miR-8804     |
| DCPS | hsa-miR-548g-5p  |
| DCPS | hsa-miR-7058-5p  |
| DCPS | hsa-miR-548aj-5p |
| DCPS | hsa-miR-3649     |
| DCPS | hsa-miR-187-5p   |
| DCPS | hsa-miR-8092     |
| DCPS | hsa-miR-224-5p   |
| DCPS | hsa-miR-5189-5p  |
| DCPS | hsa-miR-4700-3p  |
| DCPS | hsa-miR-548i-5p  |
| DCPS | hsa-miR-7398r-5p |
| DCPS | hsa-miR-497-3p   |
| DCPS | hsa-miR-6847-5p  |
| DCPS | hsa-miR-8837     |
| DCPS | hsa-miR-667-3p   |
| DCPS | hsa-miR-450b-5p  |
| DCPS | hsa-miR-6932-3p  |
| DCPS | hsa-miR-670-3p   |
| DCPS | hsa-miR-3090-3p  |
| DCPS | hsa-miR-6935-5p  |
| DCPS | hsa-miR-3612     |
| DCPS | hsa-miR-8808     |
| DCPS | hsa-miR-6800-5p  |
| DCPS | hsa-miR-4761-3p  |
| DCPS | hsa-miR-2315     |
| DCPS | hsa-miR-2426     |
| DCPS | hsa-miR-885-3p   |
| DCPS | hsa-miR-6832-5p  |
| DCPS | hsa-miR-4480     |
| DCPS | hsa-miR-4773     |
| DCPS | hsa-miR-6980-5p  |
| DCPS | hsa-miR-6793-5p  |
| DCPS | hsa-miR-6991-3p  |

|      |                 |
|------|-----------------|
| DCPS | hsa-miR-519     |
| DCPS | hsa-miR-6784-3p |
| DCPS | hsa-miR-6825-3p |
| DCPS | hsa-miR-1547-3p |
| DCPS | hsa-miR-540-5p  |
| DCPS | hsa-miR-322-5p  |
| DCPS | hsa-miR-6842-3p |
| DCPS | hsa-miR-8877    |
| DCPS | hsa-miR-3163    |
| DCPS | hsa-miR-7048-5p |
| DCPS | hsa-miR-6728-3p |
| DCPS | hsa-miR-107-3p  |
| DCPS | hsa-miR-5572    |
| DCPS | hsa-miR-619-5p  |
| DCPS | hsa-miR-6317    |
| DCPS | hsa-miR-8052    |
| DCPS | hsa-miR-4736    |
| DCPS | hsa-miR-4673    |
| DCPS | hsa-miR-1250    |
| DCPS | hsa-miR-3668    |
| DCPS | hsa-miR-3202    |
| DCPS | hsa-miR-4704-3p |
| DCPS | hsa-miR-4529-5p |
| DCPS | hsa-miR-344-5p  |
| DCPS | hsa-miR-518a-5p |
| DCPS | hsa-miR-3140-5p |
| DCPS | hsa-miR-8077    |
| DCPS | hsa-miR-7181-5p |
| DCPS | hsa-miR-140-5p  |
| DCPS | hsa-miR-532-5p  |
| DCPS | hsa-miR-7116-5p |
| DCPS | hsa-miR-93-3p   |
| DCPS | hsa-miR-5096    |
| DCPS | hsa-miR-7108-5p |
| DCPS | hsa-miR-185-5p  |
| DCPS | hsa-miR-6883-5p |
| DCPS | hsa-miR-5703    |
| DCPS | hsa-miR-4632-5p |
| DCPS | hsa-miR-2382-5p |
| DCPS | hsa-miR-4633-3p |
| DCPS | hsa-miR-6512-5p |
| DCPS | hsa-miR-3973    |
| DCPS | hsa-miR-517-5p  |
| DCPS | hsa-miR-677-3p  |
| DCPS | hsa-miR-3076-3p |
| DCPS | hsa-miR-6926-3p |

|      |                   |
|------|-------------------|
| DCPS | hsa-miR-2376      |
| DCPS | hsa-miR-661       |
| DCPS | hsa-miR-4433a-5p  |
| DCPS | hsa-miR-6807-5p   |
| DCPS | hsa-miR-1283      |
| DCPS | hsa-miR-673-5p    |
| DCPS | hsa-miR-1952      |
| DCPS | hsa-miR-519e-3p   |
| DCPS | hsa-miR-3940-3p   |
| DCPS | hsa-miR-214-3p    |
| DCPS | hsa-miR-4433b-3p  |
| DCPS | hsa-miR-4516      |
| DCPS | hsa-miR-4492      |
| DCPS | hsa-miR-202-3p    |
| DCPS | hsa-miR-6865-5p   |
| DCPS | hsa-miR-2285s     |
| DCPS | hsa-miR-3617-5p   |
| DCPS | hsa-miR-10        |
| DCPS | hsa-miR-4787-5p   |
| DCPS | hsa-miR-26b-3p    |
| DCPS | hsa-miR-215       |
| DCPS | hsa-miR-674-5p    |
| DCPS | hsa-miR-2447      |
| DCPS | hsa-miR-4743-5p   |
| DCPS | hsa-miR-6918-3p   |
| DCPS | hsa-miR-8873b     |
| DCPS | hsa-miR-6868-3p   |
| DCPS | hsa-miR-3620-3p   |
| DCPS | hsa-miR-2309      |
| DCPS | hsa-miR-6516-5p   |
| DCPS | hsa-miR-6843-3p   |
| DCPS | hsa-miR-6778-3p   |
| DCPS | hsa-miR-496a-3p.1 |
| DCPS | hsa-miR-3122      |
| DCPS | hsa-miR-6857-5p   |
| DCPS | hsa-miR-152-3p    |
| DCPS | hsa-miR-3110-5p   |
| DCPS | hsa-miR-4747-5p   |
| DCPS | hsa-miR-2378      |
| DCPS | hsa-miR-1270      |
| DCPS | hsa-miR-1245a     |
| DCPS | hsa-miR-6920-5p   |
| DCPS | hsa-miR-3096-5p   |
| DCPS | hsa-miR-2486-5p   |
| DCPS | hsa-miR-576-3p    |
| DCPS | hsa-miR-542-3p    |



|      |                  |
|------|------------------|
| DCPS | hsa-miR-7649-3p  |
| DCPS | hsa-miR-2957     |
| DCPS | hsa-miR-885-5p   |
| DCPS | hsa-miR-7173-3p  |
| DCPS | hsa-miR-4725-5p  |
| DCPS | hsa-miR-7113-5p  |
| DCPS | hsa-miR-8093     |
| DCPS | hsa-miR-135b-3p  |
| DCPS | hsa-miR-7655-3p  |
| DCPS | hsa-miR-424-5p   |
| DCPS | hsa-miR-580      |
| DCPS | hsa-miR-6771-5p  |
| DCPS | hsa-miR-6501-3p  |
| DCPS | hsa-miR-1226-3p  |
| DCPS | hsa-miR-3182     |
| DCPS | hsa-miR-7684-5p  |
| DCPS | hsa-miR-185-5p   |
| DCPS | hsa-miR-3664-5p  |
| DCPS | hsa-miR-676-5p   |
| DCPS | hsa-miR-411-5p   |
| DCPS | hsa-miR-4668-3p  |
| DCPS | hsa-miR-668-3p   |
| DCPS | hsa-miR-4797-3p  |
| DCPS | hsa-miR-6528     |
| DCPS | hsa-miR-7049-5p  |
| DCPS | hsa-miR-381-5p   |
| DCPS | hsa-miR-3568     |
| DCPS | hsa-miR-6356     |
| DCPS | hsa-miR-4439     |
| DCPS | hsa-miR-7066-5p  |
| DCPS | hsa-miR-802-3p   |
| DCPS | hsa-miR-194-5p   |
| DCPS | hsa-miR-4318     |
| DCPS | hsa-miR-212-5p   |
| DCPS | hsa-miR-202-3p   |
| DCPS | hsa-miR-2891     |
| DCPS | hsa-miR-4309     |
| DCPS | hsa-miR-7166-3p  |
| DCPS | hsa-miR-361-5p   |
| DCPS | hsa-miR-3136-5p  |
| DCPS | hsa-miR-8893     |
| DCPS | hsa-miR-1304-5p  |
| DCPS | hsa-miR-548bd-3p |
| DCPS | hsa-miR-3124-3p  |
| DCPS | hsa-miR-8059     |
| DCPS | hsa-miR-4646-5p  |

|      |                  |
|------|------------------|
| DCPS | hsa-miR-192-5p   |
| DCPS | hsa-miR-6938-3p  |
| DCPS | hsa-miR-1545b-3p |
| DCPS | hsa-miR-1942     |
| DCPS | hsa-miR-6516-3p  |
| DCPS | hsa-miR-2454-3p  |
| DCPS | hsa-miR-1304-3p  |
| DCPS | hsa-miR-6418-3p  |
| DCPS | hsa-miR-7178-3p  |
| DCPS | hsa-miR-3189-3p  |
| DCPS | hsa-miR-4255     |
| DCPS | hsa-miR-4504     |
| DCPS | hsa-miR-1230     |
| DCPS | hsa-miR-4292     |
| DCPS | hsa-miR-138-2-3p |
| DCPS | hsa-miR-6733-3p  |
| DCPS | hsa-miR-6748-3p  |
| DCPS | hsa-miR-548h-3p  |
| DCPS | hsa-miR-6986-5p  |
| DCPS | hsa-miR-764-5p   |
| DCPS | hsa-miR-411-5p.2 |
| DCPS | hsa-miR-381-3p   |
| DCPS | hsa-miR-6983-3p  |
| DCPS | hsa-miR-499b-3p  |
| DCPS | hsa-miR-1260a    |
| DCPS | hsa-miR-1194     |
| DCPS | hsa-miR-1188-3p  |
| DCPS | hsa-miR-4757-5p  |
| DCPS | hsa-miR-624-3p   |
| DCPS | hsa-miR-6862-5p  |
| DCPS | hsa-miR-204-5p   |
| DCPS | hsa-miR-6365     |
| DCPS | hsa-miR-6835-5p  |
| DCPS | hsa-miR-513a-5p  |
| DCPS | hsa-miR-6511-5p  |
| DCPS | hsa-miR-1226-5p  |
| DCPS | hsa-miR-7075-5p  |
| DCPS | hsa-miR-107      |
| DCPS | hsa-miR-664a-5p  |
| DCPS | hsa-miR-4446-5p  |
| DCPS | hsa-miR-6817-5p  |
| DCPS | hsa-miR-146a-3p  |
| DCPS | hsa-miR-7005-5p  |
| DCPS | hsa-miR-377-3p   |
| DCPS | hsa-miR-5582-5p  |
| DCPS | hsa-miR-6922-3p  |

|      |                   |
|------|-------------------|
| DCPS | hsa-miR-1909-3p   |
| DCPS | hsa-miR-636       |
| DCPS | hsa-miR-142-3p.2  |
| DCPS | hsa-miR-6086      |
| DCPS | hsa-miR-25-3p     |
| DCPS | hsa-miR-766-5p    |
| DCPS | hsa-miR-4749-3p   |
| DCPS | hsa-miR-1262-3p   |
| DCPS | hsa-miR-6758-3p   |
| DCPS | hsa-miR-548z      |
| DCPS | hsa-miR-7002-5p   |
| DCPS | hsa-miR-3201      |
| DCPS | hsa-miR-548aw     |
| DCPS | hsa-miR-92        |
| DCPS | hsa-miR-7154-5p   |
| DCPS | hsa-miR-6128      |
| DCPS | hsa-miR-326       |
| DCPS | hsa-miR-1179      |
| DCPS | hsa-miR-519-3p    |
| DCPS | hsa-miR-6845-3p   |
| DCPS | hsa-miR-106-5p    |
| DCPS | hsa-miR-1251-3p   |
| DCPS | hsa-miR-4485-5p   |
| DCPS | hsa-miR-345-3p    |
| DCPS | hsa-miR-431-5p    |
| DCPS | hsa-miR-466ade-3p |
| DCPS | hsa-miR-569       |
| DCPS | hsa-miR-1178-3p   |
| DCPS | hsa-miR-467g      |
| DCPS | hsa-miR-7177-5p   |
| DCPS | hsa-miR-4539      |
| DCPS | hsa-miR-6856-5p   |
| DCPS | hsa-miR-3671      |
| DCPS | hsa-miR-1234-3p   |
| DCPS | hsa-miR-30b-3p    |
| DCPS | hsa-miR-6940-5p   |
| DCPS | hsa-miR-3070-3p   |
| DCPS | hsa-miR-20-5p     |
| DCPS | hsa-miR-155-5p    |
| DCPS | hsa-miR-669a-3-3p |
| DCPS | hsa-miR-550       |
| DCPS | hsa-miR-380-5p    |
| DCPS | hsa-miR-6790-3p   |
| DCPS | hsa-miR-7182-3p   |
| DCPS | hsa-miR-365a-3p   |
| DCPS | hsa-miR-4653-5p   |

|      |                   |
|------|-------------------|
| DCPS | hsa-miR-3622a-3p  |
| DCPS | hsa-miR-515-3p    |
| DCPS | hsa-miR-4312      |
| DCPS | hsa-miR-2115-3p   |
| DCPS | hsa-miR-410-3p    |
| DCPS | hsa-miR-6894-3p   |
| DCPS | hsa-miR-1204      |
| DCPS | hsa-miR-133       |
| DCPS | hsa-miR-1243-3p   |
| DCPS | hsa-miR-500b-3p   |
| DCPS | hsa-miR-3191-3p   |
| DCPS | hsa-miR-6840-3p   |
| DCPS | hsa-miR-216-3p    |
| DCPS | hsa-miR-514a-5p   |
| DCPS | hsa-miR-32-5p     |
| DCPS | hsa-miR-548bb-3p  |
| DCPS | hsa-miR-7843-5p   |
| DCPS | hsa-miR-7053-5p   |
| DCPS | hsa-miR-4659b-5p  |
| DCPS | hsa-miR-5187-3p   |
| DCPS | hsa-miR-25-5p     |
| DCPS | hsa-miR-550b-2-5p |
| DCPS | hsa-miR-4293      |
| DCPS | hsa-miR-7183-3p   |
| DCPS | hsa-miR-3165      |
| DCPS | hsa-miR-6842-5p   |
| DCPS | hsa-miR-5583-5p   |
| DCPS | hsa-miR-7067-5p   |
| DCPS | hsa-miR-2371      |
| DCPS | hsa-miR-98-5p     |
| DCPS | hsa-miR-6505-3p   |
| DCPS | hsa-miR-7269-3p   |
| DCPS | hsa-miR-1-3p      |
| DCPS | hsa-miR-3134      |
| DCPS | hsa-miR-421       |
| DCPS | hsa-miR-697       |
| DCPS | hsa-miR-6127      |
| DCPS | hsa-miR-1301-3p   |
| DCPS | hsa-miR-3613-3p   |
| DCPS | hsa-miR-466-5p    |
| DCPS | hsa-miR-194-3p    |
| DCPS | hsa-miR-200c-5p   |
| DCPS | hsa-miR-210-3p    |
| DCPS | hsa-miR-324-3p    |
| DCPS | hsa-miR-505-3p.2  |
| DCPS | hsa-miR-3922-5p   |

|      |                   |
|------|-------------------|
| DCPS | hsa-miR-7119-5p   |
| DCPS | hsa-miR-6813-5p   |
| DCPS | hsa-miR-6783-5p   |
| DCPS | hsa-miR-7641      |
| DCPS | hsa-miR-181b-1-3p |
| DCPS | hsa-miR-6529-3p   |
| DCPS | hsa-miR-2382-3p   |
| DCPS | hsa-miR-4298      |
| DCPS | hsa-miR-6791-5p   |
| DCPS | hsa-miR-642a-5p   |
| DCPS | hsa-miR-7843-3p   |
| DCPS | hsa-miR-128-1-5p  |
| DCPS | hsa-miR-504       |
| DCPS | hsa-miR-152-5p    |
| DCPS | hsa-miR-7074-5p   |
| DCPS | hsa-miR-3606-5p   |
| DCPS | hsa-miR-150-5p    |
| DCPS | hsa-miR-2286      |
| DCPS | hsa-miR-6338      |
| DCPS | hsa-miR-4524a-3p  |
| DCPS | hsa-miR-7667-5p   |
| DCPS | hsa-miR-7065-3p   |
| DCPS | hsa-miR-4659a-5p  |
| DCPS | hsa-miR-466q      |
| DCPS | hsa-miR-3092-5p   |
| DCPS | hsa-miR-584-3p    |
| DCPS | hsa-miR-2284-5p   |
| DCPS | hsa-miR-1966-5p   |
| DCPS | hsa-miR-6939-5p   |
| DCPS | hsa-miR-4640-5p   |
| DCPS | hsa-miR-7657-5p   |
| DCPS | hsa-miR-548d-3p   |
| DCPS | hsa-miR-6975-3p   |
| DCPS | hsa-miR-4762-3p   |
| DCPS | hsa-miR-219a-2-3p |
| DCPS | hsa-miR-6729-3p   |
| DCPS | hsa-miR-6996-5p   |
| DCPS | hsa-miR-7152-3p   |
| DCPS | hsa-miR-873-5p    |
| DCPS | hsa-miR-454-3p    |
| DCPS | hsa-miR-2331-3p   |
| DCPS | hsa-miR-450a-2-3p |
| DCPS | hsa-miR-6873-3p   |
| DCPS | hsa-miR-105-5p    |
| DCPS | hsa-miR-548at-5p  |
| DCPS | hsa-miR-6981-5p   |

|      |                 |
|------|-----------------|
| DCPS | hsa-miR-448-5p  |
| DCPS | hsa-miR-7681-3p |
| DCPS | hsa-miR-103-5p  |
| DCPS | hsa-miR-3070-5p |
| DCPS | hsa-miR-2311    |
| DCPS | hsa-miR-7037-3p |
| DCPS | hsa-miR-619     |
| DCPS | hsa-miR-548x-5p |
| DCPS | hsa-miR-1245-3p |
| DCPS | hsa-miR-6794-3p |
| DCPS | hsa-miR-6995-3p |
| DCPS | hsa-miR-1264-5p |
| DCPS | hsa-miR-4477a   |
| DCPS | hsa-miR-7024-5p |
| DCPS | hsa-miR-520-3p  |
| DCPS | hsa-miR-4665-3p |
| DCPS | hsa-miR-6510-5p |
| DCPS | hsa-miR-4472    |
| DCPS | hsa-miR-7188-5p |
| DCPS | hsa-miR-196-5p  |
| DCPS | hsa-miR-656-3p  |
| DCPS | hsa-miR-6888-3p |
| DCPS | hsa-miR-668     |
| DCPS | hsa-miR-2368-3p |
| DCPS | hsa-miR-3084-5p |
| DCPS | hsa-miR-519b-3p |
| DCPS | hsa-miR-7191-3p |
| DCPS | hsa-miR-4532    |
| DCPS | hsa-miR-6950-5p |
| DCPS | hsa-miR-6935-3p |
| DCPS | hsa-miR-5580-3p |
| DCPS | hsa-miR-7275-3p |
| DCPS | hsa-miR-6809-5p |
| DCPS | hsa-miR-429     |
| DCPS | hsa-miR-626     |
| DCPS | hsa-miR-4999-3p |
| DCPS | hsa-miR-4420    |
| DCPS | hsa-miR-7203-3p |
| DCPS | hsa-miR-1827    |
| DCPS | hsa-miR-6940-3p |
| DCPS | hsa-miR-4650-5p |
| DCPS | hsa-miR-7028-5p |
| DCPS | hsa-miR-33a-3p  |
| DCPS | hsa-miR-7181-3p |
| DCPS | hsa-miR-3544    |
| DCPS | hsa-miR-4638-3p |

|      |                   |
|------|-------------------|
| DCPS | hsa-miR-3584-5p   |
| DCPS | hsa-miR-155-5p    |
| DCPS | hsa-miR-7188-3p   |
| DCPS | hsa-miR-5583-3p   |
| DCPS | hsa-miR-3126-5p   |
| DCPS | hsa-miR-3591-3p   |
| DCPS | hsa-miR-450a      |
| DCPS | hsa-miR-7213-3p   |
| DCPS | hsa-miR-3110-3p   |
| DCPS | hsa-miR-301a-5p   |
| DCPS | hsa-miR-6916-5p   |
| DCPS | hsa-miR-939-3p    |
| DCPS | hsa-miR-557       |
| DCPS | hsa-miR-8829      |
| DCPS | hsa-miR-6874-5p   |
| DCPS | hsa-miR-6856-3p   |
| DCPS | hsa-miR-4329      |
| DCPS | hsa-miR-659-5p    |
| DCPS | hsa-miR-4675      |
| DCPS | hsa-miR-488-3p    |
| DCPS | hsa-miR-433-5p    |
| DCPS | hsa-miR-5090      |
| DCPS | hsa-miR-6945-5p   |
| DCPS | hsa-miR-2276-5p   |
| DCPS | hsa-miR-5697      |
| DCPS | hsa-miR-4446-3p   |
| DCPS | hsa-miR-361-5p    |
| DCPS | hsa-miR-4427      |
| DCPS | hsa-miR-8113      |
| DCPS | hsa-miR-6756-3p   |
| DCPS | hsa-miR-513c-5p   |
| DCPS | hsa-miR-628-5p    |
| DCPS | hsa-miR-7296-5p   |
| DCPS | hsa-miR-550a-3-5p |
| DCPS | hsa-miR-744-3p    |
| DCPS | hsa-miR-8848      |
| DCPS | hsa-miR-4684-5p   |
| DCPS | hsa-miR-7168-3p   |
| DCPS | hsa-miR-1245b-5p  |
| DCPS | hsa-miR-6416-3p   |
| DCPS | hsa-miR-4474-3p   |
| DCPS | hsa-miR-4699-5p   |
| DCPS | hsa-miR-5582-3p   |
| DCPS | hsa-miR-3665      |
| DCPS | hsa-miR-409       |
| DCPS | hsa-miR-515-5p    |

|      |                  |
|------|------------------|
| DCPS | hsa-miR-432-5p   |
| DCPS | hsa-miR-576-5p   |
| DCPS | hsa-miR-4505     |
| DCPS | hsa-miR-542-5p   |
| DCPS | hsa-miR-548ay-3p |
| DCPS | hsa-miR-5133     |
| DCPS | hsa-miR-200a-5p  |
| DCPS | hsa-miR-2458     |
| DCPS | hsa-miR-6504-3p  |
| DCPS | hsa-miR-3616-3p  |
| DCPS | hsa-miR-644a     |
| DCPS | hsa-miR-742-5p   |
| DCPS | hsa-miR-548e-3p  |
| DCPS | hsa-miR-190-5p   |
| DCPS | hsa-miR-2330-5p  |
| DCPS | hsa-miR-483-3p   |
| DCPS | hsa-miR-8886     |
| DCPS | hsa-miR-2115-5p  |
| DCPS | hsa-miR-374      |
| DCPS | hsa-miR-7087-5p  |
| DCPS | hsa-miR-548aa    |
| DCPS | hsa-miR-4531     |
| DCPS | hsa-miR-4735-5p  |
| DCPS | hsa-miR-192-3p   |
| DCPS | hsa-miR-570-3p   |
| DCPS | hsa-miR-3913-5p  |
| DCPS | hsa-miR-767-5p   |
| DCPS | hsa-miR-6987-5p  |
| DCPS | hsa-miR-8840     |
| DCPS | hsa-miR-1197     |
| DCPS | hsa-miR-142-3p   |
| DCPS | hsa-miR-2373-3p  |
| DCPS | hsa-miR-3167-5p  |
| DCPS | hsa-miR-6392-3p  |
| DCPS | hsa-miR-3614-5p  |
| DCPS | hsa-miR-4797-5p  |
| DCPS | hsa-miR-369-3p   |
| DCPS | hsa-miR-6857-3p  |
| DCPS | hsa-miR-1950     |
| DCPS | hsa-miR-215-3p   |
| DCPS | hsa-miR-6736-3p  |
| DCPS | hsa-miR-6715-5p  |
| DCPS | hsa-miR-6811-3p  |
| DCPS | hsa-miR-7110-5p  |
| DCPS | hsa-miR-4695-5p  |
| DCPS | hsa-miR-1236-5p  |



|      |                  |
|------|------------------|
| DCPS | hsa-miR-6072     |
| DCPS | hsa-miR-743b-3p  |
| DCPS | hsa-miR-708-5p   |
| DCPS | hsa-miR-2301     |
| DCPS | hsa-miR-6749-3p  |
| DCPS | hsa-miR-4726-3p  |
| DCPS | hsa-miR-7018-3p  |
| DCPS | hsa-miR-129-2-3p |
| DCPS | hsa-miR-7025-5p  |
| DCPS | hsa-miR-137-3p   |
| DCPS | hsa-miR-1184     |
| DCPS | hsa-miR-4746-3p  |
| DCPS | hsa-miR-208a-5p  |
| DCPS | hsa-miR-3541     |
| DCPS | hsa-miR-6992-5p  |
| DCPS | hsa-miR-548t-3p  |
| DCPS | hsa-miR-1895     |
| DCPS | hsa-miR-6823-5p  |
| DCPS | hsa-miR-3174     |
| DCPS | hsa-miR-706      |
| DCPS | hsa-miR-499-5p   |
| DCPS | hsa-miR-7159-5p  |
| DCPS | hsa-miR-6529     |
| DCPS | hsa-miR-7249-3p  |
| DCPS | hsa-miR-2421     |
| DCPS | hsa-miR-7006-3p  |
| DCPS | hsa-miR-6405     |
| DCPS | hsa-miR-372-5p   |
| DCPS | hsa-miR-6747-3p  |
| DCPS | hsa-miR-2897     |
| DCPS | hsa-miR-296-5p   |
| DCPS | hsa-miR-7686-5p  |
| DCPS | hsa-miR-93-5p    |
| DCPS | hsa-miR-7207-5p  |
| DCPS | hsa-miR-7217-5p  |
| DCPS | hsa-miR-6827-5p  |
| DCPS | hsa-miR-7298-3p  |
| DCPS | hsa-miR-6368     |
| DCPS | hsa-miR-29a-5p   |
| DCPS | hsa-miR-7652-3p  |
| DCPS | hsa-miR-3691-3p  |
| DCPS | hsa-miR-1249-5p  |
| DCPS | hsa-miR-6876-3p  |
| DCPS | hsa-miR-184      |
| DCPS | hsa-miR-3543     |
| DCPS | hsa-miR-7186-3p  |

|      |                   |
|------|-------------------|
| DCPS | hsa-miR-4743-3p   |
| DCPS | hsa-miR-597       |
| DCPS | hsa-miR-6332      |
| DCPS | hsa-miR-510       |
| DCPS | hsa-miR-4717-5p   |
| DCPS | hsa-miR-3156-3p   |
| DCPS | hsa-miR-5704      |
| DCPS | hsa-miR-339-5p    |
| DCPS | hsa-miR-8814      |
| DCPS | hsa-miR-8872      |
| DCPS | hsa-miR-548n      |
| DCPS | hsa-miR-3622b-3p  |
| DCPS | hsa-miR-3095-3p   |
| DCPS | hsa-miR-6752-3p   |
| DCPS | hsa-miR-7216-5p   |
| DCPS | hsa-miR-6879-3p   |
| DCPS | hsa-miR-379-5p    |
| DCPS | hsa-miR-4779      |
| DCPS | hsa-miR-5693      |
| DCPS | hsa-miR-6766-5p   |
| DCPS | hsa-miR-1197-3p   |
| DCPS | hsa-miR-6743-5p   |
| DCPS | hsa-miR-505-5p    |
| DCPS | hsa-miR-6720-5p   |
| DCPS | hsa-miR-6827-3p   |
| DCPS | hsa-miR-579-3p    |
| DCPS | hsa-miR-3119      |
| DCPS | hsa-miR-7660-3p   |
| DCPS | hsa-miR-539-3p    |
| DCPS | hsa-miR-873a-5p.1 |
| DCPS | hsa-miR-212-3p    |
| DCPS | hsa-miR-7386j-3p  |
| DCPS | hsa-miR-3121-3p   |
| DCPS | hsa-miR-6726-5p   |
| DCPS | hsa-miR-6974-5p   |
| DCPS | hsa-miR-6727-3p   |
| DCPS | hsa-miR-128-3p    |
| DCPS | hsa-miR-5108      |
| DCPS | hsa-miR-1912-3p   |
| DCPS | hsa-miR-7676-5p   |
| DCPS | hsa-miR-615-3p    |
| DCPS | hsa-miR-6802-5p   |
| DCPS | hsa-miR-301-5p    |
| DCPS | hsa-miR-4436b-5p  |
| DCPS | hsa-miR-29-3p     |
| DCPS | hsa-miR-4252      |

|      |                  |
|------|------------------|
| DCPS | hsa-miR-892c-3p  |
| DCPS | hsa-miR-7977     |
| DCPS | hsa-miR-7274-3p  |
| DCPS | hsa-miR-3474     |
| DCPS | hsa-miR-8090     |
| DCPS | hsa-miR-375-3p   |
| DCPS | hsa-miR-6795-3p  |
| DCPS | hsa-miR-1249-3p  |
| DCPS | hsa-miR-4446     |
| DCPS | hsa-miR-7215-3p  |
| DCPS | hsa-miR-4428     |
| DCPS | hsa-miR-203      |
| DCPS | hsa-miR-124-3p.1 |
| DCPS | hsa-miR-3064-5p  |
| DCPS | hsa-miR-3569     |
| DCPS | hsa-miR-3121-3p  |
| DCPS | hsa-miR-30a-3p   |
| DCPS | hsa-miR-6882-3p  |
| DCPS | hsa-miR-3147     |
| DCPS | hsa-miR-3084-3p  |
| DCPS | hsa-miR-4697-5p  |
| DCPS | hsa-miR-518      |
| DCPS | hsa-miR-98-5p    |
| DCPS | hsa-miR-24-3p    |
| DCPS | hsa-miR-6984-5p  |
| DCPS | hsa-miR-5011-5p  |
| DCPS | hsa-miR-548ar-3p |
| DCPS | hsa-miR-1323-3p  |
| DCPS | hsa-miR-3607-5p  |
| DCPS | hsa-miR-343      |
| DCPS | hsa-miR-3653-5p  |
| DCPS | hsa-miR-2387     |
| DCPS | hsa-miR-6722-3p  |
| DCPS | hsa-miR-128      |
| DCPS | hsa-miR-3074-5p  |
| DCPS | hsa-miR-7110-3p  |
| DCPS | hsa-let-7c-3p    |
| DCPS | hsa-miR-571      |
| DCPS | hsa-miR-6417     |
| DCPS | hsa-miR-7202-5p  |
| DCPS | hsa-miR-145a-3p  |
| DCPS | hsa-miR-424-5p   |
| DCPS | hsa-miR-6077     |
| DCPS | hsa-miR-197-3p   |
| DCPS | hsa-miR-1233-3p  |
| DCPS | hsa-miR-4768-3p  |

|      |                  |
|------|------------------|
| DCPS | hsa-miR-6917-3p  |
| DCPS | hsa-miR-1245b-3p |
| DCPS | hsa-miR-6721-5p  |
| DCPS | hsa-miR-302bd    |
| DCPS | hsa-miR-294      |
| DCPS | hsa-miR-382-5p   |
| DCPS | hsa-miR-7166-5p  |
| DCPS | hsa-miR-34a-3p   |
| DCPS | hsa-miR-6132     |
| DCPS | hsa-miR-6715b-5p |
| DCPS | hsa-miR-4710     |
| DCPS | hsa-miR-1323     |
| DCPS | hsa-miR-184-5p   |
| DCPS | hsa-miR-6995-5p  |
| DCPS | hsa-miR-7057-5p  |
| DCPS | hsa-miR-6851-5p  |
| DCPS | hsa-miR-548a-3p  |
| DCPS | hsa-miR-181-3p   |
| DCPS | hsa-miR-33       |
| DCPS | hsa-miR-1982-3p  |
| DCPS | hsa-miR-338-3p   |
| DCPS | hsa-miR-134-5p   |
| DCPS | hsa-miR-223-3p   |
| DCPS | hsa-miR-652-5p   |
| DCPS | hsa-miR-7227-3p  |
| DCPS | hsa-miR-292b-3p  |
| DCPS | hsa-miR-2439-5p  |
| DCPS | hsa-miR-142-3p.1 |
| DCPS | hsa-miR-6930-3p  |
| DCPS | hsa-miR-7354-5p  |
| DCPS | hsa-miR-1976     |
| DCPS | hsa-miR-342-5p   |
| DCPS | hsa-miR-669      |
| DCPS | hsa-miR-1231-5p  |
| DCPS | hsa-miR-669h-5p  |
| DCPS | hsa-miR-607      |
| DCPS | hsa-miR-4742-3p  |
| DCPS | hsa-miR-502-5p   |
| DCPS | hsa-miR-133b     |
| DCPS | hsa-miR-130-5p   |
| DCPS | hsa-miR-19-3p    |
| DCPS | hsa-miR-4434     |
| DCPS | hsa-miR-7185-3p  |
| DCPS | hsa-miR-7850-5p  |
| DCPS | hsa-miR-143-5p   |
| DCPS | hsa-miR-124      |

|      |                 |
|------|-----------------|
| DCPS | hsa-miR-5000-3p |
| DCPS | hsa-miR-195-5p  |
| DCPS | hsa-miR-146-5p  |
| DCPS | hsa-miR-7176-3p |
| DCPS | hsa-miR-3173-5p |
| DCPS | hsa-miR-8791    |
| DCPS | hsa-miR-320b    |
| DCPS | hsa-miR-4254    |
| DCPS | hsa-miR-548e-5p |
| DCPS | hsa-miR-9768-3p |
| DCPS | hsa-miR-6540-3p |
| DCPS | hsa-miR-8900    |
| DCPS | hsa-miR-1207-5p |
| DCPS | hsa-miR-378g    |
| DCPS | hsa-miR-3667-3p |
| DCPS | hsa-miR-4645-5p |
| DCPS | hsa-miR-4445-3p |
| DCPS | hsa-miR-221-5p  |
| DCPS | hsa-miR-7119-3p |
| DCPS | hsa-miR-6909-3p |
| DCPS | hsa-miR-6321    |
| DCPS | hsa-miR-4263    |
| DCPS | hsa-miR-6839-3p |
| DCPS | hsa-miR-4646-3p |
| DCPS | hsa-miR-361-3p  |
| DCPS | hsa-miR-3557-3p |
| DCPS | hsa-miR-7222-3p |
| DCPS | hsa-miR-8846    |
| DCPS | hsa-miR-7236-5p |
| DCPS | hsa-miR-3942-3p |
| DCPS | hsa-miR-8100    |
| DCPS | hsa-miR-4520-5p |
| DCPS | hsa-miR-1266    |
| DCPS | hsa-miR-6804-3p |
| DCPS | hsa-miR-6773-3p |
| DCPS | hsa-miR-3685    |
| DCPS | hsa-miR-465d-3p |
| DCPS | hsa-miR-218-5p  |
| DCPS | hsa-miR-351-5p  |
| DCPS | hsa-miR-3593-5p |
| DCPS | hsa-miR-24-3p   |
| DCPS | hsa-miR-384-5p  |
| DCPS | hsa-miR-3688-3p |
| DCPS | hsa-miR-2322-3p |
| DCPS | hsa-miR-6912-5p |
| DCPS | hsa-miR-7011-5p |

|      |                  |
|------|------------------|
| DCPS | hsa-miR-3127-3p  |
| DCPS | hsa-miR-6929-5p  |
| DCPS | hsa-miR-3473     |
| DCPS | hsa-miR-4786-3p  |
| DCPS | hsa-miR-140-3p   |
| DCPS | hsa-miR-5587-5p  |
| DCPS | hsa-miR-6764-5p  |
| DCPS | hsa-miR-7687-3p  |
| DCPS | hsa-miR-879-5p   |
| DCPS | hsa-miR-5588-3p  |
| DCPS | hsa-miR-646      |
| DCPS | hsa-miR-6500-3p  |
| DCPS | hsa-miR-190a-5p  |
| DCPS | hsa-miR-411-5p.1 |
| DCPS | hsa-miR-1224     |
| DCPS | hsa-miR-3655     |
| DCPS | hsa-miR-7184-5p  |
| DCPS | hsa-miR-4728-5p  |
| DCPS | hsa-miR-873-5p.2 |
| DCPS | hsa-miR-667-5p   |
| DCPS | hsa-let-7a-2-3p  |
| DCPS | hsa-miR-548f-3p  |
| DCPS | hsa-miR-26-3p    |
| DCPS | hsa-miR-374b-3p  |
| DCPS | hsa-miR-539-5p   |
| DCPS | hsa-miR-2317     |
| DCPS | hsa-miR-4657     |
| DCPS | hsa-miR-5008-3p  |
| DCPS | hsa-miR-7197-3p  |
| DCPS | hsa-miR-1251-5p  |
| DCPS | hsa-miR-6751-3p  |
| DCPS | hsa-miR-6930-5p  |
| DCPS | hsa-miR-30-5p    |
| DCPS | hsa-miR-7004-3p  |
| DCPS | hsa-miR-7153-3p  |
| DCPS | hsa-miR-669p-3p  |
| DCPS | hsa-miR-548c-3p  |
| DCPS | hsa-miR-329-3p   |
| DCPS | hsa-miR-3187-5p  |
| DCPS | hsa-miR-7242-3p  |
| DCPS | hsa-miR-4687-3p  |
| DCPS | hsa-miR-3198     |
| DCPS | hsa-miR-4433a-3p |
| DCPS | hsa-miR-637      |
| DCPS | hsa-miR-742-3p   |
| DCPS | hsa-miR-346      |

|      |                  |
|------|------------------|
| DCPS | hsa-miR-4761-5p  |
| DCPS | hsa-miR-6765-3p  |
| DCPS | hsa-miR-188-3p   |
| DCPS | hsa-miR-20a-3p   |
| DCPS | hsa-miR-2053     |
| DCPS | hsa-miR-138-5p   |
| DCPS | hsa-miR-6791-3p  |
| DCPS | hsa-miR-4701-3p  |
| DCPS | hsa-miR-7973     |
| DCPS | hsa-miR-149-3p   |
| DCPS | hsa-miR-2389     |
| DCPS | hsa-miR-2483-5p  |
| DCPS | hsa-miR-302c-3p  |
| DCPS | hsa-miR-6942-5p  |
| DCPS | hsa-miR-7238-3p  |
| DCPS | hsa-miR-6907-5p  |
| DCPS | hsa-miR-8823     |
| DCPS | hsa-miR-4659b-3p |
| DCPS | hsa-miR-3547-5p  |
| DCPS | hsa-miR-6943-5p  |
| DCPS | hsa-miR-4700-5p  |
| DCPS | hsa-miR-582-3p   |
| DCPS | hsa-miR-4686     |
| DCPS | hsa-miR-4481     |
| DCPS | hsa-miR-1227-3p  |
| DCPS | hsa-miR-210      |
| DCPS | hsa-miR-4278     |
| DCPS | hsa-miR-4443     |
| DCPS | hsa-miR-4530     |
| DCPS | hsa-miR-3714     |
| DCPS | hsa-miR-7022-5p  |
| DCPS | hsa-miR-503-3p   |
| DCPS | hsa-miR-7046-5p  |
| DCPS | hsa-miR-7180     |
| DCPS | hsa-miR-17-3p    |
| DCPS | hsa-miR-290b-5p  |
| DCPS | hsa-miR-4270     |
| DCPS | hsa-miR-4683     |
| DCPS | hsa-miR-5615-5p  |
| DCPS | hsa-miR-3188     |
| DCPS | hsa-miR-4772-3p  |
| DCPS | hsa-miR-873-3p   |
| DCPS | hsa-miR-6730-3p  |
| DCPS | hsa-miR-4663     |
| DCPS | hsa-miR-1941-3p  |
| DCPS | hsa-miR-150-5p   |

|      |                    |
|------|--------------------|
| DCPS | hsa-miR-330-3p.1   |
| DCPS | hsa-miR-599        |
| DCPS | hsa-miR-7398-5p    |
| DCPS | hsa-miR-758-3p     |
| DCPS | hsa-miR-6719-3p    |
| DCPS | hsa-miR-4268       |
| DCPS | hsa-miR-6989-5p    |
| DCPS | hsa-miR-452-5p     |
| DCPS | hsa-miR-377-3p     |
| DCPS | hsa-miR-4743-5p    |
| DCPS | hsa-miR-9500       |
| DCPS | hsa-miR-372-3p     |
| DCPS | hsa-miR-320-3p     |
| DCPS | hsa-miR-616-5p     |
| DCPS | hsa-miR-4713-5p    |
| DCPS | hsa-miR-6769a-3p   |
| DCPS | hsa-miR-346-3p     |
| DCPS | hsa-miR-769        |
| DCPS | hsa-miR-1343       |
| DCPS | hsa-miR-7043-5p    |
| DCPS | hsa-miR-140-5p     |
| DCPS | hsa-miR-881-5p     |
| DCPS | hsa-miR-551-5p     |
| DCPS | hsa-miR-506-3p     |
| DCPS | hsa-miR-149-5p     |
| DCPS | hsa-miR-7013-5p    |
| DCPS | hsa-miR-7157-5p    |
| DCPS | hsa-miR-3189-5p    |
| DCPS | hsa-miR-4732-3p    |
| DCPS | hsa-miR-525-5p     |
| DCPS | hsa-miR-698-3p     |
| DCPS | hsa-miR-143-3p     |
| DCPS | hsa-miR-2917       |
| DCPS | hsa-miR-451b       |
| DCPS | hsa-miR-579        |
| DCPS | hsa-miR-6818-3p    |
| DCPS | hsa-miR-6122-3p    |
| DCPS | hsa-miR-4310       |
| DCPS | hsa-miR-1468-3p    |
| DCPS | hsa-miR-485-5p     |
| DCPS | hsa-miR-7150       |
| DCPS | hsa-miR-3976       |
| DCPS | hsa-miR-7022-3p    |
| DCPS | hsa-miR-223-3p     |
| DCPS | hsa-miR-7094b-2-5p |
| DCPS | hsa-miR-6376       |



|      |                  |
|------|------------------|
| DCPS | hsa-miR-617      |
| DCPS | hsa-miR-2467-3p  |
| DCPS | hsa-miR-498      |
| DCPS | hsa-miR-3544-5p  |
| DCPS | hsa-miR-483-3p   |
| DCPS | hsa-miR-1254     |
| DCPS | hsa-miR-6879-5p  |
| DCPS | hsa-miR-5011-3p  |
| DCPS | hsa-miR-937-5p   |
| DCPS | hsa-miR-5119     |
| DCPS | hsa-miR-4440     |
| DCPS | hsa-miR-28-5p    |
| DCPS | hsa-miR-1227-5p  |
| DCPS | hsa-miR-181      |
| DCPS | hsa-miR-4436b-3p |
| DCPS | hsa-miR-214-3p   |
| DCPS | hsa-miR-644a     |
| DCPS | hsa-miR-5001-3p  |
| DCPS | hsa-miR-6990-3p  |
| DCPS | hsa-miR-455-3p.2 |
| DCPS | hsa-miR-1208     |
| DCPS | hsa-miR-200a-3p  |
| DCPS | hsa-miR-3157-3p  |
| DCPS | hsa-miR-466      |
| DCPS | hsa-miR-6754-5p  |
| DCPS | hsa-miR-4459     |
| DCPS | hsa-miR-4297     |
| DCPS | hsa-miR-6810-5p  |
| DCPS | hsa-miR-1291     |
| DCPS | hsa-miR-8060     |
| DCPS | hsa-miR-3109-3p  |
| DCPS | hsa-miR-892a     |
| DCPS | hsa-miR-345-5p   |
| DCPS | hsa-miR-8862     |
| DCPS | hsa-miR-4652-3p  |
| DCPS | hsa-miR-4508     |
| DCPS | hsa-miR-3192-5p  |
| DCPS | hsa-miR-1282     |
| DCPS | hsa-miR-7021-3p  |
| DCPS | hsa-miR-5008-5p  |
| DCPS | hsa-miR-8106     |
| DCPS | hsa-miR-1909-5p  |
| DCPS | hsa-miR-938      |
| DCPS | hsa-miR-7026-5p  |
| DCPS | hsa-miR-448      |
| DCPS | hsa-miR-3945     |

|      |                  |
|------|------------------|
| DCPS | hsa-miR-183-5p   |
| DCPS | hsa-miR-6909-5p  |
| DCPS | hsa-miR-7064-5p  |
| DCPS | hsa-miR-7662-5p  |
| DCPS | hsa-miR-6847-3p  |
| DCPS | hsa-miR-487-5p   |
| DCPS | hsa-miR-331-3p   |
| DCPS | hsa-miR-4758-5p  |
| DCPS | hsa-miR-6499-3p  |
| DCPS | hsa-miR-4721     |
| DCPS | hsa-miR-6537-5p  |
| DCPS | hsa-miR-7855-5p  |
| DCPS | hsa-miR-6780b-5p |
| DCPS | hsa-miR-6790-5p  |
| DCPS | hsa-miR-7079-5p  |
| DCPS | hsa-miR-874      |
| DCPS | hsa-miR-5004-3p  |
| DCPS | hsa-miR-17-5p    |
| DCPS | hsa-miR-1185-5p  |
| DCPS | hsa-miR-549-5p   |
| DCPS | hsa-miR-6792-3p  |
| DCPS | hsa-miR-4667     |
| DCPS | hsa-miR-7685-3p  |
| DCPS | hsa-miR-6934-3p  |
| DCPS | hsa-miR-6826-3p  |
| DCPS | hsa-miR-3194-5p  |
| DCPS | hsa-miR-516a-3p  |
| DCPS | hsa-miR-6506-5p  |
| DCPS | hsa-miR-4253     |
| DCPS | hsa-miR-143-3p   |
| DCPS | hsa-miR-6868-5p  |
| DCPS | hsa-miR-548l     |
| DCPS | hsa-miR-7170-3p  |
| DCPS | hsa-miR-921      |
| DCPS | hsa-miR-6781-3p  |
| DCPS | hsa-miR-593-3p   |
| DCPS | hsa-miR-6829-3p  |
| DCPS | hsa-miR-7331-5p  |
| DCPS | hsa-miR-344g-3p  |
| DCPS | hsa-miR-6511-3p  |
| DCPS | hsa-miR-885      |
| DCPS | hsa-miR-563      |
| DCPS | hsa-miR-4720-5p  |
| DCPS | hsa-miR-1967     |
| DCPS | hsa-miR-2285z    |
| DCPS | hsa-miR-7220-3p  |

|      |                   |
|------|-------------------|
| DCPS | hsa-miR-6780a-3p  |
| DCPS | hsa-miR-510-5p    |
| DCPS | hsa-miR-4709-5p   |
| DCPS | hsa-miR-4437      |
| DCPS | hsa-miR-6776-5p   |
| DCPS | hsa-miR-331-3p    |
| DCPS | hsa-miR-4803      |
| DCPS | hsa-miR-6808-3p   |
| DCPS | hsa-miR-2377      |
| DCPS | hsa-miR-499       |
| DCPS | hsa-miR-133cd-5p  |
| DCPS | hsa-miR-8807      |
| DCPS | hsa-miR-3920      |
| DCPS | hsa-miR-2422      |
| DCPS | hsa-miR-3063-3p   |
| DCPS | hsa-miR-378-3p    |
| DCPS | hsa-miR-6885-3p   |
| DCPS | hsa-miR-6418-5p   |
| DCPS | hsa-miR-34b-3p    |
| DCPS | hsa-miR-6513-3p   |
| DCPS | hsa-miR-7184-3p   |
| DCPS | hsa-miR-6985-5p   |
| DCPS | hsa-miR-5120      |
| DCPS | hsa-miR-1224-3p   |
| DCPS | hsa-miR-6758-5p   |
| DCPS | hsa-miR-7082-5p   |
| DCPS | hsa-miR-4794      |
| DCPS | hsa-miR-4802-5p   |
| DCPS | hsa-miR-511-5p    |
| DCPS | hsa-miR-6782-5p   |
| DCPS | hsa-miR-1271-3p   |
| DCPS | hsa-miR-4526      |
| DCPS | hsa-miR-3679-3p   |
| DCPS | hsa-miR-5134-5p   |
| DCPS | hsa-miR-3692-5p   |
| DCPS | hsa-miR-3617-3p   |
| DCPS | hsa-miR-125b-2-3p |
| DCPS | hsa-miR-1240      |
| DCPS | hsa-miR-3651      |
| DCPS | hsa-miR-7023-3p   |
| DCPS | hsa-let-7ag-3p    |
| DCPS | hsa-miR-20b-3p    |
| DCPS | hsa-miR-677       |
| DCPS | hsa-miR-383-5p.1  |
| DCPS | hsa-miR-6780a-5p  |
| DCPS | hsa-miR-7-5p      |

|       |                  |
|-------|------------------|
| DCPS  | hsa-miR-3691-5p  |
| DCPS  | hsa-miR-4521     |
| DCPS  | hsa-miR-7107-5p  |
| DCPS  | hsa-miR-3108-3p  |
| DCPS  | hsa-miR-5695     |
| DCPS  | hsa-miR-6742-3p  |
| DCPS  | hsa-miR-497-5p   |
| DCPS  | hsa-miR-344-3p   |
| DCPS  | hsa-miR-605-3p   |
| DCPS  | hsa-miR-6947-3p  |
| DCPS  | hsa-miR-6794-5p  |
| DCPS  | hsa-miR-6377     |
| DCPS  | hsa-miR-7241-3p  |
| DCPS  | hsa-miR-4320     |
| DCPS  | hsa-miR-760-5p   |
| DCPS  | hsa-miR-1962     |
| EIF3D | hsa-miR-590-3p   |
| EIF3D | hsa-miR-4650     |
| EIF3D | hsa-miR-513b-3p  |
| EIF3D | hsa-miR-548u     |
| EIF3D | hsa-miR-3095-3p  |
| EIF3D | hsa-miR-4436b-5p |
| EIF3D | hsa-miR-7168-5p  |
| EIF3D | hsa-miR-6768-3p  |
| EIF3D | hsa-miR-4514     |
| EIF3D | hsa-miR-6517     |
| EIF3D | hsa-miR-7084-3p  |
| EIF3D | hsa-miR-4419a    |
| EIF3D | hsa-miR-126-3p   |
| EIF3D | hsa-miR-3165     |
| EIF3D | hsa-miR-4655-3p  |
| EIF3D | hsa-miR-4474-5p  |
| EIF3D | hsa-miR-1843     |
| EIF3D | hsa-miR-8088     |
| EIF3D | hsa-miR-7212-3p  |
| EIF3D | hsa-miR-3126-5p  |
| EIF3D | hsa-miR-215      |
| EIF3D | hsa-miR-508-5p   |
| EIF3D | hsa-miR-7161-5p  |
| EIF3D | hsa-miR-6946-5p  |
| EIF3D | hsa-miR-28-5p    |
| EIF3D | hsa-miR-2472     |
| EIF3D | hsa-miR-7683-3p  |
| EIF3D | hsa-miR-3153     |
| EIF3D | hsa-miR-6934-3p  |
| EIF3D | hsa-miR-5584-5p  |

|       |                  |
|-------|------------------|
| EIF3D | hsa-miR-6509-3p  |
| EIF3D | hsa-miR-763      |
| EIF3D | hsa-miR-1721     |
| EIF3D | hsa-miR-3069-3p  |
| EIF3D | hsa-miR-6392-3p  |
| EIF3D | hsa-miR-8854     |
| EIF3D | hsa-miR-98-5p    |
| EIF3D | hsa-miR-350      |
| EIF3D | hsa-miR-7032-3p  |
| EIF3D | hsa-miR-451b     |
| EIF3D | hsa-miR-8080     |
| EIF3D | hsa-miR-4686     |
| EIF3D | hsa-miR-185-5p   |
| EIF3D | hsa-miR-6511a-5p |
| EIF3D | hsa-miR-1910-3p  |
| EIF3D | hsa-miR-190a-3p  |
| EIF3D | hsa-miR-205-3p   |
| EIF3D | hsa-miR-6315     |
| EIF3D | hsa-miR-8485     |
| EIF3D | hsa-miR-7010-5p  |
| EIF3D | hsa-miR-2320-5p  |
| EIF3D | hsa-miR-331-5p   |
| EIF3D | hsa-miR-7014-5p  |
| EIF3D | hsa-miR-7688-5p  |
| EIF3D | hsa-miR-1839     |
| EIF3D | hsa-miR-6786-5p  |
| EIF3D | hsa-miR-766-3p   |
| EIF3D | hsa-miR-6739-5p  |
| EIF3D | hsa-miR-6511-5p  |
| EIF3D | hsa-miR-708-5p   |
| EIF3D | hsa-miR-3202     |
| EIF3D | hsa-miR-302-5p   |
| EIF3D | hsa-miR-5011-5p  |
| EIF3D | hsa-let-7-5p     |
| EIF3D | hsa-miR-192-5p   |
| EIF3D | hsa-miR-6127     |
| EIF3D | hsa-miR-6996-5p  |
| EIF3D | hsa-miR-7027-5p  |
| EIF3D | hsa-miR-452-3p   |
| EIF3D | hsa-miR-484      |
| EIF3D | hsa-miR-3919     |
| EIF3D | hsa-miR-688      |
| EIF3D | hsa-miR-4510     |
| EIF3D | hsa-miR-3059-5p  |
| EIF3D | hsa-miR-6733-5p  |
| EIF3D | hsa-miR-7669-3p  |

|        |                  |
|--------|------------------|
| EIF3D  | hsa-miR-6119-5p  |
| EIF3D  | hsa-miR-670-3p   |
| EIF3D  | hsa-miR-3557-3p  |
| EIF3D  | hsa-miR-6133     |
| EIF3D  | hsa-miR-6129     |
| EIF3D  | hsa-miR-4692     |
| EIF3D  | hsa-miR-138-3p   |
| EIF3D  | hsa-miR-6834-5p  |
| EIF3D  | hsa-let-7        |
| EIF3D  | hsa-miR-766-3p   |
| EIF3D  | hsa-miR-7166-3p  |
| EIF3D  | hsa-miR-424-3p   |
| EIF3D  | hsa-miR-4756-3p  |
| EIF3D  | hsa-miR-3190-3p  |
| EIF3D  | hsa-miR-4533     |
| EIF3D  | hsa-miR-6130     |
| EIF4A1 | hsa-miR-7070-5p  |
| EIF4A1 | hsa-miR-1843b-5p |
| EIF4A1 | hsa-miR-1545a-3p |
| EIF4A1 | hsa-miR-5589-5p  |
| EIF4A1 | hsa-miR-6836-3p  |
| EIF4A1 | hsa-miR-2459     |
| EIF4A1 | hsa-miR-6927-5p  |
| EIF4A1 | hsa-miR-3109-3p  |
| EIF4A1 | hsa-miR-7673-3p  |
| EIF4A1 | hsa-miR-409      |
| EIF4A1 | hsa-miR-887-5p   |
| EIF4A1 | hsa-miR-4272     |
| EIF4A1 | hsa-miR-294-5p   |
| EIF4A1 | hsa-miR-3912-5p  |
| EIF4A1 | hsa-miR-34b-3p   |
| EIF4A1 | hsa-miR-664-5p   |
| EIF4A1 | hsa-miR-506-5p   |
| EIF4A1 | hsa-miR-6856-3p  |
| EIF4A1 | hsa-miR-7398u-3p |
| EIF4A1 | hsa-miR-6845-3p  |
| EIF4A1 | hsa-miR-30c-1-3p |
| EIF4A1 | hsa-miR-2406     |
| EIF4A1 | hsa-miR-7010-3p  |
| EIF4A1 | hsa-miR-2324     |
| EIF4A1 | hsa-miR-7196-5p  |
| EIF4A1 | hsa-miR-133-3p.1 |
| EIF4A1 | hsa-miR-330-5p   |
| EIF4A1 | hsa-miR-154-5p   |
| EIF4A1 | hsa-miR-6976-5p  |
| EIF4A1 | hsa-miR-3557-5p  |

|        |                  |
|--------|------------------|
| EIF4A1 | hsa-let-7a-3p    |
| EIF4A1 | hsa-miR-548az-5p |
| EIF4A1 | hsa-miR-6779-5p  |
| EIF4A1 | hsa-miR-7041-3p  |
| EIF4A1 | hsa-miR-204-3p   |
| EIF4A1 | hsa-miR-3562     |
| EIF4A1 | hsa-miR-7000-5p  |
| EIF4A1 | hsa-miR-8804     |
| EIF4A1 | hsa-miR-566      |
| EIF4A1 | hsa-miR-516b-5p  |
| EIF4A1 | hsa-miR-4763-3p  |
| EIF4A1 | hsa-miR-154a     |
| EIF4A1 | hsa-miR-7864     |
| EIF4A1 | hsa-miR-7178-5p  |
| EIF4A1 | hsa-miR-7280-3p  |
| EIF4A1 | hsa-miR-7118-5p  |
| EIF4A1 | hsa-miR-204-5p   |
| EIF4A1 | hsa-miR-3473     |
| EIF4A1 | hsa-miR-8880     |
| EIF4A1 | hsa-miR-377-3p   |
| EIF4A1 | hsa-miR-33-3p    |
| EIF4A1 | hsa-miR-4283     |
| EIF4A1 | hsa-miR-4505     |
| EIF4A1 | hsa-miR-3122     |
| EIF4A1 | hsa-miR-145a-3p  |
| EIF4A1 | hsa-miR-4314     |
| EIF4A1 | hsa-miR-3564     |
| EIF4A1 | hsa-miR-7119-5p  |
| EIF4A1 | hsa-miR-449c-5p  |
| EIF4A1 | hsa-miR-8089     |
| EIF4A1 | hsa-miR-23-5p    |
| EIF4A1 | hsa-miR-129-5p   |
| EIF4A1 | hsa-miR-219a-5p  |
| EIF4A1 | hsa-miR-4287     |
| EIF4A1 | hsa-miR-7363-5p  |
| EIF4A1 | hsa-miR-3192-5p  |
| EIF4A1 | hsa-miR-6996-3p  |
| EIF4A1 | hsa-miR-7339-5p  |
| EIF4A1 | hsa-miR-2438     |
| EIF4A1 | hsa-miR-6888-3p  |
| EIF4A1 | hsa-miR-8085     |
| EIF4A1 | hsa-miR-599      |
| EIF4A1 | hsa-miR-599-3p   |
| EIF4A1 | hsa-miR-1663-3p  |
| EIF4A1 | hsa-miR-409b     |
| EIF4A1 | hsa-miR-326-5p   |

|        |                   |
|--------|-------------------|
| EIF4A1 | hsa-miR-8794      |
| EIF4A1 | hsa-miR-6134      |
| EIF4A1 | hsa-miR-4514      |
| EIF4A1 | hsa-miR-4654      |
| EIF4A1 | hsa-miR-7364-5p   |
| EIF4A1 | hsa-miR-7069-5p   |
| EIF4A1 | hsa-miR-2284ac    |
| EIF4A1 | hsa-miR-688       |
| EIF4A1 | hsa-miR-295-5p    |
| EIF4A1 | hsa-miR-4652-5p   |
| EIF4A1 | hsa-miR-7665-5p   |
| EIF4A1 | hsa-miR-942-5p    |
| EIF4A1 | hsa-miR-4255      |
| EIF4A1 | hsa-miR-4430      |
| EIF4A1 | hsa-miR-2114-5p   |
| EIF4A1 | hsa-miR-133a-3p.2 |
| EIF4A1 | hsa-miR-3150b-3p  |
| EIF4A1 | hsa-miR-548c-3p   |
| EIF4A1 | hsa-miR-5197-3p   |
| EIF4A1 | hsa-miR-423-5p    |
| EIF4A1 | hsa-miR-6776-5p   |
| EIF4A1 | hsa-miR-6734-3p   |
| EIF4A1 | hsa-miR-4448      |
| EIF4A1 | hsa-miR-511-5p    |
| EIF4A1 | hsa-miR-6766-5p   |
| EIF4A1 | hsa-miR-493-3p    |
| EIF4A1 | hsa-miR-4756-3p   |
| EIF4A1 | hsa-miR-129b-5p   |
| EIF4A1 | hsa-miR-6868-3p   |
| EIF4A1 | hsa-miR-660-3p    |
| EIF4A1 | hsa-miR-130c-5p   |
| EIF4A1 | hsa-miR-1545c-3p  |
| EIF4A1 | hsa-miR-1805-5p   |
| EIF4A1 | hsa-miR-6398      |
| EIF4A1 | hsa-miR-2394      |
| EIF4A1 | hsa-miR-27-3p     |
| EIF4A1 | hsa-miR-2388-5p   |
| EIF4A1 | hsa-miR-6810-5p   |
| EIF4A1 | hsa-miR-6997-5p   |
| EIF4A1 | hsa-miR-8881      |
| EIF4A1 | hsa-miR-5187-3p   |
| EIF4A1 | hsa-miR-6745      |
| EIF4A1 | hsa-miR-7240-5p   |
| EIF4A1 | hsa-miR-345-3p    |
| EIF4A1 | hsa-miR-4659b-3p  |
| EIF4A1 | hsa-miR-4710      |



|        |                  |
|--------|------------------|
| EIF4A1 | hsa-miR-516a     |
| EIF4A1 | hsa-miR-142-3p   |
| EIF4A1 | hsa-miR-339-5p   |
| EIF4A1 | hsa-miR-624-3p   |
| EIF4A1 | hsa-miR-329a     |
| EIF4A1 | hsa-miR-428      |
| EIF4A1 | hsa-miR-597-3p   |
| EIF4A1 | hsa-miR-6506-5p  |
| EIF4A1 | hsa-miR-361-3p   |
| EIF4A1 | hsa-miR-3140-5p  |
| EIF4A1 | hsa-miR-3586-5p  |
| EIF4A1 | hsa-miR-8843     |
| EIF4A1 | hsa-miR-3591-5p  |
| EIF4A1 | hsa-miR-6873-3p  |
| EIF4A1 | hsa-miR-320-5p   |
| EIF4A1 | hsa-miR-8861     |
| EIF4A1 | hsa-miR-3473be   |
| EIF4A1 | hsa-miR-4774-3p  |
| EIF4A1 | hsa-miR-6877-3p  |
| EIF4A1 | hsa-miR-548c-3p  |
| EIF4A1 | hsa-miR-7388a-5p |
| EIF4A1 | hsa-miR-181-5p   |
| EIF4A1 | hsa-miR-5001-5p  |
| EIF4A1 | hsa-miR-2489     |
| EIF4A1 | hsa-miR-7223-3p  |
| EIF4A1 | hsa-miR-6809-3p  |
| EIF4A1 | hsa-miR-2285c    |
| EIF4A1 | hsa-miR-5101     |
| EIF4A1 | hsa-miR-7264-3p  |
| EIF4A1 | hsa-miR-1233-3p  |
| EIF4A1 | hsa-miR-7298-3p  |
| EIF4A1 | hsa-miR-30c-3p   |
| EIF4A1 | hsa-miR-154b     |
| EIF4A1 | hsa-miR-335-5p   |
| EIF4A1 | hsa-miR-450b-3p  |
| EIF4A1 | hsa-miR-7239-5p  |
| EIF4A1 | hsa-miR-331-3p   |
| EIF4A1 | hsa-miR-343      |
| EIF4A1 | hsa-miR-2355-5p  |
| EIF4A1 | hsa-miR-183-5p   |
| EIF4A1 | hsa-miR-516b-3p  |
| EIF4A1 | hsa-miR-4778-3p  |
| EIF4A1 | hsa-miR-892b     |
| EIF4A1 | hsa-miR-6769a-3p |
| EIF4A1 | hsa-miR-1562-5p  |
| EIF4A1 | hsa-miR-1191b-3p |

|        |                   |
|--------|-------------------|
| EIF4A1 | hsa-miR-7340-5p   |
| EIF4A1 | hsa-miR-3652      |
| EIF4A1 | hsa-miR-3577-5p   |
| EIF4A1 | hsa-miR-6780a-5p  |
| EIF4A1 | hsa-miR-1284      |
| EIF4A1 | hsa-miR-5010-3p   |
| EIF4A1 | hsa-miR-3077-3p   |
| EIF4A1 | hsa-miR-129-5p    |
| EIF4A1 | hsa-miR-380-5p    |
| EIF4A1 | hsa-miR-4731-5p   |
| EIF4A1 | hsa-miR-5189-5p   |
| EIF4A1 | hsa-miR-743-5p    |
| EIF4A1 | hsa-miR-138-1-3p  |
| EIF4A1 | hsa-miR-6860      |
| EIF4A1 | hsa-miR-1584-3p   |
| EIF4A1 | hsa-miR-872-5p    |
| EIF4A1 | hsa-miR-3470a     |
| EIF4A1 | hsa-miR-4690-3p   |
| EIF4A1 | hsa-miR-1200      |
| EIF4A1 | hsa-miR-2285x     |
| EIF4A1 | hsa-miR-5000-3p   |
| EIF4A1 | hsa-miR-196       |
| EIF4A1 | hsa-miR-7315-3p   |
| EIF4A1 | hsa-miR-219b-5p   |
| EIF4A1 | hsa-miR-129b-3p   |
| EIF4A1 | hsa-miR-2385-5p   |
| EIF4A1 | hsa-miR-2355-3p   |
| EIF4A1 | hsa-miR-4768-5p   |
| EIF4A1 | hsa-miR-450a-2-3p |
| EIF4A1 | hsa-miR-6315      |
| EIF4A1 | hsa-miR-488-5p    |
| EIF4A1 | hsa-miR-5088-3p   |
| EIF4A1 | hsa-miR-6787-3p   |
| EIF4A1 | hsa-miR-7318-5p   |
| EIF4A1 | hsa-miR-4640-3p   |
| EIF4A1 | hsa-miR-3573-5p   |
| EIF4A1 | hsa-miR-2300-5p   |
| EIF4A1 | hsa-miR-548au-3p  |
| EIF4A1 | hsa-miR-138-5p    |
| EIF4A1 | hsa-miR-423-3p    |
| EIF4A1 | hsa-miR-6904-5p   |
| EIF4A1 | hsa-miR-4330      |
| EIF4A1 | hsa-miR-5186      |
| EIF4A1 | hsa-miR-670-3p    |
| EIF4A1 | hsa-miR-4469      |
| EIF4A1 | hsa-miR-3078-5p   |

|        |                 |
|--------|-----------------|
| EIF4A1 | hsa-miR-377-3p  |
| EIF4A1 | hsa-miR-7322-5p |
| EIF4A1 | hsa-miR-2113    |
| EIF4A1 | hsa-miR-6941-5p |
| EIF4A1 | hsa-miR-7337-5p |
| EIF4A1 | hsa-miR-7666-5p |
| EIF4A1 | hsa-miR-939-3p  |
| EIF4A1 | hsa-miR-7309-3p |
| EIF4A1 | hsa-miR-193b-3p |
| EIF4A1 | hsa-miR-1544-3p |
| EIF4A1 | hsa-miR-133b    |
| EIF4A1 | hsa-miR-6541    |
| EIF4A1 | hsa-miR-4802-5p |
| EIF4A1 | hsa-miR-872     |
| EIF4A1 | hsa-miR-8084    |
| EIF4A1 | hsa-miR-95-5p   |
| EIF4A1 | hsa-miR-7064-3p |
| EIF4A1 | hsa-miR-3975    |
| EIF4A1 | hsa-miR-6348    |
| EIF4A1 | hsa-miR-374b-3p |
| EIF4A1 | hsa-miR-4688    |
| EIF4A1 | hsa-miR-642a-5p |
| EIF4A1 | hsa-miR-3691-3p |
| EIF4A1 | hsa-miR-6756-5p |
| EIF4A1 | hsa-miR-7320-5p |
| EIF4A1 | hsa-miR-4685-3p |
| EIF4A1 | hsa-miR-3057-5p |
| EIF4A1 | hsa-miR-7007-3p |
| EIF4A1 | hsa-miR-5125-5p |
| EIF4A1 | hsa-miR-7119-3p |
| EIF4A1 | hsa-miR-516a-3p |
| EIF4A1 | hsa-miR-3589    |
| EIF4A1 | hsa-miR-3613-3p |
| EIF4A1 | hsa-miR-30-3p   |
| EIF4A1 | hsa-miR-4278    |
| EIF4A1 | hsa-miR-1286    |
| EIF4A1 | hsa-miR-4769-5p |
| EIF4A1 | hsa-miR-4530    |
| EIF4A1 | hsa-miR-6833-3p |
| EIF4A1 | hsa-miR-6975-3p |
| EIF4A1 | hsa-miR-680     |
| EIF4A1 | hsa-miR-145-3p  |
| EIF4A1 | hsa-miR-3182    |
| EIF4A1 | hsa-miR-6939-3p |
| EIF4A1 | hsa-miR-1248    |
| EIF4A1 | hsa-miR-3152-5p |

|        |                  |
|--------|------------------|
| EIF4A1 | hsa-miR-7851-3p  |
| EIF4A1 | hsa-miR-185-3p   |
| EIF4A1 | hsa-miR-1258-3p  |
| EIF4A1 | hsa-miR-7045-3p  |
| EIF4A1 | hsa-miR-1273h-5p |
| EIF4A1 | hsa-miR-183-3p   |
| EIF4A1 | hsa-miR-454-5p   |
| EIF4A1 | hsa-miR-186-3p   |
| EIF4A1 | hsa-miR-7113-3p  |
| EIF4A1 | hsa-miR-548ah-5p |
| EIF4A1 | hsa-miR-5120     |
| EIF4A1 | hsa-miR-3679-3p  |
| EIF4A1 | hsa-miR-488-3p   |
| EIF4A1 | hsa-miR-7150     |
| EIF4A1 | hsa-miR-3541     |
| EIF4A1 | hsa-miR-642      |
| EIF4A1 | hsa-miR-6851-5p  |
| EIF4A1 | hsa-miR-769-3p   |
| EIF4A1 | hsa-miR-762      |
| EIF4A1 | hsa-miR-30c-2-3p |
| EIF4A1 | hsa-miR-2115-5p  |
| EIF4A1 | hsa-miR-4446-5p  |
| EIF4A1 | hsa-miR-2361     |
| EIF4A1 | hsa-miR-661      |
| EIF4A1 | hsa-miR-23b-5p   |
| EIF4A1 | hsa-miR-7195-5p  |
| EIF4A1 | hsa-miR-1253     |
| EIF4A1 | hsa-miR-6842-3p  |
| EIF4A1 | hsa-miR-7344-5p  |
| EIF4A1 | hsa-miR-548g-3p  |
| EIF4A1 | hsa-miR-548t-5p  |
| EIF4A1 | hsa-miR-3473g    |
| EIF4A1 | hsa-miR-3063-5p  |
| EIF4A1 | hsa-miR-335-5p   |
| EIF4A1 | hsa-miR-7024-5p  |
| EIF4A1 | hsa-miR-4483     |
| EIF4A1 | hsa-miR-7269-5p  |
| EIF4A1 | hsa-miR-6523a    |
| EIF4A1 | hsa-miR-2114-3p  |
| EIF4A1 | hsa-miR-381-3p   |
| EIF4A1 | hsa-miR-28-5p    |
| EIF4A1 | hsa-miR-7038-5p  |
| EIF4A1 | hsa-miR-6810-3p  |
| EIF4A1 | hsa-miR-1897-5p  |
| EIF4A1 | hsa-miR-153-5p   |
| EIF4A1 | hsa-miR-1233-3p  |

|        |                   |
|--------|-------------------|
| EIF4A1 | hsa-miR-340-3p    |
| EIF4A1 | hsa-miR-8908b     |
| EIF4A1 | hsa-miR-7678-3p   |
| EIF4A1 | hsa-miR-1275      |
| EIF4A1 | hsa-miR-2285d     |
| EIF4A1 | hsa-miR-891-3p    |
| EIF4A1 | hsa-miR-4292      |
| EIF4A1 | hsa-let-7-3p      |
| EIF4A1 | hsa-miR-7665-3p   |
| EIF4A1 | hsa-miR-7168-3p   |
| EIF4A1 | hsa-miR-3596d     |
| EIF4A1 | hsa-miR-15b-3p    |
| EIF4A1 | hsa-miR-892-5p    |
| EIF4A1 | hsa-miR-5787      |
| EIF4A1 | hsa-miR-6360      |
| EIF4A1 | hsa-miR-381-3p    |
| EIF4A1 | hsa-miR-2284aa    |
| EIF4A1 | hsa-miR-6740-3p   |
| EIF4A1 | hsa-miR-7352-3p   |
| EIF4A1 | hsa-miR-5118      |
| EIF4A1 | hsa-miR-7391-5p   |
| EIF4A1 | hsa-miR-627-3p    |
| EIF4A1 | hsa-miR-2893      |
| EIF4A1 | hsa-miR-371b-5p   |
| EIF4A1 | hsa-miR-361-5p    |
| EIF4A1 | hsa-miR-133a-3p.1 |
| EIF4A1 | hsa-miR-3689-3p   |
| EIF4A1 | hsa-miR-1237-3p   |
| EIF4A1 | hsa-miR-2422      |
| EIF4A1 | hsa-miR-6772-3p   |
| EIF4A1 | hsa-miR-7234-5p   |
| EIF4A1 | hsa-miR-4268      |
| EIF4A1 | hsa-miR-3670      |
| EIF4A1 | hsa-miR-612       |
| EIF4A1 | hsa-miR-2390      |
| EIF4A1 | hsa-miR-3191-3p   |
| EIF4A1 | hsa-miR-4419b     |
| EIF4A1 | hsa-miR-2183      |
| EIF4A1 | hsa-miR-371       |
| EIF4A1 | hsa-let-7f-1-3p   |
| EIF4A1 | hsa-miR-2428      |
| EIF4A1 | hsa-miR-1240      |
| EIF4A1 | hsa-miR-16-2-3p   |
| EIF4A1 | hsa-miR-6887-3p   |
| EIF4A1 | hsa-miR-539-3p    |
| EIF4A1 | hsa-miR-1843a-5p  |

|        |                  |
|--------|------------------|
| EIF4A1 | hsa-miR-691      |
| EIF4A1 | hsa-miR-7674-5p  |
| EIF4A1 | hsa-miR-3592     |
| EIF4A1 | hsa-miR-7312-3p  |
| EIF4A1 | hsa-miR-31-5p    |
| EIF4A1 | hsa-miR-7325-5p  |
| EIF4A1 | hsa-miR-4765     |
| EIF4A1 | hsa-miR-2368-3p  |
| EIF4A1 | hsa-miR-7023-5p  |
| EIF4A1 | hsa-miR-1892     |
| EIF4A1 | hsa-miR-6379     |
| EIF4A1 | hsa-miR-7249-3p  |
| EIF4A1 | hsa-miR-450b     |
| EIF4A1 | hsa-miR-7192-3p  |
| EIF4A1 | hsa-let-7abf-3p  |
| EIF4A1 | hsa-miR-3909     |
| EIF4A1 | hsa-miR-6916-3p  |
| EIF4A1 | hsa-miR-7197-3p  |
| EIF4A1 | hsa-miR-7201-5p  |
| EIF4A1 | hsa-miR-623      |
| EIF4A1 | hsa-miR-2466-3p  |
| EIF4A1 | hsa-miR-592      |
| EIF4A1 | hsa-miR-5702     |
| EIF4A1 | hsa-miR-1245b-3p |
| EIF4A1 | hsa-miR-8077     |
| EIF4A1 | hsa-miR-6879-3p  |
| EIF4A1 | hsa-miR-8057     |
| EIF4A1 | hsa-miR-34b-5p   |
| EIF4A1 | hsa-miR-2909     |
| EIF4A1 | hsa-miR-8068     |
| EIF4A1 | hsa-miR-3613-5p  |
| EIF4A1 | hsa-miR-216c-3p  |
| EIF4A1 | hsa-miR-712-5p   |
| EIF4A1 | hsa-miR-1246     |
| EIF4A1 | hsa-miR-7861     |
| EIF4A1 | hsa-miR-1285-3p  |
| EIF4A1 | hsa-miR-516b     |
| EIF4A1 | hsa-miR-7283-5p  |
| EIF4A1 | hsa-miR-8870     |
| EIF4A1 | hsa-miR-4667-3p  |
| EIF4A1 | hsa-miR-6743-5p  |
| EIF4A1 | hsa-miR-655-5p   |
| EIF4A1 | hsa-miR-1250-3p  |
| EIF4A1 | hsa-miR-6773-3p  |
| EIF4A1 | hsa-miR-378-5p   |
| EIF4A1 | hsa-miR-4700-5p  |

|        |                 |
|--------|-----------------|
| EIF4A1 | hsa-miR-188-5p  |
| EIF4A1 | hsa-miR-331-3p  |
| EIF4A1 | hsa-miR-4492    |
| EIF4A1 | hsa-miR-4646-5p |
| EIF4A1 | hsa-miR-549-5p  |
| EIF4A1 | hsa-miR-486-3p  |
| EIF4A1 | hsa-miR-449-5p  |
| EIF4A1 | hsa-miR-2451    |
| EIF4A1 | hsa-miR-1782    |
| EIF4A1 | hsa-miR-1958    |
| EIF4A1 | hsa-miR-6801-3p |
| EIF4A1 | hsa-miR-2311    |
| EIF4A1 | hsa-miR-708-5p  |
| EIF4A1 | hsa-miR-3473c   |
| EIF4A1 | hsa-miR-3064-5p |
| EIF4A1 | hsa-miR-742-3p  |
| EIF4A1 | hsa-miR-6878-5p |
| EIF4A1 | hsa-miR-212-3p  |
| EIF4A1 | hsa-miR-4694-3p |
| EIF4A1 | hsa-miR-3083-5p |
| EIF4A1 | hsa-miR-215-3p  |
| EIF4A1 | hsa-miR-7163-5p |
| EIF4A1 | hsa-miR-2285e   |
| EIF4A1 | hsa-miR-1976    |
| EIF4A1 | hsa-miR-6512-5p |
| EIF4A1 | hsa-miR-338-3p  |
| EIF4A1 | hsa-miR-5703    |
| EIF4A1 | hsa-miR-6788-5p |
| EIF4A1 | hsa-miR-1894-5p |
| EIF4A1 | hsa-miR-3655    |
| EIF4A1 | hsa-miR-590-3p  |
| EIF4A1 | hsa-miR-300     |
| EIF4A1 | hsa-miR-6961-3p |
| EIF4A1 | hsa-miR-128-3p  |
| EIF4A1 | hsa-miR-7017-3p |
| EIF4A1 | hsa-miR-638     |
| EIF4A1 | hsa-miR-193b-5p |
| EIF4A1 | hsa-miR-133     |
| EIF4A1 | hsa-miR-7671-5p |
| EIF4A1 | hsa-miR-7350-3p |
| EIF4A1 | hsa-miR-6731-5p |
| EIF4A1 | hsa-miR-4736    |
| EIF4A1 | hsa-miR-8865    |
| EIF4A1 | hsa-miR-187-5p  |
| EIF4A1 | hsa-miR-6807-5p |
| EIF4A1 | hsa-miR-6983-3p |

|        |                  |
|--------|------------------|
| EIF4A1 | hsa-miR-7332-3p  |
| EIF4A1 | hsa-miR-3943     |
| EIF4A1 | hsa-miR-3689d    |
| EIF4A1 | hsa-miR-1230     |
| EIF4A1 | hsa-miR-328      |
| EIF4A1 | hsa-miR-1252-3p  |
| EIF4A1 | hsa-miR-4713-3p  |
| EIF4A1 | hsa-miR-2284r    |
| EIF4A1 | hsa-miR-871-5p   |
| EIF4A1 | hsa-miR-6852-5p  |
| EIF4A1 | hsa-miR-4713-5p  |
| EIF4A1 | hsa-miR-6976-3p  |
| EIF4A1 | hsa-miR-6867-3p  |
| EIF4A1 | hsa-miR-7661-5p  |
| EIF4A1 | hsa-miR-616-5p   |
| EIF4A1 | hsa-miR-3144-5p  |
| EIF4A1 | hsa-miR-34       |
| EIF4A1 | hsa-miR-2328-5p  |
| EIF4A1 | hsa-miR-376a-5p  |
| EIF4A1 | hsa-miR-3062-3p  |
| EIF4A1 | hsa-miR-5107-5p  |
| EIF4A1 | hsa-miR-4692     |
| EIF4A1 | hsa-miR-6780b-3p |
| EIF4A1 | hsa-miR-7679-5p  |
| EIF4A1 | hsa-miR-6980-5p  |
| EIF4A1 | hsa-miR-421-5p   |
| EIF4A1 | hsa-miR-6782-5p  |
| EIF4A1 | hsa-miR-6418-5p  |
| EIF4A1 | hsa-miR-7649-3p  |
| EIF4A1 | hsa-miR-7192-5p  |
| EIF4A1 | hsa-miR-1470     |
| EIF4A1 | hsa-miR-1238-3p  |
| EIF4A1 | hsa-miR-92a-2-5p |
| EIF4A1 | hsa-miR-1547-3p  |
| EIF4A1 | hsa-miR-619-5p   |
| EIF4A1 | hsa-miR-6896-3p  |
| EIF4A1 | hsa-miR-373-3p   |
| EIF4A1 | hsa-miR-1225-3p  |
| EIF4A1 | hsa-miR-7081-3p  |
| EIF4A1 | hsa-miR-2114-5p  |
| EIF4A1 | hsa-miR-619      |
| EIF4A1 | hsa-miR-881-5p   |
| EIF4A1 | hsa-miR-1956-3p  |
| EIF4A1 | hsa-miR-4659a-3p |
| EIF4A1 | hsa-miR-1237-3p  |
| EIF4A1 | hsa-miR-5194     |



|        |                   |
|--------|-------------------|
| EIF4A1 | hsa-miR-1224      |
| EIF4A1 | hsa-miR-545-3p    |
| EIF4A1 | hsa-miR-330-3p    |
| EIF4A1 | hsa-miR-4434      |
| EIF4A1 | hsa-miR-516-3p    |
| EIF4A1 | hsa-miR-154-5p    |
| EIF4A1 | hsa-miR-1226-5p   |
| EIF4A1 | hsa-miR-294       |
| EIF4A1 | hsa-miR-6923-5p   |
| EIF4A1 | hsa-miR-669n      |
| EIF4A1 | hsa-miR-7051-5p   |
| EIF4A1 | hsa-miR-485-5p    |
| EIF4A1 | hsa-miR-2285g     |
| EIF4A1 | hsa-miR-2479      |
| EIF4A1 | hsa-miR-6791-5p   |
| EIF4A1 | hsa-miR-326       |
| EIF4A1 | hsa-miR-1207-5p   |
| EIF4A1 | hsa-miR-2453      |
| EIF4A1 | hsa-miR-607       |
| EIF4A1 | hsa-miR-1207      |
| EIF4A1 | hsa-miR-6824-5p   |
| EIF4A1 | hsa-miR-7222-3p   |
| EIF4A1 | hsa-miR-1293      |
| EIF4A1 | hsa-miR-5002-5p   |
| EIF4A1 | hsa-miR-6734-5p   |
| EIF4A1 | hsa-miR-4478      |
| EIF4A1 | hsa-miR-3074-5p   |
| EIF4A1 | hsa-miR-4516      |
| EIF4A1 | hsa-miR-4743-3p   |
| EIF4A1 | hsa-miR-7236-5p   |
| EIF4A1 | hsa-miR-3596a     |
| EIF4A1 | hsa-miR-6953-5p   |
| EIF4A1 | hsa-miR-2290      |
| EIF4A1 | hsa-miR-877-3p    |
| EIF4A1 | hsa-miR-7260-5p   |
| EIF4A1 | hsa-miR-98-3p     |
| EIF4A1 | hsa-miR-139-3p    |
| EIF4A1 | hsa-miR-125b-2-3p |
| EIF4A1 | hsa-miR-7386d-3p  |
| EIF4A1 | hsa-miR-1903      |
| EIF4A1 | hsa-miR-592-5p    |
| EIF4A1 | hsa-miR-4666a-3p  |
| EIF4A1 | hsa-miR-6546-5p   |
| EIF4A1 | hsa-miR-7359-5p   |
| EIF4A1 | hsa-miR-3929      |
| EIF4A1 | hsa-miR-5685      |

|        |                 |
|--------|-----------------|
| EIF4A1 | hsa-miR-1224-3p |
| EIF4A1 | hsa-miR-7854-3p |
| EIF4A1 | hsa-miR-629-3p  |
| EIF4A1 | hsa-miR-8906    |
| EIF4A1 | hsa-miR-505-5p  |
| EIF4A1 | hsa-miR-2464-5p |
| EIF4A1 | hsa-miR-5584-5p |
| EIF4A1 | hsa-miR-331-5p  |
| EIF4A1 | hsa-miR-30b-3p  |
| EIF4A1 | hsa-miR-133-3p  |
| EIF4A1 | hsa-miR-7106-3p |
| EIF4A1 | hsa-miR-6881-3p |
| EIF4A1 | hsa-miR-4489    |
| EIF4A1 | hsa-miR-6789-5p |
| EIF4A1 | hsa-miR-6914-5p |
| EIF4A1 | hsa-miR-4498    |
| EIF4A1 | hsa-miR-378a-5p |
| EIF4A1 | hsa-miR-28-5p   |
| EIF4A1 | hsa-miR-4780    |
| EIF4A1 | hsa-miR-150-5p  |
| EIF4A1 | hsa-miR-7323-3p |
| EIF4A1 | hsa-miR-545-3p  |
| EIF4A1 | hsa-miR-7207-5p |
| EIF4A1 | hsa-miR-1236-5p |
| EIF4A1 | hsa-miR-338-3p  |
| EIF4A1 | hsa-miR-7162-5p |
| EIF4A1 | hsa-miR-3662    |
| EIF4A1 | hsa-miR-292b-5p |
| EIF4A1 | hsa-miR-1207-3p |
| EIF4A1 | hsa-miR-2284z   |
| EIF4A1 | hsa-miR-1839    |
| EIF4A1 | hsa-miR-7862    |
| EIF4A1 | hsa-miR-1291    |
| EIF4A1 | hsa-miR-6513-5p |
| EIF4A1 | hsa-miR-516     |
| EIF4A1 | hsa-miR-7687-3p |
| EIF4A1 | hsa-miR-7354-3p |
| EIF4A1 | hsa-miR-7233-5p |
| EIF4A1 | hsa-miR-5621-5p |
| EIF4A1 | hsa-miR-625-3p  |
| EIF4A1 | hsa-miR-7152-5p |
| EIF4A1 | hsa-miR-9500    |
| EIF4A1 | hsa-miR-4689    |
| EIF4A1 | hsa-miR-212-5p  |
| EIF4A1 | hsa-miR-4749-3p |
| EIF4A1 | hsa-miR-3913-5p |

|        |                   |
|--------|-------------------|
| EIF4A1 | hsa-miR-3596c     |
| EIF4A1 | hsa-miR-6819-3p   |
| EIF4A1 | hsa-miR-188-5p    |
| EIF4A1 | hsa-miR-7162-3p   |
| EIF4A1 | hsa-miR-3192      |
| EIF4A1 | hsa-miR-5588-3p   |
| EIF4A1 | hsa-miR-7278-3p   |
| EIF4A1 | hsa-miR-6790-3p   |
| EIF4A1 | hsa-miR-5046      |
| EIF4A1 | hsa-miR-8876      |
| EIF4A1 | hsa-miR-3154      |
| EIF4A1 | hsa-miR-670-5p    |
| EIF4A1 | hsa-miR-2444      |
| EIF4A1 | hsa-miR-8848      |
| EIF4A1 | hsa-miR-3187-5p   |
| EIF4A1 | hsa-miR-6858-5p   |
| EIF4A1 | hsa-miR-4667      |
| EIF4A1 | hsa-miR-4729      |
| EIF4A1 | hsa-miR-2296      |
| EIF4A1 | hsa-miR-6834-5p   |
| EIF4A1 | hsa-miR-3674      |
| EIF4A1 | hsa-miR-450a-1-3p |
| EIF4A1 | hsa-miR-8793      |
| EIF4A1 | hsa-miR-483-3p.1  |
| EIF4A1 | hsa-miR-3613a     |
| EIF4A1 | hsa-miR-3609      |
| EIF4A1 | hsa-miR-3188      |
| EIF4A1 | hsa-miR-34b-3p    |
| EIF4A1 | hsa-miR-2345      |
| EIF4A1 | hsa-miR-6954-5p   |
| EIF4A1 | hsa-miR-6765-3p   |
| EIF4A1 | hsa-miR-363-5p    |
| EIF4A1 | hsa-miR-7082-3p   |
| EIF4A1 | hsa-miR-2303      |
| EIF4A1 | hsa-miR-6926-3p   |
| EIF4A1 | hsa-miR-4495      |
| EIF4A1 | hsa-miR-6779-3p   |
| EIF4A1 | hsa-miR-2284s     |
| EIF4A1 | hsa-miR-6822-5p   |
| EIF4A1 | hsa-miR-3059-5p   |
| EIF4A1 | hsa-miR-4667-5p   |
| EIF4A1 | hsa-miR-370       |
| EIF4A1 | hsa-miR-2897      |
| EIF4A1 | hsa-miR-142-3p.2  |
| EIF4A1 | hsa-miR-8823      |
| EIF4A1 | hsa-miR-1225      |

|        |                  |
|--------|------------------|
| EIF4A1 | hsa-miR-7203-5p  |
| EIF4A1 | hsa-miR-1285-3p  |
| EIF4A1 | hsa-miR-5123     |
| EIF4A1 | hsa-miR-10b-5p   |
| EIF4A1 | hsa-miR-7160-5p  |
| EIF4A1 | hsa-miR-763      |
| EIF4A1 | hsa-miR-7177-5p  |
| EIF4A1 | hsa-miR-2467-5p  |
| EIF4A1 | hsa-miR-511      |
| EIF4A1 | hsa-miR-6070     |
| EIF4A1 | hsa-miR-373-5p   |
| EIF4A1 | hsa-miR-6750-5p  |
| EIF4A1 | hsa-miR-7073-5p  |
| EIF4A1 | hsa-miR-298-3p   |
| EIF4A1 | hsa-miR-3162-5p  |
| EIF4A1 | hsa-miR-5093     |
| EIF4A1 | hsa-miR-708-5p   |
| EIF4A1 | hsa-miR-466l-3p  |
| EIF4A1 | hsa-miR-7269-3p  |
| EIF4A1 | hsa-miR-370-3p   |
| EIF4A1 | hsa-miR-6720-3p  |
| EIF4A1 | hsa-miR-6854-5p  |
| EIF4A1 | hsa-let-7b-3p    |
| EIF4E  | hsa-miR-548ap-3p |
| EIF4E  | hsa-miR-2292     |
| EIF4E  | hsa-miR-1912-3p  |
| EIF4E  | hsa-miR-4740-3p  |
| EIF4E  | hsa-miR-7254-3p  |
| EIF4E  | hsa-miR-148      |
| EIF4E  | hsa-miR-25-3p    |
| EIF4E  | hsa-miR-297      |
| EIF4E  | hsa-miR-543-3p   |
| EIF4E  | hsa-miR-465a-5p  |
| EIF4E  | hsa-miR-4752     |
| EIF4E  | hsa-miR-1649-5p  |
| EIF4E  | hsa-miR-302      |
| EIF4E  | hsa-miR-4433a-3p |
| EIF4E  | hsa-let-7c-3p    |
| EIF4E  | hsa-miR-2285l    |
| EIF4E  | hsa-miR-204-3p   |
| EIF4E  | hsa-miR-1587     |
| EIF4E  | hsa-miR-6779-5p  |
| EIF4E  | hsa-miR-4735-5p  |
| EIF4E  | hsa-miR-1954     |
| EIF4E  | hsa-miR-3150b-3p |
| EIF4E  | hsa-miR-5095     |

|       |                  |
|-------|------------------|
| EIF4E | hsa-miR-8054     |
| EIF4E | hsa-miR-6073     |
| EIF4E | hsa-miR-384-3p   |
| EIF4E | hsa-miR-490-3p   |
| EIF4E | hsa-miR-4316     |
| EIF4E | hsa-miR-7194-5p  |
| EIF4E | hsa-miR-132-3p   |
| EIF4E | hsa-miR-409a     |
| EIF4E | hsa-miR-7338-5p  |
| EIF4E | hsa-miR-548ah-3p |
| EIF4E | hsa-miR-3177-5p  |
| EIF4E | hsa-miR-195-3p   |
| EIF4E | hsa-miR-4291     |
| EIF4E | hsa-miR-412      |
| EIF4E | hsa-miR-3140-3p  |
| EIF4E | hsa-miR-660-3p   |
| EIF4E | hsa-miR-6573-5p  |
| EIF4E | hsa-miR-4691-3p  |
| EIF4E | hsa-miR-942-5p   |
| EIF4E | hsa-miR-6314     |
| EIF4E | hsa-miR-7006-5p  |
| EIF4E | hsa-miR-3530-3p  |
| EIF4E | hsa-miR-5684     |
| EIF4E | hsa-miR-7857     |
| EIF4E | hsa-miR-607      |
| EIF4E | hsa-miR-4509     |
| EIF4E | hsa-miR-141-5p   |
| EIF4E | hsa-miR-103b     |
| EIF4E | hsa-miR-532-3p   |
| EIF4E | hsa-miR-548ar-5p |
| EIF4E | hsa-miR-6384     |
| EIF4E | hsa-miR-1960     |
| EIF4E | hsa-miR-605      |
| EIF4E | hsa-miR-6757-5p  |
| EIF4E | hsa-miR-6900-3p  |
| EIF4E | hsa-miR-553      |
| EIF4E | hsa-miR-548g-5p  |
| EIF4E | hsa-miR-7273-5p  |
| EIF4E | hsa-miR-224-3p   |
| EIF4E | hsa-miR-7119-5p  |
| EIF4E | hsa-miR-409      |
| EIF4E | hsa-miR-6740-5p  |
| EIF4E | hsa-miR-1814a    |
| EIF4E | hsa-miR-3122     |
| EIF4E | hsa-miR-525-5p   |
| EIF4E | hsa-miR-548t-3p  |

|       |                  |
|-------|------------------|
| EIF4E | hsa-miR-466b-5p  |
| EIF4E | hsa-miR-8844     |
| EIF4E | hsa-miR-455-5p   |
| EIF4E | hsa-miR-548b-5p  |
| EIF4E | hsa-miR-499a-3p  |
| EIF4E | hsa-miR-6508-3p  |
| EIF4E | hsa-miR-3907     |
| EIF4E | hsa-miR-22-5p    |
| EIF4E | hsa-miR-548c-3p  |
| EIF4E | hsa-miR-410      |
| EIF4E | hsa-miR-502-5p   |
| EIF4E | hsa-miR-4482-3p  |
| EIF4E | hsa-miR-30c-1-3p |
| EIF4E | hsa-miR-6808-5p  |
| EIF4E | hsa-miR-2461-3p  |
| EIF4E | hsa-miR-483-3p   |
| EIF4E | hsa-miR-6861-5p  |
| EIF4E | hsa-miR-6398     |
| EIF4E | hsa-miR-1179     |
| EIF4E | hsa-miR-4650-5p  |
| EIF4E | hsa-miR-4474-5p  |
| EIF4E | hsa-miR-6757-3p  |
| EIF4E | hsa-miR-664      |
| EIF4E | hsa-miR-7027-5p  |
| EIF4E | hsa-miR-7069-5p  |
| EIF4E | hsa-miR-4743-3p  |
| EIF4E | hsa-miR-149-5p   |
| EIF4E | hsa-miR-548az-5p |
| EIF4E | hsa-miR-30b-3p   |
| EIF4E | hsa-miR-6504-3p  |
| EIF4E | hsa-miR-7296-5p  |
| EIF4E | hsa-miR-125-5p   |
| EIF4E | hsa-miR-552-3p   |
| EIF4E | hsa-miR-4790-3p  |
| EIF4E | hsa-miR-4637     |
| EIF4E | hsa-miR-8085     |
| EIF4E | hsa-miR-8089     |
| EIF4E | hsa-miR-7673-3p  |
| EIF4E | hsa-miR-3591-5p  |
| EIF4E | hsa-miR-2482     |
| EIF4E | hsa-let-7c-1-3p  |
| EIF4E | hsa-miR-4767     |
| EIF4E | hsa-miR-6792-3p  |
| EIF4E | hsa-miR-4524b-3p |
| EIF4E | hsa-miR-377-3p   |
| EIF4E | hsa-miR-1288-3p  |

|       |                  |
|-------|------------------|
| EIF4E | hsa-miR-3120-3p  |
| EIF4E | hsa-miR-5683     |
| EIF4E | hsa-miR-8060     |
| EIF4E | hsa-miR-3925-5p  |
| EIF4E | hsa-miR-6090     |
| EIF4E | hsa-miR-6951-3p  |
| EIF4E | hsa-miR-467a-5p  |
| EIF4E | hsa-miR-651      |
| EIF4E | hsa-miR-520-3p   |
| EIF4E | hsa-miR-6830-3p  |
| EIF4E | hsa-miR-4454     |
| EIF4E | hsa-miR-1266     |
| EIF4E | hsa-miR-7116-3p  |
| EIF4E | hsa-miR-7337-5p  |
| EIF4E | hsa-miR-1178-3p  |
| EIF4E | hsa-miR-92       |
| EIF4E | hsa-miR-345-3p   |
| EIF4E | hsa-miR-1304-5p  |
| EIF4E | hsa-miR-6991-5p  |
| EIF4E | hsa-miR-344h-3p  |
| EIF4E | hsa-miR-2376     |
| EIF4E | hsa-miR-8860     |
| EIF4E | hsa-miR-1838     |
| EIF4E | hsa-miR-4672     |
| EIF4E | hsa-miR-193      |
| EIF4E | hsa-miR-8069     |
| EIF4E | hsa-miR-548z     |
| EIF4E | hsa-miR-5696     |
| EIF4E | hsa-miR-6893-5p  |
| EIF4E | hsa-miR-2409     |
| EIF4E | hsa-miR-4284     |
| EIF4E | hsa-miR-25-5p    |
| EIF4E | hsa-miR-103-2-5p |
| EIF4E | hsa-miR-29a-2-5p |
| EIF4E | hsa-miR-2371     |
| EIF4E | hsa-miR-6380     |
| EIF4E | hsa-miR-362-5p   |
| EIF4E | hsa-miR-5697-3p  |
| EIF4E | hsa-miR-302c-5p  |
| EIF4E | hsa-miR-122      |
| EIF4E | hsa-miR-370-5p   |
| EIF4E | hsa-miR-7864     |
| EIF4E | hsa-miR-548ah-5p |
| EIF4E | hsa-miR-4437     |
| EIF4E | hsa-miR-3671     |
| EIF4E | hsa-miR-152-5p   |

|       |                  |
|-------|------------------|
| EIF4E | hsa-miR-2285x    |
| EIF4E | hsa-miR-520g-3p  |
| EIF4E | hsa-miR-378d     |
| EIF4E | hsa-miR-1970     |
| EIF4E | hsa-miR-1228-3p  |
| EIF4E | hsa-miR-2284ac   |
| EIF4E | hsa-miR-624-3p   |
| EIF4E | hsa-miR-5692bc   |
| EIF4E | hsa-miR-548aa    |
| EIF4E | hsa-miR-7161-5p  |
| EIF4E | hsa-miR-133c     |
| EIF4E | hsa-miR-449-3p   |
| EIF4E | hsa-miR-3158-5p  |
| EIF4E | hsa-miR-4314     |
| EIF4E | hsa-miR-7153-3p  |
| EIF4E | hsa-miR-8086     |
| EIF4E | hsa-miR-467f     |
| EIF4E | hsa-miR-103      |
| EIF4E | hsa-miR-6801-3p  |
| EIF4E | hsa-miR-4999-5p  |
| EIF4E | hsa-miR-7369-5p  |
| EIF4E | hsa-miR-6338     |
| EIF4E | hsa-miR-6788-5p  |
| EIF4E | hsa-miR-3910     |
| EIF4E | hsa-miR-6879-5p  |
| EIF4E | hsa-miR-691      |
| EIF4E | hsa-miR-95-5p    |
| EIF4E | hsa-miR-183-5p   |
| EIF4E | hsa-miR-4747-5p  |
| EIF4E | hsa-miR-30       |
| EIF4E | hsa-miR-3192-5p  |
| EIF4E | hsa-miR-1268b    |
| EIF4E | hsa-miR-6896-5p  |
| EIF4E | hsa-miR-218-3p   |
| EIF4E | hsa-miR-30-3p    |
| EIF4E | hsa-miR-1271-3p  |
| EIF4E | hsa-miR-4280     |
| EIF4E | hsa-miR-291      |
| EIF4E | hsa-miR-6777-3p  |
| EIF4E | hsa-miR-3622a-3p |
| EIF4E | hsa-miR-7156-3p  |
| EIF4E | hsa-miR-3121-5p  |
| EIF4E | hsa-miR-8843     |
| EIF4E | hsa-miR-93-5p    |
| EIF4E | hsa-miR-802      |
| EIF4E | hsa-miR-19a-3p   |



|       |                   |
|-------|-------------------|
| EIF4E | hsa-miR-4796-5p   |
| EIF4E | hsa-miR-381-3p    |
| EIF4E | hsa-miR-545-3p    |
| EIF4E | hsa-miR-6499-3p   |
| EIF4E | hsa-miR-627-3p    |
| EIF4E | hsa-miR-4460      |
| EIF4E | hsa-miR-2114-5p   |
| EIF4E | hsa-miR-211-5p    |
| EIF4E | hsa-miR-2438      |
| EIF4E | hsa-miR-8082      |
| EIF4E | hsa-miR-577       |
| EIF4E | hsa-miR-6679-5p   |
| EIF4E | hsa-miR-4446-5p   |
| EIF4E | hsa-miR-5681a     |
| EIF4E | hsa-miR-3692-5p   |
| EIF4E | hsa-miR-4650      |
| EIF4E | hsa-miR-7206-3p   |
| EIF4E | hsa-miR-548s      |
| EIF4E | hsa-miR-7844-5p   |
| EIF4E | hsa-miR-18-5p     |
| EIF4E | hsa-miR-548h-5p   |
| EIF4E | hsa-miR-1227-3p   |
| EIF4E | hsa-miR-448-5p    |
| EIF4E | hsa-miR-7680-3p   |
| EIF4E | hsa-miR-3613-3p   |
| EIF4E | hsa-miR-3614-3p   |
| EIF4E | hsa-miR-6937-3p   |
| EIF4E | hsa-miR-1760      |
| EIF4E | hsa-miR-342-3p    |
| EIF4E | hsa-miR-5701      |
| EIF4E | hsa-miR-1197      |
| EIF4E | hsa-miR-6131      |
| EIF4E | hsa-miR-191-5p    |
| EIF4E | hsa-miR-323a-5p   |
| EIF4E | hsa-miR-212-3p    |
| EIF4E | hsa-miR-5190      |
| EIF4E | hsa-miR-466b-4-3p |
| EIF4E | hsa-miR-873-5p    |
| EIF4E | hsa-miR-4684-3p   |
| EIF4E | hsa-miR-4698      |
| EIF4E | hsa-miR-8861      |
| EIF4E | hsa-miR-7118-5p   |
| EIF4E | hsa-miR-879-5p    |
| EIF4E | hsa-miR-6797-5p   |
| EIF4E | hsa-miR-548aq-3p  |
| EIF4E | hsa-miR-7193-5p   |

|       |                  |
|-------|------------------|
| EIF4E | hsa-miR-548x-3p  |
| EIF4E | hsa-miR-5094     |
| EIF4E | hsa-miR-494      |
| EIF4E | hsa-miR-380-3p   |
| EIF4E | hsa-miR-449-5p   |
| EIF4E | hsa-miR-6319     |
| EIF4E | hsa-miR-2285ad   |
| EIF4E | hsa-miR-3974     |
| EIF4E | hsa-miR-664-3p   |
| EIF4E | hsa-miR-210-5p   |
| EIF4E | hsa-miR-548m     |
| EIF4E | hsa-miR-1933-5p  |
| EIF4E | hsa-miR-2285g    |
| EIF4E | hsa-miR-330-3p.2 |
| EIF4E | hsa-miR-7328-3p  |
| EIF4E | hsa-miR-1911-3p  |
| EIF4E | hsa-miR-219c-3p  |
| EIF4E | hsa-miR-7216-3p  |
| EIF4E | hsa-miR-2285e    |
| EIF4E | hsa-miR-145a-3p  |
| EIF4E | hsa-miR-4455     |
| EIF4E | hsa-miR-6781-5p  |
| EIF4E | hsa-miR-147-5p   |
| EIF4E | hsa-miR-1286     |
| EIF4E | hsa-miR-549a     |
| EIF4E | hsa-miR-613      |
| EIF4E | hsa-miR-4483     |
| EIF4E | hsa-miR-197-3p   |
| EIF4E | hsa-miR-1233-5p  |
| EIF4E | hsa-miR-7211-5p  |
| EIF4E | hsa-miR-527      |
| EIF4E | hsa-miR-320a     |
| EIF4E | hsa-miR-7655-3p  |
| EIF4E | hsa-miR-1240     |
| EIF4E | hsa-miR-3174     |
| EIF4E | hsa-miR-7207-5p  |
| EIF4E | hsa-miR-2440     |
| EIF4E | hsa-miR-3117-5p  |
| EIF4E | hsa-miR-7168-5p  |
| EIF4E | hsa-miR-7183-5p  |
| EIF4E | hsa-miR-1284     |
| EIF4E | hsa-miR-376a-5p  |
| EIF4E | hsa-miR-7386o-3p |
| EIF4E | hsa-miR-198      |
| EIF4E | hsa-miR-2471-3p  |
| EIF4E | hsa-miR-129b-5p  |

|       |                  |
|-------|------------------|
| EIF4E | hsa-miR-3976     |
| EIF4E | hsa-miR-548j-5p  |
| EIF4E | hsa-miR-6748-5p  |
| EIF4E | hsa-miR-4694-5p  |
| EIF4E | hsa-miR-3689a-5p |
| EIF4E | hsa-miR-2285aa   |
| EIF4E | hsa-miR-496.1    |
| EIF4E | hsa-miR-142-3p.1 |
| EIF4E | hsa-miR-1303     |
| EIF4E | hsa-miR-2285j    |
| EIF4E | hsa-miR-6714-3p  |
| EIF4E | hsa-miR-3152-5p  |
| EIF4E | hsa-miR-6639-5p  |
| EIF4E | hsa-miR-4261     |
| EIF4E | hsa-miR-6523a    |
| EIF4E | hsa-miR-660-5p   |
| EIF4E | hsa-miR-7651-5p  |
| EIF4E | hsa-miR-743-5p   |
| EIF4E | hsa-miR-609      |
| EIF4E | hsa-miR-1720-3p  |
| EIF4E | hsa-miR-6778-5p  |
| EIF4E | hsa-miR-4427     |
| EIF4E | hsa-miR-2355-5p  |
| EIF4E | hsa-miR-3524-3p  |
| EIF4E | hsa-miR-290b-5p  |
| EIF4E | hsa-miR-695      |
| EIF4E | hsa-miR-330-3p   |
| EIF4E | hsa-miR-6664-3p  |
| EIF4E | hsa-miR-2957     |
| EIF4E | hsa-miR-5128     |
| EIF4E | hsa-miR-6888-3p  |
| EIF4E | hsa-miR-1178-3p  |
| EIF4E | hsa-miR-5615-5p  |
| EIF4E | hsa-miR-7089-3p  |
| EIF4E | hsa-miR-7117-5p  |
| EIF4E | hsa-miR-7854-3p  |
| EIF4E | hsa-miR-4309     |
| EIF4E | hsa-miR-7398a-3p |
| EIF4E | hsa-miR-7266-3p  |
| EIF4E | hsa-miR-7307-3p  |
| EIF4E | hsa-miR-548c-3p  |
| EIF4E | hsa-miR-570-3p   |
| EIF4E | hsa-miR-6505-3p  |
| EIF4E | hsa-miR-4999-3p  |
| EIF4E | hsa-miR-7292-3p  |
| EIF4E | hsa-miR-2483-3p  |

|       |                   |
|-------|-------------------|
| EIF4E | hsa-miR-593-3p    |
| EIF4E | hsa-miR-4762-3p   |
| EIF4E | hsa-miR-2452      |
| EIF4E | hsa-miR-6742-3p   |
| EIF4E | hsa-miR-550a-3p   |
| EIF4E | hsa-miR-1225-3p   |
| EIF4E | hsa-miR-548ap-5p  |
| EIF4E | hsa-miR-3078-5p   |
| EIF4E | hsa-miR-5590-5p   |
| EIF4E | hsa-miR-548av-5p  |
| EIF4E | hsa-miR-503-3p    |
| EIF4E | hsa-miR-106a-3p   |
| EIF4E | hsa-miR-92a-5p    |
| EIF4E | hsa-miR-374a-3p   |
| EIF4E | hsa-miR-4450      |
| EIF4E | hsa-miR-619-5p    |
| EIF4E | hsa-miR-701-5p    |
| EIF4E | hsa-miR-3120-3p   |
| EIF4E | hsa-miR-548x-5p   |
| EIF4E | hsa-miR-7234-3p   |
| EIF4E | hsa-miR-15c-3p    |
| EIF4E | hsa-miR-599       |
| EIF4E | hsa-miR-1-5p      |
| EIF4E | hsa-miR-7184-5p   |
| EIF4E | hsa-miR-1266-5p   |
| EIF4E | hsa-miR-7664-3p   |
| EIF4E | hsa-miR-7287-5p   |
| EIF4E | hsa-miR-135a-1-3p |
| EIF4E | hsa-miR-4480      |
| EIF4E | hsa-miR-567       |
| EIF4E | hsa-miR-363-3p    |
| EIF4E | hsa-miR-5187-5p   |
| EIF4E | hsa-miR-467-3p    |
| EIF4E | hsa-miR-101-3p.2  |
| EIF4E | hsa-miR-942       |
| EIF4E | hsa-miR-5000-3p   |
| EIF4E | hsa-miR-6753-5p   |
| EIF4E | hsa-miR-489-5p    |
| EIF4E | hsa-miR-3596      |
| EIF4E | hsa-miR-4492      |
| EIF4E | hsa-miR-2428      |
| EIF4E | hsa-miR-7371a-5p  |
| EIF4E | hsa-miR-5693      |
| EIF4E | hsa-miR-7179-3p   |
| EIF4E | hsa-miR-3681-5p   |
| EIF4E | hsa-miR-548av-3p  |

|       |                  |
|-------|------------------|
| EIF4E | hsa-miR-4520-3p  |
| EIF4E | hsa-miR-770      |
| EIF4E | hsa-miR-450b     |
| EIF4E | hsa-miR-677      |
| EIF4E | hsa-miR-4731-5p  |
| EIF4E | hsa-miR-6619-5p  |
| EIF4E | hsa-miR-6840-3p  |
| EIF4E | hsa-miR-7119-3p  |
| EIF4E | hsa-miR-6827-3p  |
| EIF4E | hsa-miR-450b-5p  |
| EIF4E | hsa-miR-16-5p    |
| EIF4E | hsa-miR-5571-5p  |
| EIF4E | hsa-miR-7211-3p  |
| EIF4E | hsa-miR-4742-3p  |
| EIF4E | hsa-miR-3591-3p  |
| EIF4E | hsa-miR-1257     |
| EIF4E | hsa-miR-6722-5p  |
| EIF4E | hsa-miR-3675-3p  |
| EIF4E | hsa-miR-201-5p   |
| EIF4E | hsa-miR-7371j-5p |
| EIF4E | hsa-let-7a-3p    |
| EIF4E | hsa-miR-2324     |
| EIF4E | hsa-miR-6900-5p  |
| EIF4E | hsa-let-7a-2-3p  |
| EIF4E | hsa-miR-548ak    |
| EIF4E | hsa-miR-32-5p    |
| EIF4E | hsa-miR-3074-5p  |
| EIF4E | hsa-miR-16-5p    |
| EIF4E | hsa-miR-3688-5p  |
| EIF4E | hsa-miR-548v     |
| EIF4E | hsa-miR-6529-3p  |
| EIF4E | hsa-miR-670-5p   |
| EIF4E | hsa-miR-1207-5p  |
| EIF4E | hsa-miR-99-3p    |
| EIF4E | hsa-miR-4532     |
| EIF4E | hsa-miR-4799-5p  |
| EIF4E | hsa-miR-410-3p   |
| EIF4E | hsa-miR-5624-5p  |
| EIF4E | hsa-miR-3936     |
| EIF4E | hsa-miR-593-5p   |
| EIF4E | hsa-miR-350      |
| EIF4E | hsa-miR-128-5p   |
| EIF4E | hsa-miR-6735-5p  |
| EIF4E | hsa-miR-2053     |
| EIF4E | hsa-miR-15a-3p   |
| EIF4E | hsa-miR-7053-3p  |

|       |                   |
|-------|-------------------|
| EIF4E | hsa-miR-7169-3p   |
| EIF4E | hsa-miR-5692a     |
| EIF4E | hsa-miR-1976      |
| EIF4E | hsa-miR-1255a     |
| EIF4E | hsa-miR-376b-5p   |
| EIF4E | hsa-miR-6718-5p   |
| EIF4E | hsa-miR-7323-5p   |
| EIF4E | hsa-miR-4528      |
| EIF4E | hsa-miR-3654      |
| EIF4E | hsa-miR-646       |
| EIF4E | hsa-miR-6744-3p   |
| EIF4E | hsa-miR-23        |
| EIF4E | hsa-miR-143-3p    |
| EIF4E | hsa-miR-6832-5p   |
| EIF4E | hsa-miR-351-3p    |
| EIF4E | hsa-miR-666-3p    |
| EIF4E | hsa-miR-548e-5p   |
| EIF4E | hsa-miR-556-3p    |
| EIF4E | hsa-miR-1972      |
| EIF4E | hsa-miR-217       |
| EIF4E | hsa-miR-3573-3p   |
| EIF4E | hsa-miR-450a-3p   |
| EIF4E | hsa-miR-924       |
| EIF4E | hsa-miR-6481      |
| EIF4E | hsa-miR-548h-3p   |
| EIF4E | hsa-miR-466b-2-3p |
| EIF4E | hsa-miR-3658      |
| EIF4E | hsa-miR-743b-3p   |
| EIF4E | hsa-miR-6881-3p   |
| EIF4E | hsa-miR-555       |
| EIF4E | hsa-miR-4715-3p   |
| EIF4E | hsa-miR-7204-3p   |
| EIF4E | hsa-miR-6884-3p   |
| EIF4E | hsa-miR-8075      |
| EIF4E | hsa-miR-4526      |
| EIF4E | hsa-miR-501-3p    |
| EIF4E | hsa-miR-5003-5p   |
| EIF4E | hsa-miR-24-3p     |
| EIF4E | hsa-miR-3059-3p   |
| EIF4E | hsa-miR-5699-3p   |
| EIF4E | hsa-miR-7649-5p   |
| EIF4E | hsa-miR-5589-3p   |
| EIF4E | hsa-miR-2475      |
| EIF4E | hsa-miR-379-5p    |
| EIF4E | hsa-miR-3653-3p   |
| EIF4E | hsa-miR-593-3p    |

|       |                  |
|-------|------------------|
| EIF4E | hsa-miR-21-3p    |
| EIF4E | hsa-miR-874-5p   |
| EIF4E | hsa-miR-455-3p.2 |
| EIF4E | hsa-miR-5002-3p  |
| EIF4E | hsa-miR-6739-3p  |
| EIF4E | hsa-miR-449c-3p  |
| EIF4E | hsa-miR-878      |
| EIF4E | hsa-miR-495-5p   |
| EIF4E | hsa-miR-3591     |
| EIF4E | hsa-miR-1962     |
| EIF4E | hsa-miR-7062-3p  |
| EIF4E | hsa-miR-4478     |
| EIF4E | hsa-miR-6973a-3p |
| EIF4E | hsa-miR-7037-3p  |
| EIF4E | hsa-miR-2351     |
| EIF4E | hsa-miR-138-2-3p |
| EIF4E | hsa-miR-512      |
| EIF4E | hsa-miR-2310     |
| EIF4E | hsa-miR-6906-3p  |
| EIF4E | hsa-miR-770-5p   |
| EIF4E | hsa-miR-508a     |
| EIF4E | hsa-miR-7349-3p  |
| EIF4E | hsa-miR-2410     |
| EIF4E | hsa-miR-23a-5p   |
| EIF4E | hsa-miR-8550     |
| EIF4E | hsa-miR-3616-5p  |
| EIF4E | hsa-miR-371a-5p  |
| EIF4E | hsa-miR-376ab    |
| EIF4E | hsa-miR-1243-3p  |
| EIF4E | hsa-miR-424-5p   |
| EIF4E | hsa-miR-1238-3p  |
| EIF4E | hsa-miR-7198-5p  |
| EIF4E | hsa-miR-30a-3p   |
| EIF4E | hsa-miR-873-3p   |
| EIF4E | hsa-miR-1185-5p  |
| EIF4E | hsa-miR-29a-5p   |
| EIF4E | hsa-miR-345-5p   |
| EIF4E | hsa-miR-4292     |
| EIF4E | hsa-miR-513a-5p  |
| EIF4E | hsa-miR-2297     |
| EIF4E | hsa-miR-487-5p   |
| EIF4E | hsa-miR-3617-5p  |
| EIF4E | hsa-miR-891b     |
| EIF4E | hsa-miR-1537-5p  |
| EIF4E | hsa-miR-5703     |
| EIF4E | hsa-miR-433-5p   |

|       |                   |
|-------|-------------------|
| EIF4E | hsa-miR-3920      |
| EIF4E | hsa-miR-3470b     |
| EIF4E | hsa-miR-6119-3p   |
| EIF4E | hsa-miR-548l      |
| EIF4E | hsa-miR-6736-5p   |
| EIF4E | hsa-miR-2313-5p   |
| EIF4E | hsa-miR-7150      |
| EIF4E | hsa-miR-2370-3p   |
| EIF4E | hsa-miR-5697      |
| EIF4E | hsa-miR-3622a-5p  |
| EIF4E | hsa-miR-2284z     |
| EIF4E | hsa-miR-218-5p    |
| EIF4E | hsa-miR-1273f     |
| EIF4E | hsa-miR-382-3p    |
| EIF4E | hsa-miR-7260-3p   |
| EIF4E | hsa-miR-4670-3p   |
| EIF4E | hsa-miR-208-3p    |
| EIF4E | hsa-miR-8838      |
| EIF4E | hsa-miR-3559-3p   |
| EIF4E | hsa-miR-6509-5p   |
| EIF4E | hsa-miR-669bf-3p  |
| EIF4E | hsa-miR-200c-3p   |
| EIF4E | hsa-miR-429       |
| EIF4E | hsa-miR-103-5p    |
| EIF4E | hsa-miR-1299      |
| EIF4E | hsa-miR-412-3p    |
| EIF4E | hsa-miR-8796      |
| EIF4E | hsa-miR-300-3p    |
| EIF4E | hsa-miR-6823-5p   |
| EIF4E | hsa-miR-134-5p    |
| EIF4E | hsa-miR-145-3p    |
| EIF4E | hsa-miR-130-3p    |
| EIF4E | hsa-miR-502-5p    |
| EIF4E | hsa-miR-2285h     |
| EIF4E | hsa-miR-186-5p    |
| EIF4E | hsa-miR-7053-5p   |
| EIF4E | hsa-miR-550b-2-5p |
| EIF4E | hsa-miR-377-3p    |
| EIF4E | hsa-miR-2902      |
| EIF4E | hsa-miR-876-3p    |
| EIF4E | hsa-miR-196-2-3p  |
| EIF4E | hsa-miR-154c      |
| EIF4E | hsa-miR-331-3p    |
| EIF4E | hsa-miR-2477      |
| EIF4E | hsa-miR-451b      |
| EIF4E | hsa-miR-6509-3p   |



|       |                  |
|-------|------------------|
| EIF4E | hsa-miR-625-5p   |
| EIF4E | hsa-miR-889      |
| EIF4E | hsa-miR-1758     |
| EIF4E | hsa-miR-651-5p   |
| EIF4E | hsa-miR-943      |
| EIF4E | hsa-miR-217-5p   |
| EIF4E | hsa-miR-6936-5p  |
| EIF4E | hsa-miR-6500-5p  |
| EIF4E | hsa-miR-124-3p   |
| EIF4E | hsa-miR-301      |
| EIF4E | hsa-miR-579      |
| EIF4E | hsa-miR-6799-5p  |
| EIF4E | hsa-miR-3190-3p  |
| EIF4E | hsa-miR-6864-3p  |
| EIF4E | hsa-miR-7371d-5p |
| EIF4E | hsa-miR-148b-5p  |
| EIF4E | hsa-miR-1803     |
| EIF4E | hsa-miR-4728-5p  |
| EIF4E | hsa-miR-6815-5p  |
| EIF4E | hsa-miR-6885-3p  |
| EIF4E | hsa-miR-7281-5p  |
| EIF4E | hsa-miR-513a-3p  |
| EIF4E | hsa-miR-10b-3p   |
| EIF4E | hsa-miR-3663-5p  |
| EIF4E | hsa-miR-6732-3p  |
| EIF4E | hsa-miR-33-5p    |
| EIF4E | hsa-miR-1930-3p  |
| EIF4E | hsa-miR-2417     |
| EIF4E | hsa-miR-488-3p   |
| EIF4E | hsa-miR-2285n    |
| EIF4E | hsa-miR-7398r-3p |
| EIF4E | hsa-miR-4419b    |
| EIF4E | hsa-miR-4459     |
| EIF4E | hsa-miR-6849-3p  |
| EIF4E | hsa-miR-3189-3p  |
| EIF4E | hsa-miR-7241-3p  |
| EIF4E | hsa-miR-6842-3p  |
| EIF4E | hsa-miR-3163     |
| EIF4E | hsa-miR-606      |
| EIF4E | hsa-miR-6762-3p  |
| EIF4E | hsa-miR-1258     |
| EIF4E | hsa-miR-1712-3p  |
| EIF4E | hsa-miR-539-3p   |
| EIF4E | hsa-miR-3664-3p  |
| EIF4E | hsa-miR-4666a-3p |
| EIF4E | hsa-miR-152-3p   |

|       |                  |
|-------|------------------|
| EIF4E | hsa-miR-372-5p   |
| EIF4E | hsa-miR-2444     |
| EIF4E | hsa-miR-4663     |
| EIF4E | hsa-miR-7258-5p  |
| EIF4E | hsa-miR-224-5p   |
| EIF4E | hsa-miR-2426     |
| EIF4E | hsa-miR-4753-3p  |
| EIF4E | hsa-miR-7059-3p  |
| EIF4E | hsa-miR-7174-5p  |
| EIF4E | hsa-miR-1285-5p  |
| EIF4E | hsa-miR-544b     |
| EIF4E | hsa-miR-216b-5p  |
| EIF4E | hsa-miR-2479     |
| EIF4E | hsa-miR-1-3p     |
| EIF4E | hsa-miR-6773-3p  |
| EIF4E | hsa-miR-465c-5p  |
| EIF4E | hsa-miR-3202     |
| EIF4E | hsa-miR-187-5p   |
| EIF4E | hsa-miR-490-5p   |
| EIF4E | hsa-miR-3064-3p  |
| EIF4E | hsa-miR-30c-3p   |
| EIF4E | hsa-miR-142-3p   |
| EIF4E | hsa-miR-2284g    |
| EIF4E | hsa-miR-200ac-5p |
| EIF4E | hsa-miR-7024-5p  |
| EIF4E | hsa-miR-135-3p   |
| EIF4E | hsa-miR-2332     |
| EIF4E | hsa-miR-1276     |
| EIF4E | hsa-miR-6890-3p  |
| EIF4E | hsa-miR-342-3p   |
| EIF4E | hsa-miR-6747-3p  |
| EIF4E | hsa-miR-6417     |
| EIF4E | hsa-miR-4716-5p  |
| EIF4E | hsa-miR-7976     |
| EIF4E | hsa-miR-3121-3p  |
| EIF4E | hsa-miR-101a-5p  |
| EIF4E | hsa-miR-141-3p   |
| EIF4E | hsa-miR-124      |
| EIF4E | hsa-miR-297bc-3p |
| EIF4E | hsa-miR-3690     |
| EIF4E | hsa-miR-3058-5p  |
| EIF4E | hsa-miR-6852-5p  |
| EIF4E | hsa-miR-29-5p    |
| EIF4E | hsa-miR-199      |
| EIF4E | hsa-miR-2284y    |
| EIF4E | hsa-miR-5689     |

|       |                  |
|-------|------------------|
| EIF4E | hsa-miR-6683-3p  |
| EIF4E | hsa-miR-1261     |
| EIF4E | hsa-miR-329-3p   |
| EIF4E | hsa-miR-7856-5p  |
| EIF4E | hsa-miR-6553-3p  |
| EIF4E | hsa-miR-182-5p   |
| EIF4E | hsa-miR-1252-3p  |
| EIF4E | hsa-miR-6754-5p  |
| EIF4E | hsa-miR-291b-3p  |
| EIF4E | hsa-miR-669p-3p  |
| EIF4E | hsa-miR-3657     |
| EIF4E | hsa-miR-6594-5p  |
| EIF4E | hsa-miR-6802-5p  |
| EIF4E | hsa-miR-618      |
| EIF4E | hsa-miR-669o-5p  |
| EIF4E | hsa-miR-2314     |
| EIF4E | hsa-miR-526      |
| EIF4E | hsa-miR-4425     |
| EIF4E | hsa-miR-548an    |
| EIF4E | hsa-miR-571      |
| EIF4E | hsa-miR-548au-5p |
| EIF4E | hsa-miR-5003-3p  |
| EIF4E | hsa-miR-7387-3p  |
| EIF4E | hsa-miR-590-5p   |
| EIF4E | hsa-miR-1253     |
| EIF4E | hsa-miR-2359     |
| EIF4E | hsa-miR-548aw    |
| EIF4E | hsa-miR-7468-3p  |
| EIF4E | hsa-miR-3544-3p  |
| EIF4E | hsa-miR-2681-3p  |
| EIF4E | hsa-miR-96-3p    |
| EIF4E | hsa-miR-6903-3p  |
| EIF4E | hsa-miR-7044-3p  |
| EIF4E | hsa-miR-4725-3p  |
| EIF4E | hsa-miR-507      |
| EIF4E | hsa-miR-3663-3p  |
| EIF4E | hsa-miR-3176     |
| EIF4E | hsa-miR-1293     |
| EIF4E | hsa-miR-4667-5p  |
| EIF4E | hsa-miR-466n-3p  |
| EIF4E | hsa-miR-2439-3p  |
| EIF4E | hsa-miR-2414     |
| EIF4E | hsa-miR-1305     |
| EIF4E | hsa-miR-664a-3p  |
| EIF4E | hsa-miR-4744     |
| EIF4E | hsa-miR-4305     |

|       |                      |
|-------|----------------------|
| EIF4E | hsa-miR-7388c-3p     |
| EIF4E | hsa-miR-1277-5p      |
| EIF4E | hsa-miR-589-5p       |
| EIF4E | hsa-miR-4420         |
| EIF4E | hsa-miR-6326         |
| EIF4E | hsa-miR-6526         |
| EIF4E | hsa-miR-29b-2-5p     |
| EIF4E | hsa-miR-7192-3p      |
| EIF4E | hsa-miR-5189-3p      |
| EIF4E | hsa-miR-500a-3p      |
| EIF4E | hsa-miR-29-3p        |
| EIF4E | hsa-miR-3646         |
| EIF4E | hsa-miR-155-5p       |
| EIF4E | hsa-miR-3548         |
| EIF4E | hsa-miR-200c-3p      |
| EIF4E | hsa-miR-874          |
| EIF4E | hsa-miR-7190-5p      |
| EIF4E | hsa-miR-767-5p       |
| EIF4E | hsa-miR-579-3p       |
| EIF4E | hsa-miR-582-5p       |
| EIF4E | hsa-miR-6128         |
| EIF4E | hsa-miR-4797-5p      |
| EIF4E | hsa-miR-7231-3p      |
| EIF4E | hsa-miR-891          |
| EIF4E | hsa-miR-8120         |
| EIF4E | hsa-miR-145-5p       |
| EIF4E | hsa-miR-6736-3p      |
| EIF4E | hsa-miR-7658-3p      |
| EIF4E | hsa-miR-1283         |
| EIF4E | hsa-miR-150-5p       |
| EIF4E | hsa-miR-548b-3p      |
| EIF4E | hsa-miR-6748-3p      |
| EIF4E | hsa-miR-570-3p       |
| EIF4E | hsa-miR-372-3p       |
| EIF4E | hsa-miR-155-3p       |
| EIF4E | hsa-miR-6766-5p      |
| EIF4E | hsa-miR-6704-5p      |
| EIF4E | hsa-miR-2431-5p      |
| EIF4E | hsa-miR-3102-3p.2-3p |
| EIF4E | hsa-miR-2284l        |
| EIF4E | hsa-miR-6929-5p      |
| EIF4E | hsa-miR-6119-5p      |
| EIF4E | hsa-miR-5089-5p      |
| EIF4E | hsa-miR-4714-5p      |
| EIF4E | hsa-miR-4677-5p      |
| EIF4E | hsa-miR-6357         |

|       |                   |
|-------|-------------------|
| EIF4E | hsa-miR-20        |
| EIF4E | hsa-miR-105-5p    |
| EIF4E | hsa-miR-24-3p     |
| EIF4E | hsa-miR-323-3p    |
| EIF4E | hsa-miR-7166-5p   |
| EIF4E | hsa-miR-1941-3p   |
| EIF4E | hsa-miR-4662-5p   |
| EIF4E | hsa-miR-5010-3p   |
| EIF4E | hsa-miR-203a-3p.1 |
| EIF4E | hsa-miR-29b-1-5p  |
| EIF4E | hsa-miR-7654-3p   |
| EIF4E | hsa-miR-4692      |
| EIF4E | hsa-miR-8804      |
| EIF4E | hsa-miR-7385c-3p  |
| EIF4E | hsa-miR-1791-3p   |
| EIF4E | hsa-miR-3188      |
| EIF4E | hsa-miR-6950-3p   |
| EIF4E | hsa-miR-3190-5p   |
| EIF4E | hsa-miR-631       |
| EIF4E | hsa-miR-1559-5p   |
| EIF4E | hsa-miR-291-3p    |
| EIF4E | hsa-miR-548i      |
| EIF4E | hsa-miR-4699-3p   |
| EIF4E | hsa-miR-3153      |
| EIF4E | hsa-miR-3551-5p   |
| EIF4E | hsa-miR-6510-5p   |
| EIF4E | hsa-miR-485-5p    |
| EIF4E | hsa-miR-130       |
| EIF4E | hsa-miR-541-3p    |
| EIF4E | hsa-miR-6079      |
| EIF4E | hsa-miR-588       |
| EIF4E | hsa-miR-883a-5p   |
| EIF4E | hsa-miR-4259      |
| EIF4E | hsa-miR-30c-2-3p  |
| EIF4E | hsa-miR-215       |
| EIF4E | hsa-miR-185-5p    |
| EIF4E | hsa-miR-3138      |
| EIF4E | hsa-miR-202-3p    |
| EIF4E | hsa-miR-7030-5p   |
| EIF4E | hsa-miR-486-5p    |
| EIF4E | hsa-miR-548u      |
| EIF4E | hsa-miR-3942-3p   |
| EIF4E | hsa-miR-8057      |
| EIF4E | hsa-miR-1696      |
| EIF4E | hsa-miR-346       |
| EIF4E | hsa-miR-4643      |

|       |                   |
|-------|-------------------|
| EIF4E | hsa-miR-634       |
| EIF4E | hsa-miR-19-5p     |
| EIF4E | hsa-miR-106-5p    |
| EIF4E | hsa-miR-4684-5p   |
| EIF4E | hsa-miR-7863      |
| EIF4E | hsa-miR-29b-5p    |
| EIF4E | hsa-miR-1243      |
| EIF4E | hsa-miR-126-3p    |
| EIF4E | hsa-miR-3162-3p   |
| EIF4E | hsa-miR-2406      |
| EIF4E | hsa-miR-520f-5p   |
| EIF4E | hsa-miR-587       |
| EIF4E | hsa-miR-6753-3p   |
| EIF4E | hsa-miR-6914-3p   |
| EIF4E | hsa-miR-4272      |
| EIF4E | hsa-miR-693-3p    |
| EIF4E | hsa-miR-504-5p.1  |
| EIF4E | hsa-miR-514a-5p   |
| EIF4E | hsa-miR-5583-5p   |
| EIF4E | hsa-miR-4433b-5p  |
| EIF4E | hsa-miR-128-1-5p  |
| EIF4E | hsa-miR-1324      |
| EIF4E | hsa-miR-7198-3p   |
| EIF4E | hsa-miR-6821-3p   |
| EIF4E | hsa-miR-203-3p    |
| EIF4E | hsa-miR-544a      |
| EIF4E | hsa-miR-4693-3p   |
| EIF4E | hsa-miR-5089-3p   |
| EIF4E | hsa-miR-6385      |
| EIF4E | hsa-miR-1b-5p     |
| EIF4E | hsa-miR-4765      |
| EIF4E | hsa-miR-520       |
| EIF4E | hsa-miR-4659b-5p  |
| EIF4E | hsa-miR-20-3p     |
| EIF4E | hsa-miR-7371e-5p  |
| EIF4E | hsa-miR-6513-3p   |
| EIF4E | hsa-miR-8825      |
| EIF4E | hsa-miR-4656      |
| EIF4E | hsa-miR-4271      |
| EIF4E | hsa-miR-1227-3p   |
| EIF4E | hsa-miR-873a-5p.1 |
| EIF4E | hsa-miR-934       |
| EIF4E | hsa-miR-6511-5p   |
| EIF4E | hsa-miR-434-3p    |
| EIF4E | hsa-miR-2372      |
| EIF4E | hsa-miR-6080      |

|       |                 |
|-------|-----------------|
| EIF4E | hsa-miR-7225-3p |
| EIF4E | hsa-miR-4461    |
| EIF4E | hsa-miR-6516    |
| EIF4E | hsa-miR-292a-3p |
| EIF4E | hsa-miR-3613b   |
| EIF4E | hsa-miR-3968    |
| EIF4E | hsa-miR-7090-3p |
| EIF4E | hsa-miR-765     |
| EIF4E | hsa-miR-4511    |
| EIF4E | hsa-miR-7189-3p |
| EIF4E | hsa-miR-7170-5p |
| EIF4E | hsa-miR-2052    |
| EIF4E | hsa-miR-2131-3p |
| EIF4E | hsa-miR-4518    |
| EIF4E | hsa-miR-525-5p  |
| EIF4E | hsa-miR-8081    |
| EIF4E | hsa-miR-4320    |
| EIF4E | hsa-miR-1227-5p |
| EIF4E | hsa-miR-4257    |
| EIF4E | hsa-miR-1910-5p |
| EIF4E | hsa-miR-3660    |
| EIF4E | hsa-miR-542     |
| EIF4E | hsa-miR-1956    |
| EIF4E | hsa-miR-875     |
| EIF4E | hsa-miR-3137    |
| EIF4E | hsa-miR-3533    |
| EIF4E | hsa-miR-1224    |
| EIF4E | hsa-miR-6603-3p |
| EIF4E | hsa-miR-654-3p  |
| EIF4E | hsa-miR-7468-5p |
| EIF4E | hsa-miR-616-3p  |
| EIF4E | hsa-miR-6787-3p |
| EIF4E | hsa-miR-4793-3p |
| EIF4E | hsa-miR-2363    |
| EIF4E | hsa-miR-141-3p  |
| EIF4E | hsa-miR-3146    |
| EIF4E | hsa-miR-4536-3p |
| EIF4E | hsa-miR-7670-5p |
| EIF4E | hsa-miR-7175-3p |
| EIF4E | hsa-miR-6935-3p |
| EIF4E | hsa-miR-3133    |
| EIF4E | hsa-miR-1827    |
| EIF4E | hsa-miR-7066-3p |
| EIF4E | hsa-miR-2458    |
| EIF4E | hsa-miR-20b-5p  |
| EIF4E | hsa-miR-3915    |

|       |                  |
|-------|------------------|
| EIF4E | hsa-miR-6726-5p  |
| EIF4E | hsa-miR-4311     |
| EIF4E | hsa-miR-4533     |
| EIF4E | hsa-miR-1956-5p  |
| EIF4E | hsa-miR-573      |
| EIF4E | hsa-miR-422      |
| EIF4E | hsa-miR-337-3p   |
| EIF4E | hsa-miR-1271-5p  |
| EIF4E | hsa-miR-3964     |
| EIF4E | hsa-miR-505-3p.2 |
| EIF4E | hsa-miR-7347-5p  |
| EIF4E | hsa-miR-135b-3p  |
| EIF4E | hsa-miR-3668     |
| EIF4E | hsa-miR-7210-3p  |
| EIF4E | hsa-miR-6124     |
| EIF4E | hsa-miR-9406     |
| EIF4E | hsa-miR-7282-5p  |
| EIF4E | hsa-miR-4433a-5p |
| EIF4E | hsa-miR-8816     |
| EIF4E | hsa-miR-6531     |
| EIF4E | hsa-miR-8076     |
| EIF4E | hsa-miR-878-5p   |
| EIF4E | hsa-miR-144-5p   |
| EIF4E | hsa-miR-650abc   |
| EIF4E | hsa-miR-150-5p   |
| EIF4E | hsa-miR-2386     |
| EIF4E | hsa-miR-3167-5p  |
| EIF4E | hsa-miR-548c-5p  |
| EIF4E | hsa-miR-670      |
| EIF4E | hsa-miR-429-3p   |
| EIF4E | hsa-miR-7g-3p    |
| EIF4E | hsa-miR-6811-3p  |
| EIF4E | hsa-miR-181-5p   |
| EIF4E | hsa-miR-129-5p   |
| EIF4E | hsa-miR-488-5p   |
| EIF4E | hsa-let-7ag-3p   |
| EIF4E | hsa-miR-205-5p   |
| EIF4E | hsa-miR-33-3p    |
| EIF4E | hsa-miR-7093-3p  |
| EIF4E | hsa-miR-200bc    |
| EIF4E | hsa-miR-8855     |
| EIF4E | hsa-miR-7327-3p  |
| EIF4E | hsa-miR-5625-3p  |
| EIF4E | hsa-miR-519-5p   |
| EIF4E | hsa-miR-7481-5p  |
| EIF4E | hsa-miR-145-5p   |



|       |                   |
|-------|-------------------|
| EIF4E | hsa-miR-7-3p      |
| EIF4E | hsa-miR-1323-5p   |
| EIF4E | hsa-miR-7334-3p   |
| EIF4E | hsa-miR-7087-3p   |
| EIF4E | hsa-miR-548y      |
| EIF4E | hsa-miR-544a      |
| EIF4E | hsa-miR-20b-3p    |
| EIF4E | hsa-miR-6910-3p   |
| EIF4E | hsa-miR-2290      |
| EIF4E | hsa-miR-2463      |
| EIF4E | hsa-miR-3157-3p   |
| EIF4E | hsa-miR-6838-3p   |
| EIF4E | hsa-miR-7479-5p   |
| EIF4E | hsa-miR-1262-3p   |
| EIF4E | hsa-miR-5124a     |
| EIF4E | hsa-miR-6631-5p   |
| EIF4E | hsa-miR-338-3p    |
| EIF4E | hsa-miR-7111-3p   |
| EIF4E | hsa-miR-875-3p    |
| EIF4E | hsa-miR-2276-3p   |
| EIF4E | hsa-miR-216c-5p   |
| EIF4E | hsa-miR-3585-5p   |
| EIF4E | hsa-miR-8805      |
| EIF4E | hsa-miR-7843-5p   |
| EIF4E | hsa-miR-132-3p    |
| EIF4E | hsa-miR-6804-5p   |
| EIF4E | hsa-miR-5695      |
| EIF4E | hsa-miR-7204-5p   |
| EIF4E | hsa-miR-125a-3p   |
| EIF4E | hsa-miR-138-5p    |
| EIF4E | hsa-miR-4709-3p   |
| EIF4E | hsa-miR-510       |
| EIF4E | hsa-miR-4745-5p   |
| EIF4E | hsa-miR-500b-3p   |
| EIF4E | hsa-miR-6954-3p   |
| EIF4E | hsa-miR-376a-2-5p |
| EIF4E | hsa-miR-8095      |
| EIF4E | hsa-miR-6876-5p   |
| EIF4E | hsa-miR-676-3p    |
| EIF4E | hsa-miR-335-5p    |
| EIF4E | hsa-miR-619       |
| EIF4E | hsa-miR-4669      |
| EIF4E | hsa-miR-3958      |
| EIF4E | hsa-miR-6905-3p   |
| EIF4E | hsa-miR-295-3p    |
| EIF4E | hsa-miR-6870-5p   |

|       |                  |
|-------|------------------|
| EIF4E | hsa-miR-1245a    |
| EIF4E | hsa-miR-7157-3p  |
| EIF4E | hsa-miR-677-5p   |
| EIF4E | hsa-miR-7861     |
| EIF4E | hsa-miR-743ab-3p |
| EIF4E | hsa-miR-888-5p   |
| EIF4E | hsa-miR-369-3p   |
| EIF4E | hsa-miR-195-5p   |
| EIF4E | hsa-miR-7158-5p  |
| EIF4E | hsa-miR-6516-3p  |
| EIF4E | hsa-miR-1559-3p  |
| EIF4E | hsa-let-7abf-3p  |
| EIF4E | hsa-miR-4434     |
| EIF4E | hsa-miR-583      |
| EIF4E | hsa-miR-4323     |
| EIF4E | hsa-miR-148-5p   |
| EIF4E | hsa-miR-6844     |
| EIF4E | hsa-miR-891a-3p  |
| EIF4E | hsa-miR-3616-3p  |
| EIF4E | hsa-miR-3068-3p  |
| EIF4E | hsa-miR-107      |
| EIF4E | hsa-miR-215-5p   |
| EIF4E | hsa-miR-8883     |
| EIF4E | hsa-miR-4703-3p  |
| EIF4E | hsa-miR-4640-5p  |
| EIF4E | hsa-miR-1689-5p  |
| EIF4E | hsa-miR-3093-3p  |
| EIF4E | hsa-miR-320a     |
| EIF4E | hsa-miR-19b-3p   |
| EIF4E | hsa-miR-669ao-3p |
| EIF4E | hsa-miR-599-3p   |
| EIF4E | hsa-miR-5616-3p  |
| EIF4E | hsa-miR-4674     |
| EIF4E | hsa-miR-3100-3p  |
| EIF4E | hsa-miR-7859     |
| EIF4E | hsa-miR-8874     |
| EIF4E | hsa-miR-1643-3p  |
| EIF4E | hsa-miR-3614-5p  |
| EIF4E | hsa-miR-139-3p   |
| EIF4E | hsa-miR-7173-3p  |
| EIF4E | hsa-miR-603      |
| EIF4E | hsa-miR-6782-5p  |
| EIF4E | hsa-miR-5009-5p  |
| EIF4E | hsa-miR-8079     |
| EIF4E | hsa-miR-491-3p   |
| EIF4E | hsa-miR-532-5p   |

|       |                  |
|-------|------------------|
| EIF4E | hsa-miR-203-3p.2 |
| EIF4E | hsa-miR-4723-3p  |
| EIF4E | hsa-miR-8087     |
| EIF4E | hsa-miR-3471     |
| EIF4E | hsa-miR-124-3p.1 |
| EIF4E | hsa-miR-345-5p   |
| EIF4E | hsa-miR-7663-5p  |
| EIF4E | hsa-miR-4279     |
| EIF4E | hsa-miR-548t-5p  |
| EIF4E | hsa-miR-7321-5p  |
| EIF4E | hsa-miR-1288     |
| EIF4E | hsa-miR-6740-3p  |
| EIF4E | hsa-miR-511-5p   |
| EIF4E | hsa-miR-6514-3p  |
| EIF4E | hsa-miR-6399     |
| EIF4E | hsa-miR-431-5p   |
| EIF4E | hsa-miR-2322-3p  |
| EIF4E | hsa-miR-7330-3p  |
| EIF4E | hsa-miR-4778-5p  |
| EIF4E | hsa-miR-136-5p   |
| EIF4E | hsa-miR-330-5p   |
| EIF4E | hsa-miR-548bd-3p |
| EIF4E | hsa-miR-496      |
| EIF4E | hsa-miR-301-3p   |
| EIF4E | hsa-miR-8802     |
| EIF4E | hsa-miR-2285r    |
| EIF4E | hsa-miR-7160-5p  |
| EIF4E | hsa-miR-6984-3p  |
| EIF4E | hsa-miR-6853-3p  |
| EIF4E | hsa-miR-1226-3p  |
| EIF4E | hsa-miR-425      |
| EIF4E | hsa-miR-1207-3p  |
| EIF4E | hsa-miR-4714-3p  |
| EIF4E | hsa-miR-584-3p   |
| EIF4E | hsa-miR-323b-5p  |
| EIF4E | hsa-miR-8808     |
| EIF4E | hsa-miR-323      |
| EIF4E | hsa-miR-4649-3p  |
| EIF4E | hsa-miR-4766-5p  |
| EIF4E | hsa-miR-2285     |
| EIF4E | hsa-miR-592-5p   |
| EIF4E | hsa-miR-4652-3p  |
| EIF4E | hsa-miR-1237-3p  |
| EIF4E | hsa-miR-15b-5p   |
| EIF4E | hsa-miR-2465     |
| EIF4E | hsa-miR-5011-5p  |

|       |                   |
|-------|-------------------|
| EIF4E | hsa-miR-16-3p     |
| EIF4E | hsa-miR-1245-3p   |
| EIF4E | hsa-miR-374-5p    |
| EIF4E | hsa-miR-183-3p    |
| EIF4E | hsa-miR-6981-3p   |
| EIF4E | hsa-miR-1793      |
| EIF4E | hsa-miR-7847-3p   |
| EIF4E | hsa-miR-4727-5p   |
| EIF4E | hsa-miR-133a-5p   |
| EIF4E | hsa-miR-6951-5p   |
| EIF4E | hsa-miR-713       |
| EIF4E | hsa-miR-6696-5p   |
| EIF4E | hsa-miR-7170-3p   |
| EIF4E | hsa-miR-669k-5p   |
| EIF4E | hsa-miR-519d-3p   |
| EIF4E | hsa-miR-5591-3p   |
| EIF4E | hsa-miR-339-5p    |
| EIF4E | hsa-miR-3106-3p   |
| EIF4E | hsa-miR-5589-5p   |
| EIF4E | hsa-miR-6856-3p   |
| EIF4E | hsa-miR-6845-5p   |
| EIF4E | hsa-miR-3198      |
| EIF4E | hsa-miR-1841      |
| EIF4E | hsa-miR-627-5p    |
| EIF4E | hsa-miR-140-3p.2  |
| EIF4E | hsa-miR-4722-5p   |
| EIF4E | hsa-miR-6776-5p   |
| EIF4E | hsa-miR-4711-5p   |
| EIF4E | hsa-miR-7015-5p   |
| EIF4E | hsa-miR-455-3p    |
| EIF4E | hsa-miR-3691-5p   |
| EIF4E | hsa-miR-4436b-5p  |
| EIF4E | hsa-miR-3069-3p   |
| EIF4E | hsa-miR-510-3p    |
| EIF4E | hsa-miR-1456-5p   |
| EIF4E | hsa-miR-367-3p    |
| EIF4E | hsa-miR-7332-5p   |
| EIF4E | hsa-miR-361-5p    |
| EIF4E | hsa-miR-4270      |
| EIF4E | hsa-miR-3577      |
| EIF4E | hsa-miR-508-5p    |
| EIF4E | hsa-miR-7851-3p   |
| EIF4E | hsa-miR-1246      |
| EIF4E | hsa-miR-8058      |
| EIF4E | hsa-miR-181b-1-3p |
| EIF4E | hsa-miR-660-5p    |

|       |                  |
|-------|------------------|
| EIF4E | hsa-miR-208a-3p  |
| EIF4E | hsa-miR-548f-3p  |
| EIF4E | hsa-miR-15b-3p   |
| EIF4E | hsa-miR-4253     |
| EIF4E | hsa-miR-324-3p   |
| EIF4E | hsa-miR-4659a-5p |
| EIF4E | hsa-miR-6976-5p  |
| EIF4E | hsa-miR-10a-3p   |
| EIF4E | hsa-miR-2325     |
| EIF4E | hsa-miR-1463     |
| EIF4E | hsa-miR-6505-5p  |
| EIF4E | hsa-miR-3129-3p  |
| EIF4E | hsa-miR-6510-3p  |
| EIF4E | hsa-miR-205-3p   |
| EIF4E | hsa-miR-7223-5p  |
| EIF4E | hsa-miR-644a     |
| EIF4E | hsa-miR-200a-3p  |
| EIF4E | hsa-miR-1271-5p  |
| EIF4E | hsa-miR-6692-5p  |
| EIF4E | hsa-miR-374a-5p  |
| EIF4E | hsa-miR-4527     |
| EIF4E | hsa-miR-138-5p   |
| EIF4E | hsa-miR-377-5p   |
| EIF4E | hsa-miR-676-3p   |
| EIF4E | hsa-miR-548ao-5p |
| EIF4E | hsa-miR-7218-3p  |
| EIF4E | hsa-miR-8827     |
| EIF4E | hsa-miR-7262b-5p |
| EIF4E | hsa-miR-6791-5p  |
| EIF4E | hsa-miR-7367-5p  |
| EIF4E | hsa-miR-6741-5p  |
| EIF4E | hsa-miR-214-5p   |
| EIF4E | hsa-miR-329      |
| EIF4E | hsa-miR-4732-3p  |
| EIF4E | hsa-miR-4718     |
| EIF4E | hsa-miR-467cd-5p |
| EIF4E | hsa-miR-34       |
| EIF4E | hsa-miR-548j-3p  |
| EIF4E | hsa-miR-140-5p   |
| EIF4E | hsa-miR-1294     |
| EIF4E | hsa-miR-186-5p   |
| EIF4E | hsa-miR-1258-5p  |
| EIF4E | hsa-miR-3057-3p  |
| EIF4E | hsa-miR-622      |
| EIF4E | hsa-miR-4255     |
| EIF4E | hsa-miR-7112-3p  |

|       |                   |
|-------|-------------------|
| EIF4E | hsa-miR-144-3p    |
| EIF4E | hsa-miR-8908-3p   |
| EIF4E | hsa-miR-2285c     |
| EIF4E | hsa-miR-1267      |
| EIF4E | hsa-miR-6872-3p   |
| EIF4E | hsa-miR-133a-3p.2 |
| EIF4E | hsa-miR-548bb-3p  |
| EIF4E | hsa-miR-4720-3p   |
| EIF4E | hsa-miR-654-5p    |
| EIF4E | hsa-miR-8055      |
| EIF4E | hsa-miR-34c-3p    |
| EIF4E | hsa-miR-8893      |
| EIF4E | hsa-miR-675-3p    |
| EIF4E | hsa-miR-3105-5p   |
| EIF4E | hsa-miR-3572-3p   |
| EIF4E | hsa-miR-6731-5p   |
| EIF4E | hsa-miR-4506      |
| EIF4E | hsa-miR-1302      |
| EIF4E | hsa-miR-655       |
| EIF4E | hsa-miR-7166-3p   |
| EIF4E | hsa-miR-6780a-3p  |
| EIF4E | hsa-miR-6630-3p   |
| EIF4E | hsa-miR-3094-3p   |
| EIF4E | hsa-miR-1225-5p   |
| EIF4E | hsa-miR-4266      |
| EIF4E | hsa-miR-7023-5p   |
| EIF4E | hsa-miR-543       |
| EIF4E | hsa-miR-6663-5p   |
| EIF4E | hsa-miR-6730-3p   |
| EIF4E | hsa-miR-7163-3p   |
| EIF4E | hsa-miR-2284ab    |
| EIF4E | hsa-miR-499b-3p   |
| EIF4E | hsa-miR-7336-5p   |
| EIF4E | hsa-miR-7155-5p   |
| EIF4E | hsa-miR-3084-3p   |
| EIF4E | hsa-miR-873b      |
| EIF4E | hsa-miR-483-5p    |
| EIF4E | hsa-miR-3544-5p   |
| EIF4E | hsa-miR-669hk-3p  |
| EIF4E | hsa-miR-3072-5p   |
| EIF4E | hsa-miR-2399-5p   |
| EIF4E | hsa-miR-4302      |
| EIF4E | hsa-miR-32-5p     |
| EIF4E | hsa-miR-5011-3p   |
| EIF4E | hsa-miR-7217-5p   |
| EIF4E | hsa-miR-2462      |

|       |                  |
|-------|------------------|
| EIF4E | hsa-miR-7481-3p  |
| EIF4E | hsa-miR-517      |
| EIF4E | hsa-miR-686      |
| EIF4E | hsa-miR-8856     |
| EIF4E | hsa-miR-1814     |
| EIF4E | hsa-miR-2345     |
| EIF4E | hsa-miR-7251-5p  |
| EIF4E | hsa-miR-543-5p   |
| EIF4E | hsa-miR-7200-3p  |
| EIF4E | hsa-miR-3927-5p  |
| EIF4E | hsa-miR-8869     |
| EIF4E | hsa-miR-5618-5p  |
| EIF4E | hsa-miR-6371     |
| EIF4E | hsa-miR-6499-5p  |
| EIF4E | hsa-miR-7184-3p  |
| EIF4E | hsa-miR-6329     |
| EIF4E | hsa-miR-24-5p    |
| EIF4E | hsa-miR-489      |
| EIF4E | hsa-miR-4700-5p  |
| EIF4E | hsa-miR-547-5p   |
| EIF4E | hsa-miR-1273g-5p |
| EIF4E | hsa-miR-1224-5p  |
| EIF4E | hsa-miR-3530-5p  |
| EIF4E | hsa-miR-6912-5p  |
| EIF4E | hsa-miR-329-5p   |
| EIF4E | hsa-miR-26-5p    |
| EIF4E | hsa-miR-344f-3p  |
| EIF4E | hsa-miR-1260a    |
| EIF4E | hsa-miR-4775     |
| EIF4E | hsa-miR-2390     |
| EIF4E | hsa-miR-1591-3p  |
| EIF4E | hsa-miR-16-2-3p  |
| EIF4E | hsa-miR-1237-3p  |
| EIF4E | hsa-miR-548bb-5p |
| EIF4E | hsa-miR-6506-5p  |
| EIF4E | hsa-miR-7019-5p  |
| EIF4E | hsa-miR-6215     |
| EIF4E | hsa-miR-6895-3p  |
| EIF4E | hsa-miR-186-3p   |
| EIF4E | hsa-miR-124-5p   |
| EIF4E | hsa-miR-7398-3p  |
| EIF4E | hsa-miR-7046-5p  |
| EIF4E | hsa-miR-1454     |
| EIF4E | hsa-miR-548aq-5p |
| EIF4E | hsa-miR-4464     |
| EIF4E | hsa-miR-3134     |

|       |                   |
|-------|-------------------|
| EIF4E | hsa-miR-4796-3p   |
| EIF4E | hsa-miR-433       |
| EIF4E | hsa-miR-4742      |
| EIF4E | hsa-miR-8867      |
| EIF4E | hsa-miR-5193      |
| EIF4E | hsa-miR-4794      |
| EIF4E | hsa-miR-7028-3p   |
| EIF4E | hsa-miR-935       |
| EIF4E | hsa-miR-1297      |
| EIF4E | hsa-miR-7229-3p   |
| EIF4E | hsa-miR-3664-5p   |
| EIF4E | hsa-miR-296-5p    |
| EIF4E | hsa-miR-515-5p    |
| EIF4E | hsa-miR-211-3p    |
| EIF4E | hsa-miR-3618-5p   |
| EIF4E | hsa-miR-4435      |
| EIF4E | hsa-miR-2284q     |
| EIF4E | hsa-miR-4529-5p   |
| EIF4E | hsa-miR-1-2-5p    |
| EIF4E | hsa-miR-4776-3p   |
| EIF4E | hsa-miR-4328      |
| EIF4E | hsa-miR-101-3p.1  |
| EIF4E | hsa-miR-505-3p    |
| EIF4E | hsa-miR-6882-5p   |
| EIF4E | hsa-miR-500a-5p   |
| EIF4E | hsa-miR-101b-3p.1 |
| EIF4E | hsa-miR-548at-5p  |
| EIF4E | hsa-miR-514-3p    |
| EIF4E | hsa-miR-4318      |
| EIF4E | hsa-miR-150-3p    |
| EIF4E | hsa-miR-7284-3p   |
| EIF4E | hsa-miR-548as-3p  |
| EIF4E | hsa-miR-873-5p.1  |
| EIF4E | hsa-miR-204-5p    |
| EIF4E | hsa-miR-4514      |
| EIF4E | hsa-miR-6917-5p   |
| EIF4E | hsa-miR-8810      |
| EIF4E | hsa-miR-21-5p     |
| EIF4E | hsa-miR-2284n     |
| EIF4E | hsa-miR-4421      |
| EIF4E | hsa-miR-6836-3p   |
| EIF4E | hsa-miR-7043-5p   |
| EIF4E | hsa-miR-4795-3p   |
| EIF4E | hsa-miR-218-1-3p  |
| EIF4E | hsa-miR-6730-5p   |
| EIF4E | hsa-miR-516-3p    |



|       |                  |
|-------|------------------|
| EIF4E | hsa-miR-3620-5p  |
| EIF4E | hsa-miR-4274     |
| EIF4E | hsa-miR-138-3p   |
| EIF4E | hsa-miR-3569     |
| EIF4E | hsa-miR-6087     |
| EIF4E | hsa-miR-7212-5p  |
| EIF4E | hsa-miR-4264     |
| EIF4E | hsa-miR-1262-5p  |
| EIF4E | hsa-miR-190a-3p  |
| EIF4E | hsa-miR-653-3p   |
| EIF4E | hsa-miR-7382-5p  |
| EIF4E | hsa-miR-489-3p   |
| EIF4E | hsa-miR-1354     |
| EIF4E | hsa-miR-2285t    |
| EIF4E | hsa-miR-4781-3p  |
| EIF4E | hsa-miR-8068     |
| EIF4E | hsa-miR-376c-5p  |
| EIF4E | hsa-miR-2329-5p  |
| EIF4E | hsa-miR-612      |
| EIF4E | hsa-miR-411-5p.2 |
| EIF4E | hsa-miR-4517     |
| EIF4E | hsa-miR-365-3p   |
| EIF4E | hsa-miR-1577     |
| EIF4E | hsa-miR-892b     |
| EIF4E | hsa-miR-7299-5p  |
| EIF4E | hsa-miR-5098     |
| EIF4E | hsa-miR-6865-5p  |
| EIF4E | hsa-miR-6810-3p  |
| EIF4E | hsa-miR-6554-5p  |
| EIF4E | hsa-miR-98-5p    |
| EIF4E | hsa-miR-6802-3p  |
| EIF4E | hsa-miR-4524-5p  |
| EIF4E | hsa-miR-2113     |
| EIF4E | hsa-miR-6762-5p  |
| EIF4E | hsa-miR-3092-5p  |
| EIF4E | hsa-miR-5700     |
| EIF4E | hsa-miR-766-3p   |
| EIF4E | hsa-miR-32-3p    |
| EIF4E | hsa-miR-4451     |
| EIF4E | hsa-miR-3674     |
| EIF4E | hsa-miR-502a     |
| EIF4E | hsa-miR-294-3p   |
| EIF4E | hsa-miR-7386g-5p |
| EIF4E | hsa-miR-7665-5p  |
| EIF4E | hsa-miR-499      |
| EIF4E | hsa-miR-6715b-5p |

|       |                  |
|-------|------------------|
| EIF4E | hsa-miR-6829-5p  |
| EIF4E | hsa-miR-1285-3p  |
| EIF4E | hsa-miR-6960-3p  |
| EIF4E | hsa-miR-7849-3p  |
| EIF4E | hsa-miR-4761-3p  |
| EIF4E | hsa-miR-3928-3p  |
| EIF4E | hsa-miR-1677-5p  |
| EIF4E | hsa-miR-16-1-3p  |
| EIF4E | hsa-miR-4768-3p  |
| EIF4E | hsa-miR-344b-3p  |
| EIF4E | hsa-miR-513c-5p  |
| EIF4E | hsa-miR-496.2    |
| EIF4E | hsa-miR-7383-3p  |
| EIF4E | hsa-miR-6809-3p  |
| EIF4E | hsa-miR-3071-5p  |
| EIF4E | hsa-miR-4540     |
| EIF4E | hsa-miR-4671-3p  |
| EIF4E | hsa-miR-3911     |
| EIF4E | hsa-miR-212-3p   |
| EIF4E | hsa-miR-6878-3p  |
| EIF4E | hsa-miR-6769b-5p |
| EIF4E | hsa-miR-1182     |
| EIF4E | hsa-miR-208a-5p  |
| EIF4E | hsa-miR-6520     |
| EIF4E | hsa-miR-1592     |
| EIF4E | hsa-miR-4733-5p  |
| EIF4E | hsa-miR-7704     |
| EIF4E | hsa-miR-1273e    |
| EIF4E | hsa-miR-1183     |
| EIF4E | hsa-miR-922      |
| EIF4E | hsa-miR-2284-5p  |
| EIF4E | hsa-miR-8820     |
| EIF4E | hsa-miR-7373b-3p |
| EIF4E | hsa-miR-8875     |
| EIF4E | hsa-miR-4495     |
| EIF4E | hsa-miR-143-5p   |
| EIF4E | hsa-miR-7398s-5p |
| EIF4E | hsa-miR-3121-3p  |
| EIF4E | hsa-miR-101-3p   |
| EIF4E | hsa-miR-8800     |
| EIF4E | hsa-miR-300      |
| EIF4E | hsa-miR-329b     |
| EIF4E | hsa-miR-6071     |
| EIF4E | hsa-miR-8908f    |
| EIF4E | hsa-miR-203b-5p  |
| EIF4E | hsa-miR-181b-3p  |

|       |                  |
|-------|------------------|
| EIF4E | hsa-miR-5690     |
| EIF4E | hsa-miR-506-3p   |
| EIF4E | hsa-miR-197-5p   |
| EIF4E | hsa-miR-1951     |
| EIF4E | hsa-miR-548d-5p  |
| EIF4E | hsa-miR-4651     |
| EIF4E | hsa-miR-548ax    |
| EIF4E | hsa-miR-2278     |
| EIF4E | hsa-miR-2446     |
| EIF4E | hsa-miR-221-5p   |
| EIF4E | hsa-miR-4717-5p  |
| EIF4E | hsa-miR-466      |
| EIF4E | hsa-miR-152      |
| EIF4E | hsa-miR-556-5p   |
| EIF4E | hsa-miR-7071-3p  |
| EIF4E | hsa-miR-760-5p   |
| EIF4E | hsa-miR-6500-3p  |
| EIF4E | hsa-miR-3688-3p  |
| EIF4E | hsa-miR-6797-3p  |
| EIF4E | hsa-miR-148-3p   |
| EIF4E | hsa-miR-34b-3p   |
| EIF4E | hsa-miR-7005-3p  |
| EIF4E | hsa-miR-7386m-3p |
| EIF4E | hsa-miR-892a     |
| EIF4E | hsa-miR-6515-5p  |
| EIF4E | hsa-miR-4269     |
| EIF4E | hsa-miR-7109-3p  |
| EIF4E | hsa-miR-383-5p.2 |
| EIF4E | hsa-miR-6986-3p  |
| EIF4E | hsa-miR-1301-3p  |
| EIF4E | hsa-miR-4729     |
| EIF4E | hsa-miR-7398s-3p |
| EIF4E | hsa-let-7ac-3p   |
| EIF4E | hsa-miR-338-5p   |
| EIF4E | hsa-miR-2970-3p  |
| EIF4E | hsa-miR-596      |
| EIF4E | hsa-miR-362-3p   |
| EIF4E | hsa-miR-4477a    |
| EIF4E | hsa-miR-19       |
| EIF4E | hsa-miR-4286     |
| EIF4E | hsa-miR-6862-5p  |
| EIF4E | hsa-miR-517-3p   |
| EIF4E | hsa-miR-6737-3p  |
| EIF4E | hsa-miR-6829-3p  |
| EIF4E | hsa-miR-6896-3p  |
| EIF4E | hsa-miR-640      |

|       |                    |
|-------|--------------------|
| EIF4E | hsa-miR-6503-5p    |
| EIF4E | hsa-miR-1636       |
| EIF4E | hsa-miR-6975-5p    |
| EIF4E | hsa-miR-6749-3p    |
| EIF4E | hsa-miR-3618-3p    |
| EIF4E | hsa-miR-6701-3p    |
| EIF4E | hsa-miR-4696       |
| EIF4E | hsa-miR-1260a      |
| EIF4E | hsa-miR-3149       |
| EIF4E | hsa-miR-7-5p       |
| EIF4E | hsa-let-7-3p       |
| EIF4E | hsa-miR-221-3p     |
| EIF4E | hsa-miR-4731-3p    |
| EIF4E | hsa-miR-4766-3p    |
| EIF4E | hsa-miR-383-3p     |
| EIF4E | hsa-miR-4441       |
| EIF4E | hsa-miR-375        |
| EIF4E | hsa-miR-1273h-5p   |
| EIF4E | hsa-miR-2286       |
| EIF4E | hsa-miR-425-5p     |
| EIF4E | hsa-miR-8908b      |
| EIF4E | hsa-miR-6879-3p    |
| EIF4E | hsa-miR-7106-5p    |
| EIF4E | hsa-miR-6837-5p    |
| EIF4E | hsa-miR-424-5p     |
| EIF4E | hsa-miR-880-5p     |
| EIF4E | hsa-miR-7049-3p    |
| EIF4E | hsa-miR-6321       |
| EIF4E | hsa-miR-548i-5p    |
| EIF4E | hsa-miR-8797       |
| EIF4E | hsa-miR-1255b-2-3p |
| EIF4E | hsa-miR-509-5p     |
| EIF4E | hsa-miR-7386k-3p   |
| EIF4E | hsa-miR-4736       |
| EIF4E | hsa-miR-8837       |
| EIF4E | hsa-miR-192-3p     |
| EIF4E | hsa-miR-96-5p      |
| EIF4E | hsa-miR-6716-5p    |
| EIF4E | hsa-miR-652-5p     |
| EIF4E | hsa-miR-3586-3p    |
| EIF4E | hsa-miR-5585-3p    |
| EIF4E | hsa-miR-548d-3p    |
| EIF4E | hsa-miR-101-2-5p   |
| EIF4E | hsa-miR-6677-5p    |
| EIF4E | hsa-miR-411-5p.1   |
| EIF4E | hsa-miR-3095-5p    |

|       |                  |
|-------|------------------|
| EIF4E | hsa-miR-644a     |
| EIF4E | hsa-miR-374      |
| EIF4E | hsa-miR-6863     |
| EIF4E | hsa-miR-1558     |
| EIF4E | hsa-miR-222-5p   |
| EIF4E | hsa-miR-595      |
| EIF4E | hsa-miR-107-5p   |
| EIF4E | hsa-miR-7647-5p  |
| EIF4E | hsa-miR-17       |
| EIF4E | hsa-miR-4723-5p  |
| EIF4E | hsa-miR-1910-3p  |
| EIF4E | hsa-miR-23-3p    |
| EIF4E | hsa-miR-4703-5p  |
| EIF4E | hsa-miR-410-5p   |
| EIF4E | hsa-miR-574-3p   |
| EIF4E | hsa-miR-6964-5p  |
| EIF4E | hsa-miR-7479-3p  |
| EIF4E | hsa-miR-7332-3p  |
| EIF4E | hsa-miR-548ae-3p |
| EIF4E | hsa-miR-6950-5p  |
| EIF4E | hsa-miR-9-5p     |
| EIF4E | hsa-miR-669b-5p  |
| EIF4E | hsa-miR-2339     |
| EIF4E | hsa-miR-3978     |
| EIF4E | hsa-let-7f-2-3p  |
| EIF4E | hsa-miR-4256     |
| EIF4E | hsa-miR-582-5p   |
| EIF4E | hsa-miR-4516     |
| EIF4E | hsa-miR-6519     |
| EIF4E | hsa-miR-766-3p   |
| EIF4E | hsa-miR-98-3p    |
| EIF4E | hsa-miR-6089     |
| EIF4E | hsa-miR-6127     |
| EIF4E | hsa-miR-3136-5p  |
| EIF4E | hsa-miR-4755-3p  |
| EIF4E | hsa-miR-374c-5p  |
| EIF4E | hsa-miR-4717-3p  |
| EIF4E | hsa-miR-769-3p   |
| EIF4E | hsa-miR-3587     |
| EIF4E | hsa-miR-4432     |
| EIF4E | hsa-miR-3135b    |
| EIF4E | hsa-miR-296-3p   |
| EIF4E | hsa-miR-3560     |
| EIF4E | hsa-miR-6931-5p  |
| EIF4E | hsa-miR-3136-3p  |
| EIF4E | hsa-miR-3606-3p  |

|       |                   |
|-------|-------------------|
| EIF4E | hsa-miR-1639      |
| EIF4E | hsa-miR-6727-3p   |
| EIF4E | hsa-miR-2461-5p   |
| EIF4E | hsa-miR-466g      |
| EIF4E | hsa-miR-18        |
| EIF4E | hsa-miR-17-3p     |
| EIF4E | hsa-miR-6745      |
| EIF4E | hsa-miR-466l-5p   |
| EIF4E | hsa-miR-6577-3p   |
| EIF4E | hsa-miR-378a-5p   |
| EIF4E | hsa-miR-6129      |
| EIF4E | hsa-miR-3060-5p   |
| EIF4E | hsa-miR-6847-5p   |
| EIF4E | hsa-miR-3148      |
| EIF4E | hsa-miR-1712-5p   |
| EIF4E | hsa-miR-4481      |
| EIF4E | hsa-miR-1224-3p   |
| EIF4E | hsa-miR-7379-3p   |
| EIF4E | hsa-miR-578       |
| EIF4E | hsa-miR-487a      |
| EIF4E | hsa-miR-3194-3p   |
| EIF4E | hsa-miR-1256      |
| EIF4E | hsa-miR-654-5p    |
| EIF4E | hsa-miR-550-5p    |
| EIF4E | hsa-miR-488-3p    |
| EIF4E | hsa-miR-518-3p    |
| EIF4E | hsa-miR-4529-3p   |
| EIF4E | hsa-miR-3583-3p   |
| EIF4E | hsa-miR-890-5p    |
| EIF4E | hsa-miR-4647      |
| EIF4E | hsa-miR-6536      |
| EIF4E | hsa-miR-4774-3p   |
| EIF4E | hsa-miR-31-5p     |
| EIF4E | hsa-miR-577-5p    |
| EIF4E | hsa-miR-105-5p    |
| EIF4E | hsa-miR-2431-3p   |
| EIF4E | hsa-miR-769-5p    |
| EIF4E | hsa-miR-624-3p    |
| EIF4E | hsa-miR-8103      |
| EIF4E | hsa-miR-1805-5p   |
| EIF4E | hsa-miR-5622-5p   |
| EIF4E | hsa-miR-133cd-5p  |
| EIF4E | hsa-miR-374b-3p   |
| EIF4E | hsa-miR-135a-2-3p |
| EIF4E | hsa-miR-4763-3p   |
| EIF4E | hsa-miR-3558-3p   |

|       |                   |
|-------|-------------------|
| EIF4E | hsa-miR-6911-3p   |
| EIF4E | hsa-miR-6715-3p   |
| EIF4E | hsa-miR-506-3p    |
| EIF4E | hsa-miR-511       |
| EIF4E | hsa-miR-628-5p    |
| EIF4E | hsa-miR-7073-5p   |
| EIF4E | hsa-miR-3143      |
| EIF4E | hsa-miR-5093      |
| EIF4E | hsa-miR-3187-3p   |
| EIF4E | hsa-miR-7977      |
| EIF4E | hsa-miR-4646-3p   |
| EIF4E | hsa-miR-34-5p     |
| EIF4E | hsa-miR-27        |
| EIF4E | hsa-miR-324-5p    |
| EIF4E | hsa-miR-558       |
| EIF4E | hsa-miR-7159-5p   |
| EIF4E | hsa-miR-92-3p     |
| EIF4E | hsa-miR-592       |
| EIF4E | hsa-miR-2681-5p   |
| EIF4E | hsa-miR-200c-5p   |
| EIF4E | hsa-miR-4632-5p   |
| EIF4E | hsa-miR-1251-5p   |
| EIF4E | hsa-miR-513       |
| EIF4E | hsa-miR-495-3p    |
| EIF4E | hsa-miR-376e      |
| EIF4E | hsa-miR-10-5p     |
| EIF4E | hsa-miR-7398m-3p  |
| EIF4E | hsa-miR-466c-3p   |
| EIF4E | hsa-miR-22-3p     |
| EIF4E | hsa-miR-4312      |
| EIF4E | hsa-miR-7196-3p   |
| EIF4E | hsa-miR-4666a-5p  |
| EIF4E | hsa-miR-137       |
| EIF4E | hsa-miR-8824      |
| EIF4E | hsa-miR-3526      |
| EIF4E | hsa-miR-3571      |
| EIF4E | hsa-miR-4438      |
| EIF4E | hsa-miR-4520-2-3p |
| EIF4E | hsa-miR-471-3p    |
| EIF4E | hsa-miR-6877-3p   |
| EIF4E | hsa-miR-3692-3p   |
| EIF4E | hsa-miR-153       |
| EIF4E | hsa-miR-4662b     |
| EIF4E | hsa-miR-4307      |
| EIF4E | hsa-miR-196c-3p   |
| EIF4E | hsa-miR-7271-5p   |

|       |                  |
|-------|------------------|
| EIF4E | hsa-miR-3102     |
| EIF4E | hsa-miR-7398e-3p |
| EIF4E | hsa-miR-8908d    |
| EIF4E | hsa-miR-1747-3p  |
| EIF4E | hsa-miR-5707     |
| EIF4E | hsa-miR-920      |
| EIF4E | hsa-miR-302a-3p  |
| EIF4E | hsa-miR-200      |
| EIF4E | hsa-miR-2429     |
| EIF4E | hsa-miR-519d-5p  |
| EIF4E | hsa-miR-331-5p   |
| EIF4E | hsa-miR-4738-3p  |
| EIF4E | hsa-miR-767      |
| EIF4E | hsa-miR-7164-5p  |
| EIF4E | hsa-miR-550      |
| EIF4E | hsa-miR-490-3p   |
| EIF4E | hsa-miR-6768-3p  |
| EIF4E | hsa-miR-219b     |
| EIF4E | hsa-miR-371b-5p  |
| EIF4E | hsa-miR-6825-3p  |
| EIF4E | hsa-miR-2116-5p  |
| EIF4E | hsa-miR-6733-5p  |
| EIF4E | hsa-miR-8881     |
| EIF4E | hsa-miR-2115-3p  |
| EIF4E | hsa-miR-4473     |
| EIF4E | hsa-miR-7667-5p  |
| EIF4E | hsa-miR-3108-5p  |
| EIF4E | hsa-miR-656-5p   |
| EIF4E | hsa-miR-7004-3p  |
| EIF4E | hsa-miR-7457-3p  |
| EIF4E | hsa-miR-139-5p   |
| EIF4E | hsa-miR-1966-5p  |
| EIF4E | hsa-miR-455-3p.1 |
| EIF4E | hsa-miR-7664-5p  |
| EIF4E | hsa-miR-3165     |
| EIF4E | hsa-miR-1778     |
| EIF4E | hsa-miR-221-3p   |
| EIF4E | hsa-miR-7398u-3p |
| EIF4E | hsa-miR-548am-5p |
| EIF4E | hsa-miR-1249-5p  |
| EIF4E | hsa-miR-382-5p   |
| EIF4E | hsa-miR-2385-3p  |
| EIF4E | hsa-miR-741-5p   |
| EIF4E | hsa-miR-15-5p    |
| EIF4E | hsa-miR-4633-5p  |
| EIF4E | hsa-miR-7354-3p  |



|       |                   |
|-------|-------------------|
| EIF4E | hsa-miR-6715b-3p  |
| EIF4E | hsa-miR-1207      |
| EIF4E | hsa-miR-712-5p    |
| EIF4E | hsa-miR-4426      |
| EIF4E | hsa-miR-7116-5p   |
| EIF4E | hsa-miR-153-5p    |
| EIF4E | hsa-miR-1250-3p   |
| EIF4E | hsa-miR-4789-5p   |
| EIF4E | hsa-miR-7691      |
| EIF4E | hsa-miR-6801-5p   |
| EIF4E | hsa-miR-552       |
| EIF4E | hsa-miR-1544-3p   |
| EIF4E | hsa-miR-26b-3p    |
| EIF4E | hsa-miR-7480-5p   |
| EIF4E | hsa-miR-548aj-3p  |
| EIF4E | hsa-miR-3525      |
| EIF4E | hsa-miR-4300      |
| EIF4E | hsa-miR-5186      |
| EIF4E | hsa-miR-568       |
| EIF4E | hsa-miR-466aep-5p |
| EIF4E | hsa-miR-6374      |
| EIF4E | hsa-miR-3922-3p   |
| EIF4E | hsa-miR-4719      |
| EIF4E | hsa-miR-4728-3p   |
| EIF4E | hsa-miR-3672      |
| EIF4E | hsa-miR-3559-5p   |
| EIF4E | hsa-miR-4494      |
| EIF4E | hsa-miR-3099-5p   |
| EIF4E | hsa-miR-6759-3p   |
| EIF4E | hsa-miR-1243-5p   |
| EIF4E | hsa-miR-692       |
| EIF4E | hsa-miR-7398b-3p  |
| EIF4E | hsa-miR-411-3p    |
| EIF4E | hsa-miR-370       |
| EIF4E | hsa-miR-4275      |
| EIF4E | hsa-miR-5100      |
| EIF4E | hsa-miR-3120-5p   |
| EIF4E | hsa-miR-1229-3p   |
| EIF4E | hsa-miR-7312-5p   |
| EIF4E | hsa-miR-7476-5p   |
| EIF4E | hsa-miR-9-3p      |
| EIF4E | hsa-miR-7185-3p   |
| EIF4E | hsa-miR-2392      |
| EIF4E | hsa-miR-4677-3p   |
| EIF4E | hsa-miR-6817-5p   |
| EIF4E | hsa-miR-6878-5p   |

|       |                  |
|-------|------------------|
| EIF4E | hsa-miR-632      |
| EIF4E | hsa-miR-8485     |
| EIF4E | hsa-miR-3686     |
| EIF4E | hsa-miR-5694     |
| EIF4E | hsa-miR-4470     |
| EIF4E | hsa-miR-139-5p   |
| EIF4E | hsa-miR-1304-5p  |
| EIF4E | hsa-miR-7155-3p  |
| EIF4E | hsa-let-7-5p     |
| EIF4E | hsa-miR-196a-3p  |
| EIF4E | hsa-miR-511-3p   |
| EIF4E | hsa-miR-4802-5p  |
| EIF4E | hsa-miR-4695-3p  |
| EIF4E | hsa-miR-1627-3p  |
| EIF4E | hsa-miR-6814-5p  |
| EIF4E | hsa-miR-3941     |
| EIF4E | hsa-miR-190a-5p  |
| EIF4E | hsa-miR-500-5p   |
| EIF4E | hsa-miR-522-3p   |
| EIF4E | hsa-miR-1260b    |
| EIF4E | hsa-miR-6857-5p  |
| EIF4E | hsa-miR-5698     |
| EIF4E | hsa-miR-7257-3p  |
| EIF4E | hsa-miR-7341-3p  |
| EIF4E | hsa-miR-516-5p   |
| EIF4E | hsa-miR-3157-5p  |
| EIF4E | hsa-miR-6769b-3p |
| EIF4E | hsa-miR-548a-3p  |
| EIF4E | hsa-miR-523-3p   |
| EIF4E | hsa-miR-4753-5p  |
| EIF4E | hsa-miR-4325     |
| EIF4E | hsa-miR-3617-3p  |
| EIF4E | hsa-miR-325-3p   |
| EIF4E | hsa-miR-4685-5p  |
| EIF4E | hsa-miR-1288-5p  |
| EIF4E | hsa-miR-497-5p   |
| EIF4E | hsa-miR-889-3p   |
| EIF4E | hsa-miR-8823     |
| EIF4E | hsa-miR-3173-5p  |
| EIF4E | hsa-miR-2301     |
| EIF4E | hsa-miR-871-5p   |
| EIF4E | hsa-miR-140-3p   |
| EIF4E | hsa-miR-1812-5p  |
| EIF4E | hsa-miR-4724-5p  |
| EIF4E | hsa-miR-7176-3p  |
| EIF4E | hsa-miR-2370-5p  |

|       |                  |
|-------|------------------|
| EIF4E | hsa-miR-762      |
| EIF4E | hsa-miR-151-3p   |
| EIF4E | hsa-miR-2311     |
| EIF4E | hsa-miR-2054     |
| EIF4E | hsa-miR-7178-3p  |
| EIF4E | hsa-miR-4298     |
| EIF4E | hsa-miR-7264-5p  |
| EIF4E | hsa-miR-888-5p   |
| EIF4E | hsa-miR-650      |
| EIF4E | hsa-miR-5691     |
| EIF4E | hsa-miR-548az-3p |
| EIF4E | hsa-miR-185-3p   |
| EIF4E | hsa-miR-1255     |
| EIF4E | hsa-miR-495-3p   |
| EIF4E | hsa-miR-4294     |
| EIF4E | hsa-miR-5583-3p  |
| EIF4E | hsa-miR-1279     |
| EIF4E | hsa-miR-5087     |
| EIF4E | hsa-miR-376ab-3p |
| EIF4E | hsa-miR-342-5p   |
| EIF4E | hsa-miR-4254     |
| EIF4E | hsa-miR-181-3p   |
| EIF4E | hsa-miR-3557-5p  |
| EIF4E | hsa-miR-3140-3p  |
| EIF4E | hsa-miR-3105-3p  |
| EIF4E | hsa-miR-10b-5p   |
| EIF4E | hsa-miR-5687     |
| EIF4E | hsa-miR-1255-3p  |
| EIF4E | hsa-miR-3584-5p  |
| EIF4E | hsa-miR-6943-5p  |
| EIF4E | hsa-miR-4289     |
| EIF4E | hsa-miR-326      |
| EIF4E | hsa-miR-301b-5p  |
| EIF4E | hsa-miR-5579-5p  |
| EIF4E | hsa-miR-218-5p   |
| EIF4E | hsa-miR-133      |
| EIF4E | hsa-miR-7307-5p  |
| EIF4E | hsa-miR-31-5p    |
| EIF4E | hsa-miR-8905     |
| EIF4E | hsa-miR-2317     |
| EIF4E | hsa-miR-4777-5p  |
| EIF4E | hsa-miR-493-5p   |
| EIF4E | hsa-miR-3071-3p  |
| EIF4E | hsa-miR-1323     |
| EIF4E | hsa-miR-183-5p   |
| EIF4E | hsa-miR-548am-3p |

|       |                  |
|-------|------------------|
| EIF4E | hsa-miR-513a     |
| EIF4E | hsa-miR-2368-3p  |
| EIF4E | hsa-miR-758-3p   |
| EIF4E | hsa-miR-1388-3p  |
| EIF4E | hsa-miR-4293     |
| EIF4E | hsa-miR-8831     |
| EIF4E | hsa-miR-155-5p   |
| EIF4E | hsa-miR-4433b-3p |
| EIF4E | hsa-miR-350-3p   |
| EIF4E | hsa-miR-4760-5p  |
| EIF4E | hsa-miR-7050-3p  |
| EIF4E | hsa-miR-1247-3p  |
| EIF4E | hsa-miR-6783-5p  |
| EIF4E | hsa-miR-2469     |
| EIF4E | hsa-miR-4777-3p  |
| EIF4E | hsa-miR-3977     |
| EIF4E | hsa-let-7g-3p    |
| EIF4E | hsa-miR-467b-5p  |
| EIF4E | hsa-miR-8848     |
| EIF4E | hsa-miR-3128     |
| EIF4E | hsa-miR-409-3p   |
| EIF4E | hsa-miR-3127-5p  |
| EIF4E | hsa-miR-548f-5p  |
| EIF4E | hsa-miR-4536-5p  |
| EIF4E | hsa-miR-7043-3p  |
| EIF4E | hsa-miR-6715a-3p |
| EIF4E | hsa-miR-376c-3p  |
| EIF4E | hsa-miR-7158-3p  |
| EIF4E | hsa-miR-153-3p   |
| EIF4E | hsa-miR-7000-3p  |
| EIF4E | hsa-miR-1251     |
| EIF4E | hsa-miR-2110     |
| EIF4E | hsa-miR-2421     |
| EIF4E | hsa-miR-1668-3p  |
| EIF4E | hsa-miR-7202-3p  |
| EIF4E | hsa-miR-1208     |
| EIF4E | hsa-miR-500      |
| EIF4E | hsa-miR-3689e    |
| EIF4E | hsa-miR-3191-5p  |
| EIF4E | hsa-miR-7171-5p  |
| EIF4E | hsa-miR-7201-5p  |
| EIF4E | hsa-miR-513b-3p  |
| EIF4E | hsa-miR-4721     |
| EIF4E | hsa-miR-873-5p   |
| EIF4E | hsa-miR-2397-3p  |
| EIF4E | hsa-miR-122-5p   |

|       |                  |
|-------|------------------|
| EIF4E | hsa-miR-4418     |
| EIF4E | hsa-miR-4732-5p  |
| EIF4E | hsa-miR-6834-5p  |
| EIF4E | hsa-miR-659-3p   |
| EIF4E | hsa-miR-147a     |
| EIF4E | hsa-miR-3689b-5p |
| EIF4E | hsa-miR-8806     |
| EIF4E | hsa-miR-1252     |
| EIF4E | hsa-miR-1251-3p  |
| EIF4E | hsa-miR-881-3p   |
| EIF4E | hsa-miR-6790-3p  |
| EIF4E | hsa-miR-551-5p   |
| EIF4E | hsa-miR-195-5p   |
| EIF4E | hsa-miR-503-5p   |
| EIF4E | hsa-miR-7394-3p  |
| EIF4E | hsa-miR-3578     |
| EIF4E | hsa-miR-548w     |
| EIF4E | hsa-miR-6917-3p  |
| EIF4E | hsa-miR-3714     |
| EIF4E | hsa-miR-3155a    |
| EIF4E | hsa-miR-874-3p   |
| EIF4E | hsa-miR-7094-3p  |
| EIF4E | hsa-miR-1282     |
| EIF4E | hsa-miR-6634-5p  |
| EIF4E | hsa-let-7b-3p    |
| EIF4E | hsa-miR-6855-3p  |
| EIF4E | hsa-miR-872-3p   |
| EIF4E | hsa-miR-4423-3p  |
| EIF4E | hsa-miR-890      |
| EIF4E | hsa-miR-3126-5p  |
| EIF4E | hsa-miR-7386e-5p |
| EIF4E | hsa-miR-8898     |
| EIF4E | hsa-miR-576-3p   |
| EIF4E | hsa-miR-591      |
| EIF4E | hsa-miR-7973     |
| EIF4E | hsa-miR-554      |
| EIF4E | hsa-miR-302a-5p  |
| EIF4E | hsa-miR-6890-5p  |
| EIF4E | hsa-miR-693-5p   |
| EIF4E | hsa-miR-3926     |
| EIF4E | hsa-miR-513b-5p  |
| EIF4E | hsa-miR-335-3p   |
| EIF4E | hsa-miR-5000-5p  |
| EIF4E | hsa-miR-431-5p   |
| EIF4E | hsa-miR-608      |
| EIF4E | hsa-miR-539-5p   |

|       |                  |
|-------|------------------|
| EIF4E | hsa-miR-2284b    |
| EIF4E | hsa-miR-4524a-3p |
| EIF4E | hsa-miR-6827-5p  |
| EIF4E | hsa-miR-2284aa   |
| EIF4E | hsa-miR-424-3p   |
| EIF4E | hsa-miR-7281-3p  |
| EIF4E | hsa-miR-93-3p    |
| EIF4E | hsa-miR-7051-3p  |
| EIF4E | hsa-miR-597      |
| EIF4E | hsa-miR-655-3p   |
| EIF4E | hsa-miR-432-3p   |
| EIF4E | hsa-miR-466dk-5p |
| EIF4E | hsa-miR-5007-5p  |
| EIF4E | hsa-miR-518      |
| EIF4E | hsa-miR-6828-3p  |
| EIF4E | hsa-miR-4657     |
| EIF4E | hsa-miR-4690-5p  |
| EIF4E | hsa-miR-5586-3p  |
| EIF4E | hsa-miR-484      |
| EIF4E | hsa-miR-670-3p   |
| EIF4E | hsa-miR-548ac    |
| EIF4E | hsa-miR-514b-5p  |
| EIF4E | hsa-miR-26-3-3p  |
| EIF4E | hsa-miR-6941-5p  |
| EIF4E | hsa-miR-7651-3p  |
| EIF4E | hsa-miR-7191-5p  |
| EIF4E | hsa-miR-559      |
| EIF4E | hsa-miR-6132     |
| EIF4E | hsa-miR-1625-3p  |
| EIF4E | hsa-miR-181c-3p  |
| EIF4E | hsa-miR-7681-3p  |
| EIF4E | hsa-miR-4751     |
| EIF4E | hsa-miR-3682-5p  |
| EIF4E | hsa-miR-2285af   |
| EIF4E | hsa-miR-8084     |
| EIF4E | hsa-miR-224-5p   |
| EIF4E | hsa-miR-548ay-5p |
| EIF4E | hsa-miR-4283     |
| EIF4E | hsa-miR-6744-5p  |
| EIF4E | hsa-miR-371      |
| EIF4E | hsa-miR-4712-3p  |
| EIF4E | hsa-miR-551b-5p  |
| EIF4E | hsa-miR-1264-3p  |
| EIF4E | hsa-let-7d-3p    |
| EIF4E | hsa-miR-183-5p.2 |
| EIF4E | hsa-miR-2285z    |

|       |                   |
|-------|-------------------|
| EIF4E | hsa-miR-4804-3p   |
| EIF4E | hsa-miR-3059-5p   |
| EIF4E | hsa-miR-1968-3p   |
| EIF4E | hsa-miR-514a-3p   |
| EIF4E | hsa-miR-1268a     |
| EIF4E | hsa-miR-26b-5p    |
| EIF4E | hsa-miR-2453      |
| EIF4E | hsa-miR-6804-3p   |
| EIF4E | hsa-miR-4513      |
| EIF4E | hsa-miR-7205-3p   |
| EIF4E | hsa-miR-497-5p    |
| EIF4E | hsa-miR-6754-3p   |
| EIF4E | hsa-miR-2319      |
| EIF4E | hsa-miR-1704      |
| EIF4E | hsa-miR-7390-3p   |
| EIF4E | hsa-miR-4439      |
| EIF4E | hsa-miR-1468-3p   |
| EIF4E | hsa-miR-202-5p    |
| EIF4E | hsa-miR-2284k     |
| EIF4E | hsa-miR-4769-3p   |
| EIF4E | hsa-miR-541-5p    |
| EIF4E | hsa-miR-1238-5p   |
| EIF4E | hsa-miR-586       |
| EIF4E | hsa-miR-6720-5p   |
| EIF4E | hsa-miR-6874-5p   |
| EIF4E | hsa-miR-1248      |
| EIF4E | hsa-miR-2284u     |
| EIF4E | hsa-miR-3064      |
| EIF4E | hsa-miR-7156-5p   |
| EIF4E | hsa-miR-103a-2-5p |
| EIF4E | hsa-miR-887-5p    |
| EIF4E | hsa-miR-193b-5p   |
| EIF4E | hsa-miR-6734-5p   |
| EIF4E | hsa-miR-7075-5p   |
| EIF4E | hsa-miR-193-3p    |
| EIF4E | hsa-miR-6086      |
| EIF4E | hsa-miR-642-3p    |
| EIF4E | hsa-miR-217-3p    |
| EIF4E | hsa-miR-466ade-3p |
| EIF4E | hsa-miR-4476      |
| EIF4E | hsa-miR-1225      |
| EIF4E | hsa-miR-323a-5p   |
| EIF4E | hsa-miR-5096      |
| EIF4E | hsa-miR-4802-3p   |
| EIF4E | hsa-miR-146b-3p   |
| EIF4E | hsa-miR-548as-5p  |

|       |                   |
|-------|-------------------|
| EIF4E | hsa-miR-4693-5p   |
| EIF4E | hsa-miR-485-3p    |
| EIF4E | hsa-miR-25-3p     |
| EIF4E | hsa-miR-1714      |
| EIF4E | hsa-miR-467g      |
| EIF4E | hsa-miR-7666-3p   |
| EIF4E | hsa-miR-616-5p    |
| EIF4E | hsa-miR-610       |
| EIF4E | hsa-miR-6772-3p   |
| EIF4E | hsa-miR-580-5p    |
| EIF4E | hsa-miR-1612      |
| EIF4E | hsa-miR-2284i     |
| EIF4E | hsa-miR-7398l-3p  |
| EIF4E | hsa-miR-6706-5p   |
| EIF4E | hsa-miR-3618      |
| EIF4E | hsa-miR-3607-5p   |
| EIF4E | hsa-miR-101b-3p.2 |
| EIF4E | hsa-miR-7197-3p   |
| EIF4E | hsa-miR-7677-3p   |
| EIF4E | hsa-miR-7850-5p   |
| EIF4E | hsa-miR-501-5p    |
| EIF4E | hsa-miR-128       |
| EIF4E | hsa-miR-136-5p    |
| EIF4E | hsa-miR-372       |
| EIF4E | hsa-miR-6077      |
| EIF4E | hsa-miR-518-5p    |
| EIF4E | hsa-miR-6868-3p   |
| EIF4E | hsa-miR-4430      |
| EIF4E | hsa-miR-6831-3p   |
| EIF4E | hsa-miR-3607-3p   |
| EIF4E | hsa-miR-876       |
| EIF4E | hsa-miR-6776-3p   |
| EIF4E | hsa-miR-520f-3p   |
| EIF4E | hsa-miR-6076      |
| EIF4E | hsa-miR-6790-5p   |
| EIF4E | hsa-miR-6728-5p   |
| EIF4E | hsa-miR-182-3p    |
| EIF4E | hsa-miR-8871      |
| EIF4E | hsa-miR-519-3p    |
| EIF4E | hsa-miR-101a-3p.2 |
| EIF4E | hsa-miR-192-5p    |
| EIF4E | hsa-miR-4675      |
| EIF4E | hsa-miR-5580-3p   |
| EIF4E | hsa-miR-5006-5p   |
| EIF4E | hsa-miR-8841      |
| EIF4E | hsa-miR-335-5p    |



|       |                  |
|-------|------------------|
| EIF4E | hsa-miR-3689-3p  |
| EIF4E | hsa-miR-8080     |
| EIF4E | hsa-miR-381-3p   |
| EIF4E | hsa-miR-939-3p   |
| EIF4E | hsa-miR-1-3p     |
| EIF4E | hsa-miR-655-5p   |
| EIF4E | hsa-miR-376c     |
| EIF4E | hsa-miR-548at-3p |
| EIF4E | hsa-miR-2293     |
| EIF4E | hsa-miR-7111-5p  |
| EIF4E | hsa-miR-548i-3p  |
| EIF4E | hsa-miR-15       |
| EIF4E | hsa-miR-1a-5p    |
| EIF4E | hsa-miR-6898-3p  |
| EIF4E | hsa-miR-33a-3p   |
| EIF4E | hsa-miR-7641     |
| EIF4E | hsa-miR-3577-5p  |
| EIF4E | hsa-miR-193b-3p  |
| EIF4E | hsa-miR-3622b-3p |
| EIF4E | hsa-miR-6134     |
| EIF4E | hsa-miR-299-3p   |
| EIF4E | hsa-miR-7385a-3p |
| EIF4E | hsa-miR-452-3p   |
| EIF4E | hsa-miR-636      |
| EIF4E | hsa-miR-759      |
| EIF4E | hsa-miR-513c-3p  |
| EIF4E | hsa-miR-196b-3p  |
| EIF4E | hsa-miR-6750-5p  |
| EIF4E | hsa-miR-4764-5p  |
| EIF4E | hsa-miR-757      |
| EIF4E | hsa-miR-552-5p   |
| EIF4E | hsa-miR-7351-3p  |
| EIF4E | hsa-miR-8791     |
| EIF4E | hsa-miR-545-3p   |
| EIF4E | hsa-miR-1640     |
| EIF4E | hsa-miR-4679     |
| EIF4E | hsa-miR-6216     |
| EIF4E | hsa-miR-2457     |
| EIF4E | hsa-miR-7a-1-3p  |
| EIF4E | hsa-miR-3665     |
| EIF4E | hsa-miR-576-5p   |
| EIF4E | hsa-miR-522-3p   |
| EIF4E | hsa-miR-532-5p   |
| EIF4E | hsa-miR-7231-5p  |
| EIF4E | hsa-miR-219-1-3p |
| EIF4E | hsa-miR-330-3p   |

|       |                  |
|-------|------------------|
| EIF4E | hsa-miR-3082-5p  |
| EIF4E | hsa-miR-881-5p   |
| EIF4E | hsa-miR-196-3p   |
| EIF4E | hsa-miR-580      |
| EIF4E | hsa-miR-8892     |
| EIF4E | hsa-miR-450b-3p  |
| EIF4E | hsa-miR-1245a    |
| EIF4E | hsa-miR-512-3p   |
| EIF4E | hsa-miR-4803     |
| EIF4E | hsa-miR-1721     |
| EIF4E | hsa-miR-3576     |
| EIF4E | hsa-miR-4668-3p  |
| EIF4E | hsa-miR-892-5p   |
| EIF4E | hsa-miR-3113-5p  |
| EIF4E | hsa-miR-8872     |
| EIF4E | hsa-miR-3934-5p  |
| EIF4E | hsa-miR-15a-5p   |
| EIF4E | hsa-miR-8799     |
| EIF4E | hsa-miR-26       |
| EIF4E | hsa-miR-382-5p   |
| EIF4E | hsa-miR-5571-3p  |
| EIF4E | hsa-miR-2383     |
| EIF4E | hsa-miR-7177-5p  |
| EIF4E | hsa-miR-2447     |
| EIF4E | hsa-miR-370-3p   |
| EIF4E | hsa-miR-760      |
| EIF4E | hsa-miR-146      |
| EIF4E | hsa-miR-218-2-3p |
| EIF4E | hsa-miR-4682     |
| EIF4E | hsa-miR-373-3p   |
| EIF4E | hsa-miR-6999-3p  |
| EIF4E | hsa-miR-708-3p   |
| EIF4E | hsa-miR-4252     |
| EIF4E | hsa-miR-3064-5p  |
| EIF4E | hsa-miR-3160-5p  |
| EIF4E | hsa-miR-520gh    |
| EIF4E | hsa-miR-7386g-3p |
| EIF4E | hsa-miR-216a     |
| EIF4E | hsa-miR-4709-5p  |
| EIF4E | hsa-miR-6826-3p  |
| EIF4E | hsa-miR-4694-3p  |
| EIF4E | hsa-miR-449b-3p  |
| EIF4E | hsa-miR-101-1-5p |
| EIF4E | hsa-miR-2415-3p  |
| EIF4E | hsa-miR-1206     |
| EIF4E | hsa-miR-2393     |

|       |                   |
|-------|-------------------|
| EIF4E | hsa-miR-6906-5p   |
| EIF4E | hsa-miR-4748      |
| EIF4E | hsa-miR-322-5p    |
| EIF4E | hsa-miR-3652      |
| EIF4E | hsa-miR-668       |
| EIF4E | hsa-miR-3180-5p   |
| EIF4E | hsa-miR-2352      |
| EIF4E | hsa-miR-1287-3p   |
| EIF4E | hsa-miR-6780b-5p  |
| EIF4E | hsa-miR-669c-5p   |
| EIF4E | hsa-miR-4658      |
| EIF4E | hsa-miR-3612      |
| EIF4E | hsa-miR-1304-3p   |
| EIF4E | hsa-miR-320-5p    |
| EIF4E | hsa-miR-8065      |
| EIF4E | hsa-miR-6735-3p   |
| EIF4E | hsa-miR-4273      |
| EIF4E | hsa-miR-26a-5p    |
| EIF4E | hsa-miR-7188-3p   |
| EIF4E | hsa-miR-222-3p    |
| EIF4E | hsa-miR-509-3p    |
| EIF4E | hsa-miR-1245b-3p  |
| EIF4E | hsa-miR-374c-3p   |
| EIF4E | hsa-miR-647       |
| EIF4E | hsa-miR-4263      |
| EIF4E | hsa-miR-383-5p    |
| EIF4E | hsa-miR-8801      |
| EIF4E | hsa-miR-367-3p    |
| EIF4E | hsa-miR-1306-5p   |
| EIF4E | hsa-miR-4505      |
| EIF4E | hsa-miR-557       |
| EIF4E | hsa-miR-376abd    |
| EIF4E | hsa-miR-2416      |
| EIF4E | hsa-miR-1434-5p   |
| EIF4E | hsa-miR-669a-3-3p |
| EIF4E | hsa-miR-8873a     |
| EIF4E | hsa-miR-8895      |
| EIF4E | hsa-miR-1550-3p   |
| EIF4E | hsa-miR-1188-3p   |
| EIF4E | hsa-miR-6833-5p   |
| EIF4E | hsa-miR-4778-3p   |
| EIF4E | hsa-miR-1289      |
| EIF4E | hsa-miR-6888-5p   |
| EIF4E | hsa-miR-7168-3p   |
| EIF4E | hsa-miR-34bc-3p   |
| EIF4E | hsa-miR-674-5p    |

|       |                 |
|-------|-----------------|
| EIF4E | hsa-miR-665     |
| EIF4E | hsa-miR-6237    |
| EIF4E | hsa-miR-7646-5p |
| EIF4E | hsa-miR-1200    |
| EIF4E | hsa-miR-2468    |
| EIF4E | hsa-miR-512-5p  |
| EIF4E | hsa-miR-561-3p  |
| EIF4E | hsa-miR-374b-5p |
| EIF4E | hsa-miR-3065-3p |
| EIF4E | hsa-miR-205-5p  |
| EIF4E | hsa-miR-4531    |
| EIF4E | hsa-miR-2400    |
| EIF4E | hsa-miR-3609    |
| EIF4E | hsa-miR-4667    |
| EIF4E | hsa-miR-4786-5p |
| EIF4E | hsa-miR-192-5p  |
| EIF4E | hsa-miR-216a-5p |
| EIF4E | hsa-miR-4704-5p |
| EIF4E | hsa-miR-4708-5p |
| EIF4E | hsa-miR-548b-3p |
| EIF4E | hsa-miR-122-3p  |
| EIF4E | hsa-miR-2418    |
| EIF4E | hsa-miR-20a-3p  |
| EIF4E | hsa-miR-1-1-5p  |
| EIF4E | hsa-miR-4635    |
| EIF4E | hsa-miR-3109-5p |
| EIF4E | hsa-miR-5002-5p |
| EIF4E | hsa-miR-30e     |
| EIF4E | hsa-miR-146-5p  |
| EIF4E | hsa-miR-3170    |
| EIF4E | hsa-miR-548g-3p |
| EIF4E | hsa-miR-7478-3p |
| EIF4E | hsa-miR-2365    |
| EIF4E | hsa-miR-4666b   |
| EIF4E | hsa-miR-133b    |
| EIF4E | hsa-miR-5591-5p |
| EIF4E | hsa-miR-590-3p  |
| EIF4E | hsa-miR-4440    |
| EIF4E | hsa-miR-539-5p  |
| EIF4E | hsa-miR-449a    |
| EIF4E | hsa-miR-7678-3p |
| EIF4E | hsa-miR-7978    |
| EIF4E | hsa-miR-3145-5p |
| EIF4E | hsa-miR-6544-3p |
| EIF4E | hsa-miR-6841-3p |
| EIF4E | hsa-miR-4789-3p |

|       |                   |
|-------|-------------------|
| EIF4E | hsa-miR-373-3p    |
| EIF4E | hsa-miR-138-1-3p  |
| EIF4E | hsa-miR-7647-3p   |
| EIF4E | hsa-miR-6403      |
| EIF4E | hsa-miR-376-3p    |
| EIF4E | hsa-miR-2284j     |
| EIF4E | hsa-miR-518d-5p   |
| EIF4E | hsa-miR-6130      |
| EIF4E | hsa-miR-6822-5p   |
| EIF4E | hsa-miR-31-3p     |
| EIF4E | hsa-miR-6511a-5p  |
| EIF4E | hsa-miR-373-5p    |
| EIF4E | hsa-miR-4317      |
| EIF4E | hsa-miR-6807-5p   |
| EIF4E | hsa-miR-7092-3p   |
| EIF4E | hsa-miR-1255-5p   |
| EIF4E | hsa-miR-4772-5p   |
| EIF4E | hsa-miR-3062-5p   |
| EIF4E | hsa-miR-7207-3p   |
| EIF4E | hsa-miR-5196-5p   |
| EIF4E | hsa-miR-2455      |
| EIF4E | hsa-miR-6739-5p   |
| EIF4E | hsa-miR-4662a-3p  |
| EIF4E | hsa-miR-2291      |
| EIF4E | hsa-miR-509-3p    |
| EIF4E | hsa-miR-4800-3p   |
| EIF4E | hsa-miR-9768-3p   |
| EIF4E | hsa-miR-548aef    |
| EIF4E | hsa-miR-6729-3p   |
| EIF4E | hsa-miR-4428      |
| EIF4E | hsa-miR-4742-5p   |
| EIF4E | hsa-miR-148a-5p   |
| EIF4E | hsa-miR-7386j-3p  |
| EIF4E | hsa-miR-7107-3p   |
| EIF4E | hsa-miR-219a-1-3p |
| EIF4E | hsa-miR-3101-3p   |
| EIF4E | hsa-miR-548aj-5p  |
| EIF4E | hsa-miR-6778-3p   |
| EIF4E | hsa-miR-4448      |
| EIF4E | hsa-miR-1781-3p   |
| EIF4E | hsa-miR-6728-3p   |
| EIF4E | hsa-miR-365b-5p   |
| EIF4E | hsa-miR-548e-3p   |
| EIF4E | hsa-miR-2485      |
| EIF4E | hsa-miR-500b-5p   |
| EIF4E | hsa-miR-7005-5p   |

|       |                  |
|-------|------------------|
| EIF4E | hsa-miR-34c-5p   |
| EIF4E | hsa-miR-3529-3p  |
| EIF4E | hsa-miR-1540-5p  |
| EIF4E | hsa-miR-589-5p   |
| EIF4E | hsa-miR-7163-5p  |
| EIF4E | hsa-miR-4484     |
| EIF4E | hsa-miR-7-5p     |
| EIF4E | hsa-miR-4536-5p  |
| EIF4E | hsa-miR-7394a-5p |
| EIF4E | hsa-miR-5582-3p  |
| EIF4E | hsa-miR-2284m    |
| EIF4E | hsa-miR-1283a    |
| EIF4E | hsa-miR-668-3p   |
| EIF4E | hsa-miR-383      |
| EIF4E | hsa-miR-6764-3p  |
| EIF4E | hsa-miR-6848-3p  |
| EIF4E | hsa-miR-6791-3p  |
| EIF4E | hsa-miR-3185     |
| EIF4E | hsa-miR-2361     |
| EIF4E | hsa-miR-6937-5p  |
| EIF4E | hsa-miR-6834-3p  |
| EIF4E | hsa-miR-199-3p   |
| EIF4E | hsa-miR-548n     |
| EIF4E | hsa-miR-140-5p   |
| EIF4E | hsa-miR-519      |
| EIF4E | hsa-miR-3651     |
| EIF4E | hsa-miR-103-3p   |
| EIF4E | hsa-miR-1273g-3p |
| EIF4E | hsa-miR-4757-5p  |
| EIF4E | hsa-miR-1969     |
| EIF4E | hsa-miR-6344     |
| EIF4E | hsa-miR-301a-5p  |
| EIF4E | hsa-miR-499b-5p  |
| EIF4E | hsa-miR-6972-3p  |
| EIF4E | hsa-miR-219-3p   |
| EIF4E | hsa-miR-6966-3p  |
| EIF4E | hsa-miR-6756-5p  |
| EIF4E | hsa-miR-669h-5p  |
| EIF4E | hsa-miR-8077     |
| EIF4E | hsa-miR-4798-3p  |
| EIF4E | hsa-miR-6793-3p  |
| EIF4E | hsa-miR-1285-3p  |
| EIF4E | hsa-miR-548a-5p  |
| EIF4E | hsa-miR-944      |
| EIF4E | hsa-miR-3065-5p  |
| EIF4E | hsa-miR-548      |

|       |                  |
|-------|------------------|
| EIF4E | hsa-miR-4701-3p  |
| EIF4E | hsa-miR-6409     |
| EIF4E | hsa-miR-149-5p   |
| EIF4E | hsa-miR-1262     |
| EIF4E | hsa-miR-7036b-3p |
| EIF4E | hsa-miR-1323-3p  |
| EIF4E | hsa-miR-934-5p   |
| EIF4E | hsa-miR-1255b-5p |
| EIF4E | hsa-miR-190-5p   |
| EIF4E | hsa-miR-7372-3p  |
| EIF4E | hsa-miR-6355     |
| EIF4E | hsa-miR-331-3p   |
| EIF4E | hsa-miR-3095-3p  |
| EIF4E | hsa-miR-101-3p   |
| EIF4E | hsa-miR-1789     |
| EIF4E | hsa-miR-5195-5p  |
| EIF4E | hsa-miR-8066     |
| EIF4E | hsa-miR-4534     |
| EIF4E | hsa-miR-6719-3p  |
| EIF4E | hsa-miR-548ar-3p |
| EIF4E | hsa-miR-3918     |
| EIF4E | hsa-miR-5007-3p  |
| EIF4E | hsa-miR-1651-3p  |
| EIF4E | hsa-miR-504-3p   |
| EIF4E | hsa-miR-3622b-5p |
| EIF4E | hsa-miR-6165     |
| EIF4E | hsa-miR-6502-3p  |
| EIF4E | hsa-miR-564      |
| EIF4E | hsa-miR-8063     |
| EIF4E | hsa-miR-124-3p.2 |
| EIF4E | hsa-miR-1562-5p  |
| EIF4E | hsa-miR-5787     |
| EIF4E | hsa-miR-7152-5p  |
| EIF4E | hsa-miR-125      |
| EIF4E | hsa-miR-4499     |
| EIF4E | hsa-miR-411-5p   |
| EIF4E | hsa-miR-302c-3p  |
| EIF4E | hsa-miR-4801     |
| EIF4E | hsa-miR-6819-3p  |
| EIF4E | hsa-miR-604      |
| EIF4E | hsa-miR-1746     |
| EIF4E | hsa-miR-143-3p   |
| EIF4E | hsa-miR-500-3p   |
| EIF4E | hsa-miR-365a-3p  |
| EIF4E | hsa-miR-3572-5p  |
| EIF4E | hsa-miR-499b-3p  |

|       |                  |
|-------|------------------|
| EIF4E | hsa-miR-2379     |
| EIF4E | hsa-miR-432-5p   |
| EIF4E | hsa-miR-4268     |
| EIF4E | hsa-miR-203-3p.1 |
| EIF4E | hsa-miR-7201-3p  |
| EIF4E | hsa-miR-5584-5p  |
| EIF4E | hsa-miR-28-3p    |
| EIF4E | hsa-miR-6870-3p  |
| EIF4E | hsa-miR-7390-5p  |
| EIF4E | hsa-miR-133b-5p  |
| EIF4E | hsa-miR-767-3p   |
| EIF4E | hsa-miR-1258-3p  |
| EIF4E | hsa-miR-6880-5p  |
| EIF4E | hsa-miR-27-3p    |
| EIF4E | hsa-miR-672-3p   |
| EIF4E | hsa-miR-6378     |
| EIF4E | hsa-miR-330-3p.1 |
| EIF4E | hsa-miR-7683-3p  |
| EIF4E | hsa-miR-3973     |
| EIF4E | hsa-miR-7437-5p  |
| EIF4E | hsa-miR-1269a    |
| EIF4E | hsa-miR-2384     |
| EIF4E | hsa-miR-19a-5p   |
| EIF4E | hsa-miR-7298-3p  |
| EIF4E | hsa-miR-3182     |
| EIF4E | hsa-miR-1766     |
| EIF4E | hsa-miR-2284a    |
| EIF4E | hsa-miR-614      |
| EIF4E | hsa-miR-4750-5p  |
| EIF4E | hsa-miR-7092-5p  |
| EIF4E | hsa-miR-106b-5p  |
| EIF4E | hsa-miR-2891     |
| EIF4E | hsa-miR-519e-5p  |
| EIF4E | hsa-miR-320-3p   |
| EIF4E | hsa-miR-664b-5p  |
| EIF4E | hsa-miR-9-5p     |
| EIF4E | hsa-miR-101b-5p  |
| EIF4E | hsa-miR-4498     |
| EIF4E | hsa-miR-548ad-5p |
| EIF4E | hsa-miR-4699-5p  |
| EIF4E | hsa-miR-1226-5p  |
| EIF4E | hsa-miR-1843a-5p |
| EIF4E | hsa-miR-6407     |
| EIF4E | hsa-miR-524-5p   |
| EIF4E | hsa-miR-6529-5p  |
| EIF4E | hsa-miR-6992-5p  |



|       |                  |
|-------|------------------|
| EIF4E | hsa-miR-365a-5p  |
| EIF4E | hsa-miR-210      |
| EIF4E | hsa-miR-7668-5p  |
| EIF4E | hsa-miR-651-3p   |
| EIF4E | hsa-miR-2284x    |
| EIF4E | hsa-miR-3183     |
| EIF4E | hsa-miR-200a-5p  |
| EIF4E | hsa-miR-340-3p   |
| EIF4E | hsa-miR-7386k-5p |
| EIF4E | hsa-miR-30-5p    |
| EIF4E | hsa-miR-1205     |
| EIF4E | hsa-miR-5582-5p  |
| EIF4E | hsa-miR-7364-3p  |
| EIF4E | hsa-miR-1465     |
| EIF4E | hsa-miR-302f     |
| EIF4E | hsa-miR-147a     |
| EIF4E | hsa-miR-361-5p   |
| EIF4E | hsa-miR-378      |
| EIF4E | hsa-miR-873-5p.2 |
| EIF4E | hsa-miR-2480     |
| EIF4E | hsa-miR-6843-3p  |
| EIF4E | hsa-miR-7269-5p  |
| EIF4E | hsa-miR-6769a-5p |
| EIF4E | hsa-miR-135ab-3p |
| EIF4E | hsa-miR-548ab    |
| EIF4E | hsa-miR-498      |
| EIF4E | hsa-miR-4650-3p  |
| EIF4E | hsa-miR-4741     |
| EIF4E | hsa-miR-1184     |
| EIF4E | hsa-miR-637      |
| EIF4E | hsa-miR-5619-3p  |
| EIF4E | hsa-miR-340-5p   |
| EIF4E | hsa-miR-6883-5p  |
| EIF4E | hsa-miR-3588     |
| EIF4E | hsa-miR-7041-5p  |
| EIF4E | hsa-miR-619-3p   |
| EIF4E | hsa-miR-4722-3p  |
| EIF4E | hsa-miR-203b-3p  |
| EIF4E | hsa-miR-491-5p   |
| EIF4E | hsa-miR-2335     |
| EIF4E | hsa-miR-936      |
| EIF4E | hsa-miR-6590-3p  |
| EIF4E | hsa-miR-200-3p   |
| EIF4E | hsa-miR-656      |
| EIF4E | hsa-miR-7371-5p  |
| EIF4E | hsa-miR-6824-3p  |

|       |                   |
|-------|-------------------|
| EIF4E | hsa-miR-7374a-3p  |
| EIF4E | hsa-miR-302c-3p.2 |
| EIF4E | hsa-miR-548o-5p   |
| EIF4E | hsa-miR-301-5p    |
| EIF4E | hsa-miR-4539      |
| EIF4E | hsa-miR-338-3p    |
| EIF4E | hsa-miR-1343      |
| EIF4E | hsa-miR-378-3p    |
| EIF4E | hsa-miR-337-3p    |
| EIF4E | hsa-miR-4759      |
| EIF4E | hsa-miR-6855-5p   |
| EIF4E | hsa-miR-6902-3p   |
| EIF4E | hsa-miR-4474-3p   |
| EIF4E | hsa-miR-8108      |
| EIF4E | hsa-miR-376a-1-5p |
| EIF4E | hsa-miR-4510      |
| EIF4E | hsa-miR-3604      |
| EIF4E | hsa-miR-2887      |
| EIF4E | hsa-miR-4760-3p   |
| EIF4E | hsa-miR-323a-3p   |
| EIF4E | hsa-miR-3680-3p   |
| EIF4E | hsa-miR-542-3p    |
| EIF4E | hsa-miR-34a-3p    |
| EIF4E | hsa-miR-379-3p    |
| EIF4E | hsa-miR-2442      |
| EIF4E | hsa-miR-194-5p    |
| EIF4E | hsa-miR-23-5p     |
| EIF4E | hsa-miR-6813-3p   |
| EIF4E | hsa-miR-20-5p     |
| EIF4E | hsa-miR-4633-3p   |
| EIF4E | hsa-miR-4762-5p   |
| EIF4E | hsa-miR-545-5p    |
| EIF4E | hsa-miR-6081      |
| EIF4E | hsa-miR-4772-3p   |
| EIF4E | hsa-miR-6942-3p   |
| EIF4E | hsa-miR-548ae-5p  |
| EIF4E | hsa-miR-6907-5p   |
| EIF4E | hsa-miR-6589-5p   |
| EIF4E | hsa-miR-1273d     |
| EIF4E | hsa-miR-2430      |
| EIF4E | hsa-miR-6613-3p   |
| EIF4E | hsa-miR-4436b-3p  |
| EIF4E | hsa-miR-501-5p    |
| EIF4E | hsa-miR-7687-3p   |
| EIF4E | hsa-miR-3192      |
| EIF4E | hsa-let-7f-1-3p   |

|       |                   |
|-------|-------------------|
| EIF4E | hsa-miR-7671-3p   |
| EIF4E | hsa-miR-550a-3-5p |
| EIF4E | hsa-miR-133-3p    |
| EIF4E | hsa-miR-615-5p    |
| EIF4E | hsa-miR-518c-5p   |
| EIF4E | hsa-miR-3664-5p   |
| EIF4E | hsa-miR-656-3p    |
| EIF4E | hsa-miR-1287      |
| EIF4E | hsa-miR-2284v     |
| EIF4E | hsa-miR-18-3p     |
| EIF4E | hsa-miR-8067      |
| EIF4E | hsa-miR-4645-3p   |
| EIF4E | hsa-miR-206-3p    |
| EIF4E | hsa-miR-5699-5p   |
| EIF4E | hsa-miR-6720-3p   |
| EIF4E | hsa-miR-628-3p    |
| EIF4E | hsa-miR-3913-5p   |
| EIF4E | hsa-miR-8854      |
| EIF4E | hsa-miR-125b-2-3p |
| EIF4E | hsa-miR-151       |
| EIF4E | hsa-miR-4758-5p   |
| EIF4E | hsa-miR-1239      |
| EIF4E | hsa-miR-9500      |
| EIF4E | hsa-miR-6971-5p   |
| EIF4E | hsa-miR-200ab-5p  |
| EIF4E | hsa-miR-7398t-3p  |
| EIF4E | hsa-miR-6857-3p   |
| EIF4E | hsa-miR-6333      |
| EIF4E | hsa-miR-508b      |
| EIF4E | hsa-miR-7442-3p   |
| EIF4E | hsa-miR-4773      |
| EIF4E | hsa-miR-3924      |
| EIF4E | hsa-miR-124a-5p   |
| EIF4E | hsa-miR-6933-3p   |
| EIF4E | hsa-miR-3536      |
| EIF4E | hsa-miR-1263      |
| EIF4E | hsa-miR-7113-3p   |
| EIF4E | hsa-miR-142-3p.2  |
| EIF4E | hsa-miR-34b-3p    |
| EIF4E | hsa-miR-1584-3p   |
| EIF4E | hsa-miR-149-3p    |
| EIF4E | hsa-miR-1272      |
| EIF4E | hsa-miR-487b-5p   |
| EIF4E | hsa-miR-216-5p    |
| EIF4E | hsa-miR-92a-2-5p  |
| EIF4E | hsa-miR-137-3p    |

|       |                   |
|-------|-------------------|
| EIF4E | hsa-miR-450a-1-3p |
| EIF4E | hsa-miR-4422      |
| EIF4E | hsa-miR-548p      |
| EIF4E | hsa-miR-429-5p    |
| EIF4E | hsa-miR-7160-3p   |
| EIF4E | hsa-miR-96-5p     |
| EIF4E | hsa-miR-645       |
| EIF4E | hsa-miR-7206-5p   |
| EIF4E | hsa-miR-5001-5p   |
| EIF4E | hsa-miR-7236-5p   |
| EIF4E | hsa-miR-891-3p    |
| EIF4E | hsa-miR-3200-5p   |
| EIF4E | hsa-miR-6083      |
| EIF4E | hsa-miR-206       |
| EIF4E | hsa-miR-2467-3p   |
| EIF4E | hsa-miR-188-5p    |
| EIF4E | hsa-miR-6507-5p   |
| EIF4E | hsa-miR-6366      |
| EIF4E | hsa-miR-207       |
| EIF4E | hsa-miR-223-3p    |
| EIF4E | hsa-miR-465-5p    |
| EIF4E | hsa-miR-133ab     |
| EIF4E | hsa-miR-2464-5p   |
| EIF4E | hsa-miR-3140-5p   |
| EIF4E | hsa-miR-3127-5p   |
| EIF4E | hsa-miR-6772-5p   |
| EIF4E | hsa-miR-29        |
| EIF4E | hsa-miR-6818-3p   |
| EIF4E | hsa-miR-4452      |
| EIF4E | hsa-miR-1582      |
| EIF4E | hsa-miR-582-3p    |
| EIF4E | hsa-miR-5008-3p   |
| EIF4E | hsa-miR-4680-5p   |
| EIF4E | hsa-miR-561-3p    |
| EIF4E | hsa-miR-6133      |
| EIF4E | hsa-miR-7472-3p   |
| EIF4E | hsa-miR-549a      |
| EIF4E | hsa-miR-6416-5p   |
| EIF4E | hsa-miR-661       |
| EIF4E | hsa-miR-4468      |
| EIF4E | hsa-miR-4501      |
| EIF4E | hsa-miR-4755-5p   |
| EIF4E | hsa-miR-324       |
| EIF4E | hsa-miR-1797      |
| EIF4E | hsa-miR-1278      |
| EIF4E | hsa-miR-200a-3p   |

|       |                  |
|-------|------------------|
| EIF4E | hsa-miR-199-5p   |
| EIF4E | hsa-miR-5189-5p  |
| EIF4E | hsa-miR-2367-3p  |
| EIF4E | hsa-miR-3199     |
| EIF4E | hsa-miR-4419a    |
| EIF4E | hsa-miR-5191     |
| EIF4E | hsa-miR-590-5p   |
| EIF4E | hsa-miR-885      |
| EIF4E | hsa-miR-518a-5p  |
| EIF4E | hsa-miR-6418-3p  |
| EIF4E | hsa-miR-7199-5p  |
| EIF4E | hsa-miR-129-5p   |
| EIF4E | hsa-miR-8906     |
| EIF4E | hsa-miR-7392-3p  |
| EIF4E | hsa-miR-4443     |
| EIF4E | hsa-miR-6537-3p  |
| EIF4E | hsa-miR-1236-5p  |
| EIF4E | hsa-miR-433-3p   |
| EIF4E | hsa-miR-7068-5p  |
| EIF4E | hsa-miR-7247-5p  |
| EIF4E | hsa-miR-503-5p   |
| EIF4E | hsa-miR-340-5p   |
| EIF4E | hsa-miR-6874-3p  |
| EIF4E | hsa-miR-20a-5p   |
| EIF4E | hsa-miR-367-5p   |
| EIF4E | hsa-miR-369-3p   |
| EIF4E | hsa-miR-183-5p.1 |
| EIF4E | hsa-miR-3662     |
| EIF4E | hsa-miR-4463     |
| EIF4E | hsa-miR-106      |
| EIF4E | hsa-miR-769      |
| EIF4E | hsa-miR-940      |
| EIF4E | hsa-miR-549-3p   |
| EIF4E | hsa-miR-291-5p   |
| EIF4E | hsa-miR-7661-5p  |
| EIF4E | hsa-miR-8866     |
| EIF4E | hsa-miR-485      |
| EIF4E | hsa-miR-212-5p   |
| EIF4E | hsa-miR-524-3p   |
| EIF4E | hsa-miR-6980-5p  |
| EIF4E | hsa-miR-600      |
| EIF4E | hsa-miR-6760-5p  |
| EIF4E | hsa-miR-6908-5p  |
| EIF4E | hsa-miR-6985-5p  |
| EIF4E | hsa-miR-605-5p   |
| EIF4E | hsa-miR-2486-5p  |

|       |                 |
|-------|-----------------|
| EIF4E | hsa-miR-2285d   |
| EIF4E | hsa-miR-106a-5p |
| EIF4E | hsa-miR-641     |
| EIF4E | hsa-miR-3929    |
| EIF4E | hsa-miR-5004-5p |
| EIF4E | hsa-miR-3152-3p |
| EIF4E | hsa-miR-7852-3p |
| EIF4E | hsa-miR-507b    |
| EIF4E | hsa-miR-657     |
| EIF4E | hsa-miR-3611    |
| EIF4E | hsa-miR-6836-5p |
| EIF4E | hsa-miR-649     |
| EIF4E | hsa-miR-302-3p  |
| EIF4E | hsa-miR-5680    |
| EIF4E | hsa-miR-378g    |
| EIF4E | hsa-miR-7466-3p |
| EIF4E | hsa-miR-7151-3p |
| EIF4E | hsa-miR-1343-3p |
| EIF4E | hsa-miR-7011-3p |
| EIF4E | hsa-miR-3655    |
| EIF4E | hsa-miR-2284c   |
| EIF4E | hsa-miR-411-5p  |
| EIF4E | hsa-miR-126b-5p |
| EIF4E | hsa-miR-4793-5p |
| EIF4E | hsa-miR-2366    |
| EIF4E | hsa-miR-7315-3p |
| EIF4E | hsa-miR-6889-3p |
| EIF4E | hsa-miR-5585-5p |
| EIF4E | hsa-miR-200b-3p |
| EIF4E | hsa-miR-7208-3p |
| EIF4E | hsa-miR-6513-5p |
| EIF4E | hsa-miR-7180-5p |
| EIF4E | hsa-miR-107-3p  |
| EIF4E | hsa-miR-181     |
| EIF4E | hsa-miR-363-5p  |
| EIF4E | hsa-miR-4683    |
| EIF4E | hsa-miR-4739    |
| EIF4E | hsa-miR-146a-3p |
| EIF4E | hsa-miR-548k    |
| EIF4E | hsa-miR-6508-5p |
| EIF4E | hsa-miR-188-3p  |
| EIF4E | hsa-miR-6345    |
| EIF4E | hsa-miR-7042-3p |
| EIF4E | hsa-miR-6918-5p |
| EIF4E | hsa-miR-1434-3p |
| EIF4E | hsa-miR-514a-3p |

|       |                  |
|-------|------------------|
| EIF4E | hsa-miR-10b-5p   |
| EIF4E | hsa-miR-201-3p   |
| EIF4E | hsa-miR-4634     |
| EIF4E | hsa-miR-1388-5p  |
| EIF4E | hsa-miR-93-5p    |
| EIF4E | hsa-miR-7361-5p  |
| EIF4E | hsa-miR-487a-5p  |
| EIF4E | hsa-miR-664a-5p  |
| EIF4E | hsa-miR-222-3p   |
| EIF4E | hsa-miR-6989-3p  |
| EIF4E | hsa-miR-4496     |
| EIF4E | hsa-miR-6534     |
| EIF4E | hsa-miR-421      |
| EIF4E | hsa-miR-505-5p   |
| EIF4E | hsa-miR-7074-5p  |
| EIF4E | hsa-miR-7010-5p  |
| EIF4E | hsa-miR-3085-3p  |
| EIF4E | hsa-miR-1555-5p  |
| EIF4E | hsa-miR-92a-1-5p |
| EIF4E | hsa-miR-938      |
| EIF4E | hsa-miR-580-3p   |
| EIF4E | hsa-miR-142      |
| EIF4E | hsa-miR-362-5p   |
| EIF4E | hsa-miR-144-3p   |
| EIF4E | hsa-miR-325      |
| EIF4E | hsa-miR-7162-3p  |
| EIF4E | hsa-miR-1753     |
| EIF4E | hsa-miR-8073     |
| EIF4E | hsa-miR-454-3p   |
| EIF4E | hsa-miR-19-3p    |
| EIF4E | hsa-miR-509-3-5p |
| EIF4E | hsa-miR-3653-5p  |
| EIF4E | hsa-miR-5006-3p  |
| EIF4E | hsa-miR-7333-5p  |
| EIF4E | hsa-miR-3689f    |
| EIF4E | hsa-miR-550a-5p  |
| EIF4E | hsa-miR-1322     |
| EIF4E | hsa-miR-3945     |
| EIF4E | hsa-miR-6785-5p  |
| EIF4E | hsa-miR-763      |
| EIF4E | hsa-miR-6516-5p  |
| EIF4E | hsa-miR-3192-3p  |
| EIF4E | hsa-miR-3078-3p  |
| EIF4E | hsa-miR-33       |
| EIF4E | hsa-miR-379-5p   |
| EIF4E | hsa-miR-6554-3p  |

|       |                   |
|-------|-------------------|
| EIF4E | hsa-miR-4487      |
| EIF4E | hsa-miR-7297-3p   |
| EIF4E | hsa-miR-448       |
| EIF4E | hsa-miR-8052      |
| EIF4E | hsa-miR-4797-3p   |
| EIF4E | hsa-miR-6529a     |
| EIF4E | hsa-miR-675-5p    |
| EIF4E | hsa-miR-7703      |
| EIF4E | hsa-miR-764       |
| EIF4E | hsa-miR-3123      |
| EIF4E | hsa-miR-4668-5p   |
| EIF4E | hsa-miR-650d      |
| EIF4E | hsa-miR-5009-3p   |
| EIF4E | hsa-miR-2285u     |
| EIF4E | hsa-miR-7079-3p   |
| EIF4E | hsa-miR-6883-3p   |
| EIF4E | hsa-miR-1254      |
| EIF4E | hsa-miR-298       |
| EIF4E | hsa-miR-450-5p    |
| EIF4E | hsa-miR-223-5p    |
| EIF4E | hsa-miR-203       |
| EIF4E | hsa-miR-3162-5p   |
| EIF4E | hsa-miR-200bc-3p  |
| EIF4E | hsa-miR-1664-3p   |
| EIF4E | hsa-miR-4691-5p   |
| EIF4E | hsa-miR-4282      |
| EIF4E | hsa-miR-6771-3p   |
| EIF4E | hsa-miR-2322-5p   |
| EIF4E | hsa-miR-8056      |
| EIF4E | hsa-miR-502-3p    |
| EIF4E | hsa-miR-190-3p    |
| EIF4E | hsa-miR-625-3p    |
| EIF4E | hsa-miR-4700-3p   |
| EIF4E | hsa-miR-7175-5p   |
| EIF4E | hsa-miR-215-3p    |
| EIF4E | hsa-miR-3090-5p   |
| EIF4E | hsa-miR-7220-3p   |
| EIF4E | hsa-miR-8817      |
| EIF4E | hsa-miR-181b-2-3p |
| EIF4E | hsa-miR-8061      |
| EIF4E | hsa-miR-6910-5p   |
| EIF4E | hsa-miR-942-3p    |
| EIF4E | hsa-miR-597-5p    |
| EIF4E | hsa-miR-4524a-5p  |
| EIF4E | hsa-miR-454       |
| EIF4E | hsa-miR-8062      |



|       |                  |
|-------|------------------|
| EIF4E | hsa-miR-452-5p   |
| EIF4E | hsa-miR-1812-3p  |
| EIF4E | hsa-miR-17-5p    |
| EIF4E | hsa-miR-486-5p   |
| EIF4E | hsa-miR-494-5p   |
| EIF4E | hsa-miR-6983-3p  |
| EIF4E | hsa-miR-3187-5p  |
| EIF4E | hsa-miR-128-3p   |
| EIF4E | hsa-miR-6780a-5p |
| EIF4E | hsa-miR-142-5p   |
| EIF4E | hsa-miR-4489     |
| EIF4E | hsa-miR-7394b-5p |
| EIF4E | hsa-miR-2284d    |
| EIF4E | hsa-miR-3580-3p  |
| EIF4E | hsa-miR-1708     |
| EIF4E | hsa-miR-7045-5p  |
| EIF4E | hsa-miR-499-5p   |
| EIF4E | hsa-miR-6860     |
| EIF4E | hsa-miR-2285y    |
| EIF4E | hsa-miR-1768     |
| EIF4E | hsa-miR-7076-5p  |
| EIF4E | hsa-miR-197-3p   |
| EIF4E | hsa-miR-6758-3p  |
| EIF4E | hsa-miR-432-5p   |
| EIF4E | hsa-miR-885-5p   |
| EIF4E | hsa-miR-1551-5p  |
| EIF4E | hsa-miR-497-3p   |
| EIF4E | hsa-miR-7108-5p  |
| EIF4E | hsa-miR-6867-5p  |
| EIF4E | hsa-miR-6765-3p  |
| EIF4E | hsa-miR-1804     |
| EIF4E | hsa-miR-3561-5p  |
| EIF4E | hsa-miR-194-5p   |
| EIF4E | hsa-miR-5623-3p  |
| EIF4E | hsa-miR-126-5p   |
| EIF4E | hsa-miR-1185-3p  |
| EIF4E | hsa-miR-548ay-3p |
| EIF4E | hsa-miR-1667-5p  |
| EIF4E | hsa-miR-5588-3p  |
| EIF4E | hsa-miR-577-3p   |
| EIF4E | hsa-miR-6652-5p  |
| EIF4E | hsa-miR-105b     |
| EIF4E | hsa-miR-6514-5p  |
| EIF4E | hsa-miR-7203-5p  |
| EIF4E | hsa-miR-4522     |
| EIF4E | hsa-miR-7386h-5p |

|         |                  |
|---------|------------------|
| EIF4E   | hsa-miR-380      |
| EIF4E   | hsa-miR-569      |
| EIF4E   | hsa-miR-562      |
| EIF4E   | hsa-miR-6760-3p  |
| EIF4E   | hsa-miR-576-5p   |
| EIF4E   | hsa-miR-423-3p   |
| EIF4E   | hsa-miR-6782-3p  |
| EIF4E   | hsa-miR-3145-3p  |
| EIF4E   | hsa-miR-1270     |
| EIF4E   | hsa-miR-3116     |
| EIF4E1B | hsa-miR-152-3p   |
| EIF4E1B | hsa-miR-328      |
| EIF4E1B | hsa-miR-6784-3p  |
| EIF4E1B | hsa-miR-5008-5p  |
| EIF4E1B | hsa-miR-30c-2-3p |
| EIF4E1B | hsa-miR-3667-3p  |
| EIF4E1B | hsa-miR-6407     |
| EIF4E1B | hsa-miR-1293     |
| EIF4E1B | hsa-miR-30-3p    |
| EIF4E1B | hsa-miR-485-5p   |
| EIF4E1B | hsa-miR-500-3p   |
| EIF4E1B | hsa-miR-455-3p.1 |
| EIF4E1B | hsa-let-7c-3p    |
| EIF4E1B | hsa-miR-1470     |
| EIF4E1B | hsa-miR-208-3p   |
| EIF4E1B | hsa-miR-421      |
| EIF4E1B | hsa-miR-376c     |
| EIF4E1B | hsa-miR-1191a    |
| EIF4E1B | hsa-miR-3934-3p  |
| EIF4E1B | hsa-miR-4494     |
| EIF4E1B | hsa-miR-7386o-3p |
| EIF4E1B | hsa-miR-8887     |
| EIF4E1B | hsa-miR-1225     |
| EIF4E1B | hsa-miR-4667-5p  |
| EIF4E1B | hsa-miR-188-5p   |
| EIF4E1B | hsa-miR-7045-3p  |
| EIF4E1B | hsa-miR-6851-3p  |
| EIF4E1B | hsa-miR-885-5p   |
| EIF4E1B | hsa-miR-4650-5p  |
| EIF4E1B | hsa-miR-7017-5p  |
| EIF4E1B | hsa-miR-3176     |
| EIF4E1B | hsa-miR-4483     |
| EIF4E1B | hsa-miR-107-5p   |
| EIF4E1B | hsa-miR-328-3p   |
| EIF4E1B | hsa-miR-24-3p    |
| EIF4E1B | hsa-miR-8790     |

|         |                   |
|---------|-------------------|
| EIF4E1B | hsa-miR-4742      |
| EIF4E1B | hsa-miR-2461-5p   |
| EIF4E1B | hsa-miR-92a-2-5p  |
| EIF4E1B | hsa-miR-874-5p    |
| EIF4E1B | hsa-miR-874       |
| EIF4E1B | hsa-miR-548j-5p   |
| EIF4E1B | hsa-miR-4518      |
| EIF4E1B | hsa-miR-350       |
| EIF4E1B | hsa-miR-6825-5p   |
| EIF4E1B | hsa-miR-3965      |
| EIF4E1B | hsa-miR-686       |
| EIF4E1B | hsa-miR-1260a     |
| EIF4E1B | hsa-miR-1284      |
| EIF4E1B | hsa-miR-2483      |
| EIF4E1B | hsa-miR-1266-5p   |
| EIF4E1B | hsa-miR-1777      |
| EIF4E1B | hsa-miR-3120-5p   |
| EIF4E1B | hsa-miR-8827      |
| EIF4E1B | hsa-miR-2454-3p   |
| EIF4E1B | hsa-miR-6852-5p   |
| EIF4E1B | hsa-miR-15-5p     |
| EIF4E1B | hsa-miR-2284ab    |
| EIF4E1B | hsa-miR-8804      |
| EIF4E1B | hsa-miR-670-3p    |
| EIF4E1B | hsa-miR-30e-3p    |
| EIF4E1B | hsa-miR-873-5p    |
| EIF4E1B | hsa-miR-346-5p    |
| EIF4E1B | hsa-miR-4731-5p   |
| EIF4E1B | hsa-miR-939-5p    |
| EIF4E1B | hsa-miR-6895-3p   |
| EIF4E1B | hsa-miR-1266      |
| EIF4E1B | hsa-miR-6766-5p   |
| EIF4E1B | hsa-miR-4433b-5p  |
| EIF4E1B | hsa-miR-3076-5p   |
| EIF4E1B | hsa-miR-1841      |
| EIF4E1B | hsa-miR-3614-5p   |
| EIF4E1B | hsa-miR-6841-3p   |
| EIF4E1B | hsa-miR-548ap-5p  |
| EIF4E1B | hsa-miR-3659      |
| EIF4E1B | hsa-miR-1199-5p   |
| EIF4E1B | hsa-miR-1241      |
| EIF4E1B | hsa-miR-761       |
| EIF4E1B | hsa-miR-939-5p    |
| EIF4E1B | hsa-miR-6770-3p   |
| EIF4E1B | hsa-miR-7094-1-5p |
| EIF4E1B | hsa-miR-4511      |

|         |                 |
|---------|-----------------|
| EIF4E1B | hsa-miR-1584-3p |
| EIF4E1B | hsa-miR-188-3p  |
| EIF4E1B | hsa-miR-9768-3p |
| EIF4E1B | hsa-miR-349     |
| EIF4E1B | hsa-miR-1224-3p |
| EIF4E1B | hsa-miR-545-3p  |
| EIF4E1B | hsa-miR-2300-5p |
| EIF4E1B | hsa-miR-4717-5p |
| EIF4E1B | hsa-miR-6876-3p |
| EIF4E1B | hsa-miR-8850    |
| EIF4E1B | hsa-miR-6888-3p |
| EIF4E1B | hsa-miR-1930-3p |
| EIF4E1B | hsa-miR-2284n   |
| EIF4E1B | hsa-miR-940     |
| EIF4E1B | hsa-miR-494     |
| EIF4E1B | hsa-miR-6990-3p |
| EIF4E1B | hsa-miR-7068-5p |
| EIF4E1B | hsa-miR-6734-3p |
| EIF4E1B | hsa-miR-1225-5p |
| EIF4E1B | hsa-miR-6742-3p |
| EIF4E1B | hsa-miR-3922-5p |
| EIF4E1B | hsa-miR-146     |
| EIF4E1B | hsa-miR-455-3p  |
| EIF4E1B | hsa-miR-378-3p  |
| EIF4E1B | hsa-miR-4715-3p |
| EIF4E1B | hsa-miR-338-3p  |
| EIF4E1B | hsa-miR-4266    |
| EIF4E1B | hsa-miR-302a-3p |
| EIF4E1B | hsa-miR-409a    |
| EIF4E1B | hsa-miR-370     |
| EIF4E1B | hsa-miR-2373-3p |
| EIF4E1B | hsa-miR-7177-3p |
| EIF4E1B | hsa-miR-2334    |
| EIF4E1B | hsa-miR-1-3p    |
| EIF4E1B | hsa-miR-2284k   |
| EIF4E1B | hsa-miR-4258    |
| EIF4E1B | hsa-miR-6089    |
| EIF4E1B | hsa-miR-2343    |
| EIF4E1B | hsa-miR-361-5p  |
| EIF4E1B | hsa-miR-7855-5p |
| EIF4E1B | hsa-miR-8089    |
| EIF4E1B | hsa-miR-3189-5p |
| EIF4E1B | hsa-miR-4695-5p |
| EIF4E1B | hsa-miR-622     |
| EIF4E1B | hsa-miR-7035-3p |
| EIF4E1B | hsa-miR-4708-3p |

|         |                  |
|---------|------------------|
| EIF4E1B | hsa-miR-203      |
| EIF4E1B | hsa-miR-21-5p    |
| EIF4E1B | hsa-miR-6077     |
| EIF4E1B | hsa-miR-3192-3p  |
| EIF4E1B | hsa-miR-5000-3p  |
| EIF4E1B | hsa-miR-3915     |
| EIF4E1B | hsa-miR-4710     |
| EIF4E1B | hsa-miR-548am-5p |
| EIF4E1B | hsa-miR-7976     |
| EIF4E1B | hsa-miR-3154     |
| EIF4E1B | hsa-miR-494-3p   |
| EIF4E1B | hsa-miR-6809-5p  |
| EIF4E1B | hsa-miR-3577-3p  |
| EIF4E1B | hsa-miR-3929     |
| EIF4E1B | hsa-miR-548b-3p  |
| EIF4E1B | hsa-miR-1207-3p  |
| EIF4E1B | hsa-miR-7-5p     |
| EIF4E1B | hsa-miR-545-3p   |
| EIF4E1B | hsa-miR-194-3p   |
| EIF4E1B | hsa-miR-4792     |
| EIF4E1B | hsa-miR-5004-5p  |
| EIF4E1B | hsa-miR-200a-3p  |
| EIF4E1B | hsa-miR-660-3p   |
| EIF4E1B | hsa-miR-548w     |
| EIF4E1B | hsa-miR-1291     |
| EIF4E1B | hsa-miR-760-5p   |
| EIF4E1B | hsa-miR-627-5p   |
| EIF4E1B | hsa-miR-1249-3p  |
| EIF4E1B | hsa-miR-1910-5p  |
| EIF4E1B | hsa-miR-4649-3p  |
| EIF4E1B | hsa-miR-548d-5p  |
| EIF4E1B | hsa-miR-3664-3p  |
| EIF4E1B | hsa-miR-7201-3p  |
| EIF4E1B | hsa-miR-24-3p    |
| EIF4E1B | hsa-miR-7327-5p  |
| EIF4E1B | hsa-miR-6840-3p  |
| EIF4E1B | hsa-miR-6090     |
| EIF4E1B | hsa-miR-4323     |
| EIF4E1B | hsa-miR-2319     |
| EIF4E1B | hsa-miR-548h-5p  |
| EIF4E1B | hsa-miR-195-5p   |
| EIF4E1B | hsa-miR-483-3p   |
| EIF4E1B | hsa-miR-2326     |
| EIF4E1B | hsa-miR-4316     |
| EIF4E1B | hsa-miR-352      |
| EIF4E1B | hsa-miR-2957     |

|         |                  |
|---------|------------------|
| EIF4E1B | hsa-miR-2284d    |
| EIF4E1B | hsa-miR-5002-3p  |
| EIF4E1B | hsa-miR-4640-3p  |
| EIF4E1B | hsa-miR-3966     |
| EIF4E1B | hsa-miR-125-5p   |
| EIF4E1B | hsa-miR-2284v    |
| EIF4E1B | hsa-miR-370-5p   |
| EIF4E1B | hsa-miR-3664-5p  |
| EIF4E1B | hsa-miR-214-3p   |
| EIF4E1B | hsa-miR-4780     |
| EIF4E1B | hsa-miR-6776-5p  |
| EIF4E1B | hsa-miR-2894     |
| EIF4E1B | hsa-miR-4516     |
| EIF4E1B | hsa-miR-1306-5p  |
| EIF4E1B | hsa-miR-143-5p   |
| EIF4E1B | hsa-miR-6858-5p  |
| EIF4E1B | hsa-miR-7157-3p  |
| EIF4E1B | hsa-miR-422      |
| EIF4E1B | hsa-miR-3115     |
| EIF4E1B | hsa-miR-548ad-5p |
| EIF4E1B | hsa-miR-4264     |
| EIF4E1B | hsa-miR-324-5p   |
| EIF4E1B | hsa-miR-3973     |
| EIF4E1B | hsa-miR-376c-3p  |
| EIF4E1B | hsa-miR-338-3p   |
| EIF4E1B | hsa-miR-1266-3p  |
| EIF4E1B | hsa-miR-8903     |
| EIF4E1B | hsa-miR-665      |
| EIF4E1B | hsa-miR-18-3p    |
| EIF4E1B | hsa-miR-141-3p   |
| EIF4E1B | hsa-miR-208-5p   |
| EIF4E1B | hsa-miR-601      |
| EIF4E1B | hsa-miR-186-3p   |
| EIF4E1B | hsa-miR-5627-5p  |
| EIF4E1B | hsa-miR-561-3p   |
| EIF4E1B | hsa-miR-7169-5p  |
| EIF4E1B | hsa-miR-6862-3p  |
| EIF4E1B | hsa-miR-4720-3p  |
| EIF4E1B | hsa-miR-7191-3p  |
| EIF4E1B | hsa-miR-33-3p    |
| EIF4E1B | hsa-miR-148-3p   |
| EIF4E1B | hsa-miR-3151     |
| EIF4E1B | hsa-miR-361-3p   |
| EIF4E1B | hsa-miR-4766-3p  |
| EIF4E1B | hsa-miR-7386m-3p |
| EIF4E1B | hsa-miR-6893-5p  |

|         |                   |
|---------|-------------------|
| EIF4E1B | hsa-miR-548aq-5p  |
| EIF4E1B | hsa-miR-149-5p    |
| EIF4E1B | hsa-miR-2284-5p   |
| EIF4E1B | hsa-miR-497-5p    |
| EIF4E1B | hsa-miR-4795-3p   |
| EIF4E1B | hsa-miR-4433a-3p  |
| EIF4E1B | hsa-miR-2284-3p   |
| EIF4E1B | hsa-miR-938       |
| EIF4E1B | hsa-miR-629-5p    |
| EIF4E1B | hsa-miR-4311      |
| EIF4E1B | hsa-miR-1207      |
| EIF4E1B | hsa-miR-2389      |
| EIF4E1B | hsa-miR-5587-5p   |
| EIF4E1B | hsa-miR-4689      |
| EIF4E1B | hsa-miR-3110-5p   |
| EIF4E1B | hsa-miR-629-3p    |
| EIF4E1B | hsa-miR-516-3p    |
| EIF4E1B | hsa-miR-206       |
| EIF4E1B | hsa-miR-10-5p     |
| EIF4E1B | hsa-miR-3620-3p   |
| EIF4E1B | hsa-miR-589-5p    |
| EIF4E1B | hsa-miR-181a-2-3p |
| EIF4E1B | hsa-miR-322-5p    |
| EIF4E1B | hsa-miR-7386k-3p  |
| EIF4E1B | hsa-miR-3975      |
| EIF4E1B | hsa-miR-1276      |
| EIF4E1B | hsa-miR-6944-5p   |
| EIF4E1B | hsa-miR-6393      |
| EIF4E1B | hsa-miR-33-5p     |
| EIF4E1B | hsa-miR-3151-3p   |
| EIF4E1B | hsa-miR-4434      |
| EIF4E1B | hsa-miR-182-5p    |
| EIF4E1B | hsa-miR-2355-5p   |
| EIF4E1B | hsa-miR-626       |
| EIF4E1B | hsa-miR-3922-3p   |
| EIF4E1B | hsa-miR-302-3p    |
| EIF4E1B | hsa-miR-654-3p    |
| EIF4E1B | hsa-miR-27a-5p    |
| EIF4E1B | hsa-miR-548ay-5p  |
| EIF4E1B | hsa-miR-7171-3p   |
| EIF4E1B | hsa-miR-6745      |
| EIF4E1B | hsa-miR-188-5p    |
| EIF4E1B | hsa-miR-3106-3p   |
| EIF4E1B | hsa-miR-1914-5p   |
| EIF4E1B | hsa-miR-2276-5p   |
| EIF4E1B | hsa-miR-2284c     |

|         |                  |
|---------|------------------|
| EIF4E1B | hsa-miR-197-3p   |
| EIF4E1B | hsa-miR-6813-3p  |
| EIF4E1B | hsa-miR-5699-5p  |
| EIF4E1B | hsa-miR-7231-3p  |
| EIF4E1B | hsa-miR-3175     |
| EIF4E1B | hsa-miR-1324     |
| EIF4E1B | hsa-miR-548b-3p  |
| EIF4E1B | hsa-miR-520-5p   |
| EIF4E1B | hsa-miR-362-3p   |
| EIF4E1B | hsa-miR-6889-3p  |
| EIF4E1B | hsa-miR-525-5p   |
| EIF4E1B | hsa-miR-452-5p   |
| EIF4E1B | hsa-miR-2368-3p  |
| EIF4E1B | hsa-miR-708-5p   |
| EIF4E1B | hsa-miR-4742-5p  |
| EIF4E1B | hsa-miR-7063-5p  |
| EIF4E1B | hsa-miR-702-3p   |
| EIF4E1B | hsa-miR-4478     |
| EIF4E1B | hsa-miR-6770-5p  |
| EIF4E1B | hsa-miR-31-5p    |
| EIF4E1B | hsa-miR-6729-3p  |
| EIF4E1B | hsa-miR-548bb-5p |
| EIF4E1B | hsa-miR-4467     |
| EIF4E1B | hsa-miR-548ae-5p |
| EIF4E1B | hsa-miR-1955-3p  |
| EIF4E1B | hsa-miR-1258-5p  |
| EIF4E1B | hsa-miR-7108-3p  |
| EIF4E1B | hsa-miR-1233-3p  |
| EIF4E1B | hsa-miR-7166-5p  |
| EIF4E1B | hsa-miR-7664-5p  |
| EIF4E1B | hsa-miR-1287-3p  |
| EIF4E1B | hsa-miR-2439-5p  |
| EIF4E1B | hsa-miR-6886-3p  |
| EIF4E1B | hsa-miR-3059-5p  |
| EIF4E1B | hsa-miR-548b-5p  |
| EIF4E1B | hsa-miR-6763-3p  |
| EIF4E1B | hsa-miR-642a-5p  |
| EIF4E1B | hsa-miR-4667     |
| EIF4E1B | hsa-miR-6818-3p  |
| EIF4E1B | hsa-miR-6839-3p  |
| EIF4E1B | hsa-miR-548      |
| EIF4E1B | hsa-miR-663b     |
| EIF4E1B | hsa-miR-499-5p   |
| EIF4E1B | hsa-miR-545-5p   |
| EIF4E1B | hsa-miR-548as-5p |
| EIF4E1B | hsa-miR-3075-3p  |



|         |                    |
|---------|--------------------|
| EIF4E1B | hsa-miR-9-5p       |
| EIF4E1B | hsa-miR-4485-5p    |
| EIF4E1B | hsa-miR-873-5p.1   |
| EIF4E1B | hsa-miR-548y       |
| EIF4E1B | hsa-miR-6503-3p    |
| EIF4E1B | hsa-miR-4436b-5p   |
| EIF4E1B | hsa-miR-1255b-2-3p |
| EIF4E1B | hsa-miR-6737-3p    |
| EIF4E1B | hsa-miR-2466-3p    |
| EIF4E1B | hsa-miR-766-3p     |
| EIF4E1B | hsa-miR-6769a-3p   |
| EIF4E1B | hsa-miR-100-3p     |
| EIF4E1B | hsa-miR-6529-3p    |
| EIF4E1B | hsa-miR-1306-3p    |
| EIF4E1B | hsa-miR-6912-5p    |
| EIF4E1B | hsa-miR-3190-5p    |
| EIF4E1B | hsa-miR-873-5p     |
| EIF4E1B | hsa-miR-6356       |
| EIF4E1B | hsa-miR-5008-3p    |
| EIF4E1B | hsa-miR-670        |
| EIF4E1B | hsa-miR-186-5p     |
| EIF4E1B | hsa-miR-7033-3p    |
| EIF4E1B | hsa-miR-7657-3p    |
| EIF4E1B | hsa-miR-140-3p.1   |
| EIF4E1B | hsa-miR-4261       |
| EIF4E1B | hsa-miR-7179-3p    |
| EIF4E1B | hsa-miR-662        |
| EIF4E1B | hsa-miR-6856-3p    |
| EIF4E1B | hsa-miR-7197-3p    |
| EIF4E1B | hsa-miR-125        |
| EIF4E1B | hsa-miR-5092       |
| EIF4E1B | hsa-miR-33         |
| EIF4E1B | hsa-miR-2284j      |
| EIF4E1B | hsa-miR-7364-5p    |
| EIF4E1B | hsa-miR-4804-3p    |
| EIF4E1B | hsa-miR-4797-3p    |
| EIF4E1B | hsa-miR-8908-5p    |
| EIF4E1B | hsa-miR-4999-3p    |
| EIF4E1B | hsa-miR-8836       |
| EIF4E1B | hsa-miR-6807-5p    |
| EIF4E1B | hsa-miR-1343-3p    |
| EIF4E1B | hsa-miR-4700-5p    |
| EIF4E1B | hsa-miR-125a-3p    |
| EIF4E1B | hsa-miR-1343       |
| EIF4E1B | hsa-miR-8805       |
| EIF4E1B | hsa-miR-548c-5p    |

|         |                  |
|---------|------------------|
| EIF4E1B | hsa-miR-7110-3p  |
| EIF4E1B | hsa-miR-300-5p   |
| EIF4E1B | hsa-miR-593-3p   |
| EIF4E1B | hsa-miR-544b     |
| EIF4E1B | hsa-miR-6500-3p  |
| EIF4E1B | hsa-miR-4687-5p  |
| EIF4E1B | hsa-miR-559      |
| EIF4E1B | hsa-miR-4768-3p  |
| EIF4E1B | hsa-miR-3680-3p  |
| EIF4E1B | hsa-miR-7108-5p  |
| EIF4E1B | hsa-miR-5125     |
| EIF4E1B | hsa-miR-548au-5p |
| EIF4E1B | hsa-miR-212-5p   |
| EIF4E1B | hsa-miR-1296-5p  |
| EIF4E1B | hsa-miR-3179     |
| EIF4E1B | hsa-miR-3167-5p  |
| EIF4E1B | hsa-miR-7-5p     |
| EIF4E1B | hsa-miR-8834b    |
| EIF4E1B | hsa-miR-4459     |
| EIF4E1B | hsa-miR-759      |
| EIF4E1B | hsa-miR-7152-5p  |
| EIF4E1B | hsa-miR-642      |
| EIF4E1B | hsa-miR-583      |
| EIF4E1B | hsa-miR-6892-3p  |
| EIF4E1B | hsa-miR-5007-5p  |
| EIF4E1B | hsa-miR-186-5p   |
| EIF4E1B | hsa-miR-197-5p   |
| EIF4E1B | hsa-miR-1233-3p  |
| EIF4E1B | hsa-miR-193-3p   |
| EIF4E1B | hsa-miR-8901     |
| EIF4E1B | hsa-miR-2433     |
| EIF4E1B | hsa-miR-7656-3p  |
| EIF4E1B | hsa-miR-6779-3p  |
| EIF4E1B | hsa-miR-2284m    |
| EIF4E1B | hsa-miR-3188     |
| EIF4E1B | hsa-miR-1225-3p  |
| EIF4E1B | hsa-miR-378      |
| EIF4E1B | hsa-miR-7646-5p  |
| EIF4E1B | hsa-miR-6802-3p  |
| EIF4E1B | hsa-miR-3120-3p  |
| EIF4E1B | hsa-miR-6808-5p  |
| EIF4E1B | hsa-miR-2327     |
| EIF4E1B | hsa-miR-6878-5p  |
| EIF4E1B | hsa-miR-1962     |
| EIF4E1B | hsa-miR-7069-3p  |
| EIF4E1B | hsa-miR-4433a-5p |

|         |                   |
|---------|-------------------|
| EIF4E1B | hsa-miR-7167-5p   |
| EIF4E1B | hsa-miR-548a-5p   |
| EIF4E1B | hsa-miR-5693      |
| EIF4E1B | hsa-miR-6958-3p   |
| EIF4E1B | hsa-miR-2306      |
| EIF4E1B | hsa-miR-499b-5p   |
| EIF4E1B | hsa-miR-329       |
| EIF4E1B | hsa-miR-370-3p    |
| EIF4E1B | hsa-miR-8832      |
| EIF4E1B | hsa-miR-363-5p    |
| EIF4E1B | hsa-miR-548o-5p   |
| EIF4E1B | hsa-miR-2467-5p   |
| EIF4E1B | hsa-miR-384       |
| EIF4E1B | hsa-miR-7224-3p   |
| EIF4E1B | hsa-miR-4667-3p   |
| EIF4E1B | hsa-miR-6793-3p   |
| EIF4E1B | hsa-miR-4419b     |
| EIF4E1B | hsa-miR-4751      |
| EIF4E1B | hsa-miR-455-5p    |
| EIF4E1B | hsa-miR-548ab     |
| EIF4E1B | hsa-miR-4290      |
| EIF4E1B | hsa-miR-3943      |
| EIF4E1B | hsa-miR-30-5p     |
| EIF4E1B | hsa-miR-539-5p    |
| EIF4E1B | hsa-miR-325       |
| EIF4E1B | hsa-miR-8905      |
| EIF4E1B | hsa-miR-4779      |
| EIF4E1B | hsa-miR-1972      |
| EIF4E1B | hsa-miR-548ar-5p  |
| EIF4E1B | hsa-miR-181b-2-3p |
| EIF4E1B | hsa-miR-879-5p    |
| EIF4E1B | hsa-miR-939-3p    |
| EIF4E1B | hsa-miR-674-5p    |
| EIF4E1B | hsa-miR-1827      |
| EIF4E1B | hsa-miR-16-5p     |
| EIF4E1B | hsa-miR-128-3p    |
| EIF4E1B | hsa-miR-4446-3p   |
| EIF4E1B | hsa-miR-3692-3p   |
| EIF4E1B | hsa-miR-3140-3p   |
| EIF4E1B | hsa-miR-548i      |
| EIF4E1B | hsa-miR-22-3p     |
| EIF4E1B | hsa-miR-548ak     |
| EIF4E1B | hsa-miR-7188-5p   |
| EIF4E1B | hsa-miR-1224-5p   |
| EIF4E1B | hsa-miR-5703      |
| EIF4E1B | hsa-miR-6756-5p   |

|         |                   |
|---------|-------------------|
| EIF4E1B | hsa-miR-502-5p    |
| EIF4E1B | hsa-miR-645       |
| EIF4E1B | hsa-miR-593-3p    |
| EIF4E1B | hsa-miR-2285      |
| EIF4E1B | hsa-miR-6798-3p   |
| EIF4E1B | hsa-miR-2373-5p   |
| EIF4E1B | hsa-miR-1343-5p   |
| EIF4E1B | hsa-miR-6775-3p   |
| EIF4E1B | hsa-miR-200a-3p   |
| EIF4E1B | hsa-miR-6865-3p   |
| EIF4E1B | hsa-miR-3150a-3p  |
| EIF4E1B | hsa-miR-5627-3p   |
| EIF4E2  | hsa-miR-7270-3p   |
| EIF4E2  | hsa-miR-218a-1-3p |
| EIF4E2  | hsa-miR-3559-3p   |
| EIF4E2  | hsa-miR-302a-3p   |
| EIF4E2  | hsa-miR-8079      |
| EIF4E2  | hsa-miR-7323-3p   |
| EIF4E2  | hsa-miR-7243-3p   |
| EIF4E2  | hsa-miR-8799      |
| EIF4E2  | hsa-miR-6970-3p   |
| EIF4E2  | hsa-miR-3912-5p   |
| EIF4E2  | hsa-miR-7177-5p   |
| EIF4E2  | hsa-miR-7039-3p   |
| EIF4E2  | hsa-miR-374-3p    |
| EIF4E2  | hsa-miR-6786-3p   |
| EIF4E2  | hsa-miR-6780a-3p  |
| EIF4E2  | hsa-miR-1266-3p   |
| EIF4E2  | hsa-miR-2471-5p   |
| EIF4E2  | hsa-miR-295-5p    |
| EIF4E2  | hsa-miR-1190      |
| EIF4E2  | hsa-miR-6994-5p   |
| EIF4E2  | hsa-miR-3067-5p   |
| EIF4E2  | hsa-miR-20-3p     |
| EIF4E2  | hsa-miR-302c-5p   |
| EIF4E2  | hsa-miR-3154      |
| EIF4E2  | hsa-miR-540-5p    |
| EIF4E2  | hsa-miR-185-3p    |
| EIF4E2  | hsa-miR-7077-3p   |
| EIF4E2  | hsa-miR-29c-3p    |
| EIF4E2  | hsa-miR-3655      |
| EIF4E2  | hsa-miR-193-5p    |
| EIF4E2  | hsa-miR-758-3p    |
| EIF4E2  | hsa-miR-877-3p    |
| EIF4E2  | hsa-miR-589-3p    |
| EIF4E2  | hsa-miR-1796      |

|        |                  |
|--------|------------------|
| EIF4E2 | hsa-miR-1207-3p  |
| EIF4E2 | hsa-miR-218-1-3p |
| EIF4E2 | hsa-miR-292b-5p  |
| EIF4E2 | hsa-miR-1912-3p  |
| EIF4E2 | hsa-miR-20b-3p   |
| EIF4E2 | hsa-miR-7222-3p  |
| EIF4E2 | hsa-miR-292a-5p  |
| EIF4E2 | hsa-miR-7316-5p  |
| EIF4E2 | hsa-miR-767      |
| EIF4E2 | hsa-miR-6881-3p  |
| EIF4E2 | hsa-miR-496b     |
| EIF4E2 | hsa-miR-7191-5p  |
| EIF4E2 | hsa-miR-8898     |
| EIF4E2 | hsa-miR-6971-3p  |
| EIF4E2 | hsa-miR-290      |
| EIF4E2 | hsa-miR-22-3p    |
| EIF4E2 | hsa-miR-7111-3p  |
| EIF4E2 | hsa-miR-132-5p   |
| EIF4E2 | hsa-miR-7050-3p  |
| EIF4E2 | hsa-miR-1207     |
| EIF4E2 | hsa-miR-665      |
| EIF4E2 | hsa-miR-7641     |
| EIF4E2 | hsa-miR-592-5p   |
| EIF4E2 | hsa-miR-683      |
| EIF4E2 | hsa-miR-6932-3p  |
| EIF4E2 | hsa-miR-302a-5p  |
| EIF4E2 | hsa-miR-299-5p   |
| EIF4E2 | hsa-miR-29b-1-5p |
| EIF4E2 | hsa-miR-29a-3p   |
| EIF4E2 | hsa-miR-7048-3p  |
| EIF4E2 | hsa-miR-3163     |
| EIF4E2 | hsa-miR-184      |
| EIF4E2 | hsa-miR-293-5p   |
| EIF4E2 | hsa-miR-7682-5p  |
| EIF4E2 | hsa-miR-4477a    |
| EIF4E2 | hsa-miR-374b-3p  |
| EIF4E2 | hsa-miR-7086-3p  |
| EIF4E2 | hsa-miR-22-3p    |
| EIF4E2 | hsa-miR-9769-3p  |
| EIF4E2 | hsa-miR-585-5p   |
| EIF4E2 | hsa-miR-3102-3p  |
| EIF4E2 | hsa-miR-2325c    |
| EIF4E2 | hsa-miR-597      |
| EIF4E2 | hsa-miR-3085-5p  |
| EIF4E2 | hsa-miR-5000-3p  |
| EIF4E2 | hsa-miR-3613-5p  |

|        |                 |
|--------|-----------------|
| EIF4E2 | hsa-miR-449c-3p |
| EIF4E2 | hsa-miR-669p-3p |
| EIF4E2 | hsa-miR-5682    |
| EIF4E2 | hsa-miR-7389-5p |
| EIF4E2 | hsa-miR-290a-5p |
| EIF4E2 | hsa-miR-299a-5p |
| EIF4E2 | hsa-miR-665-3p  |
| EIF4E2 | hsa-miR-26-3p   |
| EIF4E2 | hsa-miR-1236-3p |
| EIF4E2 | hsa-miR-5124a   |
| EIF4E2 | hsa-miR-6871-3p |
| EIF4E2 | hsa-miR-224-3p  |
| EIF4E2 | hsa-miR-322-3p  |
| EIF4E2 | hsa-miR-1245a   |
| EIF4E2 | hsa-miR-6961-3p |
| EIF4E2 | hsa-miR-7243-5p |
| EIF4E2 | hsa-miR-8096    |
| EIF4E2 | hsa-miR-3059-5p |
| EIF4E2 | hsa-miR-6348    |
| EIF4E2 | hsa-miR-292-5p  |
| EIF4E2 | hsa-miR-3099-5p |
| EIF4E2 | hsa-miR-29-3p   |
| EIF4E2 | hsa-miR-8069    |
| EIF4E2 | hsa-miR-7686-5p |
| EIF4E2 | hsa-miR-6928-3p |
| EIF4E2 | hsa-miR-7037-5p |
| EIF4E2 | hsa-miR-6947-3p |
| EIF4E2 | hsa-miR-767-5p  |
| EIF4E2 | hsa-miR-3613a   |
| EIF4E2 | hsa-miR-4803    |
| EIF4E2 | hsa-miR-2116-5p |
| EIF4E2 | hsa-miR-6403    |
| EIF4E2 | hsa-miR-1236-3p |
| EIF4E2 | hsa-miR-29      |
| EIF4E2 | hsa-miR-4520-5p |
| EIF4E2 | hsa-miR-1245a   |
| EIF4E2 | hsa-miR-1956-5p |
| EIF4E2 | hsa-miR-29a-3p  |
| EIF4E2 | hsa-miR-294-5p  |
| EIF4E2 | hsa-miR-7864    |
| EIF4E2 | hsa-miR-7480-5p |
| EIF4E2 | hsa-miR-4729    |
| EIF4E2 | hsa-miR-8875    |
| EIF4E2 | hsa-miR-543-5p  |
| EIF4E2 | hsa-miR-7173-5p |
| EIF4E2 | hsa-miR-1956    |

|        |                  |
|--------|------------------|
| EIF4E2 | hsa-miR-26b-3p   |
| EIF4E2 | hsa-miR-21-3p    |
| EIF4E2 | hsa-miR-4695-3p  |
| EIF4E2 | hsa-miR-1553-5p  |
| EIF4E2 | hsa-miR-1567     |
| EIF4E2 | hsa-miR-7646-5p  |
| EIF4E2 | hsa-miR-7365-3p  |
| EIF4E2 | hsa-miR-3662     |
| EIF4E2 | hsa-miR-6787-3p  |
| EIF4E2 | hsa-miR-22-5p    |
| EIF4E2 | hsa-miR-763      |
| EIF4E2 | hsa-miR-198      |
| EIF4E2 | hsa-miR-6398     |
| EIF4E2 | hsa-miR-29b-3p   |
| EIF4E2 | hsa-miR-6958-3p  |
| EIF4E2 | hsa-miR-4677-5p  |
| EIF4E2 | hsa-miR-627-3p   |
| EIF4E2 | hsa-miR-141-5p   |
| EIF4E2 | hsa-miR-7032-3p  |
| EIF4E2 | hsa-miR-6549-3p  |
| EIF4E3 | hsa-miR-19a-3p   |
| EIF4E3 | hsa-miR-4437     |
| EIF4E3 | hsa-miR-409      |
| EIF4E3 | hsa-miR-5697-5p  |
| EIF4E3 | hsa-miR-4691-3p  |
| EIF4E3 | hsa-miR-7659-5p  |
| EIF4E3 | hsa-miR-7398a-3p |
| EIF4E3 | hsa-miR-2450bd   |
| EIF4E3 | hsa-miR-8089     |
| EIF4E3 | hsa-miR-1744-5p  |
| EIF4E3 | hsa-miR-195-3p   |
| EIF4E3 | hsa-miR-216b-3p  |
| EIF4E3 | hsa-miR-4482-3p  |
| EIF4E3 | hsa-miR-548g-5p  |
| EIF4E3 | hsa-miR-377-3p   |
| EIF4E3 | hsa-miR-891b     |
| EIF4E3 | hsa-miR-3075     |
| EIF4E3 | hsa-miR-6740-5p  |
| EIF4E3 | hsa-miR-1252-5p  |
| EIF4E3 | hsa-miR-7308-5p  |
| EIF4E3 | hsa-miR-553      |
| EIF4E3 | hsa-miR-4700-5p  |
| EIF4E3 | hsa-miR-2284b    |
| EIF4E3 | hsa-miR-8099     |
| EIF4E3 | hsa-miR-6751-3p  |
| EIF4E3 | hsa-miR-7050-5p  |

|        |                  |
|--------|------------------|
| EIF4E3 | hsa-miR-455-5p   |
| EIF4E3 | hsa-miR-4261     |
| EIF4E3 | hsa-miR-3920     |
| EIF4E3 | hsa-miR-6384     |
| EIF4E3 | hsa-miR-3908     |
| EIF4E3 | hsa-let-7c-3p    |
| EIF4E3 | hsa-miR-525-5p   |
| EIF4E3 | hsa-miR-8826     |
| EIF4E3 | hsa-miR-6876-5p  |
| EIF4E3 | hsa-miR-3622a-3p |
| EIF4E3 | hsa-miR-608      |
| EIF4E3 | hsa-miR-548b-5p  |
| EIF4E3 | hsa-miR-18-5p    |
| EIF4E3 | hsa-miR-6508-3p  |
| EIF4E3 | hsa-miR-365a-3p  |
| EIF4E3 | hsa-miR-6779-5p  |
| EIF4E3 | hsa-miR-606      |
| EIF4E3 | hsa-miR-4524b-3p |
| EIF4E3 | hsa-miR-4526     |
| EIF4E3 | hsa-miR-7183-5p  |
| EIF4E3 | hsa-miR-548au-5p |
| EIF4E3 | hsa-miR-216-5p   |
| EIF4E3 | hsa-miR-1682     |
| EIF4E3 | hsa-miR-4308     |
| EIF4E3 | hsa-miR-1954     |
| EIF4E3 | hsa-miR-1178-3p  |
| EIF4E3 | hsa-miR-4637     |
| EIF4E3 | hsa-miR-3135b    |
| EIF4E3 | hsa-miR-103-2-5p |
| EIF4E3 | hsa-miR-1814a    |
| EIF4E3 | hsa-miR-6120-5p  |
| EIF4E3 | hsa-miR-448-5p   |
| EIF4E3 | hsa-miR-6372     |
| EIF4E3 | hsa-miR-204-5p   |
| EIF4E3 | hsa-miR-4472     |
| EIF4E3 | hsa-miR-6999-5p  |
| EIF4E3 | hsa-miR-654-3p   |
| EIF4E3 | hsa-miR-6871-5p  |
| EIF4E3 | hsa-miR-3144-3p  |
| EIF4E3 | hsa-miR-362-5p   |
| EIF4E3 | hsa-miR-7270-3p  |
| EIF4E3 | hsa-miR-7398d-3p |
| EIF4E3 | hsa-miR-3564     |
| EIF4E3 | hsa-miR-3122     |
| EIF4E3 | hsa-miR-7157-5p  |
| EIF4E3 | hsa-miR-5683     |



|        |                   |
|--------|-------------------|
| EIF4E3 | hsa-miR-7175-3p   |
| EIF4E3 | hsa-miR-16-1-3p   |
| EIF4E3 | hsa-miR-3533      |
| EIF4E3 | hsa-miR-1955-5p   |
| EIF4E3 | hsa-miR-2411-3p   |
| EIF4E3 | hsa-miR-211-5p    |
| EIF4E3 | hsa-miR-6801-3p   |
| EIF4E3 | hsa-miR-548ar-5p  |
| EIF4E3 | hsa-miR-548ah-5p  |
| EIF4E3 | hsa-miR-5190      |
| EIF4E3 | hsa-miR-1649-5p   |
| EIF4E3 | hsa-miR-7069-5p   |
| EIF4E3 | hsa-miR-224-3p    |
| EIF4E3 | hsa-miR-6845-3p   |
| EIF4E3 | hsa-miR-1934-3p   |
| EIF4E3 | hsa-miR-2459      |
| EIF4E3 | hsa-miR-365b-3p   |
| EIF4E3 | hsa-miR-7062-5p   |
| EIF4E3 | hsa-miR-6504-3p   |
| EIF4E3 | hsa-miR-378d      |
| EIF4E3 | hsa-miR-6324      |
| EIF4E3 | hsa-miR-2285      |
| EIF4E3 | hsa-miR-6757-5p   |
| EIF4E3 | hsa-miR-4480      |
| EIF4E3 | hsa-miR-2399-3p   |
| EIF4E3 | hsa-miR-29b-3p    |
| EIF4E3 | hsa-miR-7300-5p   |
| EIF4E3 | hsa-miR-219a-2-3p |
| EIF4E3 | hsa-miR-4454      |
| EIF4E3 | hsa-miR-1179      |
| EIF4E3 | hsa-miR-148       |
| EIF4E3 | hsa-miR-7058-5p   |
| EIF4E3 | hsa-miR-24-3p     |
| EIF4E3 | hsa-miR-599-3p    |
| EIF4E3 | hsa-miR-544-3p    |
| EIF4E3 | hsa-miR-290b-5p   |
| EIF4E3 | hsa-miR-7374c-3p  |
| EIF4E3 | hsa-miR-660-5p    |
| EIF4E3 | hsa-miR-3936      |
| EIF4E3 | hsa-miR-494       |
| EIF4E3 | hsa-miR-5696      |
| EIF4E3 | hsa-miR-6879-5p   |
| EIF4E3 | hsa-miR-24-5p     |
| EIF4E3 | hsa-miR-7237-5p   |
| EIF4E3 | hsa-miR-4460      |
| EIF4E3 | hsa-miR-6338      |

|        |                 |
|--------|-----------------|
| EIF4E3 | hsa-miR-1696    |
| EIF4E3 | hsa-miR-328-3p  |
| EIF4E3 | hsa-miR-4291    |
| EIF4E3 | hsa-miR-6886-3p |
| EIF4E3 | hsa-miR-4314    |
| EIF4E3 | hsa-miR-4752    |
| EIF4E3 | hsa-miR-2354    |
| EIF4E3 | hsa-miR-8085    |
| EIF4E3 | hsa-miR-22-5p   |
| EIF4E3 | hsa-miR-887     |
| EIF4E3 | hsa-miR-3562    |
| EIF4E3 | hsa-miR-6849-3p |
| EIF4E3 | hsa-miR-4280    |
| EIF4E3 | hsa-miR-339-5p  |
| EIF4E3 | hsa-miR-703     |
| EIF4E3 | hsa-miR-378-5p  |
| EIF4E3 | hsa-miR-7026-5p |
| EIF4E3 | hsa-miR-2285x   |
| EIF4E3 | hsa-miR-7337-5p |
| EIF4E3 | hsa-miR-3531-3p |
| EIF4E3 | hsa-miR-6976-3p |
| EIF4E3 | hsa-miR-7065-3p |
| EIF4E3 | hsa-miR-7359-3p |
| EIF4E3 | hsa-miR-8805    |
| EIF4E3 | hsa-miR-135-5p  |
| EIF4E3 | hsa-miR-616-3p  |
| EIF4E3 | hsa-miR-615-3p  |
| EIF4E3 | hsa-miR-2284r   |
| EIF4E3 | hsa-miR-6505-3p |
| EIF4E3 | hsa-miR-547-5p  |
| EIF4E3 | hsa-miR-4425    |
| EIF4E3 | hsa-miR-6398    |
| EIF4E3 | hsa-miR-6798-5p |
| EIF4E3 | hsa-miR-129-3p  |
| EIF4E3 | hsa-miR-1680-5p |
| EIF4E3 | hsa-miR-4799-3p |
| EIF4E3 | hsa-miR-5110    |
| EIF4E3 | hsa-miR-5571-5p |
| EIF4E3 | hsa-miR-128-5p  |
| EIF4E3 | hsa-miR-4705    |
| EIF4E3 | hsa-miR-556-5p  |
| EIF4E3 | hsa-miR-7156-3p |
| EIF4E3 | hsa-miR-302     |
| EIF4E3 | hsa-miR-7172-3p |
| EIF4E3 | hsa-miR-7116-3p |
| EIF4E3 | hsa-miR-6811-3p |

|        |                  |
|--------|------------------|
| EIF4E3 | hsa-miR-3928-3p  |
| EIF4E3 | hsa-miR-6973a-3p |
| EIF4E3 | hsa-miR-4686     |
| EIF4E3 | hsa-miR-1970     |
| EIF4E3 | hsa-miR-1949     |
| EIF4E3 | hsa-miR-25-5p    |
| EIF4E3 | hsa-miR-8086     |
| EIF4E3 | hsa-miR-802      |
| EIF4E3 | hsa-miR-4742-3p  |
| EIF4E3 | hsa-miR-873a-3p  |
| EIF4E3 | hsa-miR-5120     |
| EIF4E3 | hsa-let-7c-1-3p  |
| EIF4E3 | hsa-miR-130-3p   |
| EIF4E3 | hsa-miR-1296-3p  |
| EIF4E3 | hsa-miR-6929-5p  |
| EIF4E3 | hsa-miR-549a     |
| EIF4E3 | hsa-miR-7015-3p  |
| EIF4E3 | hsa-miR-487-5p   |
| EIF4E3 | hsa-miR-2479     |
| EIF4E3 | hsa-miR-298-5p   |
| EIF4E3 | hsa-miR-361-3p   |
| EIF4E3 | hsa-miR-1976     |
| EIF4E3 | hsa-let-7ag-3p   |
| EIF4E3 | hsa-miR-532-3p   |
| EIF4E3 | hsa-miR-7118-5p  |
| EIF4E3 | hsa-miR-7202-3p  |
| EIF4E3 | hsa-miR-30       |
| EIF4E3 | hsa-miR-513a-5p  |
| EIF4E3 | hsa-miR-329      |
| EIF4E3 | hsa-miR-1560-3p  |
| EIF4E3 | hsa-miR-4762-3p  |
| EIF4E3 | hsa-miR-3136-5p  |
| EIF4E3 | hsa-miR-424-5p   |
| EIF4E3 | hsa-miR-1915-3p  |
| EIF4E3 | hsa-miR-2452     |
| EIF4E3 | hsa-miR-2461-3p  |
| EIF4E3 | hsa-miR-3167-3p  |
| EIF4E3 | hsa-miR-187-5p   |
| EIF4E3 | hsa-miR-8844     |
| EIF4E3 | hsa-miR-875      |
| EIF4E3 | hsa-miR-197-3p   |
| EIF4E3 | hsa-miR-4292     |
| EIF4E3 | hsa-miR-374a-3p  |
| EIF4E3 | hsa-miR-210-5p   |
| EIF4E3 | hsa-miR-5128     |
| EIF4E3 | hsa-miR-423-5p   |

|        |                   |
|--------|-------------------|
| EIF4E3 | hsa-miR-7311-5p   |
| EIF4E3 | hsa-miR-1-3p      |
| EIF4E3 | hsa-miR-465abc-3p |
| EIF4E3 | hsa-miR-4650      |
| EIF4E3 | hsa-miR-8889      |
| EIF4E3 | hsa-miR-6393      |
| EIF4E3 | hsa-miR-129-2-3p  |
| EIF4E3 | hsa-miR-1197      |
| EIF4E3 | hsa-miR-4509      |
| EIF4E3 | hsa-miR-3681-5p   |
| EIF4E3 | hsa-miR-350       |
| EIF4E3 | hsa-miR-5125      |
| EIF4E3 | hsa-miR-8076      |
| EIF4E3 | hsa-miR-380-3p    |
| EIF4E3 | hsa-miR-7302-5p   |
| EIF4E3 | hsa-miR-217       |
| EIF4E3 | hsa-miR-345-5p    |
| EIF4E3 | hsa-miR-3557-3p   |
| EIF4E3 | hsa-miR-7252-3p   |
| EIF4E3 | hsa-miR-135a-1-3p |
| EIF4E3 | hsa-miR-2285g     |
| EIF4E3 | hsa-miR-7358-3p   |
| EIF4E3 | hsa-miR-7235-3p   |
| EIF4E3 | hsa-miR-520-3p    |
| EIF4E3 | hsa-miR-879-5p    |
| EIF4E3 | hsa-miR-590-5p    |
| EIF4E3 | hsa-miR-4796-5p   |
| EIF4E3 | hsa-miR-4647      |
| EIF4E3 | hsa-miR-7046-5p   |
| EIF4E3 | hsa-miR-204-3p    |
| EIF4E3 | hsa-miR-4287      |
| EIF4E3 | hsa-miR-5094      |
| EIF4E3 | hsa-miR-3686      |
| EIF4E3 | hsa-miR-3653-3p   |
| EIF4E3 | hsa-miR-23a-3p    |
| EIF4E3 | hsa-miR-2277-3p   |
| EIF4E3 | hsa-miR-2292      |
| EIF4E3 | hsa-miR-1238-3p   |
| EIF4E3 | hsa-miR-3074-5p   |
| EIF4E3 | hsa-miR-1264      |
| EIF4E3 | hsa-miR-29b-1-5p  |
| EIF4E3 | hsa-miR-493-5p    |
| EIF4E3 | hsa-miR-3613-3p   |
| EIF4E3 | hsa-miR-5697-3p   |
| EIF4E3 | hsa-miR-488-3p    |
| EIF4E3 | hsa-miR-7067-5p   |

|        |                  |
|--------|------------------|
| EIF4E3 | hsa-miR-345-3p   |
| EIF4E3 | hsa-miR-7249-3p  |
| EIF4E3 | hsa-miR-148b-3p  |
| EIF4E3 | hsa-miR-513a     |
| EIF4E3 | hsa-miR-6356     |
| EIF4E3 | hsa-miR-688      |
| EIF4E3 | hsa-miR-6715b-5p |
| EIF4E3 | hsa-miR-7330-5p  |
| EIF4E3 | hsa-miR-1574-5p  |
| EIF4E3 | hsa-miR-656-5p   |
| EIF4E3 | hsa-miR-342-3p   |
| EIF4E3 | hsa-miR-1246     |
| EIF4E3 | hsa-miR-3082-5p  |
| EIF4E3 | hsa-miR-449-3p   |
| EIF4E3 | hsa-miR-3141     |
| EIF4E3 | hsa-miR-1545a-3p |
| EIF4E3 | hsa-miR-486-5p   |
| EIF4E3 | hsa-miR-618      |
| EIF4E3 | hsa-miR-6481     |
| EIF4E3 | hsa-miR-2343     |
| EIF4E3 | hsa-miR-635      |
| EIF4E3 | hsa-miR-2284q    |
| EIF4E3 | hsa-miR-5132-3p  |
| EIF4E3 | hsa-miR-6380     |
| EIF4E3 | hsa-miR-6757-3p  |
| EIF4E3 | hsa-miR-450a     |
| EIF4E3 | hsa-miR-200c-3p  |
| EIF4E3 | hsa-miR-154-5p   |
| EIF4E3 | hsa-miR-1758     |
| EIF4E3 | hsa-miR-3154     |
| EIF4E3 | hsa-miR-1912-3p  |
| EIF4E3 | hsa-miR-6942-5p  |
| EIF4E3 | hsa-miR-5681b    |
| EIF4E3 | hsa-miR-7014-5p  |
| EIF4E3 | hsa-miR-3473be   |
| EIF4E3 | hsa-miR-506-5p   |
| EIF4E3 | hsa-miR-30--3p   |
| EIF4E3 | hsa-miR-2329-5p  |
| EIF4E3 | hsa-miR-197-5p   |
| EIF4E3 | hsa-miR-496b     |
| EIF4E3 | hsa-miR-660-5p   |
| EIF4E3 | hsa-miR-7048-3p  |
| EIF4E3 | hsa-miR-200c-3p  |
| EIF4E3 | hsa-miR-2483-3p  |
| EIF4E3 | hsa-miR-7385f-3p |
| EIF4E3 | hsa-miR-879-3p   |

|        |                  |
|--------|------------------|
| EIF4E3 | hsa-miR-2316     |
| EIF4E3 | hsa-miR-4301     |
| EIF4E3 | hsa-miR-625-5p   |
| EIF4E3 | hsa-miR-669p-3p  |
| EIF4E3 | hsa-miR-7178-5p  |
| EIF4E3 | hsa-miR-4735-5p  |
| EIF4E3 | hsa-miR-719      |
| EIF4E3 | hsa-miR-2395     |
| EIF4E3 | hsa-miR-3591-5p  |
| EIF4E3 | hsa-miR-3942-3p  |
| EIF4E3 | hsa-miR-669g     |
| EIF4E3 | hsa-miR-3573-5p  |
| EIF4E3 | hsa-miR-622      |
| EIF4E3 | hsa-miR-6918-3p  |
| EIF4E3 | hsa-miR-2394     |
| EIF4E3 | hsa-miR-8888     |
| EIF4E3 | hsa-miR-627-3p   |
| EIF4E3 | hsa-miR-297bc-3p |
| EIF4E3 | hsa-miR-527      |
| EIF4E3 | hsa-miR-6937-3p  |
| EIF4E3 | hsa-miR-2285j    |
| EIF4E3 | hsa-miR-548u     |
| EIF4E3 | hsa-miR-7194-5p  |
| EIF4E3 | hsa-miR-4514     |
| EIF4E3 | hsa-miR-6934-3p  |
| EIF4E3 | hsa-miR-548ap-3p |
| EIF4E3 | hsa-miR-7253-5p  |
| EIF4E3 | hsa-miR-1911-3p  |
| EIF4E3 | hsa-miR-544b     |
| EIF4E3 | hsa-miR-138-2-3p |
| EIF4E3 | hsa-miR-376c-5p  |
| EIF4E3 | hsa-miR-7369-5p  |
| EIF4E3 | hsa-miR-7386o-3p |
| EIF4E3 | hsa-miR-548ay-5p |
| EIF4E3 | hsa-miR-330-3p.2 |
| EIF4E3 | hsa-miR-548s     |
| EIF4E3 | hsa-miR-7349-3p  |
| EIF4E3 | hsa-miR-133      |
| EIF4E3 | hsa-miR-329-3p   |
| EIF4E3 | hsa-miR-7111-3p  |
| EIF4E3 | hsa-miR-30a-3p   |
| EIF4E3 | hsa-miR-292-3p   |
| EIF4E3 | hsa-miR-3938-5p  |
| EIF4E3 | hsa-miR-5703     |
| EIF4E3 | hsa-miR-7861     |
| EIF4E3 | hsa-miR-609      |

|        |                  |
|--------|------------------|
| EIF4E3 | hsa-miR-145-5p   |
| EIF4E3 | hsa-miR-6885-3p  |
| EIF4E3 | hsa-miR-7660-3p  |
| EIF4E3 | hsa-miR-6732-3p  |
| EIF4E3 | hsa-miR-6844     |
| EIF4E3 | hsa-miR-2957     |
| EIF4E3 | hsa-miR-1598     |
| EIF4E3 | hsa-miR-8886     |
| EIF4E3 | hsa-miR-3138     |
| EIF4E3 | hsa-miR-4692     |
| EIF4E3 | hsa-miR-8075     |
| EIF4E3 | hsa-miR-1243-3p  |
| EIF4E3 | hsa-miR-460b-5p  |
| EIF4E3 | hsa-miR-4713-3p  |
| EIF4E3 | hsa-miR-1608     |
| EIF4E3 | hsa-miR-7864     |
| EIF4E3 | hsa-miR-556-3p   |
| EIF4E3 | hsa-miR-6325     |
| EIF4E3 | hsa-miR-7223-5p  |
| EIF4E3 | hsa-miR-4311     |
| EIF4E3 | hsa-miR-1968-5p  |
| EIF4E3 | hsa-miR-429-3p   |
| EIF4E3 | hsa-miR-376ab    |
| EIF4E3 | hsa-miR-581      |
| EIF4E3 | hsa-miR-1258-5p  |
| EIF4E3 | hsa-miR-290a-5p  |
| EIF4E3 | hsa-miR-7386e-3p |
| EIF4E3 | hsa-miR-2297     |
| EIF4E3 | hsa-miR-2114-5p  |
| EIF4E3 | hsa-miR-515      |
| EIF4E3 | hsa-miR-2428     |
| EIF4E3 | hsa-miR-4753-3p  |
| EIF4E3 | hsa-miR-8816     |
| EIF4E3 | hsa-miR-2285aa   |
| EIF4E3 | hsa-miR-4799-5p  |
| EIF4E3 | hsa-miR-502-5p   |
| EIF4E3 | hsa-miR-7354-5p  |
| EIF4E3 | hsa-miR-6971-3p  |
| EIF4E3 | hsa-miR-3070-5p  |
| EIF4E3 | hsa-miR-2341     |
| EIF4E3 | hsa-miR-7110-3p  |
| EIF4E3 | hsa-miR-6988-5p  |
| EIF4E3 | hsa-miR-326-5p   |
| EIF4E3 | hsa-miR-1185-5p  |
| EIF4E3 | hsa-miR-701-3p   |
| EIF4E3 | hsa-miR-6778-5p  |

|        |                  |
|--------|------------------|
| EIF4E3 | hsa-miR-6969-5p  |
| EIF4E3 | hsa-miR-1244     |
| EIF4E3 | hsa-miR-7371e-5p |
| EIF4E3 | hsa-miR-7072-5p  |
| EIF4E3 | hsa-miR-891a     |
| EIF4E3 | hsa-miR-4758-3p  |
| EIF4E3 | hsa-miR-6976-5p  |
| EIF4E3 | hsa-miR-6656-5p  |
| EIF4E3 | hsa-miR-3102-5p  |
| EIF4E3 | hsa-miR-5003-3p  |
| EIF4E3 | hsa-miR-7673-3p  |
| EIF4E3 | hsa-let-7a-3p    |
| EIF4E3 | hsa-miR-6664-3p  |
| EIF4E3 | hsa-miR-543-3p   |
| EIF4E3 | hsa-miR-214-3p   |
| EIF4E3 | hsa-miR-548aq-3p |
| EIF4E3 | hsa-miR-7398h-3p |
| EIF4E3 | hsa-miR-6954-3p  |
| EIF4E3 | hsa-miR-6919-5p  |
| EIF4E3 | hsa-miR-593-3p   |
| EIF4E3 | hsa-miR-542-5p   |
| EIF4E3 | hsa-miR-532-5p   |
| EIF4E3 | hsa-miR-5693     |
| EIF4E3 | hsa-miR-6828-3p  |
| EIF4E3 | hsa-miR-6799-5p  |
| EIF4E3 | hsa-miR-4267     |
| EIF4E3 | hsa-miR-4297     |
| EIF4E3 | hsa-miR-883a-5p  |
| EIF4E3 | hsa-miR-203-3p.2 |
| EIF4E3 | hsa-miR-410-3p   |
| EIF4E3 | hsa-miR-2439-3p  |
| EIF4E3 | hsa-miR-638      |
| EIF4E3 | hsa-miR-4529-5p  |
| EIF4E3 | hsa-miR-7169-3p  |
| EIF4E3 | hsa-miR-7232-3p  |
| EIF4E3 | hsa-miR-103-5p   |
| EIF4E3 | hsa-miR-466f-3p  |
| EIF4E3 | hsa-miR-619-5p   |
| EIF4E3 | hsa-miR-4271     |
| EIF4E3 | hsa-miR-5699-3p  |
| EIF4E3 | hsa-miR-29b-2-5p |
| EIF4E3 | hsa-miR-4749-5p  |
| EIF4E3 | hsa-miR-6896-5p  |
| EIF4E3 | hsa-miR-2484     |
| EIF4E3 | hsa-miR-7224-5p  |
| EIF4E3 | hsa-miR-1271-3p  |



|        |                  |
|--------|------------------|
| EIF4E3 | hsa-miR-7g-3p    |
| EIF4E3 | hsa-miR-698-5p   |
| EIF4E3 | hsa-miR-3152-5p  |
| EIF4E3 | hsa-miR-3149     |
| EIF4E3 | hsa-miR-8818     |
| EIF4E3 | hsa-miR-570-3p   |
| EIF4E3 | hsa-miR-3109-3p  |
| EIF4E3 | hsa-miR-7371j-5p |
| EIF4E3 | hsa-miR-4433a-3p |
| EIF4E3 | hsa-miR-7119-5p  |
| EIF4E3 | hsa-miR-4733-3p  |
| EIF4E3 | hsa-miR-6766-5p  |
| EIF4E3 | hsa-miR-4664-5p  |
| EIF4E3 | hsa-miR-7237-3p  |
| EIF4E3 | hsa-miR-1261     |
| EIF4E3 | hsa-miR-124-3p   |
| EIF4E3 | hsa-miR-2351     |
| EIF4E3 | hsa-miR-23a-5p   |
| EIF4E3 | hsa-miR-382-3p   |
| EIF4E3 | hsa-miR-7b-3p    |
| EIF4E3 | hsa-miR-372-5p   |
| EIF4E3 | hsa-miR-7260-5p  |
| EIF4E3 | hsa-miR-301      |
| EIF4E3 | hsa-miR-4744     |
| EIF4E3 | hsa-miR-487a     |
| EIF4E3 | hsa-miR-4697-3p  |
| EIF4E3 | hsa-miR-182-5p   |
| EIF4E3 | hsa-miR-2370-3p  |
| EIF4E3 | hsa-miR-8087     |
| EIF4E3 | hsa-miR-495-3p   |
| EIF4E3 | hsa-miR-1250-3p  |
| EIF4E3 | hsa-miR-6764-5p  |
| EIF4E3 | hsa-miR-3150b-5p |
| EIF4E3 | hsa-miR-24-3p    |
| EIF4E3 | hsa-miR-7670-5p  |
| EIF4E3 | hsa-miR-3976     |
| EIF4E3 | hsa-miR-873-3p   |
| EIF4E3 | hsa-miR-8082     |
| EIF4E3 | hsa-miR-548c-3p  |
| EIF4E3 | hsa-miR-103      |
| EIF4E3 | hsa-miR-29-3p    |
| EIF4E3 | hsa-miR-101c     |
| EIF4E3 | hsa-miR-6215     |
| EIF4E3 | hsa-miR-607      |
| EIF4E3 | hsa-miR-1257     |
| EIF4E3 | hsa-miR-4677-5p  |

|        |                   |
|--------|-------------------|
| EIF4E3 | hsa-miR-4303      |
| EIF4E3 | hsa-miR-3966      |
| EIF4E3 | hsa-miR-223-3p    |
| EIF4E3 | hsa-miR-297       |
| EIF4E3 | hsa-miR-7482-3p   |
| EIF4E3 | hsa-miR-7323-3p   |
| EIF4E3 | hsa-miR-889       |
| EIF4E3 | hsa-miR-124       |
| EIF4E3 | hsa-miR-203-3p    |
| EIF4E3 | hsa-miR-508a      |
| EIF4E3 | hsa-miR-496a-3p.2 |
| EIF4E3 | hsa-miR-3660      |
| EIF4E3 | hsa-miR-598-3p    |
| EIF4E3 | hsa-miR-6794-5p   |
| EIF4E3 | hsa-miR-7334-3p   |
| EIF4E3 | hsa-miR-29-5p     |
| EIF4E3 | hsa-miR-296-5p    |
| EIF4E3 | hsa-miR-6959-5p   |
| EIF4E3 | hsa-miR-4709-5p   |
| EIF4E3 | hsa-miR-7207-5p   |
| EIF4E3 | hsa-miR-3113-3p   |
| EIF4E3 | hsa-miR-6346      |
| EIF4E3 | hsa-miR-21-5p     |
| EIF4E3 | hsa-miR-7854-3p   |
| EIF4E3 | hsa-miR-5089-5p   |
| EIF4E3 | hsa-miR-4632-5p   |
| EIF4E3 | hsa-miR-6897-5p   |
| EIF4E3 | hsa-miR-300-3p    |
| EIF4E3 | hsa-miR-2285e     |
| EIF4E3 | hsa-miR-2369      |
| EIF4E3 | hsa-miR-7653-5p   |
| EIF4E3 | hsa-miR-2363      |
| EIF4E3 | hsa-miR-493       |
| EIF4E3 | hsa-miR-7190-5p   |
| EIF4E3 | hsa-miR-455-5p    |
| EIF4E3 | hsa-miR-8107      |
| EIF4E3 | hsa-miR-4455      |
| EIF4E3 | hsa-miR-6884-3p   |
| EIF4E3 | hsa-miR-5692bc    |
| EIF4E3 | hsa-miR-343       |
| EIF4E3 | hsa-miR-6816-3p   |
| EIF4E3 | hsa-miR-323b-5p   |
| EIF4E3 | hsa-miR-3910      |
| EIF4E3 | hsa-miR-7652-3p   |
| EIF4E3 | hsa-miR-669m-5p   |
| EIF4E3 | hsa-miR-7183-3p   |

|        |                  |
|--------|------------------|
| EIF4E3 | hsa-miR-466i-3p  |
| EIF4E3 | hsa-miR-7658-3p  |
| EIF4E3 | hsa-miR-7035-3p  |
| EIF4E3 | hsa-miR-570-3p   |
| EIF4E3 | hsa-miR-6821-3p  |
| EIF4E3 | hsa-miR-6916-5p  |
| EIF4E3 | hsa-miR-540-3p   |
| EIF4E3 | hsa-miR-7381-3p  |
| EIF4E3 | hsa-miR-708-3p   |
| EIF4E3 | hsa-miR-2052     |
| EIF4E3 | hsa-miR-372-3p   |
| EIF4E3 | hsa-miR-6957-5p  |
| EIF4E3 | hsa-miR-487a-3p  |
| EIF4E3 | hsa-miR-4699-3p  |
| EIF4E3 | hsa-miR-7350-3p  |
| EIF4E3 | hsa-miR-702-3p   |
| EIF4E3 | hsa-miR-650abc   |
| EIF4E3 | hsa-miR-7360-3p  |
| EIF4E3 | hsa-miR-302b-5p  |
| EIF4E3 | hsa-miR-7341-5p  |
| EIF4E3 | hsa-miR-7085-5p  |
| EIF4E3 | hsa-miR-1590     |
| EIF4E3 | hsa-miR-217-5p   |
| EIF4E3 | hsa-miR-691      |
| EIF4E3 | hsa-miR-6743-5p  |
| EIF4E3 | hsa-miR-1193     |
| EIF4E3 | hsa-miR-548j-3p  |
| EIF4E3 | hsa-miR-7024-5p  |
| EIF4E3 | hsa-miR-646      |
| EIF4E3 | hsa-miR-874-5p   |
| EIF4E3 | hsa-miR-7682-3p  |
| EIF4E3 | hsa-miR-8092     |
| EIF4E3 | hsa-miR-6374     |
| EIF4E3 | hsa-miR-548az-3p |
| EIF4E3 | hsa-miR-8116     |
| EIF4E3 | hsa-miR-548ai    |
| EIF4E3 | hsa-miR-7287-5p  |
| EIF4E3 | hsa-miR-330-5p   |
| EIF4E3 | hsa-miR-3121-3p  |
| EIF4E3 | hsa-miR-1960     |
| EIF4E3 | hsa-miR-660-3p   |
| EIF4E3 | hsa-miR-6852-5p  |
| EIF4E3 | hsa-miR-4666a-3p |
| EIF4E3 | hsa-miR-7249-5p  |
| EIF4E3 | hsa-miR-4259     |
| EIF4E3 | hsa-miR-6906-3p  |

|        |                  |
|--------|------------------|
| EIF4E3 | hsa-miR-6842-5p  |
| EIF4E3 | hsa-miR-4502     |
| EIF4E3 | hsa-miR-1258     |
| EIF4E3 | hsa-miR-6722-3p  |
| EIF4E3 | hsa-miR-6781-3p  |
| EIF4E3 | hsa-miR-8838     |
| EIF4E3 | hsa-miR-152-3p   |
| EIF4E3 | hsa-miR-2284l    |
| EIF4E3 | hsa-miR-507      |
| EIF4E3 | hsa-miR-555      |
| EIF4E3 | hsa-miR-6735-5p  |
| EIF4E3 | hsa-miR-567      |
| EIF4E3 | hsa-miR-1578     |
| EIF4E3 | hsa-miR-5134-5p  |
| EIF4E3 | hsa-miR-7068-5p  |
| EIF4E3 | hsa-miR-6705-5p  |
| EIF4E3 | hsa-miR-344b-3p  |
| EIF4E3 | hsa-miR-6840-3p  |
| EIF4E3 | hsa-miR-2377     |
| EIF4E3 | hsa-miR-26-5p    |
| EIF4E3 | hsa-miR-142-3p   |
| EIF4E3 | hsa-miR-6330     |
| EIF4E3 | hsa-miR-133a-5p  |
| EIF4E3 | hsa-miR-548ah-3p |
| EIF4E3 | hsa-miR-1237-3p  |
| EIF4E3 | hsa-miR-4665-5p  |
| EIF4E3 | hsa-miR-325-5p   |
| EIF4E3 | hsa-miR-548t-3p  |
| EIF4E3 | hsa-miR-8814     |
| EIF4E3 | hsa-miR-3150a-5p |
| EIF4E3 | hsa-miR-520g-3p  |
| EIF4E3 | hsa-miR-4639-3p  |
| EIF4E3 | hsa-miR-204-5p   |
| EIF4E3 | hsa-miR-7398u-3p |
| EIF4E3 | hsa-miR-3602     |
| EIF4E3 | hsa-miR-7024-3p  |
| EIF4E3 | hsa-miR-199      |
| EIF4E3 | hsa-miR-7389-3p  |
| EIF4E3 | hsa-miR-2284y    |
| EIF4E3 | hsa-miR-619      |
| EIF4E3 | hsa-miR-1841     |
| EIF4E3 | hsa-miR-218-5p   |
| EIF4E3 | hsa-miR-6911-5p  |
| EIF4E3 | hsa-miR-8823     |
| EIF4E3 | hsa-miR-6732-5p  |
| EIF4E3 | hsa-miR-7212-5p  |

|        |                   |
|--------|-------------------|
| EIF4E3 | hsa-miR-491-3p    |
| EIF4E3 | hsa-miR-7215-3p   |
| EIF4E3 | hsa-miR-2310      |
| EIF4E3 | hsa-miR-6526      |
| EIF4E3 | hsa-miR-98-3p     |
| EIF4E3 | hsa-miR-2414      |
| EIF4E3 | hsa-miR-632       |
| EIF4E3 | hsa-miR-3174      |
| EIF4E3 | hsa-miR-6983-5p   |
| EIF4E3 | hsa-miR-7378-3p   |
| EIF4E3 | hsa-miR-216b-5p   |
| EIF4E3 | hsa-miR-2446      |
| EIF4E3 | hsa-miR-330-3p    |
| EIF4E3 | hsa-miR-1668      |
| EIF4E3 | hsa-miR-4643      |
| EIF4E3 | hsa-miR-4277      |
| EIF4E3 | hsa-miR-2376      |
| EIF4E3 | hsa-miR-140-5p    |
| EIF4E3 | hsa-miR-6808-3p   |
| EIF4E3 | hsa-miR-19-5p     |
| EIF4E3 | hsa-miR-8891      |
| EIF4E3 | hsa-miR-7216-3p   |
| EIF4E3 | hsa-miR-6812-5p   |
| EIF4E3 | hsa-miR-7219-5p   |
| EIF4E3 | hsa-miR-7047-5p   |
| EIF4E3 | hsa-miR-4430      |
| EIF4E3 | hsa-miR-3614-3p   |
| EIF4E3 | hsa-miR-543-5p    |
| EIF4E3 | hsa-miR-7199-3p   |
| EIF4E3 | hsa-miR-7070-5p   |
| EIF4E3 | hsa-miR-655       |
| EIF4E3 | hsa-miR-1712-3p   |
| EIF4E3 | hsa-miR-653-5p    |
| EIF4E3 | hsa-miR-7845-5p   |
| EIF4E3 | hsa-miR-574-3p    |
| EIF4E3 | hsa-miR-6354      |
| EIF4E3 | hsa-miR-6867-3p   |
| EIF4E3 | hsa-miR-518       |
| EIF4E3 | hsa-miR-4511      |
| EIF4E3 | hsa-miR-483-3p.1  |
| EIF4E3 | hsa-miR-6792-5p   |
| EIF4E3 | hsa-miR-7059-5p   |
| EIF4E3 | hsa-miR-2301      |
| EIF4E3 | hsa-miR-218a-1-3p |
| EIF4E3 | hsa-miR-520       |
| EIF4E3 | hsa-miR-5626-5p   |

|        |                  |
|--------|------------------|
| EIF4E3 | hsa-miR-328      |
| EIF4E3 | hsa-miR-7282-5p  |
| EIF4E3 | hsa-miR-6730-3p  |
| EIF4E3 | hsa-miR-190a-3p  |
| EIF4E3 | hsa-miR-4777-5p  |
| EIF4E3 | hsa-miR-3620-3p  |
| EIF4E3 | hsa-miR-6891-5p  |
| EIF4E3 | hsa-miR-1619     |
| EIF4E3 | hsa-miR-92a-5p   |
| EIF4E3 | hsa-miR-7245-5p  |
| EIF4E3 | hsa-miR-6930-3p  |
| EIF4E3 | hsa-miR-7398r-3p |
| EIF4E3 | hsa-miR-5695     |
| EIF4E3 | hsa-miR-411-5p.2 |
| EIF4E3 | hsa-miR-5002-3p  |
| EIF4E3 | hsa-miR-155-5p   |
| EIF4E3 | hsa-miR-504      |
| EIF4E3 | hsa-miR-4696     |
| EIF4E3 | hsa-miR-1966-5p  |
| EIF4E3 | hsa-miR-4469     |
| EIF4E3 | hsa-miR-942-5p   |
| EIF4E3 | hsa-miR-3140-3p  |
| EIF4E3 | hsa-miR-6998-3p  |
| EIF4E3 | hsa-miR-7296-5p  |
| EIF4E3 | hsa-miR-96-3p    |
| EIF4E3 | hsa-miR-291-3p   |
| EIF4E3 | hsa-miR-7340-3p  |
| EIF4E3 | hsa-miR-802-3p   |
| EIF4E3 | hsa-miR-8060     |
| EIF4E3 | hsa-miR-1191a    |
| EIF4E3 | hsa-miR-337-3p   |
| EIF4E3 | hsa-miR-4669     |
| EIF4E3 | hsa-miR-629-3p   |
| EIF4E3 | hsa-miR-6990-3p  |
| EIF4E3 | hsa-miR-7385e-3p |
| EIF4E3 | hsa-miR-3144-5p  |
| EIF4E3 | hsa-miR-664a-3p  |
| EIF4E3 | hsa-miR-1264-5p  |
| EIF4E3 | hsa-miR-190-5p   |
| EIF4E3 | hsa-miR-7280-5p  |
| EIF4E3 | hsa-miR-2276-3p  |
| EIF4E3 | hsa-miR-512      |
| EIF4E3 | hsa-miR-5132-5p  |
| EIF4E3 | hsa-miR-8837     |
| EIF4E3 | hsa-miR-27b-5p   |
| EIF4E3 | hsa-miR-3202     |

|        |                  |
|--------|------------------|
| EIF4E3 | hsa-miR-5003-5p  |
| EIF4E3 | hsa-miR-2284g    |
| EIF4E3 | hsa-miR-509-5p   |
| EIF4E3 | hsa-miR-3068-3p  |
| EIF4E3 | hsa-miR-3589     |
| EIF4E3 | hsa-miR-3146     |
| EIF4E3 | hsa-miR-6788-5p  |
| EIF4E3 | hsa-miR-195-5p   |
| EIF4E3 | hsa-miR-2889     |
| EIF4E3 | hsa-miR-212-3p   |
| EIF4E3 | hsa-miR-122      |
| EIF4E3 | hsa-miR-3524-3p  |
| EIF4E3 | hsa-miR-6951-5p  |
| EIF4E3 | hsa-miR-669i     |
| EIF4E3 | hsa-miR-6800-5p  |
| EIF4E3 | hsa-miR-7371e-3p |
| EIF4E3 | hsa-miR-351-3p   |
| EIF4E3 | hsa-miR-1814     |
| EIF4E3 | hsa-miR-7843-3p  |
| EIF4E3 | hsa-miR-6509-3p  |
| EIF4E3 | hsa-miR-299      |
| EIF4E3 | hsa-miR-3153     |
| EIF4E3 | hsa-miR-6321     |
| EIF4E3 | hsa-miR-3614-5p  |
| EIF4E3 | hsa-miR-8862     |
| EIF4E3 | hsa-miR-2444     |
| EIF4E3 | hsa-miR-2284-5p  |
| EIF4E3 | hsa-miR-8902     |
| EIF4E3 | hsa-miR-3189-5p  |
| EIF4E3 | hsa-miR-7116-5p  |
| EIF4E3 | hsa-miR-7059-3p  |
| EIF4E3 | hsa-miR-7375-5p  |
| EIF4E3 | hsa-miR-8113     |
| EIF4E3 | hsa-miR-182-5p   |
| EIF4E3 | hsa-miR-7374b-3p |
| EIF4E3 | hsa-miR-7118-3p  |
| EIF4E3 | hsa-miR-550      |
| EIF4E3 | hsa-miR-3909     |
| EIF4E3 | hsa-miR-371b-5p  |
| EIF4E3 | hsa-miR-3167-5p  |
| EIF4E3 | hsa-miR-7042-5p  |
| EIF4E3 | hsa-miR-6946-5p  |
| EIF4E3 | hsa-miR-2396     |
| EIF4E3 | hsa-miR-374c-5p  |
| EIF4E3 | hsa-miR-548at-5p |
| EIF4E3 | hsa-miR-7053-3p  |

|        |                   |
|--------|-------------------|
| EIF4E3 | hsa-miR-2371      |
| EIF4E3 | hsa-miR-4278      |
| EIF4E3 | hsa-miR-3085      |
| EIF4E3 | hsa-miR-669c-3p   |
| EIF4E3 | hsa-miR-624-3p    |
| EIF4E3 | hsa-miR-29c-3p    |
| EIF4E3 | hsa-miR-216-3p    |
| EIF4E3 | hsa-miR-6665-5p   |
| EIF4E3 | hsa-miR-664-5p    |
| EIF4E3 | hsa-miR-6963-3p   |
| EIF4E3 | hsa-miR-7005-3p   |
| EIF4E3 | hsa-miR-466l-5p   |
| EIF4E3 | hsa-miR-548az-5p  |
| EIF4E3 | hsa-miR-4674      |
| EIF4E3 | hsa-miR-141-3p    |
| EIF4E3 | hsa-miR-4506      |
| EIF4E3 | hsa-miR-208-3p    |
| EIF4E3 | hsa-miR-4484      |
| EIF4E3 | hsa-miR-2136      |
| EIF4E3 | hsa-miR-323b-5p   |
| EIF4E3 | hsa-miR-7386h-3p  |
| EIF4E3 | hsa-miR-3058-5p   |
| EIF4E3 | hsa-miR-1283      |
| EIF4E3 | hsa-miR-6130      |
| EIF4E3 | hsa-miR-466bcp-3p |
| EIF4E3 | hsa-miR-3062-3p   |
| EIF4E3 | hsa-miR-3125      |
| EIF4E3 | hsa-miR-3658      |
| EIF4E3 | hsa-miR-338-3p    |
| EIF4E3 | hsa-miR-1282      |
| EIF4E3 | hsa-miR-3098-3p   |
| EIF4E3 | hsa-miR-185-5p    |
| EIF4E3 | hsa-miR-8849      |
| EIF4E3 | hsa-miR-7303-5p   |
| EIF4E3 | hsa-miR-1909-5p   |
| EIF4E3 | hsa-miR-1953      |
| EIF4E3 | hsa-miR-548x-3p   |
| EIF4E3 | hsa-miR-4528      |
| EIF4E3 | hsa-miR-7264-3p   |
| EIF4E3 | hsa-miR-3078-5p   |
| EIF4E3 | hsa-miR-3682-5p   |
| EIF4E3 | hsa-miR-1260a     |
| EIF4E3 | hsa-miR-6348      |
| EIF4E3 | hsa-miR-7338-5p   |
| EIF4E3 | hsa-miR-548av-3p  |
| EIF4E3 | hsa-miR-7007-5p   |



|        |                      |
|--------|----------------------|
| EIF4E3 | hsa-miR-2305         |
| EIF4E3 | hsa-miR-1564-5p      |
| EIF4E3 | hsa-miR-2355-5p      |
| EIF4E3 | hsa-miR-3096-5p      |
| EIF4E3 | hsa-miR-1896         |
| EIF4E3 | hsa-miR-1178-3p      |
| EIF4E3 | hsa-miR-7472-5p      |
| EIF4E3 | hsa-miR-6873-3p      |
| EIF4E3 | hsa-miR-6870-5p      |
| EIF4E3 | hsa-miR-765          |
| EIF4E3 | hsa-miR-6792-3p      |
| EIF4E3 | hsa-miR-708-5p       |
| EIF4E3 | hsa-miR-3110-5p      |
| EIF4E3 | hsa-miR-7277-3p      |
| EIF4E3 | hsa-miR-4482-5p      |
| EIF4E3 | hsa-miR-3551-5p      |
| EIF4E3 | hsa-miR-7388a-3p     |
| EIF4E3 | hsa-miR-1599         |
| EIF4E3 | hsa-miR-3102-3p.2-3p |
| EIF4E3 | hsa-miR-1931         |
| EIF4E3 | hsa-miR-153-5p       |
| EIF4E3 | hsa-miR-6965-5p      |
| EIF4E3 | hsa-miR-499          |
| EIF4E3 | hsa-miR-20-3p        |
| EIF4E3 | hsa-miR-7349-5p      |
| EIF4E3 | hsa-miR-627          |
| EIF4E3 | hsa-miR-592          |
| EIF4E3 | hsa-miR-98-5p        |
| EIF4E3 | hsa-miR-2401         |
| EIF4E3 | hsa-miR-2390         |
| EIF4E3 | hsa-miR-7301-3p      |
| EIF4E3 | hsa-miR-203a-3p.1    |
| EIF4E3 | hsa-miR-3064-3p      |
| EIF4E3 | hsa-miR-7119-3p      |
| EIF4E3 | hsa-miR-942          |
| EIF4E3 | hsa-miR-4520-3p      |
| EIF4E3 | hsa-miR-2285h        |
| EIF4E3 | hsa-miR-1807         |
| EIF4E3 | hsa-miR-107          |
| EIF4E3 | hsa-miR-4743-3p      |
| EIF4E3 | hsa-miR-7314-5p      |
| EIF4E3 | hsa-miR-6505-5p      |
| EIF4E3 | hsa-miR-9b-3p        |
| EIF4E3 | hsa-miR-3925-5p      |
| EIF4E3 | hsa-miR-3173-3p      |
| EIF4E3 | hsa-miR-550a-5p      |

|        |                   |
|--------|-------------------|
| EIF4E3 | hsa-miR-29a-3p    |
| EIF4E3 | hsa-miR-5625-3p   |
| EIF4E3 | hsa-miR-294-5p    |
| EIF4E3 | hsa-miR-490-3p    |
| EIF4E3 | hsa-miR-4697-5p   |
| EIF4E3 | hsa-miR-770-3p    |
| EIF4E3 | hsa-miR-1197-5p   |
| EIF4E3 | hsa-miR-503-5p    |
| EIF4E3 | hsa-miR-6510-5p   |
| EIF4E3 | hsa-miR-1942      |
| EIF4E3 | hsa-miR-224-5p    |
| EIF4E3 | hsa-miR-4766-5p   |
| EIF4E3 | hsa-miR-4771      |
| EIF4E3 | hsa-miR-592-5p    |
| EIF4E3 | hsa-miR-219b-3p   |
| EIF4E3 | hsa-miR-7373b-3p  |
| EIF4E3 | hsa-miR-764-3p    |
| EIF4E3 | hsa-miR-513c-5p   |
| EIF4E3 | hsa-miR-4723-3p   |
| EIF4E3 | hsa-miR-3592      |
| EIF4E3 | hsa-miR-4724-5p   |
| EIF4E3 | hsa-miR-331-5p    |
| EIF4E3 | hsa-miR-4276      |
| EIF4E3 | hsa-miR-743ab-3p  |
| EIF4E3 | hsa-miR-291b-3p   |
| EIF4E3 | hsa-miR-7263-3p   |
| EIF4E3 | hsa-miR-7680-3p   |
| EIF4E3 | hsa-miR-145-3p    |
| EIF4E3 | hsa-miR-3594-3p   |
| EIF4E3 | hsa-miR-6511-3p   |
| EIF4E3 | hsa-miR-584-5p    |
| EIF4E3 | hsa-miR-7112-3p   |
| EIF4E3 | hsa-miR-3061-5p   |
| EIF4E3 | hsa-miR-1231-5p   |
| EIF4E3 | hsa-miR-27a-5p    |
| EIF4E3 | hsa-miR-7650-3p   |
| EIF4E3 | hsa-miR-145a-3p   |
| EIF4E3 | hsa-miR-7193-5p   |
| EIF4E3 | hsa-miR-495-3p    |
| EIF4E3 | hsa-miR-412       |
| EIF4E3 | hsa-miR-216       |
| EIF4E3 | hsa-miR-873a-5p.2 |
| EIF4E3 | hsa-miR-587       |
| EIF4E3 | hsa-miR-548j-5p   |
| EIF4E3 | hsa-miR-4654      |
| EIF4E3 | hsa-miR-378a-5p   |

|        |                  |
|--------|------------------|
| EIF4E3 | hsa-miR-449c-5p  |
| EIF4E3 | hsa-miR-6748-3p  |
| EIF4E3 | hsa-miR-4263     |
| EIF4E3 | hsa-miR-548b-3p  |
| EIF4E3 | hsa-miR-1301-3p  |
| EIF4E3 | hsa-miR-301b-5p  |
| EIF4E3 | hsa-miR-7355-5p  |
| EIF4E3 | hsa-miR-1305     |
| EIF4E3 | hsa-miR-1933-5p  |
| EIF4E3 | hsa-miR-6754-5p  |
| EIF4E3 | hsa-miR-21-3p    |
| EIF4E3 | hsa-miR-203b-5p  |
| EIF4E3 | hsa-miR-7221-5p  |
| EIF4E3 | hsa-miR-1262-3p  |
| EIF4E3 | hsa-miR-6605-5p  |
| EIF4E3 | hsa-miR-6561-3p  |
| EIF4E3 | hsa-miR-7090-5p  |
| EIF4E3 | hsa-miR-5194     |
| EIF4E3 | hsa-miR-548i-3p  |
| EIF4E3 | hsa-miR-7323-5p  |
| EIF4E3 | hsa-miR-33-5p    |
| EIF4E3 | hsa-miR-7279-5p  |
| EIF4E3 | hsa-miR-887-5p   |
| EIF4E3 | hsa-miR-344i     |
| EIF4E3 | hsa-miR-375-3p   |
| EIF4E3 | hsa-miR-3646     |
| EIF4E3 | hsa-miR-548aa    |
| EIF4E3 | hsa-miR-372      |
| EIF4E3 | hsa-miR-6080     |
| EIF4E3 | hsa-miR-579-3p   |
| EIF4E3 | hsa-miR-4445-3p  |
| EIF4E3 | hsa-miR-5098     |
| EIF4E3 | hsa-miR-211-5p   |
| EIF4E3 | hsa-miR-6774-5p  |
| EIF4E3 | hsa-miR-295-5p   |
| EIF4E3 | hsa-miR-7366-3p  |
| EIF4E3 | hsa-miR-934-3p   |
| EIF4E3 | hsa-miR-424-3p   |
| EIF4E3 | hsa-miR-7231-3p  |
| EIF4E3 | hsa-miR-301a-3p  |
| EIF4E3 | hsa-miR-7265-5p  |
| EIF4E3 | hsa-miR-4679     |
| EIF4E3 | hsa-miR-2285q    |
| EIF4E3 | hsa-miR-140-3p.2 |
| EIF4E3 | hsa-miR-5700     |
| EIF4E3 | hsa-miR-2285b    |

|        |                  |
|--------|------------------|
| EIF4E3 | hsa-miR-323      |
| EIF4E3 | hsa-miR-4264     |
| EIF4E3 | hsa-miR-8809     |
| EIF4E3 | hsa-miR-888-5p   |
| EIF4E3 | hsa-miR-8807     |
| EIF4E3 | hsa-miR-7351-5p  |
| EIF4E3 | hsa-miR-4270     |
| EIF4E3 | hsa-miR-152-5p   |
| EIF4E3 | hsa-miR-4439     |
| EIF4E3 | hsa-miR-8485     |
| EIF4E3 | hsa-miR-6715-5p  |
| EIF4E3 | hsa-miR-3191-3p  |
| EIF4E3 | hsa-miR-663a     |
| EIF4E3 | hsa-miR-2285ad   |
| EIF4E3 | hsa-miR-1-5p     |
| EIF4E3 | hsa-miR-652-5p   |
| EIF4E3 | hsa-miR-7688-3p  |
| EIF4E3 | hsa-miR-1255a    |
| EIF4E3 | hsa-miR-3556a    |
| EIF4E3 | hsa-miR-7019-5p  |
| EIF4E3 | hsa-miR-7328-3p  |
| EIF4E3 | hsa-miR-6952-5p  |
| EIF4E3 | hsa-miR-4659a-5p |
| EIF4E3 | hsa-miR-30b-3p   |
| EIF4E3 | hsa-miR-1193-5p  |
| EIF4E3 | hsa-miR-141-5p   |
| EIF4E3 | hsa-miR-7161-5p  |
| EIF4E3 | hsa-miR-320a     |
| EIF4E3 | hsa-miR-2434     |
| EIF4E3 | hsa-miR-548c-3p  |
| EIF4E3 | hsa-miR-154b     |
| EIF4E3 | hsa-miR-1454     |
| EIF4E3 | hsa-miR-2426     |
| EIF4E3 | hsa-miR-588      |
| EIF4E3 | hsa-miR-671-5p   |
| EIF4E3 | hsa-miR-433      |
| EIF4E3 | hsa-miR-92b-5p   |
| EIF4E3 | hsa-miR-4667-5p  |
| EIF4E3 | hsa-miR-4325     |
| EIF4E3 | hsa-miR-138-5p   |
| EIF4E3 | hsa-miR-4670-3p  |
| EIF4E3 | hsa-miR-4796-3p  |
| EIF4E3 | hsa-miR-6903-3p  |
| EIF4E3 | hsa-miR-99-3p    |
| EIF4E3 | hsa-miR-5089-3p  |
| EIF4E3 | hsa-miR-6948-3p  |

|        |                   |
|--------|-------------------|
| EIF4E3 | hsa-miR-214-5p    |
| EIF4E3 | hsa-miR-1709      |
| EIF4E3 | hsa-miR-6531      |
| EIF4E3 | hsa-miR-181b-3p   |
| EIF4E3 | hsa-miR-7049-5p   |
| EIF4E3 | hsa-miR-7679-3p   |
| EIF4E3 | hsa-miR-6938-3p   |
| EIF4E3 | hsa-miR-3657      |
| EIF4E3 | hsa-miR-6919-3p   |
| EIF4E3 | hsa-miR-8881      |
| EIF4E3 | hsa-miR-6347      |
| EIF4E3 | hsa-miR-548ad-3p  |
| EIF4E3 | hsa-miR-101b-3p.1 |
| EIF4E3 | hsa-miR-873-5p    |
| EIF4E3 | hsa-miR-6514-3p   |
| EIF4E3 | hsa-miR-4717-5p   |
| EIF4E3 | hsa-miR-3575      |
| EIF4E3 | hsa-miR-8840      |
| EIF4E3 | hsa-miR-6685-5p   |
| EIF4E3 | hsa-miR-6861-5p   |
| EIF4E3 | hsa-miR-7386b-3p  |
| EIF4E3 | hsa-miR-4524-5p   |
| EIF4E3 | hsa-miR-8810      |
| EIF4E3 | hsa-miR-1982-5p   |
| EIF4E3 | hsa-miR-3544-3p   |
| EIF4E3 | hsa-miR-7976      |
| EIF4E3 | hsa-miR-1943-3p   |
| EIF4E3 | hsa-miR-664-3p    |
| EIF4E3 | hsa-miR-8908-5p   |
| EIF4E3 | hsa-miR-764-5p    |
| EIF4E3 | hsa-miR-7216-5p   |
| EIF4E3 | hsa-miR-1239      |
| EIF4E3 | hsa-miR-181d-3p   |
| EIF4E3 | hsa-miR-7113-5p   |
| EIF4E3 | hsa-miR-6847-5p   |
| EIF4E3 | hsa-miR-504-5p.1  |
| EIF4E3 | hsa-let-7f-2-3p   |
| EIF4E3 | hsa-miR-6124      |
| EIF4E3 | hsa-miR-515-5p    |
| EIF4E3 | hsa-miR-1470      |
| EIF4E3 | hsa-miR-543       |
| EIF4E3 | hsa-miR-939-3p    |
| EIF4E3 | hsa-miR-7281-5p   |
| EIF4E3 | hsa-miR-548aef    |
| EIF4E3 | hsa-miR-548at-3p  |
| EIF4E3 | hsa-miR-293-5p    |

|        |                   |
|--------|-------------------|
| EIF4E3 | hsa-miR-7214-3p   |
| EIF4E3 | hsa-miR-653-3p    |
| EIF4E3 | hsa-miR-589-5p    |
| EIF4E3 | hsa-miR-7246-3p   |
| EIF4E3 | hsa-miR-3084-3p   |
| EIF4E3 | hsa-miR-4517      |
| EIF4E3 | hsa-miR-4419b     |
| EIF4E3 | hsa-miR-758-3p    |
| EIF4E3 | hsa-miR-7011-5p   |
| EIF4E3 | hsa-miR-767-5p    |
| EIF4E3 | hsa-miR-6899-5p   |
| EIF4E3 | hsa-miR-568       |
| EIF4E3 | hsa-miR-3156-3p   |
| EIF4E3 | hsa-miR-3099-5p   |
| EIF4E3 | hsa-miR-135a-2-3p |
| EIF4E3 | hsa-miR-339-5p    |
| EIF4E3 | hsa-miR-3120-3p   |
| EIF4E3 | hsa-miR-6696-5p   |
| EIF4E3 | hsa-miR-205-3p    |
| EIF4E3 | hsa-miR-1687-5p   |
| EIF4E3 | hsa-miR-6537-5p   |
| EIF4E3 | hsa-miR-130b-5p   |
| EIF4E3 | hsa-miR-7106-5p   |
| EIF4E3 | hsa-miR-3473g     |
| EIF4E3 | hsa-miR-1273h-5p  |
| EIF4E3 | hsa-miR-7313-5p   |
| EIF4E3 | hsa-miR-502a      |
| EIF4E3 | hsa-miR-7865      |
| EIF4E3 | hsa-miR-4711-5p   |
| EIF4E3 | hsa-miR-4646-3p   |
| EIF4E3 | hsa-miR-30e-3p    |
| EIF4E3 | hsa-miR-3569-5p   |
| EIF4E3 | hsa-miR-712-5p    |
| EIF4E3 | hsa-miR-8071      |
| EIF4E3 | hsa-miR-421-3p    |
| EIF4E3 | hsa-miR-29a-5p    |
| EIF4E3 | hsa-miR-1677-5p   |
| EIF4E3 | hsa-miR-7211-5p   |
| EIF4E3 | hsa-miR-1468-3p   |
| EIF4E3 | hsa-miR-301b-3p   |
| EIF4E3 | hsa-miR-148-5p    |
| EIF4E3 | hsa-miR-500       |
| EIF4E3 | hsa-miR-1224-5p   |
| EIF4E3 | hsa-miR-6979-5p   |
| EIF4E3 | hsa-miR-7094-1-5p |
| EIF4E3 | hsa-miR-3089-5p   |

|        |                   |
|--------|-------------------|
| EIF4E3 | hsa-miR-547-3p    |
| EIF4E3 | hsa-miR-105-5p    |
| EIF4E3 | hsa-miR-7342-3p   |
| EIF4E3 | hsa-miR-7844-5p   |
| EIF4E3 | hsa-miR-6069      |
| EIF4E3 | hsa-miR-545-3p    |
| EIF4E3 | hsa-miR-4676-5p   |
| EIF4E3 | hsa-miR-6506-5p   |
| EIF4E3 | hsa-miR-124-5p    |
| EIF4E3 | hsa-miR-186-3p    |
| EIF4E3 | hsa-miR-194-5p    |
| EIF4E3 | hsa-miR-4662b     |
| EIF4E3 | hsa-miR-6958-3p   |
| EIF4E3 | hsa-miR-2285r     |
| EIF4E3 | hsa-miR-2380      |
| EIF4E3 | hsa-miR-6822-5p   |
| EIF4E3 | hsa-miR-2340      |
| EIF4E3 | hsa-miR-548w      |
| EIF4E3 | hsa-miR-197-3p    |
| EIF4E3 | hsa-miR-7347-5p   |
| EIF4E3 | hsa-miR-7481-5p   |
| EIF4E3 | hsa-miR-195-5p    |
| EIF4E3 | hsa-miR-4786-3p   |
| EIF4E3 | hsa-miR-146b-3p   |
| EIF4E3 | hsa-miR-7235-5p   |
| EIF4E3 | hsa-miR-3664-5p   |
| EIF4E3 | hsa-miR-130b-3p   |
| EIF4E3 | hsa-miR-369-3p    |
| EIF4E3 | hsa-miR-329b      |
| EIF4E3 | hsa-miR-6739-5p   |
| EIF4E3 | hsa-miR-6320      |
| EIF4E3 | hsa-miR-548t-5p   |
| EIF4E3 | hsa-miR-7515      |
| EIF4E3 | hsa-miR-670       |
| EIF4E3 | hsa-miR-576-3p    |
| EIF4E3 | hsa-miR-466bco-5p |
| EIF4E3 | hsa-miR-4279      |
| EIF4E3 | hsa-miR-6947-3p   |
| EIF4E3 | hsa-miR-2404      |
| EIF4E3 | hsa-miR-6901-3p   |
| EIF4E3 | hsa-miR-7663-3p   |
| EIF4E3 | hsa-miR-514-3p    |
| EIF4E3 | hsa-miR-466       |
| EIF4E3 | hsa-miR-8903      |
| EIF4E3 | hsa-miR-7667-5p   |
| EIF4E3 | hsa-miR-379-5p    |

|        |                  |
|--------|------------------|
| EIF4E3 | hsa-miR-3688-3p  |
| EIF4E3 | hsa-miR-6809-5p  |
| EIF4E3 | hsa-miR-376ab-3p |
| EIF4E3 | hsa-miR-676-5p   |
| EIF4E3 | hsa-miR-148-3p   |
| EIF4E3 | hsa-miR-6925-3p  |
| EIF4E3 | hsa-miR-342-5p   |
| EIF4E3 | hsa-miR-2482     |
| EIF4E3 | hsa-miR-664      |
| EIF4E3 | hsa-miR-147-5p   |
| EIF4E3 | hsa-miR-1838     |
| EIF4E3 | hsa-miR-487-3p   |
| EIF4E3 | hsa-miR-7057-5p  |
| EIF4E3 | hsa-miR-548aw    |
| EIF4E3 | hsa-miR-216b     |
| EIF4E3 | hsa-miR-29c-5p   |
| EIF4E3 | hsa-miR-3919     |
| EIF4E3 | hsa-miR-7168-5p  |
| EIF4E3 | hsa-miR-150-5p   |
| EIF4E3 | hsa-miR-6129     |
| EIF4E3 | hsa-miR-326      |
| EIF4E3 | hsa-miR-3655     |
| EIF4E3 | hsa-miR-7023-5p  |
| EIF4E3 | hsa-miR-6825-5p  |
| EIF4E3 | hsa-miR-6868-5p  |
| EIF4E3 | hsa-miR-19       |
| EIF4E3 | hsa-miR-7398n-5p |
| EIF4E3 | hsa-miR-2985     |
| EIF4E3 | hsa-miR-4653-5p  |
| EIF4E3 | hsa-miR-3570     |
| EIF4E3 | hsa-miR-7037-5p  |
| EIF4E3 | hsa-miR-374-5p   |
| EIF4E3 | hsa-miR-6925-5p  |
| EIF4E3 | hsa-miR-6132     |
| EIF4E3 | hsa-miR-5589-3p  |
| EIF4E3 | hsa-miR-1781-3p  |
| EIF4E3 | hsa-miR-1236-3p  |
| EIF4E3 | hsa-miR-503-3p   |
| EIF4E3 | hsa-miR-2285n    |
| EIF4E3 | hsa-miR-7273-5p  |
| EIF4E3 | hsa-miR-7240-5p  |
| EIF4E3 | hsa-miR-2114-5p  |
| EIF4E3 | hsa-miR-219-3p   |
| EIF4E3 | hsa-miR-224-5p   |
| EIF4E3 | hsa-miR-3173-3p  |
| EIF4E3 | hsa-miR-741-3p   |



|        |                  |
|--------|------------------|
| EIF4E3 | hsa-miR-380-5p   |
| EIF4E3 | hsa-miR-25-3p    |
| EIF4E3 | hsa-miR-692      |
| EIF4E3 | hsa-miR-3092-3p  |
| EIF4E3 | hsa-miR-7388c-5p |
| EIF4E3 | hsa-let-7g-3p    |
| EIF4E3 | hsa-miR-7398b-3p |
| EIF4E3 | hsa-miR-7676-5p  |
| EIF4E3 | hsa-miR-4698     |
| EIF4E3 | hsa-miR-7212-3p  |
| EIF4E3 | hsa-miR-463-5p   |
| EIF4E3 | hsa-miR-2284c    |
| EIF4E3 | hsa-miR-7184-3p  |
| EIF4E3 | hsa-miR-6964-3p  |
| EIF4E3 | hsa-miR-4728-5p  |
| EIF4E3 | hsa-miR-489-3p   |
| EIF4E3 | hsa-miR-501-3p   |
| EIF4E3 | hsa-miR-190b-3p  |
| EIF4E3 | hsa-miR-7201-3p  |
| EIF4E3 | hsa-miR-1775-3p  |
| EIF4E3 | hsa-miR-548ae-5p |
| EIF4E3 | hsa-miR-365a-5p  |
| EIF4E3 | hsa-miR-133b-5p  |
| EIF4E3 | hsa-miR-3077-3p  |
| EIF4E3 | hsa-miR-20       |
| EIF4E3 | hsa-miR-329-5p   |
| EIF4E3 | hsa-miR-7398m-3p |
| EIF4E3 | hsa-miR-1755     |
| EIF4E3 | hsa-miR-30c-3p   |
| EIF4E3 | hsa-miR-7065-5p  |
| EIF4E3 | hsa-miR-4253     |
| EIF4E3 | hsa-miR-7007-3p  |
| EIF4E3 | hsa-miR-548f-3p  |
| EIF4E3 | hsa-miR-8094     |
| EIF4E3 | hsa-miR-450a-5p  |
| EIF4E3 | hsa-miR-2284     |
| EIF4E3 | hsa-miR-1458     |
| EIF4E3 | hsa-miR-130c-5p  |
| EIF4E3 | hsa-miR-471-3p   |
| EIF4E3 | hsa-miR-7385c-3p |
| EIF4E3 | hsa-miR-322-3p   |
| EIF4E3 | hsa-miR-201-5p   |
| EIF4E3 | hsa-miR-6785-5p  |
| EIF4E3 | hsa-miR-7181-3p  |
| EIF4E3 | hsa-miR-1388-5p  |
| EIF4E3 | hsa-miR-4326     |

|        |                  |
|--------|------------------|
| EIF4E3 | hsa-miR-8884     |
| EIF4E3 | hsa-miR-6079     |
| EIF4E3 | hsa-let-7        |
| EIF4E3 | hsa-miR-454      |
| EIF4E3 | hsa-miR-1297     |
| EIF4E3 | hsa-miR-218-2-3p |
| EIF4E3 | hsa-miR-3121-3p  |
| EIF4E3 | hsa-miR-548ae-3p |
| EIF4E3 | hsa-miR-7093-5p  |
| EIF4E3 | hsa-miR-2381     |
| EIF4E3 | hsa-miR-7290-3p  |
| EIF4E3 | hsa-miR-211-3p   |
| EIF4E3 | hsa-miR-3689a-5p |
| EIF4E3 | hsa-miR-877-3p   |
| EIF4E3 | hsa-miR-3618-5p  |
| EIF4E3 | hsa-miR-2909     |
| EIF4E3 | hsa-miR-449b-3p  |
| EIF4E3 | hsa-miR-4651     |
| EIF4E3 | hsa-miR-5617-5p  |
| EIF4E3 | hsa-miR-548d-5p  |
| EIF4E3 | hsa-miR-8796     |
| EIF4E3 | hsa-miR-6755-5p  |
| EIF4E3 | hsa-miR-7357-5p  |
| EIF4E3 | hsa-miR-6944-5p  |
| EIF4E3 | hsa-miR-877-5p   |
| EIF4E3 | hsa-miR-193      |
| EIF4E3 | hsa-miR-8069     |
| EIF4E3 | hsa-miR-93-5p    |
| EIF4E3 | hsa-miR-144-3p   |
| EIF4E3 | hsa-miR-3654     |
| EIF4E3 | hsa-miR-4684-5p  |
| EIF4E3 | hsa-miR-6872-3p  |
| EIF4E3 | hsa-miR-2312     |
| EIF4E3 | hsa-miR-539-5p   |
| EIF4E3 | hsa-miR-143-3p   |
| EIF4E3 | hsa-miR-1237-5p  |
| EIF4E3 | hsa-miR-6996-3p  |
| EIF4E3 | hsa-miR-23       |
| EIF4E3 | hsa-miR-494-3p   |
| EIF4E3 | hsa-miR-221-3p   |
| EIF4E3 | hsa-miR-8871     |
| EIF4E3 | hsa-miR-7043-5p  |
| EIF4E3 | hsa-miR-664b-5p  |
| EIF4E3 | hsa-miR-684      |
| EIF4E3 | hsa-miR-548y     |
| EIF4E3 | hsa-miR-5121     |

|        |                   |
|--------|-------------------|
| EIF4E3 | hsa-miR-544a      |
| EIF4E3 | hsa-miR-1224-3p   |
| EIF4E3 | hsa-miR-3074-2-3p |
| EIF4E3 | hsa-miR-3094-3p   |
| EIF4E3 | hsa-miR-7056-5p   |
| EIF4E3 | hsa-miR-3193      |
| EIF4E3 | hsa-miR-7368-3p   |
| EIF4E3 | hsa-miR-4477a     |
| EIF4E3 | hsa-miR-2464-3p   |
| EIF4E3 | hsa-miR-7077-3p   |
| EIF4E3 | hsa-miR-1262-5p   |
| EIF4E3 | hsa-miR-7671-5p   |
| EIF4E3 | hsa-miR-2382-5p   |
| EIF4E3 | hsa-miR-890-5p    |
| EIF4E3 | hsa-miR-548av-5p  |
| EIF4E3 | hsa-miR-6513-3p   |
| EIF4E3 | hsa-miR-1323      |
| EIF4E3 | hsa-miR-100-3p    |
| EIF4E3 | hsa-miR-7843-5p   |
| EIF4E3 | hsa-miR-128       |
| EIF4E3 | hsa-miR-4727-5p   |
| EIF4E3 | hsa-miR-291       |
| EIF4E3 | hsa-miR-7078-3p   |
| EIF4E3 | hsa-miR-6859-5p   |
| EIF4E3 | hsa-miR-6744-5p   |
| EIF4E3 | hsa-miR-2384      |
| EIF4E3 | hsa-miR-1199-5p   |
| EIF4E3 | hsa-miR-6940-3p   |
| EIF4E3 | hsa-miR-651       |
| EIF4E3 | hsa-miR-3072-3p   |
| EIF4E3 | hsa-miR-381-3p    |
| EIF4E3 | hsa-miR-370       |
| EIF4E3 | hsa-miR-7060-5p   |
| EIF4E3 | hsa-miR-7012-3p   |
| EIF4E3 | hsa-miR-3977      |
| EIF4E3 | hsa-miR-2469      |
| EIF4E3 | hsa-miR-2325c     |
| EIF4E3 | hsa-miR-375       |
| EIF4E3 | hsa-miR-8802      |
| EIF4E3 | hsa-miR-6994-5p   |
| EIF4E3 | hsa-miR-3092-5p   |
| EIF4E3 | hsa-miR-9-3p      |
| EIF4E3 | hsa-miR-2392      |
| EIF4E3 | hsa-miR-4501      |
| EIF4E3 | hsa-miR-489       |
| EIF4E3 | hsa-miR-7674-5p   |

|        |                  |
|--------|------------------|
| EIF4E3 | hsa-miR-465c-5p  |
| EIF4E3 | hsa-miR-6516-3p  |
| EIF4E3 | hsa-miR-153-3p   |
| EIF4E3 | hsa-miR-4761-3p  |
| EIF4E3 | hsa-miR-146-5p   |
| EIF4E3 | hsa-miR-7374a-3p |
| EIF4E3 | hsa-miR-3087-5p  |
| EIF4E3 | hsa-miR-5107-5p  |
| EIF4E3 | hsa-miR-1190     |
| EIF4E3 | hsa-miR-616-3p   |
| EIF4E3 | hsa-miR-7227-5p  |
| EIF4E3 | hsa-miR-4768-3p  |
| EIF4E3 | hsa-miR-7064-5p  |
| EIF4E3 | hsa-miR-1783     |
| EIF4E3 | hsa-miR-7343-3p  |
| EIF4E3 | hsa-miR-3158-5p  |
| EIF4E3 | hsa-miR-6932-3p  |
| EIF4E3 | hsa-miR-1277-5p  |
| EIF4E3 | hsa-miR-6752-3p  |
| EIF4E3 | hsa-miR-8883     |
| EIF4E3 | hsa-miR-6777-3p  |
| EIF4E3 | hsa-miR-1537-5p  |
| EIF4E3 | hsa-miR-8806     |
| EIF4E3 | hsa-miR-1892     |
| EIF4E3 | hsa-miR-1225-3p  |
| EIF4E3 | hsa-miR-17       |
| EIF4E3 | hsa-miR-302-5p   |
| EIF4E3 | hsa-miR-502-5p   |
| EIF4E3 | hsa-miR-487b-5p  |
| EIF4E3 | hsa-miR-3601     |
| EIF4E3 | hsa-miR-3102     |
| EIF4E3 | hsa-miR-8867     |
| EIF4E3 | hsa-miR-4794     |
| EIF4E3 | hsa-miR-146      |
| EIF4E3 | hsa-miR-6996-5p  |
| EIF4E3 | hsa-miR-541-3p   |
| EIF4E3 | hsa-miR-7276-3p  |
| EIF4E3 | hsa-miR-6582-3p  |
| EIF4E3 | hsa-miR-633      |
| EIF4E3 | hsa-miR-7270-5p  |
| EIF4E3 | hsa-miR-7335-3p  |
| EIF4E3 | hsa-miR-8812     |
| EIF4E3 | hsa-miR-4516     |
| EIF4E3 | hsa-miR-5001-3p  |
| EIF4E3 | hsa-miR-5584-5p  |
| EIF4E3 | hsa-miR-1271-5p  |

|        |                  |
|--------|------------------|
| EIF4E3 | hsa-miR-7094-3p  |
| EIF4E3 | hsa-miR-4776-3p  |
| EIF4E3 | hsa-miR-4328     |
| EIF4E3 | hsa-miR-769-3p   |
| EIF4E3 | hsa-miR-320e     |
| EIF4E3 | hsa-miR-7386f-3p |
| EIF4E3 | hsa-miR-434-5p   |
| EIF4E3 | hsa-miR-1664-5p  |
| EIF4E3 | hsa-miR-6952-3p  |
| EIF4E3 | hsa-miR-743-5p   |
| EIF4E3 | hsa-miR-7030-5p  |
| EIF4E3 | hsa-miR-150-3p   |
| EIF4E3 | hsa-miR-7053-5p  |
| EIF4E3 | hsa-miR-6841-3p  |
| EIF4E3 | hsa-miR-6846-5p  |
| EIF4E3 | hsa-miR-8790     |
| EIF4E3 | hsa-miR-205-5p   |
| EIF4E3 | hsa-miR-219c-3p  |
| EIF4E3 | hsa-miR-1233-5p  |
| EIF4E3 | hsa-miR-2284n    |
| EIF4E3 | hsa-miR-4445-5p  |
| EIF4E3 | hsa-miR-10       |
| EIF4E3 | hsa-miR-2364     |
| EIF4E3 | hsa-miR-7399-3p  |
| EIF4E3 | hsa-miR-292b-5p  |
| EIF4E3 | hsa-miR-23b-3p   |
| EIF4E3 | hsa-miR-3140-3p  |
| EIF4E3 | hsa-miR-107-3p   |
| EIF4E3 | hsa-miR-7655-5p  |
| EIF4E3 | hsa-miR-7379-3p  |
| EIF4E3 | hsa-miR-466dk-5p |
| EIF4E3 | hsa-miR-584-3p   |
| EIF4E3 | hsa-miR-4657     |
| EIF4E3 | hsa-miR-6910-3p  |
| EIF4E3 | hsa-miR-5010-5p  |
| EIF4E3 | hsa-miR-7366-5p  |
| EIF4E3 | hsa-miR-4729     |
| EIF4E3 | hsa-miR-770-5p   |
| EIF4E3 | hsa-miR-488-3p   |
| EIF4E3 | hsa-miR-804      |
| EIF4E3 | hsa-miR-3070-3p  |
| EIF4E3 | hsa-miR-1285-5p  |
| EIF4E3 | hsa-miR-483-3p   |
| EIF4E3 | hsa-miR-6536     |
| EIF4E3 | hsa-miR-2465     |
| EIF4E3 | hsa-miR-7309-3p  |

|        |                   |
|--------|-------------------|
| EIF4E3 | hsa-miR-624-3p    |
| EIF4E3 | hsa-miR-136-5p    |
| EIF4E3 | hsa-miR-548am-3p  |
| EIF4E3 | hsa-miR-147a      |
| EIF4E3 | hsa-miR-129-5p    |
| EIF4E3 | hsa-miR-335-3p    |
| EIF4E3 | hsa-miR-892b      |
| EIF4E3 | hsa-miR-1200      |
| EIF4E3 | hsa-miR-626       |
| EIF4E3 | hsa-miR-683       |
| EIF4E3 | hsa-miR-6120-3p   |
| EIF4E3 | hsa-miR-3915      |
| EIF4E3 | hsa-miR-3163      |
| EIF4E3 | hsa-miR-4733-5p   |
| EIF4E3 | hsa-miR-183-5p.2  |
| EIF4E3 | hsa-miR-548a-5p   |
| EIF4E3 | hsa-miR-7114-5p   |
| EIF4E3 | hsa-miR-8908b     |
| EIF4E3 | hsa-miR-548aq-5p  |
| EIF4E3 | hsa-miR-4275      |
| EIF4E3 | hsa-miR-6122-3p   |
| EIF4E3 | hsa-miR-3187-3p   |
| EIF4E3 | hsa-miR-6911-3p   |
| EIF4E3 | hsa-miR-7078-5p   |
| EIF4E3 | hsa-miR-644a      |
| EIF4E3 | hsa-miR-7057-3p   |
| EIF4E3 | hsa-miR-8100      |
| EIF4E3 | hsa-let-7abf-3p   |
| EIF4E3 | hsa-miR-5704      |
| EIF4E3 | hsa-miR-7031-5p   |
| EIF4E3 | hsa-miR-7390-3p   |
| EIF4E3 | hsa-miR-203-3p.1  |
| EIF4E3 | hsa-miR-4736      |
| EIF4E3 | hsa-miR-192-3p    |
| EIF4E3 | hsa-miR-7386k-3p  |
| EIF4E3 | hsa-miR-181b-1-3p |
| EIF4E3 | hsa-miR-669e-3p   |
| EIF4E3 | hsa-miR-5694      |
| EIF4E3 | hsa-miR-33b-3p    |
| EIF4E3 | hsa-miR-3613-5p   |
| EIF4E3 | hsa-miR-3689e     |
| EIF4E3 | hsa-miR-301-5p    |
| EIF4E3 | hsa-miR-7243-5p   |
| EIF4E3 | hsa-miR-466c-3p   |
| EIF4E3 | hsa-miR-103-3p    |
| EIF4E3 | hsa-miR-4470      |

|        |                   |
|--------|-------------------|
| EIF4E3 | hsa-miR-5010-3p   |
| EIF4E3 | hsa-miR-2332      |
| EIF4E3 | hsa-miR-7324-5p   |
| EIF4E3 | hsa-miR-1276      |
| EIF4E3 | hsa-miR-1b-5p     |
| EIF4E3 | hsa-miR-6890-3p   |
| EIF4E3 | hsa-miR-199-5p    |
| EIF4E3 | hsa-miR-410       |
| EIF4E3 | hsa-miR-6836-5p   |
| EIF4E3 | hsa-miR-1843      |
| EIF4E3 | hsa-miR-3157-5p   |
| EIF4E3 | hsa-miR-7278-3p   |
| EIF4E3 | hsa-miR-1718      |
| EIF4E3 | hsa-miR-29        |
| EIF4E3 | hsa-miR-135b-3p   |
| EIF4E3 | hsa-miR-1746      |
| EIF4E3 | hsa-miR-7109-5p   |
| EIF4E3 | hsa-miR-5096      |
| EIF4E3 | hsa-miR-8890      |
| EIF4E3 | hsa-miR-325-3p    |
| EIF4E3 | hsa-miR-4641      |
| EIF4E3 | hsa-miR-939-5p    |
| EIF4E3 | hsa-miR-300       |
| EIF4E3 | hsa-miR-874-3p    |
| EIF4E3 | hsa-miR-762       |
| EIF4E3 | hsa-miR-7689-3p   |
| EIF4E3 | hsa-miR-3100-5p   |
| EIF4E3 | hsa-miR-7055-3p   |
| EIF4E3 | hsa-miR-7656-3p   |
| EIF4E3 | hsa-miR-345-5p    |
| EIF4E3 | hsa-miR-133a-3p.1 |
| EIF4E3 | hsa-miR-623       |
| EIF4E3 | hsa-miR-1683      |
| EIF4E3 | hsa-miR-1951      |
| EIF4E3 | hsa-miR-2284u     |
| EIF4E3 | hsa-miR-4725-3p   |
| EIF4E3 | hsa-miR-8875      |
| EIF4E3 | hsa-miR-2115-3p   |
| EIF4E3 | hsa-miR-5088-5p   |
| EIF4E3 | hsa-miR-634       |
| EIF4E3 | hsa-miR-15a-3p    |
| EIF4E3 | hsa-miR-4648      |
| EIF4E3 | hsa-miR-7387-3p   |
| EIF4E3 | hsa-miR-6998-5p   |
| EIF4E3 | hsa-miR-152       |
| EIF4E3 | hsa-miR-548bd-3p  |

|        |                   |
|--------|-------------------|
| EIF4E3 | hsa-miR-7246-5p   |
| EIF4E3 | hsa-miR-5197-3p   |
| EIF4E3 | hsa-miR-5589-5p   |
| EIF4E3 | hsa-miR-6950-3p   |
| EIF4E3 | hsa-miR-1908-5p   |
| EIF4E3 | hsa-miR-605       |
| EIF4E3 | hsa-miR-7664-3p   |
| EIF4E3 | hsa-miR-5116      |
| EIF4E3 | hsa-miR-693-3p    |
| EIF4E3 | hsa-miR-631       |
| EIF4E3 | hsa-miR-125b-1-3p |
| EIF4E3 | hsa-miR-34b-3p    |
| EIF4E3 | hsa-miR-3074-3p   |
| EIF4E3 | hsa-miR-7398s-3p  |
| EIF4E3 | hsa-miR-3168      |
| EIF4E3 | hsa-miR-6978-5p   |
| EIF4E3 | hsa-miR-6731-5p   |
| EIF4E3 | hsa-miR-362-3p    |
| EIF4E3 | hsa-miR-4765      |
| EIF4E3 | hsa-miR-1903      |
| EIF4E3 | hsa-miR-4286      |
| EIF4E3 | hsa-miR-203-5p    |
| EIF4E3 | hsa-miR-1237-3p   |
| EIF4E3 | hsa-miR-552       |
| EIF4E3 | hsa-miR-6704-5p   |
| EIF4E3 | hsa-miR-7111-5p   |
| EIF4E3 | hsa-miR-376a-5p   |
| EIF4E3 | hsa-miR-3690      |
| EIF4E3 | hsa-miR-7192-3p   |
| EIF4E3 | hsa-miR-3099-3p   |
| EIF4E3 | hsa-miR-500a-3p   |
| EIF4E3 | hsa-miR-1248      |
| EIF4E3 | hsa-miR-3104-3p   |
| EIF4E3 | hsa-miR-508-3p    |
| EIF4E3 | hsa-miR-455-3p.2  |
| EIF4E3 | hsa-miR-4680-3p   |
| EIF4E3 | hsa-miR-6340      |
| EIF4E3 | hsa-miR-7313-3p   |
| EIF4E3 | hsa-miR-3101-5p   |
| EIF4E3 | hsa-miR-2890      |
| EIF4E3 | hsa-miR-2893      |
| EIF4E3 | hsa-miR-1929-3p   |
| EIF4E3 | hsa-miR-2454-3p   |
| EIF4E3 | hsa-miR-520f-5p   |
| EIF4E3 | hsa-miR-516b-5p   |
| EIF4E3 | hsa-miR-548ba     |



|        |                  |
|--------|------------------|
| EIF4E3 | hsa-miR-8074     |
| EIF4E3 | hsa-miR-6779-3p  |
| EIF4E3 | hsa-miR-1273h-3p |
| EIF4E3 | hsa-miR-7200-3p  |
| EIF4E3 | hsa-miR-7005-5p  |
| EIF4E3 | hsa-miR-455-3p   |
| EIF4E3 | hsa-miR-6927-3p  |
| EIF4E3 | hsa-miR-1814b    |
| EIF4E3 | hsa-miR-7665-5p  |
| EIF4E3 | hsa-miR-4706     |
| EIF4E3 | hsa-miR-3958     |
| EIF4E3 | hsa-miR-7398t-3p |
| EIF4E3 | hsa-miR-522-3p   |
| EIF4E3 | hsa-miR-7158-3p  |
| EIF4E3 | hsa-miR-8908e    |
| EIF4E3 | hsa-miR-1544b-5p |
| EIF4E3 | hsa-miR-2421     |
| EIF4E3 | hsa-miR-132-5p   |
| EIF4E3 | hsa-miR-2361     |
| EIF4E3 | hsa-miR-667-3p   |
| EIF4E3 | hsa-miR-1273g-5p |
| EIF4E3 | hsa-miR-4787-5p  |
| EIF4E3 | hsa-miR-1260a    |
| EIF4E3 | hsa-miR-2888     |
| EIF4E3 | hsa-miR-141-3p   |
| EIF4E3 | hsa-miR-2325     |
| EIF4E3 | hsa-miR-6975-3p  |
| EIF4E3 | hsa-miR-4756-3p  |
| EIF4E3 | hsa-miR-1702     |
| EIF4E3 | hsa-miR-883ab-3p |
| EIF4E3 | hsa-miR-222-5p   |
| EIF4E3 | hsa-miR-483-3p   |
| EIF4E3 | hsa-miR-550a-3p  |
| EIF4E3 | hsa-miR-96-5p    |
| EIF4E3 | hsa-miR-1284     |
| EIF4E3 | hsa-miR-6775-3p  |
| EIF4E3 | hsa-miR-3470b    |
| EIF4E3 | hsa-miR-292b-3p  |
| EIF4E3 | hsa-miR-342-3p   |
| EIF4E3 | hsa-miR-4446-3p  |
| EIF4E3 | hsa-miR-3084-5p  |
| EIF4E3 | hsa-miR-21-5p    |
| EIF4E3 | hsa-miR-6654-3p  |
| EIF4E3 | hsa-miR-3103-5p  |
| EIF4E3 | hsa-miR-6869-5p  |
| EIF4E3 | hsa-miR-2387     |

|        |                  |
|--------|------------------|
| EIF4E3 | hsa-miR-545-5p   |
| EIF4E3 | hsa-miR-603      |
| EIF4E3 | hsa-miR-6964-5p  |
| EIF4E3 | hsa-miR-6999-3p  |
| EIF4E3 | hsa-miR-384-3p   |
| EIF4E3 | hsa-miR-6791-5p  |
| EIF4E3 | hsa-miR-544a     |
| EIF4E3 | hsa-miR-6948-5p  |
| EIF4E3 | hsa-miR-3663-3p  |
| EIF4E3 | hsa-miR-1938     |
| EIF4E3 | hsa-miR-4663     |
| EIF4E3 | hsa-miR-743b-3p  |
| EIF4E3 | hsa-miR-6401     |
| EIF4E3 | hsa-miR-1225     |
| EIF4E3 | hsa-miR-575      |
| EIF4E3 | hsa-miR-6882-5p  |
| EIF4E3 | hsa-miR-4446-5p  |
| EIF4E3 | hsa-miR-2370-5p  |
| EIF4E3 | hsa-miR-499b-5p  |
| EIF4E3 | hsa-miR-2386     |
| EIF4E3 | hsa-miR-7312-3p  |
| EIF4E3 | hsa-miR-890      |
| EIF4E3 | hsa-miR-3577-5p  |
| EIF4E3 | hsa-miR-7352-3p  |
| EIF4E3 | hsa-miR-760-5p   |
| EIF4E3 | hsa-miR-679-3p   |
| EIF4E3 | hsa-miR-7863     |
| EIF4E3 | hsa-miR-6523b    |
| EIF4E3 | hsa-miR-548bb-3p |
| EIF4E3 | hsa-miR-4639-5p  |
| EIF4E3 | hsa-miR-1911-5p  |
| EIF4E3 | hsa-miR-6122-5p  |
| EIF4E3 | hsa-miR-196-5p   |
| EIF4E3 | hsa-miR-126-3p   |
| EIF4E3 | hsa-miR-6927-5p  |
| EIF4E3 | hsa-miR-106-3p   |
| EIF4E3 | hsa-miR-892a     |
| EIF4E3 | hsa-miR-26a-5p   |
| EIF4E3 | hsa-miR-7353-3p  |
| EIF4E3 | hsa-miR-10b-5p   |
| EIF4E3 | hsa-miR-655-3p   |
| EIF4E3 | hsa-miR-421-5p   |
| EIF4E3 | hsa-miR-3088-3p  |
| EIF4E3 | hsa-miR-154-5p   |
| EIF4E3 | hsa-miR-7166-3p  |
| EIF4E3 | hsa-miR-4720-5p  |

|        |                  |
|--------|------------------|
| EIF4E3 | hsa-miR-9-5p     |
| EIF4E3 | hsa-miR-6986-5p  |
| EIF4E3 | hsa-miR-31-5p    |
| EIF4E3 | hsa-miR-381-3p   |
| EIF4E3 | hsa-miR-2344     |
| EIF4E3 | hsa-miR-6864-5p  |
| EIF4E3 | hsa-miR-8842     |
| EIF4E3 | hsa-miR-548ad-5p |
| EIF4E3 | hsa-miR-1943-5p  |
| EIF4E3 | hsa-miR-516-3p   |
| EIF4E3 | hsa-miR-6716-3p  |
| EIF4E3 | hsa-miR-7211-3p  |
| EIF4E3 | hsa-miR-384-5p   |
| EIF4E3 | hsa-miR-873b     |
| EIF4E3 | hsa-miR-7256-5p  |
| EIF4E3 | hsa-miR-501-5p   |
| EIF4E3 | hsa-miR-292-5p   |
| EIF4E3 | hsa-miR-449-5p   |
| EIF4E3 | hsa-miR-2372     |
| EIF4E3 | hsa-miR-2399-5p  |
| EIF4E3 | hsa-miR-127-5p   |
| EIF4E3 | hsa-miR-8103     |
| EIF4E3 | hsa-miR-5571-3p  |
| EIF4E3 | hsa-miR-383-3p   |
| EIF4E3 | hsa-miR-6077     |
| EIF4E3 | hsa-let-7-3p     |
| EIF4E3 | hsa-miR-4462     |
| EIF4E3 | hsa-miR-8845     |
| EIF4E3 | hsa-miR-2405     |
| EIF4E3 | hsa-miR-7027-5p  |
| EIF4E3 | hsa-miR-6759-3p  |
| EIF4E3 | hsa-miR-6715-3p  |
| EIF4E3 | hsa-miR-4273     |
| EIF4E3 | hsa-miR-2284aa   |
| EIF4E3 | hsa-miR-6119-3p  |
| EIF4E3 | hsa-miR-545-3p   |
| EIF4E3 | hsa-miR-6776-5p  |
| EIF4E3 | hsa-miR-880-5p   |
| EIF4E3 | hsa-miR-187-3p   |
| EIF4E3 | hsa-miR-433-3p   |
| EIF4E3 | hsa-miR-26b-5p   |
| EIF4E3 | hsa-miR-7386m-5p |
| EIF4E3 | hsa-miR-3962     |
| EIF4E3 | hsa-miR-1629     |
| EIF4E3 | hsa-miR-532-5p   |
| EIF4E3 | hsa-miR-7088-3p  |

|        |                  |
|--------|------------------|
| EIF4E3 | hsa-miR-3080-5p  |
| EIF4E3 | hsa-miR-139-5p   |
| EIF4E3 | hsa-miR-8058     |
| EIF4E3 | hsa-miR-669n     |
| EIF4E3 | hsa-miR-7117-3p  |
| EIF4E3 | hsa-miR-4714-5p  |
| EIF4E3 | hsa-miR-96-5p    |
| EIF4E3 | hsa-miR-8846     |
| EIF4E3 | hsa-miR-8904b    |
| EIF4E3 | hsa-let-7-5p     |
| EIF4E3 | hsa-miR-653      |
| EIF4E3 | hsa-miR-5627-5p  |
| EIF4E3 | hsa-miR-7152-5p  |
| EIF4E3 | hsa-miR-4661-3p  |
| EIF4E3 | hsa-miR-6935-3p  |
| EIF4E3 | hsa-miR-3133     |
| EIF4E3 | hsa-miR-3068-5p  |
| EIF4E3 | hsa-miR-6403     |
| EIF4E3 | hsa-miR-2887     |
| EIF4E3 | hsa-miR-759      |
| EIF4E3 | hsa-miR-5046     |
| EIF4E3 | hsa-miR-7669-5p  |
| EIF4E3 | hsa-miR-654-5p   |
| EIF4E3 | hsa-miR-467a-5p  |
| EIF4E3 | hsa-miR-4474-5p  |
| EIF4E3 | hsa-miR-7160-5p  |
| EIF4E3 | hsa-miR-7218-3p  |
| EIF4E3 | hsa-miR-6511a-5p |
| EIF4E3 | hsa-miR-34a-3p   |
| EIF4E3 | hsa-miR-4464     |
| EIF4E3 | hsa-miR-718      |
| EIF4E3 | hsa-miR-7208-3p  |
| EIF4E3 | hsa-miR-105b     |
| EIF4E3 | hsa-miR-6962-3p  |
| EIF4E3 | hsa-miR-3957     |
| EIF4E3 | hsa-miR-7272-5p  |
| EIF4E3 | hsa-miR-7856-5p  |
| EIF4E3 | hsa-miR-670-5p   |
| EIF4E3 | hsa-miR-2368-5p  |
| EIF4E3 | hsa-miR-520gh    |
| EIF4E3 | hsa-miR-188-5p   |
| EIF4E3 | hsa-miR-4256     |
| EIF4E3 | hsa-miR-4435     |
| EIF4E3 | hsa-miR-3079-3p  |
| EIF4E3 | hsa-miR-3659     |
| EIF4E3 | hsa-miR-610      |

|        |                   |
|--------|-------------------|
| EIF4E3 | hsa-miR-591       |
| EIF4E3 | hsa-miR-3164      |
| EIF4E3 | hsa-miR-7178-3p   |
| EIF4E3 | hsa-miR-1913      |
| EIF4E3 | hsa-miR-134-5p    |
| EIF4E3 | hsa-miR-6391      |
| EIF4E3 | hsa-miR-450b-5p   |
| EIF4E3 | hsa-miR-129-5p    |
| EIF4E3 | hsa-miR-4255      |
| EIF4E3 | hsa-miR-6817-3p   |
| EIF4E3 | hsa-miR-7218-5p   |
| EIF4E3 | hsa-miR-92        |
| EIF4E3 | hsa-miR-8794      |
| EIF4E3 | hsa-miR-154c      |
| EIF4E3 | hsa-miR-669j      |
| EIF4E3 | hsa-miR-3912-5p   |
| EIF4E3 | hsa-miR-320a      |
| EIF4E3 | hsa-miR-3583-5p   |
| EIF4E3 | hsa-miR-3117-5p   |
| EIF4E3 | hsa-miR-465a-5p   |
| EIF4E3 | hsa-miR-8876      |
| EIF4E3 | hsa-miR-4269      |
| EIF4E3 | hsa-miR-470-5p    |
| EIF4E3 | hsa-miR-326-3p    |
| EIF4E3 | hsa-miR-1249-5p   |
| EIF4E3 | hsa-miR-383-5p    |
| EIF4E3 | hsa-miR-15-5p     |
| EIF4E3 | hsa-miR-101a-3p.2 |
| EIF4E3 | hsa-miR-1910-5p   |
| EIF4E3 | hsa-miR-8836      |
| EIF4E3 | hsa-miR-548i      |
| EIF4E3 | hsa-miR-6322      |
| EIF4E3 | hsa-miR-7191-5p   |
| EIF4E3 | hsa-miR-557       |
| EIF4E3 | hsa-miR-6414      |
| EIF4E3 | hsa-miR-6979-3p   |
| EIF4E3 | hsa-miR-124c-5p   |
| EIF4E3 | hsa-miR-1750      |
| EIF4E3 | hsa-miR-888-3p    |
| EIF4E3 | hsa-miR-16-3p     |
| EIF4E3 | hsa-miR-412-3p    |
| EIF4E3 | hsa-miR-7077-5p   |
| EIF4E3 | hsa-miR-7214-5p   |
| EIF4E3 | hsa-miR-6326      |
| EIF4E3 | hsa-miR-365-3p    |
| EIF4E3 | hsa-miR-630       |

|        |                  |
|--------|------------------|
| EIF4E3 | hsa-miR-125a-3p  |
| EIF4E3 | hsa-miR-3201     |
| EIF4E3 | hsa-miR-1711     |
| EIF4E3 | hsa-miR-378      |
| EIF4E3 | hsa-miR-5623-5p  |
| EIF4E3 | hsa-miR-8118     |
| EIF4E3 | hsa-miR-376a-3p  |
| EIF4E3 | hsa-miR-3677-5p  |
| EIF4E3 | hsa-miR-3921     |
| EIF4E3 | hsa-miR-510      |
| EIF4E3 | hsa-miR-411-5p   |
| EIF4E3 | hsa-miR-8887     |
| EIF4E3 | hsa-miR-8117     |
| EIF4E3 | hsa-miR-7013-3p  |
| EIF4E3 | hsa-miR-6968-5p  |
| EIF4E3 | hsa-miR-6803-5p  |
| EIF4E3 | hsa-miR-3085-5p  |
| EIF4E3 | hsa-miR-548      |
| EIF4E3 | hsa-miR-506-3p   |
| EIF4E3 | hsa-miR-4329     |
| EIF4E3 | hsa-miR-7186-5p  |
| EIF4E3 | hsa-miR-2454-5p  |
| EIF4E3 | hsa-miR-30ad-3p  |
| EIF4E3 | hsa-miR-6833-3p  |
| EIF4E3 | hsa-miR-467f     |
| EIF4E3 | hsa-miR-1241     |
| EIF4E3 | hsa-miR-6817-5p  |
| EIF4E3 | hsa-miR-8081     |
| EIF4E3 | hsa-miR-4772-3p  |
| EIF4E3 | hsa-miR-6754-3p  |
| EIF4E3 | hsa-miR-2416     |
| EIF4E3 | hsa-miR-802-5p   |
| EIF4E3 | hsa-miR-1251     |
| EIF4E3 | hsa-miR-2474     |
| EIF4E3 | hsa-miR-16c-3p   |
| EIF4E3 | hsa-miR-2284k    |
| EIF4E3 | hsa-miR-340-3p   |
| EIF4E3 | hsa-miR-511-3p   |
| EIF4E3 | hsa-miR-15b-3p   |
| EIF4E3 | hsa-miR-148a-5p  |
| EIF4E3 | hsa-miR-6809-3p  |
| EIF4E3 | hsa-miR-6381     |
| EIF4E3 | hsa-miR-6770-5p  |
| EIF4E3 | hsa-miR-6895-3p  |
| EIF4E3 | hsa-miR-10a-3p   |
| EIF4E3 | hsa-miR-3689b-5p |

|        |                  |
|--------|------------------|
| EIF4E3 | hsa-miR-1306-3p  |
| EIF4E3 | hsa-miR-1260b    |
| EIF4E3 | hsa-miR-5701     |
| EIF4E3 | hsa-miR-7228-3p  |
| EIF4E3 | hsa-miR-191-5p   |
| EIF4E3 | hsa-miR-763      |
| EIF4E3 | hsa-miR-200bc-3p |
| EIF4E3 | hsa-miR-3080-3p  |
| EIF4E3 | hsa-miR-410-5p   |
| EIF4E3 | hsa-miR-518d-5p  |
| EIF4E3 | hsa-miR-505-5p   |
| EIF4E3 | hsa-miR-4307     |
| EIF4E3 | hsa-miR-7398k-5p |
| EIF4E3 | hsa-miR-142-5p   |
| EIF4E3 | hsa-miR-5108     |
| EIF4E3 | hsa-miR-7295-3p  |
| EIF4E3 | hsa-miR-5009-5p  |
| EIF4E3 | hsa-miR-373-3p   |
| EIF4E3 | hsa-miR-4685-5p  |
| EIF4E3 | hsa-miR-7685-5p  |
| EIF4E3 | hsa-miR-379-3p   |
| EIF4E3 | hsa-miR-1630     |
| EIF4E3 | hsa-miR-6851-3p  |
| EIF4E3 | hsa-miR-4423-3p  |
| EIF4E3 | hsa-miR-7028-5p  |
| EIF4E3 | hsa-miR-1542-3p  |
| EIF4E3 | hsa-miR-140-5p   |
| EIF4E3 | hsa-miR-766-3p   |
| EIF4E3 | hsa-miR-6984-5p  |
| EIF4E3 | hsa-miR-2323     |
| EIF4E3 | hsa-miR-5584-3p  |
| EIF4E3 | hsa-miR-669o-5p  |
| EIF4E3 | hsa-miR-2314     |
| EIF4E3 | hsa-miR-6720-5p  |
| EIF4E3 | hsa-miR-181-5p   |
| EIF4E3 | hsa-miR-6866-5p  |
| EIF4E3 | hsa-miR-613      |
| EIF4E3 | hsa-miR-151-3p   |
| EIF4E3 | hsa-miR-1188-5p  |
| EIF4E3 | hsa-miR-599      |
| EIF4E3 | hsa-miR-8908-3p  |
| EIF4E3 | hsa-miR-6500-3p  |
| EIF4E3 | hsa-miR-5681a    |
| EIF4E3 | hsa-miR-1253     |
| EIF4E3 | hsa-miR-7208-5p  |
| EIF4E3 | hsa-miR-7684-3p  |

|        |                  |
|--------|------------------|
| EIF4E3 | hsa-miR-3066-3p  |
| EIF4E3 | hsa-miR-6747-5p  |
| EIF4E3 | hsa-miR-4533     |
| EIF4E3 | hsa-miR-4272     |
| EIF4E3 | hsa-miR-7386m-3p |
| EIF4E3 | hsa-miR-6914-3p  |
| EIF4E3 | hsa-miR-383-5p.2 |
| EIF4E3 | hsa-miR-1545c-3p |
| EIF4E3 | hsa-miR-7159-3p  |
| EIF4E3 | hsa-miR-7354-3p  |
| EIF4E3 | hsa-miR-9500     |
| EIF4E3 | hsa-miR-8104     |
| EIF4E3 | hsa-miR-338-5p   |
| EIF4E3 | hsa-miR-7262b-5p |
| EIF4E3 | hsa-miR-648      |
| EIF4E3 | hsa-miR-7373-5p  |
| EIF4E3 | hsa-miR-4426     |
| EIF4E3 | hsa-miR-1745     |
| EIF4E3 | hsa-miR-101-3p   |
| EIF4E3 | hsa-miR-6896-3p  |
| EIF4E3 | hsa-miR-1245-3p  |
| EIF4E3 | hsa-miR-891-5p   |
| EIF4E3 | hsa-miR-429      |
| EIF4E3 | hsa-miR-7061-5p  |
| EIF4E3 | hsa-miR-3580-5p  |
| EIF4E3 | hsa-miR-5011-5p  |
| EIF4E3 | hsa-miR-7006-3p  |
| EIF4E3 | hsa-miR-183-3p   |
| EIF4E3 | hsa-miR-883-5p   |
| EIF4E3 | hsa-miR-1764-3p  |
| EIF4E3 | hsa-miR-3544-5p  |
| EIF4E3 | hsa-miR-669k-5p  |
| EIF4E3 | hsa-miR-7-5p     |
| EIF4E3 | hsa-miR-2466-5p  |
| EIF4E3 | hsa-miR-7305-5p  |
| EIF4E3 | hsa-miR-7370-5p  |
| EIF4E3 | hsa-miR-669c-5p  |
| EIF4E3 | hsa-miR-185-3p   |
| EIF4E3 | hsa-miR-6913-3p  |
| EIF4E3 | hsa-miR-6388     |
| EIF4E3 | hsa-miR-669e-5p  |
| EIF4E3 | hsa-miR-504-5p   |
| EIF4E3 | hsa-miR-551b-5p  |
| EIF4E3 | hsa-miR-674-3p   |
| EIF4E3 | hsa-miR-217-3p   |
| EIF4E3 | hsa-miR-411-3p   |



|        |                  |
|--------|------------------|
| EIF4E3 | hsa-miR-137-3p   |
| EIF4E3 | hsa-miR-1967     |
| EIF4E3 | hsa-miR-425-5p   |
| EIF4E3 | hsa-miR-6997-5p  |
| EIF4E3 | hsa-miR-2367-5p  |
| EIF4E3 | hsa-miR-1240     |
| EIF4E3 | hsa-miR-666-3p   |
| EIF4E3 | hsa-miR-362-5p   |
| EIF4E3 | hsa-miR-6515-3p  |
| EIF4E3 | hsa-miR-526b-5p  |
| EIF4E3 | hsa-miR-7a-1-3p  |
| EIF4E3 | hsa-miR-1291     |
| EIF4E3 | hsa-miR-200c-5p  |
| EIF4E3 | hsa-miR-6878-5p  |
| EIF4E3 | hsa-miR-2681-5p  |
| EIF4E3 | hsa-miR-516b     |
| EIF4E3 | hsa-miR-3473c    |
| EIF4E3 | hsa-miR-1643b-5p |
| EIF4E3 | hsa-miR-7386k-5p |
| EIF4E3 | hsa-miR-2374     |
| EIF4E3 | hsa-miR-208a-3p  |
| EIF4E3 | hsa-miR-7285-3p  |
| EIF4E3 | hsa-miR-505-3p.1 |
| EIF4E3 | hsa-miR-196      |
| EIF4E3 | hsa-miR-2313-3p  |
| EIF4E3 | hsa-miR-592-3p   |
| EIF4E3 | hsa-miR-4724-3p  |
| EIF4E3 | hsa-miR-597-3p   |
| EIF4E3 | hsa-miR-6878-3p  |
| EIF4E3 | hsa-miR-6647-5p  |
| EIF4E3 | hsa-miR-4640-5p  |
| EIF4E3 | hsa-miR-1287-5p  |
| EIF4E3 | hsa-miR-7075-5p  |
| EIF4E3 | hsa-miR-669h-5p  |
| EIF4E3 | hsa-miR-659-3p   |
| EIF4E3 | hsa-miR-30d-3p   |
| EIF4E3 | hsa-miR-508-3p   |
| EIF4E3 | hsa-miR-5112     |
| EIF4E3 | hsa-miR-499-5p   |
| EIF4E3 | hsa-miR-454-3p   |
| EIF4E3 | hsa-miR-4797-3p  |
| EIF4E3 | hsa-miR-207      |
| EIF4E3 | hsa-miR-4682     |
| EIF4E3 | hsa-miR-1776     |
| EIF4E3 | hsa-miR-3090-3p  |
| EIF4E3 | hsa-miR-1233-3p  |

|        |                   |
|--------|-------------------|
| EIF4E3 | hsa-miR-497-5p    |
| EIF4E3 | hsa-miR-7052-5p   |
| EIF4E3 | hsa-miR-5583-5p   |
| EIF4E3 | hsa-miR-7063-3p   |
| EIF4E3 | hsa-miR-676-3p    |
| EIF4E3 | hsa-miR-30c-2-3p  |
| EIF4E3 | hsa-miR-216a-3p   |
| EIF4E3 | hsa-miR-3967      |
| EIF4E3 | hsa-miR-3200-5p   |
| EIF4E3 | hsa-miR-767       |
| EIF4E3 | hsa-miR-8829      |
| EIF4E3 | hsa-miR-7072-3p   |
| EIF4E3 | hsa-miR-2284z     |
| EIF4E3 | hsa-miR-150-5p    |
| EIF4E3 | hsa-miR-673-5p    |
| EIF4E3 | hsa-miR-124-3p.1  |
| EIF4E3 | hsa-miR-2054      |
| EIF4E3 | hsa-miR-186-5p    |
| EIF4E3 | hsa-miR-7117-5p   |
| EIF4E3 | hsa-miR-550b-2-5p |
| EIF4E3 | hsa-miR-3108-5p   |
| EIF4E3 | hsa-miR-106-5p    |
| EIF4E3 | hsa-miR-5620-3p   |
| EIF4E3 | hsa-miR-7030-3p   |
| EIF4E3 | hsa-miR-7684-5p   |
| EIF4E3 | hsa-miR-2406      |
| EIF4E3 | hsa-miR-6899-3p   |
| EIF4E3 | hsa-miR-135       |
| EIF4E3 | hsa-miR-1236-3p   |
| EIF4E3 | hsa-miR-1298-3p   |
| EIF4E3 | hsa-miR-518df-3p  |
| EIF4E3 | hsa-miR-7010-3p   |
| EIF4E3 | hsa-miR-517-5p    |
| EIF4E3 | hsa-miR-589-5p    |
| EIF4E3 | hsa-miR-6970-5p   |
| EIF4E3 | hsa-miR-200b-5p   |
| EIF4E3 | hsa-miR-6752-5p   |
| EIF4E3 | hsa-miR-95-3p     |
| EIF4E3 | hsa-miR-4795-3p   |
| EIF4E3 | hsa-miR-7-5p      |
| EIF4E3 | hsa-miR-4690-5p   |
| EIF4E3 | hsa-miR-702-5p    |
| EIF4E3 | hsa-miR-539-3p    |
| EIF4E3 | hsa-miR-514b-5p   |
| EIF4E3 | hsa-miR-758-3p    |
| EIF4E3 | hsa-miR-4685-3p   |

|        |                    |
|--------|--------------------|
| EIF4E3 | hsa-miR-670-3p     |
| EIF4E3 | hsa-miR-181        |
| EIF4E3 | hsa-miR-518-3p     |
| EIF4E3 | hsa-miR-6941-5p    |
| EIF4E3 | hsa-miR-550-5p     |
| EIF4E3 | hsa-miR-4652-3p    |
| EIF4E3 | hsa-miR-1603       |
| EIF4E3 | hsa-miR-5697       |
| EIF4E3 | hsa-miR-6362       |
| EIF4E3 | hsa-miR-1958       |
| EIF4E3 | hsa-miR-302a-5p    |
| EIF4E3 | hsa-miR-1728-3p    |
| EIF4E3 | hsa-miR-3145-5p    |
| EIF4E3 | hsa-miR-1964-5p    |
| EIF4E3 | hsa-miR-4668-3p    |
| EIF4E3 | hsa-miR-548h-5p    |
| EIF4E3 | hsa-miR-32-5p      |
| EIF4E3 | hsa-miR-513c-3p    |
| EIF4E3 | hsa-miR-8872       |
| EIF4E3 | hsa-miR-292a-3p    |
| EIF4E3 | hsa-miR-350-3p     |
| EIF4E3 | hsa-miR-4766-3p    |
| EIF4E3 | hsa-miR-3140-5p    |
| EIF4E3 | hsa-miR-876        |
| EIF4E3 | hsa-miR-6076       |
| EIF4E3 | hsa-miR-7342-5p    |
| EIF4E3 | hsa-miR-6997-3p    |
| EIF4E3 | hsa-miR-4768-5p    |
| EIF4E3 | hsa-miR-3065-5p    |
| EIF4E3 | hsa-miR-183-5p     |
| EIF4E3 | hsa-miR-8791       |
| EIF4E3 | hsa-miR-7094b-2-5p |
| EIF4E3 | hsa-miR-5006-3p    |
| EIF4E3 | hsa-miR-6805-5p    |
| EIF4E3 | hsa-miR-3200-3p    |
| EIF4E3 | hsa-miR-467b-5p    |
| EIF4E3 | hsa-miR-451b       |
| EIF4E3 | hsa-miR-7043-3p    |
| EIF4E3 | hsa-miR-491-5p     |
| EIF4E3 | hsa-miR-576-5p     |
| EIF4E3 | hsa-miR-4652-5p    |
| EIF4E3 | hsa-miR-8865       |
| EIF4E3 | hsa-miR-206        |
| EIF4E3 | hsa-miR-154-3p     |
| EIF4E3 | hsa-miR-20a-3p     |
| EIF4E3 | hsa-miR-5007-3p    |

|        |                  |
|--------|------------------|
| EIF4E3 | hsa-miR-518a-5p  |
| EIF4E3 | hsa-miR-7000-3p  |
| EIF4E3 | hsa-miR-3071-5p  |
| EIF4E3 | hsa-miR-196a-3p  |
| EIF4E3 | hsa-miR-3191-5p  |
| EIF4E3 | hsa-miR-8904a    |
| EIF4E3 | hsa-miR-1295b-5p |
| EIF4E3 | hsa-miR-181c-3p  |
| EIF4E3 | hsa-miR-1558     |
| EIF4E3 | hsa-miR-6989-5p  |
| EIF4E3 | hsa-miR-4434     |
| EIF4E3 | hsa-miR-361-5p   |
| EIF4E3 | hsa-miR-8847     |
| EIF4E3 | hsa-miR-1668-3p  |
| EIF4E3 | hsa-miR-3561-5p  |
| EIF4E3 | hsa-miR-137      |
| EIF4E3 | hsa-miR-6514-5p  |
| EIF4E3 | hsa-miR-8065     |
| EIF4E3 | hsa-miR-7226-5p  |
| EIF4E3 | hsa-miR-3472     |
| EIF4E3 | hsa-miR-881-3p   |
| EIF4E3 | hsa-miR-922      |
| EIF4E3 | hsa-miR-6985-5p  |
| EIF4E3 | hsa-miR-4646-5p  |
| EIF4E3 | hsa-miR-3089-3p  |
| EIF4E3 | hsa-miR-1839     |
| EIF4E3 | hsa-miR-143-3p   |
| EIF4E3 | hsa-miR-133-5p   |
| EIF4E3 | hsa-miR-1927     |
| EIF4E3 | hsa-miR-2470     |
| EIF4E3 | hsa-miR-4495     |
| EIF4E3 | hsa-miR-1584-5p  |
| EIF4E3 | hsa-miR-519d-5p  |
| EIF4E3 | hsa-miR-6071     |
| EIF4E3 | hsa-miR-6119-5p  |
| EIF4E3 | hsa-miR-939-5p   |
| EIF4E3 | hsa-miR-6525     |
| EIF4E3 | hsa-miR-139-3p   |
| EIF4E3 | hsa-miR-3913-5p  |
| EIF4E3 | hsa-miR-4791     |
| EIF4E3 | hsa-miR-4732-3p  |
| EIF4E3 | hsa-miR-1715-5p  |
| EIF4E3 | hsa-miR-1981-5p  |
| EIF4E3 | hsa-miR-4717-3p  |
| EIF4E3 | hsa-miR-593-3p   |
| EIF4E3 | hsa-miR-1589     |

|        |                   |
|--------|-------------------|
| EIF4E3 | hsa-miR-1955-3p   |
| EIF4E3 | hsa-miR-4432      |
| EIF4E3 | hsa-miR-548an     |
| EIF4E3 | hsa-miR-5692a     |
| EIF4E3 | hsa-miR-693-5p    |
| EIF4E3 | hsa-miR-7663-5p   |
| EIF4E3 | hsa-miR-3473      |
| EIF4E3 | hsa-miR-6862-3p   |
| EIF4E3 | hsa-miR-548as-3p  |
| EIF4E3 | hsa-miR-1193-3p   |
| EIF4E3 | hsa-miR-376a-2-5p |
| EIF4E3 | hsa-miR-7093-3p   |
| EIF4E3 | hsa-miR-709       |
| EIF4E3 | hsa-miR-2408      |
| EIF4E3 | hsa-miR-8863      |
| EIF4E3 | hsa-miR-370-5p    |
| EIF4E3 | hsa-miR-2284s     |
| EIF4E3 | hsa-miR-3105-3p   |
| EIF4E3 | hsa-miR-7334-5p   |
| EIF4E3 | hsa-miR-3076-5p   |
| EIF4E3 | hsa-miR-2350      |
| EIF4E3 | hsa-miR-466f-5p   |
| EIF4E3 | hsa-miR-335-5p    |
| EIF4E3 | hsa-miR-6332      |
| EIF4E3 | hsa-miR-7398i-3p  |
| EIF4E3 | hsa-miR-4481      |
| EIF4E3 | hsa-miR-6909-3p   |
| EIF4E3 | hsa-miR-7232-5p   |
| EIF4E3 | hsa-miR-4274      |
| EIF4E3 | hsa-miR-2284m     |
| EIF4E3 | hsa-miR-1-3p      |
| EIF4E3 | hsa-miR-6973b-5p  |
| EIF4E3 | hsa-miR-4715-3p   |
| EIF4E3 | hsa-miR-6862-5p   |
| EIF4E3 | hsa-miR-1544-3p   |
| EIF4E3 | hsa-miR-7347-3p   |
| EIF4E3 | hsa-miR-1252-3p   |
| EIF4E3 | hsa-miR-2329-3p   |
| EIF4E3 | hsa-miR-216c-5p   |
| EIF4E3 | hsa-miR-3590-5p   |
| EIF4E3 | hsa-miR-674-5p    |
| EIF4E3 | hsa-miR-5581-3p   |
| EIF4E3 | hsa-miR-301a-5p   |
| EIF4E3 | hsa-miR-2285af    |
| EIF4E3 | hsa-miR-8835      |
| EIF4E3 | hsa-miR-4745-5p   |

|        |                    |
|--------|--------------------|
| EIF4E3 | hsa-miR-582-3p     |
| EIF4E3 | hsa-miR-466aep-5p  |
| EIF4E3 | hsa-miR-6858-3p    |
| EIF4E3 | hsa-miR-1255       |
| EIF4E3 | hsa-miR-7397-3p    |
| EIF4E3 | hsa-miR-6810-3p    |
| EIF4E3 | hsa-miR-6995-3p    |
| EIF4E3 | hsa-miR-3188       |
| EIF4E3 | hsa-miR-4451       |
| EIF4E3 | hsa-miR-7252-5p    |
| EIF4E3 | hsa-miR-3925-3p    |
| EIF4E3 | hsa-miR-296-5p     |
| EIF4E3 | hsa-miR-7009-3p    |
| EIF4E3 | hsa-miR-694        |
| EIF4E3 | hsa-miR-2400       |
| EIF4E3 | hsa-miR-6409       |
| EIF4E3 | hsa-miR-4749-3p    |
| EIF4E3 | hsa-miR-149-5p     |
| EIF4E3 | hsa-miR-365-5p     |
| EIF4E3 | hsa-miR-599-5p     |
| EIF4E3 | hsa-miR-6404       |
| EIF4E3 | hsa-miR-7015-5p    |
| EIF4E3 | hsa-miR-6939-3p    |
| EIF4E3 | hsa-miR-580        |
| EIF4E3 | hsa-miR-1255b-2-3p |
| EIF4E3 | hsa-miR-1571       |
| EIF4E3 | hsa-miR-6992-5p    |
| EIF4E3 | hsa-miR-3070-2-3p  |
| EIF4E3 | hsa-miR-297-5p     |
| EIF4E3 | hsa-miR-15         |
| EIF4E3 | hsa-miR-1275       |
| EIF4E3 | hsa-miR-548a1      |
| EIF4E3 | hsa-miR-7195-3p    |
| EIF4E3 | hsa-miR-7060-3p    |
| EIF4E3 | hsa-miR-6721-5p    |
| EIF4E3 | hsa-miR-6880-5p    |
| EIF4E3 | hsa-miR-7275-5p    |
| EIF4E3 | hsa-miR-7373a-3p   |
| EIF4E3 | hsa-miR-351-5p     |
| EIF4E3 | hsa-miR-490-5p     |
| EIF4E3 | hsa-miR-7000-5p    |
| EIF4E3 | hsa-miR-4731-5p    |
| EIF4E3 | hsa-miR-466c-5p    |
| EIF4E3 | hsa-miR-4775       |
| EIF4E3 | hsa-miR-374b-5p    |
| EIF4E3 | hsa-miR-6776-3p    |

|        |                   |
|--------|-------------------|
| EIF4E3 | hsa-miR-769       |
| EIF4E3 | hsa-miR-4716-3p   |
| EIF4E3 | hsa-miR-6837-3p   |
| EIF4E3 | hsa-miR-548ab     |
| EIF4E3 | hsa-miR-328-5p    |
| EIF4E3 | hsa-miR-621       |
| EIF4E3 | hsa-miR-3569-3p   |
| EIF4E3 | hsa-miR-6600-3p   |
| EIF4E3 | hsa-miR-7028-3p   |
| EIF4E3 | hsa-miR-6072      |
| EIF4E3 | hsa-miR-6902-3p   |
| EIF4E3 | hsa-miR-549a      |
| EIF4E3 | hsa-miR-7384-3p   |
| EIF4E3 | hsa-miR-143-5p    |
| EIF4E3 | hsa-miR-7247-5p   |
| EIF4E3 | hsa-miR-125b-2-3p |
| EIF4E3 | hsa-miR-7661-5p   |
| EIF4E3 | hsa-miR-2335      |
| EIF4E3 | hsa-miR-210       |
| EIF4E3 | hsa-miR-130       |
| EIF4E3 | hsa-miR-6953-5p   |
| EIF4E3 | hsa-miR-6848-5p   |
| EIF4E3 | hsa-miR-6894-5p   |
| EIF4E3 | hsa-miR-6802-5p   |
| EIF4E3 | hsa-miR-6768-5p   |
| EIF4E3 | hsa-miR-677       |
| EIF4E3 | hsa-miR-548h-3p   |
| EIF4E3 | hsa-miR-2328-3p   |
| EIF4E3 | hsa-miR-2475      |
| EIF4E3 | hsa-miR-101b-3p.2 |
| EIF4E3 | hsa-miR-6740-3p   |
| EIF4E3 | hsa-miR-34b-5p    |
| EIF4E3 | hsa-miR-466mo-3p  |
| EIF4E3 | hsa-miR-3587      |
| EIF4E3 | hsa-miR-136-5p    |
| EIF4E3 | hsa-miR-700-5p    |
| EIF4E3 | hsa-miR-377-3p    |
| EIF4E3 | hsa-miR-2285c     |
| EIF4E3 | hsa-miR-7330-3p   |
| EIF4E3 | hsa-miR-571       |
| EIF4E3 | hsa-miR-3120-3p   |
| EIF4E3 | hsa-miR-496       |
| EIF4E3 | hsa-miR-6888-3p   |
| EIF4E3 | hsa-miR-563       |
| EIF4E3 | hsa-miR-3061-3p   |
| EIF4E3 | hsa-miR-3105-5p   |

|        |                  |
|--------|------------------|
| EIF4E3 | hsa-miR-7081-5p  |
| EIF4E3 | hsa-miR-6323     |
| EIF4E3 | hsa-miR-7171-3p  |
| EIF4E3 | hsa-miR-3551-3p  |
| EIF4E3 | hsa-miR-344-3p   |
| EIF4E3 | hsa-miR-6954-5p  |
| EIF4E3 | hsa-miR-8801     |
| EIF4E3 | hsa-miR-7041-3p  |
| EIF4E3 | hsa-miR-1323-5p  |
| EIF4E3 | hsa-miR-95       |
| EIF4E3 | hsa-miR-19b-5p   |
| EIF4E3 | hsa-miR-6343     |
| EIF4E3 | hsa-miR-6543-3p  |
| EIF4E3 | hsa-miR-8080     |
| EIF4E3 | hsa-miR-4633-5p  |
| EIF4E3 | hsa-miR-617      |
| EIF4E3 | hsa-miR-496-5p   |
| EIF4E3 | hsa-miR-2183     |
| EIF4E3 | hsa-miR-7154-3p  |
| EIF4E3 | hsa-miR-544-5p   |
| EIF4E3 | hsa-miR-7371d-5p |
| EIF4E3 | hsa-miR-6943-3p  |
| EIF4E3 | hsa-miR-6981-3p  |
| EIF4E3 | hsa-miR-7173-5p  |
| EIF4E3 | hsa-miR-3059-3p  |
| EIF4E3 | hsa-miR-3060-3p  |
| EIF4E3 | hsa-miR-208-5p   |
| EIF4E3 | hsa-miR-4423-5p  |
| EIF4E3 | hsa-miR-3171     |
| EIF4E3 | hsa-miR-770      |
| EIF4E3 | hsa-miR-6134     |
| EIF4E3 | hsa-miR-191-5p   |
| EIF4E3 | hsa-miR-5133     |
| EIF4E3 | hsa-miR-3607-3p  |
| EIF4E3 | hsa-miR-7655-3p  |
| EIF4E3 | hsa-miR-125      |
| EIF4E3 | hsa-miR-140-3p.1 |
| EIF4E3 | hsa-miR-495-5p   |
| EIF4E3 | hsa-miR-4499     |
| EIF4E3 | hsa-miR-517      |
| EIF4E3 | hsa-miR-1264-3p  |
| EIF4E3 | hsa-miR-2113     |
| EIF4E3 | hsa-miR-8843     |
| EIF4E3 | hsa-miR-1243-5p  |
| EIF4E3 | hsa-miR-3596c    |
| EIF4E3 | hsa-miR-873-5p   |



|        |                  |
|--------|------------------|
| EIF4E3 | hsa-miR-466q     |
| EIF4E3 | hsa-miR-300-5p   |
| EIF4E3 | hsa-miR-1968-3p  |
| EIF4E3 | hsa-miR-1272     |
| EIF4E3 | hsa-miR-5093     |
| EIF4E3 | hsa-miR-1902     |
| EIF4E3 | hsa-miR-6873-5p  |
| EIF4E3 | hsa-miR-1255b-5p |
| EIF4E3 | hsa-miR-6083     |
| EIF4E3 | hsa-miR-687      |
| EIF4E3 | hsa-miR-7187-3p  |
| EIF4E3 | hsa-miR-3124-3p  |
| EIF4E3 | hsa-miR-7213-3p  |
| EIF4E3 | hsa-miR-1205     |
| EIF4E3 | hsa-miR-515-3p   |
| EIF4E3 | hsa-miR-4750-3p  |
| EIF4E3 | hsa-miR-376c-3p  |
| EIF4E3 | hsa-miR-872      |
| EIF4E3 | hsa-miR-4769-3p  |
| EIF4E3 | hsa-miR-644a     |
| EIF4E3 | hsa-miR-548bb-5p |
| EIF4E3 | hsa-miR-8067     |
| EIF4E3 | hsa-miR-6995-5p  |
| EIF4E3 | hsa-miR-7386i-5p |
| EIF4E3 | hsa-miR-4728-3p  |
| EIF4E3 | hsa-miR-2116-3p  |
| EIF4E3 | hsa-miR-7289-5p  |
| EIF4E3 | hsa-miR-7032-3p  |
| EIF4E3 | hsa-miR-3604     |
| EIF4E3 | hsa-miR-4665-3p  |
| EIF4E3 | hsa-miR-4672     |
| EIF4E3 | hsa-miR-500b-5p  |
| EIF4E3 | hsa-miR-6633-5p  |
| EIF4E3 | hsa-miR-6861-3p  |
| EIF4E3 | hsa-miR-7274-5p  |
| EIF4E3 | hsa-miR-4521     |
| EIF4E3 | hsa-miR-8073     |
| EIF4E3 | hsa-miR-6400     |
| EIF4E3 | hsa-miR-200a-3p  |
| EIF4E3 | hsa-miR-667-5p   |
| EIF4E3 | hsa-miR-6771-3p  |
| EIF4E3 | hsa-miR-7283-3p  |
| EIF4E3 | hsa-miR-496-3p   |
| EIF4E3 | hsa-miR-19b-3p   |
| EIF4E3 | hsa-miR-6554-3p  |
| EIF4E3 | hsa-miR-7-3p     |

|        |                   |
|--------|-------------------|
| EIF4E3 | hsa-miR-8874      |
| EIF4E3 | hsa-miR-669b-5p   |
| EIF4E3 | hsa-miR-7316-5p   |
| EIF4E3 | hsa-miR-7331-2-3p |
| EIF4E3 | hsa-let-7b-3p     |
| EIF4E3 | hsa-miR-6127      |
| EIF4E3 | hsa-miR-4503      |
| EIF4E3 | hsa-miR-548g-3p   |
| EIF4E3 | hsa-miR-7641      |
| EIF4E3 | hsa-miR-6974-5p   |
| EIF4E3 | hsa-miR-2284i     |
| EIF4E3 | hsa-miR-450b-3p   |
| EIF4E3 | hsa-miR-7973      |
| EIF4E3 | hsa-miR-4298      |
| EIF4E3 | hsa-let-7a-2-3p   |
| EIF4E3 | hsa-miR-29e       |
| EIF4E3 | hsa-miR-5627-3p   |
| EIF4E3 | hsa-miR-193b-5p   |
| EIF4E3 | hsa-miR-5709-3p   |
| EIF4E3 | hsa-miR-4778-5p   |
| EIF4E3 | hsa-miR-6946-3p   |
| EIF4E3 | hsa-miR-8908c     |
| EIF4E3 | hsa-miR-3605-5p   |
| EIF4E3 | hsa-miR-6977-5p   |
| EIF4E3 | hsa-miR-7074-3p   |
| EIF4E3 | hsa-miR-3613b     |
| EIF4E3 | hsa-miR-6947-5p   |
| EIF4E3 | hsa-miR-4720-3p   |
| EIF4E3 | hsa-miR-6876-3p   |
| EIF4E3 | hsa-miR-7286-3p   |
| EIF4E3 | hsa-miR-181-3p    |
| EIF4E3 | hsa-miR-519e-3p   |
| EIF4E3 | hsa-miR-3148      |
| EIF4E3 | hsa-miR-5580-3p   |
| EIF4E3 | hsa-miR-9a-3p     |
| EIF4E3 | hsa-miR-519-3p    |
| EIF4E3 | hsa-miR-647       |
| EIF4E3 | hsa-miR-182-3p    |
| EIF4E3 | hsa-miR-7242-5p   |
| EIF4E3 | hsa-miR-7365-3p   |
| EIF4E3 | hsa-miR-2284ac    |
| EIF4E3 | hsa-miR-5586-3p   |
| EIF4E3 | hsa-miR-1273d     |
| EIF4E3 | hsa-miR-1249-3p   |
| EIF4E3 | hsa-miR-218-5p    |
| EIF4E3 | hsa-miR-7691      |

|        |                   |
|--------|-------------------|
| EIF4E3 | hsa-miR-6801-5p   |
| EIF4E3 | hsa-miR-4534      |
| EIF4E3 | hsa-miR-943       |
| EIF4E3 | hsa-miR-7336-5p   |
| EIF4E3 | hsa-miR-4659b-5p  |
| EIF4E3 | hsa-miR-371a-5p   |
| EIF4E3 | hsa-miR-6907-5p   |
| EIF4E3 | hsa-miR-4999-3p   |
| EIF4E3 | hsa-miR-3072-5p   |
| EIF4E3 | hsa-miR-19a-5p    |
| EIF4E3 | hsa-miR-7022-5p   |
| EIF4E3 | hsa-miR-892c-3p   |
| EIF4E3 | hsa-miR-365b-5p   |
| EIF4E3 | hsa-miR-2489      |
| EIF4E3 | hsa-miR-5011-3p   |
| EIF4E3 | hsa-miR-4474-3p   |
| EIF4E3 | hsa-miR-2486-3p   |
| EIF4E3 | hsa-miR-449c-3p   |
| EIF4E3 | hsa-miR-1842      |
| EIF4E3 | hsa-miR-875-5p    |
| EIF4E3 | hsa-miR-4760-3p   |
| EIF4E3 | hsa-miR-2303      |
| EIF4E3 | hsa-miR-6865-3p   |
| EIF4E3 | hsa-miR-486-5p    |
| EIF4E3 | hsa-miR-3609      |
| EIF4E3 | hsa-miR-628-5p    |
| EIF4E3 | hsa-miR-6804-3p   |
| EIF4E3 | hsa-miR-7054-5p   |
| EIF4E3 | hsa-miR-2299-5p   |
| EIF4E3 | hsa-miR-4422      |
| EIF4E3 | hsa-miR-8869      |
| EIF4E3 | hsa-miR-122-3p    |
| EIF4E3 | hsa-miR-7002-5p   |
| EIF4E3 | hsa-miR-452-5p    |
| EIF4E3 | hsa-miR-7324-3p   |
| EIF4E3 | hsa-miR-6350      |
| EIF4E3 | hsa-miR-7185-3p   |
| EIF4E3 | hsa-miR-4436b-3p  |
| EIF4E3 | hsa-miR-450a-2-3p |
| EIF4E3 | hsa-miR-503-5p    |
| EIF4E3 | hsa-miR-3130-3p   |
| EIF4E3 | hsa-miR-2115-5p   |
| EIF4E3 | hsa-miR-2110      |
| EIF4E3 | hsa-miR-3110-3p   |
| EIF4E3 | hsa-miR-583       |
| EIF4E3 | hsa-miR-4788      |

|        |                  |
|--------|------------------|
| EIF4E3 | hsa-miR-673-3p   |
| EIF4E3 | hsa-miR-212-3p   |
| EIF4E3 | hsa-miR-200-3p   |
| EIF4E3 | hsa-miR-6953-3p  |
| EIF4E3 | hsa-miR-586      |
| EIF4E3 | hsa-miR-4666a-5p |
| EIF4E3 | hsa-miR-3619-5p  |
| EIF4E3 | hsa-miR-324-3p   |
| EIF4E3 | hsa-miR-1897-5p  |
| EIF4E3 | hsa-miR-2320-5p  |
| EIF4E3 | hsa-miR-1983     |
| EIF4E3 | hsa-miR-200ac-5p |
| EIF4E3 | hsa-miR-8119     |
| EIF4E3 | hsa-miR-16-5p    |
| EIF4E3 | hsa-miR-382-5p   |
| EIF4E3 | hsa-miR-6883-3p  |
| EIF4E3 | hsa-miR-5092     |
| EIF4E3 | hsa-miR-8853     |
| EIF4E3 | hsa-miR-298-3p   |
| EIF4E3 | hsa-miR-2412     |
| EIF4E3 | hsa-miR-3578     |
| EIF4E3 | hsa-miR-890-3p   |
| EIF4E3 | hsa-miR-302c-3p  |
| EIF4E3 | hsa-miR-3714     |
| EIF4E3 | hsa-miR-3159     |
| EIF4E3 | hsa-miR-4755-5p  |
| EIF4E3 | hsa-miR-2447     |
| EIF4E3 | hsa-miR-200      |
| EIF4E3 | hsa-miR-7277-5p  |
| EIF4E3 | hsa-miR-7386g-3p |
| EIF4E3 | hsa-miR-510-3p   |
| EIF4E3 | hsa-miR-2898     |
| EIF4E3 | hsa-miR-8908f    |
| EIF4E3 | hsa-miR-7207-3p  |
| EIF4E3 | hsa-miR-377-5p   |
| EIF4E3 | hsa-miR-2425-5p  |
| EIF4E3 | hsa-miR-871-5p   |
| EIF4E3 | hsa-miR-6938-5p  |
| EIF4E3 | hsa-miR-4694-3p  |
| EIF4E3 | hsa-miR-467cd-5p |
| EIF4E3 | hsa-miR-505-3p   |
| EIF4E3 | hsa-miR-186-5p   |
| EIF4E3 | hsa-miR-6733-5p  |
| EIF4E3 | hsa-miR-7156-5p  |
| EIF4E3 | hsa-miR-344-5p   |
| EIF4E3 | hsa-miR-7063-5p  |

|        |                   |
|--------|-------------------|
| EIF4E3 | hsa-miR-488-5p    |
| EIF4E3 | hsa-miR-466-5p    |
| EIF4E3 | hsa-miR-450b      |
| EIF4E3 | hsa-miR-2114-3p   |
| EIF4E3 | hsa-miR-561-3p    |
| EIF4E3 | hsa-miR-4659b-3p  |
| EIF4E3 | hsa-miR-3058-3p   |
| EIF4E3 | hsa-miR-6917-5p   |
| EIF4E3 | hsa-miR-4421      |
| EIF4E3 | hsa-miR-707       |
| EIF4E3 | hsa-miR-9768-5p   |
| EIF4E3 | hsa-miR-6368      |
| EIF4E3 | hsa-miR-8893      |
| EIF4E3 | hsa-miR-597       |
| EIF4E3 | hsa-miR-509-3p    |
| EIF4E3 | hsa-miR-3100-3p   |
| EIF4E3 | hsa-miR-6912-3p   |
| EIF4E3 | hsa-miR-7051-3p   |
| EIF4E3 | hsa-miR-3165      |
| EIF4E3 | hsa-miR-6943-5p   |
| EIF4E3 | hsa-miR-2373-3p   |
| EIF4E3 | hsa-miR-6715b-3p  |
| EIF4E3 | hsa-miR-3572-3p   |
| EIF4E3 | hsa-miR-578       |
| EIF4E3 | hsa-miR-200a-5p   |
| EIF4E3 | hsa-miR-3689-3p   |
| EIF4E3 | hsa-miR-340-5p    |
| EIF4E3 | hsa-miR-2284x     |
| EIF4E3 | hsa-miR-548ac     |
| EIF4E3 | hsa-miR-760-3p    |
| EIF4E3 | hsa-miR-2285t     |
| EIF4E3 | hsa-miR-2284ab    |
| EIF4E3 | hsa-miR-548cej-3p |
| EIF4E3 | hsa-miR-1556      |
| EIF4E3 | hsa-miR-7386c-5p  |
| EIF4E3 | hsa-miR-669       |
| EIF4E3 | hsa-miR-7083-3p   |
| EIF4E3 | hsa-miR-324       |
| EIF4E3 | hsa-miR-6131      |
| EIF4E3 | hsa-miR-5186      |
| EIF4E3 | hsa-miR-2896      |
| EIF4E3 | hsa-miR-6842-3p   |
| EIF4E3 | hsa-miR-758-5p    |
| EIF4E3 | hsa-miR-6529b     |
| EIF4E3 | hsa-miR-582-5p    |
| EIF4E3 | hsa-miR-3594-5p   |

|        |                   |
|--------|-------------------|
| EIF4E3 | hsa-miR-1643a-5p  |
| EIF4E3 | hsa-miR-7217-5p   |
| EIF4E3 | hsa-miR-4731-3p   |
| EIF4E3 | hsa-miR-6751-5p   |
| EIF4E3 | hsa-miR-205-5p    |
| EIF4E3 | hsa-miR-198       |
| EIF4E3 | hsa-miR-3099      |
| EIF4E3 | hsa-miR-2285z     |
| EIF4E3 | hsa-miR-4661-5p   |
| EIF4E3 | hsa-miR-1197-3p   |
| EIF4E3 | hsa-miR-548l      |
| EIF4E3 | hsa-miR-7210-5p   |
| EIF4E3 | hsa-miR-1322      |
| EIF4E3 | hsa-miR-4443      |
| EIF4E3 | hsa-miR-8056      |
| EIF4E3 | hsa-miR-7466-3p   |
| EIF4E3 | hsa-miR-659-5p    |
| EIF4E3 | hsa-miR-222-3p    |
| EIF4E3 | hsa-miR-4539      |
| EIF4E3 | hsa-miR-200b-3p   |
| EIF4E3 | hsa-miR-876-5p    |
| EIF4E3 | hsa-miR-6902-5p   |
| EIF4E3 | hsa-miR-889-5p    |
| EIF4E3 | hsa-miR-331-3p    |
| EIF4E3 | hsa-miR-3577      |
| EIF4E3 | hsa-miR-202-5p    |
| EIF4E3 | hsa-miR-548d-3p   |
| EIF4E3 | hsa-miR-7360-5p   |
| EIF4E3 | hsa-miR-881-5p    |
| EIF4E3 | hsa-miR-4687-5p   |
| EIF4E3 | hsa-miR-7672-5p   |
| EIF4E3 | hsa-miR-7168-3p   |
| EIF4E3 | hsa-miR-196a-2-3p |
| EIF4E3 | hsa-miR-1912-5p   |
| EIF4E3 | hsa-miR-4802-5p   |
| EIF4E3 | hsa-miR-6416-3p   |
| EIF4E3 | hsa-miR-4473      |
| EIF4E3 | hsa-miR-7052-3p   |
| EIF4E3 | hsa-miR-4475      |
| EIF4E3 | hsa-miR-500-5p    |
| EIF4E3 | hsa-miR-7280-3p   |
| EIF4E3 | hsa-miR-1304-3p   |
| EIF4E3 | hsa-miR-7175-5p   |
| EIF4E3 | hsa-miR-4438      |
| EIF4E3 | hsa-miR-302-3p    |
| EIF4E3 | hsa-miR-6750-5p   |

|        |                  |
|--------|------------------|
| EIF4E3 | hsa-miR-7012-5p  |
| EIF4E3 | hsa-miR-144-3p   |
| EIF4E3 | hsa-miR-5193     |
| EIF4E3 | hsa-miR-323a-5p  |
| EIF4E3 | hsa-miR-1459     |
| EIF4E3 | hsa-miR-4753-5p  |
| EIF4E3 | hsa-miR-1910-3p  |
| EIF4E3 | hsa-miR-365a-3p  |
| EIF4E3 | hsa-miR-7456-5p  |
| EIF4E3 | hsa-miR-101-3p   |
| EIF4E3 | hsa-miR-467g     |
| EIF4E3 | hsa-miR-6568-3p  |
| EIF4E3 | hsa-miR-3062-5p  |
| EIF4E3 | hsa-miR-7666-3p  |
| EIF4E3 | hsa-miR-892-3p   |
| EIF4E3 | hsa-miR-5130     |
| EIF4E3 | hsa-miR-500-3p   |
| EIF4E3 | hsa-miR-616-5p   |
| EIF4E3 | hsa-miR-580-5p   |
| EIF4E3 | hsa-miR-7164-5p  |
| EIF4E3 | hsa-miR-3617-3p  |
| EIF4E3 | hsa-miR-4742     |
| EIF4E3 | hsa-miR-7374-5p  |
| EIF4E3 | hsa-miR-290      |
| EIF4E3 | hsa-miR-34       |
| EIF4E3 | hsa-miR-6768-3p  |
| EIF4E3 | hsa-miR-526      |
| EIF4E3 | hsa-miR-3057-3p  |
| EIF4E3 | hsa-miR-7667-3p  |
| EIF4E3 | hsa-miR-101-3p.1 |
| EIF4E3 | hsa-miR-95-5p    |
| EIF4E3 | hsa-miR-3679-3p  |
| EIF4E3 | hsa-miR-1266-3p  |
| EIF4E3 | hsa-miR-669hk-3p |
| EIF4E3 | hsa-miR-686      |
| EIF4E3 | hsa-miR-6945-3p  |
| EIF4E3 | hsa-miR-5583-3p  |
| EIF4E3 | hsa-miR-301-3p   |
| EIF4E3 | hsa-miR-6972-5p  |
| EIF4E3 | hsa-miR-6853-3p  |
| EIF4E3 | hsa-miR-302d-5p  |
| EIF4E3 | hsa-miR-7109-3p  |
| EIF4E3 | hsa-miR-6836-3p  |
| EIF4E3 | hsa-miR-1906     |
| EIF4E3 | hsa-miR-885      |
| EIF4E3 | hsa-miR-4758-5p  |

|        |                  |
|--------|------------------|
| EIF4E3 | hsa-miR-383      |
| EIF4E3 | hsa-miR-34c-3p   |
| EIF4E3 | hsa-miR-4680     |
| EIF4E3 | hsa-miR-1283a    |
| EIF4E3 | hsa-miR-1302     |
| EIF4E3 | hsa-miR-432-3p   |
| EIF4E3 | hsa-miR-7344-5p  |
| EIF4E3 | hsa-miR-1178-5p  |
| EIF4E3 | hsa-miR-7386j-3p |
| EIF4E3 | hsa-miR-6074     |
| EIF4E3 | hsa-miR-28-3p    |
| EIF4E3 | hsa-miR-3185     |
| EIF4E3 | hsa-miR-6885-5p  |
| EIF4E3 | hsa-miR-651-3p   |
| EIF4E3 | hsa-miR-491-5p   |
| EIF4E3 | hsa-miR-376b-5p  |
| EIF4E3 | hsa-miR-875-3p   |
| EIF4E3 | hsa-miR-6529-3p  |
| EIF4E3 | hsa-miR-5572     |
| EIF4E3 | hsa-miR-381-5p   |
| EIF4E3 | hsa-miR-302f     |
| EIF4E3 | hsa-miR-6955-3p  |
| EIF4E3 | hsa-miR-548x-5p  |
| EIF4E3 | hsa-miR-7978     |
| EIF4E3 | hsa-miR-1303     |
| EIF4E3 | hsa-miR-148a-3p  |
| EIF4E3 | hsa-miR-518-5p   |
| EIF4E3 | hsa-miR-4695-3p  |
| EIF4E3 | hsa-miR-7463-3p  |
| EIF4E3 | hsa-miR-329a     |
| EIF4E3 | hsa-miR-3612     |
| EIF4E3 | hsa-miR-98-5p    |
| EIF4E3 | hsa-miR-378b     |
| EIF4E3 | hsa-miR-6802-3p  |
| EIF4E3 | hsa-miR-7087-5p  |
| EIF4E3 | hsa-miR-7363-5p  |
| EIF4E3 | hsa-miR-4659a-3p |
| EIF4E3 | hsa-miR-552-5p   |
| EIF4E3 | hsa-miR-302bd    |
| EIF4E3 | hsa-miR-19-3p    |
| EIF4E3 | hsa-miR-3924     |
| EIF4E3 | hsa-miR-637      |
| EIF4E3 | hsa-miR-208b-3p  |
| EIF4E3 | hsa-miR-1229-3p  |
| EIF4E3 | hsa-miR-32-3p    |
| EIF4E3 | hsa-miR-7064-3p  |



|        |                   |
|--------|-------------------|
| EIF4E3 | hsa-miR-7319-3p   |
| EIF4E3 | hsa-miR-6837-5p   |
| EIF4E3 | hsa-miR-27        |
| EIF4E3 | hsa-miR-6874-3p   |
| EIF4E3 | hsa-miR-3572      |
| EIF4E3 | hsa-miR-627-5p    |
| EIF4E3 | hsa-miR-6764-3p   |
| EIF4E3 | hsa-miR-196-3p    |
| EIF4E3 | hsa-miR-496.2     |
| EIF4E3 | hsa-miR-497-5p    |
| EIF4E3 | hsa-miR-504-3p    |
| EIF4E3 | hsa-miR-492       |
| EIF4E3 | hsa-miR-7159-5p   |
| EIF4E3 | hsa-miR-680       |
| EIF4E3 | hsa-miR-539-5p    |
| EIF4E3 | hsa-miR-7681-3p   |
| EIF4E3 | hsa-miR-4778-3p   |
| EIF4E3 | hsa-miR-6928-5p   |
| EIF4E3 | hsa-miR-361-5p    |
| EIF4E3 | hsa-miR-434-3p    |
| EIF4E3 | hsa-miR-7681-5p   |
| EIF4E3 | hsa-miR-1932      |
| EIF4E3 | hsa-miR-876-3p    |
| EIF4E3 | hsa-miR-8824      |
| EIF4E3 | hsa-miR-7297-5p   |
| EIF4E3 | hsa-miR-3965      |
| EIF4E3 | hsa-miR-1732      |
| EIF4E3 | hsa-miR-327       |
| EIF4E3 | hsa-miR-147a      |
| EIF4E3 | hsa-miR-4520-2-3p |
| EIF4E3 | hsa-miR-4251      |
| EIF4E3 | hsa-miR-6929-3p   |
| EIF4E3 | hsa-miR-2382-3p   |
| EIF4E3 | hsa-miR-33        |
| EIF4E3 | hsa-miR-425-3p    |
| EIF4E3 | hsa-miR-6818-3p   |
| EIF4E3 | hsa-miR-9-5p      |
| EIF4E3 | hsa-miR-7862      |
| EIF4E3 | hsa-miR-1255-5p   |
| EIF4E3 | hsa-miR-20-5p     |
| EIF4E3 | hsa-miR-2429      |
| EIF4E3 | hsa-miR-7229-3p   |
| EIF4E3 | hsa-miR-2294      |
| EIF4E3 | hsa-miR-7258-5p   |
| EIF4E3 | hsa-miR-6738-3p   |
| EIF4E3 | hsa-miR-6913-5p   |

|        |                 |
|--------|-----------------|
| EIF4E3 | hsa-miR-7017-3p |
| EIF4E3 | hsa-miR-561-5p  |
| EIF4E3 | hsa-miR-2291    |
| EIF4E3 | hsa-miR-6940-5p |
| EIF4E3 | hsa-miR-3678-3p |
| EIF4E3 | hsa-miR-2450c   |
| EIF4E3 | hsa-miR-6237    |
| EIF4E3 | hsa-miR-883-3p  |
| EIF4E3 | hsa-miR-3541    |
| EIF4E3 | hsa-miR-3596    |
| EIF4E3 | hsa-miR-4708-3p |
| EIF4E3 | hsa-miR-7379-5p |
| EIF4E3 | hsa-miR-3911    |
| EIF4E3 | hsa-miR-880-3p  |
| EIF4E3 | hsa-miR-5590-5p |
| EIF4E3 | hsa-miR-3106-5p |
| EIF4E3 | hsa-miR-4310    |
| EIF4E3 | hsa-miR-221-5p  |
| EIF4E3 | hsa-miR-2347    |
| EIF4E3 | hsa-miR-7659-3p |
| EIF4E3 | hsa-miR-466g    |
| EIF4E3 | hsa-miR-8799    |
| EIF4E3 | hsa-miR-6875-3p |
| EIF4E3 | hsa-miR-1639    |
| EIF4E3 | hsa-miR-3591    |
| EIF4E3 | hsa-miR-2398    |
| EIF4E3 | hsa-miR-3098-5p |
| EIF4E3 | hsa-miR-675-3p  |
| EIF4E3 | hsa-miR-222-3p  |
| EIF4E3 | hsa-miR-7355-3p |
| EIF4E3 | hsa-miR-6730-5p |
| EIF4E3 | hsa-miR-7281-3p |
| EIF4E3 | hsa-miR-5114    |
| EIF4E3 | hsa-miR-5582-3p |
| EIF4E3 | hsa-miR-8793    |
| EIF4E3 | hsa-miR-8120    |
| EIF4E3 | hsa-miR-5579-5p |
| EIF4E3 | hsa-miR-145-5p  |
| EIF4E3 | hsa-miR-9769-5p |
| EIF4E3 | hsa-miR-465-3p  |
| EIF4E3 | hsa-miR-7705    |
| EIF4E3 | hsa-miR-2378    |
| EIF4E3 | hsa-miR-1249-3p |
| EIF4E3 | hsa-miR-6719-3p |
| EIF4E3 | hsa-miR-7380-3p |
| EIF4E3 | hsa-miR-2317    |

|        |                   |
|--------|-------------------|
| EIF4E3 | hsa-miR-6737-5p   |
| EIF4E3 | hsa-miR-8905      |
| EIF4E3 | hsa-miR-376c      |
| EIF4E3 | hsa-miR-369-3p    |
| EIF4E3 | hsa-miR-7155-5p   |
| EIF4E3 | hsa-miR-3166      |
| EIF4E3 | hsa-miR-761       |
| EIF4E3 | hsa-miR-183-5p    |
| EIF4E3 | hsa-miR-5187-3p   |
| EIF4E3 | hsa-miR-103a-2-5p |
| EIF4E3 | hsa-miR-1191b-5p  |
| EIF4E3 | hsa-miR-888-5p    |
| EIF4E3 | hsa-miR-4302      |
| EIF4E3 | hsa-miR-3559-5p   |
| EIF4E3 | hsa-miR-7020-5p   |
| EIF4E3 | hsa-miR-1247-3p   |
| EIF4E3 | hsa-miR-8817      |
| EIF4E3 | hsa-miR-7371a-3p  |
| EIF4E3 | hsa-miR-589-3p    |
| EIF4E3 | hsa-miR-188-5p    |
| EIF4E3 | hsa-miR-4773      |
| EIF4E3 | hsa-miR-2117      |
| EIF4E3 | hsa-miR-6128      |
| EIF4E3 | hsa-miR-5100      |
| EIF4E3 | hsa-miR-6516-5p   |
| EIF4E3 | hsa-miR-548f-5p   |
| EIF4E3 | hsa-miR-7046-3p   |
| EIF4E3 | hsa-miR-7258-3p   |
| EIF4E3 | hsa-miR-7371-3p   |
| EIF4E3 | hsa-miR-1759-3p   |
| EIF4E3 | hsa-miR-2427      |
| EIF4E3 | hsa-miR-485       |
| EIF4E3 | hsa-miR-541-5p    |
| EIF4E3 | hsa-miR-3973      |
| EIF4E3 | hsa-miR-7231-5p   |
| EIF4E3 | hsa-miR-7292-5p   |
| EIF4E3 | hsa-miR-7371b-3p  |
| EIF4E3 | hsa-miR-1265      |
| EIF4E3 | hsa-miR-4748      |
| EIF4E3 | hsa-miR-5113      |
| EIF4E3 | hsa-miR-697       |
| EIF4E3 | hsa-miR-548ar-3p  |
| EIF4E3 | hsa-miR-1251-5p   |
| EIF4E3 | hsa-miR-302c-3p.2 |
| EIF4E3 | hsa-miR-449a      |
| EIF4E3 | hsa-miR-1295b-3p  |

|        |                  |
|--------|------------------|
| EIF4E3 | hsa-miR-6974-3p  |
| EIF4E3 | hsa-miR-8892     |
| EIF4E3 | hsa-miR-2352     |
| EIF4E3 | hsa-miR-5004-3p  |
| EIF4E3 | hsa-miR-6939-5p  |
| EIF4E3 | hsa-miR-3136-5p  |
| EIF4E3 | hsa-miR-522-3p   |
| EIF4E3 | hsa-miR-1933-3p  |
| EIF4E3 | hsa-miR-7371b-5p |
| EIF4E3 | hsa-miR-3112-5p  |
| EIF4E3 | hsa-miR-7013-5p  |
| EIF4E3 | hsa-miR-7386-5p  |
| EIF4E3 | hsa-miR-562      |
| EIF4E3 | hsa-miR-380      |
| EIF4E3 | hsa-miR-3586-5p  |
| EIF4E3 | hsa-miR-6980-5p  |
| EIF4E3 | hsa-miR-4801     |
| EIF4E3 | hsa-miR-6418-3p  |
| EIF4E3 | hsa-miR-5104     |
| EIF4E3 | hsa-miR-7703     |
| EIF4E3 | hsa-miR-1343-3p  |
| EIF4E3 | hsa-miR-1747-3p  |
| EIF4E3 | hsa-miR-3600     |
| EIF4E3 | hsa-miR-373-5p   |
| EIF4E3 | hsa-miR-4252     |
| EIF4E3 | hsa-miR-202-3p   |
| EIF4E3 | hsa-miR-6887-5p  |
| EIF4E3 | hsa-miR-8820     |
| EIF4E3 | hsa-miR-6355     |
| EIF4E3 | hsa-miR-519      |
| EIF4E3 | hsa-miR-582-5p   |
| EIF4E3 | hsa-miR-6960-5p  |
| EIF4E3 | hsa-miR-3607-5p  |
| EIF4E3 | hsa-miR-548a-3p  |
| EIF4E3 | hsa-miR-7859     |
| EIF4E3 | hsa-miR-7344-3p  |
| EIF4E3 | hsa-miR-7398p-5p |
| EIF4E3 | hsa-miR-2116-5p  |
| EIF4E3 | hsa-miR-4260     |
| EIF4E3 | hsa-miR-500a-5p  |
| EIF4E3 | hsa-miR-4722-3p  |
| EIF4E3 | hsa-miR-548c-5p  |
| EIF4E3 | hsa-miR-7476-3p  |
| EIF4E3 | hsa-miR-3064     |
| EIF4E3 | hsa-miR-7284-3p  |
| EIF4E3 | hsa-miR-8070     |

|        |                  |
|--------|------------------|
| EIF4E3 | hsa-miR-129b-3p  |
| EIF4E3 | hsa-miR-33-3p    |
| EIF4E3 | hsa-miR-4491     |
| EIF4E3 | hsa-miR-6868-3p  |
| EIF4E3 | hsa-miR-672-5p   |
| EIF4E3 | hsa-miR-4254     |
| EIF4E3 | hsa-miR-669d-5p  |
| EIF4E3 | hsa-miR-3535     |
| EIF4E3 | hsa-miR-125-5p   |
| EIF4E3 | hsa-miR-1226-3p  |
| EIF4E3 | hsa-miR-2287     |
| EIF4E3 | hsa-miR-6795-5p  |
| EIF4E3 | hsa-miR-3557-5p  |
| EIF4E3 | hsa-miR-2324     |
| EIF4E3 | hsa-miR-6973b-3p |
| EIF4E3 | hsa-miR-2682-3p  |
| EIF4E3 | hsa-miR-605-3p   |
| EIF4E3 | hsa-miR-4699-5p  |
| EIF4E3 | hsa-miR-2330-5p  |
| EIF4E3 | hsa-miR-3664-5p  |
| EIF4E3 | hsa-miR-3971     |
| EIF4E3 | hsa-miR-4488     |
| EIF4E3 | hsa-miR-7259-5p  |
| EIF4E3 | hsa-miR-2467-3p  |
| EIF4E3 | hsa-miR-2448-3p  |
| EIF4E3 | hsa-miR-4505     |
| EIF4E3 | hsa-miR-2293     |
| EIF4E3 | hsa-miR-7039-3p  |
| EIF4E3 | hsa-miR-708-5p   |
| EIF4E3 | hsa-miR-2455     |
| EIF4E3 | hsa-miR-513a-3p  |
| EIF4E3 | hsa-miR-7286-5p  |
| EIF4E3 | hsa-miR-4447     |
| EIF4E3 | hsa-miR-3583-3p  |
| EIF4E3 | hsa-miR-202-3p   |
| EIF4E3 | hsa-miR-4680-5p  |
| EIF4E3 | hsa-miR-4716     |
| EIF4E3 | hsa-miR-4477b    |
| EIF4E3 | hsa-miR-219-2-3p |
| EIF4E3 | hsa-miR-3926     |
| EIF4E3 | hsa-miR-8831     |
| EIF4E3 | hsa-miR-6405     |
| EIF4E3 | hsa-miR-371      |
| EIF4E3 | hsa-miR-2468     |
| EIF4E3 | hsa-miR-221-3p   |
| EIF4E3 | hsa-miR-8792     |

|        |                  |
|--------|------------------|
| EIF4E3 | hsa-miR-7045-3p  |
| EIF4E3 | hsa-miR-2285y    |
| EIF4E3 | hsa-miR-3680-3p  |
| EIF4E3 | hsa-miR-944      |
| EIF4E3 | hsa-miR-7073-5p  |
| EIF4E3 | hsa-miR-519e-5p  |
| EIF4E3 | hsa-miR-3083-5p  |
| EIF4E3 | hsa-miR-7687-5p  |
| EIF4E3 | hsa-miR-6908-5p  |
| EIF4E3 | hsa-miR-643      |
| EIF4E3 | hsa-miR-3143     |
| EIF4E3 | hsa-miR-3558-5p  |
| EIF4E3 | hsa-miR-7386g-5p |
| EIF4E3 | hsa-miR-336-3p   |
| EIF4E3 | hsa-miR-2473     |
| EIF4E3 | hsa-miR-7680-5p  |
| EIF4E3 | hsa-miR-1323-3p  |
| EIF4E3 | hsa-miR-7086-5p  |
| EIF4E3 | hsa-miR-6810-5p  |
| EIF4E3 | hsa-miR-2285d    |
| EIF4E3 | hsa-miR-2365     |
| EIF4E3 | hsa-miR-891a-5p  |
| EIF4E3 | hsa-miR-6833-5p  |
| EIF4E3 | hsa-miR-219-5p   |
| EIF4E3 | hsa-miR-4711-3p  |
| EIF4E3 | hsa-miR-3543     |
| EIF4E3 | hsa-miR-4688     |
| EIF4E3 | hsa-miR-5101     |
| EIF4E3 | hsa-miR-548ao-3p |
| EIF4E3 | hsa-miR-1208     |
| EIF4E3 | hsa-miR-3941     |
| EIF4E3 | hsa-miR-1542-5p  |
| EIF4E3 | hsa-miR-296-3p   |
| EIF4E3 | hsa-miR-6880-3p  |
| EIF4E3 | hsa-miR-615-3p   |
| EIF4E3 | hsa-miR-139-5p   |
| EIF4E3 | hsa-miR-22-3p    |
| EIF4E3 | hsa-miR-16-2-3p  |
| EIF4E3 | hsa-miR-5123     |
| EIF4E3 | hsa-miR-7437-3p  |
| EIF4E3 | hsa-miR-5088-3p  |
| EIF4E3 | hsa-miR-196b-3p  |
| EIF4E3 | hsa-miR-1252     |
| EIF4E3 | hsa-miR-7021-3p  |
| EIF4E3 | hsa-miR-6819-3p  |
| EIF4E3 | hsa-miR-193-3p   |

|        |                  |
|--------|------------------|
| EIF4E3 | hsa-miR-7035-5p  |
| EIF4E3 | hsa-miR-2318     |
| EIF4E3 | hsa-miR-519-5p   |
| EIF4E3 | hsa-miR-7370i-3p |
| EIF4E3 | hsa-miR-8800     |
| EIF4E3 | hsa-miR-7194-3p  |
| EIF4E3 | hsa-miR-7092-3p  |
| EIF4E3 | hsa-miR-4793-5p  |
| EIF4E3 | hsa-miR-7110-5p  |
| EIF4E3 | hsa-miR-26a-3p   |
| EIF4E3 | hsa-miR-3593-5p  |
| EIF4E3 | hsa-miR-5192     |
| EIF4E3 | hsa-miR-2339     |
| EIF4E3 | hsa-miR-4423     |
| EIF4E3 | hsa-miR-4666b    |
| EIF4E3 | hsa-miR-6782-5p  |
| EIF4E3 | hsa-miR-6541     |
| EIF4E3 | hsa-miR-6796-3p  |
| EIF4E3 | hsa-miR-628-3p   |
| EIF4E3 | hsa-miR-6702-5p  |
| EIF4E3 | hsa-miR-6888-5p  |
| EIF4E3 | hsa-miR-148b-5p  |
| EIF4E3 | hsa-miR-3685     |
| EIF4E3 | hsa-miR-7386e-5p |
| EIF4E3 | hsa-miR-6898-3p  |
| EIF4E3 | hsa-miR-1721     |
| EIF4E3 | hsa-miR-4803     |
| EIF4E3 | hsa-miR-3542     |
| EIF4E3 | hsa-miR-6672-3p  |
| EIF4E3 | hsa-miR-2128     |
| EIF4E3 | hsa-miR-452-3p   |
| EIF4E3 | hsa-miR-16-5p    |
| EIF4E3 | hsa-miR-766-5p   |
| EIF4E3 | hsa-miR-3585-3p  |
| EIF4E3 | hsa-miR-6951-3p  |
| EIF4E3 | hsa-miR-29b-5p   |
| EIF4E3 | hsa-miR-7033-3p  |
| EIF4E3 | hsa-miR-3135a    |
| EIF4E3 | hsa-miR-7242-3p  |
| EIF4E3 | hsa-miR-1296     |
| EIF4E3 | hsa-miR-8855     |
| EIF4E3 | hsa-miR-8054     |
| EIF4E3 | hsa-miR-7010-5p  |
| EIF4E3 | hsa-miR-425      |
| EIF4E3 | hsa-miR-2362     |
| EIF4E3 | hsa-miR-4424     |

|        |                  |
|--------|------------------|
| EIF4E3 | hsa-miR-93-3p    |
| EIF4E3 | hsa-miR-8899     |
| EIF4E3 | hsa-miR-3584-5p  |
| EIF4E3 | hsa-miR-6800-3p  |
| EIF4E3 | hsa-miR-6794-3p  |
| EIF4E3 | hsa-miR-151      |
| EIF4E3 | hsa-miR-294      |
| EIF4E3 | hsa-miR-8066     |
| EIF4E3 | hsa-miR-7668-5p  |
| EIF4E3 | hsa-miR-5581-5p  |
| EIF4E3 | hsa-miR-6507-3p  |
| EIF4E3 | hsa-miR-548e-5p  |
| EIF4E3 | hsa-miR-1681     |
| EIF4E3 | hsa-miR-3071-3p  |
| EIF4E3 | hsa-miR-548au-3p |
| EIF4E3 | hsa-miR-559      |
| EIF4E3 | hsa-miR-490-3p   |
| EIF4E3 | hsa-miR-4742-5p  |
| EIF4E3 | hsa-miR-3097-5p  |
| EIF4E3 | hsa-miR-3180-5p  |
| EIF4E3 | hsa-miR-1684-3p  |
| EIF4E3 | hsa-miR-554      |
| EIF4E3 | hsa-miR-449a-3p  |
| EIF4E3 | hsa-miR-1580     |
| EIF4E3 | hsa-miR-499b-5p  |
| EIF4E3 | hsa-miR-133cd-5p |
| EIF4E3 | hsa-miR-4418     |
| EIF4E3 | hsa-miR-550-3p   |
| EIF4E3 | hsa-miR-347      |
| EIF4E3 | hsa-miR-122-5p   |
| EIF4E3 | hsa-miR-940      |
| EIF4E3 | hsa-miR-7088-5p  |
| EIF4E3 | hsa-miR-498      |
| EIF4E3 | hsa-miR-4441     |
| EIF4E3 | hsa-miR-6516     |
| EIF4E3 | hsa-miR-2285m    |
| EIF4E3 | hsa-miR-6819-5p  |
| EIF4E3 | hsa-miR-133-3p   |
| EIF4E3 | hsa-miR-4653-3p  |
| EIF4E3 | hsa-miR-6933-5p  |
| EIF4E3 | hsa-miR-6534     |
| EIF4E3 | hsa-miR-766-3p   |
| EIF4E3 | hsa-miR-200ab-5p |
| EIF4E3 | hsa-miR-1969     |
| EIF4E3 | hsa-miR-344g-3p  |
| EIF4E3 | hsa-miR-7234-5p  |



|        |                  |
|--------|------------------|
| EIF4E3 | hsa-miR-7243-3p  |
| EIF4E3 | hsa-miR-3691-5p  |
| EIF4E3 | hsa-miR-330-3p   |
| EIF4E3 | hsa-miR-330-3p.1 |
| EIF4E3 | hsa-miR-656      |
| EIF4E3 | hsa-miR-3057-5p  |
| EIF4E3 | hsa-miR-27-3p    |
| EIF4E3 | hsa-miR-30e      |
| EIF4E3 | hsa-miR-199-3p   |
| EIF4E3 | hsa-miR-2368-3p  |
| EIF4E3 | hsa-miR-3547-3p  |
| EIF4E3 | hsa-miR-7651-3p  |
| EIF4E3 | hsa-miR-936      |
| EIF4E3 | hsa-miR-4420     |
| EIF4E3 | hsa-miR-8825     |
| EIF4E3 | hsa-miR-511-5p   |
| EIF4E3 | hsa-miR-3560     |
| EIF4E3 | hsa-miR-6904-3p  |
| EIF4E3 | hsa-miR-892-5p   |
| EIF4E3 | hsa-miR-2284v    |
| EIF4E3 | hsa-miR-7154-5p  |
| EIF4E3 | hsa-miR-7660-5p  |
| EIF4E3 | hsa-miR-466f     |
| EIF4E3 | hsa-miR-1185-3p  |
| EIF4E3 | hsa-miR-7333-5p  |
| EIF4E3 | hsa-miR-6316     |
| EIF4E3 | hsa-miR-7307-3p  |
| EIF4E3 | hsa-miR-4650-3p  |
| EIF4E3 | hsa-miR-523-3p   |
| EIF4E3 | hsa-miR-6891-3p  |
| EIF4E3 | hsa-miR-548z     |
| EIF4E3 | hsa-miR-4668-5p  |
| EIF4E3 | hsa-miR-4476     |
| EIF4E3 | hsa-miR-3150a-3p |
| EIF4E3 | hsa-miR-5710     |
| EIF4E3 | hsa-miR-290b-3p  |
| EIF4E3 | hsa-miR-7283-5p  |
| EIF4E3 | hsa-miR-6535     |
| EIF4E3 | hsa-miR-140-3p   |
| EIF4E3 | hsa-miR-3067-5p  |
| EIF4E3 | hsa-miR-3667-3p  |
| EIF4E3 | hsa-miR-5580-5p  |
| EIF4E3 | hsa-miR-3190-3p  |
| EIF4E3 | hsa-miR-5002-5p  |
| EIF4E3 | hsa-miR-376b-3p  |
| EIF4E3 | hsa-miR-505-3p.2 |

|        |                  |
|--------|------------------|
| EIF4E3 | hsa-miR-3104-5p  |
| EIF4E3 | hsa-miR-134-3p   |
| EIF4E3 | hsa-miR-1909-3p  |
| EIF4E3 | hsa-miR-3652     |
| EIF4E3 | hsa-miR-324-5p   |
| EIF4E3 | hsa-miR-525-5p   |
| EIF4E3 | hsa-miR-7975     |
| EIF4E3 | hsa-miR-7370-3p  |
| EIF4E3 | hsa-miR-542      |
| EIF4E3 | hsa-miR-6981-5p  |
| EIF4E3 | hsa-miR-743a-3p  |
| EIF4E3 | hsa-miR-650      |
| EIF4E3 | hsa-miR-548aj-3p |
| EIF4E3 | hsa-miR-6966-3p  |
| EIF4E3 | hsa-miR-4789-3p  |
| EIF4E3 | hsa-miR-7004-3p  |
| EIF4E3 | hsa-miR-8900     |
| EIF4E3 | hsa-miR-570-5p   |
| EIF4E3 | hsa-miR-548ak    |
| EIF4E3 | hsa-miR-431-5p   |
| EIF4E3 | hsa-miR-2461-5p  |
| EIF4E3 | hsa-miR-6728-5p  |
| EIF4E3 | hsa-miR-4691-5p  |
| EIF4E3 | hsa-miR-214-3p   |
| EIF4E3 | hsa-miR-885-3p   |
| EIF4E3 | hsa-miR-706      |
| EIF4E3 | hsa-miR-7329-3p  |
| EIF4E3 | hsa-miR-505-3p   |
| EIF4E3 | hsa-miR-8821     |
| EIF4E3 | hsa-miR-103b     |
| EIF4E3 | hsa-miR-6934-5p  |
| EIF4E3 | hsa-miR-4726-3p  |
| EIF4E3 | hsa-miR-1245b-3p |
| EIF4E3 | hsa-miR-878-3p   |
| EIF4E3 | hsa-miR-1843a-5p |
| EIF4E3 | hsa-miR-6992-3p  |
| EIF4E3 | hsa-miR-1434-5p  |
| EIF4E3 | hsa-miR-6528     |
| EIF4E3 | hsa-miR-3183     |
| EIF4E3 | hsa-miR-519e-3p  |
| EIF4E3 | hsa-miR-367-3p   |
| EIF4E3 | hsa-miR-138-3p   |
| EIF4E3 | hsa-miR-2393     |
| EIF4E3 | hsa-miR-9768-3p  |
| EIF4E3 | hsa-miR-7652-5p  |
| EIF4E3 | hsa-miR-322-5p   |

|        |                   |
|--------|-------------------|
| EIF4E3 | hsa-miR-7398q-3p  |
| EIF4E3 | hsa-miR-30-5p     |
| EIF4E3 | hsa-miR-6987-5p   |
| EIF4E3 | hsa-miR-7398l-3p  |
| EIF4E3 | hsa-miR-193b-3p   |
| EIF4E3 | hsa-miR-612       |
| EIF4E3 | hsa-miR-3179      |
| EIF4E3 | hsa-miR-3548      |
| EIF4E3 | hsa-miR-548ap-5p  |
| EIF4E3 | hsa-miR-3147      |
| EIF4E3 | hsa-miR-1226-3p   |
| EIF4E3 | hsa-miR-6728-3p   |
| EIF4E3 | hsa-miR-6749-3p   |
| EIF4E3 | hsa-miR-299-3p    |
| EIF4E3 | hsa-miR-30-3p     |
| EIF4E3 | hsa-miR-291-5p    |
| EIF4E3 | hsa-miR-4459      |
| EIF4E3 | hsa-miR-7351-3p   |
| EIF4E3 | hsa-miR-577-3p    |
| EIF4E3 | hsa-miR-130a-3p   |
| EIF4E3 | hsa-miR-2904      |
| EIF4E3 | hsa-miR-4536-5p   |
| EIF4E3 | hsa-miR-2894      |
| EIF4E3 | hsa-miR-548b-3p   |
| EIF4E3 | hsa-miR-1555-5p   |
| EIF4E3 | hsa-miR-1684-5p   |
| EIF4E3 | hsa-miR-188-3p    |
| EIF4E3 | hsa-miR-294-3p    |
| EIF4E3 | hsa-miR-7304-3p   |
| EIF4E3 | hsa-miR-7340-5p   |
| EIF4E3 | hsa-miR-203b-3p   |
| EIF4E3 | hsa-miR-3552      |
| EIF4E3 | hsa-miR-219a-1-3p |
| EIF4E3 | hsa-miR-2442      |
| EIF4E3 | hsa-miR-6715a-3p  |
| EIF4E3 | hsa-miR-4436b-5p  |
| EIF4E3 | hsa-miR-7398o-5p  |
| EIF4E3 | hsa-miR-219-1-3p  |
| EIF4E3 | hsa-miR-6824-3p   |
| EIF4E3 | hsa-miR-2337      |
| EIF4E3 | hsa-miR-26-3p     |
| EIF4E3 | hsa-miR-6513-5p   |
| EIF4E3 | hsa-miR-8101      |
| EIF4E3 | hsa-miR-657       |
| EIF4E3 | hsa-miR-26b-3p    |
| EIF4E3 | hsa-miR-7449-3p   |

|        |                  |
|--------|------------------|
| EIF4E3 | hsa-miR-8108     |
| EIF4E3 | hsa-miR-1540     |
| EIF4E3 | hsa-miR-8063     |
| EIF4E3 | hsa-miR-1231-3p  |
| EIF4E3 | hsa-miR-2411-5p  |
| EIF4E3 | hsa-miR-7457-5p  |
| EIF4E3 | hsa-miR-2284d    |
| EIF4E3 | hsa-miR-1290     |
| EIF4E3 | hsa-miR-1540-3p  |
| EIF4E3 | hsa-miR-6758-3p  |
| EIF4E3 | hsa-miR-2284j    |
| EIF4E3 | hsa-miR-4419a    |
| EIF4E3 | hsa-miR-7224-3p  |
| EIF4E3 | hsa-miR-448      |
| EIF4E3 | hsa-miR-1966-3p  |
| EIF4E3 | hsa-miR-4802-3p  |
| EIF4E3 | hsa-miR-6418-5p  |
| EIF4E3 | hsa-miR-384      |
| EIF4E3 | hsa-miR-6807-5p  |
| EIF4E3 | hsa-miR-3572-5p  |
| EIF4E3 | hsa-miR-2375     |
| EIF4E3 | hsa-miR-485-3p   |
| EIF4E3 | hsa-miR-6986-3p  |
| EIF4E3 | hsa-miR-2437     |
| EIF4E3 | hsa-miR-7092-5p  |
| EIF4E3 | hsa-miR-6983-3p  |
| EIF4E3 | hsa-miR-937-5p   |
| EIF4E3 | hsa-miR-218-1-3p |
| EIF4E3 | hsa-miR-7262a-5p |
| EIF4E3 | hsa-miR-6961-3p  |
| EIF4E3 | hsa-miR-292a-5p  |
| EIF4E3 | hsa-miR-1288-5p  |
| EIF4E3 | hsa-miR-92a-2-5p |
| EIF4E3 | hsa-miR-10-5p    |
| EIF4E3 | hsa-miR-454-5p   |
| EIF4E3 | hsa-let-7f-1-3p  |
| EIF4E3 | hsa-miR-6416-5p  |
| EIF4E3 | hsa-miR-216a     |
| EIF4E3 | hsa-miR-33a-3p   |
| EIF4E3 | hsa-miR-4478     |
| EIF4E3 | hsa-miR-31-5p    |
| EIF4E3 | hsa-miR-6924-3p  |
| EIF4E3 | hsa-miR-5787     |
| EIF4E3 | hsa-miR-124-3p.2 |
| EIF4E3 | hsa-miR-3571     |
| EIF4E3 | hsa-miR-200bc    |

|        |                    |
|--------|--------------------|
| EIF4E3 | hsa-miR-1930-3p    |
| EIF4E3 | hsa-miR-7686-5p    |
| EIF4E3 | hsa-miR-5000-5p    |
| EIF4E3 | hsa-miR-7169-5p    |
| EIF4E3 | hsa-miR-2306       |
| EIF4E3 | hsa-miR-6931-5p    |
| EIF4E3 | hsa-miR-7090-3p    |
| EIF4E3 | hsa-miR-4536-5p    |
| EIF4E3 | hsa-miR-2891       |
| EIF4E3 | hsa-miR-7180-5p    |
| EIF4E3 | hsa-miR-6918-5p    |
| EIF4E3 | hsa-miR-6988-3p    |
| EIF4E3 | hsa-miR-615-5p     |
| EIF4E3 | hsa-miR-4504       |
| EIF4E3 | hsa-miR-320-3p     |
| EIF4E3 | hsa-miR-335-5p     |
| EIF4E3 | hsa-miR-149-3p     |
| EIF4E3 | hsa-miR-6815-3p    |
| EIF4E3 | hsa-miR-448-3p     |
| EIF4E3 | hsa-miR-7170-5p    |
| EIF4E3 | hsa-miR-520-5p     |
| EIF4E3 | hsa-miR-295-3p     |
| EIF4E3 | hsa-miR-1306-5p    |
| EIF4E3 | hsa-miR-1661       |
| EIF4E3 | hsa-miR-4324       |
| EIF4E3 | hsa-miR-7315-3p    |
| EIF4E3 | hsa-miR-7251-5p    |
| EIF4E3 | hsa-miR-5588-5p    |
| EIF4E3 | hsa-miR-7977       |
| EIF4E3 | hsa-miR-208a-3p    |
| EIF4E3 | hsa-miR-7238-3p    |
| EIF4E3 | hsa-miR-466b-3p    |
| EIF4E3 | hsa-miR-512-3p     |
| EIF4E3 | hsa-miR-7022-3p    |
| EIF4E3 | hsa-miR-142b       |
| EIF4E3 | hsa-miR-6344       |
| EIF4E3 | hsa-miR-2480       |
| EIF4E3 | hsa-miR-409-5p     |
| EIF4E3 | hsa-miR-2397-3p    |
| EIF4E3 | hsa-miR-483-3p.2   |
| EIF4E3 | hsa-miR-2284a      |
| EIF4E3 | hsa-miR-2325b      |
| EIF4E3 | hsa-miR-3667-5p    |
| EIF4E3 | hsa-miR-883b-5p    |
| EIF4E3 | hsa-miR-669aflp-5p |
| EIF4E3 | hsa-miR-3059-5p    |

|        |                  |
|--------|------------------|
| EIF4E3 | hsa-miR-2333     |
| EIF4E3 | hsa-miR-223-5p   |
| EIF4E3 | hsa-miR-28-5p    |
| EIF4E3 | hsa-miR-8848     |
| EIF4E3 | hsa-miR-421      |
| EIF4E3 | hsa-miR-6905-5p  |
| EIF4E3 | hsa-miR-7294-5p  |
| EIF4E3 | hsa-miR-3529-3p  |
| EIF4E3 | hsa-miR-514a-3p  |
| EIF4E3 | hsa-miR-6920-3p  |
| EIF4E3 | hsa-miR-7669-3p  |
| EIF4E3 | hsa-miR-6784-3p  |
| EIF4E3 | hsa-miR-3064-5p  |
| EIF4E3 | hsa-miR-23b-5p   |
| EIF4E3 | hsa-miR-641      |
| EIF4E3 | hsa-miR-465-5p   |
| EIF4E3 | hsa-miR-7205-3p  |
| EIF4E3 | hsa-miR-743b-5p  |
| EIF4E3 | hsa-miR-27-5p    |
| EIF4E3 | hsa-miR-3103-3p  |
| EIF4E3 | hsa-miR-668-3p   |
| EIF4E3 | hsa-miR-7648-3p  |
| EIF4E3 | hsa-miR-742-5p   |
| EIF4E3 | hsa-miR-561-3p   |
| EIF4E3 | hsa-miR-193-5p   |
| EIF4E3 | hsa-miR-200a-3p  |
| EIF4E3 | hsa-miR-3622b-5p |
| EIF4E3 | hsa-miR-556-5p   |
| EIF4E3 | hsa-miR-7162-3p  |
| EIF4E3 | hsa-miR-579      |
| EIF4E3 | hsa-miR-3073a-5p |
| EIF4E3 | hsa-miR-887-3p   |
| EIF4E3 | hsa-miR-7038-3p  |
| EIF4E3 | hsa-miR-429-5p   |
| EIF4E3 | hsa-miR-764      |
| EIF4E3 | hsa-miR-6508-5p  |
| EIF4E3 | hsa-miR-5588-3p  |
| EIF4E3 | hsa-miR-6742-3p  |
| EIF4E3 | hsa-miR-206-3p   |
| EIF4E3 | hsa-miR-7341-3p  |
| EIF4E3 | hsa-miR-6769b-3p |
| EIF4E3 | hsa-miR-551-5p   |
| EIF4E3 | hsa-miR-6790-3p  |
| EIF4E3 | hsa-miR-379-5p   |
| EIF4E3 | hsa-miR-206-5p   |
| EIF4E3 | hsa-miR-93-5p    |

|        |                   |
|--------|-------------------|
| EIF4E3 | hsa-miR-302a-3p   |
| EIF4E3 | hsa-miR-8795      |
| EIF4E3 | hsa-miR-3067-3p   |
| EIF4E3 | hsa-miR-548as-5p  |
| EIF4E3 | hsa-miR-7056-3p   |
| EIF4E3 | hsa-miR-3120-5p   |
| EIF4E3 | hsa-miR-409-3p    |
| EIF4E3 | hsa-miR-6123      |
| EIF4E3 | hsa-miR-2379      |
| EIF4E3 | hsa-miR-4320      |
| EIF4E3 | hsa-miR-574-5p    |
| EIF4E3 | hsa-miR-6832-3p   |
| EIF4E3 | hsa-miR-7386d-3p  |
| EIF4E3 | hsa-miR-590-3p    |
| EIF4E3 | hsa-miR-6956-5p   |
| EIF4E3 | hsa-miR-34-5p     |
| EIF4E3 | hsa-miR-8839      |
| EIF4E3 | hsa-miR-580-3p    |
| EIF4E3 | hsa-miR-1343      |
| EIF4E3 | hsa-miR-938       |
| EIF4E3 | hsa-miR-1465      |
| EIF4E3 | hsa-miR-3173-5p   |
| EIF4E3 | hsa-miR-6932-5p   |
| EIF4E3 | hsa-miR-7359-5p   |
| EIF4E3 | hsa-miR-376a-1-5p |
| EIF4E3 | hsa-miR-4759      |
| EIF4E3 | hsa-miR-18-3p     |
| EIF4E3 | hsa-miR-3606-3p   |
| EIF4E3 | hsa-miR-6797-3p   |
| EIF4E3 | hsa-miR-1267      |
| EIF4E3 | hsa-miR-28-5p     |
| EIF4E3 | hsa-miR-8077      |
| EIF4E3 | hsa-miR-639       |
| EIF4E3 | hsa-miR-6727-3p   |
| EIF4E3 | hsa-miR-17-3p     |
| EIF4E3 | hsa-miR-212-5p    |
| EIF4E3 | hsa-miR-2477      |
| EIF4E3 | hsa-miR-676-3p    |
| EIF4E3 | hsa-miR-4523      |
| EIF4E3 | hsa-miR-1243      |
| EIF4E3 | hsa-miR-4790-3p   |
| EIF4E3 | hsa-miR-2284w     |
| EIF4E3 | hsa-miR-455-3p.1  |
| EIF4E3 | hsa-miR-203a-5p   |
| EIF4E3 | hsa-miR-6780b-3p  |
| EIF4E3 | hsa-miR-8106      |

|        |                  |
|--------|------------------|
| EIF4E3 | hsa-miR-7069-3p  |
| EIF4E3 | hsa-miR-338-3p   |
| EIF4E3 | hsa-miR-891      |
| EIF4E3 | hsa-miR-18b-3p   |
| EIF4E3 | hsa-miR-29a-1-5p |
| EIF4E3 | hsa-miR-3650     |
| EIF4E3 | hsa-miR-7683-3p  |
| EIF4E3 | hsa-miR-6903-5p  |
| EIF4E3 | hsa-miR-2345     |
| EIF4E3 | hsa-miR-6378     |
| EIF4E3 | hsa-miR-7396-5p  |
| EIF4E3 | hsa-miR-194-3p   |
| EIF4E3 | hsa-miR-424-5p   |
| EIF4E3 | hsa-miR-7193-3p  |
| EIF4E3 | hsa-miR-2389     |
| EIF4E3 | hsa-miR-7004-5p  |
| EIF4E3 | hsa-miR-3916     |
| EIF4E3 | hsa-miR-7199-5p  |
| EIF4E3 | hsa-miR-744-3p   |
| EIF4E3 | hsa-miR-1952     |
| EIF4E3 | hsa-miR-8822     |
| EIF4E3 | hsa-miR-130a-5p  |
| EIF4E3 | hsa-miR-7847-3p  |
| EIF4E3 | hsa-miR-106a-3p  |
| EIF4E3 | hsa-miR-3914     |
| EIF4E3 | hsa-miR-432-5p   |
| EIF4E3 | hsa-miR-4494     |
| EIF4E3 | hsa-miR-874      |
| EIF4E3 | hsa-miR-2462     |
| EIF4E3 | hsa-miR-4703-5p  |
| EIF4E3 | hsa-miR-507b     |
| EIF4E3 | hsa-miR-4764-5p  |
| EIF4E3 | hsa-miR-7045-5p  |
| EIF4E3 | hsa-miR-7029-3p  |
| EIF4E3 | hsa-miR-3128     |
| EIF4E3 | hsa-miR-7089-5p  |
| EIF4E3 | hsa-miR-7041-5p  |
| EIF4E3 | hsa-miR-23c      |
| EIF4E3 | hsa-miR-216a-5p  |
| EIF4E3 | hsa-miR-7036b-3p |
| EIF4E3 | hsa-miR-7230-3p  |
| EIF4E3 | hsa-miR-889-3p   |
| EIF4E3 | hsa-miR-3152-3p  |
| EIF4E3 | hsa-miR-1236-5p  |
| EIF4E3 | hsa-miR-6760-5p  |
| EIF4E3 | hsa-miR-34bc-3p  |



|        |                   |
|--------|-------------------|
| EIF4E3 | hsa-miR-320b      |
| EIF4E3 | hsa-miR-1434-3p   |
| EIF4E3 | hsa-miR-742-3p    |
| EIF4E3 | hsa-miR-1584-3p   |
| EIF4E3 | hsa-miR-550a-3-5p |
| EIF4E3 | hsa-miR-8879      |
| EIF4E3 | hsa-miR-8854      |
| EIF4E3 | hsa-miR-548o-5p   |
| EIF4E3 | hsa-miR-7091-3p   |
| EIF4E3 | hsa-miR-5626-3p   |
| EIF4E3 | hsa-miR-8861      |
| EIF4E3 | hsa-miR-2423      |
| EIF4E3 | hsa-miR-23-3p     |
| EIF4E3 | hsa-miR-2308      |
| EIF4E3 | hsa-miR-3101-3p   |
| EIF4E3 | hsa-miR-337-3p    |
| EIF4E3 | hsa-miR-3622b-3p  |
| EIF4E3 | hsa-miR-3129-5p   |
| EIF4E3 | hsa-miR-7257-3p   |
| EIF4E3 | hsa-miR-678       |
| EIF4E3 | hsa-miR-4727-3p   |
| EIF4E3 | hsa-miR-107-5p    |
| EIF4E3 | hsa-miR-1251-3p   |
| EIF4E3 | hsa-miR-2464-5p   |
| EIF4E3 | hsa-miR-5702      |
| EIF4E3 | hsa-miR-1238-5p   |
| EIF4E3 | hsa-miR-466b-5p   |
| EIF4E3 | hsa-miR-6867-5p   |
| EIF4E3 | hsa-miR-193a      |
| EIF4E3 | hsa-miR-92a-1-5p  |
| EIF4E3 | hsa-miR-2895      |
| EIF4E3 | hsa-miR-134       |
| EIF4E3 | hsa-miR-711       |
| EIF4E3 | hsa-miR-2322-5p   |
| EIF4E3 | hsa-miR-3475-5p   |
| EIF4E3 | hsa-miR-1263      |
| EIF4E3 | hsa-miR-3075-3p   |
| EIF4E3 | hsa-miR-376-3p    |
| EIF4E3 | hsa-miR-142       |
| EIF4E3 | hsa-miR-34c-5p    |
| EIF4E3 | hsa-miR-2319      |
| EIF4E3 | hsa-miR-7074-5p   |
| EIF4E3 | hsa-miR-6537-3p   |
| EIF4E3 | hsa-miR-1298-5p   |
| EIF4E3 | hsa-miR-7388b-5p  |
| EIF4E3 | hsa-miR-4327      |

|        |                  |
|--------|------------------|
| EIF4E3 | hsa-miR-1948-3p  |
| EIF4E3 | hsa-miR-6761-5p  |
| EIF4E3 | hsa-miR-383-5p.1 |
| EIF4E3 | hsa-miR-8833     |
| EIF4E3 | hsa-miR-5579-3p  |
| EIF4E3 | hsa-miR-7042-3p  |
| EIF4E3 | hsa-miR-524-5p   |
| EIF4E3 | hsa-miR-2285s    |
| EIF4E3 | hsa-miR-7325-3p  |
| EIF4E3 | hsa-miR-320-5p   |
| EIF4E3 | hsa-miR-138-1-3p |
| EIF4E3 | hsa-miR-1941-5p  |
| EIF4E3 | hsa-miR-194-5p   |
| EIF4E3 | hsa-miR-6971-5p  |
| EIF4E3 | hsa-miR-373-3p   |
| EIF4E3 | hsa-miR-4760-5p  |
| EIF4E3 | hsa-miR-542-3p   |
| EIF4E3 | hsa-miR-3175     |
| EIF4E3 | hsa-miR-339-3p   |
| EIF4E3 | hsa-miR-7082-3p  |
| EIF4E3 | hsa-miR-518c-5p  |
| EIF4E3 | hsa-miR-4645-5p  |
| EIF4E3 | hsa-miR-548am-5p |
| EIF4E3 | hsa-miR-2276-5p  |
| EIF4E3 | hsa-miR-548ag    |
| EIF4E3 | hsa-miR-5623-3p  |
| EIF4E3 | hsa-miR-155-5p   |
| EIF4E3 | hsa-miR-1184     |
| EIF4E3 | hsa-miR-142-3p.2 |
| EIF4E3 | hsa-miR-6923-3p  |
| EIF4E3 | hsa-miR-540-5p   |
| EIF4E3 | hsa-miR-7312-5p  |
| EIF4E3 | hsa-miR-363-3p   |
| EIF4E3 | hsa-miR-4282     |
| EIF4E3 | hsa-miR-187-3p   |
| EIF4E3 | hsa-miR-548n     |
| EIF4E3 | hsa-miR-7678-3p  |
| EIF4E3 | hsa-miR-411-5p   |
| EIF4E3 | hsa-miR-2053     |
| EIF4E3 | hsa-miR-6550-5p  |
| EIF4E3 | hsa-miR-3184-3p  |
| EIF4E3 | hsa-miR-7113-3p  |
| EIF4E3 | hsa-miR-3475-3p  |
| EIF4E3 | hsa-miR-6627-3p  |
| EIF4E3 | hsa-miR-6676-3p  |
| EIF4E3 | hsa-miR-6765-3p  |

|        |                  |
|--------|------------------|
| EIF4E3 | hsa-miR-672-3p   |
| EIF4E3 | hsa-miR-3945     |
| EIF4E3 | hsa-miR-625-3p   |
| EIF4E3 | hsa-miR-3182     |
| EIF4E3 | hsa-miR-665      |
| EIF4E3 | hsa-miR-3076-3p  |
| EIF4E3 | hsa-miR-656-3p   |
| EIF4E3 | hsa-miR-7296-3p  |
| EIF4E3 | hsa-miR-636      |
| EIF4E3 | hsa-miR-4468     |
| EIF4E3 | hsa-miR-4281     |
| EIF4E3 | hsa-miR-8093     |
| EIF4E3 | hsa-miR-935      |
| EIF4E3 | hsa-miR-3123     |
| EIF4E3 | hsa-miR-2357     |
| EIF4E3 | hsa-miR-8813     |
| EIF4E3 | hsa-miR-1894-3p  |
| EIF4E3 | hsa-miR-223-3p   |
| EIF4E3 | hsa-miR-4427     |
| EIF4E3 | hsa-miR-6958-5p  |
| EIF4E3 | hsa-miR-466n-5p  |
| EIF4E3 | hsa-miR-605-5p   |
| EIF4E3 | hsa-miR-6975-5p  |
| EIF4E3 | hsa-miR-26       |
| EIF4E3 | hsa-miR-466l-3p  |
| EIF4E3 | hsa-miR-7394b-5p |
| EIF4E3 | hsa-miR-6883-5p  |
| EIF4E3 | hsa-miR-497-3p   |
| EIF4E3 | hsa-miR-7185-5p  |
| EIF4E3 | hsa-miR-3929     |
| EIF4E3 | hsa-miR-4667-3p  |
| EIF4E3 | hsa-miR-6806-5p  |
| EIF4E3 | hsa-miR-8068     |
| EIF4E3 | hsa-miR-5698     |
| EIF4E3 | hsa-miR-4769-5p  |
| EIF4E3 | hsa-miR-3085-3p  |
| EIF4E3 | hsa-miR-450-5p   |
| EIF4E3 | hsa-miR-3119     |
| EIF4E3 | hsa-miR-2331-5p  |
| EIF4E3 | hsa-miR-6982-3p  |
| EIF4E3 | hsa-miR-7398e-3p |
| EIF4E3 | hsa-miR-370-3p   |
| EIF4E3 | hsa-miR-7173-3p  |
| EIF4E3 | hsa-miR-548e-3p  |
| EIF4E3 | hsa-miR-34b-3p   |
| EIF4E3 | hsa-miR-1343-5p  |

|        |                   |
|--------|-------------------|
| EIF4E3 | hsa-miR-6818-5p   |
| EIF4E3 | hsa-miR-514a-3p   |
| EIF4E3 | hsa-miR-10b-3p    |
| EIF4E3 | hsa-miR-132-3p    |
| EIF4E3 | hsa-miR-8061      |
| EIF4E3 | hsa-miR-942-3p    |
| EIF4E3 | hsa-miR-4496      |
| EIF4E3 | hsa-miR-642-3p    |
| EIF4E3 | hsa-miR-3134      |
| EIF4E3 | hsa-miR-6908-3p   |
| EIF4E3 | hsa-miR-7054-3p   |
| EIF4E3 | hsa-miR-2355-3p   |
| EIF4E3 | hsa-miR-7008-3p   |
| EIF4E3 | hsa-miR-3682-3p   |
| EIF4E3 | hsa-miR-7186-3p   |
| EIF4E3 | hsa-miR-3132      |
| EIF4E3 | hsa-miR-6693-3p   |
| EIF4E3 | hsa-miR-323a-3p   |
| EIF4E3 | hsa-miR-3964      |
| EIF4E3 | hsa-miR-1298      |
| EIF4E3 | hsa-miR-3130-5p   |
| EIF4E3 | hsa-miR-5699-5p   |
| EIF4E3 | hsa-miR-7080-5p   |
| EIF4E3 | hsa-miR-1547-5p   |
| EIF4E3 | hsa-miR-106       |
| EIF4E3 | hsa-miR-3689f     |
| EIF4E3 | hsa-miR-668       |
| EIF4E3 | hsa-miR-5680      |
| EIF4E3 | hsa-miR-6756-5p   |
| EIF4E3 | hsa-miR-3065-3p   |
| EIF4E3 | hsa-miR-1287      |
| EIF4E3 | hsa-miR-7225-3p   |
| EIF4E3 | hsa-miR-509-3-5p  |
| EIF4E3 | hsa-miR-7685-3p   |
| EIF4E3 | hsa-miR-4712-3p   |
| EIF4E3 | hsa-miR-7026-3p   |
| EIF4E3 | hsa-miR-7319-5p   |
| EIF4E3 | hsa-miR-17-5p     |
| EIF4E3 | hsa-miR-7331-1-3p |
| EIF4E3 | hsa-miR-3156-5p   |
| EIF4E3 | hsa-miR-6835-5p   |
| EIF4E3 | hsa-miR-6780a-5p  |
| EIF4E3 | hsa-miR-6906-5p   |
| EIF4E3 | hsa-miR-664a-5p   |
| EIF4E3 | hsa-miR-423-3p    |
| EIF4E3 | hsa-miR-215-3p    |

|        |                  |
|--------|------------------|
| EIF4E3 | hsa-miR-8877     |
| EIF4E3 | hsa-miR-7395-3p  |
| EIF4E3 | hsa-miR-126-5p   |
| EIF4E3 | hsa-miR-7016-3p  |
| EIF4E3 | hsa-miR-3617-5p  |
| EIF4E3 | hsa-miR-7649-3p  |
| EIF4E3 | hsa-miR-3547-5p  |
| EIF4E3 | hsa-miR-516      |
| EIF4E3 | hsa-miR-183-5p.1 |
| EIF4E3 | hsa-miR-6989-3p  |
| EIF4E3 | hsa-miR-7657-5p  |
| EIF4E3 | hsa-miR-7297-3p  |
| EIF4E3 | hsa-miR-7215-5p  |
| EIF4E3 | hsa-miR-10b-5p   |
| EIF4E3 | hsa-miR-2296     |
| EIF4E3 | hsa-miR-22-3p    |
| EIF4E3 | hsa-miR-3662     |
| EIF4E3 | hsa-miR-891-3p   |
| EIF4E3 | hsa-miR-548k     |
| EIF4E3 | hsa-miR-2367-3p  |
| EIF4E3 | hsa-miR-452-5p   |
| EIF4E3 | hsa-miR-1273e    |
| EIF4E3 | hsa-miR-584-5p   |
| EIF4E3 | hsa-miR-576-5p   |
| EIF4E3 | hsa-miR-7662-5p  |
| EIF4E3 | hsa-miR-363-5p   |
| EIF4E3 | hsa-miR-3653-5p  |
| EIF4E3 | hsa-miR-6920-5p  |
| EIF4E3 | hsa-miR-1233-3p  |
| EIF4E3 | hsa-miR-6333     |
| EIF4E3 | hsa-miR-7227-3p  |
| EIF4E3 | hsa-miR-4762-5p  |
| EIF4E3 | hsa-miR-4531     |
| EIF4E3 | hsa-miR-8880     |
| EIF4E3 | hsa-miR-7371f-5p |
| EIF4E3 | hsa-miR-548ay-3p |
| EIF4E3 | hsa-miR-7675-3p  |
| EIF4E3 | hsa-miR-185-5p   |
| EIF4E3 | hsa-miR-6793-3p  |
| EIF4E3 | hsa-miR-201-3p   |
| EIF4E3 | hsa-miR-2486-5p  |
| EIF4E3 | hsa-miR-7079-3p  |
| EIF4E3 | hsa-miR-18a-3p   |
| EIF4E3 | hsa-miR-146a-3p  |
| EIF4E3 | hsa-miR-1545b-5p |
| EIF4E3 | hsa-miR-4519     |

|        |                   |
|--------|-------------------|
| EIF4E3 | hsa-miR-450a-1-3p |
| EIF4E3 | hsa-miR-7226-3p   |
| EIF4E3 | hsa-miR-6760-3p   |
| EIF4E3 | hsa-miR-6782-3p   |
| EIF4E3 | hsa-miR-574-3p    |
| EIF4E3 | hsa-miR-6877-3p   |
| EIF4E3 | hsa-miR-548aj-5p  |
| EIF4E3 | hsa-miR-2285u     |
| EIF4E3 | hsa-miR-8062      |
| EIF4E3 | hsa-miR-877-5p    |
| EIF4E3 | hsa-miR-6780b-5p  |
| EIF4E3 | hsa-miR-340-5p    |
| EIF4E3 | hsa-miR-4535      |
| EIF4E3 | hsa-miR-6972-3p   |
| EIF4E3 | hsa-miR-7398-3p   |
| EIF4E3 | hsa-miR-7256-3p   |
| EIF4E3 | hsa-miR-487a-5p   |
| EIF4E3 | hsa-miR-3145-3p   |
| EIF4E3 | hsa-miR-7079-5p   |
| EIF4E3 | hsa-miR-3113-5p   |
| EIF4E3 | hsa-miR-376bc-5p  |
| EIF4E3 | hsa-miR-4719      |
| EIF4E3 | hsa-miR-7197-3p   |
| EIF4E3 | hsa-miR-2356      |
| EIF4E3 | hsa-miR-3549      |
| EIF4E3 | hsa-miR-6133      |
| EIF4E3 | hsa-miR-6529a     |
| EIF4E3 | hsa-miR-1799      |
| EIF4E3 | hsa-miR-7285-5p   |
| EIF4E3 | hsa-miR-494-5p    |
| EIF4E3 | hsa-miR-7a-2-3p   |
| EIF4E3 | hsa-miR-2349      |
| EIF4E3 | hsa-miR-6540-3p   |
| EIF4E3 | hsa-miR-4723-5p   |
| EIF4E3 | hsa-miR-7688-5p   |
| EIF4E3 | hsa-miR-3942-5p   |
| EIF4E3 | hsa-miR-1270      |
| EIF4E3 | hsa-miR-3106-3p   |
| EIF4E3 | hsa-miR-1912      |
| EIF4E3 | hsa-miR-302c-5p   |
| EIF4E3 | hsa-miR-7076-5p   |
| EIF4E3 | hsa-miR-710       |
| EIF4E3 | hsa-miR-4673      |
| EIF4E3 | hsa-miR-1183      |
| EIF4E3 | hsa-miR-2402      |
| EIF4E3 | hsa-miR-3470a     |

|        |                   |
|--------|-------------------|
| EIF4E3 | hsa-miR-2458      |
| EIF4E3 | hsa-miR-6857-5p   |
| EIF4E3 | hsa-miR-4780      |
| EIF4E3 | hsa-miR-138-5p    |
| EIF4E3 | hsa-miR-7320-5p   |
| EIF4E3 | hsa-miR-7001-3p   |
| EIF4E3 | hsa-miR-597-5p    |
| EIF4E3 | hsa-miR-6373      |
| EIF4E3 | hsa-miR-4667      |
| EIF4E3 | hsa-miR-7192-5p   |
| EIF4E3 | hsa-miR-548p      |
| EIF4E3 | hsa-miR-3162-5p   |
| EIF4E3 | hsa-miR-3692-3p   |
| EIF4E3 | hsa-miR-486-3p    |
| EIF4E3 | hsa-miR-7398j-3p  |
| EIF4E3 | hsa-miR-6366      |
| EIF4E3 | hsa-miR-190-3p    |
| EIF4E3 | hsa-miR-105-5p    |
| EIF4E3 | hsa-miR-128-3p    |
| EIF4E3 | hsa-miR-4510      |
| EIF4E3 | hsa-miR-8857      |
| EIF4E3 | hsa-miR-645       |
| EIF4E3 | hsa-miR-3129-3p   |
| EIF4E3 | hsa-miR-7704      |
| EIF4E3 | hsa-miR-466ade-3p |
| EIF4E3 | hsa-miR-6957-3p   |
| EIF4E3 | hsa-miR-6735-3p   |
| EIF4E3 | hsa-miR-3692-5p   |
| EIF4E3 | hsa-miR-203       |
| EIF4E3 | hsa-miR-6944-3p   |
| EIF4E3 | hsa-miR-7314-3p   |
| EIF4E3 | hsa-miR-298       |
| EIF4G3 | hsa-miR-3524-3p   |
| EIF4G3 | hsa-miR-6878-3p   |
| EIF4G3 | hsa-miR-2394      |
| EIF4G3 | hsa-miR-7157-5p   |
| EIF4G3 | hsa-miR-6932-3p   |
| EIF4G3 | hsa-miR-129-5p    |
| EIF4G3 | hsa-miR-4728-5p   |
| EIF4G3 | hsa-miR-2284      |
| EIF4G3 | hsa-miR-4676-5p   |
| EIF4G3 | hsa-miR-7245-5p   |
| EIF4G3 | hsa-miR-6558-5p   |
| EIF4G3 | hsa-miR-369-3p    |
| EIF4G3 | hsa-miR-186-3p    |
| EIF4G3 | hsa-miR-646       |

|        |                  |
|--------|------------------|
| EIF4G3 | hsa-miR-2325     |
| EIF4G3 | hsa-miR-6817-3p  |
| EIF4G3 | hsa-miR-193b-5p  |
| EIF4G3 | hsa-miR-4799-3p  |
| EIF4G3 | hsa-miR-6995-5p  |
| EIF4G3 | hsa-miR-567      |
| EIF4G3 | hsa-miR-4638-3p  |
| EIF4G3 | hsa-miR-1266     |
| EIF4G3 | hsa-miR-148a-5p  |
| EIF4G3 | hsa-miR-5101     |
| EIF4G3 | hsa-miR-6809-3p  |
| EIF4G3 | hsa-miR-1306-3p  |
| EIF4G3 | hsa-miR-1680-5p  |
| EIF4G3 | hsa-miR-1689-5p  |
| EIF4G3 | hsa-miR-7183-5p  |
| EIF4G3 | hsa-miR-7317-3p  |
| EIF4G3 | hsa-miR-3571     |
| EIF4G3 | hsa-miR-101c     |
| EIF4G3 | hsa-miR-6976-5p  |
| EIF4G3 | hsa-miR-7386l-3p |
| EIF4G3 | hsa-miR-7191-3p  |
| EIF4G3 | hsa-miR-6516-3p  |
| EIF4G3 | hsa-miR-8847     |
| EIF4G3 | hsa-miR-6573-5p  |
| EIF4G3 | hsa-miR-1237-3p  |
| EIF4G3 | hsa-miR-4692     |
| EIF4G3 | hsa-miR-760-5p   |
| EIF4G3 | hsa-miR-6551-5p  |
| EIF4G3 | hsa-miR-3606-3p  |
| EIF4G3 | hsa-miR-1185-5p  |
| EIF4G3 | hsa-miR-5703     |
| EIF4G3 | hsa-miR-1773-3p  |
| EIF4G3 | hsa-miR-7053-3p  |
| EIF4G3 | hsa-miR-6863     |
| EIF4G3 | hsa-miR-6399     |
| EIF4G3 | hsa-miR-6882-5p  |
| EIF4G3 | hsa-miR-107      |
| EIF4G3 | hsa-miR-3613-3p  |
| EIF4G3 | hsa-miR-495-3p   |
| EIF4G3 | hsa-miR-1463     |
| EIF4G3 | hsa-miR-4724-3p  |
| EIF4G3 | hsa-miR-7398m-3p |
| EIF4G3 | hsa-miR-4677-5p  |
| EIF4G3 | hsa-miR-7673-3p  |
| EIF4G3 | hsa-miR-4536-3p  |
| EIF4G3 | hsa-miR-3124-3p  |



|        |                   |
|--------|-------------------|
| EIF4G3 | hsa-miR-141-3p    |
| EIF4G3 | hsa-miR-1598      |
| EIF4G3 | hsa-miR-548at-5p  |
| EIF4G3 | hsa-miR-103-3p    |
| EIF4G3 | hsa-miR-8485      |
| EIF4G3 | hsa-miR-6840-3p   |
| EIF4G3 | hsa-miR-4635      |
| EIF4G3 | hsa-miR-548ah-5p  |
| EIF4G3 | hsa-miR-33-3p     |
| EIF4G3 | hsa-miR-7207-5p   |
| EIF4G3 | hsa-miR-7108-3p   |
| EIF4G3 | hsa-miR-669c-3p   |
| EIF4G3 | hsa-miR-7330-3p   |
| EIF4G3 | hsa-miR-544-3p    |
| EIF4G3 | hsa-miR-2363      |
| EIF4G3 | hsa-miR-3179      |
| EIF4G3 | hsa-miR-4434      |
| EIF4G3 | hsa-miR-7314-5p   |
| EIF4G3 | hsa-miR-883-5p    |
| EIF4G3 | hsa-miR-6619-5p   |
| EIF4G3 | hsa-miR-5696      |
| EIF4G3 | hsa-miR-2346      |
| EIF4G3 | hsa-miR-6830-3p   |
| EIF4G3 | hsa-miR-8850      |
| EIF4G3 | hsa-miR-4748      |
| EIF4G3 | hsa-miR-7094-1-5p |
| EIF4G3 | hsa-miR-2284g     |
| EIF4G3 | hsa-miR-590-5p    |
| EIF4G3 | hsa-miR-5003-3p   |
| EIF4G3 | hsa-miR-7352-3p   |
| EIF4G3 | hsa-miR-5709-3p   |
| EIF4G3 | hsa-miR-883ab-3p  |
| EIF4G3 | hsa-miR-4793-3p   |
| EIF4G3 | hsa-miR-7243-5p   |
| EIF4G3 | hsa-miR-3618-5p   |
| EIF4G3 | hsa-miR-3573-5p   |
| EIF4G3 | hsa-miR-2284k     |
| EIF4G3 | hsa-miR-6376      |
| EIF4G3 | hsa-miR-381-3p    |
| EIF4G3 | hsa-miR-2284b     |
| EIF4G3 | hsa-miR-466g      |
| EIF4G3 | hsa-miR-302c-3p.2 |
| EIF4G3 | hsa-miR-376e      |
| EIF4G3 | hsa-miR-7663-5p   |
| EIF4G3 | hsa-miR-29b-2-5p  |
| EIF4G3 | hsa-miR-6755-5p   |

|        |                  |
|--------|------------------|
| EIF4G3 | hsa-miR-7398q-3p |
| EIF4G3 | hsa-miR-5691     |
| EIF4G3 | hsa-miR-5615-5p  |
| EIF4G3 | hsa-miR-3058-3p  |
| EIF4G3 | hsa-miR-145-3p   |
| EIF4G3 | hsa-miR-6701-3p  |
| EIF4G3 | hsa-miR-133b-5p  |
| EIF4G3 | hsa-miR-2284l    |
| EIF4G3 | hsa-miR-7250-3p  |
| EIF4G3 | hsa-miR-6625-5p  |
| EIF4G3 | hsa-miR-9-3p     |
| EIF4G3 | hsa-miR-4473     |
| EIF4G3 | hsa-miR-7681-5p  |
| EIF4G3 | hsa-miR-7192-3p  |
| EIF4G3 | hsa-miR-520      |
| EIF4G3 | hsa-miR-133c     |
| EIF4G3 | hsa-miR-297-5p   |
| EIF4G3 | hsa-miR-7264-3p  |
| EIF4G3 | hsa-miR-883-3p   |
| EIF4G3 | hsa-miR-6357     |
| EIF4G3 | hsa-miR-4768-3p  |
| EIF4G3 | hsa-miR-7461-5p  |
| EIF4G3 | hsa-miR-3121-3p  |
| EIF4G3 | hsa-miR-5692a    |
| EIF4G3 | hsa-miR-7438-5p  |
| EIF4G3 | hsa-miR-1237-3p  |
| EIF4G3 | hsa-miR-517a-3p  |
| EIF4G3 | hsa-miR-936      |
| EIF4G3 | hsa-miR-3595     |
| EIF4G3 | hsa-miR-1814a    |
| EIF4G3 | hsa-miR-7854-3p  |
| EIF4G3 | hsa-miR-2329-3p  |
| EIF4G3 | hsa-miR-3577     |
| EIF4G3 | hsa-miR-3191-5p  |
| EIF4G3 | hsa-miR-7650-5p  |
| EIF4G3 | hsa-miR-8886     |
| EIF4G3 | hsa-miR-6823-5p  |
| EIF4G3 | hsa-miR-2446     |
| EIF4G3 | hsa-miR-7022-3p  |
| EIF4G3 | hsa-miR-6973a-3p |
| EIF4G3 | hsa-miR-8796     |
| EIF4G3 | hsa-miR-4789-5p  |
| EIF4G3 | hsa-miR-98-3p    |
| EIF4G3 | hsa-miR-6684-5p  |
| EIF4G3 | hsa-miR-22-5p    |
| EIF4G3 | hsa-miR-1934-5p  |

|        |                  |
|--------|------------------|
| EIF4G3 | hsa-miR-548c-3p  |
| EIF4G3 | hsa-miR-134-3p   |
| EIF4G3 | hsa-miR-6868-3p  |
| EIF4G3 | hsa-miR-7254-3p  |
| EIF4G3 | hsa-miR-6874-3p  |
| EIF4G3 | hsa-miR-7341-5p  |
| EIF4G3 | hsa-miR-3596d    |
| EIF4G3 | hsa-miR-103      |
| EIF4G3 | hsa-miR-7270-3p  |
| EIF4G3 | hsa-miR-1771     |
| EIF4G3 | hsa-miR-378f     |
| EIF4G3 | hsa-miR-329-3p   |
| EIF4G3 | hsa-miR-6632-5p  |
| EIF4G3 | hsa-miR-148b-5p  |
| EIF4G3 | hsa-miR-8070     |
| EIF4G3 | hsa-miR-2337     |
| EIF4G3 | hsa-miR-7110-3p  |
| EIF4G3 | hsa-miR-7183-3p  |
| EIF4G3 | hsa-miR-3586-3p  |
| EIF4G3 | hsa-miR-6620-5p  |
| EIF4G3 | hsa-miR-6714-3p  |
| EIF4G3 | hsa-miR-2334     |
| EIF4G3 | hsa-miR-466f-3p  |
| EIF4G3 | hsa-miR-7447-3p  |
| EIF4G3 | hsa-miR-2285af   |
| EIF4G3 | hsa-miR-7052-3p  |
| EIF4G3 | hsa-miR-7174-5p  |
| EIF4G3 | hsa-miR-1262-5p  |
| EIF4G3 | hsa-miR-713      |
| EIF4G3 | hsa-miR-7065-3p  |
| EIF4G3 | hsa-miR-7251-3p  |
| EIF4G3 | hsa-miR-7398l-3p |
| EIF4G3 | hsa-miR-3941     |
| EIF4G3 | hsa-miR-290b-5p  |
| EIF4G3 | hsa-miR-525-5p   |
| EIF4G3 | hsa-miR-33a-3p   |
| EIF4G3 | hsa-miR-496.1    |
| EIF4G3 | hsa-miR-7680-3p  |
| EIF4G3 | hsa-miR-7059-3p  |
| EIF4G3 | hsa-miR-4309     |
| EIF4G3 | hsa-miR-6554-5p  |
| EIF4G3 | hsa-miR-5589-3p  |
| EIF4G3 | hsa-miR-2284ab   |
| EIF4G3 | hsa-miR-3082-3p  |
| EIF4G3 | hsa-miR-409      |
| EIF4G3 | hsa-miR-7515     |

|        |                  |
|--------|------------------|
| EIF4G3 | hsa-miR-6981-3p  |
| EIF4G3 | hsa-miR-329      |
| EIF4G3 | hsa-miR-452-5p   |
| EIF4G3 | hsa-miR-378-5p   |
| EIF4G3 | hsa-miR-1416-5p  |
| EIF4G3 | hsa-miR-450b-5p  |
| EIF4G3 | hsa-miR-2284u    |
| EIF4G3 | hsa-miR-7350-3p  |
| EIF4G3 | hsa-miR-7215-3p  |
| EIF4G3 | hsa-miR-7386g-3p |
| EIF4G3 | hsa-miR-6083     |
| EIF4G3 | hsa-miR-150-5p   |
| EIF4G3 | hsa-miR-183-3p   |
| EIF4G3 | hsa-miR-6825-5p  |
| EIF4G3 | hsa-miR-6068     |
| EIF4G3 | hsa-miR-762      |
| EIF4G3 | hsa-miR-712-5p   |
| EIF4G3 | hsa-miR-372-5p   |
| EIF4G3 | hsa-miR-7389-3p  |
| EIF4G3 | hsa-miR-7039-3p  |
| EIF4G3 | hsa-miR-7323-5p  |
| EIF4G3 | hsa-miR-2127     |
| EIF4G3 | hsa-miR-2365     |
| EIF4G3 | hsa-miR-1641     |
| EIF4G3 | hsa-miR-1748     |
| EIF4G3 | hsa-miR-6503-3p  |
| EIF4G3 | hsa-let-7a-3p    |
| EIF4G3 | hsa-miR-7398s-3p |
| EIF4G3 | hsa-miR-7106-3p  |
| EIF4G3 | hsa-miR-1552-5p  |
| EIF4G3 | hsa-miR-1651-3p  |
| EIF4G3 | hsa-miR-488-3p   |
| EIF4G3 | hsa-miR-2404     |
| EIF4G3 | hsa-miR-6951-5p  |
| EIF4G3 | hsa-miR-4643     |
| EIF4G3 | hsa-miR-7448-3p  |
| EIF4G3 | hsa-miR-7193-3p  |
| EIF4G3 | hsa-miR-4762-5p  |
| EIF4G3 | hsa-miR-3664-3p  |
| EIF4G3 | hsa-miR-378a-3p  |
| EIF4G3 | hsa-miR-2284q    |
| EIF4G3 | hsa-miR-7298-5p  |
| EIF4G3 | hsa-miR-8826     |
| EIF4G3 | hsa-miR-7159-3p  |
| EIF4G3 | hsa-miR-6901-3p  |
| EIF4G3 | hsa-miR-5689     |

|        |                  |
|--------|------------------|
| EIF4G3 | hsa-miR-381-3p   |
| EIF4G3 | hsa-miR-883a-5p  |
| EIF4G3 | hsa-miR-6864-5p  |
| EIF4G3 | hsa-miR-3156-3p  |
| EIF4G3 | hsa-miR-7398r-3p |
| EIF4G3 | hsa-miR-7193-5p  |
| EIF4G3 | hsa-miR-216      |
| EIF4G3 | hsa-miR-687      |
| EIF4G3 | hsa-miR-1912-3p  |
| EIF4G3 | hsa-miR-7282-5p  |
| EIF4G3 | hsa-miR-2052     |
| EIF4G3 | hsa-miR-2284m    |
| EIF4G3 | hsa-miR-4301     |
| EIF4G3 | hsa-miR-4762-3p  |
| EIF4G3 | hsa-miR-4446-5p  |
| EIF4G3 | hsa-miR-26-2-3p  |
| EIF4G3 | hsa-miR-616-5p   |
| EIF4G3 | hsa-miR-300      |
| EIF4G3 | hsa-miR-875      |
| EIF4G3 | hsa-miR-455-3p   |
| EIF4G3 | hsa-miR-6845-3p  |
| EIF4G3 | hsa-miR-4765     |
| EIF4G3 | hsa-miR-512      |
| EIF4G3 | hsa-miR-7474-3p  |
| EIF4G3 | hsa-miR-34bc-3p  |
| EIF4G3 | hsa-miR-1781-3p  |
| EIF4G3 | hsa-miR-6930-3p  |
| EIF4G3 | hsa-miR-7188-5p  |
| EIF4G3 | hsa-miR-1642     |
| EIF4G3 | hsa-miR-7063-5p  |
| EIF4G3 | hsa-miR-101-3p.1 |
| EIF4G3 | hsa-miR-1603     |
| EIF4G3 | hsa-miR-520f-5p  |
| EIF4G3 | hsa-miR-6832-3p  |
| EIF4G3 | hsa-miR-1241     |
| EIF4G3 | hsa-miR-6651-5p  |
| EIF4G3 | hsa-miR-3105-5p  |
| EIF4G3 | hsa-miR-362-5p   |
| EIF4G3 | hsa-miR-4666a-3p |
| EIF4G3 | hsa-miR-466i-3p  |
| EIF4G3 | hsa-miR-516-3p   |
| EIF4G3 | hsa-miR-7386d-5p |
| EIF4G3 | hsa-miR-191-3p   |
| EIF4G3 | hsa-miR-770-5p   |
| EIF4G3 | hsa-miR-7338-5p  |
| EIF4G3 | hsa-miR-153-5p   |

|        |                   |
|--------|-------------------|
| EIF4G3 | hsa-miR-378d      |
| EIF4G3 | hsa-miR-423-5p    |
| EIF4G3 | hsa-miR-6667-5p   |
| EIF4G3 | hsa-miR-7469-3p   |
| EIF4G3 | hsa-miR-6896-3p   |
| EIF4G3 | hsa-miR-8829      |
| EIF4G3 | hsa-miR-7286-5p   |
| EIF4G3 | hsa-miR-1256      |
| EIF4G3 | hsa-miR-1798-3p   |
| EIF4G3 | hsa-miR-4652-3p   |
| EIF4G3 | hsa-miR-293-5p    |
| EIF4G3 | hsa-miR-2284x     |
| EIF4G3 | hsa-miR-3530-5p   |
| EIF4G3 | hsa-miR-7191-5p   |
| EIF4G3 | hsa-miR-6887-3p   |
| EIF4G3 | hsa-miR-6833-3p   |
| EIF4G3 | hsa-miR-149-3p    |
| EIF4G3 | hsa-miR-1704      |
| EIF4G3 | hsa-miR-5588-5p   |
| EIF4G3 | hsa-miR-8839      |
| EIF4G3 | hsa-miR-3167-5p   |
| EIF4G3 | hsa-miR-6549-3p   |
| EIF4G3 | hsa-miR-140-5p    |
| EIF4G3 | hsa-miR-7463-3p   |
| EIF4G3 | hsa-miR-3679-3p   |
| EIF4G3 | hsa-miR-7299-5p   |
| EIF4G3 | hsa-miR-374-5p    |
| EIF4G3 | hsa-miR-670-3p    |
| EIF4G3 | hsa-miR-495-3p    |
| EIF4G3 | hsa-miR-8064      |
| EIF4G3 | hsa-miR-8844      |
| EIF4G3 | hsa-miR-4482-3p   |
| EIF4G3 | hsa-miR-2359      |
| EIF4G3 | hsa-miR-7678-5p   |
| EIF4G3 | hsa-miR-3561-3p   |
| EIF4G3 | hsa-miR-539-3p    |
| EIF4G3 | hsa-miR-290a-5p   |
| EIF4G3 | hsa-miR-6990-5p   |
| EIF4G3 | hsa-miR-7371d-5p  |
| EIF4G3 | hsa-miR-8841      |
| EIF4G3 | hsa-let-7abf-3p   |
| EIF4G3 | hsa-miR-7856-5p   |
| EIF4G3 | hsa-miR-466b-2-3p |
| EIF4G3 | hsa-miR-1966-3p   |
| EIF4G3 | hsa-miR-520gh     |
| EIF4G3 | hsa-miR-422       |

|        |                 |
|--------|-----------------|
| EIF4G3 | hsa-miR-7049-5p |
| EIF4G3 | hsa-miR-7169-3p |
| EIF4G3 | hsa-miR-6940-5p |
| EIF4G3 | hsa-miR-2284z   |
| EIF4G3 | hsa-miR-1759-5p |
| EIF4G3 | hsa-miR-4428    |
| EIF4G3 | hsa-miR-6738-3p |
| EIF4G3 | hsa-miR-26-3p   |
| EIF4G3 | hsa-miR-580     |
| EIF4G3 | hsa-let-7f-1-3p |
| EIF4G3 | hsa-miR-1550-3p |
| EIF4G3 | hsa-miR-1786    |
| EIF4G3 | hsa-miR-7011-3p |
| EIF4G3 | hsa-miR-2373-5p |
| EIF4G3 | hsa-miR-7678-3p |
| EIF4G3 | hsa-miR-19-5p   |
| EIF4G3 | hsa-miR-6529b   |
| EIF4G3 | hsa-miR-933     |
| EIF4G3 | hsa-miR-511-5p  |
| EIF4G3 | hsa-miR-3182    |
| EIF4G3 | hsa-miR-299b-5p |
| EIF4G3 | hsa-miR-7156-5p |
| EIF4G3 | hsa-miR-140-5p  |
| EIF4G3 | hsa-miR-561-3p  |
| EIF4G3 | hsa-miR-3613b   |
| EIF4G3 | hsa-miR-6873-3p |
| EIF4G3 | hsa-miR-342-5p  |
| EIF4G3 | hsa-miR-335-5p  |
| EIF4G3 | hsa-miR-294-5p  |
| EIF4G3 | hsa-miR-6558-3p |
| EIF4G3 | hsa-miR-655     |
| EIF4G3 | hsa-miR-29-5p   |
| EIF4G3 | hsa-miR-6358    |
| EIF4G3 | hsa-miR-8793    |
| EIF4G3 | hsa-miR-2343    |
| EIF4G3 | hsa-miR-3616-5p |
| EIF4G3 | hsa-miR-2301    |
| EIF4G3 | hsa-miR-19b-5p  |
| EIF4G3 | hsa-miR-2970-3p |
| EIF4G3 | hsa-miR-2451    |
| EIF4G3 | hsa-miR-1306-5p |
| EIF4G3 | hsa-miR-4744    |
| EIF4G3 | hsa-miR-509-3p  |
| EIF4G3 | hsa-miR-6613-3p |
| EIF4G3 | hsa-let-7b-3p   |
| EIF4G3 | hsa-miR-548t-5p |

|        |                   |
|--------|-------------------|
| EIF4G3 | hsa-miR-5132-5p   |
| EIF4G3 | hsa-miR-5130      |
| EIF4G3 | hsa-miR-7032-5p   |
| EIF4G3 | hsa-miR-1434-3p   |
| EIF4G3 | hsa-miR-3572      |
| EIF4G3 | hsa-miR-548n      |
| EIF4G3 | hsa-miR-3075-3p   |
| EIF4G3 | hsa-miR-577-3p    |
| EIF4G3 | hsa-miR-561-3p    |
| EIF4G3 | hsa-miR-2116-5p   |
| EIF4G3 | hsa-miR-6962-5p   |
| EIF4G3 | hsa-miR-626       |
| EIF4G3 | hsa-miR-770       |
| EIF4G3 | hsa-miR-7386e-5p  |
| EIF4G3 | hsa-miR-21-3p     |
| EIF4G3 | hsa-miR-1260a     |
| EIF4G3 | hsa-miR-6338      |
| EIF4G3 | hsa-miR-3102-3p   |
| EIF4G3 | hsa-miR-4509      |
| EIF4G3 | hsa-miR-496       |
| EIF4G3 | hsa-miR-4433a-3p  |
| EIF4G3 | hsa-miR-125b-1-3p |
| EIF4G3 | hsa-miR-6842-5p   |
| EIF4G3 | hsa-miR-6595-5p   |
| EIF4G3 | hsa-miR-7682-5p   |
| EIF4G3 | hsa-miR-4720-5p   |
| EIF4G3 | hsa-miR-4477a     |
| EIF4G3 | hsa-miR-619       |
| EIF4G3 | hsa-miR-2284y     |
| EIF4G3 | hsa-miR-6572-5p   |
| EIF4G3 | hsa-miR-1324      |
| EIF4G3 | hsa-miR-6407      |
| EIF4G3 | hsa-miR-4516      |
| EIF4G3 | hsa-miR-517-3p    |
| EIF4G3 | hsa-miR-6401      |
| EIF4G3 | hsa-miR-8867      |
| EIF4G3 | hsa-miR-7331-2-3p |
| EIF4G3 | hsa-miR-665-3p    |
| EIF4G3 | hsa-miR-2293      |
| EIF4G3 | hsa-miR-292b-5p   |
| EIF4G3 | hsa-miR-3121-3p   |
| EIF4G3 | hsa-miR-7442-3p   |
| EIF4G3 | hsa-miR-373-3p    |
| EIF4G3 | hsa-miR-5702      |
| EIF4G3 | hsa-miR-2473      |
| EIF4G3 | hsa-miR-7351-3p   |



|        |                   |
|--------|-------------------|
| EIF4G3 | hsa-miR-6761-5p   |
| EIF4G3 | hsa-miR-2453      |
| EIF4G3 | hsa-miR-3059-5p   |
| EIF4G3 | hsa-miR-143-5p    |
| EIF4G3 | hsa-miR-224-5p    |
| EIF4G3 | hsa-miR-181-5p    |
| EIF4G3 | hsa-miR-8881      |
| EIF4G3 | hsa-miR-6795-3p   |
| EIF4G3 | hsa-miR-2901      |
| EIF4G3 | hsa-miR-1250-3p   |
| EIF4G3 | hsa-miR-1983      |
| EIF4G3 | hsa-miR-466b-4-3p |
| EIF4G3 | hsa-miR-7857      |
| EIF4G3 | hsa-miR-1238-3p   |
| EIF4G3 | hsa-miR-548az-5p  |
| EIF4G3 | hsa-miR-4445-5p   |
| EIF4G3 | hsa-miR-214-3p    |
| EIF4G3 | hsa-miR-3531-3p   |
| EIF4G3 | hsa-miR-335-5p    |
| EIF4G3 | hsa-miR-2284n     |
| EIF4G3 | hsa-miR-6792-3p   |
| EIF4G3 | hsa-miR-362-3p    |
| EIF4G3 | hsa-miR-7366-5p   |
| EIF4G3 | hsa-miR-544a      |
| EIF4G3 | hsa-miR-6794-3p   |
| EIF4G3 | hsa-miR-154-5p    |
| EIF4G3 | hsa-miR-1910-5p   |
| EIF4G3 | hsa-miR-4699-3p   |
| EIF4G3 | hsa-miR-302       |
| EIF4G3 | hsa-miR-6528      |
| EIF4G3 | hsa-miR-1249-5p   |
| EIF4G3 | hsa-miR-290       |
| EIF4G3 | hsa-miR-1305      |
| EIF4G3 | hsa-miR-7648-3p   |
| EIF4G3 | hsa-miR-7031-5p   |
| EIF4G3 | hsa-miR-292a-5p   |
| EIF4G3 | hsa-miR-5125-5p   |
| EIF4G3 | hsa-miR-7680-5p   |
| EIF4G3 | hsa-miR-6883-5p   |
| EIF4G3 | hsa-miR-146a-3p   |
| EIF4G3 | hsa-miR-3200-3p   |
| EIF4G3 | hsa-miR-4452      |
| EIF4G3 | hsa-miR-1894-3p   |
| EIF4G3 | hsa-miR-4653-3p   |
| EIF4G3 | hsa-miR-1711      |
| EIF4G3 | hsa-miR-7078-3p   |

|        |                  |
|--------|------------------|
| EIF4G3 | hsa-miR-2466-5p  |
| EIF4G3 | hsa-miR-216a     |
| EIF4G3 | hsa-miR-147a     |
| EIF4G3 | hsa-miR-695      |
| EIF4G3 | hsa-miR-518-5p   |
| EIF4G3 | hsa-miR-7469-5p  |
| EIF4G3 | hsa-miR-7200-5p  |
| EIF4G3 | hsa-miR-7212-3p  |
| EIF4G3 | hsa-miR-6808-5p  |
| EIF4G3 | hsa-miR-7657-3p  |
| EIF4G3 | hsa-miR-154a     |
| EIF4G3 | hsa-miR-361-3p   |
| EIF4G3 | hsa-miR-3066-3p  |
| EIF4G3 | hsa-miR-1278     |
| EIF4G3 | hsa-miR-145-5p   |
| EIF4G3 | hsa-miR-2385-3p  |
| EIF4G3 | hsa-miR-326      |
| EIF4G3 | hsa-miR-7262b-5p |
| EIF4G3 | hsa-miR-7188-3p  |
| EIF4G3 | hsa-miR-142-5p   |
| EIF4G3 | hsa-miR-4738-3p  |
| EIF4G3 | hsa-miR-7372-5p  |
| EIF4G3 | hsa-miR-669b-5p  |
| EIF4G3 | hsa-miR-8096     |
| EIF4G3 | hsa-miR-432-5p   |
| EIF4G3 | hsa-miR-3664-5p  |
| EIF4G3 | hsa-miR-573      |
| EIF4G3 | hsa-miR-4258     |
| EIF4G3 | hsa-miR-575      |
| EIF4G3 | hsa-miR-378-3p   |
| EIF4G3 | hsa-miR-6628-3p  |
| EIF4G3 | hsa-miR-1896     |
| EIF4G3 | hsa-miR-1720-5p  |
| EIF4G3 | hsa-miR-452-5p   |
| EIF4G3 | hsa-miR-467f     |
| EIF4G3 | hsa-miR-6627-3p  |
| EIF4G3 | hsa-miR-8802     |
| EIF4G3 | hsa-miR-497-3p   |
| EIF4G3 | hsa-miR-378h     |
| EIF4G3 | hsa-miR-3587     |
| EIF4G3 | hsa-miR-371b-5p  |
| EIF4G3 | hsa-miR-375-3p   |
| EIF4G3 | hsa-miR-7480-5p  |
| EIF4G3 | hsa-miR-1655-3p  |
| EIF4G3 | hsa-miR-106a-3p  |
| EIF4G3 | hsa-miR-532-5p   |

|        |                 |
|--------|-----------------|
| EIF4G3 | hsa-miR-517     |
| EIF4G3 | hsa-miR-2285x   |
| EIF4G3 | hsa-miR-466l-3p |
| EIF4G3 | hsa-miR-382-5p  |
| EIF4G3 | hsa-miR-345-3p  |
| EIF4G3 | hsa-let-7j-3p   |
| EIF4G3 | hsa-miR-17-3p   |
| EIF4G3 | hsa-miR-520g-3p |
| EIF4G3 | hsa-miR-4636    |
| EIF4G3 | hsa-miR-2285b   |
| EIF4G3 | hsa-miR-150-5p  |
| EIF4G3 | hsa-miR-4472    |
| EIF4G3 | hsa-miR-141-3p  |
| EIF4G3 | hsa-miR-4713-5p |
| EIF4G3 | hsa-miR-7290-3p |
| EIF4G3 | hsa-miR-202-3p  |
| EIF4G3 | hsa-miR-1844    |
| EIF4G3 | hsa-miR-514b-5p |
| EIF4G3 | hsa-miR-1647    |
| EIF4G3 | hsa-let-7f-2-3p |
| EIF4G3 | hsa-miR-1657    |
| EIF4G3 | hsa-miR-10      |
| EIF4G3 | hsa-miR-2471-3p |
| EIF4G3 | hsa-miR-302a-3p |
| EIF4G3 | hsa-miR-3057-5p |
| EIF4G3 | hsa-miR-6871-3p |
| EIF4G3 | hsa-miR-666-3p  |
| EIF4G3 | hsa-miR-378i    |
| EIF4G3 | hsa-miR-876-5p  |
| EIF4G3 | hsa-miR-3105-3p |
| EIF4G3 | hsa-miR-432-5p  |
| EIF4G3 | hsa-miR-6951-3p |
| EIF4G3 | hsa-miR-130b-5p |
| EIF4G3 | hsa-miR-7677-3p |
| EIF4G3 | hsa-miR-6649-5p |
| EIF4G3 | hsa-miR-7006-3p |
| EIF4G3 | hsa-miR-570-3p  |
| EIF4G3 | hsa-miR-6955-3p |
| EIF4G3 | hsa-miR-6835-5p |
| EIF4G3 | hsa-miR-4753-3p |
| EIF4G3 | hsa-miR-4671-3p |
| EIF4G3 | hsa-miR-129-5p  |
| EIF4G3 | hsa-miR-6802-3p |
| EIF4G3 | hsa-miR-8823    |
| EIF4G3 | hsa-miR-8838    |
| EIF4G3 | hsa-miR-937-5p  |

|        |                  |
|--------|------------------|
| EIF4G3 | hsa-miR-7385b-3p |
| EIF4G3 | hsa-miR-709      |
| EIF4G3 | hsa-miR-532-3p   |
| EIF4G3 | hsa-miR-107-3p   |
| EIF4G3 | hsa-miR-6752-5p  |
| EIF4G3 | hsa-miR-205-5p   |
| EIF4G3 | hsa-miR-6893-5p  |
| EIF4G3 | hsa-miR-470-5p   |
| EIF4G3 | hsa-miR-1301-5p  |
| EIF4G3 | hsa-miR-6216     |
| EIF4G3 | hsa-miR-1460     |
| EIF4G3 | hsa-miR-495-5p   |
| EIF4G3 | hsa-miR-7650-3p  |
| EIF4G3 | hsa-miR-4514     |
| EIF4G3 | hsa-miR-145-5p   |
| EIF4G3 | hsa-miR-1190     |
| EIF4G3 | hsa-miR-7222-3p  |
| EIF4G3 | hsa-miR-29a-1-5p |
| EIF4G3 | hsa-miR-6826-3p  |
| EIF4G3 | hsa-miR-513c-5p  |
| EIF4G3 | hsa-miR-3536     |
| EIF4G3 | hsa-miR-7027-3p  |
| EIF4G3 | hsa-miR-1544-3p  |
| EIF4G3 | hsa-miR-544a     |
| EIF4G3 | hsa-miR-541-3p   |
| EIF4G3 | hsa-miR-6565-3p  |
| EIF4G3 | hsa-miR-29b-5p   |
| EIF4G3 | hsa-miR-7020-3p  |
| EIF4G3 | hsa-miR-378      |
| EIF4G3 | hsa-miR-942-5p   |
| EIF4G3 | hsa-miR-1756b    |
| EIF4G3 | hsa-miR-95-5p    |
| EIF4G3 | hsa-miR-4310     |
| EIF4G3 | hsa-miR-8825     |
| EIF4G3 | hsa-miR-140-3p.1 |
| EIF4G3 | hsa-miR-703      |
| EIF4G3 | hsa-miR-292-5p   |
| EIF4G3 | hsa-miR-513a-3p  |
| EIF4G3 | hsa-miR-3144-3p  |
| EIF4G3 | hsa-miR-2362     |
| EIF4G3 | hsa-miR-3198     |
| EIF4G3 | hsa-miR-4639-3p  |
| EIF4G3 | hsa-miR-6938-5p  |
| EIF4G3 | hsa-miR-26-5p    |
| EIF4G3 | hsa-miR-509-3p   |
| EIF4G3 | hsa-miR-3924     |

|        |                  |
|--------|------------------|
| EIF4G3 | hsa-miR-6997-3p  |
| EIF4G3 | hsa-miR-655-3p   |
| EIF4G3 | hsa-miR-6639-5p  |
| EIF4G3 | hsa-miR-6126     |
| EIF4G3 | hsa-miR-633      |
| EIF4G3 | hsa-miR-5584-5p  |
| EIF4G3 | hsa-miR-543-5p   |
| EIF4G3 | hsa-miR-6331     |
| EIF4G3 | hsa-miR-7035-5p  |
| EIF4G3 | hsa-miR-6803-5p  |
| EIF4G3 | hsa-miR-3200-3p  |
| EIF4G3 | hsa-miR-3615     |
| EIF4G3 | hsa-miR-2421     |
| EIF4G3 | hsa-miR-467-3p   |
| EIF4G3 | hsa-miR-148-5p   |
| EIF4G3 | hsa-miR-1721     |
| EIF4G3 | hsa-miR-8068     |
| EIF4G3 | hsa-miR-6797-5p  |
| EIF4G3 | hsa-miR-320-5p   |
| EIF4G3 | hsa-miR-224-5p   |
| EIF4G3 | hsa-miR-3591-5p  |
| EIF4G3 | hsa-miR-375      |
| EIF4G3 | hsa-miR-297      |
| EIF4G3 | hsa-miR-532-5p   |
| EIF4G3 | hsa-miR-1643-3p  |
| EIF4G3 | hsa-miR-548av-3p |
| EIF4G3 | hsa-miR-455-3p.2 |
| EIF4G3 | hsa-miR-579-3p   |
| EIF4G3 | hsa-miR-2325c    |
| EIF4G3 | hsa-miR-223-5p   |
| EIF4G3 | hsa-miR-876      |
| EIF4G3 | hsa-miR-5619-3p  |
| EIF4G3 | hsa-miR-2284a    |
| EIF4G3 | hsa-miR-101-3p   |
| EIF4G3 | hsa-miR-92b-5p   |
| EIF4G3 | hsa-miR-4639-5p  |
| EIF4G3 | hsa-miR-2284aa   |
| EIF4G3 | hsa-miR-1904     |
| EIF4G3 | hsa-miR-7319-5p  |
| EIF4G3 | hsa-miR-7665-5p  |
| EIF4G3 | hsa-miR-4691-5p  |
| EIF4G3 | hsa-miR-4447     |
| EIF4G3 | hsa-miR-6924-3p  |
| EIF4G3 | hsa-miR-5586-5p  |
| EIF4G3 | hsa-miR-26b-3p   |
| EIF4G3 | hsa-miR-22-3p    |

|        |                  |
|--------|------------------|
| EIF4G3 | hsa-miR-607      |
| EIF4G3 | hsa-miR-2284j    |
| EIF4G3 | hsa-miR-7661-5p  |
| EIF4G3 | hsa-miR-379-3p   |
| EIF4G3 | hsa-miR-29-3p    |
| EIF4G3 | hsa-miR-340-3p   |
| EIF4G3 | hsa-miR-1737     |
| EIF4G3 | hsa-miR-511      |
| EIF4G3 | hsa-miR-8843     |
| EIF4G3 | hsa-miR-3609     |
| EIF4G3 | hsa-miR-7386g-5p |
| EIF4G3 | hsa-miR-6608-3p  |
| EIF4G3 | hsa-miR-7347-3p  |
| EIF4G3 | hsa-miR-7276-3p  |
| EIF4G3 | hsa-miR-4670-3p  |
| EIF4G3 | hsa-miR-6751-5p  |
| EIF4G3 | hsa-miR-411-3p   |
| EIF4G3 | hsa-miR-7110-5p  |
| EIF4G3 | hsa-miR-4518     |
| EIF4G3 | hsa-miR-2310     |
| EIF4G3 | hsa-miR-1248     |
| EIF4G3 | hsa-miR-3973     |
| EIF4G3 | hsa-miR-7481-5p  |
| EIF4G3 | hsa-miR-4307     |
| EIF4G3 | hsa-miR-369-3p   |
| EIF4G3 | hsa-miR-7244-3p  |
| EIF4G3 | hsa-miR-1933-3p  |
| EIF4G3 | hsa-miR-130a-5p  |
| EIF4G3 | hsa-miR-6582-3p  |
| EIF4G3 | hsa-miR-8884     |
| EIF4G3 | hsa-miR-7034-3p  |
| EIF4G3 | hsa-miR-603      |
| EIF4G3 | hsa-miR-3140-3p  |
| EIF4G3 | hsa-miR-548c-3p  |
| EIF4G3 | hsa-miR-4679     |
| EIF4G3 | hsa-miR-4459     |
| EIF4G3 | hsa-miR-6134     |
| EIF4G3 | hsa-miR-31-3p    |
| EIF4G3 | hsa-miR-1625-3p  |
| EIF4G3 | hsa-miR-8848     |
| EIF4G3 | hsa-miR-1597-5p  |
| EIF4G3 | hsa-miR-6885-3p  |
| EIF4G3 | hsa-miR-6782-3p  |
| EIF4G3 | hsa-miR-378c     |
| EIF4G3 | hsa-miR-1910-3p  |
| EIF4G3 | hsa-miR-520-3p   |

|        |                  |
|--------|------------------|
| EIF4G3 | hsa-miR-3533     |
| EIF4G3 | hsa-miR-7293-5p  |
| EIF4G3 | hsa-miR-674-3p   |
| EIF4G3 | hsa-miR-147-3p   |
| EIF4G3 | hsa-miR-4768-5p  |
| EIF4G3 | hsa-miR-520f-3p  |
| EIF4G3 | hsa-miR-7691     |
| EIF4G3 | hsa-miR-2393     |
| EIF4G3 | hsa-miR-2285     |
| EIF4G3 | hsa-miR-295-5p   |
| EIF4G3 | hsa-miR-1304-3p  |
| EIF4G3 | hsa-miR-659-3p   |
| EIF4G3 | hsa-miR-1814     |
| EIF4G3 | hsa-miR-3675-3p  |
| EIF4G3 | hsa-miR-6119-3p  |
| EIF4G3 | hsa-let-7afk-3p  |
| EIF4G3 | hsa-miR-7333-5p  |
| EIF4G3 | hsa-miR-3083-5p  |
| EIF4G3 | hsa-miR-503-3p   |
| EIF4G3 | hsa-miR-5623-3p  |
| EIF4G3 | hsa-miR-6545-5p  |
| EIF4G3 | hsa-miR-3473f    |
| EIF4G3 | hsa-miR-2284v    |
| EIF4G3 | hsa-miR-2367-3p  |
| EIF4G3 | hsa-miR-7371j-5p |
| EIF4G3 | hsa-miR-875-5p   |
| EIF4G3 | hsa-miR-183-5p   |
| EIF4G3 | hsa-miR-2305     |
| EIF4G3 | hsa-miR-2116-3p  |
| EIF4G3 | hsa-miR-1663-5p  |
| EIF4G3 | hsa-miR-6502-5p  |
| EIF4G3 | hsa-miR-6516     |
| EIF4G3 | hsa-miR-652-3p   |
| EIF4G3 | hsa-miR-103-5p   |
| EIF4G3 | hsa-miR-4273     |
| EIF4G3 | hsa-miR-940      |
| EIF4G3 | hsa-miR-434-3p   |
| EIF4G3 | hsa-miR-18b-3p   |
| EIF4G3 | hsa-miR-129b-5p  |
| EIF4G3 | hsa-miR-7864     |
| EIF4G3 | hsa-miR-7398e-3p |
| EIF4G3 | hsa-miR-7459-5p  |
| EIF4G3 | hsa-miR-200a-3p  |
| EIF4G3 | hsa-miR-6858-3p  |
| EIF4G3 | hsa-miR-2284-5p  |
| EIF4G3 | hsa-miR-3089-3p  |

|        |                  |
|--------|------------------|
| EIF4G3 | hsa-miR-3090-3p  |
| EIF4G3 | hsa-miR-373-5p   |
| EIF4G3 | hsa-miR-763      |
| EIF4G3 | hsa-miR-6892-3p  |
| EIF4G3 | hsa-miR-1930-5p  |
| EIF4G3 | hsa-miR-7466-3p  |
| EIF4G3 | hsa-miR-6749-3p  |
| EIF4G3 | hsa-miR-6757-3p  |
| EIF4G3 | hsa-miR-6958-3p  |
| EIF4G3 | hsa-miR-627-3p   |
| EIF4G3 | hsa-miR-2284d    |
| EIF4G3 | hsa-miR-6785-5p  |
| EIF4G3 | hsa-let-7-3p     |
| EIF4G3 | hsa-miR-2284c    |
| EIF4G3 | hsa-miR-1773-5p  |
| EIF4G3 | hsa-miR-6511a-5p |
| EIF4G3 | hsa-miR-371a-5p  |
| EIF4G3 | hsa-miR-2388-5p  |
| EIF4G3 | hsa-miR-2342     |
| EIF4G3 | hsa-miR-1897-5p  |
| EIF4G3 | hsa-miR-107-5p   |
| EIF4G3 | hsa-miR-2285z    |
| EIF4G3 | hsa-miR-4433b-3p |
| EIF4G3 | hsa-miR-7394b-5p |
| EIF4G3 | hsa-miR-7114-5p  |
| EIF4G3 | hsa-miR-6345     |
| EIF4G3 | hsa-miR-7166-5p  |
| EIF4G3 | hsa-miR-6516-5p  |
| EIF4G3 | hsa-miR-3594-5p  |
| EIF4G3 | hsa-miR-361-5p   |
| EIF4G3 | hsa-miR-512-3p   |
| EIF4G3 | hsa-miR-7116-3p  |
| EIF4G3 | hsa-miR-1827     |
| EIF4G3 | hsa-miR-6548-3p  |
| EIF4G3 | hsa-miR-8824     |
| EIF4G3 | hsa-miR-8062     |
| EIF4G3 | hsa-miR-7437-3p  |
| EIF4G3 | hsa-miR-1948-5p  |
| EIF4G3 | hsa-miR-488-3p   |
| EIF4G3 | hsa-miR-7258-3p  |
| EIF4G3 | hsa-miR-7226-5p  |
| EIF4G3 | hsa-miR-498      |
| EIF4G3 | hsa-miR-378b     |
| EIF4G3 | hsa-miR-7257-3p  |
| EIF4G3 | hsa-miR-339-3p   |
| EIF4G3 | hsa-miR-1251-3p  |



|        |                   |
|--------|-------------------|
| EIF4G3 | hsa-miR-196b-3p   |
| EIF4G3 | hsa-miR-6728-3p   |
| EIF4G3 | hsa-miR-1266-5p   |
| EIF4G3 | hsa-miR-4666a-5p  |
| EIF4G3 | hsa-miR-450a      |
| EIF4G3 | hsa-miR-1693      |
| EIF4G3 | hsa-miR-1185-3p   |
| EIF4G3 | hsa-miR-3145-3p   |
| EIF4G3 | hsa-miR-6739-3p   |
| EIF4G3 | hsa-miR-3065-3p   |
| EIF4G3 | hsa-miR-6650-5p   |
| EIF4G3 | hsa-miR-6813-3p   |
| EIF4G3 | hsa-miR-378e      |
| EIF4G3 | hsa-miR-7278-3p   |
| EIF4G3 | hsa-miR-382-5p    |
| EIF4G3 | hsa-miR-21-5p     |
| EIF4G3 | hsa-miR-3080-3p   |
| EIF4G3 | hsa-miR-3547      |
| EIF4G3 | hsa-miR-665       |
| EIF4G3 | hsa-miR-6540-3p   |
| EIF4G3 | hsa-miR-7331-1-3p |
| EIF4G3 | hsa-miR-540-5p    |
| EIF4G3 | hsa-miR-513c-3p   |
| EIF4G3 | hsa-miR-7386h-5p  |
| EIF4G3 | hsa-miR-2399-5p   |
| EIF4G3 | hsa-miR-429-5p    |
| EIF4G3 | hsa-miR-4464      |
| GEMIN5 | hsa-miR-1245a     |
| GEMIN5 | hsa-miR-6998-3p   |
| GEMIN5 | hsa-miR-21-3p     |
| GEMIN5 | hsa-miR-6808-5p   |
| GEMIN5 | hsa-miR-6989-5p   |
| GEMIN5 | hsa-miR-7398t-3p  |
| GEMIN5 | hsa-miR-296-5p    |
| GEMIN5 | hsa-miR-124       |
| GEMIN5 | hsa-miR-6507-5p   |
| GEMIN5 | hsa-miR-8880      |
| GEMIN5 | hsa-miR-7068-3p   |
| GEMIN5 | hsa-miR-3974      |
| GEMIN5 | hsa-miR-1199-5p   |
| GEMIN5 | hsa-miR-505-3p.1  |
| GEMIN5 | hsa-miR-2285r     |
| GEMIN5 | hsa-miR-3559-5p   |
| GEMIN5 | hsa-miR-33-3p     |
| GEMIN5 | hsa-miR-548q      |
| GEMIN5 | hsa-miR-3562      |

|        |                  |
|--------|------------------|
| GEMIN5 | hsa-miR-2284l    |
| GEMIN5 | hsa-miR-6944-5p  |
| GEMIN5 | hsa-miR-548ay-3p |
| GEMIN5 | hsa-miR-292a-5p  |
| GEMIN5 | hsa-miR-548f-3p  |
| GEMIN5 | hsa-miR-2285j    |
| GEMIN5 | hsa-miR-1230     |
| GEMIN5 | hsa-miR-4322     |
| GEMIN5 | hsa-miR-371      |
| GEMIN5 | hsa-miR-34b-3p   |
| GEMIN5 | hsa-miR-568      |
| GEMIN5 | hsa-miR-642a-5p  |
| GEMIN5 | hsa-miR-6719-3p  |
| GEMIN5 | hsa-miR-507b     |
| GEMIN5 | hsa-miR-181c-3p  |
| GEMIN5 | hsa-miR-6823-5p  |
| GEMIN5 | hsa-miR-3569     |
| GEMIN5 | hsa-miR-1245b-3p |
| GEMIN5 | hsa-miR-369-3p   |
| GEMIN5 | hsa-miR-5118     |
| GEMIN5 | hsa-miR-607      |
| GEMIN5 | hsa-miR-3108-5p  |
| GEMIN5 | hsa-miR-3057-3p  |
| GEMIN5 | hsa-miR-548aj-5p |
| GEMIN5 | hsa-miR-4792     |
| GEMIN5 | hsa-miR-3658     |
| GEMIN5 | hsa-miR-6905-3p  |
| GEMIN5 | hsa-miR-880-3p   |
| GEMIN5 | hsa-miR-505-3p   |
| GEMIN5 | hsa-miR-379-3p   |
| GEMIN5 | hsa-miR-7217-5p  |
| GEMIN5 | hsa-miR-3533     |
| GEMIN5 | hsa-miR-7017-3p  |
| GEMIN5 | hsa-miR-6907-5p  |
| GEMIN5 | hsa-miR-7087-3p  |
| GEMIN5 | hsa-miR-17-5p    |
| GEMIN5 | hsa-miR-7854-3p  |
| GEMIN5 | hsa-miR-450b-3p  |
| GEMIN5 | hsa-miR-2339     |
| GEMIN5 | hsa-miR-3964     |
| GEMIN5 | hsa-miR-7379-5p  |
| GEMIN5 | hsa-miR-205-3p   |
| GEMIN5 | hsa-miR-6888-5p  |
| GEMIN5 | hsa-miR-374      |
| GEMIN5 | hsa-miR-570-3p   |
| GEMIN5 | hsa-miR-7116-5p  |

|        |                  |
|--------|------------------|
| GEMIN5 | hsa-miR-6971-3p  |
| GEMIN5 | hsa-miR-1262     |
| GEMIN5 | hsa-miR-579      |
| GEMIN5 | hsa-miR-6922-3p  |
| GEMIN5 | hsa-miR-3136-5p  |
| GEMIN5 | hsa-miR-7396-3p  |
| GEMIN5 | hsa-miR-500b-5p  |
| GEMIN5 | hsa-miR-224-5p   |
| GEMIN5 | hsa-miR-581      |
| GEMIN5 | hsa-miR-7351-5p  |
| GEMIN5 | hsa-miR-654-5p   |
| GEMIN5 | hsa-miR-1184     |
| GEMIN5 | hsa-miR-338-5p   |
| GEMIN5 | hsa-miR-656      |
| GEMIN5 | hsa-miR-4763-3p  |
| GEMIN5 | hsa-miR-690      |
| GEMIN5 | hsa-miR-6715b-3p |
| GEMIN5 | hsa-miR-3151-3p  |
| GEMIN5 | hsa-miR-20       |
| GEMIN5 | hsa-miR-548x-5p  |
| GEMIN5 | hsa-miR-570-3p   |
| GEMIN5 | hsa-miR-186-5p   |
| GEMIN5 | hsa-miR-1546-5p  |
| GEMIN5 | hsa-miR-3154     |
| GEMIN5 | hsa-miR-642-3p   |
| GEMIN5 | hsa-miR-4256     |
| GEMIN5 | hsa-miR-6770-5p  |
| GEMIN5 | hsa-miR-6741-5p  |
| GEMIN5 | hsa-miR-331-5p   |
| GEMIN5 | hsa-miR-344f-5p  |
| GEMIN5 | hsa-miR-943      |
| GEMIN5 | hsa-miR-2285     |
| GEMIN5 | hsa-miR-215-3p   |
| GEMIN5 | hsa-miR-7280-5p  |
| GEMIN5 | hsa-miR-2284j    |
| GEMIN5 | hsa-miR-7039-3p  |
| GEMIN5 | hsa-miR-7386o-5p |
| GEMIN5 | hsa-miR-362-3p   |
| GEMIN5 | hsa-miR-6817-5p  |
| GEMIN5 | hsa-miR-6758-5p  |
| GEMIN5 | hsa-miR-1550-3p  |
| GEMIN5 | hsa-miR-551-5p   |
| GEMIN5 | hsa-miR-105b     |
| GEMIN5 | hsa-miR-4799-5p  |
| GEMIN5 | hsa-miR-1912-3p  |
| GEMIN5 | hsa-miR-8810     |

|        |                  |
|--------|------------------|
| GEMIN5 | hsa-miR-143-3p   |
| GEMIN5 | hsa-miR-1468-3p  |
| GEMIN5 | hsa-miR-4714-3p  |
| GEMIN5 | hsa-miR-1251-5p  |
| GEMIN5 | hsa-miR-4769-3p  |
| GEMIN5 | hsa-miR-323b-3p  |
| GEMIN5 | hsa-miR-548ax    |
| GEMIN5 | hsa-miR-4786-5p  |
| GEMIN5 | hsa-miR-4693-5p  |
| GEMIN5 | hsa-miR-7228-3p  |
| GEMIN5 | hsa-miR-548g-5p  |
| GEMIN5 | hsa-miR-7169-3p  |
| GEMIN5 | hsa-miR-660-5p   |
| GEMIN5 | hsa-miR-7053-5p  |
| GEMIN5 | hsa-miR-6936-5p  |
| GEMIN5 | hsa-miR-656-3p   |
| GEMIN5 | hsa-miR-4744     |
| GEMIN5 | hsa-miR-7672-5p  |
| GEMIN5 | hsa-miR-34b-5p   |
| GEMIN5 | hsa-miR-2387     |
| GEMIN5 | hsa-miR-124-3p.2 |
| GEMIN5 | hsa-miR-433-3p   |
| GEMIN5 | hsa-miR-9-5p     |
| GEMIN5 | hsa-miR-7028-3p  |
| GEMIN5 | hsa-miR-208a-5p  |
| GEMIN5 | hsa-miR-373-5p   |
| GEMIN5 | hsa-miR-200-3p   |
| GEMIN5 | hsa-miR-532-3p   |
| GEMIN5 | hsa-miR-2489     |
| GEMIN5 | hsa-miR-6864-5p  |
| GEMIN5 | hsa-miR-6792-5p  |
| GEMIN5 | hsa-miR-7011-5p  |
| GEMIN5 | hsa-miR-3089-3p  |
| GEMIN5 | hsa-miR-132-3p   |
| GEMIN5 | hsa-miR-449c-5p  |
| GEMIN5 | hsa-miR-3526     |
| GEMIN5 | hsa-miR-5107-5p  |
| GEMIN5 | hsa-miR-1200     |
| GEMIN5 | hsa-miR-5582-3p  |
| GEMIN5 | hsa-miR-6403     |
| GEMIN5 | hsa-miR-515-5p   |
| GEMIN5 | hsa-miR-26-3p    |
| GEMIN5 | hsa-miR-548ac    |
| GEMIN5 | hsa-miR-127-5p   |
| GEMIN5 | hsa-miR-700-5p   |
| GEMIN5 | hsa-miR-337-3p   |

|        |                   |
|--------|-------------------|
| GEMIN5 | hsa-miR-2303      |
| GEMIN5 | hsa-miR-3925-3p   |
| GEMIN5 | hsa-miR-4666a-5p  |
| GEMIN5 | hsa-miR-616-5p    |
| GEMIN5 | hsa-miR-3606-3p   |
| GEMIN5 | hsa-miR-214-3p    |
| GEMIN5 | hsa-miR-924       |
| GEMIN5 | hsa-miR-6507-3p   |
| GEMIN5 | hsa-miR-7685-5p   |
| GEMIN5 | hsa-miR-627-3p    |
| GEMIN5 | hsa-miR-425-5p    |
| GEMIN5 | hsa-miR-1205      |
| GEMIN5 | hsa-miR-2284b     |
| GEMIN5 | hsa-miR-7051-3p   |
| GEMIN5 | hsa-miR-433       |
| GEMIN5 | hsa-miR-7201-5p   |
| GEMIN5 | hsa-miR-4540      |
| GEMIN5 | hsa-miR-484       |
| GEMIN5 | hsa-miR-548f-5p   |
| GEMIN5 | hsa-miR-186-3p    |
| GEMIN5 | hsa-miR-7063-5p   |
| GEMIN5 | hsa-miR-4778-3p   |
| GEMIN5 | hsa-miR-3119      |
| GEMIN5 | hsa-miR-292b-5p   |
| GEMIN5 | hsa-miR-4282      |
| GEMIN5 | hsa-miR-7-3p      |
| GEMIN5 | hsa-miR-7182-3p   |
| GEMIN5 | hsa-miR-500a-5p   |
| GEMIN5 | hsa-miR-8068      |
| GEMIN5 | hsa-miR-7006-3p   |
| GEMIN5 | hsa-miR-5585-5p   |
| GEMIN5 | hsa-miR-494-3p    |
| GEMIN5 | hsa-miR-548ae-3p  |
| GEMIN5 | hsa-miR-6924-5p   |
| GEMIN5 | hsa-miR-1981-5p   |
| GEMIN5 | hsa-miR-548ao-5p  |
| GEMIN5 | hsa-miR-6988-5p   |
| GEMIN5 | hsa-miR-3653-3p   |
| GEMIN5 | hsa-miR-742-3p    |
| GEMIN5 | hsa-miR-181b-2-3p |
| GEMIN5 | hsa-miR-351-3p    |
| GEMIN5 | hsa-miR-320a      |
| GEMIN5 | hsa-miR-2466-5p   |
| GEMIN5 | hsa-miR-5007-3p   |
| GEMIN5 | hsa-miR-676-5p    |
| GEMIN5 | hsa-miR-6736-5p   |

|        |                 |
|--------|-----------------|
| GEMIN5 | hsa-miR-7365-3p |
| GEMIN5 | hsa-miR-1305    |
| GEMIN5 | hsa-miR-6927-3p |
| GEMIN5 | hsa-miR-6959-5p |
| GEMIN5 | hsa-miR-383     |
| GEMIN5 | hsa-miR-4418    |
| GEMIN5 | hsa-miR-7850-5p |
| GEMIN5 | hsa-miR-7005-5p |
| GEMIN5 | hsa-miR-203     |
| GEMIN5 | hsa-miR-3059-3p |
| GEMIN5 | hsa-miR-143-3p  |
| GEMIN5 | hsa-miR-8069    |
| GEMIN5 | hsa-miR-130b-5p |
| GEMIN5 | hsa-miR-17-3p   |
| GEMIN5 | hsa-miR-6958-3p |
| GEMIN5 | hsa-miR-153-5p  |
| GEMIN5 | hsa-miR-7019-5p |
| GEMIN5 | hsa-miR-7048-5p |
| GEMIN5 | hsa-miR-3660    |
| GEMIN5 | hsa-miR-4710    |
| GEMIN5 | hsa-miR-7118-5p |
| GEMIN5 | hsa-miR-548i-5p |
| GEMIN5 | hsa-miR-1182    |
| GEMIN5 | hsa-miR-425     |
| GEMIN5 | hsa-miR-191-3p  |
| GEMIN5 | hsa-miR-2284i   |
| GEMIN5 | hsa-miR-136-5p  |
| GEMIN5 | hsa-miR-561-3p  |
| GEMIN5 | hsa-miR-1967    |
| GEMIN5 | hsa-miR-2347    |
| GEMIN5 | hsa-miR-6529-5p |
| GEMIN5 | hsa-miR-3920    |
| GEMIN5 | hsa-miR-335-3p  |
| GEMIN5 | hsa-miR-4265    |
| GEMIN5 | hsa-miR-29a-5p  |
| GEMIN5 | hsa-miR-592     |
| GEMIN5 | hsa-miR-6974-3p |
| GEMIN5 | hsa-miR-664     |
| GEMIN5 | hsa-miR-7231-5p |
| GEMIN5 | hsa-miR-411-3p  |
| GEMIN5 | hsa-miR-509-5p  |
| GEMIN5 | hsa-miR-875-5p  |
| GEMIN5 | hsa-miR-561-3p  |
| GEMIN5 | hsa-miR-8079    |
| GEMIN5 | hsa-miR-7849-3p |
| GEMIN5 | hsa-miR-100-3p  |

|        |                 |
|--------|-----------------|
| GEMIN5 | hsa-miR-1298-3p |
| GEMIN5 | hsa-miR-761     |
| GEMIN5 | hsa-miR-4503    |
| GEMIN5 | hsa-miR-96-5p   |
| GEMIN5 | hsa-miR-677     |
| GEMIN5 | hsa-miR-199-5p  |
| GEMIN5 | hsa-miR-1257    |
| GEMIN5 | hsa-miR-1188-5p |
| GEMIN5 | hsa-miR-1245a   |
| GEMIN5 | hsa-miR-186-5p  |
| GEMIN5 | hsa-miR-6581-5p |
| GEMIN5 | hsa-miR-34      |
| GEMIN5 | hsa-miR-654-3p  |
| GEMIN5 | hsa-miR-3594-5p |
| GEMIN5 | hsa-miR-6943-5p |
| GEMIN5 | hsa-miR-488-3p  |
| GEMIN5 | hsa-miR-2284z   |
| GEMIN5 | hsa-miR-200a-3p |
| GEMIN5 | hsa-miR-590-3p  |
| GEMIN5 | hsa-miR-105-5p  |
| GEMIN5 | hsa-miR-5584-3p |
| GEMIN5 | hsa-miR-7212-5p |
| GEMIN5 | hsa-miR-8868    |
| GEMIN5 | hsa-miR-30--3p  |
| GEMIN5 | hsa-miR-2480    |
| GEMIN5 | hsa-miR-2284u   |
| GEMIN5 | hsa-miR-3099    |
| GEMIN5 | hsa-miR-3136-5p |
| GEMIN5 | hsa-miR-5623-5p |
| GEMIN5 | hsa-miR-7283-5p |
| GEMIN5 | hsa-miR-3084-5p |
| GEMIN5 | hsa-miR-2284ab  |
| GEMIN5 | hsa-miR-26b-3p  |
| GEMIN5 | hsa-miR-2312    |
| GEMIN5 | hsa-miR-1271-5p |
| GEMIN5 | hsa-miR-770-5p  |
| GEMIN5 | hsa-miR-666-3p  |
| GEMIN5 | hsa-miR-4279    |
| GEMIN5 | hsa-miR-2285h   |
| GEMIN5 | hsa-miR-200a-3p |
| GEMIN5 | hsa-miR-3163    |
| GEMIN5 | hsa-miR-132-3p  |
| GEMIN5 | hsa-miR-9-5p    |
| GEMIN5 | hsa-miR-217-3p  |
| GEMIN5 | hsa-miR-2284w   |
| GEMIN5 | hsa-miR-3158-5p |

|        |                   |
|--------|-------------------|
| GEMIN5 | hsa-miR-31-3p     |
| GEMIN5 | hsa-miR-7215-5p   |
| GEMIN5 | hsa-miR-3093-3p   |
| GEMIN5 | hsa-miR-5098      |
| GEMIN5 | hsa-miR-1271-5p   |
| GEMIN5 | hsa-miR-5009-3p   |
| GEMIN5 | hsa-miR-7055-3p   |
| GEMIN5 | hsa-miR-196-1-3p  |
| GEMIN5 | hsa-miR-7347-5p   |
| GEMIN5 | hsa-miR-7652-3p   |
| GEMIN5 | hsa-miR-3618-5p   |
| GEMIN5 | hsa-miR-373-3p    |
| GEMIN5 | hsa-miR-4456      |
| GEMIN5 | hsa-miR-513c-3p   |
| GEMIN5 | hsa-miR-7200-3p   |
| GEMIN5 | hsa-miR-665       |
| GEMIN5 | hsa-miR-3068-3p   |
| GEMIN5 | hsa-miR-8108      |
| GEMIN5 | hsa-miR-6074      |
| GEMIN5 | hsa-miR-7340-5p   |
| GEMIN5 | hsa-miR-490-3p    |
| GEMIN5 | hsa-miR-4316      |
| GEMIN5 | hsa-miR-2352      |
| GEMIN5 | hsa-miR-194-5p    |
| GEMIN5 | hsa-miR-1231      |
| GEMIN5 | hsa-miR-5120      |
| GEMIN5 | hsa-miR-629-3p    |
| GEMIN5 | hsa-miR-548x-3p   |
| GEMIN5 | hsa-miR-377-3p    |
| GEMIN5 | hsa-miR-2284c     |
| GEMIN5 | hsa-miR-6931-5p   |
| GEMIN5 | hsa-miR-5616-3p   |
| GEMIN5 | hsa-miR-877-3p    |
| GEMIN5 | hsa-miR-6950-5p   |
| GEMIN5 | hsa-miR-200bc-3p  |
| GEMIN5 | hsa-miR-1191a     |
| GEMIN5 | hsa-miR-149-5p    |
| GEMIN5 | hsa-miR-6906-3p   |
| GEMIN5 | hsa-miR-181a-2-3p |
| GEMIN5 | hsa-miR-3121-3p   |
| GEMIN5 | hsa-miR-505-3p    |
| GEMIN5 | hsa-miR-548ap-3p  |
| GEMIN5 | hsa-miR-2468      |
| GEMIN5 | hsa-miR-6929-5p   |
| GEMIN5 | hsa-miR-4659b-3p  |
| GEMIN5 | hsa-miR-2917      |



|        |                  |
|--------|------------------|
| GEMIN5 | hsa-miR-548at-3p |
| GEMIN5 | hsa-miR-146      |
| GEMIN5 | hsa-miR-6973b-5p |
| GEMIN5 | hsa-miR-7355-3p  |
| GEMIN5 | hsa-miR-3475-3p  |
| GEMIN5 | hsa-miR-640      |
| GEMIN5 | hsa-miR-6875-3p  |
| GEMIN5 | hsa-miR-340-5p   |
| GEMIN5 | hsa-miR-3665     |
| GEMIN5 | hsa-miR-6832-5p  |
| GEMIN5 | hsa-miR-6893-5p  |
| GEMIN5 | hsa-miR-351-5p   |
| GEMIN5 | hsa-miR-330-5p   |
| GEMIN5 | hsa-miR-433-5p   |
| GEMIN5 | hsa-miR-2370-3p  |
| GEMIN5 | hsa-miR-33-5p    |
| GEMIN5 | hsa-miR-2359     |
| GEMIN5 | hsa-miR-6945-3p  |
| GEMIN5 | hsa-miR-101-3p   |
| GEMIN5 | hsa-miR-4699-3p  |
| GEMIN5 | hsa-miR-5132-3p  |
| GEMIN5 | hsa-miR-1950     |
| GEMIN5 | hsa-miR-96-5p    |
| GEMIN5 | hsa-miR-7014-5p  |
| GEMIN5 | hsa-miR-670-5p   |
| GEMIN5 | hsa-miR-1892     |
| GEMIN5 | hsa-miR-2284m    |
| GEMIN5 | hsa-miR-181      |
| GEMIN5 | hsa-miR-4526     |
| GEMIN5 | hsa-miR-202-5p   |
| GEMIN5 | hsa-miR-449a     |
| GEMIN5 | hsa-miR-32-3p    |
| GEMIN5 | hsa-miR-504-5p   |
| GEMIN5 | hsa-miR-7202-5p  |
| GEMIN5 | hsa-miR-5586-3p  |
| GEMIN5 | hsa-miR-7-5p     |
| GEMIN5 | hsa-miR-6334     |
| GEMIN5 | hsa-miR-519e-5p  |
| GEMIN5 | hsa-miR-936      |
| GEMIN5 | hsa-miR-4296     |
| GEMIN5 | hsa-miR-362-5p   |
| GEMIN5 | hsa-miR-7440-3p  |
| GEMIN5 | hsa-miR-199-3p   |
| GEMIN5 | hsa-miR-3115     |
| GEMIN5 | hsa-miR-342-5p   |
| GEMIN5 | hsa-miR-1229-5p  |

|        |                  |
|--------|------------------|
| GEMIN5 | hsa-miR-7042-3p  |
| GEMIN5 | hsa-miR-379-5p   |
| GEMIN5 | hsa-miR-449a-3p  |
| GEMIN5 | hsa-miR-219-2-3p |
| GEMIN5 | hsa-miR-1288-5p  |
| GEMIN5 | hsa-miR-548aw    |
| GEMIN5 | hsa-miR-513c-5p  |
| GEMIN5 | hsa-miR-6972-5p  |
| GEMIN5 | hsa-miR-2909     |
| GEMIN5 | hsa-miR-124-5p   |
| GEMIN5 | hsa-miR-677-3p   |
| GEMIN5 | hsa-miR-144-3p   |
| GEMIN5 | hsa-miR-5187-3p  |
| GEMIN5 | hsa-miR-6939-5p  |
| GEMIN5 | hsa-miR-6932-3p  |
| GEMIN5 | hsa-miR-506-3p   |
| GEMIN5 | hsa-miR-3149     |
| GEMIN5 | hsa-miR-7023-3p  |
| GEMIN5 | hsa-miR-548bd-3p |
| GEMIN5 | hsa-miR-4299     |
| GEMIN5 | hsa-miR-6938-3p  |
| GEMIN5 | hsa-miR-4694-5p  |
| GEMIN5 | hsa-miR-673-5p   |
| GEMIN5 | hsa-miR-2439-5p  |
| GEMIN5 | hsa-miR-323      |
| GEMIN5 | hsa-miR-4668-5p  |
| GEMIN5 | hsa-miR-504      |
| GEMIN5 | hsa-miR-375      |
| GEMIN5 | hsa-miR-5100     |
| GEMIN5 | hsa-miR-185-3p   |
| GEMIN5 | hsa-miR-7150     |
| GEMIN5 | hsa-miR-494      |
| GEMIN5 | hsa-miR-3067-5p  |
| GEMIN5 | hsa-miR-1843-3p  |
| GEMIN5 | hsa-miR-1902     |
| GEMIN5 | hsa-miR-463-5p   |
| GEMIN5 | hsa-miR-1953     |
| GEMIN5 | hsa-miR-4661-3p  |
| GEMIN5 | hsa-miR-1250-3p  |
| GEMIN5 | hsa-miR-4659a-3p |
| GEMIN5 | hsa-miR-6964-5p  |
| GEMIN5 | hsa-miR-548h-5p  |
| GEMIN5 | hsa-miR-6520     |
| GEMIN5 | hsa-miR-2891     |
| GEMIN5 | hsa-miR-27a-5p   |
| GEMIN5 | hsa-miR-580      |

|        |                   |
|--------|-------------------|
| GEMIN5 | hsa-miR-6979-5p   |
| GEMIN5 | hsa-miR-34-5p     |
| GEMIN5 | hsa-miR-2375      |
| GEMIN5 | hsa-miR-7855-5p   |
| GEMIN5 | hsa-miR-7185-3p   |
| GEMIN5 | hsa-miR-181a-3p   |
| GEMIN5 | hsa-miR-770       |
| GEMIN5 | hsa-miR-7188-5p   |
| GEMIN5 | hsa-miR-4417      |
| GEMIN5 | hsa-miR-7320-3p   |
| GEMIN5 | hsa-miR-1668      |
| GEMIN5 | hsa-miR-194-5p    |
| GEMIN5 | hsa-miR-514b-5p   |
| GEMIN5 | hsa-miR-3552      |
| GEMIN5 | hsa-miR-2284v     |
| GEMIN5 | hsa-miR-548ar-3p  |
| GEMIN5 | hsa-miR-2454-3p   |
| GEMIN5 | hsa-miR-466       |
| GEMIN5 | hsa-miR-296-3p    |
| GEMIN5 | hsa-miR-378-5p    |
| GEMIN5 | hsa-miR-4701-3p   |
| GEMIN5 | hsa-miR-8864      |
| GEMIN5 | hsa-miR-3120-3p   |
| GEMIN5 | hsa-miR-8831      |
| GEMIN5 | hsa-miR-892a      |
| GEMIN5 | hsa-miR-1966-3p   |
| GEMIN5 | hsa-miR-421-5p    |
| GEMIN5 | hsa-miR-4275      |
| GEMIN5 | hsa-miR-548ah-3p  |
| GEMIN5 | hsa-miR-188-3p    |
| GEMIN5 | hsa-miR-9769-5p   |
| GEMIN5 | hsa-miR-6856-5p   |
| GEMIN5 | hsa-miR-6903-5p   |
| GEMIN5 | hsa-miR-4324      |
| GEMIN5 | hsa-miR-2464-3p   |
| GEMIN5 | hsa-miR-450a-2-3p |
| GEMIN5 | hsa-miR-6826-5p   |
| GEMIN5 | hsa-miR-141-3p    |
| GEMIN5 | hsa-miR-519e-3p   |
| GEMIN5 | hsa-miR-6975-5p   |
| GEMIN5 | hsa-miR-30c-1-3p  |
| GEMIN5 | hsa-miR-329       |
| GEMIN5 | hsa-miR-603       |
| GEMIN5 | hsa-miR-4427      |
| GEMIN5 | hsa-miR-7067-5p   |
| GEMIN5 | hsa-miR-8093      |

|        |                  |
|--------|------------------|
| GEMIN5 | hsa-miR-630      |
| GEMIN5 | hsa-miR-7117-5p  |
| GEMIN5 | hsa-miR-5695     |
| GEMIN5 | hsa-miR-3132     |
| GEMIN5 | hsa-miR-2486-3p  |
| GEMIN5 | hsa-miR-7227-5p  |
| GEMIN5 | hsa-miR-2284k    |
| GEMIN5 | hsa-miR-1178-5p  |
| GEMIN5 | hsa-miR-7278-5p  |
| GEMIN5 | hsa-miR-548aj-3p |
| GEMIN5 | hsa-miR-4768-3p  |
| GEMIN5 | hsa-miR-7332-3p  |
| GEMIN5 | hsa-miR-657      |
| GEMIN5 | hsa-miR-7280-3p  |
| GEMIN5 | hsa-miR-548b-3p  |
| GEMIN5 | hsa-miR-7288-5p  |
| GEMIN5 | hsa-miR-452-5p   |
| GEMIN5 | hsa-miR-134      |
| GEMIN5 | hsa-miR-627      |
| GEMIN5 | hsa-miR-4772-5p  |
| GEMIN5 | hsa-miR-7688-3p  |
| GEMIN5 | hsa-miR-513a-3p  |
| GEMIN5 | hsa-miR-606      |
| GEMIN5 | hsa-miR-6076     |
| GEMIN5 | hsa-miR-28-5p    |
| GEMIN5 | hsa-miR-6966-3p  |
| GEMIN5 | hsa-miR-2430     |
| GEMIN5 | hsa-miR-599      |
| GEMIN5 | hsa-miR-598-5p   |
| GEMIN5 | hsa-miR-7978     |
| GEMIN5 | hsa-miR-7047-3p  |
| GEMIN5 | hsa-miR-5584-5p  |
| GEMIN5 | hsa-miR-7183-3p  |
| GEMIN5 | hsa-miR-138-3p   |
| GEMIN5 | hsa-miR-2311     |
| GEMIN5 | hsa-miR-4257     |
| GEMIN5 | hsa-miR-23       |
| GEMIN5 | hsa-miR-1968-5p  |
| GEMIN5 | hsa-miR-7856-5p  |
| GEMIN5 | hsa-miR-454-5p   |
| GEMIN5 | hsa-miR-3584-5p  |
| GEMIN5 | hsa-miR-3152-3p  |
| GEMIN5 | hsa-miR-371a-5p  |
| GEMIN5 | hsa-miR-2284n    |
| GEMIN5 | hsa-miR-2136     |
| GEMIN5 | hsa-miR-344-5p   |

|        |                   |
|--------|-------------------|
| GEMIN5 | hsa-miR-2424      |
| GEMIN5 | hsa-miR-692       |
| GEMIN5 | hsa-miR-3179      |
| GEMIN5 | hsa-miR-3192-3p   |
| GEMIN5 | hsa-miR-548g-3p   |
| GEMIN5 | hsa-miR-217       |
| GEMIN5 | hsa-miR-409-3p    |
| GEMIN5 | hsa-miR-693-3p    |
| GEMIN5 | hsa-miR-181a-1-3p |
| GEMIN5 | hsa-miR-3200-5p   |
| GEMIN5 | hsa-miR-548z      |
| GEMIN5 | hsa-miR-130a-5p   |
| GEMIN5 | hsa-miR-642       |
| GEMIN5 | hsa-miR-548aq-3p  |
| GEMIN5 | hsa-miR-6898-5p   |
| GEMIN5 | hsa-miR-2315      |
| GEMIN5 | hsa-miR-8802      |
| GEMIN5 | hsa-miR-4511      |
| GEMIN5 | hsa-miR-224-3p    |
| GEMIN5 | hsa-miR-124-3p    |
| GEMIN5 | hsa-miR-107-3p    |
| GEMIN5 | hsa-miR-294-5p    |
| GEMIN5 | hsa-miR-30e       |
| GEMIN5 | hsa-miR-204-3p    |
| GEMIN5 | hsa-miR-23-3p     |
| GEMIN5 | hsa-miR-4762-3p   |
| GEMIN5 | hsa-miR-290a-5p   |
| GEMIN5 | hsa-miR-3092-5p   |
| GEMIN5 | hsa-miR-15b-3p    |
| GEMIN5 | hsa-miR-548az-3p  |
| GEMIN5 | hsa-miR-7275-3p   |
| GEMIN5 | hsa-miR-3678-3p   |
| GEMIN5 | hsa-miR-138-2-3p  |
| GEMIN5 | hsa-miR-7245-3p   |
| GEMIN5 | hsa-miR-3934-5p   |
| GEMIN5 | hsa-miR-671-5p    |
| GEMIN5 | hsa-miR-7046-3p   |
| GEMIN5 | hsa-miR-215       |
| GEMIN5 | hsa-miR-1827      |
| GEMIN5 | hsa-miR-7864      |
| GEMIN5 | hsa-miR-548t-3p   |
| GEMIN5 | hsa-miR-3121-3p   |
| GEMIN5 | hsa-miR-2415-5p   |
| GEMIN5 | hsa-miR-449-5p    |
| GEMIN5 | hsa-miR-7329-3p   |
| GEMIN5 | hsa-miR-5002-3p   |

|        |                   |
|--------|-------------------|
| GEMIN5 | hsa-miR-548       |
| GEMIN5 | hsa-miR-940       |
| GEMIN5 | hsa-miR-1685-3p   |
| GEMIN5 | hsa-miR-372-5p    |
| GEMIN5 | hsa-miR-4680-3p   |
| GEMIN5 | hsa-miR-141-5p    |
| GEMIN5 | hsa-miR-199       |
| GEMIN5 | hsa-miR-7845-5p   |
| GEMIN5 | hsa-miR-7262a-5p  |
| GEMIN5 | hsa-miR-2429      |
| GEMIN5 | hsa-miR-8081      |
| GEMIN5 | hsa-miR-548e-3p   |
| GEMIN5 | hsa-miR-378a-5p   |
| GEMIN5 | hsa-miR-3580-5p   |
| GEMIN5 | hsa-miR-7342-3p   |
| GEMIN5 | hsa-miR-633       |
| GEMIN5 | hsa-miR-8485      |
| GEMIN5 | hsa-miR-586       |
| GEMIN5 | hsa-miR-2467-3p   |
| GEMIN5 | hsa-miR-509-3-5p  |
| GEMIN5 | hsa-miR-500-5p    |
| GEMIN5 | hsa-miR-2475      |
| GEMIN5 | hsa-miR-2284y     |
| GEMIN5 | hsa-miR-6854-3p   |
| GEMIN5 | hsa-miR-200c-3p   |
| GEMIN5 | hsa-miR-548aef    |
| GEMIN5 | hsa-miR-8823      |
| GEMIN5 | hsa-miR-106       |
| GEMIN5 | hsa-miR-4509      |
| GEMIN5 | hsa-miR-34b-3p    |
| GEMIN5 | hsa-miR-2392      |
| GEMIN5 | hsa-miR-466aep-5p |
| GEMIN5 | hsa-miR-1910-3p   |
| GEMIN5 | hsa-miR-340-5p    |
| GEMIN5 | hsa-miR-2444      |
| GEMIN5 | hsa-miR-223-3p    |
| GEMIN5 | hsa-miR-379-5p    |
| GEMIN5 | hsa-miR-374-5p    |
| GEMIN5 | hsa-miR-142-5p    |
| GEMIN5 | hsa-miR-4753-5p   |
| GEMIN5 | hsa-miR-708-5p    |
| GEMIN5 | hsa-miR-7674-5p   |
| GEMIN5 | hsa-miR-148b-5p   |
| GEMIN5 | hsa-miR-548m      |
| GEMIN5 | hsa-miR-873-3p    |
| GEMIN5 | hsa-miR-4796-5p   |

|        |                   |
|--------|-------------------|
| GEMIN5 | hsa-miR-3604      |
| GEMIN5 | hsa-miR-7515      |
| GEMIN5 | hsa-miR-548au-3p  |
| GEMIN5 | hsa-miR-8100      |
| GEMIN5 | hsa-miR-4732-5p   |
| GEMIN5 | hsa-miR-410       |
| GEMIN5 | hsa-miR-622       |
| GEMIN5 | hsa-miR-125-5p    |
| GEMIN5 | hsa-miR-653       |
| GEMIN5 | hsa-miR-759       |
| GEMIN5 | hsa-miR-197-5p    |
| GEMIN5 | hsa-miR-2285n     |
| GEMIN5 | hsa-miR-653-5p    |
| GEMIN5 | hsa-miR-383-3p    |
| GEMIN5 | hsa-miR-142-3p    |
| GEMIN5 | hsa-miR-216b-3p   |
| GEMIN5 | hsa-miR-196       |
| GEMIN5 | hsa-miR-8893      |
| GEMIN5 | hsa-miR-295-5p    |
| GEMIN5 | hsa-miR-6838-3p   |
| GEMIN5 | hsa-miR-5132-5p   |
| GEMIN5 | hsa-miR-7291-3p   |
| GEMIN5 | hsa-miR-544b      |
| GEMIN5 | hsa-miR-885       |
| GEMIN5 | hsa-miR-7398q-3p  |
| GEMIN5 | hsa-miR-7347-3p   |
| GEMIN5 | hsa-miR-548as-3p  |
| GEMIN5 | hsa-miR-324-3p    |
| GEMIN5 | hsa-miR-488-3p    |
| GEMIN5 | hsa-miR-627-5p    |
| GEMIN5 | hsa-miR-3572-5p   |
| GEMIN5 | hsa-miR-548b-3p   |
| GEMIN5 | hsa-miR-181b-1-3p |
| GEMIN5 | hsa-miR-7293-5p   |
| GEMIN5 | hsa-miR-3662      |
| GEMIN5 | hsa-miR-6797-3p   |
| GEMIN5 | hsa-miR-7370-5p   |
| GEMIN5 | hsa-miR-7242-3p   |
| GEMIN5 | hsa-miR-1470      |
| GEMIN5 | hsa-miR-5192      |
| GEMIN5 | hsa-miR-497-3p    |
| GEMIN5 | hsa-miR-365-5p    |
| GEMIN5 | hsa-miR-103       |
| GEMIN5 | hsa-miR-610       |
| GEMIN5 | hsa-miR-3541      |
| GEMIN5 | hsa-miR-3167-5p   |

|        |                  |
|--------|------------------|
| GEMIN5 | hsa-miR-4318     |
| GEMIN5 | hsa-miR-548bb-3p |
| GEMIN5 | hsa-miR-519d-5p  |
| GEMIN5 | hsa-miR-3613b    |
| GEMIN5 | hsa-miR-4272     |
| GEMIN5 | hsa-miR-182-5p   |
| GEMIN5 | hsa-miR-2284a    |
| GEMIN5 | hsa-miR-8095     |
| GEMIN5 | hsa-miR-6874-3p  |
| GEMIN5 | hsa-miR-6730-3p  |
| GEMIN5 | hsa-miR-370-3p   |
| GEMIN5 | hsa-miR-134-3p   |
| GEMIN5 | hsa-miR-524-5p   |
| GEMIN5 | hsa-miR-2351     |
| GEMIN5 | hsa-miR-548a-3p  |
| GEMIN5 | hsa-miR-3090-5p  |
| GEMIN5 | hsa-miR-338-3p   |
| GEMIN5 | hsa-miR-589-5p   |
| GEMIN5 | hsa-miR-7356-3p  |
| GEMIN5 | hsa-miR-212-3p   |
| GEMIN5 | hsa-miR-107      |
| GEMIN5 | hsa-miR-103-3p   |
| GEMIN5 | hsa-miR-1982-5p  |
| GEMIN5 | hsa-miR-548d-3p  |
| GEMIN5 | hsa-miR-182-5p   |
| GEMIN5 | hsa-miR-2284-5p  |
| GEMIN5 | hsa-miR-3671     |
| GEMIN5 | hsa-miR-1279     |
| GEMIN5 | hsa-miR-493-3p   |
| GEMIN5 | hsa-miR-672-3p   |
| GEMIN5 | hsa-miR-7154-5p  |
| GEMIN5 | hsa-miR-2367-3p  |
| GEMIN5 | hsa-miR-2414     |
| GEMIN5 | hsa-miR-501-5p   |
| GEMIN5 | hsa-miR-7218-5p  |
| GEMIN5 | hsa-miR-7089-5p  |
| GEMIN5 | hsa-miR-3575     |
| GEMIN5 | hsa-miR-1207-5p  |
| GEMIN5 | hsa-miR-548d-5p  |
| GEMIN5 | hsa-miR-547-5p   |
| GEMIN5 | hsa-miR-548h-3p  |
| GEMIN5 | hsa-miR-548aa    |
| GEMIN5 | hsa-miR-2358     |
| GEMIN5 | hsa-miR-429      |
| GEMIN5 | hsa-miR-22-5p    |
| GEMIN5 | hsa-miR-383-5p.1 |



|        |                  |
|--------|------------------|
| GEMIN5 | hsa-miR-187-3p   |
| GEMIN5 | hsa-miR-6747-3p  |
| GEMIN5 | hsa-miR-141-3p   |
| GEMIN5 | hsa-miR-500      |
| GEMIN5 | hsa-miR-6947-3p  |
| GEMIN5 | hsa-miR-7257-3p  |
| GEMIN5 | hsa-miR-7078-5p  |
| GEMIN5 | hsa-miR-698-5p   |
| GEMIN5 | hsa-miR-883-5p   |
| GEMIN5 | hsa-miR-1786     |
| GEMIN5 | hsa-miR-676-3p   |
| GEMIN5 | hsa-miR-344eh-5p |
| GEMIN5 | hsa-miR-31-5p    |
| GEMIN5 | hsa-miR-1255-5p  |
| GEMIN5 | hsa-miR-6982-5p  |
| GEMIN5 | hsa-miR-181-5p   |
| GEMIN5 | hsa-miR-510-3p   |
| GEMIN5 | hsa-miR-6998-5p  |
| GEMIN5 | hsa-miR-6806-5p  |
| GEMIN5 | hsa-miR-8901     |
| GEMIN5 | hsa-miR-7684-5p  |
| GEMIN5 | hsa-miR-371b-5p  |
| GEMIN5 | hsa-miR-2284g    |
| GEMIN5 | hsa-miR-195-3p   |
| GEMIN5 | hsa-miR-3168     |
| GEMIN5 | hsa-miR-7018-3p  |
| GEMIN5 | hsa-miR-93-5p    |
| GEMIN5 | hsa-miR-7676-5p  |
| GEMIN5 | hsa-miR-511-3p   |
| GEMIN5 | hsa-miR-679-3p   |
| GEMIN5 | hsa-miR-219a-5p  |
| GEMIN5 | hsa-miR-2285af   |
| GEMIN5 | hsa-miR-4538     |
| GEMIN5 | hsa-miR-2284d    |
| GEMIN5 | hsa-miR-4453     |
| GEMIN5 | hsa-miR-937-5p   |
| GEMIN5 | hsa-miR-5004-3p  |
| GEMIN5 | hsa-miR-2370-5p  |
| GEMIN5 | hsa-miR-4667-3p  |
| GEMIN5 | hsa-miR-466f-3p  |
| GEMIN5 | hsa-miR-495-3p   |
| GEMIN5 | hsa-miR-548j-3p  |
| GEMIN5 | hsa-miR-3967     |
| GEMIN5 | hsa-miR-7859     |
| GEMIN5 | hsa-miR-702-5p   |
| GEMIN5 | hsa-miR-192-5p   |

|        |                   |
|--------|-------------------|
| GEMIN5 | hsa-miR-548cej-3p |
| GEMIN5 | hsa-miR-6511a-5p  |
| GEMIN5 | hsa-miR-9-3p      |
| GEMIN5 | hsa-miR-6881-3p   |
| GEMIN5 | hsa-miR-2398      |
| GEMIN5 | hsa-miR-4439      |
| GEMIN5 | hsa-miR-2361      |
| GEMIN5 | hsa-miR-548am-3p  |
| GEMIN5 | hsa-miR-7168-3p   |
| GEMIN5 | hsa-miR-2284aa    |
| GEMIN5 | hsa-miR-7080-5p   |
| GEMIN5 | hsa-miR-7087-5p   |
| GEMIN5 | hsa-miR-1198-5p   |
| IFIT5  | hsa-miR-3200-5p   |
| IFIT5  | hsa-miR-548c-5p   |
| IFIT5  | hsa-miR-4689      |
| IFIT5  | hsa-miR-7172-5p   |
| IFIT5  | hsa-miR-7166-3p   |
| IFIT5  | hsa-miR-556-5p    |
| IFIT5  | hsa-miR-3606-3p   |
| IFIT5  | hsa-miR-7849-3p   |
| IFIT5  | hsa-miR-8873a     |
| IFIT5  | hsa-miR-2054      |
| IFIT5  | hsa-miR-1224-5p   |
| IFIT5  | hsa-miR-361-5p    |
| IFIT5  | hsa-miR-26c       |
| IFIT5  | hsa-miR-373-3p    |
| IFIT5  | hsa-miR-518-5p    |
| IFIT5  | hsa-miR-6878-5p   |
| IFIT5  | hsa-miR-374-5p    |
| IFIT5  | hsa-miR-429       |
| IFIT5  | hsa-miR-493-3p    |
| IFIT5  | hsa-miR-4762-3p   |
| IFIT5  | hsa-miR-302a-3p   |
| IFIT5  | hsa-miR-3911      |
| IFIT5  | hsa-miR-4695-5p   |
| IFIT5  | hsa-miR-4682      |
| IFIT5  | hsa-miR-623       |
| IFIT5  | hsa-miR-548j-3p   |
| IFIT5  | hsa-miR-7298-5p   |
| IFIT5  | hsa-miR-548aef    |
| IFIT5  | hsa-miR-4732-3p   |
| IFIT5  | hsa-miR-376ab-3p  |
| IFIT5  | hsa-miR-8063      |
| IFIT5  | hsa-miR-4786-3p   |
| IFIT5  | hsa-miR-576-5p    |

|       |                  |
|-------|------------------|
| IFIT5 | hsa-miR-892a     |
| IFIT5 | hsa-miR-2439-3p  |
| IFIT5 | hsa-miR-4668-5p  |
| IFIT5 | hsa-miR-548ae-3p |
| IFIT5 | hsa-miR-7856-5p  |
| IFIT5 | hsa-miR-7207-5p  |
| IFIT5 | hsa-miR-8807     |
| IFIT5 | hsa-miR-23-3p    |
| IFIT5 | hsa-miR-548ak    |
| IFIT5 | hsa-miR-8818     |
| IFIT5 | hsa-miR-223-5p   |
| IFIT5 | hsa-miR-6801-3p  |
| IFIT5 | hsa-miR-2398     |
| IFIT5 | hsa-miR-1277-3p  |
| IFIT5 | hsa-miR-203b-3p  |
| IFIT5 | hsa-miR-513c-3p  |
| IFIT5 | hsa-miR-363-3p   |
| IFIT5 | hsa-miR-548c-3p  |
| IFIT5 | hsa-miR-1288-3p  |
| IFIT5 | hsa-miR-7347-3p  |
| IFIT5 | hsa-miR-503-3p   |
| IFIT5 | hsa-miR-7286-3p  |
| IFIT5 | hsa-miR-1434-3p  |
| IFIT5 | hsa-miR-340-3p   |
| IFIT5 | hsa-miR-137-3p   |
| IFIT5 | hsa-miR-6864-3p  |
| IFIT5 | hsa-miR-499      |
| IFIT5 | hsa-miR-7244-5p  |
| IFIT5 | hsa-miR-7864     |
| IFIT5 | hsa-miR-5196-3p  |
| IFIT5 | hsa-miR-548n     |
| IFIT5 | hsa-miR-2394     |
| IFIT5 | hsa-miR-7386b-3p |
| IFIT5 | hsa-miR-548h-3p  |
| IFIT5 | hsa-miR-876-5p   |
| IFIT5 | hsa-miR-551-5p   |
| IFIT5 | hsa-miR-590-3p   |
| IFIT5 | hsa-miR-340-5p   |
| IFIT5 | hsa-miR-6733-5p  |
| IFIT5 | hsa-miR-200bc    |
| IFIT5 | hsa-miR-8908e    |
| IFIT5 | hsa-miR-4778-3p  |
| IFIT5 | hsa-miR-2387     |
| IFIT5 | hsa-miR-3609     |
| IFIT5 | hsa-miR-150-5p   |
| IFIT5 | hsa-miR-7-5p     |

|       |                  |
|-------|------------------|
| IFIT5 | hsa-miR-345-5p   |
| IFIT5 | hsa-miR-300      |
| IFIT5 | hsa-miR-136-5p   |
| IFIT5 | hsa-miR-2284aa   |
| IFIT5 | hsa-miR-5582-3p  |
| IFIT5 | hsa-miR-8904b    |
| IFIT5 | hsa-miR-4791     |
| IFIT5 | hsa-miR-7159-3p  |
| IFIT5 | hsa-miR-3165     |
| IFIT5 | hsa-miR-1243     |
| IFIT5 | hsa-miR-371a-5p  |
| IFIT5 | hsa-miR-6790-5p  |
| IFIT5 | hsa-miR-3613b    |
| IFIT5 | hsa-miR-4731-3p  |
| IFIT5 | hsa-miR-5700     |
| IFIT5 | hsa-miR-124-5p   |
| IFIT5 | hsa-miR-302      |
| IFIT5 | hsa-miR-6858-5p  |
| IFIT5 | hsa-miR-616-5p   |
| IFIT5 | hsa-miR-6891-3p  |
| IFIT5 | hsa-miR-1250-3p  |
| IFIT5 | hsa-miR-2284n    |
| IFIT5 | hsa-miR-1277-3p  |
| IFIT5 | hsa-miR-628-5p   |
| IFIT5 | hsa-miR-31-5p    |
| IFIT5 | hsa-miR-548a-5p  |
| IFIT5 | hsa-miR-3684     |
| IFIT5 | hsa-miR-33-5p    |
| IFIT5 | hsa-miR-6876-3p  |
| IFIT5 | hsa-miR-5694     |
| IFIT5 | hsa-miR-338-5p   |
| IFIT5 | hsa-miR-3138     |
| IFIT5 | hsa-miR-410      |
| IFIT5 | hsa-miR-4269     |
| IFIT5 | hsa-miR-6788-5p  |
| IFIT5 | hsa-miR-8061     |
| IFIT5 | hsa-miR-204-5p   |
| IFIT5 | hsa-miR-1260a    |
| IFIT5 | hsa-miR-670-5p   |
| IFIT5 | hsa-miR-548ay-3p |
| IFIT5 | hsa-miR-125a-3p  |
| IFIT5 | hsa-miR-1236-3p  |
| IFIT5 | hsa-miR-619      |
| IFIT5 | hsa-miR-154-5p   |
| IFIT5 | hsa-miR-2893     |
| IFIT5 | hsa-miR-101-3p   |

|       |                   |
|-------|-------------------|
| IFIT5 | hsa-miR-548bd-3p  |
| IFIT5 | hsa-miR-3938      |
| IFIT5 | hsa-miR-3201      |
| IFIT5 | hsa-miR-4266      |
| IFIT5 | hsa-miR-335-3p    |
| IFIT5 | hsa-miR-8824      |
| IFIT5 | hsa-miR-4482-3p   |
| IFIT5 | hsa-miR-17-5p     |
| IFIT5 | hsa-miR-371b-5p   |
| IFIT5 | hsa-miR-548i      |
| IFIT5 | hsa-miR-95        |
| IFIT5 | hsa-miR-2332      |
| IFIT5 | hsa-miR-183-5p    |
| IFIT5 | hsa-miR-5584-3p   |
| IFIT5 | hsa-miR-3200-3p   |
| IFIT5 | hsa-miR-7385e-3p  |
| IFIT5 | hsa-miR-548x-3p   |
| IFIT5 | hsa-miR-872       |
| IFIT5 | hsa-miR-4259      |
| IFIT5 | hsa-miR-7398d-3p  |
| IFIT5 | hsa-miR-18        |
| IFIT5 | hsa-miR-551b-5p   |
| IFIT5 | hsa-miR-7245-3p   |
| IFIT5 | hsa-miR-2284-5p   |
| IFIT5 | hsa-miR-6779-3p   |
| IFIT5 | hsa-miR-548o-5p   |
| IFIT5 | hsa-miR-519-3p    |
| IFIT5 | hsa-miR-106       |
| IFIT5 | hsa-miR-8908-3p   |
| IFIT5 | hsa-miR-548av-5p  |
| IFIT5 | hsa-miR-17-3p     |
| IFIT5 | hsa-miR-26-5p     |
| IFIT5 | hsa-miR-7-5p      |
| IFIT5 | hsa-miR-1262-5p   |
| IFIT5 | hsa-miR-6804-5p   |
| IFIT5 | hsa-miR-2285u     |
| IFIT5 | hsa-miR-7270-5p   |
| IFIT5 | hsa-miR-3934-5p   |
| IFIT5 | hsa-miR-376a-2-5p |
| IFIT5 | hsa-miR-708-5p    |
| IFIT5 | hsa-miR-1323-5p   |
| IFIT5 | hsa-miR-664       |
| IFIT5 | hsa-miR-6512-5p   |
| IFIT5 | hsa-miR-548ab     |
| IFIT5 | hsa-miR-2406      |
| IFIT5 | hsa-miR-10b-5p    |

|       |                   |
|-------|-------------------|
| IFIT5 | hsa-miR-7334-5p   |
| IFIT5 | hsa-miR-2298      |
| IFIT5 | hsa-miR-501-5p    |
| IFIT5 | hsa-miR-603       |
| IFIT5 | hsa-miR-511       |
| IFIT5 | hsa-miR-4519      |
| IFIT5 | hsa-miR-508a      |
| IFIT5 | hsa-miR-889-5p    |
| IFIT5 | hsa-miR-548k      |
| IFIT5 | hsa-miR-2373-5p   |
| IFIT5 | hsa-miR-1252      |
| IFIT5 | hsa-miR-548t-5p   |
| IFIT5 | hsa-miR-93-5p     |
| IFIT5 | hsa-miR-195-5p    |
| IFIT5 | hsa-miR-4491      |
| IFIT5 | hsa-miR-627-3p    |
| IFIT5 | hsa-miR-4740-5p   |
| IFIT5 | hsa-miR-136-5p    |
| IFIT5 | hsa-miR-2372      |
| IFIT5 | hsa-miR-548ah-5p  |
| IFIT5 | hsa-miR-888-5p    |
| IFIT5 | hsa-miR-323a-3p   |
| IFIT5 | hsa-miR-4684-5p   |
| IFIT5 | hsa-miR-2284u     |
| IFIT5 | hsa-miR-4804-3p   |
| IFIT5 | hsa-miR-500a-5p   |
| IFIT5 | hsa-miR-125b-2-3p |
| IFIT5 | hsa-miR-6834-5p   |
| IFIT5 | hsa-miR-4662-5p   |
| IFIT5 | hsa-miR-203       |
| IFIT5 | hsa-miR-497-5p    |
| IFIT5 | hsa-miR-2285x     |
| IFIT5 | hsa-miR-330-3p.2  |
| IFIT5 | hsa-miR-8065      |
| IFIT5 | hsa-miR-4677-5p   |
| IFIT5 | hsa-miR-7398r-5p  |
| IFIT5 | hsa-miR-1323      |
| IFIT5 | hsa-miR-495-3p    |
| IFIT5 | hsa-miR-2285      |
| IFIT5 | hsa-miR-4775      |
| IFIT5 | hsa-miR-4715-5p   |
| IFIT5 | hsa-miR-3938-3p   |
| IFIT5 | hsa-miR-3604      |
| IFIT5 | hsa-miR-502-5p    |
| IFIT5 | hsa-miR-1343-3p   |
| IFIT5 | hsa-miR-3682-3p   |

|       |                  |
|-------|------------------|
| IFIT5 | hsa-miR-3616-5p  |
| IFIT5 | hsa-miR-33-3p    |
| IFIT5 | hsa-miR-3924     |
| IFIT5 | hsa-miR-7386g-3p |
| IFIT5 | hsa-miR-1243-3p  |
| IFIT5 | hsa-miR-1273h-3p |
| IFIT5 | hsa-miR-331-3p   |
| IFIT5 | hsa-miR-548a-3p  |
| IFIT5 | hsa-miR-129-2-3p |
| IFIT5 | hsa-miR-216-5p   |
| IFIT5 | hsa-miR-188-3p   |
| IFIT5 | hsa-miR-372      |
| IFIT5 | hsa-miR-7166-5p  |
| IFIT5 | hsa-miR-610      |
| IFIT5 | hsa-miR-7398s-3p |
| IFIT5 | hsa-miR-4691-3p  |
| IFIT5 | hsa-miR-629-3p   |
| IFIT5 | hsa-miR-3074-5p  |
| IFIT5 | hsa-miR-145-5p   |
| IFIT5 | hsa-miR-802      |
| IFIT5 | hsa-miR-4276     |
| IFIT5 | hsa-miR-369-3p   |
| IFIT5 | hsa-miR-567      |
| IFIT5 | hsa-miR-2482     |
| IFIT5 | hsa-miR-7262b-5p |
| IFIT5 | hsa-miR-2421     |
| IFIT5 | hsa-miR-1237-3p  |
| IFIT5 | hsa-miR-580      |
| IFIT5 | hsa-miR-4468     |
| IFIT5 | hsa-miR-7373d-3p |
| IFIT5 | hsa-miR-488-3p   |
| IFIT5 | hsa-miR-195-3p   |
| IFIT5 | hsa-miR-5006-3p  |
| IFIT5 | hsa-miR-7297-3p  |
| IFIT5 | hsa-miR-373-5p   |
| IFIT5 | hsa-miR-3129-5p  |
| IFIT5 | hsa-miR-2291     |
| IFIT5 | hsa-miR-126-5p   |
| IFIT5 | hsa-miR-3116     |
| IFIT5 | hsa-miR-6791-5p  |
| IFIT5 | hsa-miR-7192-3p  |
| IFIT5 | hsa-miR-891a-3p  |
| IFIT5 | hsa-miR-633      |
| IFIT5 | hsa-miR-323-3p   |
| IFIT5 | hsa-miR-548y     |
| IFIT5 | hsa-miR-370-5p   |

|       |                  |
|-------|------------------|
| IFIT5 | hsa-miR-448      |
| IFIT5 | hsa-miR-548e-3p  |
| IFIT5 | hsa-miR-323b-3p  |
| IFIT5 | hsa-miR-3533     |
| IFIT5 | hsa-miR-4724-3p  |
| IFIT5 | hsa-miR-105-5p   |
| IFIT5 | hsa-miR-4712-3p  |
| IFIT5 | hsa-miR-5692a    |
| IFIT5 | hsa-miR-200-3p   |
| IFIT5 | hsa-miR-583      |
| IFIT5 | hsa-miR-141-3p   |
| IFIT5 | hsa-miR-2293     |
| IFIT5 | hsa-miR-4768-3p  |
| IFIT5 | hsa-miR-204-5p   |
| IFIT5 | hsa-miR-4418     |
| IFIT5 | hsa-miR-1237-3p  |
| IFIT5 | hsa-miR-548az-5p |
| IFIT5 | hsa-miR-3065-5p  |
| IFIT5 | hsa-miR-548ar-5p |
| IFIT5 | hsa-miR-8900     |
| IFIT5 | hsa-miR-513a-3p  |
| IFIT5 | hsa-miR-3915     |
| IFIT5 | hsa-miR-96-5p    |
| IFIT5 | hsa-miR-1236-3p  |
| IFIT5 | hsa-miR-5583-5p  |
| IFIT5 | hsa-miR-589-5p   |
| IFIT5 | hsa-miR-196-3p   |
| IFIT5 | hsa-miR-449a-3p  |
| IFIT5 | hsa-miR-8808     |
| IFIT5 | hsa-miR-222-3p   |
| IFIT5 | hsa-miR-8843     |
| IFIT5 | hsa-miR-16-5p    |
| IFIT5 | hsa-miR-7338-3p  |
| IFIT5 | hsa-miR-2284k    |
| IFIT5 | hsa-miR-7844-5p  |
| IFIT5 | hsa-miR-944      |
| IFIT5 | hsa-miR-503-5p   |
| IFIT5 | hsa-miR-3159     |
| IFIT5 | hsa-miR-22-5p    |
| IFIT5 | hsa-miR-4311     |
| IFIT5 | hsa-miR-8870     |
| IFIT5 | hsa-miR-4529-5p  |
| IFIT5 | hsa-miR-875-3p   |
| IFIT5 | hsa-miR-494      |
| IFIT5 | hsa-miR-5009-3p  |
| IFIT5 | hsa-miR-1233-3p  |



|       |                  |
|-------|------------------|
| IFIT5 | hsa-miR-934-5p   |
| IFIT5 | hsa-miR-424-5p   |
| IFIT5 | hsa-miR-374a-5p  |
| IFIT5 | hsa-miR-6758-3p  |
| IFIT5 | hsa-miR-216      |
| IFIT5 | hsa-miR-5096     |
| IFIT5 | hsa-miR-647      |
| IFIT5 | hsa-miR-8084     |
| IFIT5 | hsa-miR-3130-3p  |
| IFIT5 | hsa-miR-422      |
| IFIT5 | hsa-miR-548ad-5p |
| IFIT5 | hsa-miR-8083     |
| IFIT5 | hsa-miR-4766-5p  |
| IFIT5 | hsa-miR-5579-5p  |
| IFIT5 | hsa-miR-587      |
| IFIT5 | hsa-miR-885-5p   |
| IFIT5 | hsa-miR-510-3p   |
| IFIT5 | hsa-miR-4717-3p  |
| IFIT5 | hsa-miR-4517     |
| IFIT5 | hsa-miR-653      |
| IFIT5 | hsa-miR-5580-3p  |
| IFIT5 | hsa-miR-548w     |
| IFIT5 | hsa-miR-7370i-3p |
| IFIT5 | hsa-miR-496.1    |
| IFIT5 | hsa-miR-345-3p   |
| IFIT5 | hsa-miR-552-5p   |
| IFIT5 | hsa-miR-7371e-3p |
| IFIT5 | hsa-miR-934      |
| IFIT5 | hsa-miR-3658     |
| IFIT5 | hsa-miR-7152-5p  |
| IFIT5 | hsa-miR-8908b    |
| IFIT5 | hsa-miR-323      |
| IFIT5 | hsa-miR-7193-5p  |
| IFIT5 | hsa-miR-2418     |
| IFIT5 | hsa-miR-8884     |
| IFIT5 | hsa-miR-1304-5p  |
| IFIT5 | hsa-miR-3187-3p  |
| IFIT5 | hsa-miR-7374a-3p |
| IFIT5 | hsa-miR-496      |
| IFIT5 | hsa-miR-548g-5p  |
| IFIT5 | hsa-miR-2285s    |
| IFIT5 | hsa-miR-1200     |
| IFIT5 | hsa-miR-2357     |
| IFIT5 | hsa-miR-6079     |
| IFIT5 | hsa-miR-7168-5p  |
| IFIT5 | hsa-miR-5011-5p  |

|       |                  |
|-------|------------------|
| IFIT5 | hsa-miR-6856-3p  |
| IFIT5 | hsa-miR-211-5p   |
| IFIT5 | hsa-miR-2284j    |
| IFIT5 | hsa-miR-2284d    |
| IFIT5 | hsa-miR-3667-3p  |
| IFIT5 | hsa-miR-4711-3p  |
| IFIT5 | hsa-miR-888-5p   |
| IFIT5 | hsa-miR-433      |
| IFIT5 | hsa-miR-3182     |
| IFIT5 | hsa-miR-557      |
| IFIT5 | hsa-miR-7398t-3p |
| IFIT5 | hsa-miR-6894-5p  |
| IFIT5 | hsa-miR-6772-5p  |
| IFIT5 | hsa-miR-507      |
| IFIT5 | hsa-miR-3120-5p  |
| IFIT5 | hsa-miR-8895     |
| IFIT5 | hsa-miR-8865     |
| IFIT5 | hsa-miR-3153     |
| IFIT5 | hsa-miR-7194-5p  |
| IFIT5 | hsa-miR-421      |
| IFIT5 | hsa-miR-23       |
| IFIT5 | hsa-miR-4646-5p  |
| IFIT5 | hsa-miR-29a-5p   |
| IFIT5 | hsa-miR-125      |
| IFIT5 | hsa-miR-138-3p   |
| IFIT5 | hsa-miR-200b-3p  |
| IFIT5 | hsa-miR-6529-5p  |
| IFIT5 | hsa-miR-548z     |
| IFIT5 | hsa-miR-2284a    |
| IFIT5 | hsa-miR-382-3p   |
| IFIT5 | hsa-miR-2284c    |
| IFIT5 | hsa-miR-9-3p     |
| IFIT5 | hsa-miR-670      |
| IFIT5 | hsa-miR-30-5p    |
| IFIT5 | hsa-miR-429-3p   |
| IFIT5 | hsa-miR-764      |
| IFIT5 | hsa-miR-3923     |
| IFIT5 | hsa-miR-1285-5p  |
| IFIT5 | hsa-miR-30c-2-3p |
| IFIT5 | hsa-miR-369-3p   |
| IFIT5 | hsa-miR-2352     |
| IFIT5 | hsa-miR-7333-5p  |
| IFIT5 | hsa-miR-2284z    |
| IFIT5 | hsa-miR-1303     |
| IFIT5 | hsa-miR-374      |
| IFIT5 | hsa-miR-876      |

|       |                  |
|-------|------------------|
| IFIT5 | hsa-miR-4515     |
| IFIT5 | hsa-miR-486-5p   |
| IFIT5 | hsa-miR-150-3p   |
| IFIT5 | hsa-miR-433-3p   |
| IFIT5 | hsa-miR-132-3p   |
| IFIT5 | hsa-miR-2284g    |
| IFIT5 | hsa-miR-7154-3p  |
| IFIT5 | hsa-miR-4528     |
| IFIT5 | hsa-miR-299-3p   |
| IFIT5 | hsa-miR-6852-5p  |
| IFIT5 | hsa-miR-4692     |
| IFIT5 | hsa-miR-3680-3p  |
| IFIT5 | hsa-miR-6739-5p  |
| IFIT5 | hsa-miR-183-3p   |
| IFIT5 | hsa-miR-3672     |
| IFIT5 | hsa-miR-1287-3p  |
| IFIT5 | hsa-miR-2369     |
| IFIT5 | hsa-miR-7386j-3p |
| IFIT5 | hsa-miR-2284b    |
| IFIT5 | hsa-miR-30-3p    |
| IFIT5 | hsa-miR-15a-3p   |
| IFIT5 | hsa-miR-3145-3p  |
| IFIT5 | hsa-miR-4687-5p  |
| IFIT5 | hsa-miR-5703     |
| IFIT5 | hsa-miR-7312-5p  |
| IFIT5 | hsa-miR-373-3p   |
| IFIT5 | hsa-miR-224-5p   |
| IFIT5 | hsa-miR-3150a-3p |
| IFIT5 | hsa-miR-4803     |
| IFIT5 | hsa-miR-331-3p   |
| IFIT5 | hsa-miR-3179     |
| IFIT5 | hsa-miR-186-5p   |
| IFIT5 | hsa-miR-7257-3p  |
| IFIT5 | hsa-miR-1912     |
| IFIT5 | hsa-let-7-5p     |
| IFIT5 | hsa-miR-4764-3p  |
| IFIT5 | hsa-miR-105b     |
| IFIT5 | hsa-miR-375      |
| IFIT5 | hsa-miR-664a-3p  |
| IFIT5 | hsa-miR-548am-3p |
| IFIT5 | hsa-miR-302-3p   |
| IFIT5 | hsa-miR-1322     |
| IFIT5 | hsa-miR-383-5p.2 |
| IFIT5 | hsa-miR-559      |
| IFIT5 | hsa-miR-655      |
| IFIT5 | hsa-miR-7394b-5p |

|       |                  |
|-------|------------------|
| IFIT5 | hsa-miR-4742-5p  |
| IFIT5 | hsa-miR-509-3-5p |
| IFIT5 | hsa-miR-631      |
| IFIT5 | hsa-miR-3200-3p  |
| IFIT5 | hsa-miR-154a     |
| IFIT5 | hsa-miR-30c-3p   |
| IFIT5 | hsa-miR-539-5p   |
| IFIT5 | hsa-miR-146a-3p  |
| IFIT5 | hsa-miR-6830-5p  |
| IFIT5 | hsa-miR-548ar-3p |
| IFIT5 | hsa-miR-6072     |
| IFIT5 | hsa-miR-8838     |
| IFIT5 | hsa-miR-526      |
| IFIT5 | hsa-miR-148      |
| IFIT5 | hsa-miR-1-5p     |
| IFIT5 | hsa-miR-10a-3p   |
| IFIT5 | hsa-miR-3925-5p  |
| IFIT5 | hsa-miR-19-5p    |
| IFIT5 | hsa-miR-4760-5p  |
| IFIT5 | hsa-miR-28-5p    |
| IFIT5 | hsa-miR-2466-5p  |
| IFIT5 | hsa-miR-2452     |
| IFIT5 | hsa-miR-502-5p   |
| IFIT5 | hsa-miR-7371b-3p |
| IFIT5 | hsa-miR-548aj-3p |
| IFIT5 | hsa-miR-215      |
| IFIT5 | hsa-miR-2404     |
| IFIT5 | hsa-miR-582-5p   |
| IFIT5 | hsa-miR-135-5p   |
| IFIT5 | hsa-miR-4533     |
| IFIT5 | hsa-miR-6074     |
| IFIT5 | hsa-miR-548e-5p  |
| IFIT5 | hsa-miR-6809-5p  |
| IFIT5 | hsa-miR-142-3p   |
| IFIT5 | hsa-miR-7199-5p  |
| IFIT5 | hsa-miR-7173-3p  |
| IFIT5 | hsa-miR-506-5p   |
| IFIT5 | hsa-miR-6128     |
| IFIT5 | hsa-miR-4434     |
| IFIT5 | hsa-miR-7386e-3p |
| IFIT5 | hsa-miR-7264-3p  |
| IFIT5 | hsa-miR-21-3p    |
| IFIT5 | hsa-miR-222-5p   |
| IFIT5 | hsa-miR-548az-3p |
| IFIT5 | hsa-miR-3662     |
| IFIT5 | hsa-miR-20       |

|       |                  |
|-------|------------------|
| IFIT5 | hsa-miR-7281-3p  |
| IFIT5 | hsa-miR-153      |
| IFIT5 | hsa-miR-10b-3p   |
| IFIT5 | hsa-miR-367-3p   |
| IFIT5 | hsa-miR-6509-5p  |
| IFIT5 | hsa-miR-3163     |
| IFIT5 | hsa-miR-513c-5p  |
| IFIT5 | hsa-miR-758-3p   |
| IFIT5 | hsa-miR-892-5p   |
| IFIT5 | hsa-miR-8852     |
| IFIT5 | hsa-miR-548bb-3p |
| IFIT5 | hsa-miR-6509-3p  |
| IFIT5 | hsa-miR-4286     |
| IFIT5 | hsa-miR-1246     |
| IFIT5 | hsa-miR-6833-5p  |
| IFIT5 | hsa-miR-7324-3p  |
| IFIT5 | hsa-miR-7109-3p  |
| IFIT5 | hsa-miR-548j-5p  |
| IFIT5 | hsa-miR-7387-3p  |
| IFIT5 | hsa-miR-939-3p   |
| IFIT5 | hsa-miR-9a-3p    |
| IFIT5 | hsa-miR-4678     |
| IFIT5 | hsa-miR-3140-3p  |
| IFIT5 | hsa-miR-577      |
| IFIT5 | hsa-miR-548h-5p  |
| IFIT5 | hsa-miR-624-3p   |
| IFIT5 | hsa-miR-6742-3p  |
| IFIT5 | hsa-miR-6077     |
| IFIT5 | hsa-miR-625-3p   |
| IFIT5 | hsa-miR-4999-5p  |
| IFIT5 | hsa-miR-186-3p   |
| IFIT5 | hsa-miR-6734-5p  |
| IFIT5 | hsa-miR-4273     |
| IFIT5 | hsa-miR-7371d-5p |
| IFIT5 | hsa-miR-34       |
| IFIT5 | hsa-miR-139-5p   |
| IFIT5 | hsa-miR-877-3p   |
| IFIT5 | hsa-miR-143-3p   |
| IFIT5 | hsa-miR-7195-3p  |
| IFIT5 | hsa-miR-8066     |
| IFIT5 | hsa-miR-4693-5p  |
| IFIT5 | hsa-miR-4761-5p  |
| IFIT5 | hsa-miR-4443     |
| IFIT5 | hsa-miR-7199-3p  |
| IFIT5 | hsa-miR-6506-5p  |
| IFIT5 | hsa-miR-2110     |

|       |                   |
|-------|-------------------|
| IFIT5 | hsa-miR-586       |
| IFIT5 | hsa-miR-548aq-5p  |
| IFIT5 | hsa-miR-5682      |
| IFIT5 | hsa-miR-4536-5p   |
| IFIT5 | hsa-miR-298       |
| IFIT5 | hsa-miR-3180-3p   |
| IFIT5 | hsa-miR-204-3p    |
| IFIT5 | hsa-miR-7398r-3p  |
| IFIT5 | hsa-miR-105-5p    |
| IFIT5 | hsa-miR-148-3p    |
| IFIT5 | hsa-miR-197-3p    |
| IFIT5 | hsa-miR-129-5p    |
| IFIT5 | hsa-miR-8881      |
| IFIT5 | hsa-miR-532-3p    |
| IFIT5 | hsa-miR-378-3p    |
| IFIT5 | hsa-miR-1226-5p   |
| IFIT5 | hsa-miR-5197-5p   |
| IFIT5 | hsa-miR-6730-5p   |
| IFIT5 | hsa-miR-4650      |
| IFIT5 | hsa-miR-8054      |
| IFIT5 | hsa-miR-4699-3p   |
| IFIT5 | hsa-miR-6715a-3p  |
| IFIT5 | hsa-miR-192-3p    |
| IFIT5 | hsa-miR-372-3p    |
| IFIT5 | hsa-miR-380       |
| IFIT5 | hsa-miR-573       |
| IFIT5 | hsa-miR-4455      |
| IFIT5 | hsa-miR-5000-3p   |
| IFIT5 | hsa-miR-3675-5p   |
| IFIT5 | hsa-miR-200c-3p   |
| IFIT5 | hsa-miR-3660      |
| IFIT5 | hsa-miR-425-5p    |
| IFIT5 | hsa-miR-7349-3p   |
| IFIT5 | hsa-miR-2116-5p   |
| IFIT5 | hsa-miR-302c-3p.2 |
| IFIT5 | hsa-miR-27-3p     |
| IFIT5 | hsa-miR-95-5p     |
| IFIT5 | hsa-miR-376c-3p   |
| IFIT5 | hsa-miR-5697-3p   |
| IFIT5 | hsa-miR-654-3p    |
| IFIT5 | hsa-miR-3928-3p   |
| IFIT5 | hsa-miR-543       |
| IFIT5 | hsa-miR-3912-5p   |
| IFIT5 | hsa-miR-1193      |
| IFIT5 | hsa-miR-374a-3p   |
| IFIT5 | hsa-miR-4670-3p   |

|       |                  |
|-------|------------------|
| IFIT5 | hsa-miR-892b     |
| IFIT5 | hsa-miR-589-3p   |
| IFIT5 | hsa-miR-217      |
| IFIT5 | hsa-miR-520-3p   |
| IFIT5 | hsa-miR-6757-3p  |
| IFIT5 | hsa-miR-221-3p   |
| IFIT5 | hsa-miR-1276     |
| IFIT5 | hsa-miR-153-5p   |
| IFIT5 | hsa-miR-342-5p   |
| IFIT5 | hsa-miR-8085     |
| IFIT5 | hsa-miR-7247-5p  |
| IFIT5 | hsa-miR-3156-5p  |
| IFIT5 | hsa-miR-548ah-3p |
| IFIT5 | hsa-miR-4317     |
| IFIT5 | hsa-miR-3646     |
| IFIT5 | hsa-miR-214-3p   |
| IFIT5 | hsa-miR-32-3p    |
| IFIT5 | hsa-miR-7289-5p  |
| IFIT5 | hsa-miR-4260     |
| IFIT5 | hsa-miR-224-5p   |
| IFIT5 | hsa-miR-4795-3p  |
| IFIT5 | hsa-miR-6515-5p  |
| IFIT5 | hsa-miR-4282     |
| IFIT5 | hsa-miR-548d-3p  |
| IFIT5 | hsa-miR-142-5p   |
| IFIT5 | hsa-miR-2284y    |
| IFIT5 | hsa-miR-8874     |
| IFIT5 | hsa-miR-29a-3p   |
| IFIT5 | hsa-miR-374b-3p  |
| IFIT5 | hsa-miR-3115     |
| IFIT5 | hsa-miR-1972     |
| IFIT5 | hsa-miR-7177-5p  |
| IFIT5 | hsa-miR-4753-5p  |
| IFIT5 | hsa-miR-7398m-3p |
| IFIT5 | hsa-miR-376c-5p  |
| IFIT5 | hsa-miR-590-5p   |
| IFIT5 | hsa-miR-509-5p   |
| IFIT5 | hsa-miR-7273-5p  |
| IFIT5 | hsa-miR-520g-3p  |
| IFIT5 | hsa-miR-7201-5p  |
| IFIT5 | hsa-miR-765      |
| IFIT5 | hsa-miR-8823     |
| IFIT5 | hsa-miR-1295b-5p |
| IFIT5 | hsa-miR-2286     |
| IFIT5 | hsa-miR-410-3p   |
| IFIT5 | hsa-miR-4713-5p  |

|       |                  |
|-------|------------------|
| IFIT5 | hsa-miR-299-5p   |
| IFIT5 | hsa-miR-6516     |
| IFIT5 | hsa-miR-2429     |
| IFIT5 | hsa-miR-6082     |
| IFIT5 | hsa-miR-4318     |
| IFIT5 | hsa-miR-6846-3p  |
| IFIT5 | hsa-miR-450b     |
| IFIT5 | hsa-miR-548ap-5p |
| IFIT5 | hsa-miR-449c-3p  |
| IFIT5 | hsa-miR-3607-3p  |
| IFIT5 | hsa-miR-1289     |
| IFIT5 | hsa-miR-548d-5p  |
| IFIT5 | hsa-miR-7398g-3p |
| IFIT5 | hsa-miR-6083     |
| IFIT5 | hsa-miR-2483-3p  |
| IFIT5 | hsa-miR-2284l    |
| IFIT5 | hsa-miR-216b     |
| IFIT5 | hsa-miR-4729     |
| IFIT5 | hsa-miR-3680-5p  |
| IFIT5 | hsa-miR-137      |
| IFIT5 | hsa-miR-27a-5p   |
| IFIT5 | hsa-miR-4480     |
| IFIT5 | hsa-miR-107-3p   |
| IFIT5 | hsa-miR-511-5p   |
| IFIT5 | hsa-miR-4801     |
| IFIT5 | hsa-miR-34c-3p   |
| IFIT5 | hsa-miR-7170-5p  |
| IFIT5 | hsa-miR-8902     |
| IFIT5 | hsa-miR-7371j-5p |
| IFIT5 | hsa-miR-27b-5p   |
| IFIT5 | hsa-miR-599-3p   |
| IFIT5 | hsa-miR-6778-5p  |
| IFIT5 | hsa-miR-144-3p   |
| IFIT5 | hsa-miR-7156-5p  |
| IFIT5 | hsa-miR-612      |
| IFIT5 | hsa-miR-4670-5p  |
| IFIT5 | hsa-miR-7178-3p  |
| IFIT5 | hsa-miR-2447     |
| IFIT5 | hsa-miR-4531     |
| IFIT5 | hsa-miR-2446     |
| IFIT5 | hsa-miR-1266     |
| IFIT5 | hsa-miR-604      |
| IFIT5 | hsa-miR-548at-3p |
| IFIT5 | hsa-miR-548ay-5p |
| IFIT5 | hsa-miR-365-5p   |
| IFIT5 | hsa-miR-7351-3p  |



|       |                   |
|-------|-------------------|
| IFIT5 | hsa-miR-450a-2-3p |
| IFIT5 | hsa-miR-2116-3p   |
| IFIT5 | hsa-miR-488-3p    |
| IFIT5 | hsa-miR-1537-5p   |
| IFIT5 | hsa-miR-8821      |
| IFIT5 | hsa-miR-580-3p    |
| IFIT5 | hsa-miR-4279      |
| IFIT5 | hsa-miR-130a-5p   |
| IFIT5 | hsa-miR-3129-3p   |
| IFIT5 | hsa-miR-2320-5p   |
| IFIT5 | hsa-miR-483-3p.1  |
| IFIT5 | hsa-miR-3690      |
| IFIT5 | hsa-miR-154-5p    |
| IFIT5 | hsa-miR-3169      |
| IFIT5 | hsa-miR-93-5p     |
| IFIT5 | hsa-miR-3692-3p   |
| IFIT5 | hsa-miR-3167-3p   |
| IFIT5 | hsa-miR-297       |
| IFIT5 | hsa-miR-340-5p    |
| IFIT5 | hsa-miR-152       |
| IFIT5 | hsa-miR-3678-3p   |
| IFIT5 | hsa-miR-455-3p    |
| IFIT5 | hsa-miR-548aq-3p  |
| IFIT5 | hsa-miR-3167-5p   |
| IFIT5 | hsa-miR-4272      |
| IFIT5 | hsa-miR-2284v     |
| IFIT5 | hsa-miR-4292      |
| IFIT5 | hsa-miR-7360-5p   |
| IFIT5 | hsa-miR-216a-5p   |
| IFIT5 | hsa-miR-4650-5p   |
| IFIT5 | hsa-miR-16-3p     |
| IFIT5 | hsa-miR-491-5p    |
| IFIT5 | hsa-miR-626       |
| IFIT5 | hsa-miR-548bb-5p  |
| IFIT5 | hsa-miR-450b-5p   |
| IFIT5 | hsa-miR-125-5p    |
| IFIT5 | hsa-miR-299       |
| IFIT5 | hsa-miR-6739-3p   |
| IFIT5 | hsa-miR-4716-5p   |
| IFIT5 | hsa-miR-761       |
| IFIT5 | hsa-miR-4536-5p   |
| IFIT5 | hsa-miR-152-3p    |
| IFIT5 | hsa-miR-4475      |
| IFIT5 | hsa-miR-16-2-3p   |
| IFIT5 | hsa-miR-7386l-3p  |
| IFIT5 | hsa-let-7-3p      |

|       |                  |
|-------|------------------|
| IFIT5 | hsa-miR-1299     |
| IFIT5 | hsa-miR-7385d-3p |
| IFIT5 | hsa-miR-570-3p   |
| IFIT5 | hsa-miR-561-3p   |
| IFIT5 | hsa-miR-1842     |
| IFIT5 | hsa-miR-7293-5p  |
| IFIT5 | hsa-miR-376ab    |
| IFIT5 | hsa-miR-1277-5p  |
| IFIT5 | hsa-miR-24-3p    |
| IFIT5 | hsa-miR-503-5p   |
| IFIT5 | hsa-miR-2471-5p  |
| IFIT5 | hsa-miR-376a-5p  |
| IFIT5 | hsa-miR-2485     |
| IFIT5 | hsa-miR-548ac    |
| IFIT5 | hsa-miR-2278     |
| IFIT5 | hsa-miR-520      |
| IFIT5 | hsa-miR-7515     |
| IFIT5 | hsa-miR-380-3p   |
| IFIT5 | hsa-miR-548am-5p |
| IFIT5 | hsa-miR-5681a    |
| IFIT5 | hsa-miR-301-5p   |
| IFIT5 | hsa-miR-532-5p   |
| IFIT5 | hsa-miR-6813-3p  |
| IFIT5 | hsa-miR-1266-5p  |
| IFIT5 | hsa-miR-6800-5p  |
| IFIT5 | hsa-miR-711      |
| IFIT5 | hsa-miR-6810-3p  |
| IFIT5 | hsa-miR-150-5p   |
| IFIT5 | hsa-miR-4760-3p  |
| IFIT5 | hsa-miR-661      |
| IFIT5 | hsa-miR-378a-5p  |
| IFIT5 | hsa-miR-302f     |
| IFIT5 | hsa-miR-2311     |
| IFIT5 | hsa-miR-103-3p   |
| IFIT5 | hsa-miR-5692bc   |
| IFIT5 | hsa-miR-101-3p.2 |
| IFIT5 | hsa-miR-2114-5p  |
| IFIT5 | hsa-miR-4446-5p  |
| IFIT5 | hsa-miR-376b-5p  |
| IFIT5 | hsa-miR-4789-3p  |
| IFIT5 | hsa-miR-29a-3p   |
| IFIT5 | hsa-miR-374b-5p  |
| IFIT5 | hsa-miR-539-5p   |
| IFIT5 | hsa-miR-4720-3p  |
| IFIT5 | hsa-miR-4755-5p  |
| IFIT5 | hsa-miR-766-5p   |

|       |                  |
|-------|------------------|
| IFIT5 | hsa-miR-190a-3p  |
| IFIT5 | hsa-miR-4756-3p  |
| IFIT5 | hsa-miR-15-5p    |
| IFIT5 | hsa-miR-7398s-5p |
| IFIT5 | hsa-miR-548as-5p |
| IFIT5 | hsa-miR-1185-5p  |
| IFIT5 | hsa-miR-6872-3p  |
| IFIT5 | hsa-miR-200c-3p  |
| IFIT5 | hsa-miR-5584-5p  |
| IFIT5 | hsa-miR-302bd    |
| IFIT5 | hsa-miR-526b-5p  |
| IFIT5 | hsa-miR-5088-3p  |
| IFIT5 | hsa-miR-520gh    |
| IFIT5 | hsa-miR-145-3p   |
| IFIT5 | hsa-miR-512-3p   |
| IFIT5 | hsa-miR-4518     |
| IFIT5 | hsa-miR-6864-5p  |
| IFIT5 | hsa-miR-326      |
| IFIT5 | hsa-miR-7206-5p  |
| IFIT5 | hsa-miR-8069     |
| IFIT5 | hsa-miR-133      |
| IFIT5 | hsa-miR-7246-3p  |
| IFIT5 | hsa-miR-8802     |
| IFIT5 | hsa-miR-378      |
| IFIT5 | hsa-miR-7180-3p  |
| IFIT5 | hsa-miR-6507-3p  |
| IFIT5 | hsa-miR-6884-3p  |
| IFIT5 | hsa-miR-873-3p   |
| IFIT5 | hsa-miR-3120-3p  |
| IFIT5 | hsa-miR-7252-5p  |
| IFIT5 | hsa-miR-7260-3p  |
| IFIT5 | hsa-miR-3688-5p  |
| IFIT5 | hsa-miR-577-5p   |
| IFIT5 | hsa-miR-106-5p   |
| IFIT5 | hsa-miR-7197-3p  |
| IFIT5 | hsa-miR-548c-3p  |
| IFIT5 | hsa-miR-708-5p   |
| IFIT5 | hsa-miR-6854-3p  |
| IFIT5 | hsa-miR-376-3p   |
| IFIT5 | hsa-miR-2437     |
| IFIT5 | hsa-miR-4254     |
| IFIT5 | hsa-miR-548b-5p  |
| IFIT5 | hsa-miR-548au-5p |
| IFIT5 | hsa-miR-2370-5p  |
| IFIT5 | hsa-miR-208-5p   |
| IFIT5 | hsa-miR-129-5p   |

|       |                  |
|-------|------------------|
| IFIT5 | hsa-miR-5003-3p  |
| IFIT5 | hsa-miR-3162-5p  |
| IFIT5 | hsa-miR-7398b-3p |
| IFIT5 | hsa-miR-1251-3p  |
| IFIT5 | hsa-miR-7337-3p  |
| IFIT5 | hsa-miR-449b-3p  |
| IFIT5 | hsa-miR-585-5p   |
| IFIT5 | hsa-miR-8863     |
| IFIT5 | hsa-miR-3127-3p  |
| IFIT5 | hsa-miR-510-5p   |
| IFIT5 | hsa-miR-4777-5p  |
| IFIT5 | hsa-miR-4718     |
| IFIT5 | hsa-miR-2440     |
| IFIT5 | hsa-miR-1252-5p  |
| IFIT5 | hsa-miR-185-5p   |
| IFIT5 | hsa-miR-331-5p   |
| IFIT5 | hsa-miR-3123     |
| IFIT5 | hsa-miR-1269a    |
| IFIT5 | hsa-miR-6715b-5p |
| IFIT5 | hsa-miR-4735-5p  |
| IFIT5 | hsa-miR-651-5p   |
| IFIT5 | hsa-miR-3664-3p  |
| IFIT5 | hsa-miR-3150b-3p |
| IFIT5 | hsa-miR-5572     |
| IFIT5 | hsa-miR-619-5p   |
| IFIT5 | hsa-miR-7374b-3p |
| IFIT5 | hsa-miR-651      |
| IFIT5 | hsa-miR-7398l-3p |
| IFIT5 | hsa-miR-483-3p   |
| IFIT5 | hsa-miR-3202     |
| IFIT5 | hsa-miR-505-5p   |
| IFIT5 | hsa-miR-382-5p   |
| IFIT5 | hsa-miR-8867     |
| IFIT5 | hsa-miR-6768-3p  |
| IFIT5 | hsa-miR-618      |
| IFIT5 | hsa-miR-216a     |
| IFIT5 | hsa-miR-6756-3p  |
| IFIT5 | hsa-miR-5680     |
| IFIT5 | hsa-miR-6881-3p  |
| IFIT5 | hsa-miR-8815     |
| IFIT5 | hsa-miR-1248     |
| IFIT5 | hsa-miR-1233-5p  |
| IFIT5 | hsa-miR-6810-5p  |
| IFIT5 | hsa-miR-6735-3p  |
| IFIT5 | hsa-miR-484      |
| IFIT5 | hsa-miR-562      |

|       |                   |
|-------|-------------------|
| IFIT5 | hsa-miR-6830-3p   |
| IFIT5 | hsa-miR-3613-3p   |
| IFIT5 | hsa-miR-5696      |
| IFIT5 | hsa-miR-7859      |
| IFIT5 | hsa-miR-885       |
| IFIT5 | hsa-miR-3686      |
| IFIT5 | hsa-miR-3148      |
| IFIT5 | hsa-miR-504       |
| IFIT5 | hsa-miR-512       |
| IFIT5 | hsa-miR-199-3p    |
| IFIT5 | hsa-miR-182-5p    |
| IFIT5 | hsa-miR-362-5p    |
| IFIT5 | hsa-miR-4516      |
| IFIT5 | hsa-miR-4307      |
| IFIT5 | hsa-miR-1263      |
| IFIT5 | hsa-miR-383       |
| IFIT5 | hsa-miR-677       |
| IFIT5 | hsa-miR-7304-3p   |
| IFIT5 | hsa-miR-190-3p    |
| IFIT5 | hsa-miR-203a-3p.1 |
| IFIT5 | hsa-miR-2052      |
| IFIT5 | hsa-miR-518-3p    |
| IFIT5 | hsa-miR-4773      |
| IFIT5 | hsa-miR-609       |
| IFIT5 | hsa-miR-33        |
| IFIT5 | hsa-miR-514b-5p   |
| IFIT5 | hsa-miR-211-5p    |
| IFIT5 | hsa-miR-7363-5p   |
| IFIT5 | hsa-miR-6802-5p   |
| IFIT5 | hsa-miR-7264-5p   |
| IFIT5 | hsa-miR-7169-5p   |
| IFIT5 | hsa-miR-548l      |
| IFIT5 | hsa-miR-936       |
| IFIT5 | hsa-miR-561-5p    |
| IFIT5 | hsa-miR-1254      |
| IFIT5 | hsa-miR-4450      |
| IFIT5 | hsa-miR-516b      |
| IFIT5 | hsa-miR-2285j     |
| IFIT5 | hsa-miR-7976      |
| IFIT5 | hsa-miR-2371      |
| IFIT5 | hsa-miR-548ae-5p  |
| IFIT5 | hsa-miR-5583-3p   |
| IFIT5 | hsa-miR-6875-3p   |
| IFIT5 | hsa-miR-519       |
| IFIT5 | hsa-miR-1288      |
| IFIT5 | hsa-miR-660-5p    |

|       |                   |
|-------|-------------------|
| IFIT5 | hsa-miR-6762-3p   |
| IFIT5 | hsa-miR-6857-5p   |
| IFIT5 | hsa-miR-655-3p    |
| IFIT5 | hsa-miR-7385f-3p  |
| IFIT5 | hsa-miR-192-5p    |
| IFIT5 | hsa-miR-4796-3p   |
| IFIT5 | hsa-miR-138-2-3p  |
| IFIT5 | hsa-miR-2284m     |
| IFIT5 | hsa-miR-4779      |
| IFIT5 | hsa-miR-7845-5p   |
| IFIT5 | hsa-miR-579-3p    |
| IFIT5 | hsa-miR-2365      |
| IFIT5 | hsa-miR-9b-3p     |
| IFIT5 | hsa-miR-7398a-3p  |
| IFIT5 | hsa-miR-2424      |
| IFIT5 | hsa-miR-3618      |
| IFIT5 | hsa-miR-5687      |
| IFIT5 | hsa-miR-2284ab    |
| IFIT5 | hsa-miR-8485      |
| IFIT5 | hsa-miR-7344-5p   |
| IFIT5 | hsa-miR-4502      |
| IFIT5 | hsa-miR-2472      |
| IFIT5 | hsa-miR-381-3p    |
| IFIT5 | hsa-miR-6731-5p   |
| IFIT5 | hsa-miR-6890-5p   |
| IFIT5 | hsa-miR-1233-3p   |
| IFIT5 | hsa-miR-6715b-3p  |
| IFIT5 | hsa-miR-4679      |
| IFIT5 | hsa-miR-6869-5p   |
| IFIT5 | hsa-miR-4742      |
| IFIT5 | hsa-miR-6867-3p   |
| IFIT5 | hsa-miR-3190-3p   |
| IFIT5 | hsa-miR-589-5p    |
| IFIT5 | hsa-miR-654-5p    |
| IFIT5 | hsa-miR-7388c-3p  |
| IFIT5 | hsa-miR-1584-3p   |
| IFIT5 | hsa-miR-376a-1-5p |
| IFIT5 | hsa-miR-28-5p     |
| IFIT5 | hsa-miR-495-3p    |
| IFIT5 | hsa-miR-4657      |
| IFIT5 | hsa-miR-7269-5p   |
| IFIT5 | hsa-miR-7398l-5p  |
| IFIT5 | hsa-miR-548f-3p   |
| IFIT5 | hsa-miR-3920      |
| IFIT5 | hsa-miR-2290      |
| IFIT5 | hsa-miR-4698      |

|       |                  |
|-------|------------------|
| IFIT5 | hsa-miR-548      |
| IFIT5 | hsa-miR-877-5p   |
| IFIT5 | hsa-miR-579      |
| IFIT5 | hsa-miR-3973     |
| IFIT5 | hsa-miR-20-5p    |
| IFIT5 | hsa-miR-1272     |
| IFIT5 | hsa-miR-4436b-5p |
| IFIT5 | hsa-miR-95-3p    |
| IFIT5 | hsa-miR-4514     |
| IFIT5 | hsa-miR-2362     |
| IFIT5 | hsa-miR-199      |
| IFIT5 | hsa-miR-500      |
| LARP1 | hsa-miR-4278     |
| LARP1 | hsa-miR-4746-5p  |
| LARP1 | hsa-miR-8100     |
| LARP1 | hsa-miR-199-5p   |
| LARP1 | hsa-miR-450b     |
| LARP1 | hsa-miR-6812-5p  |
| LARP1 | hsa-miR-7306-5p  |
| LARP1 | hsa-miR-6529a    |
| LARP1 | hsa-miR-4492     |
| LARP1 | hsa-miR-511      |
| LARP1 | hsa-miR-6891-5p  |
| LARP1 | hsa-miR-6795-5p  |
| LARP1 | hsa-miR-6993-5p  |
| LARP1 | hsa-miR-3613-3p  |
| LARP1 | hsa-miR-7386e-5p |
| LARP1 | hsa-miR-570-3p   |
| LARP1 | hsa-miR-6561-5p  |
| LARP1 | hsa-miR-6569-5p  |
| LARP1 | hsa-miR-7070-5p  |
| LARP1 | hsa-miR-3138     |
| LARP1 | hsa-miR-124-3p   |
| LARP1 | hsa-miR-5693     |
| LARP1 | hsa-miR-7340-5p  |
| LARP1 | hsa-miR-2434     |
| LARP1 | hsa-miR-7a-2-3p  |
| LARP1 | hsa-miR-7012-5p  |
| LARP1 | hsa-miR-4303     |
| LARP1 | hsa-miR-3131     |
| LARP1 | hsa-miR-5011-5p  |
| LARP1 | hsa-miR-2116-3p  |
| LARP1 | hsa-miR-5193     |
| LARP1 | hsa-miR-6751-3p  |
| LARP1 | hsa-miR-124-3p.2 |
| LARP1 | hsa-miR-201-3p   |

|       |                  |
|-------|------------------|
| LARP1 | hsa-miR-1277-5p  |
| LARP1 | hsa-miR-6974-3p  |
| LARP1 | hsa-miR-450b-3p  |
| LARP1 | hsa-miR-6771-3p  |
| LARP1 | hsa-miR-6789-5p  |
| LARP1 | hsa-miR-21-3p    |
| LARP1 | hsa-miR-365b-5p  |
| LARP1 | hsa-miR-1976     |
| LARP1 | hsa-miR-556-5p   |
| LARP1 | hsa-miR-207      |
| LARP1 | hsa-miR-7289-3p  |
| LARP1 | hsa-miR-7114-5p  |
| LARP1 | hsa-miR-2366     |
| LARP1 | hsa-miR-3943     |
| LARP1 | hsa-miR-7268-3p  |
| LARP1 | hsa-miR-1710     |
| LARP1 | hsa-miR-376c-5p  |
| LARP1 | hsa-miR-7062-5p  |
| LARP1 | hsa-miR-124      |
| LARP1 | hsa-miR-4781-3p  |
| LARP1 | hsa-miR-6948-3p  |
| LARP1 | hsa-miR-1651-5p  |
| LARP1 | hsa-miR-619-5p   |
| LARP1 | hsa-miR-7168-5p  |
| LARP1 | hsa-miR-7386g-5p |
| LARP1 | hsa-miR-1271-5p  |
| LARP1 | hsa-miR-1842     |
| LARP1 | hsa-miR-3120-3p  |
| LARP1 | hsa-miR-7007-5p  |
| LARP1 | hsa-miR-519e-5p  |
| LARP1 | hsa-miR-378g     |
| LARP1 | hsa-miR-128-1-5p |
| LARP1 | hsa-miR-3548     |
| LARP1 | hsa-miR-148-5p   |
| LARP1 | hsa-miR-7320-5p  |
| LARP1 | hsa-miR-7357-5p  |
| LARP1 | hsa-miR-667-5p   |
| LARP1 | hsa-miR-6968-5p  |
| LARP1 | hsa-miR-635      |
| LARP1 | hsa-miR-3526     |
| LARP1 | hsa-miR-6516-5p  |
| LARP1 | hsa-miR-3658     |
| LARP1 | hsa-miR-664-5p   |
| LARP1 | hsa-miR-6320     |
| LARP1 | hsa-miR-6605-5p  |
| LARP1 | hsa-miR-1814     |



|       |                  |
|-------|------------------|
| LARP1 | hsa-miR-7194-3p  |
| LARP1 | hsa-miR-515-3p   |
| LARP1 | hsa-miR-6864-3p  |
| LARP1 | hsa-miR-1295b-5p |
| LARP1 | hsa-miR-6244     |
| LARP1 | hsa-miR-3061-3p  |
| LARP1 | hsa-miR-301      |
| LARP1 | hsa-miR-6728-3p  |
| LARP1 | hsa-miR-7040-3p  |
| LARP1 | hsa-miR-383-3p   |
| LARP1 | hsa-miR-670-3p   |
| LARP1 | hsa-miR-3183     |
| LARP1 | hsa-miR-7368-3p  |
| LARP1 | hsa-miR-508-5p   |
| LARP1 | hsa-miR-8056     |
| LARP1 | hsa-miR-4441     |
| LARP1 | hsa-miR-8808     |
| LARP1 | hsa-miR-5588-5p  |
| LARP1 | hsa-miR-1642     |
| LARP1 | hsa-miR-6737-5p  |
| LARP1 | hsa-miR-421      |
| LARP1 | hsa-miR-184      |
| LARP1 | hsa-miR-4732-5p  |
| LARP1 | hsa-miR-371b-3p  |
| LARP1 | hsa-miR-136-5p   |
| LARP1 | hsa-miR-5619-3p  |
| LARP1 | hsa-miR-7299-5p  |
| LARP1 | hsa-miR-7388b-3p |
| LARP1 | hsa-miR-8904a    |
| LARP1 | hsa-miR-525-5p   |
| LARP1 | hsa-miR-197-3p   |
| LARP1 | hsa-miR-6939-5p  |
| LARP1 | hsa-miR-548e-3p  |
| LARP1 | hsa-miR-223-5p   |
| LARP1 | hsa-miR-7264-3p  |
| LARP1 | hsa-miR-3692-3p  |
| LARP1 | hsa-miR-216      |
| LARP1 | hsa-miR-942      |
| LARP1 | hsa-miR-758-3p   |
| LARP1 | hsa-miR-7081-5p  |
| LARP1 | hsa-miR-3097-3p  |
| LARP1 | hsa-miR-8832     |
| LARP1 | hsa-miR-7386l-3p |
| LARP1 | hsa-miR-148a-5p  |
| LARP1 | hsa-miR-548c-3p  |
| LARP1 | hsa-miR-6356     |

|       |                   |
|-------|-------------------|
| LARP1 | hsa-miR-1224-5p   |
| LARP1 | hsa-miR-7187-3p   |
| LARP1 | hsa-miR-1612      |
| LARP1 | hsa-miR-5100      |
| LARP1 | hsa-miR-6922-5p   |
| LARP1 | hsa-miR-4286      |
| LARP1 | hsa-miR-184-3p    |
| LARP1 | hsa-miR-6216      |
| LARP1 | hsa-miR-8824      |
| LARP1 | hsa-miR-7687-5p   |
| LARP1 | hsa-miR-518c-5p   |
| LARP1 | hsa-miR-7065-3p   |
| LARP1 | hsa-miR-7034-5p   |
| LARP1 | hsa-miR-874-5p    |
| LARP1 | hsa-miR-4327      |
| LARP1 | hsa-miR-1958      |
| LARP1 | hsa-miR-193b-5p   |
| LARP1 | hsa-miR-3660      |
| LARP1 | hsa-miR-615-3p    |
| LARP1 | hsa-miR-1956      |
| LARP1 | hsa-miR-6965-5p   |
| LARP1 | hsa-miR-6547-3p   |
| LARP1 | hsa-miR-3547-3p   |
| LARP1 | hsa-miR-7305-5p   |
| LARP1 | hsa-miR-7684-5p   |
| LARP1 | hsa-miR-7050-3p   |
| LARP1 | hsa-miR-519       |
| LARP1 | hsa-miR-31-5p     |
| LARP1 | hsa-miR-22-3p     |
| LARP1 | hsa-miR-7451-5p   |
| LARP1 | hsa-miR-7398h-5p  |
| LARP1 | hsa-miR-3689-3p   |
| LARP1 | hsa-miR-7084-5p   |
| LARP1 | hsa-miR-6886-5p   |
| LARP1 | hsa-miR-7155-5p   |
| LARP1 | hsa-miR-3577      |
| LARP1 | hsa-miR-1732      |
| LARP1 | hsa-miR-6317      |
| LARP1 | hsa-miR-550b-2-5p |
| LARP1 | hsa-miR-4517      |
| LARP1 | hsa-miR-29b-5p    |
| LARP1 | hsa-miR-3558-3p   |
| LARP1 | hsa-miR-1967      |
| LARP1 | hsa-miR-7221-5p   |
| LARP1 | hsa-miR-337-3p    |
| LARP1 | hsa-miR-3679-3p   |

|       |                   |
|-------|-------------------|
| LARP1 | hsa-miR-873-5p    |
| LARP1 | hsa-miR-3094-5p   |
| LARP1 | hsa-miR-3163      |
| LARP1 | hsa-miR-222-3p    |
| LARP1 | hsa-miR-218a-1-3p |
| LARP1 | hsa-miR-4713-5p   |
| LARP1 | hsa-miR-4723-3p   |
| LARP1 | hsa-miR-6947-3p   |
| LARP1 | hsa-miR-4676-5p   |
| LARP1 | hsa-miR-1457      |
| LARP1 | hsa-miR-2399-3p   |
| LARP1 | hsa-miR-762       |
| LARP1 | hsa-miR-1827      |
| LARP1 | hsa-miR-7288-5p   |
| LARP1 | hsa-miR-6865-5p   |
| LARP1 | hsa-miR-129-2-3p  |
| LARP1 | hsa-miR-514a-3p   |
| LARP1 | hsa-miR-6917-3p   |
| LARP1 | hsa-miR-152-5p    |
| LARP1 | hsa-miR-506-3p    |
| LARP1 | hsa-miR-522-3p    |
| LARP1 | hsa-miR-6834-3p   |
| LARP1 | hsa-miR-6582-3p   |
| LARP1 | hsa-miR-7440-3p   |
| LARP1 | hsa-miR-6958-5p   |
| LARP1 | hsa-miR-650abc    |
| LARP1 | hsa-miR-2357      |
| LARP1 | hsa-miR-6908-3p   |
| LARP1 | hsa-miR-7158-3p   |
| LARP1 | hsa-miR-592-3p    |
| LARP1 | hsa-miR-6741-3p   |
| LARP1 | hsa-miR-466bco-5p |
| LARP1 | hsa-miR-518       |
| LARP1 | hsa-miR-450a-5p   |
| LARP1 | hsa-miR-3678-3p   |
| LARP1 | hsa-miR-3065-3p   |
| LARP1 | hsa-miR-5118      |
| LARP1 | hsa-miR-2406      |
| LARP1 | hsa-miR-1238-3p   |
| LARP1 | hsa-miR-3156-3p   |
| LARP1 | hsa-miR-7005-3p   |
| LARP1 | hsa-miR-410       |
| LARP1 | hsa-miR-2368-3p   |
| LARP1 | hsa-miR-587       |
| LARP1 | hsa-miR-7111-5p   |
| LARP1 | hsa-miR-3157-5p   |

|       |                  |
|-------|------------------|
| LARP1 | hsa-miR-7046-5p  |
| LARP1 | hsa-miR-2116-5p  |
| LARP1 | hsa-miR-676-3p   |
| LARP1 | hsa-miR-4641     |
| LARP1 | hsa-miR-6999-5p  |
| LARP1 | hsa-miR-7053-5p  |
| LARP1 | hsa-miR-20-5p    |
| LARP1 | hsa-miR-2985     |
| LARP1 | hsa-miR-4745-5p  |
| LARP1 | hsa-miR-7069-3p  |
| LARP1 | hsa-miR-3180-5p  |
| LARP1 | hsa-miR-9-5p     |
| LARP1 | hsa-miR-30e-5p   |
| LARP1 | hsa-miR-195-5p   |
| LARP1 | hsa-miR-6914-3p  |
| LARP1 | hsa-miR-548az-3p |
| LARP1 | hsa-miR-6499-3p  |
| LARP1 | hsa-miR-7359-5p  |
| LARP1 | hsa-miR-185-3p   |
| LARP1 | hsa-miR-1680-5p  |
| LARP1 | hsa-miR-764-3p   |
| LARP1 | hsa-miR-216a-3p  |
| LARP1 | hsa-miR-669      |
| LARP1 | hsa-miR-6748-5p  |
| LARP1 | hsa-miR-8884     |
| LARP1 | hsa-miR-7047-5p  |
| LARP1 | hsa-miR-506-5p   |
| LARP1 | hsa-miR-616-3p   |
| LARP1 | hsa-miR-7184-3p  |
| LARP1 | hsa-miR-2324     |
| LARP1 | hsa-miR-7022-5p  |
| LARP1 | hsa-miR-1451-5p  |
| LARP1 | hsa-miR-1296     |
| LARP1 | hsa-miR-381-3p   |
| LARP1 | hsa-miR-1273h-5p |
| LARP1 | hsa-miR-4778-3p  |
| LARP1 | hsa-miR-7020-3p  |
| LARP1 | hsa-miR-4689     |
| LARP1 | hsa-miR-7372-3p  |
| LARP1 | hsa-miR-6726-5p  |
| LARP1 | hsa-miR-6385     |
| LARP1 | hsa-miR-1285-3p  |
| LARP1 | hsa-miR-506-3p   |
| LARP1 | hsa-miR-496-3p   |
| LARP1 | hsa-miR-24-3p    |
| LARP1 | hsa-miR-7386-5p  |

|       |                 |
|-------|-----------------|
| LARP1 | hsa-miR-8863    |
| LARP1 | hsa-miR-6652-5p |
| LARP1 | hsa-miR-7243-3p |
| LARP1 | hsa-miR-6404    |
| LARP1 | hsa-miR-411-3p  |
| LARP1 | hsa-miR-2431-3p |
| LARP1 | hsa-miR-5681a   |
| LARP1 | hsa-miR-3084-5p |
| LARP1 | hsa-miR-1635    |
| LARP1 | hsa-miR-673-3p  |
| LARP1 | hsa-miR-9768-3p |
| LARP1 | hsa-miR-6501-5p |
| LARP1 | hsa-miR-1894-5p |
| LARP1 | hsa-miR-7289-5p |
| LARP1 | hsa-miR-2462    |
| LARP1 | hsa-miR-454     |
| LARP1 | hsa-miR-8803    |
| LARP1 | hsa-miR-7068-5p |
| LARP1 | hsa-miR-6535    |
| LARP1 | hsa-miR-7254-3p |
| LARP1 | hsa-miR-676-3p  |
| LARP1 | hsa-miR-6852-5p |
| LARP1 | hsa-miR-2471-3p |
| LARP1 | hsa-miR-7342-3p |
| LARP1 | hsa-miR-1911-3p |
| LARP1 | hsa-miR-105b    |
| LARP1 | hsa-miR-7170-3p |
| LARP1 | hsa-miR-653     |
| LARP1 | hsa-miR-2131-5p |
| LARP1 | hsa-miR-6849-3p |
| LARP1 | hsa-miR-6573-5p |
| LARP1 | hsa-miR-1741    |
| LARP1 | hsa-miR-467-3p  |
| LARP1 | hsa-miR-412     |
| LARP1 | hsa-miR-8092    |
| LARP1 | hsa-miR-6418-3p |
| LARP1 | hsa-miR-2364    |
| LARP1 | hsa-miR-595     |
| LARP1 | hsa-miR-7202-3p |
| LARP1 | hsa-miR-3691-3p |
| LARP1 | hsa-miR-502-5p  |
| LARP1 | hsa-miR-1915-3p |
| LARP1 | hsa-miR-154-5p  |
| LARP1 | hsa-miR-7261-3p |
| LARP1 | hsa-miR-5098    |
| LARP1 | hsa-miR-4765    |

|       |                   |
|-------|-------------------|
| LARP1 | hsa-miR-6935-5p   |
| LARP1 | hsa-miR-6513-3p   |
| LARP1 | hsa-miR-2312      |
| LARP1 | hsa-miR-6081      |
| LARP1 | hsa-miR-4502      |
| LARP1 | hsa-miR-349       |
| LARP1 | hsa-miR-26-5p     |
| LARP1 | hsa-miR-201-5p    |
| LARP1 | hsa-miR-1266-5p   |
| LARP1 | hsa-miR-7119-3p   |
| LARP1 | hsa-miR-7459-3p   |
| LARP1 | hsa-miR-26-2-3p   |
| LARP1 | hsa-miR-130c-5p   |
| LARP1 | hsa-miR-7193-3p   |
| LARP1 | hsa-miR-7198-5p   |
| LARP1 | hsa-miR-6683-3p   |
| LARP1 | hsa-miR-7088-5p   |
| LARP1 | hsa-miR-6715b-5p  |
| LARP1 | hsa-miR-336-5p    |
| LARP1 | hsa-miR-7351-5p   |
| LARP1 | hsa-miR-3609      |
| LARP1 | hsa-miR-7008-3p   |
| LARP1 | hsa-miR-4659a-3p  |
| LARP1 | hsa-miR-7059-3p   |
| LARP1 | hsa-miR-6777-3p   |
| LARP1 | hsa-miR-672-5p    |
| LARP1 | hsa-miR-129-5p    |
| LARP1 | hsa-miR-7191-3p   |
| LARP1 | hsa-miR-7398a-3p  |
| LARP1 | hsa-miR-6830-3p   |
| LARP1 | hsa-miR-6755-5p   |
| LARP1 | hsa-miR-146a-3p   |
| LARP1 | hsa-miR-583       |
| LARP1 | hsa-miR-7681-3p   |
| LARP1 | hsa-miR-1185-3p   |
| LARP1 | hsa-miR-1587      |
| LARP1 | hsa-miR-7259-3p   |
| LARP1 | hsa-miR-6780a-5p  |
| LARP1 | hsa-miR-3176      |
| LARP1 | hsa-miR-3167-5p   |
| LARP1 | hsa-miR-101a-3p.2 |
| LARP1 | hsa-miR-519-3p    |
| LARP1 | hsa-miR-1952      |
| LARP1 | hsa-miR-624-3p    |
| LARP1 | hsa-miR-6778-3p   |
| LARP1 | hsa-miR-4322      |

|       |                   |
|-------|-------------------|
| LARP1 | hsa-miR-3577-5p   |
| LARP1 | hsa-miR-1584-3p   |
| LARP1 | hsa-miR-7341-5p   |
| LARP1 | hsa-miR-6610-3p   |
| LARP1 | hsa-miR-204-3p    |
| LARP1 | hsa-miR-28-5p     |
| LARP1 | hsa-miR-367-5p    |
| LARP1 | hsa-miR-6617-3p   |
| LARP1 | hsa-miR-200c-5p   |
| LARP1 | hsa-miR-873a-5p.2 |
| LARP1 | hsa-miR-2407      |
| LARP1 | hsa-miR-3925-3p   |
| LARP1 | hsa-miR-6759-5p   |
| LARP1 | hsa-miR-186-3p    |
| LARP1 | hsa-miR-7035-5p   |
| LARP1 | hsa-miR-1894-3p   |
| LARP1 | hsa-miR-6165      |
| LARP1 | hsa-miR-18        |
| LARP1 | hsa-miR-29a-5p    |
| LARP1 | hsa-miR-7335-5p   |
| LARP1 | hsa-miR-7044-5p   |
| LARP1 | hsa-miR-5001-5p   |
| LARP1 | hsa-miR-6773-5p   |
| LARP1 | hsa-miR-1787      |
| LARP1 | hsa-miR-30a-3p    |
| LARP1 | hsa-miR-2424      |
| LARP1 | hsa-miR-7386h-3p  |
| LARP1 | hsa-miR-4747-5p   |
| LARP1 | hsa-miR-6967-3p   |
| LARP1 | hsa-miR-2385-5p   |
| LARP1 | hsa-miR-7390-5p   |
| LARP1 | hsa-miR-7286-3p   |
| LARP1 | hsa-miR-6813-5p   |
| LARP1 | hsa-miR-214-3p    |
| LARP1 | hsa-miR-2888      |
| LARP1 | hsa-miR-3552      |
| LARP1 | hsa-miR-7256-5p   |
| LARP1 | hsa-miR-608       |
| LARP1 | hsa-miR-32-3p     |
| LARP1 | hsa-miR-4768-3p   |
| LARP1 | hsa-miR-1705      |
| LARP1 | hsa-miR-7075-3p   |
| LARP1 | hsa-miR-7398j-3p  |
| LARP1 | hsa-miR-298-5p    |
| LARP1 | hsa-miR-618       |
| LARP1 | hsa-miR-539-5p    |

|       |                   |
|-------|-------------------|
| LARP1 | hsa-miR-6072      |
| LARP1 | hsa-miR-7461-5p   |
| LARP1 | hsa-miR-1233-5p   |
| LARP1 | hsa-miR-2129      |
| LARP1 | hsa-miR-7019-5p   |
| LARP1 | hsa-miR-2412      |
| LARP1 | hsa-miR-2285      |
| LARP1 | hsa-miR-144-3p    |
| LARP1 | hsa-miR-1270      |
| LARP1 | hsa-miR-200b-5p   |
| LARP1 | hsa-miR-7224-3p   |
| LARP1 | hsa-miR-3059-3p   |
| LARP1 | hsa-miR-7975      |
| LARP1 | hsa-miR-760-3p    |
| LARP1 | hsa-miR-409-3p    |
| LARP1 | hsa-miR-7159-3p   |
| LARP1 | hsa-miR-548ah-5p  |
| LARP1 | hsa-miR-642-3p    |
| LARP1 | hsa-miR-4516      |
| LARP1 | hsa-miR-7082-3p   |
| LARP1 | hsa-miR-6810-5p   |
| LARP1 | hsa-miR-6990-5p   |
| LARP1 | hsa-miR-7371-5p   |
| LARP1 | hsa-miR-2285r     |
| LARP1 | hsa-miR-8847      |
| LARP1 | hsa-miR-7078-5p   |
| LARP1 | hsa-miR-382-5p    |
| LARP1 | hsa-miR-1305      |
| LARP1 | hsa-miR-6396      |
| LARP1 | hsa-miR-6991-3p   |
| LARP1 | hsa-miR-3058-5p   |
| LARP1 | hsa-miR-4668-3p   |
| LARP1 | hsa-miR-3136-3p   |
| LARP1 | hsa-miR-199-3p    |
| LARP1 | hsa-miR-6867-3p   |
| LARP1 | hsa-miR-3085-3p   |
| LARP1 | hsa-miR-3057-3p   |
| LARP1 | hsa-miR-4433a-3p  |
| LARP1 | hsa-miR-2467-3p   |
| LARP1 | hsa-miR-936       |
| LARP1 | hsa-miR-5698      |
| LARP1 | hsa-miR-19-5p     |
| LARP1 | hsa-miR-7269-5p   |
| LARP1 | hsa-miR-1663-3p   |
| LARP1 | hsa-miR-466b-4-3p |
| LARP1 | hsa-miR-664       |



|       |                 |
|-------|-----------------|
| LARP1 | hsa-miR-1794    |
| LARP1 | hsa-miR-150-5p  |
| LARP1 | hsa-miR-187-5p  |
| LARP1 | hsa-miR-4468    |
| LARP1 | hsa-miR-3596    |
| LARP1 | hsa-miR-6365    |
| LARP1 | hsa-miR-3061-5p |
| LARP1 | hsa-miR-1568    |
| LARP1 | hsa-miR-597-5p  |
| LARP1 | hsa-miR-6373    |
| LARP1 | hsa-miR-205-5p  |
| LARP1 | hsa-miR-548a-3p |
| LARP1 | hsa-miR-2450a   |
| LARP1 | hsa-miR-3135b   |
| LARP1 | hsa-miR-6608-5p |
| LARP1 | hsa-miR-8119    |
| LARP1 | hsa-miR-8107    |
| LARP1 | hsa-miR-743b-3p |
| LARP1 | hsa-miR-939-5p  |
| LARP1 | hsa-miR-298-3p  |
| LARP1 | hsa-miR-892b    |
| LARP1 | hsa-miR-15b-3p  |
| LARP1 | hsa-miR-616-5p  |
| LARP1 | hsa-miR-766-3p  |
| LARP1 | hsa-miR-6940-3p |
| LARP1 | hsa-miR-4296    |
| LARP1 | hsa-miR-6810-3p |
| LARP1 | hsa-let-7j-3p   |
| LARP1 | hsa-miR-504-3p  |
| LARP1 | hsa-miR-5703    |
| LARP1 | hsa-miR-145-3p  |
| LARP1 | hsa-miR-103b    |
| LARP1 | hsa-miR-6952-5p |
| LARP1 | hsa-miR-7081-3p |
| LARP1 | hsa-miR-4664-5p |
| LARP1 | hsa-miR-6802-5p |
| LARP1 | hsa-miR-6817-5p |
| LARP1 | hsa-miR-2284s   |
| LARP1 | hsa-miR-8085    |
| LARP1 | hsa-miR-766-3p  |
| LARP1 | hsa-miR-524-5p  |
| LARP1 | hsa-miR-7006-5p |
| LARP1 | hsa-miR-210-5p  |
| LARP1 | hsa-miR-6868-5p |
| LARP1 | hsa-miR-374     |
| LARP1 | hsa-miR-6862-3p |

|       |                   |
|-------|-------------------|
| LARP1 | hsa-miR-6734-5p   |
| LARP1 | hsa-miR-513a      |
| LARP1 | hsa-miR-7399-5p   |
| LARP1 | hsa-miR-4526      |
| LARP1 | hsa-miR-6796-5p   |
| LARP1 | hsa-miR-6954-5p   |
| LARP1 | hsa-miR-4751      |
| LARP1 | hsa-miR-2285z     |
| LARP1 | hsa-miR-3596d     |
| LARP1 | hsa-miR-6338      |
| LARP1 | hsa-miR-2114-5p   |
| LARP1 | hsa-miR-365-12-5p |
| LARP1 | hsa-miR-8052      |
| LARP1 | hsa-miR-6930-3p   |
| LARP1 | hsa-miR-1199-5p   |
| LARP1 | hsa-miR-432-5p    |
| LARP1 | hsa-miR-548d-5p   |
| LARP1 | hsa-miR-6826-5p   |
| LARP1 | hsa-miR-124-3p.1  |
| LARP1 | hsa-miR-7076-5p   |
| LARP1 | hsa-miR-1664-3p   |
| LARP1 | hsa-miR-1188-5p   |
| LARP1 | hsa-miR-1545a-5p  |
| LARP1 | hsa-miR-7352-3p   |
| LARP1 | hsa-miR-194-2-3p  |
| LARP1 | hsa-miR-4731-3p   |
| LARP1 | hsa-miR-7386l-5p  |
| LARP1 | hsa-miR-429-5p    |
| LARP1 | hsa-miR-463-3p    |
| LARP1 | hsa-miR-6598-5p   |
| LARP1 | hsa-miR-7376-3p   |
| LARP1 | hsa-miR-548i-3p   |
| LARP1 | hsa-miR-7657-5p   |
| LARP1 | hsa-miR-211-5p    |
| LARP1 | hsa-miR-2904      |
| LARP1 | hsa-miR-6586-5p   |
| LARP1 | hsa-miR-6860      |
| LARP1 | hsa-miR-6762-5p   |
| LARP1 | hsa-miR-7442-5p   |
| LARP1 | hsa-miR-466c-3p   |
| LARP1 | hsa-miR-6934-3p   |
| LARP1 | hsa-miR-6418-5p   |
| LARP1 | hsa-miR-3083-5p   |
| LARP1 | hsa-miR-6732-5p   |
| LARP1 | hsa-miR-6822-5p   |
| LARP1 | hsa-miR-145a-3p   |

|       |                   |
|-------|-------------------|
| LARP1 | hsa-miR-218-5p    |
| LARP1 | hsa-miR-25-5p     |
| LARP1 | hsa-miR-98-3p     |
| LARP1 | hsa-miR-7052-5p   |
| LARP1 | hsa-miR-142       |
| LARP1 | hsa-miR-6953-3p   |
| LARP1 | hsa-miR-2893      |
| LARP1 | hsa-miR-193-3p    |
| LARP1 | hsa-miR-7385f-3p  |
| LARP1 | hsa-miR-329-5p    |
| LARP1 | hsa-miR-6984-3p   |
| LARP1 | hsa-miR-181a-2-3p |
| LARP1 | hsa-miR-7856-5p   |
| LARP1 | hsa-miR-7110-3p   |
| LARP1 | hsa-miR-29-5p     |
| LARP1 | hsa-miR-6923-3p   |
| LARP1 | hsa-miR-654-5p    |
| LARP1 | hsa-miR-452-3p    |
| LARP1 | hsa-miR-488-5p    |
| LARP1 | hsa-miR-1614-3p   |
| LARP1 | hsa-miR-1982-3p   |
| LARP1 | hsa-miR-8075      |
| LARP1 | hsa-miR-377-3p    |
| LARP1 | hsa-miR-6819-5p   |
| LARP1 | hsa-miR-770-3p    |
| LARP1 | hsa-miR-7398-5p   |
| LARP1 | hsa-miR-7371b-5p  |
| LARP1 | hsa-miR-1929-3p   |
| LARP1 | hsa-miR-4756-3p   |
| LARP1 | hsa-miR-6793-5p   |
| LARP1 | hsa-miR-744-5p    |
| LARP1 | hsa-miR-489-3p    |
| LARP1 | hsa-miR-7003-3p   |
| LARP1 | hsa-miR-6986-5p   |
| LARP1 | hsa-miR-4789-5p   |
| LARP1 | hsa-miR-2442      |
| LARP1 | hsa-miR-6931-5p   |
| LARP1 | hsa-miR-585-5p    |
| LARP1 | hsa-miR-4667-5p   |
| LARP1 | hsa-miR-7207-5p   |
| LARP1 | hsa-miR-3110-5p   |
| LARP1 | hsa-miR-561-5p    |
| LARP1 | hsa-miR-3068-5p   |
| LARP1 | hsa-miR-665-3p    |
| LARP1 | hsa-miR-6576-3p   |
| LARP1 | hsa-miR-6962-3p   |

|       |                   |
|-------|-------------------|
| LARP1 | hsa-miR-17-3p     |
| LARP1 | hsa-miR-7297-3p   |
| LARP1 | hsa-miR-1456-5p   |
| LARP1 | hsa-miR-193b-3p   |
| LARP1 | hsa-miR-4744      |
| LARP1 | hsa-miR-6829-3p   |
| LARP1 | hsa-miR-4796-5p   |
| LARP1 | hsa-miR-5124a     |
| LARP1 | hsa-miR-2335      |
| LARP1 | hsa-miR-2329-3p   |
| LARP1 | hsa-miR-1231-3p   |
| LARP1 | hsa-miR-4495      |
| LARP1 | hsa-miR-363-5p    |
| LARP1 | hsa-miR-7368-5p   |
| LARP1 | hsa-miR-140-5p    |
| LARP1 | hsa-miR-6900-3p   |
| LARP1 | hsa-miR-6907-5p   |
| LARP1 | hsa-miR-101-3p    |
| LARP1 | hsa-miR-133a-3p.2 |
| LARP1 | hsa-miR-5114      |
| LARP1 | hsa-miR-7314-5p   |
| LARP1 | hsa-miR-2285ad    |
| LARP1 | hsa-miR-216a      |
| LARP1 | hsa-miR-6751-5p   |
| LARP1 | hsa-miR-327       |
| LARP1 | hsa-miR-7688-5p   |
| LARP1 | hsa-miR-380-5p    |
| LARP1 | hsa-miR-129-3p    |
| LARP1 | hsa-miR-1720-5p   |
| LARP1 | hsa-miR-3123      |
| LARP1 | hsa-miR-344i      |
| LARP1 | hsa-miR-6917-5p   |
| LARP1 | hsa-miR-743a-3p   |
| LARP1 | hsa-miR-7303-5p   |
| LARP1 | hsa-miR-7160-5p   |
| LARP1 | hsa-miR-6842-5p   |
| LARP1 | hsa-miR-1301-3p   |
| LARP1 | hsa-miR-3125      |
| LARP1 | hsa-miR-26        |
| LARP1 | hsa-miR-103-5p    |
| LARP1 | hsa-miR-135a-2-3p |
| LARP1 | hsa-miR-592       |
| LARP1 | hsa-miR-6832-5p   |
| LARP1 | hsa-miR-4749-3p   |
| LARP1 | hsa-miR-1199-3p   |
| LARP1 | hsa-miR-188-3p    |

|       |                  |
|-------|------------------|
| LARP1 | hsa-miR-7057-5p  |
| LARP1 | hsa-miR-4763-3p  |
| LARP1 | hsa-miR-6916-5p  |
| LARP1 | hsa-miR-7462-3p  |
| LARP1 | hsa-miR-5125     |
| LARP1 | hsa-miR-6873-5p  |
| LARP1 | hsa-miR-708-5p   |
| LARP1 | hsa-miR-4649-3p  |
| LARP1 | hsa-miR-382-3p   |
| LARP1 | hsa-miR-7064-5p  |
| LARP1 | hsa-miR-4667-3p  |
| LARP1 | hsa-miR-1943-5p  |
| LARP1 | hsa-miR-3922-3p  |
| LARP1 | hsa-miR-6951-3p  |
| LARP1 | hsa-miR-6553-3p  |
| LARP1 | hsa-miR-7481-3p  |
| LARP1 | hsa-miR-7325-5p  |
| LARP1 | hsa-miR-196a-3p  |
| LARP1 | hsa-miR-320e     |
| LARP1 | hsa-miR-1953     |
| LARP1 | hsa-miR-6730-5p  |
| LARP1 | hsa-miR-1226-5p  |
| LARP1 | hsa-miR-770-5p   |
| LARP1 | hsa-miR-4722-3p  |
| LARP1 | hsa-miR-6855-5p  |
| LARP1 | hsa-miR-7386a-5p |
| LARP1 | hsa-miR-4722-5p  |
| LARP1 | hsa-miR-351-5p   |
| LARP1 | hsa-miR-3073a-3p |
| LARP1 | hsa-miR-7397-3p  |
| LARP1 | hsa-miR-5685     |
| LARP1 | hsa-miR-3969     |
| LARP1 | hsa-miR-3619-5p  |
| LARP1 | hsa-miR-6371     |
| LARP1 | hsa-miR-140-3p.2 |
| LARP1 | hsa-miR-6541     |
| LARP1 | hsa-miR-7367-5p  |
| LARP1 | hsa-miR-371a-5p  |
| LARP1 | hsa-miR-450b-5p  |
| LARP1 | hsa-miR-1548-5p  |
| LARP1 | hsa-miR-205-5p   |
| LARP1 | hsa-miR-1790     |
| LARP1 | hsa-miR-196-5p   |
| LARP1 | hsa-miR-3091-3p  |
| LARP1 | hsa-miR-3189-3p  |
| LARP1 | hsa-miR-1786     |

|       |                  |
|-------|------------------|
| LARP1 | hsa-miR-3116     |
| LARP1 | hsa-miR-8089     |
| LARP1 | hsa-miR-7249-5p  |
| LARP1 | hsa-miR-432-3p   |
| LARP1 | hsa-miR-7691     |
| LARP1 | hsa-miR-7324-3p  |
| LARP1 | hsa-miR-655      |
| LARP1 | hsa-miR-4430     |
| LARP1 | hsa-miR-372-5p   |
| LARP1 | hsa-miR-6790-5p  |
| LARP1 | hsa-miR-291      |
| LARP1 | hsa-miR-1229-5p  |
| LARP1 | hsa-miR-1237-3p  |
| LARP1 | hsa-miR-6724-5p  |
| LARP1 | hsa-miR-6344     |
| LARP1 | hsa-miR-4446-3p  |
| LARP1 | hsa-miR-1728-5p  |
| LARP1 | hsa-miR-5591-3p  |
| LARP1 | hsa-miR-6955-5p  |
| LARP1 | hsa-miR-1912     |
| LARP1 | hsa-miR-4313     |
| LARP1 | hsa-miR-3617-5p  |
| LARP1 | hsa-miR-3557-5p  |
| LARP1 | hsa-miR-939-3p   |
| LARP1 | hsa-let-7a-2-3p  |
| LARP1 | hsa-miR-6800-5p  |
| LARP1 | hsa-miR-22-5p    |
| LARP1 | hsa-miR-548aef   |
| LARP1 | hsa-miR-196b-3p  |
| LARP1 | hsa-miR-2429     |
| LARP1 | hsa-miR-2360     |
| LARP1 | hsa-miR-496.2    |
| LARP1 | hsa-miR-30-5p    |
| LARP1 | hsa-miR-203      |
| LARP1 | hsa-miR-671-5p   |
| LARP1 | hsa-miR-4310     |
| LARP1 | hsa-miR-224-5p   |
| LARP1 | hsa-miR-6417     |
| LARP1 | hsa-miR-5582-3p  |
| LARP1 | hsa-miR-101-1-5p |
| LARP1 | hsa-miR-5088-3p  |
| LARP1 | hsa-miR-2466-3p  |
| LARP1 | hsa-miR-1225     |
| LARP1 | hsa-miR-3128     |
| LARP1 | hsa-miR-214-5p   |
| LARP1 | hsa-miR-2421     |

|       |                  |
|-------|------------------|
| LARP1 | hsa-miR-4793-5p  |
| LARP1 | hsa-miR-6132     |
| LARP1 | hsa-miR-4780     |
| LARP1 | hsa-miR-193-5p   |
| LARP1 | hsa-miR-330-3p   |
| LARP1 | hsa-miR-335-5p   |
| LARP1 | hsa-miR-3651     |
| LARP1 | hsa-miR-6981-5p  |
| LARP1 | hsa-miR-7240-5p  |
| LARP1 | hsa-miR-371a-3p  |
| LARP1 | hsa-miR-4520-5p  |
| LARP1 | hsa-miR-7185-3p  |
| LARP1 | hsa-miR-1193-5p  |
| LARP1 | hsa-miR-4316     |
| LARP1 | hsa-miR-7117-3p  |
| LARP1 | hsa-miR-7071-5p  |
| LARP1 | hsa-miR-6868-3p  |
| LARP1 | hsa-miR-548i-5p  |
| LARP1 | hsa-miR-6540-3p  |
| LARP1 | hsa-miR-6630-3p  |
| LARP1 | hsa-miR-1283     |
| LARP1 | hsa-miR-1545c-3p |
| LARP1 | hsa-miR-3085-5p  |
| LARP1 | hsa-miR-8908f    |
| LARP1 | hsa-miR-7385d-3p |
| LARP1 | hsa-miR-5699-5p  |
| LARP1 | hsa-miR-7216-5p  |
| LARP1 | hsa-miR-4758-3p  |
| LARP1 | hsa-miR-96-5p    |
| LARP1 | hsa-miR-6837-5p  |
| LARP1 | hsa-miR-369-3p   |
| LARP1 | hsa-miR-4423-5p  |
| LARP1 | hsa-miR-378      |
| LARP1 | hsa-miR-7357-3p  |
| LARP1 | hsa-miR-7080-5p  |
| LARP1 | hsa-miR-760-5p   |
| LARP1 | hsa-miR-24-3p    |
| LARP1 | hsa-miR-4490     |
| LARP1 | hsa-miR-4711-3p  |
| LARP1 | hsa-miR-7668-3p  |
| LARP1 | hsa-miR-96-5p    |
| LARP1 | hsa-miR-1329-5p  |
| LARP1 | hsa-miR-2317     |
| LARP1 | hsa-miR-7676-5p  |
| LARP1 | hsa-miR-1809     |
| LARP1 | hsa-miR-4684-5p  |

|       |                  |
|-------|------------------|
| LARP1 | hsa-miR-1453     |
| LARP1 | hsa-miR-3910     |
| LARP1 | hsa-miR-5621-3p  |
| LARP1 | hsa-miR-503-5p   |
| LARP1 | hsa-miR-1773-5p  |
| LARP1 | hsa-miR-7009-5p  |
| LARP1 | hsa-miR-2325     |
| LARP1 | hsa-miR-7000-5p  |
| LARP1 | hsa-miR-3661     |
| LARP1 | hsa-miR-1841     |
| LARP1 | hsa-miR-6995-3p  |
| LARP1 | hsa-miR-4799-3p  |
| LARP1 | hsa-miR-1693     |
| LARP1 | hsa-miR-7214-3p  |
| LARP1 | hsa-miR-7386h-5p |
| LARP1 | hsa-miR-4498     |
| LARP1 | hsa-miR-338-5p   |
| LARP1 | hsa-miR-6779-3p  |
| LARP1 | hsa-miR-6989-3p  |
| LARP1 | hsa-miR-7093-5p  |
| LARP1 | hsa-miR-1556     |
| LARP1 | hsa-miR-1938     |
| LARP1 | hsa-miR-498      |
| LARP1 | hsa-miR-8093     |
| LARP1 | hsa-miR-628-3p   |
| LARP1 | hsa-miR-7220-5p  |
| LARP1 | hsa-miR-6735-3p  |
| LARP1 | hsa-miR-5591-5p  |
| LARP1 | hsa-miR-1251-5p  |
| LARP1 | hsa-miR-8111     |
| LARP1 | hsa-miR-449-5p   |
| LARP1 | hsa-miR-34b-3p   |
| LARP1 | hsa-miR-648      |
| LARP1 | hsa-miR-28-5p    |
| LARP1 | hsa-miR-3590-5p  |
| LARP1 | hsa-miR-873-5p   |
| LARP1 | hsa-miR-1772-5p  |
| LARP1 | hsa-miR-4447     |
| LARP1 | hsa-miR-6721-5p  |
| LARP1 | hsa-miR-370      |
| LARP1 | hsa-miR-138-5p   |
| LARP1 | hsa-miR-27-5p    |
| LARP1 | hsa-miR-6411     |
| LARP1 | hsa-miR-328      |
| LARP1 | hsa-miR-93-5p    |
| LARP1 | hsa-miR-1791-5p  |



|       |                 |
|-------|-----------------|
| LARP1 | hsa-miR-4771    |
| LARP1 | hsa-miR-2431-5p |
| LARP1 | hsa-miR-544b    |
| LARP1 | hsa-miR-1659    |
| LARP1 | hsa-miR-7054-5p |
| LARP1 | hsa-miR-6556-5p |
| LARP1 | hsa-miR-8059    |
| LARP1 | hsa-miR-7454-3p |
| LARP1 | hsa-miR-4253    |
| LARP1 | hsa-miR-7466-3p |
| LARP1 | hsa-miR-7168-3p |
| LARP1 | hsa-miR-361-5p  |
| LARP1 | hsa-miR-7042-3p |
| LARP1 | hsa-miR-30e-3p  |
| LARP1 | hsa-miR-185-5p  |
| LARP1 | hsa-miR-8062    |
| LARP1 | hsa-miR-451-3p  |
| LARP1 | hsa-miR-362-5p  |
| LARP1 | hsa-miR-7001-3p |
| LARP1 | hsa-miR-467f    |
| LARP1 | hsa-miR-132-3p  |
| LARP1 | hsa-miR-7020-5p |
| LARP1 | hsa-miR-300-5p  |
| LARP1 | hsa-miR-758-5p  |
| LARP1 | hsa-miR-659-3p  |
| LARP1 | hsa-miR-3079-3p |
| LARP1 | hsa-miR-6766-5p |
| LARP1 | hsa-miR-5087    |
| LARP1 | hsa-miR-27a-5p  |
| LARP1 | hsa-miR-665     |
| LARP1 | hsa-miR-7321-5p |
| LARP1 | hsa-miR-7085-5p |
| LARP1 | hsa-miR-7031-3p |
| LARP1 | hsa-miR-3064-3p |
| LARP1 | hsa-miR-1248    |
| LARP1 | hsa-miR-26b-3p  |
| LARP1 | hsa-miR-1903    |
| LARP1 | hsa-miR-221-5p  |
| LARP1 | hsa-miR-6742-3p |
| LARP1 | hsa-miR-6572-3p |
| LARP1 | hsa-miR-7287-3p |
| LARP1 | hsa-miR-184-5p  |
| LARP1 | hsa-miR-1287-3p |
| LARP1 | hsa-miR-6813-3p |
| LARP1 | hsa-miR-346-3p  |
| LARP1 | hsa-miR-6834-5p |

|       |                  |
|-------|------------------|
| LARP1 | hsa-miR-7039-5p  |
| LARP1 | hsa-miR-7365-3p  |
| LARP1 | hsa-miR-2287     |
| LARP1 | hsa-miR-4801     |
| LARP1 | hsa-miR-6120-3p  |
| LARP1 | hsa-miR-5106     |
| LARP1 | hsa-miR-1982-5p  |
| LARP1 | hsa-miR-7117-5p  |
| LARP1 | hsa-miR-329      |
| LARP1 | hsa-miR-7184-5p  |
| LARP1 | hsa-miR-199-1-5p |
| LARP1 | hsa-miR-6077     |
| LARP1 | hsa-miR-7335-3p  |
| LARP1 | hsa-miR-542-5p   |
| LARP1 | hsa-miR-23       |
| LARP1 | hsa-miR-2489     |
| LARP1 | hsa-miR-6325     |
| LARP1 | hsa-miR-5196-3p  |
| LARP1 | hsa-miR-1233-3p  |
| LARP1 | hsa-miR-670      |
| LARP1 | hsa-miR-3664-3p  |
| LARP1 | hsa-miR-7250-3p  |
| LARP1 | hsa-miR-6953-5p  |
| LARP1 | hsa-miR-3919     |
| LARP1 | hsa-miR-7308-3p  |
| LARP1 | hsa-miR-6978-5p  |
| LARP1 | hsa-miR-7276-3p  |
| LARP1 | hsa-miR-6748-3p  |
| LARP1 | hsa-miR-4428     |
| LARP1 | hsa-miR-92a-5p   |
| LARP1 | hsa-miR-705      |
| LARP1 | hsa-miR-3937     |
| LARP1 | hsa-miR-499a-3p  |
| LARP1 | hsa-miR-2432     |
| LARP1 | hsa-miR-877-5p   |
| LARP1 | hsa-miR-6800-3p  |
| LARP1 | hsa-miR-3613b    |
| LARP1 | hsa-miR-27b-5p   |
| LARP1 | hsa-miR-518-5p   |
| LARP1 | hsa-miR-3153     |
| LARP1 | hsa-miR-7150     |
| LARP1 | hsa-miR-6510-5p  |
| LARP1 | hsa-miR-7025-5p  |
| LARP1 | hsa-miR-491-5p   |
| LARP1 | hsa-miR-347      |
| LARP1 | hsa-miR-6506-5p  |

|       |                  |
|-------|------------------|
| LARP1 | hsa-miR-182-3p   |
| LARP1 | hsa-let-7b-3p    |
| LARP1 | hsa-miR-27       |
| LARP1 | hsa-miR-4719     |
| LARP1 | hsa-miR-6372     |
| LARP1 | hsa-miR-7156-5p  |
| LARP1 | hsa-miR-7386m-5p |
| LARP1 | hsa-miR-1808     |
| LARP1 | hsa-miR-7363-5p  |
| LARP1 | hsa-miR-4256     |
| LARP1 | hsa-miR-6699-5p  |
| LARP1 | hsa-miR-8827     |
| LARP1 | hsa-miR-362-5p   |
| LARP1 | hsa-miR-7074-5p  |
| LARP1 | hsa-miR-370-5p   |
| LARP1 | hsa-miR-1594     |
| LARP1 | hsa-miR-194-5p   |
| LARP1 | hsa-miR-499      |
| LARP1 | hsa-miR-623      |
| LARP1 | hsa-miR-6809-5p  |
| LARP1 | hsa-miR-6715a-3p |
| LARP1 | hsa-miR-1737     |
| LARP1 | hsa-miR-2405     |
| LARP1 | hsa-miR-2446     |
| LARP1 | hsa-miR-551b-5p  |
| LARP1 | hsa-miR-7316-5p  |
| LARP1 | hsa-miR-1747-3p  |
| LARP1 | hsa-miR-7351-3p  |
| LARP1 | hsa-miR-7454-5p  |
| LARP1 | hsa-miR-7371-3p  |
| LARP1 | hsa-miR-6885-5p  |
| LARP1 | hsa-miR-5697     |
| LARP1 | hsa-miR-2285y    |
| LARP1 | hsa-miR-1955-5p  |
| LARP1 | hsa-miR-7346-3p  |
| LARP1 | hsa-miR-1343     |
| LARP1 | hsa-miR-4696     |
| LARP1 | hsa-miR-2474     |
| LARP1 | hsa-miR-8818     |
| LARP1 | hsa-miR-8098     |
| LARP1 | hsa-miR-6780a-3p |
| LARP1 | hsa-miR-544a     |
| LARP1 | hsa-miR-18-5p    |
| LARP1 | hsa-miR-125-5p   |
| LARP1 | hsa-miR-873b     |
| LARP1 | hsa-miR-493-5p   |

|       |                  |
|-------|------------------|
| LARP1 | hsa-miR-15-5p    |
| LARP1 | hsa-miR-149-5p   |
| LARP1 | hsa-miR-609      |
| LARP1 | hsa-miR-7155-3p  |
| LARP1 | hsa-miR-6888-5p  |
| LARP1 | hsa-miR-4328     |
| LARP1 | hsa-miR-6518     |
| LARP1 | hsa-miR-6835-5p  |
| LARP1 | hsa-miR-7482-3p  |
| LARP1 | hsa-miR-548ai    |
| LARP1 | hsa-miR-3619-3p  |
| LARP1 | hsa-miR-7317-3p  |
| LARP1 | hsa-miR-1813     |
| LARP1 | hsa-miR-297bc-3p |
| LARP1 | hsa-miR-500b-5p  |
| LARP1 | hsa-miR-143-3p   |
| LARP1 | hsa-miR-885      |
| LARP1 | hsa-miR-6695-5p  |
| LARP1 | hsa-miR-6760-5p  |
| LARP1 | hsa-miR-6405     |
| LARP1 | hsa-miR-101a-5p  |
| LARP1 | hsa-miR-212-3p   |
| LARP1 | hsa-miR-216c-3p  |
| LARP1 | hsa-miR-133b     |
| LARP1 | hsa-miR-7118-5p  |
| LARP1 | hsa-miR-6624-3p  |
| LARP1 | hsa-miR-6881-3p  |
| LARP1 | hsa-miR-1777     |
| LARP1 | hsa-miR-4779     |
| LARP1 | hsa-miR-1608     |
| LARP1 | hsa-miR-1207-5p  |
| LARP1 | hsa-miR-5189-5p  |
| LARP1 | hsa-miR-511-5p   |
| LARP1 | hsa-miR-6804-5p  |
| LARP1 | hsa-miR-516a     |
| LARP1 | hsa-miR-539-5p   |
| LARP1 | hsa-miR-3587     |
| LARP1 | hsa-miR-383-5p.1 |
| LARP1 | hsa-miR-7217-5p  |
| LARP1 | hsa-miR-6873-3p  |
| LARP1 | hsa-miR-7270-3p  |
| LARP1 | hsa-miR-8905     |
| LARP1 | hsa-miR-6752-5p  |
| LARP1 | hsa-let-7ag-3p   |
| LARP1 | hsa-miR-5006-3p  |
| LARP1 | hsa-miR-551-5p   |

|       |                  |
|-------|------------------|
| LARP1 | hsa-miR-2285af   |
| LARP1 | hsa-miR-205-3p   |
| LARP1 | hsa-miR-712-5p   |
| LARP1 | hsa-miR-107-3p   |
| LARP1 | hsa-miR-204-5p   |
| LARP1 | hsa-miR-7354-5p  |
| LARP1 | hsa-miR-891      |
| LARP1 | hsa-miR-4471     |
| LARP1 | hsa-miR-4726-3p  |
| LARP1 | hsa-miR-132-3p   |
| LARP1 | hsa-miR-6758-3p  |
| LARP1 | hsa-miR-7237-3p  |
| LARP1 | hsa-miR-7478-5p  |
| LARP1 | hsa-miR-6825-5p  |
| LARP1 | hsa-miR-877-3p   |
| LARP1 | hsa-miR-466-5p   |
| LARP1 | hsa-miR-466i-3p  |
| LARP1 | hsa-miR-3090-3p  |
| LARP1 | hsa-miR-455-3p   |
| LARP1 | hsa-miR-1740-3p  |
| LARP1 | hsa-miR-4446-5p  |
| LARP1 | hsa-miR-4652-3p  |
| LARP1 | hsa-miR-431-3p   |
| LARP1 | hsa-miR-6661-5p  |
| LARP1 | hsa-miR-6545-5p  |
| LARP1 | hsa-miR-6858-5p  |
| LARP1 | hsa-miR-7022-3p  |
| LARP1 | hsa-miR-3471     |
| LARP1 | hsa-miR-6768-3p  |
| LARP1 | hsa-miR-130      |
| LARP1 | hsa-miR-2330-5p  |
| LARP1 | hsa-miR-341-5p   |
| LARP1 | hsa-miR-2347     |
| LARP1 | hsa-miR-3101-5p  |
| LARP1 | hsa-miR-3187-5p  |
| LARP1 | hsa-miR-4752     |
| LARP1 | hsa-miR-6120-5p  |
| LARP1 | hsa-miR-759      |
| LARP1 | hsa-miR-300      |
| LARP1 | hsa-miR-92a-1-5p |
| LARP1 | hsa-miR-6720-5p  |
| LARP1 | hsa-miR-6851-3p  |
| LARP1 | hsa-miR-4419b    |
| LARP1 | hsa-miR-296-5p   |
| LARP1 | hsa-miR-3618-3p  |
| LARP1 | hsa-miR-7242-5p  |

|       |                  |
|-------|------------------|
| LARP1 | hsa-miR-2355-5p  |
| LARP1 | hsa-miR-483-3p   |
| LARP1 | hsa-miR-3914     |
| LARP1 | hsa-miR-6937-3p  |
| LARP1 | hsa-miR-7087-5p  |
| LARP1 | hsa-miR-143-5p   |
| LARP1 | hsa-miR-7255-5p  |
| LARP1 | hsa-miR-2450bd   |
| LARP1 | hsa-miR-656      |
| LARP1 | hsa-miR-3544     |
| LARP1 | hsa-miR-7314-3p  |
| LARP1 | hsa-miR-145-5p   |
| LARP1 | hsa-miR-3103-5p  |
| LARP1 | hsa-miR-3607-3p  |
| LARP1 | hsa-miR-7206-3p  |
| LARP1 | hsa-miR-133ab    |
| LARP1 | hsa-miR-4802-5p  |
| LARP1 | hsa-miR-7385a-3p |
| LARP1 | hsa-miR-95-5p    |
| LARP1 | hsa-miR-2368-5p  |
| LARP1 | hsa-miR-105-5p   |
| LARP1 | hsa-miR-1968-3p  |
| LARP1 | hsa-miR-4436b-5p |
| LARP1 | hsa-miR-496      |
| LARP1 | hsa-miR-7177-5p  |
| LARP1 | hsa-miR-7355-5p  |
| LARP1 | hsa-miR-19b-5p   |
| LARP1 | hsa-miR-549a     |
| LARP1 | hsa-miR-1679     |
| LARP1 | hsa-miR-7211-5p  |
| LARP1 | hsa-miR-6843-3p  |
| LARP1 | hsa-miR-7110-5p  |
| LARP1 | hsa-miR-6836-5p  |
| LARP1 | hsa-miR-7652-5p  |
| LARP1 | hsa-miR-6898-3p  |
| LARP1 | hsa-miR-322-5p   |
| LARP1 | hsa-miR-144-3p   |
| LARP1 | hsa-miR-2399-5p  |
| LARP1 | hsa-miR-7319-5p  |
| LARP1 | hsa-miR-7030-3p  |
| LARP1 | hsa-miR-3569     |
| LARP1 | hsa-miR-883b-5p  |
| LARP1 | hsa-miR-6362     |
| LARP1 | hsa-miR-629-3p   |
| LARP1 | hsa-miR-634      |
| LARP1 | hsa-miR-4662b    |

|       |                  |
|-------|------------------|
| LARP1 | hsa-miR-7072-5p  |
| LARP1 | hsa-miR-1814a    |
| LARP1 | hsa-miR-140-5p   |
| LARP1 | hsa-miR-1265     |
| LARP1 | hsa-miR-6384     |
| LARP1 | hsa-miR-138-3p   |
| LARP1 | hsa-miR-210-3p   |
| LARP1 | hsa-miR-8829     |
| LARP1 | hsa-miR-6926-5p  |
| LARP1 | hsa-let-7f-2-3p  |
| LARP1 | hsa-miR-1661     |
| LARP1 | hsa-miR-7688-3p  |
| LARP1 | hsa-miR-7244-5p  |
| LARP1 | hsa-miR-2472     |
| LARP1 | hsa-miR-6946-5p  |
| LARP1 | hsa-miR-6895-3p  |
| LARP1 | hsa-miR-7437-3p  |
| LARP1 | hsa-miR-5197-3p  |
| LARP1 | hsa-let-7abf-3p  |
| LARP1 | hsa-miR-3084-3p  |
| LARP1 | hsa-miR-875      |
| LARP1 | hsa-miR-338-3p   |
| LARP1 | hsa-miR-4270     |
| LARP1 | hsa-miR-6552-3p  |
| LARP1 | hsa-miR-7273-5p  |
| LARP1 | hsa-miR-296-3p   |
| LARP1 | hsa-miR-7056-3p  |
| LARP1 | hsa-miR-707      |
| LARP1 | hsa-miR-628-3p   |
| LARP1 | hsa-miR-7278-3p  |
| LARP1 | hsa-miR-1297     |
| LARP1 | hsa-miR-33-3p    |
| LARP1 | hsa-miR-7208-3p  |
| LARP1 | hsa-miR-5622-5p  |
| LARP1 | hsa-miR-2305     |
| LARP1 | hsa-miR-3934-5p  |
| LARP1 | hsa-miR-8904b    |
| LARP1 | hsa-miR-6964-5p  |
| LARP1 | hsa-miR-2400     |
| LARP1 | hsa-miR-6403     |
| LARP1 | hsa-miR-7166-3p  |
| LARP1 | hsa-miR-7010-5p  |
| LARP1 | hsa-miR-6956-5p  |
| LARP1 | hsa-miR-140-3p.1 |
| LARP1 | hsa-miR-7191-5p  |
| LARP1 | hsa-miR-578      |

|       |                 |
|-------|-----------------|
| LARP1 | hsa-miR-4642    |
| LARP1 | hsa-miR-6891-3p |
| LARP1 | hsa-miR-7028-3p |
| LARP1 | hsa-miR-2394    |
| LARP1 | hsa-miR-6589-5p |
| LARP1 | hsa-miR-371b-5p |
| LARP1 | hsa-miR-3058-3p |
| LARP1 | hsa-miR-3714    |
| LARP1 | hsa-miR-637     |
| LARP1 | hsa-miR-3130-5p |
| LARP1 | hsa-miR-4697-3p |
| LARP1 | hsa-miR-6862-5p |
| LARP1 | hsa-miR-126-5p  |
| LARP1 | hsa-miR-451b    |
| LARP1 | hsa-miR-497-5p  |
| LARP1 | hsa-miR-655-3p  |
| LARP1 | hsa-miR-1722-5p |
| LARP1 | hsa-miR-7467-3p |
| LARP1 | hsa-miR-432-5p  |
| LARP1 | hsa-miR-1225-5p |
| LARP1 | hsa-miR-211-3p  |
| LARP1 | hsa-miR-122     |
| LARP1 | hsa-miR-7652-3p |
| LARP1 | hsa-miR-1252    |
| LARP1 | hsa-miR-6951-5p |
| LARP1 | hsa-miR-6878-5p |
| LARP1 | hsa-miR-8870    |
| LARP1 | hsa-miR-3170    |
| LARP1 | hsa-miR-6815-5p |
| LARP1 | hsa-miR-548ba   |
| LARP1 | hsa-miR-381-3p  |
| LARP1 | hsa-miR-467g    |
| LARP1 | hsa-miR-650     |
| LARP1 | hsa-miR-574-3p  |
| LARP1 | hsa-miR-8888    |
| LARP1 | hsa-miR-3620-3p |
| LARP1 | hsa-miR-541-3p  |
| LARP1 | hsa-miR-299b-5p |
| LARP1 | hsa-miR-8891    |
| LARP1 | hsa-miR-8908e   |
| LARP1 | hsa-miR-7307-5p |
| LARP1 | hsa-miR-4743-3p |
| LARP1 | hsa-miR-369-3p  |
| LARP1 | hsa-miR-222-5p  |
| LARP1 | hsa-miR-6523a   |
| LARP1 | hsa-miR-23a-5p  |



|       |                  |
|-------|------------------|
| LARP1 | hsa-miR-29b-2-5p |
| LARP1 | hsa-miR-6779-5p  |
| LARP1 | hsa-miR-7977     |
| LARP1 | hsa-miR-6909-3p  |
| LARP1 | hsa-miR-6905-5p  |
| LARP1 | hsa-miR-3974     |
| LARP1 | hsa-miR-6355     |
| LARP1 | hsa-miR-8800     |
| LARP1 | hsa-miR-6930-5p  |
| LARP1 | hsa-miR-326      |
| LARP1 | hsa-miR-7053-3p  |
| LARP1 | hsa-miR-3470a    |
| LARP1 | hsa-miR-4448     |
| LARP1 | hsa-miR-219-5p   |
| LARP1 | hsa-miR-6727-3p  |
| LARP1 | hsa-miR-1343-5p  |
| LARP1 | hsa-miR-6878-3p  |
| LARP1 | hsa-miR-1226-3p  |
| LARP1 | hsa-miR-7333-3p  |
| LARP1 | hsa-miR-7200-5p  |
| LARP1 | hsa-miR-7261-5p  |
| LARP1 | hsa-miR-6632-5p  |
| LARP1 | hsa-miR-6704-5p  |
| LARP1 | hsa-miR-3070-3p  |
| LARP1 | hsa-miR-7483-3p  |
| LARP1 | hsa-miR-93-3p    |
| LARP1 | hsa-miR-7372-5p  |
| LARP1 | hsa-miR-4741     |
| LARP1 | hsa-miR-1266     |
| LARP1 | hsa-miR-4518     |
| LARP1 | hsa-miR-4470     |
| LARP1 | hsa-miR-6845-5p  |
| LARP1 | hsa-miR-6987-5p  |
| LARP1 | hsa-miR-454-5p   |
| LARP1 | hsa-miR-3148     |
| LARP1 | hsa-miR-330-3p   |
| LARP1 | hsa-miR-6866-5p  |
| LARP1 | hsa-miR-324      |
| LARP1 | hsa-miR-3584-5p  |
| LARP1 | hsa-miR-4273     |
| LARP1 | hsa-miR-1241     |
| LARP1 | hsa-miR-1930-3p  |
| LARP1 | hsa-miR-4323     |
| LARP1 | hsa-miR-567      |
| LARP1 | hsa-miR-3928-3p  |
| LARP1 | hsa-miR-7481-5p  |

|       |                  |
|-------|------------------|
| LARP1 | hsa-miR-320-5p   |
| LARP1 | hsa-miR-3533     |
| LARP1 | hsa-miR-423-5p   |
| LARP1 | hsa-miR-6596-3p  |
| LARP1 | hsa-miR-7658-3p  |
| LARP1 | hsa-miR-3611     |
| LARP1 | hsa-miR-7277-3p  |
| LARP1 | hsa-miR-8817     |
| LARP1 | hsa-miR-3070-5p  |
| LARP1 | hsa-miR-9-5p     |
| LARP1 | hsa-miR-6949-3p  |
| LARP1 | hsa-miR-92b-5p   |
| LARP1 | hsa-miR-4438     |
| LARP1 | hsa-miR-873-3p   |
| LARP1 | hsa-miR-654-5p   |
| LARP1 | hsa-miR-2389     |
| LARP1 | hsa-miR-3665     |
| LARP1 | hsa-miR-6337     |
| LARP1 | hsa-miR-6791-3p  |
| LARP1 | hsa-miR-4437     |
| LARP1 | hsa-miR-7386i-3p |
| LARP1 | hsa-miR-2323     |
| LARP1 | hsa-miR-4265     |
| LARP1 | hsa-miR-1956-3p  |
| LARP1 | hsa-miR-2464-3p  |
| LARP1 | hsa-miR-1632-3p  |
| LARP1 | hsa-miR-769-3p   |
| LARP1 | hsa-miR-5616-3p  |
| LARP1 | hsa-miR-29b-1-5p |
| LARP1 | hsa-miR-541-3p   |
| LARP1 | hsa-miR-185-5p   |
| LARP1 | hsa-miR-4297     |
| LARP1 | hsa-miR-4530     |
| LARP1 | hsa-miR-743ab-3p |
| LARP1 | hsa-miR-6750-5p  |
| LARP1 | hsa-miR-6688-3p  |
| LARP1 | hsa-miR-371      |
| LARP1 | hsa-miR-7193-5p  |
| LARP1 | hsa-miR-3475-3p  |
| LARP1 | hsa-miR-2449     |
| LARP1 | hsa-miR-222-3p   |
| LARP1 | hsa-miR-4534     |
| LARP1 | hsa-miR-182-5p   |
| LARP1 | hsa-miR-1275     |
| LARP1 | hsa-miR-144-5p   |
| LARP1 | hsa-miR-1781-5p  |

|       |                  |
|-------|------------------|
| LARP1 | hsa-miR-2465     |
| LARP1 | hsa-miR-106-3p   |
| LARP1 | hsa-miR-1762     |
| LARP1 | hsa-miR-4705     |
| LARP1 | hsa-miR-4269     |
| LARP1 | hsa-miR-669bf-3p |
| LARP1 | hsa-miR-4257     |
| LARP1 | hsa-miR-7344-5p  |
| LARP1 | hsa-miR-3622b-5p |
| LARP1 | hsa-miR-30ad-3p  |
| LARP1 | hsa-miR-7260-3p  |
| LARP1 | hsa-miR-6963-3p  |
| LARP1 | hsa-miR-8801     |
| LARP1 | hsa-miR-335-3p   |
| LARP1 | hsa-miR-2881     |
| LARP1 | hsa-miR-1271-5p  |
| LARP1 | hsa-miR-510      |
| LARP1 | hsa-miR-6599-5p  |
| LARP1 | hsa-miR-128-5p   |
| LARP1 | hsa-miR-219b-5p  |
| LARP1 | hsa-miR-6996-5p  |
| LARP1 | hsa-miR-6702-5p  |
| LARP1 | hsa-miR-7259-5p  |
| LARP1 | hsa-miR-7106-3p  |
| LARP1 | hsa-miR-701-5p   |
| LARP1 | hsa-miR-4669     |
| LARP1 | hsa-miR-7113-5p  |
| LARP1 | hsa-miR-1545b-3p |
| LARP1 | hsa-miR-6547-5p  |
| LARP1 | hsa-miR-7-5p     |
| LARP1 | hsa-miR-7214-5p  |
| LARP1 | hsa-let-7afk-3p  |
| LARP1 | hsa-miR-3192-5p  |
| LARP1 | hsa-miR-7386d-5p |
| LARP1 | hsa-miR-3569-3p  |
| LARP1 | hsa-miR-584-3p   |
| LARP1 | hsa-miR-1307-3p  |
| LARP1 | hsa-miR-574-3p   |
| LARP1 | hsa-miR-5089-3p  |
| LARP1 | hsa-miR-382-5p   |
| LARP1 | hsa-miR-3150a-3p |
| LARP1 | hsa-miR-7109-3p  |
| LARP1 | hsa-miR-216c     |
| LARP1 | hsa-miR-8106     |
| LARP1 | hsa-miR-8813     |
| LARP1 | hsa-miR-493-3p   |

|       |                  |
|-------|------------------|
| LARP1 | hsa-miR-92-5p    |
| LARP1 | hsa-miR-34       |
| LARP1 | hsa-miR-6983-3p  |
| LARP1 | hsa-miR-2308     |
| LARP1 | hsa-miR-7398u-3p |
| LARP1 | hsa-miR-1715-5p  |
| LARP1 | hsa-miR-344f-5p  |
| LARP1 | hsa-miR-326-3p   |
| LARP1 | hsa-miR-7004-3p  |
| LARP1 | hsa-miR-6613-3p  |
| LARP1 | hsa-miR-7669-3p  |
| LARP1 | hsa-miR-8823     |
| LARP1 | hsa-miR-5680     |
| LARP1 | hsa-miR-33a-3p   |
| LARP1 | hsa-miR-1193-3p  |
| LARP1 | hsa-miR-6823-5p  |
| LARP1 | hsa-miR-6333     |
| LARP1 | hsa-miR-135b-3p  |
| LARP1 | hsa-miR-6772-3p  |
| LARP1 | hsa-miR-875-5p   |
| LARP1 | hsa-miR-1550-5p  |
| LARP1 | hsa-miR-6594-5p  |
| LARP1 | hsa-miR-1966-5p  |
| LARP1 | hsa-miR-525-5p   |
| LARP1 | hsa-miR-4796-3p  |
| LARP1 | hsa-miR-4268     |
| LARP1 | hsa-miR-632      |
| LARP1 | hsa-miR-516b-3p  |
| LARP1 | hsa-miR-2285u    |
| LARP1 | hsa-miR-135-5p   |
| LARP1 | hsa-miR-516-5p   |
| LARP1 | hsa-miR-153-3p   |
| LARP1 | hsa-miR-7164-5p  |
| LARP1 | hsa-miR-2346     |
| LARP1 | hsa-let-7-3p     |
| LARP1 | hsa-miR-133-3p   |
| LARP1 | hsa-miR-1685-5p  |
| LARP1 | hsa-miR-7048-5p  |
| LARP1 | hsa-miR-684      |
| LARP1 | hsa-miR-328-3p   |
| LARP1 | hsa-miR-505-5p   |
| LARP1 | hsa-miR-7353-5p  |
| LARP1 | hsa-miR-6814-5p  |
| LARP1 | hsa-miR-1224-3p  |
| LARP1 | hsa-miR-133c     |
| LARP1 | hsa-miR-373-5p   |

|       |                    |
|-------|--------------------|
| LARP1 | hsa-miR-940        |
| LARP1 | hsa-miR-7016-3p    |
| LARP1 | hsa-miR-1258       |
| LARP1 | hsa-miR-1609       |
| LARP1 | hsa-miR-7297-5p    |
| LARP1 | hsa-miR-691        |
| LARP1 | hsa-miR-4656       |
| LARP1 | hsa-miR-1912-5p    |
| LARP1 | hsa-miR-3547       |
| LARP1 | hsa-miR-2355-3p    |
| LARP1 | hsa-miR-147-5p     |
| LARP1 | hsa-miR-1972       |
| LARP1 | hsa-miR-1225-3p    |
| LARP1 | hsa-miR-1739       |
| LARP1 | hsa-miR-7094b-2-5p |
| LARP1 | hsa-miR-141-5p     |
| LARP1 | hsa-miR-98-5p      |
| LARP1 | hsa-miR-6357       |
| LARP1 | hsa-miR-3918       |
| LARP1 | hsa-miR-7452-5p    |
| LARP1 | hsa-miR-6764-5p    |
| LARP1 | hsa-miR-3104-5p    |
| LARP1 | hsa-miR-624-3p     |
| LARP1 | hsa-miR-3177-5p    |
| LARP1 | hsa-miR-3616-3p    |
| LARP1 | hsa-miR-6971-3p    |
| LARP1 | hsa-miR-1677-3p    |
| LARP1 | hsa-miR-4699-5p    |
| LARP1 | hsa-miR-5589-5p    |
| LARP1 | hsa-miR-7378-5p    |
| LARP1 | hsa-miR-2415-3p    |
| LARP1 | hsa-miR-3594-5p    |
| LARP1 | hsa-miR-6910-3p    |
| LARP1 | hsa-miR-7662-5p    |
| LARP1 | hsa-miR-4647       |
| LARP1 | hsa-miR-2896       |
| LARP1 | hsa-miR-4533       |
| LARP1 | hsa-miR-7265-3p    |
| LARP1 | hsa-miR-6509-3p    |
| LARP1 | hsa-miR-5132-5p    |
| LARP1 | hsa-miR-30c-2-3p   |
| LARP1 | hsa-miR-198        |
| LARP1 | hsa-miR-575        |
| LARP1 | hsa-miR-4680-5p    |
| LARP1 | hsa-miR-4759       |
| LARP1 | hsa-miR-708-3p     |

|       |                   |
|-------|-------------------|
| LARP1 | hsa-miR-6770-5p   |
| LARP1 | hsa-miR-6886-3p   |
| LARP1 | hsa-miR-181-5p    |
| LARP1 | hsa-miR-7260-5p   |
| LARP1 | hsa-miR-194-1-3p  |
| LARP1 | hsa-miR-4675      |
| LARP1 | hsa-miR-2301      |
| LARP1 | hsa-miR-3144-3p   |
| LARP1 | hsa-miR-547-5p    |
| LARP1 | hsa-miR-6656-5p   |
| LARP1 | hsa-miR-7b-3p     |
| LARP1 | hsa-miR-8848      |
| LARP1 | hsa-miR-7073-3p   |
| LARP1 | hsa-miR-6964-3p   |
| LARP1 | hsa-miR-6992-5p   |
| LARP1 | hsa-miR-496a-3p.2 |
| LARP1 | hsa-miR-3926      |
| LARP1 | hsa-miR-2404      |
| LARP1 | hsa-miR-6972-5p   |
| LARP1 | hsa-miR-223-3p    |
| LARP1 | hsa-miR-33        |
| LARP1 | hsa-miR-7656-3p   |
| LARP1 | hsa-miR-1260a     |
| LARP1 | hsa-miR-6554-5p   |
| LARP1 | hsa-miR-4289      |
| LARP1 | hsa-miR-4301      |
| LARP1 | hsa-miR-6927-5p   |
| LARP1 | hsa-miR-7515      |
| LARP1 | hsa-miR-7329-5p   |
| LARP1 | hsa-miR-214-3p    |
| LARP1 | hsa-miR-4709-5p   |
| LARP1 | hsa-miR-485-5p    |
| LARP1 | hsa-miR-2395      |
| LARP1 | hsa-miR-7111-3p   |
| LARP1 | hsa-miR-6719-3p   |
| LARP1 | hsa-miR-143-3p    |
| LARP1 | hsa-miR-7061-5p   |
| LARP1 | hsa-miR-1227-3p   |
| LARP1 | hsa-miR-4519      |
| LARP1 | hsa-miR-7371f-5p  |
| LARP1 | hsa-miR-7356-3p   |
| LARP1 | hsa-miR-4645-5p   |
| LARP1 | hsa-miR-2459      |
| LARP1 | hsa-miR-181d-3p   |
| LARP1 | hsa-miR-7163-3p   |
| LARP1 | hsa-miR-7653-5p   |

|       |                   |
|-------|-------------------|
| LARP1 | hsa-miR-6769b-5p  |
| LARP1 | hsa-miR-646       |
| LARP1 | hsa-miR-2114-3p   |
| LARP1 | hsa-miR-6574-5p   |
| LARP1 | hsa-miR-4687-5p   |
| LARP1 | hsa-miR-6817-3p   |
| LARP1 | hsa-miR-350       |
| LARP1 | hsa-miR-4665-5p   |
| LARP1 | hsa-miR-4736      |
| LARP1 | hsa-miR-7360-5p   |
| LARP1 | hsa-miR-891b      |
| LARP1 | hsa-miR-460-3p    |
| LARP1 | hsa-miR-3578      |
| LARP1 | hsa-miR-204-5p    |
| LARP1 | hsa-miR-3547-5p   |
| LARP1 | hsa-miR-571       |
| LARP1 | hsa-miR-154b      |
| LARP1 | hsa-miR-6769a-5p  |
| LARP1 | hsa-miR-483-3p.1  |
| LARP1 | hsa-miR-6555-5p   |
| LARP1 | hsa-miR-7677-5p   |
| LARP1 | hsa-miR-466b-2-3p |
| LARP1 | hsa-miR-892-5p    |
| LARP1 | hsa-miR-6564-3p   |
| LARP1 | hsa-miR-3074-5p   |
| LARP1 | hsa-miR-6856-3p   |
| LARP1 | hsa-miR-7296-3p   |
| LARP1 | hsa-miR-2970-5p   |
| LARP1 | hsa-miR-3071-3p   |
| LARP1 | hsa-miR-2460      |
| LARP1 | hsa-miR-3577-3p   |
| LARP1 | hsa-miR-6503-3p   |
| LARP1 | hsa-miR-6672-3p   |
| LARP1 | hsa-miR-421-5p    |
| LARP1 | hsa-miR-3070-2-3p |
| LARP1 | hsa-miR-7288-3p   |
| LARP1 | hsa-miR-7055-3p   |
| LARP1 | hsa-miR-7083-5p   |
| LARP1 | hsa-miR-2475      |
| LARP1 | hsa-miR-3119      |
| LARP1 | hsa-miR-5692bc    |
| LARP1 | hsa-miR-1773-3p   |
| LARP1 | hsa-miR-4263      |
| LARP1 | hsa-miR-149-3p    |
| LARP1 | hsa-miR-6619-5p   |
| LARP1 | hsa-miR-194-3p    |

|       |                    |
|-------|--------------------|
| LARP1 | hsa-miR-4774-3p    |
| LARP1 | hsa-miR-515-5p     |
| LARP1 | hsa-miR-320b       |
| LARP1 | hsa-miR-7312-3p    |
| LARP1 | hsa-miR-470-5p     |
| LARP1 | hsa-miR-8097       |
| LARP1 | hsa-miR-3664-5p    |
| LARP1 | hsa-miR-6920-3p    |
| LARP1 | hsa-miR-4472       |
| LARP1 | hsa-miR-375        |
| LARP1 | hsa-miR-7032-5p    |
| LARP1 | hsa-miR-1545a-3p   |
| LARP1 | hsa-miR-2423       |
| LARP1 | hsa-miR-342-3p     |
| LARP1 | hsa-miR-3534       |
| LARP1 | hsa-miR-6079       |
| LARP1 | hsa-miR-4459       |
| LARP1 | hsa-miR-2373-3p    |
| LARP1 | hsa-miR-2433       |
| LARP1 | hsa-miR-30d-5p     |
| LARP1 | hsa-miR-920        |
| LARP1 | hsa-miR-4712-3p    |
| LARP1 | hsa-miR-18-3p      |
| LARP1 | hsa-miR-3177-3p    |
| LARP1 | hsa-miR-6332       |
| LARP1 | hsa-miR-139-3p     |
| LARP1 | hsa-miR-486-3p     |
| LARP1 | hsa-miR-1188-3p    |
| LARP1 | hsa-miR-4512       |
| LARP1 | hsa-miR-3092-5p    |
| LARP1 | hsa-miR-549a       |
| LARP1 | hsa-miR-2284aa     |
| LARP1 | hsa-miR-4700-3p    |
| LARP1 | hsa-miR-6829-5p    |
| LARP1 | hsa-miR-1198-3p    |
| LARP1 | hsa-miR-6793-3p    |
| LARP1 | hsa-miR-1721       |
| LARP1 | hsa-miR-293-3p     |
| LARP1 | hsa-miR-1969       |
| LARP1 | hsa-miR-1545b-3-3p |
| LARP1 | hsa-miR-4723-5p    |
| LARP1 | hsa-miR-1292-5p    |
| LARP1 | hsa-let-7a-3p      |
| LARP1 | hsa-miR-5627-5p    |
| LARP1 | hsa-miR-6756-3p    |
| LARP1 | hsa-miR-450a-2-3p  |



|       |                  |
|-------|------------------|
| LARP1 | hsa-miR-1237-3p  |
| LARP1 | hsa-miR-5586-3p  |
| LARP1 | hsa-miR-371-3p   |
| LARP1 | hsa-miR-873-5p.1 |
| LARP1 | hsa-miR-502-5p   |
| LARP1 | hsa-miR-660-3p   |
| LARP1 | hsa-miR-329-3p   |
| LARP1 | hsa-miR-7366-5p  |
| LARP1 | hsa-miR-4417     |
| LARP1 | hsa-miR-1789     |
| LARP1 | hsa-miR-7669-5p  |
| LARP1 | hsa-miR-1607     |
| LARP1 | hsa-miR-22-3p    |
| LARP1 | hsa-miR-497-3p   |
| LARP1 | hsa-miR-196-3p   |
| LARP1 | hsa-miR-2439-5p  |
| LARP1 | hsa-miR-7262b-5p |
| LARP1 | hsa-miR-3104-3p  |
| LARP1 | hsa-miR-374c-5p  |
| LARP1 | hsa-miR-1289     |
| LARP1 | hsa-miR-3978     |
| LARP1 | hsa-miR-6123     |
| LARP1 | hsa-miR-466n-5p  |
| LARP1 | hsa-miR-2428     |
| LARP1 | hsa-miR-154-5p   |
| LARP1 | hsa-miR-510-5p   |
| LARP1 | hsa-miR-2438     |
| LARP1 | hsa-miR-3120-3p  |
| LARP1 | hsa-miR-7386o-3p |
| LARP1 | hsa-miR-1782     |
| LARP1 | hsa-miR-503-5p   |
| LARP1 | hsa-miR-1207-3p  |
| LARP1 | hsa-miR-8836     |
| LARP1 | hsa-miR-5004-5p  |
| LARP1 | hsa-miR-4721     |
| LARP1 | hsa-miR-6858-3p  |
| LARP1 | hsa-miR-674-5p   |
| LARP1 | hsa-miR-6784-3p  |
| LARP1 | hsa-miR-6895-5p  |
| LARP1 | hsa-miR-1298-3p  |
| LARP1 | hsa-miR-3667-3p  |
| LARP1 | hsa-miR-4716     |
| LARP1 | hsa-miR-4259     |
| LARP1 | hsa-miR-10a-3p   |
| LARP1 | hsa-miR-6528     |
| LARP1 | hsa-miR-6875-3p  |

|       |                  |
|-------|------------------|
| LARP1 | hsa-miR-7371a-3p |
| LARP1 | hsa-miR-146-5p   |
| LARP1 | hsa-miR-361-3p   |
| LARP1 | hsa-miR-6754-3p  |
| LARP1 | hsa-miR-190a-3p  |
| LARP1 | hsa-miR-455-3p.1 |
| LARP1 | hsa-miR-6331     |
| LARP1 | hsa-miR-2417     |
| LARP1 | hsa-miR-3561-3p  |
| LARP1 | hsa-miR-4455     |
| LARP1 | hsa-miR-1260a    |
| LARP1 | hsa-miR-880-5p   |
| LARP1 | hsa-miR-7067-5p  |
| LARP1 | hsa-let-7g-3p    |
| LARP1 | hsa-miR-2397-3p  |
| LARP1 | hsa-miR-4761-5p  |
| LARP1 | hsa-miR-5192     |
| LARP1 | hsa-miR-5695     |
| LARP1 | hsa-miR-4725-3p  |
| LARP1 | hsa-miR-328-5p   |
| LARP1 | hsa-miR-3162-5p  |
| LARP1 | hsa-miR-3189-5p  |
| LARP1 | hsa-miR-1292-5p  |
| LARP1 | hsa-miR-8819     |
| LARP1 | hsa-miR-6824-3p  |
| LARP1 | hsa-miR-350-3p   |
| LARP1 | hsa-miR-6827-5p  |
| LARP1 | hsa-miR-2480     |
| LARP1 | hsa-miR-7646-5p  |
| LARP1 | hsa-miR-2284x    |
| LARP1 | hsa-miR-6787-3p  |
| LARP1 | hsa-miR-6975-5p  |
| LARP1 | hsa-miR-340-5p   |
| LARP1 | hsa-miR-494      |
| LARP1 | hsa-miR-30a-5p   |
| LARP1 | hsa-miR-4762-3p  |
| LARP1 | hsa-miR-7685-5p  |
| LARP1 | hsa-miR-5113     |
| LARP1 | hsa-miR-6774-5p  |
| LARP1 | hsa-miR-3078-3p  |
| LARP1 | hsa-miR-455-3p.2 |
| LARP1 | hsa-miR-889-5p   |
| LARP1 | hsa-miR-7212-5p  |
| LARP1 | hsa-miR-7311-5p  |
| LARP1 | hsa-miR-323-3p   |
| LARP1 | hsa-miR-8886     |

|       |                  |
|-------|------------------|
| LARP1 | hsa-miR-3942-3p  |
| LARP1 | hsa-miR-7254-5p  |
| LARP1 | hsa-miR-7005-5p  |
| LARP1 | hsa-miR-542-3p   |
| LARP1 | hsa-miR-4486     |
| LARP1 | hsa-miR-598-5p   |
| LARP1 | hsa-miR-3121-5p  |
| LARP1 | hsa-miR-330-3p.2 |
| LARP1 | hsa-miR-485      |
| LARP1 | hsa-miR-153-5p   |
| LARP1 | hsa-miR-2451     |
| LARP1 | hsa-miR-1946b    |
| LARP1 | hsa-miR-5572     |
| LARP1 | hsa-miR-101-3p.1 |
| LARP1 | hsa-miR-3154     |
| LARP1 | hsa-miR-345-5p   |
| LARP1 | hsa-miR-761      |
| LARP1 | hsa-miR-8876     |
| LARP1 | hsa-miR-6911-5p  |
| LARP1 | hsa-miR-7272-3p  |
| LARP1 | hsa-miR-1296-3p  |
| LARP1 | hsa-miR-1644     |
| LARP1 | hsa-miR-2374     |
| LARP1 | hsa-miR-7256-3p  |
| LARP1 | hsa-miR-7647-3p  |
| LARP1 | hsa-miR-7315-3p  |
| LARP1 | hsa-miR-514a-3p  |
| LARP1 | hsa-miR-7683-3p  |
| LARP1 | hsa-miR-519e-3p  |
| LARP1 | hsa-miR-2381     |
| LARP1 | hsa-miR-7252-3p  |
| LARP1 | hsa-miR-6754-5p  |
| LARP1 | hsa-miR-6368     |
| LARP1 | hsa-miR-7090-5p  |
| LARP1 | hsa-miR-7198-3p  |
| LARP1 | hsa-miR-6700-5p  |
| LARP1 | hsa-miR-6597-3p  |
| LARP1 | hsa-miR-1843b-5p |
| LARP1 | hsa-miR-4433b-5p |
| LARP1 | hsa-miR-1260b    |
| LARP1 | hsa-miR-3191-3p  |
| LARP1 | hsa-miR-5101     |
| LARP1 | hsa-miR-4481     |
| LARP1 | hsa-miR-6733-3p  |
| LARP1 | hsa-miR-7291-5p  |
| LARP1 | hsa-miR-802      |

|       |                   |
|-------|-------------------|
| LARP1 | hsa-miR-1779      |
| LARP1 | hsa-miR-329a      |
| LARP1 | hsa-miR-7370-3p   |
| LARP1 | hsa-miR-7476-3p   |
| LARP1 | hsa-miR-3062-3p   |
| LARP1 | hsa-miR-6646-3p   |
| LARP1 | hsa-miR-6753-5p   |
| LARP1 | hsa-miR-7094-1-5p |
| LARP1 | hsa-miR-7032-3p   |
| LARP1 | hsa-miR-10-5p     |
| LARP1 | hsa-miR-182-5p    |
| LARP1 | hsa-miR-4716-5p   |
| LARP1 | hsa-miR-25-3p     |
| LARP1 | hsa-miR-2891      |
| LARP1 | hsa-miR-26a-5p    |
| LARP1 | hsa-miR-512       |
| LARP1 | hsa-miR-4422      |
| LARP1 | hsa-miR-1540      |
| LARP1 | hsa-miR-664b-5p   |
| LARP1 | hsa-miR-4659b-3p  |
| LARP1 | hsa-miR-3191-5p   |
| LARP1 | hsa-miR-3193      |
| LARP1 | hsa-miR-7398g-3p  |
| LARP1 | hsa-miR-642       |
| LARP1 | hsa-miR-3075      |
| LARP1 | hsa-miR-661       |
| LARP1 | hsa-miR-7083-3p   |
| LARP1 | hsa-miR-3473      |
| LARP1 | hsa-miR-1197      |
| LARP1 | hsa-miR-6785-5p   |
| LARP1 | hsa-miR-2117      |
| LARP1 | hsa-miR-3151-5p   |
| LARP1 | hsa-miR-524-3p    |
| LARP1 | hsa-miR-6729-3p   |
| LARP1 | hsa-miR-3614-3p   |
| LARP1 | hsa-miR-1586      |
| LARP1 | hsa-miR-741-3p    |
| LARP1 | hsa-miR-4434      |
| LARP1 | hsa-miR-24-5p     |
| LARP1 | hsa-miR-322-3p    |
| LARP1 | hsa-miR-2286      |
| LARP1 | hsa-miR-4727-5p   |
| LARP1 | hsa-miR-709       |
| LARP1 | hsa-let-7f-1-3p   |
| LARP1 | hsa-miR-7109-5p   |
| LARP1 | hsa-miR-3617-3p   |

|       |                 |
|-------|-----------------|
| LARP1 | hsa-miR-7332-3p |
| LARP1 | hsa-miR-484     |
| LARP1 | hsa-miR-1943-3p |
| LARP1 | hsa-miR-7090-3p |
| LARP1 | hsa-miR-6801-5p |
| LARP1 | hsa-miR-7084-3p |
| LARP1 | hsa-miR-1625-5p |
| LARP1 | hsa-miR-16-5p   |
| LARP1 | hsa-miR-1231-5p |
| LARP1 | hsa-miR-370-3p  |
| LARP1 | hsa-miR-2293    |
| LARP1 | hsa-miR-4795-5p |
| LARP1 | hsa-miR-1748    |
| LARP1 | hsa-miR-6938-5p |
| LARP1 | hsa-miR-8108    |
| LARP1 | hsa-miR-6922-3p |
| LARP1 | hsa-miR-1205    |
| LARP1 | hsa-miR-5584-5p |
| LARP1 | hsa-miR-301-3p  |
| LARP1 | hsa-miR-23-3p   |
| LARP1 | hsa-miR-8887    |
| LARP1 | hsa-miR-6819-3p |
| LARP1 | hsa-miR-7210-5p |
| LARP1 | hsa-miR-6575-5p |
| LARP1 | hsa-miR-6840-3p |
| LARP1 | hsa-miR-604     |
| LARP1 | hsa-miR-6969-5p |
| LARP1 | hsa-miR-344-3p  |
| LARP1 | hsa-miR-541-5p  |
| LARP1 | hsa-miR-2486-3p |
| LARP1 | hsa-miR-3664-5p |
| LARP1 | hsa-miR-6549-5p |
| LARP1 | hsa-miR-6864-5p |
| LARP1 | hsa-miR-6824-5p |
| LARP1 | hsa-miR-6662-3p |
| LARP1 | hsa-miR-6950-5p |
| LARP1 | hsa-miR-507b    |
| LARP1 | hsa-miR-1896    |
| LARP1 | hsa-miR-8061    |
| LARP1 | hsa-miR-514-3p  |
| LARP1 | hsa-miR-471-3p  |
| LARP1 | hsa-miR-581     |
| LARP1 | hsa-miR-2376    |
| LARP1 | hsa-miR-7353-3p |
| LARP1 | hsa-miR-6950-3p |
| LARP1 | hsa-miR-4714-5p |

|       |                   |
|-------|-------------------|
| LARP1 | hsa-miR-2285n     |
| LARP1 | hsa-miR-7036b-3p  |
| LARP1 | hsa-miR-450a-1-3p |
| LARP1 | hsa-miR-23b-5p    |
| LARP1 | hsa-miR-4724-3p   |
| LARP1 | hsa-miR-197-3p    |
| LARP1 | hsa-miR-6782-3p   |
| LARP1 | hsa-miR-92        |
| LARP1 | hsa-miR-4668-5p   |
| LARP1 | hsa-miR-1284      |
| LARP1 | hsa-miR-2291      |
| LARP1 | hsa-miR-6747-5p   |
| LARP1 | hsa-miR-3152-3p   |
| LARP1 | hsa-miR-2284ac    |
| LARP1 | hsa-miR-3173-3p   |
| LARP1 | hsa-miR-1694      |
| LARP1 | hsa-miR-539-3p    |
| LARP1 | hsa-miR-3093-5p   |
| LARP1 | hsa-miR-6830-5p   |
| LARP1 | hsa-miR-584-5p    |
| LARP1 | hsa-miR-491-5p    |
| LARP1 | hsa-miR-3127-5p   |
| LARP1 | hsa-miR-7648-3p   |
| LARP1 | hsa-miR-3150b-3p  |
| LARP1 | hsa-miR-758-3p    |
| LARP1 | hsa-miR-3529-5p   |
| LARP1 | hsa-miR-212-5p    |
| LARP1 | hsa-miR-6883-5p   |
| LARP1 | hsa-miR-1646      |
| LARP1 | hsa-miR-7188-5p   |
| LARP1 | hsa-miR-1636      |
| LARP1 | hsa-miR-130-3p    |
| LARP1 | hsa-miR-30d-3p    |
| LARP1 | hsa-miR-3100-3p   |
| LARP1 | hsa-miR-3544-3p   |
| LARP1 | hsa-miR-680       |
| LARP1 | hsa-miR-1252-5p   |
| LARP1 | hsa-miR-125a-3p   |
| LARP1 | hsa-miR-501-5p    |
| LARP1 | hsa-miR-6742-5p   |
| LARP1 | hsa-miR-7665-5p   |
| LARP1 | hsa-miR-5584-3p   |
| LARP1 | hsa-miR-130b-5p   |
| LARP1 | hsa-miR-1298      |
| LARP1 | hsa-miR-1306-5p   |
| LARP1 | hsa-miR-4687-3p   |

|       |                  |
|-------|------------------|
| LARP1 | hsa-miR-7002-5p  |
| LARP1 | hsa-miR-7113-3p  |
| LARP1 | hsa-miR-34b-3p   |
| LARP1 | hsa-miR-126-3p   |
| LARP1 | hsa-miR-2297     |
| LARP1 | hsa-miR-411b     |
| LARP1 | hsa-miR-3059-5p  |
| LARP1 | hsa-miR-3152-5p  |
| LARP1 | hsa-miR-1668     |
| LARP1 | hsa-miR-6563-3p  |
| LARP1 | hsa-miR-6929-5p  |
| LARP1 | hsa-miR-513a-5p  |
| LARP1 | hsa-miR-6615-5p  |
| LARP1 | hsa-miR-2294     |
| LARP1 | hsa-miR-6976-5p  |
| LARP1 | hsa-miR-6119-5p  |
| LARP1 | hsa-miR-141-3p   |
| LARP1 | hsa-miR-1273h-3p |
| LARP1 | hsa-miR-7864     |
| LARP1 | hsa-miR-6348     |
| LARP1 | hsa-miR-1544-3p  |
| LARP1 | hsa-miR-3124-3p  |
| LARP1 | hsa-miR-2356     |
| LARP1 | hsa-miR-126a-5p  |
| LARP1 | hsa-miR-669b-5p  |
| LARP1 | hsa-miR-33b-3p   |
| LARP1 | hsa-miR-3076-5p  |
| LARP1 | hsa-miR-702-5p   |
| LARP1 | hsa-miR-3620-5p  |
| LARP1 | hsa-miR-7092-5p  |
| LARP1 | hsa-miR-3550     |
| LARP1 | hsa-miR-1285-3p  |
| LARP1 | hsa-miR-3907     |
| LARP1 | hsa-miR-483-3p   |
| LARP1 | hsa-miR-548ag    |
| LARP1 | hsa-miR-7055-5p  |
| LARP1 | hsa-miR-875-3p   |
| LARP1 | hsa-miR-8792     |
| LARP1 | hsa-miR-4426     |
| LARP1 | hsa-miR-3062-5p  |
| LARP1 | hsa-miR-6764-3p  |
| LARP1 | hsa-miR-1837     |
| LARP1 | hsa-miR-563      |
| LARP1 | hsa-miR-133      |
| LARP1 | hsa-miR-6877-3p  |
| LARP1 | hsa-miR-1843a-5p |

|       |                   |
|-------|-------------------|
| LARP1 | hsa-miR-1233-3p   |
| LARP1 | hsa-miR-8113      |
| LARP1 | hsa-miR-672-3p    |
| LARP1 | hsa-miR-3672      |
| LARP1 | hsa-miR-3075-5p   |
| LARP1 | hsa-miR-1906      |
| LARP1 | hsa-miR-7030-5p   |
| LARP1 | hsa-miR-4505      |
| LARP1 | hsa-miR-548ar-3p  |
| LARP1 | hsa-miR-3668      |
| LARP1 | hsa-miR-1772-3p   |
| LARP1 | hsa-miR-642a-5p   |
| LARP1 | hsa-miR-7649-5p   |
| LARP1 | hsa-miR-3541      |
| LARP1 | hsa-miR-7195-5p   |
| LARP1 | hsa-miR-8903      |
| LARP1 | hsa-miR-6731-5p   |
| LARP1 | hsa-miR-656-3p    |
| LARP1 | hsa-miR-5615-5p   |
| LARP1 | hsa-miR-615-5p    |
| LARP1 | hsa-miR-190-3p    |
| LARP1 | hsa-miR-698-5p    |
| LARP1 | hsa-miR-3084bc-5p |
| LARP1 | hsa-miR-6650-5p   |
| LARP1 | hsa-miR-188-5p    |
| LARP1 | hsa-miR-150-5p    |
| LARP1 | hsa-miR-409       |
| LARP1 | hsa-miR-7157-5p   |
| LARP1 | hsa-miR-7398s-5p  |
| LARP1 | hsa-miR-2338      |
| LARP1 | hsa-miR-6519      |
| LARP1 | hsa-miR-7033-5p   |
| LARP1 | hsa-miR-6780b-5p  |
| LARP1 | hsa-miR-6701-3p   |
| LARP1 | hsa-miR-106-5p    |
| LARP1 | hsa-miR-1897-3p   |
| LARP1 | hsa-miR-6330      |
| LARP1 | hsa-miR-584-5p    |
| LARP1 | hsa-miR-6914-5p   |
| LARP1 | hsa-miR-2300-3p   |
| LARP1 | hsa-miR-2310      |
| LARP1 | hsa-miR-107-5p    |
| LARP1 | hsa-miR-7349-5p   |
| LARP1 | hsa-miR-153       |
| LARP1 | hsa-miR-599       |
| LARP1 | hsa-miR-3688-3p   |



|       |                  |
|-------|------------------|
| LARP1 | hsa-miR-6782-5p  |
| LARP1 | hsa-miR-7034-3p  |
| LARP1 | hsa-miR-6559-5p  |
| LARP1 | hsa-miR-374a-5p  |
| LARP1 | hsa-miR-127-5p   |
| LARP1 | hsa-miR-2327     |
| LARP1 | hsa-miR-7322-5p  |
| LARP1 | hsa-miR-5134-5p  |
| LARP1 | hsa-miR-324-3p   |
| LARP1 | hsa-miR-362-3p   |
| LARP1 | hsa-miR-939-5p   |
| LARP1 | hsa-miR-7235-5p  |
| LARP1 | hsa-miR-2328-5p  |
| LARP1 | hsa-miR-4443     |
| LARP1 | hsa-miR-631      |
| LARP1 | hsa-miR-6799-5p  |
| LARP1 | hsa-miR-29-3p    |
| LARP1 | hsa-miR-4446     |
| LARP1 | hsa-miR-9b-3p    |
| LARP1 | hsa-miR-8899     |
| LARP1 | hsa-miR-4720-5p  |
| LARP1 | hsa-miR-6776-3p  |
| LARP1 | hsa-miR-7292-5p  |
| LARP1 | hsa-miR-6942-5p  |
| LARP1 | hsa-miR-6897-3p  |
| LARP1 | hsa-miR-489      |
| LARP1 | hsa-miR-141-3p   |
| LARP1 | hsa-miR-136-3p   |
| LARP1 | hsa-miR-1285-5p  |
| LARP1 | hsa-miR-449b-3p  |
| LARP1 | hsa-miR-1584-5p  |
| LARP1 | hsa-miR-5003-5p  |
| LARP1 | hsa-miR-7116-3p  |
| LARP1 | hsa-miR-1640     |
| LARP1 | hsa-miR-7049-5p  |
| LARP1 | hsa-miR-384      |
| LARP1 | hsa-miR-6086     |
| LARP1 | hsa-miR-7169-5p  |
| LARP1 | hsa-miR-3162-3p  |
| LARP1 | hsa-miR-200a-3p  |
| LARP1 | hsa-miR-1224     |
| LARP1 | hsa-miR-6690-5p  |
| LARP1 | hsa-miR-101-3p.2 |
| LARP1 | hsa-miR-7304-3p  |
| LARP1 | hsa-miR-3551-3p  |
| LARP1 | hsa-miR-5191     |

|       |                 |
|-------|-----------------|
| LARP1 | hsa-miR-548g-3p |
| LARP1 | hsa-miR-6715-3p |
| LARP1 | hsa-miR-4494    |
| LARP1 | hsa-miR-7378-3p |
| LARP1 | hsa-miR-365-3p  |
| LARP1 | hsa-miR-8082    |
| LARP1 | hsa-miR-5110    |
| LARP1 | hsa-miR-4311    |
| LARP1 | hsa-miR-7075-5p |
| LARP1 | hsa-miR-7844-5p |
| LARP1 | hsa-miR-3557-3p |
| LARP1 | hsa-miR-296-5p  |
| LARP1 | hsa-miR-3102-5p |
| LARP1 | hsa-miR-6620-5p |
| LARP1 | hsa-miR-1306-3p |
| LARP1 | hsa-miR-503-3p  |
| LARP1 | hsa-miR-1254    |
| LARP1 | hsa-miR-1803    |
| LARP1 | hsa-miR-7226-5p |
| LARP1 | hsa-miR-3127-5p |
| LARP1 | hsa-miR-3920    |
| LARP1 | hsa-miR-26-1-3p |
| LARP1 | hsa-miR-1656    |
| LARP1 | hsa-miR-1788-5p |
| LARP1 | hsa-miR-6768-5p |
| LARP1 | hsa-miR-692     |
| LARP1 | hsa-miR-374b-5p |
| LARP1 | hsa-miR-669m-5p |
| LARP1 | hsa-miR-3618-5p |
| LARP1 | hsa-miR-211-5p  |
| LARP1 | hsa-miR-140-3p  |
| LARP1 | hsa-miR-6739-5p |
| LARP1 | hsa-miR-1546-5p |
| LARP1 | hsa-miR-377-5p  |
| LARP1 | hsa-miR-532-3p  |
| LARP1 | hsa-miR-7045-3p |
| LARP1 | hsa-miR-7293-5p |
| LARP1 | hsa-miR-7862    |
| LARP1 | hsa-miR-5112    |
| LARP1 | hsa-miR-4685-5p |
| LARP1 | hsa-miR-1695    |
| LARP1 | hsa-miR-2467-5p |
| LARP1 | hsa-miR-200-3p  |
| LARP1 | hsa-miR-6998-5p |
| LARP1 | hsa-miR-3964    |
| LARP1 | hsa-miR-299-3p  |

|       |                      |
|-------|----------------------|
| LARP1 | hsa-miR-1729-5p      |
| LARP1 | hsa-miR-101-3p       |
| LARP1 | hsa-miR-3175         |
| LARP1 | hsa-miR-2127         |
| LARP1 | hsa-miR-2382-5p      |
| LARP1 | hsa-miR-3572-5p      |
| LARP1 | hsa-miR-1603         |
| LARP1 | hsa-miR-3102-5p.2-5p |
| LARP1 | hsa-miR-342-5p       |
| LARP1 | hsa-miR-934-3p       |
| LARP1 | hsa-miR-7166-5p      |
| LARP1 | hsa-miR-4271         |
| LARP1 | hsa-miR-1287-5p      |
| LARP1 | hsa-miR-32-5p        |
| LARP1 | hsa-miR-7316-3p      |
| LARP1 | hsa-miR-3551-5p      |
| LARP1 | hsa-miR-4731-5p      |
| LARP1 | hsa-miR-4650         |
| LARP1 | hsa-miR-6848-3p      |
| LARP1 | hsa-miR-6747-3p      |
| LARP1 | hsa-miR-326-5p       |
| LARP1 | hsa-miR-6899-3p      |
| LARP1 | hsa-miR-760          |
| LARP1 | hsa-miR-669c-3p      |
| LARP1 | hsa-miR-151a-5p      |
| LARP1 | hsa-miR-291b-3p      |
| LARP1 | hsa-miR-3158-5p      |
| LARP1 | hsa-miR-2136         |
| LARP1 | hsa-miR-4716-3p      |
| LARP1 | hsa-miR-376b-5p      |
| LARP1 | hsa-miR-540-3p       |
| LARP1 | hsa-miR-7162-5p      |
| LARP1 | hsa-miR-1686         |
| LARP1 | hsa-miR-3127-3p      |
| LARP1 | hsa-miR-7445-3p      |
| LARP1 | hsa-miR-3149         |
| LARP1 | hsa-miR-5583-3p      |
| LARP1 | hsa-miR-129b-5p      |
| LARP1 | hsa-miR-7091-3p      |
| LARP1 | hsa-miR-6985-5p      |
| LARP1 | hsa-miR-6581-3p      |
| LARP1 | hsa-miR-7215-3p      |
| LARP1 | hsa-miR-7058-5p      |
| LARP1 | hsa-miR-2454-5p      |
| LARP1 | hsa-miR-466n-3p      |
| LARP1 | hsa-miR-570-5p       |

|       |                  |
|-------|------------------|
| LARP1 | hsa-miR-7210-3p  |
| LARP1 | hsa-miR-548e-5p  |
| LARP1 | hsa-miR-6923-5p  |
| LARP1 | hsa-miR-1845     |
| LARP1 | hsa-miR-4760-3p  |
| LARP1 | hsa-miR-5194     |
| LARP1 | hsa-miR-7025-3p  |
| LARP1 | hsa-miR-6801-3p  |
| LARP1 | hsa-miR-5582-5p  |
| LARP1 | hsa-miR-6756-5p  |
| LARP1 | hsa-miR-6775-3p  |
| LARP1 | hsa-miR-146b-3p  |
| LARP1 | hsa-miR-10b-3p   |
| LARP1 | hsa-miR-302c-5p  |
| LARP1 | hsa-miR-3086-3p  |
| LARP1 | hsa-miR-2887     |
| LARP1 | hsa-miR-2337     |
| LARP1 | hsa-miR-323a-5p  |
| LARP1 | hsa-miR-8896     |
| LARP1 | hsa-miR-7309-5p  |
| LARP1 | hsa-miR-3612     |
| LARP1 | hsa-miR-219-1-3p |
| LARP1 | hsa-miR-7033-3p  |
| LARP1 | hsa-miR-1227-5p  |
| LARP1 | hsa-miR-1962     |
| LARP1 | hsa-miR-654-3p   |
| LARP1 | hsa-miR-6566-3p  |
| LARP1 | hsa-miR-6733-5p  |
| LARP1 | hsa-miR-7106-5p  |
| LARP1 | hsa-miR-298      |
| LARP1 | hsa-miR-34a-3p   |
| LARP1 | hsa-miR-1343-3p  |
| LARP1 | hsa-miR-129b-3p  |
| LARP1 | hsa-miR-7011-5p  |
| LARP1 | hsa-miR-1543     |
| LARP1 | hsa-miR-466f-3p  |
| LARP1 | hsa-miR-767      |
| LARP1 | hsa-miR-1956-5p  |
| LARP1 | hsa-miR-519d-5p  |
| LARP1 | hsa-miR-7682-3p  |
| LARP1 | hsa-miR-3431     |
| LARP1 | hsa-miR-7386f-3p |
| LARP1 | hsa-miR-1563     |
| LARP1 | hsa-miR-3202     |
| LARP1 | hsa-miR-3185     |
| LARP1 | hsa-miR-7373b-3p |

|       |                   |
|-------|-------------------|
| LARP1 | hsa-miR-4694-5p   |
| LARP1 | hsa-miR-7327-5p   |
| LARP1 | hsa-miR-5196-5p   |
| LARP1 | hsa-miR-6734-3p   |
| LARP1 | hsa-miR-26b-5p    |
| LARP1 | hsa-miR-7217-3p   |
| LARP1 | hsa-miR-2110      |
| LARP1 | hsa-miR-547-3p    |
| LARP1 | hsa-miR-3144-5p   |
| LARP1 | hsa-miR-3573-5p   |
| LARP1 | hsa-miR-30-3p     |
| LARP1 | hsa-miR-7226-3p   |
| LARP1 | hsa-miR-3151      |
| LARP1 | hsa-miR-7063-5p   |
| LARP1 | hsa-miR-6595-5p   |
| LARP1 | hsa-miR-3474      |
| LARP1 | hsa-miR-3652      |
| LARP1 | hsa-miR-4531      |
| LARP1 | hsa-miR-1245b-3p  |
| LARP1 | hsa-miR-27-3p     |
| LARP1 | hsa-miR-101b-3p.2 |
| LARP1 | hsa-miR-4769-3p   |
| LARP1 | hsa-miR-3179      |
| LARP1 | hsa-miR-4515      |
| LARP1 | hsa-miR-15a-3p    |
| LARP1 | hsa-miR-1771      |
| LARP1 | hsa-miR-4651      |
| LARP1 | hsa-miR-4482-5p   |
| LARP1 | hsa-miR-3616-5p   |
| LARP1 | hsa-miR-1964-5p   |
| LARP1 | hsa-miR-6792-5p   |
| LARP1 | hsa-miR-2339      |
| LARP1 | hsa-miR-8104      |
| LARP1 | hsa-miR-1753      |
| LARP1 | hsa-miR-6520      |
| LARP1 | hsa-miR-7398b-3p  |
| LARP1 | hsa-miR-5108      |
| LARP1 | hsa-miR-4677-3p   |
| LARP1 | hsa-miR-7112-5p   |
| LARP1 | hsa-miR-512-3p    |
| LARP1 | hsa-miR-657       |
| LARP1 | hsa-miR-4760-5p   |
| LARP1 | hsa-miR-200ac-5p  |
| LARP1 | hsa-miR-532-5p    |
| LARP1 | hsa-miR-4283      |
| LARP1 | hsa-miR-3588      |

|       |                  |
|-------|------------------|
| LARP1 | hsa-miR-625-5p   |
| LARP1 | hsa-miR-224-5p   |
| LARP1 | hsa-miR-1811     |
| LARP1 | hsa-miR-30       |
| LARP1 | hsa-miR-6758-5p  |
| LARP1 | hsa-miR-2392     |
| LARP1 | hsa-miR-5107-5p  |
| LARP1 | hsa-miR-1913     |
| LARP1 | hsa-miR-2957     |
| LARP1 | hsa-miR-6643-5p  |
| LARP1 | hsa-miR-2343     |
| LARP1 | hsa-miR-4764-3p  |
| LARP1 | hsa-miR-6870-3p  |
| LARP1 | hsa-miR-1602     |
| LARP1 | hsa-miR-3549     |
| LARP1 | hsa-miR-593-5p   |
| LARP1 | hsa-miR-6913-5p  |
| LARP1 | hsa-miR-1574-3p  |
| LARP1 | hsa-miR-7296-5p  |
| LARP1 | hsa-miR-3113-3p  |
| LARP1 | hsa-miR-3106-3p  |
| LARP1 | hsa-miR-7326-3p  |
| LARP1 | hsa-miR-2470     |
| LARP1 | hsa-miR-483-3p.2 |
| LARP1 | hsa-miR-1544b-5p |
| LARP1 | hsa-miR-4524a-5p |
| LARP1 | hsa-miR-6761-5p  |
| LARP1 | hsa-miR-641      |
| LARP1 | hsa-miR-1744-3p  |
| LARP1 | hsa-miR-7162-3p  |
| LARP1 | hsa-miR-2897     |
| LARP1 | hsa-miR-410-3p   |
| LARP1 | hsa-miR-30c-1-3p |
| LARP1 | hsa-miR-1805-3p  |
| LARP1 | hsa-miR-6715b-3p |
| LARP1 | hsa-miR-7007-3p  |
| LARP1 | hsa-miR-1825     |
| LARP1 | hsa-miR-5627-3p  |
| LARP1 | hsa-miR-1968-5p  |
| LARP1 | hsa-miR-6529b    |
| LARP1 | hsa-miR-1207     |
| LARP1 | hsa-miR-3087-5p  |
| LARP1 | hsa-miR-5000-3p  |
| LARP1 | hsa-miR-4252     |
| LARP1 | hsa-miR-7262a-5p |
| LARP1 | hsa-miR-6945-5p  |

|       |                   |
|-------|-------------------|
| LARP1 | hsa-miR-2284z     |
| LARP1 | hsa-miR-23-5p     |
| LARP1 | hsa-miR-6323      |
| LARP1 | hsa-miR-2285j     |
| LARP1 | hsa-miR-412-5p    |
| LARP1 | hsa-miR-7398i-3p  |
| LARP1 | hsa-miR-7054-3p   |
| LARP1 | hsa-miR-7258-5p   |
| LARP1 | hsa-miR-520-5p    |
| LARP1 | hsa-miR-466ade-3p |
| LARP1 | hsa-miR-6085      |
| LARP1 | hsa-miR-6631-5p   |
| LARP1 | hsa-miR-6550-3p   |
| LARP1 | hsa-miR-5009-3p   |
| LARP1 | hsa-miR-7079-5p   |
| LARP1 | hsa-miR-6740-3p   |
| LARP1 | hsa-miR-5697-3p   |
| LARP1 | hsa-miR-765       |
| LARP1 | hsa-miR-7231-5p   |
| LARP1 | hsa-miR-642b-5p   |
| LARP1 | hsa-miR-4786-5p   |
| LARP1 | hsa-miR-4690-3p   |
| LARP1 | hsa-miR-384-5p    |
| LARP1 | hsa-miR-1249-5p   |
| LARP1 | hsa-miR-1540-3p   |
| LARP1 | hsa-miR-3145-3p   |
| LARP1 | hsa-miR-331-3p    |
| LARP1 | hsa-miR-5581-5p   |
| LARP1 | hsa-miR-6794-3p   |
| LARP1 | hsa-miR-6955-3p   |
| LARP1 | hsa-miR-7271-3p   |
| LARP1 | hsa-miR-3602      |
| LARP1 | hsa-miR-2326      |
| LARP1 | hsa-miR-383-5p    |
| LARP1 | hsa-miR-375-3p    |
| LARP1 | hsa-miR-3571      |
| LARP1 | hsa-miR-6973a-3p  |
| LARP1 | hsa-miR-7156-3p   |
| LARP1 | hsa-miR-3929      |
| LARP1 | hsa-miR-651-3p    |
| LARP1 | hsa-miR-8485      |
| LARP1 | hsa-miR-6926-3p   |
| LARP1 | hsa-miR-7163-5p   |
| LARP1 | hsa-miR-1452      |
| LARP1 | hsa-miR-512-5p    |
| LARP1 | hsa-miR-103-3p    |

|       |                  |
|-------|------------------|
| LARP1 | hsa-miR-8794     |
| LARP1 | hsa-miR-7298-5p  |
| LARP1 | hsa-miR-200a-3p  |
| LARP1 | hsa-miR-519e-3p  |
| LARP1 | hsa-miR-345-3p   |
| LARP1 | hsa-miR-5787     |
| LARP1 | hsa-miR-7678-3p  |
| LARP1 | hsa-miR-17-5p    |
| LARP1 | hsa-miR-150-3p   |
| LARP1 | hsa-miR-1291     |
| LARP1 | hsa-miR-8060     |
| LARP1 | hsa-miR-5684     |
| LARP1 | hsa-miR-7041-5p  |
| LARP1 | hsa-miR-466q     |
| LARP1 | hsa-miR-4300     |
| LARP1 | hsa-miR-4755-5p  |
| LARP1 | hsa-miR-412-3p   |
| LARP1 | hsa-miR-7364-3p  |
| LARP1 | hsa-miR-4739     |
| LARP1 | hsa-miR-5133     |
| LARP1 | hsa-miR-1892     |
| LARP1 | hsa-miR-7249-3p  |
| LARP1 | hsa-miR-7456-3p  |
| LARP1 | hsa-miR-1294     |
| LARP1 | hsa-miR-92a-2-5p |
| LARP1 | hsa-let-7-5p     |
| LARP1 | hsa-miR-655-5p   |
| LARP1 | hsa-miR-1185-5p  |
| LARP1 | hsa-miR-1239     |
| LARP1 | hsa-miR-922      |
| LARP1 | hsa-miR-6966-3p  |
| LARP1 | hsa-miR-3192     |
| LARP1 | hsa-miR-5195-5p  |
| LARP1 | hsa-miR-1706     |
| LARP1 | hsa-miR-7277-5p  |
| LARP1 | hsa-miR-6667-5p  |
| LARP1 | hsa-miR-1470     |
| LARP1 | hsa-miR-3916     |
| LARP1 | hsa-miR-7086-5p  |
| LARP1 | hsa-miR-6752-3p  |
| LARP1 | hsa-miR-4667     |
| LARP1 | hsa-miR-4728-5p  |
| LARP1 | hsa-miR-515      |
| LARP1 | hsa-miR-6979-5p  |
| LARP1 | hsa-miR-7073-5p  |
| LARP1 | hsa-miR-879-5p   |



|       |                  |
|-------|------------------|
| LARP1 | hsa-miR-2373-5p  |
| LARP1 | hsa-miR-449c-3p  |
| LARP1 | hsa-miR-6345     |
| LARP1 | hsa-miR-6803-5p  |
| LARP1 | hsa-miR-8854     |
| LARP1 | hsa-miR-6511-5p  |
| LARP1 | hsa-miR-1912-3p  |
| LARP1 | hsa-miR-6778-5p  |
| LARP1 | hsa-miR-7008-5p  |
| LARP1 | hsa-miR-885-3p   |
| LARP1 | hsa-miR-3199     |
| LARP1 | hsa-miR-7479-3p  |
| LARP1 | hsa-miR-340-5p   |
| LARP1 | hsa-miR-1632-5p  |
| LARP1 | hsa-miR-6562-5p  |
| LARP1 | hsa-miR-6865-3p  |
| LARP1 | hsa-miR-3093-3p  |
| LARP1 | hsa-miR-2334     |
| LARP1 | hsa-miR-514a-5p  |
| LARP1 | hsa-miR-7386m-3p |
| LARP1 | hsa-miR-188-5p   |
| LARP1 | hsa-miR-1669     |
| LARP1 | hsa-miR-606      |
| LARP1 | hsa-miR-6783-5p  |
| LARP1 | hsa-miR-1247-3p  |
| LARP1 | hsa-miR-8906     |
| LARP1 | hsa-miR-1599     |
| LARP1 | hsa-miR-4732-3p  |
| LARP1 | hsa-miR-7384-3p  |
| LARP1 | hsa-miR-6901-3p  |
| LARP1 | hsa-miR-516-3p   |
| LARP1 | hsa-miR-8908-5p  |
| LARP1 | hsa-miR-568      |
| LARP1 | hsa-miR-8898     |
| LARP1 | hsa-miR-4646-3p  |
| LARP1 | hsa-miR-6730-3p  |
| LARP1 | hsa-miR-30b-3p   |
| LARP1 | hsa-miR-7859     |
| LARP1 | hsa-miR-3200-5p  |
| LARP1 | hsa-miR-3064-5p  |
| LARP1 | hsa-miR-365a-5p  |
| LARP1 | hsa-miR-873-5p.2 |
| LARP1 | hsa-miR-4693-3p  |
| LARP1 | hsa-miR-7021-5p  |
| LARP1 | hsa-miR-135      |
| LARP1 | hsa-miR-6940-5p  |

|       |                  |
|-------|------------------|
| LARP1 | hsa-miR-6924-5p  |
| LARP1 | hsa-miR-3535     |
| LARP1 | hsa-miR-670-5p   |
| LARP1 | hsa-miR-7381-3p  |
| LARP1 | hsa-miR-3064     |
| LARP1 | hsa-miR-573      |
| LARP1 | hsa-miR-3158-3p  |
| LARP1 | hsa-miR-129-5p   |
| LARP1 | hsa-miR-7358-5p  |
| LARP1 | hsa-miR-4661-5p  |
| LARP1 | hsa-miR-6946-3p  |
| LARP1 | hsa-miR-6944-3p  |
| LARP1 | hsa-miR-1933-3p  |
| LARP1 | hsa-miR-1754-3p  |
| LARP1 | hsa-miR-4524a-3p |
| LARP1 | hsa-miR-7665-3p  |
| LARP1 | hsa-miR-3192-3p  |
| LARP1 | hsa-miR-6794-5p  |
| LARP1 | hsa-miR-6769b-3p |
| LARP1 | hsa-miR-3971     |
| LARP1 | hsa-miR-2188-5p  |
| LARP1 | hsa-miR-365-5p   |
| LARP1 | hsa-miR-1288-5p  |
| LARP1 | hsa-miR-7681-5p  |
| LARP1 | hsa-miR-1933-5p  |
| LARP1 | hsa-miR-7267-5p  |
| LARP1 | hsa-miR-3082-5p  |
| LARP1 | hsa-miR-6989-5p  |
| LARP1 | hsa-miR-7052-3p  |
| LARP1 | hsa-miR-6997-5p  |
| LARP1 | hsa-miR-7018-5p  |
| LARP1 | hsa-miR-4274     |
| LARP1 | hsa-miR-1910-5p  |
| LARP1 | hsa-miR-383-5p.2 |
| LARP1 | hsa-miR-221-3p   |
| LARP1 | hsa-miR-7152-5p  |
| LARP1 | hsa-miR-6549-3p  |
| LARP1 | hsa-miR-3691-5p  |
| LARP1 | hsa-miR-6870-5p  |
| LARP1 | hsa-miR-764-5p   |
| LARP1 | hsa-miR-4673     |
| LARP1 | hsa-miR-550-3p   |
| LARP1 | hsa-miR-717      |
| LARP1 | hsa-miR-6887-5p  |
| LARP1 | hsa-miR-373-3p   |
| LARP1 | hsa-miR-744-3p   |

|       |                   |
|-------|-------------------|
| LARP1 | hsa-miR-124-5p    |
| LARP1 | hsa-miR-7028-5p   |
| LARP1 | hsa-miR-6565-5p   |
| LARP1 | hsa-miR-31-5p     |
| LARP1 | hsa-miR-490-3p    |
| LARP1 | hsa-miR-377-3p    |
| LARP1 | hsa-miR-8897      |
| LARP1 | hsa-miR-195-5p    |
| LARP1 | hsa-miR-128-3p    |
| LARP1 | hsa-miR-544-5p    |
| LARP1 | hsa-miR-548c-3p   |
| LARP1 | hsa-miR-597       |
| LARP1 | hsa-miR-679       |
| LARP1 | hsa-miR-6608-3p   |
| LARP1 | hsa-miR-652-5p    |
| LARP1 | hsa-miR-1286      |
| LARP1 | hsa-miR-2900      |
| LARP1 | hsa-miR-4679      |
| LARP1 | hsa-miR-101b-3p.1 |
| LARP1 | hsa-miR-490-5p    |
| LARP1 | hsa-miR-6407      |
| LARP1 | hsa-miR-7976      |
| LARP1 | hsa-miR-125b-1-3p |
| LARP1 | hsa-miR-3173-3p   |
| LARP1 | hsa-miR-3109-3p   |
| LARP1 | hsa-miR-4639-3p   |
| LARP1 | hsa-miR-2320-5p   |
| LARP1 | hsa-miR-6715-5p   |
| LARP1 | hsa-miR-4733-3p   |
| LARP1 | hsa-miR-485-3p    |
| LARP1 | hsa-miR-8807      |
| LARP1 | hsa-miR-2188-3p   |
| LARP1 | hsa-miR-885-5p    |
| LARP1 | hsa-miR-4650-5p   |
| LARP1 | hsa-miR-612       |
| LARP1 | hsa-miR-30b-5p    |
| LARP1 | hsa-miR-548f-3p   |
| LARP1 | hsa-miR-455-5p    |
| LARP1 | hsa-miR-9500      |
| LARP1 | hsa-miR-7438-5p   |
| LARP1 | hsa-miR-1749-3p   |
| LARP1 | hsa-miR-4795-3p   |
| LARP1 | hsa-miR-6859-5p   |
| LARP1 | hsa-miR-4700-5p   |
| LARP1 | hsa-miR-3090-5p   |
| LARP1 | hsa-miR-5197-5p   |

|       |                  |
|-------|------------------|
| LARP1 | hsa-miR-7456-5p  |
| LARP1 | hsa-miR-516a-3p  |
| LARP1 | hsa-miR-9769-3p  |
| LARP1 | hsa-miR-551      |
| LARP1 | hsa-miR-3113-5p  |
| LARP1 | hsa-miR-2387     |
| LARP1 | hsa-miR-7275-5p  |
| LARP1 | hsa-miR-3621     |
| LARP1 | hsa-miR-7370i-3p |
| LARP1 | hsa-miR-6757-5p  |
| LARP1 | hsa-miR-7377-3p  |
| LARP1 | hsa-miR-8853     |
| LARP1 | hsa-miR-138-5p   |
| LARP1 | hsa-miR-1273f    |
| LARP1 | hsa-miR-7218-5p  |
| LARP1 | hsa-miR-6780b-3p |
| LARP1 | hsa-miR-7674-3p  |
| LARP1 | hsa-miR-496b     |
| LARP1 | hsa-miR-301-5p   |
| LARP1 | hsa-miR-6847-5p  |
| LARP1 | hsa-miR-335-5p   |
| LARP1 | hsa-miR-5132-3p  |
| LARP1 | hsa-miR-1606     |
| LARP1 | hsa-miR-6856-5p  |
| LARP1 | hsa-miR-212-3p   |
| LARP1 | hsa-miR-3472     |
| LARP1 | hsa-miR-7282-5p  |
| LARP1 | hsa-miR-134-3p   |
| LARP1 | hsa-miR-2861     |
| LARP1 | hsa-miR-7362-3p  |
| LARP1 | hsa-miR-331-3p   |
| LARP1 | hsa-miR-125      |
| LARP1 | hsa-miR-4478     |
| LARP1 | hsa-miR-6836-3p  |
| LARP1 | hsa-miR-7238-3p  |
| LARP1 | hsa-miR-30c-5p   |
| LARP1 | hsa-miR-4463     |
| LARP1 | hsa-miR-1941-5p  |
| LARP1 | hsa-miR-4776-5p  |
| LARP1 | hsa-miR-8846     |
| LARP1 | hsa-miR-433-5p   |
| LARP1 | hsa-miR-21-5p    |
| LARP1 | hsa-miR-6388     |
| LARP1 | hsa-miR-6960-5p  |
| LARP1 | hsa-miR-8842     |
| LARP1 | hsa-miR-7679-5p  |

|       |                  |
|-------|------------------|
| LARP1 | hsa-miR-1a-5p    |
| LARP1 | hsa-miR-4674     |
| LARP1 | hsa-miR-942-5p   |
| LARP1 | hsa-miR-6607-5p  |
| LARP1 | hsa-miR-192-3p   |
| LARP1 | hsa-miR-7364-5p  |
| LARP1 | hsa-miR-3561-5p  |
| LARP1 | hsa-miR-4708-5p  |
| LARP1 | hsa-miR-611      |
| LARP1 | hsa-miR-6982-5p  |
| LARP1 | hsa-miR-218-1-3p |
| LARP1 | hsa-miR-330-5p   |
| LARP1 | hsa-miR-697      |
| LARP1 | hsa-miR-2306     |
| LARP1 | hsa-miR-374-5p   |
| LARP1 | hsa-miR-665-5p   |
| LARP1 | hsa-miR-3069-5p  |
| LARP1 | hsa-miR-564      |
| LARP1 | hsa-miR-3473be   |
| LARP1 | hsa-miR-6994-5p  |
| LARP1 | hsa-miR-3924     |
| LARP1 | hsa-miR-2461-3p  |
| LARP1 | hsa-miR-7197-3p  |
| LARP1 | hsa-miR-7027-5p  |
| LARP1 | hsa-miR-522-3p   |
| LARP1 | hsa-miR-1682     |
| LARP1 | hsa-miR-1276     |
| LARP1 | hsa-miR-1648-5p  |
| LARP1 | hsa-miR-1226-3p  |
| LARP1 | hsa-miR-6090     |
| LARP1 | hsa-miR-4715-5p  |
| LARP1 | hsa-miR-7379-3p  |
| LARP1 | hsa-miR-6904-5p  |
| LARP1 | hsa-miR-6517     |
| LARP1 | hsa-miR-674-3p   |
| LARP1 | hsa-miR-4761-3p  |
| LARP1 | hsa-miR-7229-3p  |
| LARP1 | hsa-miR-7386k-3p |
| LARP1 | hsa-miR-7385e-3p |
| LARP1 | hsa-miR-7-5p     |
| LARP1 | hsa-miR-2485     |
| LARP1 | hsa-miR-9769-5p  |
| LARP1 | hsa-miR-3604     |
| LARP1 | hsa-miR-452-5p   |
| LARP1 | hsa-miR-4652-5p  |
| LARP1 | hsa-miR-6772-5p  |

|       |                   |
|-------|-------------------|
| LARP1 | hsa-miR-6943-5p   |
| LARP1 | hsa-miR-7037-5p   |
| LARP1 | hsa-miR-183-5p    |
| LARP1 | hsa-miR-7468-3p   |
| LSM1  | hsa-miR-1252-5p   |
| LSM1  | hsa-miR-607       |
| LSM1  | hsa-miR-3556a     |
| LSM1  | hsa-miR-7328-5p   |
| LSM1  | hsa-miR-139-5p    |
| LSM1  | hsa-miR-7204-3p   |
| LSM1  | hsa-miR-4684-3p   |
| LSM1  | hsa-miR-219-5p    |
| LSM1  | hsa-miR-2451      |
| LSM1  | hsa-miR-340-5p    |
| LSM1  | hsa-miR-4791      |
| LSM1  | hsa-miR-6818-5p   |
| LSM1  | hsa-miR-4735-5p   |
| LSM1  | hsa-miR-30a-3p    |
| LSM1  | hsa-miR-1902      |
| LSM1  | hsa-miR-6513-5p   |
| LSM1  | hsa-miR-489-3p    |
| LSM1  | hsa-miR-548ah-5p  |
| LSM1  | hsa-miR-133a-5p   |
| LSM1  | hsa-miR-3064-3p   |
| LSM1  | hsa-miR-4677-3p   |
| LSM1  | hsa-miR-27b-5p    |
| LSM1  | hsa-miR-622       |
| LSM1  | hsa-miR-7341-5p   |
| LSM1  | hsa-miR-8868      |
| LSM1  | hsa-miR-7319-5p   |
| LSM1  | hsa-miR-411-3p    |
| LSM1  | hsa-miR-6794-3p   |
| LSM1  | hsa-miR-2320-3p   |
| LSM1  | hsa-miR-5621-5p   |
| LSM1  | hsa-miR-892-3p    |
| LSM1  | hsa-miR-1-2-5p    |
| LSM1  | hsa-miR-2284-3p   |
| LSM1  | hsa-miR-3164      |
| LSM1  | hsa-miR-4477a     |
| LSM1  | hsa-miR-548z      |
| LSM1  | hsa-miR-183-5p    |
| LSM1  | hsa-miR-181b-2-3p |
| LSM1  | hsa-miR-669d-5p   |
| LSM1  | hsa-miR-548ac     |
| LSM1  | hsa-miR-5003-3p   |
| LSM1  | hsa-miR-4679      |

|      |                  |
|------|------------------|
| LSM1 | hsa-miR-8876     |
| LSM1 | hsa-miR-7678-5p  |
| LSM1 | hsa-miR-548az-5p |
| LSM1 | hsa-miR-743a-3p  |
| LSM1 | hsa-miR-570-3p   |
| LSM1 | hsa-miR-384-5p   |
| LSM1 | hsa-miR-141-3p   |
| LSM1 | hsa-miR-7039-5p  |
| LSM1 | hsa-miR-3913-5p  |
| LSM1 | hsa-miR-335-5p   |
| LSM1 | hsa-miR-2307     |
| LSM1 | hsa-miR-15c-3p   |
| LSM1 | hsa-miR-8870     |
| LSM1 | hsa-miR-452-5p   |
| LSM1 | hsa-miR-2467-5p  |
| LSM1 | hsa-miR-6999-3p  |
| LSM1 | hsa-miR-450b-3p  |
| LSM1 | hsa-let-7f-1-3p  |
| LSM1 | hsa-miR-1-1-5p   |
| LSM1 | hsa-miR-140-5p   |
| LSM1 | hsa-miR-2317     |
| LSM1 | hsa-miR-34bc-3p  |
| LSM1 | hsa-miR-1542-5p  |
| LSM1 | hsa-miR-4294     |
| LSM1 | hsa-miR-2294     |
| LSM1 | hsa-miR-3471     |
| LSM1 | hsa-miR-3470a    |
| LSM1 | hsa-miR-5706     |
| LSM1 | hsa-miR-548c-3p  |
| LSM1 | hsa-miR-6973b-3p |
| LSM1 | hsa-miR-7041-5p  |
| LSM1 | hsa-miR-6980-3p  |
| LSM1 | hsa-miR-7026-5p  |
| LSM1 | hsa-miR-3609     |
| LSM1 | hsa-miR-380-3p   |
| LSM1 | hsa-miR-219c-3p  |
| LSM1 | hsa-miR-3201     |
| LSM1 | hsa-miR-548c-3p  |
| LSM1 | hsa-miR-6815-5p  |
| LSM1 | hsa-miR-6856-3p  |
| LSM1 | hsa-miR-105-5p   |
| LSM1 | hsa-miR-200a-3p  |
| LSM1 | hsa-miR-2395     |
| LSM1 | hsa-miR-4703-3p  |
| LSM1 | hsa-miR-128      |
| LSM1 | hsa-miR-186-5p   |

|      |                   |
|------|-------------------|
| LSM1 | hsa-miR-450b      |
| LSM1 | hsa-miR-3059-3p   |
| LSM1 | hsa-miR-2367-5p   |
| LSM1 | hsa-miR-3573-5p   |
| LSM1 | hsa-miR-4444      |
| LSM1 | hsa-miR-542-3p    |
| LSM1 | hsa-miR-548d-3p   |
| LSM1 | hsa-miR-1265      |
| LSM1 | hsa-miR-5089-5p   |
| LSM1 | hsa-miR-4699-3p   |
| LSM1 | hsa-miR-618       |
| LSM1 | hsa-miR-7083-3p   |
| LSM1 | hsa-miR-3084bc-5p |
| LSM1 | hsa-miR-7685-3p   |
| LSM1 | hsa-miR-3577-3p   |
| LSM1 | hsa-miR-7671-5p   |
| LSM1 | hsa-miR-339-5p    |
| LSM1 | hsa-miR-1208      |
| LSM1 | hsa-miR-680       |
| LSM1 | hsa-miR-548as-3p  |
| LSM1 | hsa-miR-2388-5p   |
| LSM1 | hsa-miR-7031-5p   |
| LSM1 | hsa-miR-3185      |
| LSM1 | hsa-miR-5692a     |
| LSM1 | hsa-miR-125a-3p   |
| LSM1 | hsa-miR-7186-3p   |
| LSM1 | hsa-miR-340-5p    |
| LSM1 | hsa-miR-743b-3p   |
| LSM1 | hsa-miR-6970-3p   |
| LSM1 | hsa-miR-7319-3p   |
| LSM1 | hsa-miR-7854-3p   |
| LSM1 | hsa-miR-542       |
| LSM1 | hsa-miR-2383      |
| LSM1 | hsa-miR-30e       |
| LSM1 | hsa-miR-5186      |
| LSM1 | hsa-miR-1251-5p   |
| LSM1 | hsa-miR-7235-5p   |
| LSM1 | hsa-miR-153-3p    |
| LSM1 | hsa-miR-7371b-5p  |
| LSM1 | hsa-miR-1227-3p   |
| LSM1 | hsa-miR-338-5p    |
| LSM1 | hsa-miR-7389-3p   |
| LSM1 | hsa-miR-186-5p    |
| LSM1 | hsa-miR-3133      |
| LSM1 | hsa-miR-140-3p.1  |
| LSM1 | hsa-miR-105-5p    |



|      |                   |
|------|-------------------|
| LSM1 | hsa-miR-7360-3p   |
| LSM1 | hsa-miR-1323-5p   |
| LSM1 | hsa-miR-5108      |
| LSM1 | hsa-miR-362-5p    |
| LSM1 | hsa-miR-153       |
| LSM1 | hsa-miR-1243-5p   |
| LSM1 | hsa-miR-92a-1-5p  |
| LSM1 | hsa-miR-15b-3p    |
| LSM1 | hsa-miR-668-3p    |
| LSM1 | hsa-miR-676-5p    |
| LSM1 | hsa-miR-371       |
| LSM1 | hsa-miR-300-5p    |
| LSM1 | hsa-miR-302c-3p   |
| LSM1 | hsa-miR-1898      |
| LSM1 | hsa-miR-6875-3p   |
| LSM1 | hsa-miR-1294      |
| LSM1 | hsa-miR-1252      |
| LSM1 | hsa-miR-3138      |
| LSM1 | hsa-miR-8843      |
| LSM1 | hsa-miR-5616-3p   |
| LSM1 | hsa-miR-466aep-5p |
| LSM1 | hsa-miR-6516-3p   |
| LSM1 | hsa-miR-7668-5p   |
| LSM1 | hsa-miR-8831      |
| LSM1 | hsa-miR-3613b     |
| LSM1 | hsa-miR-7063-3p   |
| LSM1 | hsa-miR-133b-5p   |
| LSM1 | hsa-miR-138-5p    |
| LSM1 | hsa-miR-103-2-5p  |
| LSM1 | hsa-miR-302b-5p   |
| LSM1 | hsa-miR-4276      |
| LSM1 | hsa-miR-335-5p    |
| LSM1 | hsa-miR-30d-3p    |
| LSM1 | hsa-miR-29c-5p    |
| LSM1 | hsa-miR-4782-5p   |
| LSM1 | hsa-miR-30e-3p    |
| LSM1 | hsa-miR-7094-3p   |
| LSM1 | hsa-miR-367-3p    |
| LSM1 | hsa-miR-7325-3p   |
| LSM1 | hsa-miR-212-3p    |
| LSM1 | hsa-miR-132-3p    |
| LSM1 | hsa-miR-7324-3p   |
| LSM1 | hsa-miR-7387-5p   |
| LSM1 | hsa-miR-452-5p    |
| LSM1 | hsa-miR-425       |
| LSM1 | hsa-miR-548t-5p   |

|      |                   |
|------|-------------------|
| LSM1 | hsa-miR-511-3p    |
| LSM1 | hsa-miR-5697-5p   |
| LSM1 | hsa-miR-1934-5p   |
| LSM1 | hsa-miR-128-3p    |
| LSM1 | hsa-miR-19b-5p    |
| LSM1 | hsa-miR-540-3p    |
| LSM1 | hsa-miR-3607-3p   |
| LSM1 | hsa-miR-1193-3p   |
| LSM1 | hsa-miR-30-3p     |
| LSM1 | hsa-miR-5190      |
| LSM1 | hsa-miR-7344-5p   |
| LSM1 | hsa-miR-548q      |
| LSM1 | hsa-miR-3646      |
| LSM1 | hsa-miR-548n      |
| LSM1 | hsa-miR-29a-1-5p  |
| LSM1 | hsa-miR-1252-3p   |
| LSM1 | hsa-miR-331-3p    |
| LSM1 | hsa-miR-203-3p.2  |
| LSM1 | hsa-miR-3103-5p   |
| LSM1 | hsa-miR-1244      |
| LSM1 | hsa-miR-514-3p    |
| LSM1 | hsa-miR-3100-3p   |
| LSM1 | hsa-miR-1297      |
| LSM1 | hsa-miR-6946-3p   |
| LSM1 | hsa-miR-1291      |
| LSM1 | hsa-miR-668       |
| LSM1 | hsa-miR-3065-3p   |
| LSM1 | hsa-miR-2277-3p   |
| LSM1 | hsa-miR-3062-5p   |
| LSM1 | hsa-miR-450a-1-3p |
| LSM1 | hsa-miR-2486-5p   |
| LSM1 | hsa-miR-7292-5p   |
| LSM1 | hsa-miR-1305      |
| LSM1 | hsa-miR-383       |
| LSM1 | hsa-miR-4659a-3p  |
| LSM1 | hsa-miR-7271-3p   |
| LSM1 | hsa-miR-6515-3p   |
| LSM1 | hsa-miR-1943-5p   |
| LSM1 | hsa-miR-466l-5p   |
| LSM1 | hsa-miR-769-3p    |
| LSM1 | hsa-miR-6882-5p   |
| LSM1 | hsa-miR-5007-3p   |
| LSM1 | hsa-miR-7349-3p   |
| LSM1 | hsa-miR-8055      |
| LSM1 | hsa-miR-470-5p    |
| LSM1 | hsa-miR-8900      |

|      |                  |
|------|------------------|
| LSM1 | hsa-miR-5624-5p  |
| LSM1 | hsa-miR-210-5p   |
| LSM1 | hsa-miR-3117-5p  |
| LSM1 | hsa-miR-302d-5p  |
| LSM1 | hsa-miR-30-5p    |
| LSM1 | hsa-miR-7047-5p  |
| LSM1 | hsa-miR-7674-5p  |
| LSM1 | hsa-miR-7354-5p  |
| LSM1 | hsa-miR-4659b-3p |
| LSM1 | hsa-miR-7649-5p  |
| LSM1 | hsa-miR-7190-5p  |
| LSM1 | hsa-miR-548bb-3p |
| LSM1 | hsa-miR-466n-5p  |
| LSM1 | hsa-miR-425-5p   |
| LSM1 | hsa-miR-8062     |
| LSM1 | hsa-miR-1224-3p  |
| LSM1 | hsa-miR-7205-3p  |
| LSM1 | hsa-miR-2309     |
| LSM1 | hsa-miR-6728-5p  |
| LSM1 | hsa-miR-105b     |
| LSM1 | hsa-miR-2293     |
| LSM1 | hsa-miR-301-5p   |
| LSM1 | hsa-miR-2329-3p  |
| LSM1 | hsa-miR-206      |
| LSM1 | hsa-miR-7168-5p  |
| LSM1 | hsa-miR-887-5p   |
| LSM1 | hsa-miR-181-5p   |
| LSM1 | hsa-miR-1323     |
| LSM1 | hsa-miR-31-3p    |
| LSM1 | hsa-miR-4435     |
| LSM1 | hsa-miR-7374a-3p |
| LSM1 | hsa-miR-2458     |
| LSM1 | hsa-miR-138-5p   |
| LSM1 | hsa-miR-1-3p     |
| LSM1 | hsa-miR-4252     |
| LSM1 | hsa-miR-758-3p   |
| LSM1 | hsa-miR-6131     |
| LSM1 | hsa-miR-6865-5p  |
| LSM1 | hsa-miR-495-3p   |
| LSM1 | hsa-miR-2285x    |
| LSM1 | hsa-miR-448      |
| LSM1 | hsa-miR-153-5p   |
| LSM1 | hsa-miR-6965-5p  |
| LSM1 | hsa-miR-593-3p   |
| LSM1 | hsa-miR-6134     |
| LSM1 | hsa-miR-548h-3p  |

|         |                  |
|---------|------------------|
| LSM1    | hsa-miR-142-5p   |
| LSM1    | hsa-miR-2438     |
| LSM1    | hsa-miR-743ab-3p |
| LSM1    | hsa-miR-4495     |
| LSM1    | hsa-miR-7398q-3p |
| LSM1    | hsa-miR-6769a-3p |
| LSM1    | hsa-miR-423-5p   |
| LSM1    | hsa-miR-380      |
| LSM1    | hsa-miR-5093     |
| LSM1    | hsa-miR-3978     |
| LSM1    | hsa-miR-3611     |
| LSM1    | hsa-miR-8881     |
| LSM1    | hsa-miR-1279     |
| LSM1    | hsa-miR-3122     |
| LSM1    | hsa-miR-1227-3p  |
| METTTL1 | hsa-miR-7321-5p  |
| METTTL1 | hsa-miR-8866     |
| METTTL1 | hsa-miR-8100     |
| METTTL1 | hsa-miR-4768-5p  |
| METTTL1 | hsa-miR-302-3p   |
| METTTL1 | hsa-miR-193a     |
| METTTL1 | hsa-miR-92a-1-5p |
| METTTL1 | hsa-miR-712-5p   |
| METTTL1 | hsa-miR-4267     |
| METTTL1 | hsa-miR-4276     |
| METTTL1 | hsa-miR-4441     |
| METTTL1 | hsa-miR-216b-3p  |
| METTTL1 | hsa-miR-3589     |
| METTTL1 | hsa-miR-6902-5p  |
| METTTL1 | hsa-miR-6332     |
| METTTL1 | hsa-miR-6941-5p  |
| METTTL1 | hsa-miR-7059-5p  |
| METTTL1 | hsa-miR-7307-3p  |
| METTTL1 | hsa-miR-7250-3p  |
| METTTL1 | hsa-miR-2363     |
| METTTL1 | hsa-miR-30       |
| METTTL1 | hsa-miR-6920-5p  |
| METTTL1 | hsa-miR-6982-5p  |
| METTTL1 | hsa-miR-214-3p   |
| METTTL1 | hsa-miR-17-3p    |
| METTTL1 | hsa-miR-6907-5p  |
| METTTL1 | hsa-miR-499      |
| METTTL1 | hsa-miR-1225-3p  |
| METTTL1 | hsa-miR-3913-5p  |
| METTTL1 | hsa-miR-8880     |
| METTTL1 | hsa-miR-191-3p   |

|        |                  |
|--------|------------------|
| METTL1 | hsa-miR-302d-5p  |
| METTL1 | hsa-miR-7222-3p  |
| METTL1 | hsa-miR-8836     |
| METTL1 | hsa-miR-7213-5p  |
| METTL1 | hsa-miR-5710     |
| METTL1 | hsa-miR-1905     |
| METTL1 | hsa-miR-151-3p   |
| METTL1 | hsa-miR-193a-5p  |
| METTL1 | hsa-miR-5193     |
| METTL1 | hsa-miR-4760-5p  |
| METTL1 | hsa-miR-367-5p   |
| METTL1 | hsa-miR-3145-5p  |
| METTL1 | hsa-miR-3910     |
| METTL1 | hsa-miR-4254     |
| METTL1 | hsa-miR-8848     |
| METTL1 | hsa-miR-7247-5p  |
| METTL1 | hsa-miR-8876     |
| METTL1 | hsa-miR-5125     |
| METTL1 | hsa-miR-1254     |
| METTL1 | hsa-miR-1251-3p  |
| METTL1 | hsa-miR-6799-5p  |
| METTL1 | hsa-miR-7340-5p  |
| METTL1 | hsa-miR-486-5p   |
| METTL1 | hsa-miR-6808-5p  |
| METTL1 | hsa-miR-6384     |
| METTL1 | hsa-miR-6529-5p  |
| METTL1 | hsa-miR-432-5p   |
| METTL1 | hsa-miR-661      |
| METTL1 | hsa-miR-34-5p    |
| METTL1 | hsa-miR-7244-5p  |
| METTL1 | hsa-miR-140-3p.2 |
| METTL1 | hsa-miR-7069-5p  |
| METTL1 | hsa-miR-887-5p   |
| METTL1 | hsa-miR-412-3p   |
| METTL1 | hsa-miR-3150b-3p |
| METTL1 | hsa-miR-5087     |
| METTL1 | hsa-miR-612      |
| METTL1 | hsa-miR-1285-5p  |
| METTL1 | hsa-miR-6980-5p  |
| METTL1 | hsa-miR-1207-3p  |
| METTL1 | hsa-miR-466i-3p  |
| METTL1 | hsa-miR-7398s-3p |
| METTL1 | hsa-miR-133-5p   |
| METTL1 | hsa-miR-2451     |
| METTL1 | hsa-miR-8801     |
| METTL1 | hsa-miR-1224-3p  |

|        |                   |
|--------|-------------------|
| METTL1 | hsa-miR-3927-3p   |
| METTL1 | hsa-miR-7066-5p   |
| METTL1 | hsa-miR-7298-3p   |
| METTL1 | hsa-miR-4727-5p   |
| METTL1 | hsa-miR-6972-5p   |
| METTL1 | hsa-miR-4646-5p   |
| METTL1 | hsa-miR-7009-5p   |
| METTL1 | hsa-miR-2385-5p   |
| METTL1 | hsa-miR-4318      |
| METTL1 | hsa-miR-3689-3p   |
| METTL1 | hsa-miR-7056-5p   |
| METTL1 | hsa-miR-7-5p      |
| METTL1 | hsa-miR-6894-5p   |
| METTL1 | hsa-miR-149-5p    |
| METTL1 | hsa-miR-4451      |
| METTL1 | hsa-miR-320-5p    |
| METTL1 | hsa-miR-942-5p    |
| METTL1 | hsa-miR-642       |
| METTL1 | hsa-miR-6758-3p   |
| METTL1 | hsa-miR-449-5p    |
| METTL1 | hsa-miR-378-5p    |
| METTL1 | hsa-miR-510       |
| METTL1 | hsa-miR-2364      |
| METTL1 | hsa-miR-6503-3p   |
| METTL1 | hsa-miR-6731-5p   |
| METTL1 | hsa-miR-455-5p    |
| METTL1 | hsa-miR-4251      |
| METTL1 | hsa-miR-2114-3p   |
| METTL1 | hsa-miR-10b-5p    |
| METTL1 | hsa-miR-4697-3p   |
| METTL1 | hsa-miR-302b-5p   |
| METTL1 | hsa-miR-1264      |
| METTL1 | hsa-miR-4667-3p   |
| METTL1 | hsa-miR-1915-3p   |
| METTL1 | hsa-miR-7054-3p   |
| METTL1 | hsa-miR-3614-3p   |
| METTL1 | hsa-miR-4264      |
| METTL1 | hsa-miR-6979-5p   |
| METTL1 | hsa-miR-485-3p    |
| METTL1 | hsa-miR-452-3p    |
| METTL1 | hsa-miR-7356-5p   |
| METTL1 | hsa-miR-125b-2-3p |
| METTL1 | hsa-miR-3124-3p   |
| METTL1 | hsa-miR-504       |
| METTL1 | hsa-miR-8818      |
| METTL1 | hsa-miR-4689      |

|        |                  |
|--------|------------------|
| METTL1 | hsa-miR-6903-5p  |
| METTL1 | hsa-miR-4457     |
| METTL1 | hsa-miR-1251-5p  |
| METTL1 | hsa-miR-4286     |
| METTL1 | hsa-miR-136-5p   |
| METTL1 | hsa-miR-4728-5p  |
| METTL1 | hsa-miR-4711-3p  |
| METTL1 | hsa-miR-4761-5p  |
| METTL1 | hsa-miR-6754-5p  |
| METTL1 | hsa-miR-3569-3p  |
| METTL1 | hsa-miR-3162-5p  |
| METTL1 | hsa-miR-6792-5p  |
| METTL1 | hsa-miR-1b-5p    |
| METTL1 | hsa-miR-532-3p   |
| METTL1 | hsa-miR-6404     |
| METTL1 | hsa-miR-3192-5p  |
| METTL1 | hsa-miR-7074-5p  |
| METTL1 | hsa-miR-3138     |
| METTL1 | hsa-miR-18a-3p   |
| METTL1 | hsa-miR-3099-5p  |
| METTL1 | hsa-miR-6837-3p  |
| METTL1 | hsa-miR-717      |
| METTL1 | hsa-miR-329-3p   |
| METTL1 | hsa-miR-3591-3p  |
| METTL1 | hsa-miR-4433b-3p |
| METTL1 | hsa-miR-7318-5p  |
| METTL1 | hsa-miR-3652     |
| METTL1 | hsa-miR-764-3p   |
| METTL1 | hsa-miR-8061     |
| METTL1 | hsa-miR-6831-5p  |
| METTL1 | hsa-miR-2450a    |
| METTL1 | hsa-miR-6795-3p  |
| METTL1 | hsa-miR-193b-5p  |
| METTL1 | hsa-miR-7192-3p  |
| METTL1 | hsa-miR-1540-5p  |
| METTL1 | hsa-miR-548ba    |
| METTL1 | hsa-miR-4459     |
| METTL1 | hsa-miR-7350-5p  |
| METTL1 | hsa-miR-3122     |
| METTL1 | hsa-miR-412      |
| METTL1 | hsa-miR-466q     |
| METTL1 | hsa-miR-4743-3p  |
| METTL1 | hsa-miR-463-3p   |
| METTL1 | hsa-miR-3605-5p  |
| METTL1 | hsa-miR-2900     |
| METTL1 | hsa-miR-3177-5p  |

|        |                  |
|--------|------------------|
| METTL1 | hsa-miR-6878-5p  |
| METTL1 | hsa-miR-1840     |
| METTL1 | hsa-miR-186-5p   |
| METTL1 | hsa-miR-1285-3p  |
| METTL1 | hsa-miR-23-5p    |
| METTL1 | hsa-miR-1278     |
| METTL1 | hsa-miR-142      |
| METTL1 | hsa-miR-7051-3p  |
| METTL1 | hsa-miR-194-3p   |
| METTL1 | hsa-miR-511-3p   |
| METTL1 | hsa-miR-6901-3p  |
| METTL1 | hsa-miR-4639-5p  |
| METTL1 | hsa-miR-7845-5p  |
| METTL1 | hsa-miR-3187-5p  |
| METTL1 | hsa-miR-7081-5p  |
| METTL1 | hsa-miR-379-5p   |
| METTL1 | hsa-miR-7211-5p  |
| METTL1 | hsa-miR-6883-5p  |
| METTL1 | hsa-miR-466c-3p  |
| METTL1 | hsa-miR-624-3p   |
| METTL1 | hsa-miR-6780a-5p |
| METTL1 | hsa-miR-506-3p   |
| METTL1 | hsa-miR-6791-5p  |
| METTL1 | hsa-miR-643      |
| METTL1 | hsa-miR-8886     |
| METTL1 | hsa-miR-539-5p   |
| METTL1 | hsa-miR-450b-3p  |
| METTL1 | hsa-miR-3061-5p  |
| METTL1 | hsa-miR-6125     |
| METTL1 | hsa-miR-3551-3p  |
| METTL1 | hsa-miR-1285-3p  |
| METTL1 | hsa-miR-4693-5p  |
| METTL1 | hsa-miR-7068-3p  |
| METTL1 | hsa-miR-7398e-3p |
| METTL1 | hsa-miR-129b-5p  |
| METTL1 | hsa-miR-467f     |
| METTL1 | hsa-miR-4324     |
| METTL1 | hsa-miR-30c-3p   |
| METTL1 | hsa-miR-146b-3p  |
| METTL1 | hsa-miR-3126-5p  |
| METTL1 | hsa-miR-150-3p   |
| METTL1 | hsa-miR-200c-5p  |
| METTL1 | hsa-miR-508b     |
| METTL1 | hsa-miR-8789     |
| METTL1 | hsa-miR-6077     |
| METTL1 | hsa-miR-9500     |



|        |                   |
|--------|-------------------|
| METTL1 | hsa-miR-6926-5p   |
| METTL1 | hsa-miR-7854-3p   |
| METTL1 | hsa-miR-7152-5p   |
| METTL1 | hsa-miR-7362-3p   |
| METTL1 | hsa-miR-1200      |
| METTL1 | hsa-miR-8845      |
| METTL1 | hsa-miR-615-3p    |
| METTL1 | hsa-miR-7655-5p   |
| METTL1 | hsa-miR-8791      |
| METTL1 | hsa-miR-4270      |
| METTL1 | hsa-miR-3106-3p   |
| METTL1 | hsa-miR-3548      |
| METTL1 | hsa-miR-4521      |
| METTL1 | hsa-miR-7197-3p   |
| METTL1 | hsa-miR-6958-5p   |
| METTL1 | hsa-miR-5196-5p   |
| METTL1 | hsa-miR-7277-5p   |
| METTL1 | hsa-miR-194-1-3p  |
| METTL1 | hsa-miR-4733-5p   |
| METTL1 | hsa-miR-2392      |
| METTL1 | hsa-miR-517       |
| METTL1 | hsa-miR-7092-5p   |
| METTL1 | hsa-miR-30--3p    |
| METTL1 | hsa-miR-548ag     |
| METTL1 | hsa-miR-466b-4-3p |
| METTL1 | hsa-miR-3064-3p   |
| METTL1 | hsa-miR-361-3p    |
| METTL1 | hsa-miR-2459      |
| METTL1 | hsa-miR-554       |
| METTL1 | hsa-miR-936       |
| METTL1 | hsa-miR-3173-5p   |
| METTL1 | hsa-miR-4428      |
| METTL1 | hsa-miR-874-3p    |
| METTL1 | hsa-miR-192-5p    |
| METTL1 | hsa-miR-3100-5p   |
| METTL1 | hsa-miR-6738-3p   |
| METTL1 | hsa-miR-2339      |
| METTL1 | hsa-miR-2350      |
| METTL1 | hsa-miR-6720-5p   |
| METTL1 | hsa-miR-329       |
| METTL1 | hsa-miR-8823      |
| METTL1 | hsa-miR-6891-3p   |
| METTL1 | hsa-miR-6408      |
| METTL1 | hsa-miR-7170-3p   |
| METTL1 | hsa-miR-7864      |
| METTL1 | hsa-miR-7119-5p   |

|        |                   |
|--------|-------------------|
| METTL1 | hsa-miR-519-3p    |
| METTL1 | hsa-miR-6984-3p   |
| METTL1 | hsa-miR-449c-3p   |
| METTL1 | hsa-miR-1248      |
| METTL1 | hsa-miR-328       |
| METTL1 | hsa-miR-376a-1-5p |
| METTL1 | hsa-miR-2897      |
| METTL1 | hsa-miR-6917-3p   |
| METTL1 | hsa-miR-5046      |
| METTL1 | hsa-miR-8853      |
| METTL1 | hsa-miR-764-5p    |
| METTL1 | hsa-miR-520-3p    |
| METTL1 | hsa-miR-664-5p    |
| METTL1 | hsa-miR-1193-3p   |
| METTL1 | hsa-miR-221-5p    |
| METTL1 | hsa-miR-3116      |
| METTL1 | hsa-miR-6826-3p   |
| METTL1 | hsa-miR-7024-5p   |
| METTL1 | hsa-miR-3593-5p   |
| METTL1 | hsa-miR-6840-3p   |
| METTL1 | hsa-miR-4308      |
| METTL1 | hsa-miR-31-5p     |
| METTL1 | hsa-miR-1-3p      |
| METTL1 | hsa-miR-6893-5p   |
| METTL1 | hsa-miR-219b-5p   |
| METTL1 | hsa-miR-6515-5p   |
| METTL1 | hsa-miR-183-5p.2  |
| METTL1 | hsa-miR-423-3p    |
| METTL1 | hsa-miR-3551-5p   |
| METTL1 | hsa-miR-330-3p    |
| METTL1 | hsa-miR-679       |
| METTL1 | hsa-miR-1470      |
| METTL1 | hsa-miR-2387      |
| METTL1 | hsa-miR-3667-5p   |
| METTL1 | hsa-miR-188-3p    |
| METTL1 | hsa-miR-6131      |
| METTL1 | hsa-miR-4726-3p   |
| METTL1 | hsa-miR-4789-3p   |
| METTL1 | hsa-miR-6368      |
| METTL1 | hsa-miR-124-3p.1  |
| METTL1 | hsa-miR-6950-5p   |
| METTL1 | hsa-miR-29b-1-5p  |
| METTL1 | hsa-miR-3141      |
| METTL1 | hsa-miR-6779-5p   |
| METTL1 | hsa-miR-346-3p    |
| METTL1 | hsa-miR-6764-5p   |

|        |                   |
|--------|-------------------|
| METTL1 | hsa-miR-493       |
| METTL1 | hsa-miR-8831      |
| METTL1 | hsa-miR-2894      |
| METTL1 | hsa-miR-693-5p    |
| METTL1 | hsa-miR-139-5p    |
| METTL1 | hsa-miR-4643      |
| METTL1 | hsa-miR-204-3p    |
| METTL1 | hsa-miR-130a-5p   |
| METTL1 | hsa-miR-548ai     |
| METTL1 | hsa-miR-7338-3p   |
| METTL1 | hsa-miR-30c-2-3p  |
| METTL1 | hsa-miR-508-5p    |
| METTL1 | hsa-miR-373-3p    |
| METTL1 | hsa-miR-628-3p    |
| METTL1 | hsa-miR-2895      |
| METTL1 | hsa-miR-763       |
| METTL1 | hsa-miR-2411-3p   |
| METTL1 | hsa-miR-874       |
| METTL1 | hsa-miR-29-5p     |
| METTL1 | hsa-miR-3074-5p   |
| METTL1 | hsa-miR-466f-3p   |
| METTL1 | hsa-miR-7334-5p   |
| METTL1 | hsa-miR-1956-5p   |
| METTL1 | hsa-miR-4692      |
| METTL1 | hsa-miR-547-5p    |
| METTL1 | hsa-miR-449a      |
| METTL1 | hsa-miR-6875-3p   |
| METTL1 | hsa-miR-450a-1-3p |
| METTL1 | hsa-miR-145-5p    |
| METTL1 | hsa-miR-576-3p    |
| METTL1 | hsa-miR-188-5p    |
| METTL1 | hsa-miR-7386j-3p  |
| METTL1 | hsa-miR-6842-3p   |
| METTL1 | hsa-miR-3094-5p   |
| METTL1 | hsa-miR-29a-5p    |
| METTL1 | hsa-miR-7260-3p   |
| METTL1 | hsa-miR-4668-5p   |
| METTL1 | hsa-miR-6754-3p   |
| METTL1 | hsa-miR-1249-5p   |
| METTL1 | hsa-miR-483-3p    |
| METTL1 | hsa-miR-4298      |
| METTL1 | hsa-miR-217       |
| METTL1 | hsa-miR-6750-5p   |
| METTL1 | hsa-miR-7184-3p   |
| METTL1 | hsa-miR-21-3p     |
| METTL1 | hsa-miR-4659a-3p  |

|        |                   |
|--------|-------------------|
| METTL1 | hsa-miR-7976      |
| METTL1 | hsa-miR-1273h-5p  |
| METTL1 | hsa-miR-497-5p    |
| METTL1 | hsa-miR-338-3p    |
| METTL1 | hsa-miR-342-3p    |
| METTL1 | hsa-miR-7106-5p   |
| METTL1 | hsa-miR-7196-3p   |
| METTL1 | hsa-miR-6362      |
| METTL1 | hsa-miR-211-5p    |
| METTL1 | hsa-miR-5584-5p   |
| METTL1 | hsa-miR-591       |
| METTL1 | hsa-miR-7685-5p   |
| METTL1 | hsa-miR-370-3p    |
| METTL1 | hsa-miR-6909-5p   |
| METTL1 | hsa-miR-504-3p    |
| METTL1 | hsa-miR-4297      |
| METTL1 | hsa-miR-450a-2-3p |
| METTL1 | hsa-miR-362-3p    |
| METTL1 | hsa-miR-8808      |
| METTL1 | hsa-miR-7319-5p   |
| METTL1 | hsa-miR-4795-5p   |
| METTL1 | hsa-miR-181-5p    |
| METTL1 | hsa-miR-1207      |
| METTL1 | hsa-miR-3192      |
| METTL1 | hsa-miR-548au-3p  |
| METTL1 | hsa-miR-205-3p    |
| METTL1 | hsa-miR-874-5p    |
| METTL1 | hsa-miR-149-3p    |
| METTL1 | hsa-miR-4514      |
| METTL1 | hsa-miR-6929-5p   |
| METTL1 | hsa-miR-3064-5p   |
| METTL1 | hsa-miR-3475-3p   |
| METTL1 | hsa-miR-669c-3p   |
| METTL1 | hsa-miR-624-3p    |
| METTL1 | hsa-miR-6318      |
| METTL1 | hsa-miR-3121-5p   |
| METTL1 | hsa-miR-3092-3p   |
| METTL1 | hsa-miR-765       |
| METTL1 | hsa-miR-4666a-5p  |
| METTL1 | hsa-miR-6785-5p   |
| METTL1 | hsa-miR-150-5p    |
| METTL1 | hsa-miR-6739-5p   |
| METTL1 | hsa-miR-152-5p    |
| METTL1 | hsa-miR-8060      |
| METTL1 | hsa-miR-4650-3p   |
| METTL1 | hsa-miR-4645-5p   |

|        |                  |
|--------|------------------|
| METTL1 | hsa-miR-3613b    |
| METTL1 | hsa-miR-5197-5p  |
| METTL1 | hsa-miR-6398     |
| METTL1 | hsa-miR-1976     |
| METTL1 | hsa-miR-145-3p   |
| METTL1 | hsa-miR-92a-2-5p |
| METTL1 | hsa-miR-7252-3p  |
| METTL1 | hsa-miR-215-5p   |
| METTL1 | hsa-miR-544a     |
| METTL1 | hsa-miR-139-3p   |
| METTL1 | hsa-miR-1545a-3p |
| METTL1 | hsa-miR-769      |
| METTL1 | hsa-miR-3564     |
| METTL1 | hsa-miR-7035-3p  |
| METTL1 | hsa-miR-4684-5p  |
| METTL1 | hsa-miR-7386e-3p |
| METTL1 | hsa-miR-3135a    |
| METTL1 | hsa-miR-4747-5p  |
| METTL1 | hsa-miR-513b-5p  |
| METTL1 | hsa-miR-2449     |
| METTL1 | hsa-miR-2881     |
| METTL1 | hsa-miR-7216-5p  |
| METTL1 | hsa-miR-1953     |
| METTL1 | hsa-miR-6366     |
| METTL1 | hsa-miR-5108     |
| METTL1 | hsa-miR-200b-3p  |
| METTL1 | hsa-miR-939-3p   |
| METTL1 | hsa-miR-1239     |
| METTL1 | hsa-miR-6809-3p  |
| METTL1 | hsa-miR-4704-3p  |
| METTL1 | hsa-miR-6936-5p  |
| METTL1 | hsa-miR-338-3p   |
| METTL1 | hsa-miR-4797-3p  |
| METTL1 | hsa-miR-4433a-5p |
| METTL1 | hsa-miR-7678-3p  |
| METTL1 | hsa-miR-4660     |
| METTL1 | hsa-miR-3432a    |
| METTL1 | hsa-miR-6890-3p  |
| METTL1 | hsa-miR-570-5p   |
| METTL1 | hsa-miR-3057-3p  |
| METTL1 | hsa-miR-2411-5p  |
| METTL1 | hsa-miR-6797-5p  |
| METTL1 | hsa-miR-16-5p    |
| METTL1 | hsa-miR-3927-3p  |
| METTL1 | hsa-miR-7116-3p  |
| METTL1 | hsa-miR-367-3p   |

|        |                  |
|--------|------------------|
| METTL1 | hsa-miR-1251     |
| METTL1 | hsa-miR-467g     |
| METTL1 | hsa-miR-342-5p   |
| METTL1 | hsa-miR-1193     |
| METTL1 | hsa-miR-5190     |
| METTL1 | hsa-miR-124      |
| METTL1 | hsa-miR-8904b    |
| METTL1 | hsa-miR-2330-3p  |
| METTL1 | hsa-miR-5001-3p  |
| METTL1 | hsa-miR-6523a    |
| METTL1 | hsa-miR-1277-3p  |
| METTL1 | hsa-miR-6736-3p  |
| METTL1 | hsa-miR-6356     |
| METTL1 | hsa-miR-7688-3p  |
| METTL1 | hsa-miR-379-5p   |
| METTL1 | hsa-miR-615-5p   |
| METTL1 | hsa-miR-7011-5p  |
| METTL1 | hsa-miR-4659b-3p |
| METTL1 | hsa-miR-8841     |
| METTL1 | hsa-miR-630      |
| METTL1 | hsa-miR-7847-3p  |
| METTL1 | hsa-miR-7023-5p  |
| METTL1 | hsa-miR-7372-3p  |
| METTL1 | hsa-miR-193-5p   |
| METTL1 | hsa-miR-101-1-5p |
| METTL1 | hsa-miR-892a     |
| METTL1 | hsa-miR-670-3p   |
| METTL1 | hsa-miR-1226-3p  |
| METTL1 | hsa-miR-6822-5p  |
| METTL1 | hsa-miR-6760-5p  |
| METTL1 | hsa-miR-7218-5p  |
| METTL1 | hsa-miR-466b-5p  |
| METTL1 | hsa-miR-6733-5p  |
| METTL1 | hsa-miR-1267     |
| METTL1 | hsa-miR-6517     |
| METTL1 | hsa-miR-5581-5p  |
| METTL1 | hsa-miR-145-5p   |
| METTL1 | hsa-miR-3619-5p  |
| METTL1 | hsa-miR-6991-3p  |
| METTL1 | hsa-miR-2902     |
| METTL1 | hsa-miR-4662b    |
| METTL1 | hsa-miR-6807-5p  |
| METTL1 | hsa-miR-924      |
| METTL1 | hsa-miR-4426     |
| METTL1 | hsa-miR-3085-3p  |
| METTL1 | hsa-miR-7055-5p  |

|        |                   |
|--------|-------------------|
| METTL1 | hsa-miR-760-5p    |
| METTL1 | hsa-miR-7035-5p   |
| METTL1 | hsa-miR-7386b-3p  |
| METTL1 | hsa-miR-204-5p    |
| METTL1 | hsa-miR-8837      |
| METTL1 | hsa-miR-6072      |
| METTL1 | hsa-miR-3658      |
| METTL1 | hsa-miR-5189-5p   |
| METTL1 | hsa-miR-7261-5p   |
| METTL1 | hsa-miR-186-3p    |
| METTL1 | hsa-miR-470-5p    |
| METTL1 | hsa-miR-4323      |
| METTL1 | hsa-miR-7237-3p   |
| METTL1 | hsa-miR-7385a-3p  |
| METTL1 | hsa-miR-7377-3p   |
| METTL1 | hsa-miR-3154      |
| METTL1 | hsa-miR-940       |
| METTL1 | hsa-miR-544b      |
| METTL1 | hsa-miR-7652-3p   |
| METTL1 | hsa-miR-15        |
| METTL1 | hsa-miR-2114-5p   |
| METTL1 | hsa-miR-342-3p    |
| METTL1 | hsa-miR-3058-5p   |
| METTL1 | hsa-miR-372-3p    |
| METTL1 | hsa-miR-146-5p    |
| METTL1 | hsa-miR-8832      |
| METTL1 | hsa-miR-8847      |
| METTL1 | hsa-miR-4433b-5p  |
| METTL1 | hsa-miR-8085      |
| METTL1 | hsa-miR-196-3p    |
| METTL1 | hsa-miR-5787      |
| METTL1 | hsa-miR-7150      |
| METTL1 | hsa-miR-4661-3p   |
| METTL1 | hsa-miR-6959-5p   |
| METTL1 | hsa-miR-34        |
| METTL1 | hsa-miR-9769-5p   |
| METTL1 | hsa-miR-6995-5p   |
| METTL1 | hsa-miR-181a-2-3p |
| METTL1 | hsa-miR-4696      |
| METTL1 | hsa-miR-486-5p    |
| METTL1 | hsa-miR-202-3p    |
| METTL1 | hsa-miR-7684-5p   |
| METTL1 | hsa-miR-3583-3p   |
| METTL1 | hsa-miR-6914-5p   |
| METTL1 | hsa-miR-605-3p    |
| METTL1 | hsa-miR-140-3p.1  |

|        |                  |
|--------|------------------|
| METTL1 | hsa-miR-3153     |
| METTL1 | hsa-miR-207      |
| METTL1 | hsa-miR-540-3p   |
| METTL1 | hsa-miR-7230-5p  |
| METTL1 | hsa-miR-3083-5p  |
| METTL1 | hsa-miR-673-3p   |
| METTL1 | hsa-miR-324-3p   |
| METTL1 | hsa-miR-6788-5p  |
| METTL1 | hsa-miR-7217-3p  |
| METTL1 | hsa-miR-6910-5p  |
| METTL1 | hsa-miR-6507-3p  |
| METTL1 | hsa-miR-8796     |
| METTL1 | hsa-miR-216a-3p  |
| METTL1 | hsa-miR-5004-5p  |
| METTL1 | hsa-miR-378d     |
| METTL1 | hsa-miR-6793-5p  |
| METTL1 | hsa-miR-7277-3p  |
| METTL1 | hsa-miR-513      |
| METTL1 | hsa-miR-6372     |
| METTL1 | hsa-miR-7354-3p  |
| METTL1 | hsa-miR-18-3p    |
| METTL1 | hsa-miR-6930-5p  |
| METTL1 | hsa-miR-1956-3p  |
| METTL1 | hsa-miR-7386l-3p |
| METTL1 | hsa-miR-6794-3p  |
| METTL1 | hsa-miR-206-5p   |
| METTL1 | hsa-miR-297bc-3p |
| METTL1 | hsa-miR-7006-5p  |
| METTL1 | hsa-miR-7356-3p  |
| METTL1 | hsa-miR-370      |
| METTL1 | hsa-miR-7373b-3p |
| METTL1 | hsa-miR-124-3p.2 |
| METTL1 | hsa-miR-8908-5p  |
| METTL1 | hsa-miR-6834-3p  |
| METTL1 | hsa-miR-2428     |
| METTL1 | hsa-miR-759      |
| METTL1 | hsa-miR-7018-3p  |
| METTL1 | hsa-miR-3938-3p  |
| METTL1 | hsa-miR-4446-5p  |
| METTL1 | hsa-miR-885-5p   |
| METTL1 | hsa-miR-6951-3p  |
| METTL1 | hsa-miR-6858-5p  |
| METTL1 | hsa-miR-2355-5p  |
| METTL1 | hsa-miR-30b-3p   |
| METTL1 | hsa-miR-7192-5p  |
| METTL1 | hsa-miR-6860     |



|        |                   |
|--------|-------------------|
| METTL1 | hsa-miR-223-3p    |
| METTL1 | hsa-miR-3547-5p   |
| METTL1 | hsa-miR-8857      |
| METTL1 | hsa-miR-7240-5p   |
| METTL1 | hsa-miR-299-3p    |
| METTL1 | hsa-miR-148-5p    |
| METTL1 | hsa-miR-7091-5p   |
| METTL1 | hsa-miR-7304-3p   |
| METTL1 | hsa-miR-4292      |
| METTL1 | hsa-miR-30-5p     |
| METTL1 | hsa-miR-6904-5p   |
| METTL1 | hsa-miR-889-5p    |
| METTL1 | hsa-miR-429       |
| METTL1 | hsa-miR-7293-5p   |
| METTL1 | hsa-miR-520f-5p   |
| METTL1 | hsa-miR-7023-3p   |
| METTL1 | hsa-miR-378a-5p   |
| METTL1 | hsa-miR-7279-5p   |
| METTL1 | hsa-miR-1843      |
| METTL1 | hsa-miR-133       |
| METTL1 | hsa-miR-550a-3p   |
| METTL1 | hsa-miR-4652-3p   |
| METTL1 | hsa-miR-627-3p    |
| METTL1 | hsa-miR-6938-3p   |
| METTL1 | hsa-miR-4430      |
| METTL1 | hsa-miR-2324      |
| METTL1 | hsa-miR-510-5p    |
| METTL1 | hsa-miR-2447      |
| METTL1 | hsa-miR-6787-3p   |
| METTL1 | hsa-miR-672-3p    |
| METTL1 | hsa-miR-4680      |
| METTL1 | hsa-miR-1277-3p   |
| METTL1 | hsa-miR-7309-5p   |
| METTL1 | hsa-miR-6405      |
| METTL1 | hsa-miR-6833-3p   |
| METTL1 | hsa-miR-873-3p    |
| METTL1 | hsa-miR-384-5p    |
| METTL1 | hsa-miR-539-5p    |
| METTL1 | hsa-miR-7-5p      |
| METTL1 | hsa-miR-6134      |
| METTL1 | hsa-miR-505-5p    |
| METTL1 | hsa-miR-466b-2-3p |
| METTL1 | hsa-miR-4505      |
| METTL1 | hsa-miR-518-5p    |
| METTL1 | hsa-miR-519-5p    |
| METTL1 | hsa-miR-466ade-3p |

|        |                   |
|--------|-------------------|
| METTL1 | hsa-miR-576-5p    |
| METTL1 | hsa-miR-455-3p    |
| METTL1 | hsa-miR-1957a     |
| METTL1 | hsa-miR-7160-5p   |
| METTL1 | hsa-miR-194-2-3p  |
| METTL1 | hsa-miR-2360      |
| METTL1 | hsa-miR-518-3p    |
| METTL1 | hsa-miR-2486-5p   |
| METTL1 | hsa-miR-766-5p    |
| METTL1 | hsa-miR-1982-5p   |
| METTL1 | hsa-miR-27-3p     |
| METTL1 | hsa-miR-651-3p    |
| METTL1 | hsa-miR-136-5p    |
| METTL1 | hsa-miR-7154-5p   |
| METTL1 | hsa-miR-96-5p     |
| METTL1 | hsa-miR-1899      |
| METTL1 | hsa-miR-6721-5p   |
| METTL1 | hsa-miR-642a-5p   |
| METTL1 | hsa-miR-6887-3p   |
| METTL1 | hsa-miR-7286-3p   |
| METTL1 | hsa-miR-324       |
| METTL1 | hsa-miR-8812      |
| METTL1 | hsa-miR-5680      |
| METTL1 | hsa-miR-3097-3p   |
| METTL1 | hsa-miR-7383-3p   |
| METTL1 | hsa-miR-7289-5p   |
| METTL1 | hsa-miR-7050-3p   |
| METTL1 | hsa-miR-466bcp-3p |
| METTL1 | hsa-miR-4647      |
| METTL1 | hsa-miR-8905      |
| METTL1 | hsa-miR-6974-3p   |
| METTL1 | hsa-miR-6740-5p   |
| METTL1 | hsa-miR-6969-5p   |
| METTL1 | hsa-miR-766-3p    |
| METTL1 | hsa-miR-451b      |
| METTL1 | hsa-miR-6513-5p   |
| METTL1 | hsa-miR-4530      |
| METTL1 | hsa-miR-1911-3p   |
| METTL1 | hsa-miR-4695-3p   |
| METTL1 | hsa-miR-3104-5p   |
| METTL1 | hsa-miR-185-5p    |
| METTL1 | hsa-miR-1-5p      |
| METTL1 | hsa-miR-466       |
| METTL1 | hsa-miR-192-5p    |
| METTL1 | hsa-miR-7019-5p   |
| METTL1 | hsa-miR-7154-3p   |

|        |                  |
|--------|------------------|
| METTL1 | hsa-miR-215      |
| METTL1 | hsa-miR-766-3p   |
| METTL1 | hsa-miR-2442     |
| METTL1 | hsa-miR-195-5p   |
| METTL1 | hsa-miR-1545c-3p |
| METTL1 | hsa-miR-3075-5p  |
| METTL1 | hsa-miR-345-3p   |
| METTL1 | hsa-miR-7185-5p  |
| METTL1 | hsa-miR-6946-3p  |
| METTL1 | hsa-miR-7088-3p  |
| METTL1 | hsa-miR-185-5p   |
| METTL1 | hsa-miR-10b-5p   |
| METTL1 | hsa-miR-466mo-3p |
| METTL1 | hsa-miR-3584-5p  |
| METTL1 | hsa-miR-30-3p    |
| METTL1 | hsa-miR-128-3p   |
| METTL1 | hsa-miR-4673     |
| METTL1 | hsa-miR-1952     |
| METTL1 | hsa-miR-1302     |
| METTL1 | hsa-miR-7038-3p  |
| METTL1 | hsa-miR-10b-3p   |
| METTL1 | hsa-miR-5110     |
| METTL1 | hsa-miR-129-2-3p |
| METTL1 | hsa-miR-1913     |
| METTL1 | hsa-miR-769-3p   |
| METTL1 | hsa-miR-146      |
| METTL1 | hsa-miR-4274     |
| METTL1 | hsa-miR-7270-3p  |
| METTL1 | hsa-miR-7382-5p  |
| NCBP1  | hsa-miR-215-5p   |
| NCBP1  | hsa-miR-1250-3p  |
| NCBP1  | hsa-miR-6506-5p  |
| NCBP1  | hsa-miR-871-5p   |
| NCBP1  | hsa-miR-188-5p   |
| NCBP1  | hsa-miR-7352-3p  |
| NCBP1  | hsa-miR-4709-3p  |
| NCBP1  | hsa-miR-743ab-3p |
| NCBP1  | hsa-miR-2468     |
| NCBP1  | hsa-miR-3475-5p  |
| NCBP1  | hsa-miR-942-5p   |
| NCBP1  | hsa-miR-4282     |
| NCBP1  | hsa-miR-7280-5p  |
| NCBP1  | hsa-miR-5698     |
| NCBP1  | hsa-miR-543      |
| NCBP1  | hsa-miR-19b-5p   |
| NCBP1  | hsa-miR-3159     |

|       |                  |
|-------|------------------|
| NCBP1 | hsa-miR-8792     |
| NCBP1 | hsa-miR-125-5p   |
| NCBP1 | hsa-miR-2461-3p  |
| NCBP1 | hsa-miR-8843     |
| NCBP1 | hsa-miR-7389-3p  |
| NCBP1 | hsa-miR-4490     |
| NCBP1 | hsa-miR-3170     |
| NCBP1 | hsa-miR-6122-3p  |
| NCBP1 | hsa-miR-6085     |
| NCBP1 | hsa-miR-664a-5p  |
| NCBP1 | hsa-miR-2284d    |
| NCBP1 | hsa-miR-5699-3p  |
| NCBP1 | hsa-miR-488-3p   |
| NCBP1 | hsa-miR-544-3p   |
| NCBP1 | hsa-miR-2355-5p  |
| NCBP1 | hsa-miR-7257-3p  |
| NCBP1 | hsa-miR-3653-5p  |
| NCBP1 | hsa-miR-7043-5p  |
| NCBP1 | hsa-miR-883-3p   |
| NCBP1 | hsa-miR-575      |
| NCBP1 | hsa-miR-6715a-3p |
| NCBP1 | hsa-miR-330-3p   |
| NCBP1 | hsa-miR-3103-3p  |
| NCBP1 | hsa-miR-6742-3p  |
| NCBP1 | hsa-miR-4666b    |
| NCBP1 | hsa-miR-551b-5p  |
| NCBP1 | hsa-miR-1258     |
| NCBP1 | hsa-miR-2113     |
| NCBP1 | hsa-miR-6810-5p  |
| NCBP1 | hsa-miR-6723-5p  |
| NCBP1 | hsa-miR-3152-3p  |
| NCBP1 | hsa-miR-6128     |
| NCBP1 | hsa-miR-5702     |
| NCBP1 | hsa-miR-301-5p   |
| NCBP1 | hsa-miR-603      |
| NCBP1 | hsa-miR-691      |
| NCBP1 | hsa-miR-4796-3p  |
| NCBP1 | hsa-miR-5589-5p  |
| NCBP1 | hsa-miR-3605-5p  |
| NCBP1 | hsa-let-7c-1-3p  |
| NCBP1 | hsa-miR-411-5p   |
| NCBP1 | hsa-miR-483-3p   |
| NCBP1 | hsa-miR-6534     |
| NCBP1 | hsa-miR-5697-5p  |
| NCBP1 | hsa-miR-3622a-3p |
| NCBP1 | hsa-miR-4676-5p  |

|       |                 |
|-------|-----------------|
| NCBP1 | hsa-miR-30e-3p  |
| NCBP1 | hsa-miR-548a-5p |
| NCBP1 | hsa-miR-5579-5p |
| NCBP1 | hsa-miR-659-3p  |
| NCBP1 | hsa-miR-3928-5p |
| NCBP1 | hsa-miR-212-3p  |
| NCBP1 | hsa-miR-4518    |
| NCBP1 | hsa-miR-3167-5p |
| NCBP1 | hsa-miR-892a    |
| NCBP1 | hsa-miR-5706    |
| NCBP1 | hsa-miR-5196-3p |
| NCBP1 | hsa-miR-142-3p  |
| NCBP1 | hsa-miR-6379    |
| NCBP1 | hsa-miR-7074-5p |
| NCBP1 | hsa-miR-582-5p  |
| NCBP1 | hsa-miR-7207-3p |
| NCBP1 | hsa-miR-4711-5p |
| NCBP1 | hsa-miR-338-3p  |
| NCBP1 | hsa-miR-1283    |
| NCBP1 | hsa-miR-3095-5p |
| NCBP1 | hsa-miR-33-5p   |
| NCBP1 | hsa-miR-8119    |
| NCBP1 | hsa-miR-7334-5p |
| NCBP1 | hsa-miR-3125    |
| NCBP1 | hsa-miR-519-3p  |
| NCBP1 | hsa-let-7b-3p   |
| NCBP1 | hsa-miR-1912-5p |
| NCBP1 | hsa-miR-7032-3p |
| NCBP1 | hsa-miR-764-5p  |
| NCBP1 | hsa-miR-1236-3p |
| NCBP1 | hsa-miR-1271-3p |
| NCBP1 | hsa-miR-153-5p  |
| NCBP1 | hsa-miR-7226-3p |
| NCBP1 | hsa-miR-7269-3p |
| NCBP1 | hsa-miR-3681-5p |
| NCBP1 | hsa-miR-9-3p    |
| NCBP1 | hsa-miR-3191-3p |
| NCBP1 | hsa-miR-150-5p  |
| NCBP1 | hsa-miR-3157-5p |
| NCBP1 | hsa-miR-2337    |
| NCBP1 | hsa-miR-211-3p  |
| NCBP1 | hsa-miR-8108    |
| NCBP1 | hsa-miR-129-5p  |
| NCBP1 | hsa-miR-6411    |
| NCBP1 | hsa-miR-8056    |
| NCBP1 | hsa-miR-1244    |

|       |                   |
|-------|-------------------|
| NCBP1 | hsa-miR-450a-1-3p |
| NCBP1 | hsa-miR-548aq-5p  |
| NCBP1 | hsa-miR-4723-5p   |
| NCBP1 | hsa-miR-669ao-3p  |
| NCBP1 | hsa-miR-1273f     |
| NCBP1 | hsa-miR-628-3p    |
| NCBP1 | hsa-miR-378j      |
| NCBP1 | hsa-miR-200a-3p   |
| NCBP1 | hsa-miR-203-3p.1  |
| NCBP1 | hsa-miR-5571-3p   |
| NCBP1 | hsa-miR-4298      |
| NCBP1 | hsa-miR-2482      |
| NCBP1 | hsa-miR-4771      |
| NCBP1 | hsa-miR-6943-3p   |
| NCBP1 | hsa-miR-548ah-3p  |
| NCBP1 | hsa-miR-4252      |
| NCBP1 | hsa-miR-26        |
| NCBP1 | hsa-miR-8120      |
| NCBP1 | hsa-miR-4454      |
| NCBP1 | hsa-miR-598-3p    |
| NCBP1 | hsa-miR-23a-3p    |
| NCBP1 | hsa-miR-672-5p    |
| NCBP1 | hsa-miR-101a-5p   |
| NCBP1 | hsa-miR-3570      |
| NCBP1 | hsa-miR-3473f     |
| NCBP1 | hsa-miR-569       |
| NCBP1 | hsa-miR-7267-5p   |
| NCBP1 | hsa-miR-6517      |
| NCBP1 | hsa-miR-3173-3p   |
| NCBP1 | hsa-miR-196b-3p   |
| NCBP1 | hsa-miR-654-5p    |
| NCBP1 | hsa-miR-540-5p    |
| NCBP1 | hsa-miR-203       |
| NCBP1 | hsa-miR-6715b-3p  |
| NCBP1 | hsa-miR-6077      |
| NCBP1 | hsa-miR-693-5p    |
| NCBP1 | hsa-let-7ag-3p    |
| NCBP1 | hsa-miR-548g-5p   |
| NCBP1 | hsa-miR-6780b-5p  |
| NCBP1 | hsa-miR-199-3p    |
| NCBP1 | hsa-miR-7398b-3p  |
| NCBP1 | hsa-miR-3662      |
| NCBP1 | hsa-miR-7160-5p   |
| NCBP1 | hsa-miR-514a-3p   |
| NCBP1 | hsa-miR-4524a-5p  |
| NCBP1 | hsa-miR-4498      |

|       |                  |
|-------|------------------|
| NCBP1 | hsa-miR-633      |
| NCBP1 | hsa-miR-548av-3p |
| NCBP1 | hsa-miR-877-5p   |
| NCBP1 | hsa-miR-2053     |
| NCBP1 | hsa-miR-548ab    |
| NCBP1 | hsa-miR-944      |
| NCBP1 | hsa-miR-431-5p   |
| NCBP1 | hsa-miR-1958     |
| NCBP1 | hsa-miR-3121-5p  |
| NCBP1 | hsa-miR-4777-3p  |
| NCBP1 | hsa-miR-296-3p   |
| NCBP1 | hsa-miR-7284-3p  |
| NCBP1 | hsa-miR-1279     |
| NCBP1 | hsa-miR-548b-3p  |
| NCBP1 | hsa-miR-205-3p   |
| NCBP1 | hsa-miR-590-5p   |
| NCBP1 | hsa-miR-218-1-3p |
| NCBP1 | hsa-miR-1284     |
| NCBP1 | hsa-miR-619-3p   |
| NCBP1 | hsa-miR-1952     |
| NCBP1 | hsa-miR-7246-5p  |
| NCBP1 | hsa-miR-4657     |
| NCBP1 | hsa-miR-185-3p   |
| NCBP1 | hsa-miR-5582-3p  |
| NCBP1 | hsa-miR-8834b    |
| NCBP1 | hsa-miR-3168     |
| NCBP1 | hsa-miR-193b-5p  |
| NCBP1 | hsa-miR-105-5p   |
| NCBP1 | hsa-miR-1231-3p  |
| NCBP1 | hsa-miR-141-3p   |
| NCBP1 | hsa-miR-6385     |
| NCBP1 | hsa-miR-548f-3p  |
| NCBP1 | hsa-miR-204-3p   |
| NCBP1 | hsa-miR-3094-3p  |
| NCBP1 | hsa-miR-4690-3p  |
| NCBP1 | hsa-miR-345-5p   |
| NCBP1 | hsa-miR-412-3p   |
| NCBP1 | hsa-miR-138-1-3p |
| NCBP1 | hsa-miR-582-5p   |
| NCBP1 | hsa-miR-5104     |
| NCBP1 | hsa-miR-3923     |
| NCBP1 | hsa-miR-32-5p    |
| NCBP1 | hsa-miR-5089-3p  |
| NCBP1 | hsa-miR-501-5p   |
| NCBP1 | hsa-miR-425-5p   |
| NCBP1 | hsa-miR-153-3p   |

|       |                   |
|-------|-------------------|
| NCBP1 | hsa-miR-3190-3p   |
| NCBP1 | hsa-miR-8055      |
| NCBP1 | hsa-miR-290       |
| NCBP1 | hsa-miR-8864      |
| NCBP1 | hsa-miR-875-5p    |
| NCBP1 | hsa-miR-24-3p     |
| NCBP1 | hsa-miR-499a-3p   |
| NCBP1 | hsa-miR-6756-3p   |
| NCBP1 | hsa-miR-3557-3p   |
| NCBP1 | hsa-miR-194-5p    |
| NCBP1 | hsa-miR-626       |
| NCBP1 | hsa-miR-376b-5p   |
| NCBP1 | hsa-miR-1951      |
| NCBP1 | hsa-miR-548ay-5p  |
| NCBP1 | hsa-miR-3174      |
| NCBP1 | hsa-miR-3680-3p   |
| NCBP1 | hsa-miR-6729-3p   |
| NCBP1 | hsa-miR-556-5p    |
| NCBP1 | hsa-miR-6733-5p   |
| NCBP1 | hsa-miR-6947-3p   |
| NCBP1 | hsa-miR-137       |
| NCBP1 | hsa-miR-2313-3p   |
| NCBP1 | hsa-miR-548       |
| NCBP1 | hsa-miR-7371a-5p  |
| NCBP1 | hsa-miR-6730-5p   |
| NCBP1 | hsa-miR-92        |
| NCBP1 | hsa-miR-216b      |
| NCBP1 | hsa-miR-203a-3p.1 |
| NCBP1 | hsa-miR-5008-3p   |
| NCBP1 | hsa-miR-937-5p    |
| NCBP1 | hsa-miR-7213-5p   |
| NCBP1 | hsa-miR-548e-5p   |
| NCBP1 | hsa-miR-497-3p    |
| NCBP1 | hsa-miR-877-3p    |
| NCBP1 | hsa-miR-6728-5p   |
| NCBP1 | hsa-miR-7019-5p   |
| NCBP1 | hsa-miR-505-5p    |
| NCBP1 | hsa-miR-2477      |
| NCBP1 | hsa-miR-7370i-3p  |
| NCBP1 | hsa-miR-551-5p    |
| NCBP1 | hsa-miR-6773-3p   |
| NCBP1 | hsa-miR-653-3p    |
| NCBP1 | hsa-miR-489       |
| NCBP1 | hsa-miR-1234-3p   |
| NCBP1 | hsa-miR-292-5p    |
| NCBP1 | hsa-miR-561-5p    |



|       |                  |
|-------|------------------|
| NCBP1 | hsa-miR-548d-3p  |
| NCBP1 | hsa-miR-301-3p   |
| NCBP1 | hsa-miR-7173-5p  |
| NCBP1 | hsa-miR-145-5p   |
| NCBP1 | hsa-miR-6838-3p  |
| NCBP1 | hsa-miR-489-3p   |
| NCBP1 | hsa-miR-124-5p   |
| NCBP1 | hsa-miR-3471     |
| NCBP1 | hsa-miR-876      |
| NCBP1 | hsa-miR-93-5p    |
| NCBP1 | hsa-miR-380-5p   |
| NCBP1 | hsa-miR-7660-3p  |
| NCBP1 | hsa-miR-2329-5p  |
| NCBP1 | hsa-miR-517      |
| NCBP1 | hsa-miR-520c-3p  |
| NCBP1 | hsa-miR-581      |
| NCBP1 | hsa-miR-2332     |
| NCBP1 | hsa-miR-548am-5p |
| NCBP1 | hsa-miR-6837-3p  |
| NCBP1 | hsa-miR-4725-5p  |
| NCBP1 | hsa-miR-2437     |
| NCBP1 | hsa-miR-4503     |
| NCBP1 | hsa-miR-329-5p   |
| NCBP1 | hsa-miR-224-5p   |
| NCBP1 | hsa-miR-520g-3p  |
| NCBP1 | hsa-miR-4288     |
| NCBP1 | hsa-miR-3590-3p  |
| NCBP1 | hsa-miR-6754-3p  |
| NCBP1 | hsa-miR-548f-5p  |
| NCBP1 | hsa-miR-421-3p   |
| NCBP1 | hsa-miR-7207-5p  |
| NCBP1 | hsa-miR-411-3p   |
| NCBP1 | hsa-miR-654-3p   |
| NCBP1 | hsa-miR-7388a-3p |
| NCBP1 | hsa-miR-1835     |
| NCBP1 | hsa-miR-4524b-3p |
| NCBP1 | hsa-miR-1950     |
| NCBP1 | hsa-miR-8874     |
| NCBP1 | hsa-miR-365a-5p  |
| NCBP1 | hsa-miR-411-5p.2 |
| NCBP1 | hsa-miR-577      |
| NCBP1 | hsa-miR-4803     |
| NCBP1 | hsa-miR-6839-5p  |
| NCBP1 | hsa-miR-548ae-5p |
| NCBP1 | hsa-miR-2386     |
| NCBP1 | hsa-miR-6891-5p  |

|       |                  |
|-------|------------------|
| NCBP1 | hsa-miR-556-3p   |
| NCBP1 | hsa-miR-7194-5p  |
| NCBP1 | hsa-miR-374b-3p  |
| NCBP1 | hsa-miR-6348     |
| NCBP1 | hsa-miR-1226-3p  |
| NCBP1 | hsa-miR-3590-5p  |
| NCBP1 | hsa-miR-122      |
| NCBP1 | hsa-miR-5190     |
| NCBP1 | hsa-miR-6823-5p  |
| NCBP1 | hsa-miR-5685     |
| NCBP1 | hsa-miR-2351     |
| NCBP1 | hsa-miR-4703-3p  |
| NCBP1 | hsa-miR-374-5p   |
| NCBP1 | hsa-miR-411-5p   |
| NCBP1 | hsa-miR-7218-5p  |
| NCBP1 | hsa-miR-4659a-5p |
| NCBP1 | hsa-miR-502-5p   |
| NCBP1 | hsa-miR-4742-3p  |
| NCBP1 | hsa-miR-1291     |
| NCBP1 | hsa-miR-6404     |
| NCBP1 | hsa-miR-6938-3p  |
| NCBP1 | hsa-miR-3544-5p  |
| NCBP1 | hsa-miR-6927-3p  |
| NCBP1 | hsa-miR-3144-5p  |
| NCBP1 | hsa-miR-7275-3p  |
| NCBP1 | hsa-miR-548as-3p |
| NCBP1 | hsa-miR-1915-3p  |
| NCBP1 | hsa-miR-513c-3p  |
| NCBP1 | hsa-miR-504-3p   |
| NCBP1 | hsa-miR-4310     |
| NCBP1 | hsa-miR-4699-5p  |
| NCBP1 | hsa-miR-155-5p   |
| NCBP1 | hsa-miR-4289     |
| NCBP1 | hsa-miR-7208-5p  |
| NCBP1 | hsa-miR-559      |
| NCBP1 | hsa-miR-767      |
| NCBP1 | hsa-miR-154-5p   |
| NCBP1 | hsa-miR-127-5p   |
| NCBP1 | hsa-miR-3916     |
| NCBP1 | hsa-miR-506-5p   |
| NCBP1 | hsa-miR-874-3p   |
| NCBP1 | hsa-miR-6508-5p  |
| NCBP1 | hsa-miR-2479     |
| NCBP1 | hsa-miR-3123     |
| NCBP1 | hsa-miR-1323     |
| NCBP1 | hsa-miR-513b-3p  |

|       |                   |
|-------|-------------------|
| NCBP1 | hsa-miR-17-5p     |
| NCBP1 | hsa-miR-223-3p    |
| NCBP1 | hsa-miR-873a-5p.1 |
| NCBP1 | hsa-miR-7394b-5p  |
| NCBP1 | hsa-miR-7007-3p   |
| NCBP1 | hsa-miR-6737-3p   |
| NCBP1 | hsa-miR-4795-5p   |
| NCBP1 | hsa-miR-876-3p    |
| NCBP1 | hsa-miR-4760-3p   |
| NCBP1 | hsa-miR-2284m     |
| NCBP1 | hsa-miR-548as-5p  |
| NCBP1 | hsa-miR-4728-3p   |
| NCBP1 | hsa-miR-98-3p     |
| NCBP1 | hsa-miR-7241-5p   |
| NCBP1 | hsa-miR-215-3p    |
| NCBP1 | hsa-miR-562       |
| NCBP1 | hsa-miR-3129-5p   |
| NCBP1 | hsa-miR-3099-5p   |
| NCBP1 | hsa-miR-7001-3p   |
| NCBP1 | hsa-miR-7191-5p   |
| NCBP1 | hsa-miR-6840-3p   |
| NCBP1 | hsa-miR-450a      |
| NCBP1 | hsa-miR-6999-3p   |
| NCBP1 | hsa-let-7a-3p     |
| NCBP1 | hsa-miR-891a-3p   |
| NCBP1 | hsa-miR-600       |
| NCBP1 | hsa-miR-293-5p    |
| NCBP1 | hsa-miR-2322-3p   |
| NCBP1 | hsa-miR-376c      |
| NCBP1 | hsa-miR-883ab-3p  |
| NCBP1 | hsa-miR-548bb-5p  |
| NCBP1 | hsa-miR-7650-5p   |
| NCBP1 | hsa-miR-9-5p      |
| NCBP1 | hsa-miR-299       |
| NCBP1 | hsa-miR-2454-3p   |
| NCBP1 | hsa-miR-550a-3-5p |
| NCBP1 | hsa-miR-802       |
| NCBP1 | hsa-miR-1933-3p   |
| NCBP1 | hsa-miR-7b-3p     |
| NCBP1 | hsa-miR-361-5p    |
| NCBP1 | hsa-miR-758-5p    |
| NCBP1 | hsa-miR-4729      |
| NCBP1 | hsa-miR-126-3p    |
| NCBP1 | hsa-miR-4700-5p   |
| NCBP1 | hsa-miR-6321      |
| NCBP1 | hsa-miR-7220-3p   |

|       |                  |
|-------|------------------|
| NCBP1 | hsa-miR-1286     |
| NCBP1 | hsa-miR-548b-5p  |
| NCBP1 | hsa-miR-449a     |
| NCBP1 | hsa-miR-452-5p   |
| NCBP1 | hsa-miR-4782-5p  |
| NCBP1 | hsa-miR-669b-5p  |
| NCBP1 | hsa-miR-4520-5p  |
| NCBP1 | hsa-miR-548at-3p |
| NCBP1 | hsa-miR-17       |
| NCBP1 | hsa-miR-548n     |
| NCBP1 | hsa-miR-7660-5p  |
| NCBP1 | hsa-miR-2424     |
| NCBP1 | hsa-miR-203-3p   |
| NCBP1 | hsa-miR-377-3p   |
| NCBP1 | hsa-miR-6958-3p  |
| NCBP1 | hsa-miR-881-3p   |
| NCBP1 | hsa-let-7abf-3p  |
| NCBP1 | hsa-miR-7349-3p  |
| NCBP1 | hsa-miR-7277-3p  |
| NCBP1 | hsa-miR-320-5p   |
| NCBP1 | hsa-miR-1902     |
| NCBP1 | hsa-miR-4468     |
| NCBP1 | hsa-miR-550a-5p  |
| NCBP1 | hsa-miR-8854     |
| NCBP1 | hsa-miR-2356     |
| NCBP1 | hsa-miR-132-3p   |
| NCBP1 | hsa-miR-6765-3p  |
| NCBP1 | hsa-miR-545-3p   |
| NCBP1 | hsa-miR-6771-3p  |
| NCBP1 | hsa-miR-3966     |
| NCBP1 | hsa-miR-6909-3p  |
| NCBP1 | hsa-miR-463-5p   |
| NCBP1 | hsa-miR-7262b-5p |
| NCBP1 | hsa-miR-7386g-3p |
| NCBP1 | hsa-miR-674-5p   |
| NCBP1 | hsa-miR-4271     |
| NCBP1 | hsa-miR-636      |
| NCBP1 | hsa-miR-6813-3p  |
| NCBP1 | hsa-miR-541-5p   |
| NCBP1 | hsa-miR-376b-3p  |
| NCBP1 | hsa-miR-372-3p   |
| NCBP1 | hsa-miR-548i-3p  |
| NCBP1 | hsa-miR-4438     |
| NCBP1 | hsa-miR-7388a-5p |
| NCBP1 | hsa-miR-7013-3p  |
| NCBP1 | hsa-miR-130-3p   |

|       |                  |
|-------|------------------|
| NCBP1 | hsa-miR-6759-3p  |
| NCBP1 | hsa-miR-7188-3p  |
| NCBP1 | hsa-miR-4263     |
| NCBP1 | hsa-miR-107-5p   |
| NCBP1 | hsa-miR-4778-5p  |
| NCBP1 | hsa-miR-1267     |
| NCBP1 | hsa-miR-619      |
| NCBP1 | hsa-miR-669p-3p  |
| NCBP1 | hsa-miR-567      |
| NCBP1 | hsa-miR-548t-3p  |
| NCBP1 | hsa-miR-6782-5p  |
| NCBP1 | hsa-miR-627-3p   |
| NCBP1 | hsa-miR-548aw    |
| NCBP1 | hsa-miR-373-3p   |
| NCBP1 | hsa-miR-3595     |
| NCBP1 | hsa-miR-1194     |
| NCBP1 | hsa-miR-4780     |
| NCBP1 | hsa-miR-6848-3p  |
| NCBP1 | hsa-miR-190a-5p  |
| NCBP1 | hsa-miR-6937-3p  |
| NCBP1 | hsa-miR-197-5p   |
| NCBP1 | hsa-miR-7647-5p  |
| NCBP1 | hsa-miR-1298-5p  |
| NCBP1 | hsa-miR-33a-3p   |
| NCBP1 | hsa-miR-326      |
| NCBP1 | hsa-miR-548bd-3p |
| NCBP1 | hsa-miR-3146     |
| NCBP1 | hsa-miR-8052     |
| NCBP1 | hsa-miR-367-5p   |
| NCBP1 | hsa-miR-1266-5p  |
| NCBP1 | hsa-miR-7359-5p  |
| NCBP1 | hsa-miR-23b-3p   |
| NCBP1 | hsa-miR-455-5p   |
| NCBP1 | hsa-miR-224-5p   |
| NCBP1 | hsa-miR-361-3p   |
| NCBP1 | hsa-miR-125a-3p  |
| NCBP1 | hsa-miR-4516     |
| NCBP1 | hsa-miR-365b-5p  |
| NCBP1 | hsa-miR-7379-5p  |
| NCBP1 | hsa-miR-487-5p   |
| NCBP1 | hsa-miR-7370-5p  |
| NCBP1 | hsa-miR-3120-3p  |
| NCBP1 | hsa-miR-297      |
| NCBP1 | hsa-miR-18       |
| NCBP1 | hsa-miR-2472     |
| NCBP1 | hsa-miR-6919-3p  |

|       |                  |
|-------|------------------|
| NCBP1 | hsa-miR-875      |
| NCBP1 | hsa-miR-4463     |
| NCBP1 | hsa-miR-708-5p   |
| NCBP1 | hsa-miR-7151-3p  |
| NCBP1 | hsa-miR-6914-5p  |
| NCBP1 | hsa-miR-3090-5p  |
| NCBP1 | hsa-miR-4708-5p  |
| NCBP1 | hsa-miR-676-3p   |
| NCBP1 | hsa-miR-130c-5p  |
| NCBP1 | hsa-miR-6807-5p  |
| NCBP1 | hsa-miR-302-3p   |
| NCBP1 | hsa-miR-6975-3p  |
| NCBP1 | hsa-miR-7398q-3p |
| NCBP1 | hsa-miR-372      |
| NCBP1 | hsa-miR-6758-5p  |
| NCBP1 | hsa-miR-186-5p   |
| NCBP1 | hsa-miR-7174-5p  |
| NCBP1 | hsa-miR-545-5p   |
| NCBP1 | hsa-miR-8846     |
| NCBP1 | hsa-miR-6931-3p  |
| NCBP1 | hsa-miR-3691-5p  |
| NCBP1 | hsa-miR-6928-5p  |
| NCBP1 | hsa-miR-192-5p   |
| NCBP1 | hsa-miR-6513-5p  |
| NCBP1 | hsa-miR-6969-5p  |
| NCBP1 | hsa-miR-6739-5p  |
| NCBP1 | hsa-miR-221-3p   |
| NCBP1 | hsa-miR-412      |
| NCBP1 | hsa-miR-624-3p   |
| NCBP1 | hsa-miR-2285z    |
| NCBP1 | hsa-miR-3077-3p  |
| NCBP1 | hsa-miR-544a     |
| NCBP1 | hsa-miR-2054     |
| NCBP1 | hsa-miR-351-5p   |
| NCBP1 | hsa-miR-7219-3p  |
| NCBP1 | hsa-miR-211-5p   |
| NCBP1 | hsa-miR-509-5p   |
| NCBP1 | hsa-miR-6907-5p  |
| NCBP1 | hsa-miR-598-5p   |
| NCBP1 | hsa-miR-4720-3p  |
| NCBP1 | hsa-miR-7195-5p  |
| NCBP1 | hsa-miR-548az-3p |
| NCBP1 | hsa-miR-548ad-5p |
| NCBP1 | hsa-miR-483-3p.1 |
| NCBP1 | hsa-miR-550      |
| NCBP1 | hsa-miR-548am-3p |

|       |                 |
|-------|-----------------|
| NCBP1 | hsa-miR-4256    |
| NCBP1 | hsa-miR-2369    |
| NCBP1 | hsa-miR-190-3p  |
| NCBP1 | hsa-miR-7033-5p |
| NCBP1 | hsa-miR-2284x   |
| NCBP1 | hsa-miR-6913-3p |
| NCBP1 | hsa-miR-500-3p  |
| NCBP1 | hsa-miR-6504-3p |
| NCBP1 | hsa-miR-7268-5p |
| NCBP1 | hsa-miR-2301    |
| NCBP1 | hsa-miR-182-3p  |
| NCBP1 | hsa-miR-3560    |
| NCBP1 | hsa-miR-337-5p  |
| NCBP1 | hsa-miR-1343-5p |
| NCBP1 | hsa-miR-2284k   |
| NCBP1 | hsa-miR-3154    |
| NCBP1 | hsa-miR-362-5p  |
| NCBP1 | hsa-miR-410     |
| NCBP1 | hsa-miR-548c-3p |
| NCBP1 | hsa-miR-323     |
| NCBP1 | hsa-miR-550a-3p |
| NCBP1 | hsa-miR-555     |
| NCBP1 | hsa-miR-8093    |
| NCBP1 | hsa-miR-2402    |
| NCBP1 | hsa-miR-6814-5p |
| NCBP1 | hsa-miR-8871    |
| NCBP1 | hsa-miR-3613-3p |
| NCBP1 | hsa-miR-24-5p   |
| NCBP1 | hsa-miR-6920-5p |
| NCBP1 | hsa-miR-495-3p  |
| NCBP1 | hsa-miR-628-5p  |
| NCBP1 | hsa-miR-23      |
| NCBP1 | hsa-miR-155-5p  |
| NCBP1 | hsa-miR-7851-3p |
| NCBP1 | hsa-miR-7279-5p |
| NCBP1 | hsa-miR-9-5p    |
| NCBP1 | hsa-miR-570-3p  |
| NCBP1 | hsa-miR-206     |
| NCBP1 | hsa-miR-3611    |
| NCBP1 | hsa-miR-25-3p   |
| NCBP1 | hsa-miR-8067    |
| NCBP1 | hsa-miR-496     |
| NCBP1 | hsa-miR-6859-5p |
| NCBP1 | hsa-miR-2397-3p |
| NCBP1 | hsa-miR-4434    |
| NCBP1 | hsa-miR-1299    |

|       |                  |
|-------|------------------|
| NCBP1 | hsa-miR-144-3p   |
| NCBP1 | hsa-miR-6122-5p  |
| NCBP1 | hsa-miR-7387-5p  |
| NCBP1 | hsa-miR-6792-5p  |
| NCBP1 | hsa-miR-7005-5p  |
| NCBP1 | hsa-miR-500b-5p  |
| NCBP1 | hsa-miR-7166-5p  |
| NCBP1 | hsa-miR-3127-3p  |
| NCBP1 | hsa-miR-361-5p   |
| NCBP1 | hsa-miR-26-5p    |
| NCBP1 | hsa-miR-6971-3p  |
| NCBP1 | hsa-miR-465-5p   |
| NCBP1 | hsa-miR-4446-5p  |
| NCBP1 | hsa-miR-629-5p   |
| NCBP1 | hsa-miR-21-5p    |
| NCBP1 | hsa-miR-499-5p   |
| NCBP1 | hsa-miR-6764-3p  |
| NCBP1 | hsa-miR-548ae-3p |
| NCBP1 | hsa-miR-2364     |
| NCBP1 | hsa-miR-145-5p   |
| NCBP1 | hsa-miR-6502-5p  |
| NCBP1 | hsa-miR-632      |
| NCBP1 | hsa-miR-105-5p   |
| NCBP1 | hsa-miR-362-3p   |
| NCBP1 | hsa-miR-3135b    |
| NCBP1 | hsa-miR-669hk-3p |
| NCBP1 | hsa-miR-423-3p   |
| NCBP1 | hsa-miR-4793-5p  |
| NCBP1 | hsa-miR-92-3p    |
| NCBP1 | hsa-miR-7040-3p  |
| NCBP1 | hsa-miR-878      |
| NCBP1 | hsa-miR-465a-5p  |
| NCBP1 | hsa-miR-578      |
| NCBP1 | hsa-miR-34a-3p   |
| NCBP1 | hsa-miR-374a-5p  |
| NCBP1 | hsa-miR-7026-3p  |
| NCBP1 | hsa-miR-7067-5p  |
| NCBP1 | hsa-miR-201-3p   |
| NCBP1 | hsa-miR-7169-5p  |
| NCBP1 | hsa-miR-613      |
| NCBP1 | hsa-miR-504      |
| NCBP1 | hsa-miR-520-3p   |
| NCBP1 | hsa-miR-693-3p   |
| NCBP1 | hsa-miR-6867-5p  |
| NCBP1 | hsa-miR-4540     |
| NCBP1 | hsa-miR-6778-3p  |



|       |                  |
|-------|------------------|
| NCBP1 | hsa-miR-6368     |
| NCBP1 | hsa-miR-4691-3p  |
| NCBP1 | hsa-miR-3664-5p  |
| NCBP1 | hsa-miR-1273g-3p |
| NCBP1 | hsa-miR-6855-5p  |
| NCBP1 | hsa-miR-4751     |
| NCBP1 | hsa-miR-548b-3p  |
| NCBP1 | hsa-miR-630      |
| NCBP1 | hsa-miR-577-3p   |
| NCBP1 | hsa-miR-7360-3p  |
| NCBP1 | hsa-miR-7112-3p  |
| NCBP1 | hsa-miR-2399-3p  |
| NCBP1 | hsa-miR-1302     |
| NCBP1 | hsa-miR-8065     |
| NCBP1 | hsa-miR-378      |
| NCBP1 | hsa-miR-152-5p   |
| NCBP1 | hsa-miR-4496     |
| NCBP1 | hsa-miR-141-5p   |
| NCBP1 | hsa-miR-93-5p    |
| NCBP1 | hsa-miR-452-3p   |
| NCBP1 | hsa-miR-6354     |
| NCBP1 | hsa-miR-106b-5p  |
| NCBP1 | hsa-miR-7856-5p  |
| NCBP1 | hsa-miR-431-5p   |
| NCBP1 | hsa-miR-3201     |
| NCBP1 | hsa-miR-6764-5p  |
| NCBP1 | hsa-miR-375      |
| NCBP1 | hsa-miR-7a-2-3p  |
| NCBP1 | hsa-miR-216c-5p  |
| NCBP1 | hsa-miR-548c-3p  |
| NCBP1 | hsa-miR-7193-5p  |
| NCBP1 | hsa-miR-4731-5p  |
| NCBP1 | hsa-miR-7185-5p  |
| NCBP1 | hsa-miR-7373d-3p |
| NCBP1 | hsa-miR-556-5p   |
| NCBP1 | hsa-miR-548ay-3p |
| NCBP1 | hsa-miR-6876-5p  |
| NCBP1 | hsa-miR-589-5p   |
| NCBP1 | hsa-miR-3572     |
| NCBP1 | hsa-miR-4420     |
| NCBP1 | hsa-miR-382-3p   |
| NCBP1 | hsa-miR-4491     |
| NCBP1 | hsa-miR-4428     |
| NCBP1 | hsa-miR-584-5p   |
| NCBP1 | hsa-miR-520g-5p  |
| NCBP1 | hsa-miR-7034-5p  |

|       |                  |
|-------|------------------|
| NCBP1 | hsa-miR-7273-3p  |
| NCBP1 | hsa-let-7f-1-3p  |
| NCBP1 | hsa-miR-3547-5p  |
| NCBP1 | hsa-miR-505-3p.1 |
| NCBP1 | hsa-miR-367-3p   |
| NCBP1 | hsa-miR-4521     |
| NCBP1 | hsa-miR-3600     |
| NCBP1 | hsa-miR-344b-3p  |
| NCBP1 | hsa-miR-516b     |
| NCBP1 | hsa-miR-8081     |
| NCBP1 | hsa-miR-448-5p   |
| NCBP1 | hsa-miR-6967-3p  |
| NCBP1 | hsa-miR-4652-5p  |
| NCBP1 | hsa-miR-5108     |
| NCBP1 | hsa-miR-4499     |
| NCBP1 | hsa-miR-8796     |
| NCBP1 | hsa-miR-471-3p   |
| NCBP1 | hsa-miR-19       |
| NCBP1 | hsa-miR-4684-5p  |
| NCBP1 | hsa-miR-4651     |
| NCBP1 | hsa-miR-543-3p   |
| NCBP1 | hsa-miR-548o-5p  |
| NCBP1 | hsa-miR-223-5p   |
| NCBP1 | hsa-miR-340-3p   |
| NCBP1 | hsa-miR-7186-3p  |
| NCBP1 | hsa-miR-619-5p   |
| NCBP1 | hsa-miR-369-3p   |
| NCBP1 | hsa-miR-649      |
| NCBP1 | hsa-miR-295-5p   |
| NCBP1 | hsa-miR-5703     |
| NCBP1 | hsa-miR-142-3p.2 |
| NCBP1 | hsa-miR-7200-5p  |
| NCBP1 | hsa-miR-8118     |
| NCBP1 | hsa-miR-561-3p   |
| NCBP1 | hsa-miR-548ac    |
| NCBP1 | hsa-miR-4668-5p  |
| NCBP1 | hsa-miR-924      |
| NCBP1 | hsa-miR-8113     |
| NCBP1 | hsa-miR-608      |
| NCBP1 | hsa-miR-1290     |
| NCBP1 | hsa-miR-6238     |
| NCBP1 | hsa-miR-2904     |
| NCBP1 | hsa-miR-4255     |
| NCBP1 | hsa-miR-129-5p   |
| NCBP1 | hsa-miR-5700     |
| NCBP1 | hsa-miR-495-3p   |

|       |                  |
|-------|------------------|
| NCBP1 | hsa-miR-30-3p    |
| NCBP1 | hsa-miR-6858-3p  |
| NCBP1 | hsa-miR-6908-3p  |
| NCBP1 | hsa-miR-3071-5p  |
| NCBP1 | hsa-miR-4668-3p  |
| NCBP1 | hsa-miR-7267-3p  |
| NCBP1 | hsa-miR-548h-3p  |
| NCBP1 | hsa-miR-1976     |
| NCBP1 | hsa-miR-6750-3p  |
| NCBP1 | hsa-miR-5187-5p  |
| NCBP1 | hsa-miR-1468-3p  |
| NCBP1 | hsa-miR-449a-3p  |
| NCBP1 | hsa-miR-376c-3p  |
| NCBP1 | hsa-miR-3928-3p  |
| NCBP1 | hsa-miR-2447     |
| NCBP1 | hsa-miR-300      |
| NCBP1 | hsa-miR-1814a    |
| NCBP1 | hsa-miR-25-3p    |
| NCBP1 | hsa-miR-5681b    |
| NCBP1 | hsa-miR-7193-3p  |
| NCBP1 | hsa-miR-488-5p   |
| NCBP1 | hsa-miR-323-3p   |
| NCBP1 | hsa-miR-8903     |
| NCBP1 | hsa-miR-6806-3p  |
| NCBP1 | hsa-miR-6388     |
| NCBP1 | hsa-miR-669o-5p  |
| NCBP1 | hsa-miR-2114-3p  |
| NCBP1 | hsa-miR-3908     |
| NCBP1 | hsa-miR-5125-5p  |
| NCBP1 | hsa-miR-341-3p   |
| NCBP1 | hsa-miR-2406     |
| NCBP1 | hsa-miR-466mo-3p |
| NCBP1 | hsa-miR-707      |
| NCBP1 | hsa-miR-6165     |
| NCBP1 | hsa-miR-6870-5p  |
| NCBP1 | hsa-miR-222-3p   |
| NCBP1 | hsa-miR-4789-5p  |
| NCBP1 | hsa-miR-7079-3p  |
| NCBP1 | hsa-miR-7157-3p  |
| NCBP1 | hsa-miR-498      |
| NCBP1 | hsa-miR-8089     |
| NCBP1 | hsa-miR-6881-3p  |
| NCBP1 | hsa-miR-548au-5p |
| NCBP1 | hsa-miR-6989-5p  |
| NCBP1 | hsa-miR-450b-5p  |
| NCBP1 | hsa-miR-1968-5p  |

|       |                    |
|-------|--------------------|
| NCBP1 | hsa-miR-6798-5p    |
| NCBP1 | hsa-miR-8838       |
| NCBP1 | hsa-miR-4700-3p    |
| NCBP1 | hsa-miR-106        |
| NCBP1 | hsa-miR-1179       |
| NCBP1 | hsa-miR-7202-3p    |
| NCBP1 | hsa-miR-1-5p       |
| NCBP1 | hsa-miR-1892       |
| NCBP1 | hsa-miR-7671-5p    |
| NCBP1 | hsa-miR-122-5p     |
| NCBP1 | hsa-miR-3919       |
| NCBP1 | hsa-miR-20-5p      |
| NCBP1 | hsa-miR-888-5p     |
| NCBP1 | hsa-miR-6854-5p    |
| NCBP1 | hsa-miR-3958       |
| NCBP1 | hsa-miR-5623-3p    |
| NCBP1 | hsa-miR-7288-5p    |
| NCBP1 | hsa-miR-6760-3p    |
| NCBP1 | hsa-miR-3682-3p    |
| NCBP1 | hsa-miR-135-3p     |
| NCBP1 | hsa-miR-137-3p     |
| NCBP1 | hsa-miR-690        |
| NCBP1 | hsa-miR-202-3p     |
| NCBP1 | hsa-miR-6499-3p    |
| NCBP1 | hsa-miR-5000-3p    |
| NCBP1 | hsa-miR-2392       |
| NCBP1 | hsa-miR-125        |
| NCBP1 | hsa-miR-4690-5p    |
| NCBP1 | hsa-miR-369-3p     |
| NCBP1 | hsa-miR-548ap-3p   |
| NCBP1 | hsa-miR-4659a-3p   |
| NCBP1 | hsa-miR-7386i-5p   |
| NCBP1 | hsa-miR-1255b-2-3p |
| NCBP1 | hsa-miR-3664-3p    |
| NCBP1 | hsa-miR-548ar-3p   |
| NCBP1 | hsa-miR-3651       |
| NCBP1 | hsa-miR-590-3p     |
| NCBP1 | hsa-miR-2114-5p    |
| NCBP1 | hsa-miR-465c-5p    |
| NCBP1 | hsa-miR-4768-5p    |
| NCBP1 | hsa-miR-743-5p     |
| NCBP1 | hsa-miR-8881       |
| NCBP1 | hsa-miR-1298       |
| NCBP1 | hsa-miR-677        |
| NCBP1 | hsa-miR-4531       |
| NCBP1 | hsa-miR-7-5p       |

|       |                   |
|-------|-------------------|
| NCBP1 | hsa-miR-6523b     |
| NCBP1 | hsa-miR-1-3p      |
| NCBP1 | hsa-miR-7307-5p   |
| NCBP1 | hsa-miR-218-3p    |
| NCBP1 | hsa-miR-8817      |
| NCBP1 | hsa-miR-367-3p    |
| NCBP1 | hsa-miR-1232      |
| NCBP1 | hsa-miR-3173-3p   |
| NCBP1 | hsa-miR-7370-3p   |
| NCBP1 | hsa-miR-7386o-3p  |
| NCBP1 | hsa-miR-21-3p     |
| NCBP1 | hsa-miR-548aef    |
| NCBP1 | hsa-miR-517-5p    |
| NCBP1 | hsa-miR-500a-3p   |
| NCBP1 | hsa-miR-324       |
| NCBP1 | hsa-miR-302c-5p   |
| NCBP1 | hsa-miR-500b-3p   |
| NCBP1 | hsa-miR-1839-5p   |
| NCBP1 | hsa-miR-7026-5p   |
| NCBP1 | hsa-miR-29b-2-5p  |
| NCBP1 | hsa-miR-4791      |
| NCBP1 | hsa-miR-3617-5p   |
| NCBP1 | hsa-miR-3163      |
| NCBP1 | hsa-miR-7008-3p   |
| NCBP1 | hsa-miR-2410      |
| NCBP1 | hsa-miR-376e      |
| NCBP1 | hsa-miR-6843-3p   |
| NCBP1 | hsa-miR-3078-5p   |
| NCBP1 | hsa-miR-3572-3p   |
| NCBP1 | hsa-miR-449b-3p   |
| NCBP1 | hsa-miR-1277-5p   |
| NCBP1 | hsa-miR-881-5p    |
| NCBP1 | hsa-miR-151-3p    |
| NCBP1 | hsa-miR-1262-5p   |
| NCBP1 | hsa-miR-8070      |
| NCBP1 | hsa-miR-377-3p    |
| NCBP1 | hsa-miR-548h-5p   |
| NCBP1 | hsa-miR-670-3p    |
| NCBP1 | hsa-miR-4520-2-3p |
| NCBP1 | hsa-miR-106-3p    |
| NCBP1 | hsa-miR-6832-5p   |
| NCBP1 | hsa-miR-7650-3p   |
| NCBP1 | hsa-miR-6884-3p   |
| NCBP1 | hsa-miR-7245-3p   |
| NCBP1 | hsa-miR-511-3p    |
| NCBP1 | hsa-miR-627-5p    |

|       |                  |
|-------|------------------|
| NCBP1 | hsa-miR-505-3p   |
| NCBP1 | hsa-miR-6373     |
| NCBP1 | hsa-miR-3593-3p  |
| NCBP1 | hsa-miR-2382-5p  |
| NCBP1 | hsa-miR-634      |
| NCBP1 | hsa-miR-5011-5p  |
| NCBP1 | hsa-miR-6745     |
| NCBP1 | hsa-miR-7330-3p  |
| NCBP1 | hsa-miR-151      |
| NCBP1 | hsa-miR-384      |
| NCBP1 | hsa-miR-660-5p   |
| NCBP1 | hsa-miR-4423     |
| NCBP1 | hsa-miR-872      |
| NCBP1 | hsa-miR-2367-3p  |
| NCBP1 | hsa-miR-7043-3p  |
| NCBP1 | hsa-miR-4704-3p  |
| NCBP1 | hsa-miR-563      |
| NCBP1 | hsa-miR-8057     |
| NCBP1 | hsa-miR-4659b-5p |
| NCBP1 | hsa-miR-194-5p   |
| NCBP1 | hsa-miR-7386d-3p |
| NCBP1 | hsa-miR-548ak    |
| NCBP1 | hsa-miR-143-5p   |
| NCBP1 | hsa-miR-380      |
| NCBP1 | hsa-miR-3199     |
| NCBP1 | hsa-miR-3529-3p  |
| NCBP1 | hsa-miR-6826-3p  |
| NCBP1 | hsa-miR-2480     |
| NCBP1 | hsa-miR-3533     |
| NCBP1 | hsa-miR-4291     |
| NCBP1 | hsa-miR-6988-5p  |
| NCBP1 | hsa-miR-6890-5p  |
| NCBP1 | hsa-miR-32-5p    |
| NCBP1 | hsa-miR-339-5p   |
| NCBP1 | hsa-miR-200a-3p  |
| NCBP1 | hsa-miR-4422     |
| NCBP1 | hsa-miR-7341-5p  |
| NCBP1 | hsa-miR-8831     |
| NCBP1 | hsa-miR-2897     |
| NCBP1 | hsa-miR-5693     |
| NCBP1 | hsa-miR-6405     |
| NCBP1 | hsa-miR-5010-3p  |
| NCBP1 | hsa-miR-548aj-3p |
| NCBP1 | hsa-miR-524-5p   |
| NCBP1 | hsa-miR-3680-5p  |
| NCBP1 | hsa-miR-6990-3p  |

|       |                   |
|-------|-------------------|
| NCBP1 | hsa-miR-379-3p    |
| NCBP1 | hsa-miR-548g-3p   |
| NCBP1 | hsa-miR-302       |
| NCBP1 | hsa-miR-503-3p    |
| NCBP1 | hsa-miR-548aq-3p  |
| NCBP1 | hsa-miR-6512-5p   |
| NCBP1 | hsa-miR-6074      |
| NCBP1 | hsa-let-7a-2-3p   |
| NCBP1 | hsa-miR-6776-3p   |
| NCBP1 | hsa-miR-1322      |
| NCBP1 | hsa-miR-502a      |
| NCBP1 | hsa-miR-7154-5p   |
| NCBP1 | hsa-miR-125b-2-3p |
| NCBP1 | hsa-miR-7086-5p   |
| NCBP1 | hsa-miR-1266      |
| NCBP1 | hsa-miR-140-5p    |
| NCBP1 | hsa-miR-1236-3p   |
| NCBP1 | hsa-miR-880-3p    |
| NCBP1 | hsa-miR-7118-3p   |
| NCBP1 | hsa-miR-885       |
| NCBP1 | hsa-miR-24-3p     |
| NCBP1 | hsa-miR-508a      |
| NCBP1 | hsa-miR-518-5p    |
| NCBP1 | hsa-miR-607       |
| NCBP1 | hsa-miR-548d-5p   |
| NCBP1 | hsa-miR-2285x     |
| NCBP1 | hsa-miR-6955-3p   |
| NCBP1 | hsa-miR-3672      |
| NCBP1 | hsa-miR-2389      |
| NCBP1 | hsa-miR-4726-3p   |
| NCBP1 | hsa-miR-411a      |
| NCBP1 | hsa-miR-450a-2-3p |
| NCBP1 | hsa-miR-376c-5p   |
| NCBP1 | hsa-miR-7398u-3p  |
| NCBP1 | hsa-miR-148-3p    |
| NCBP1 | hsa-miR-4707-3p   |
| NCBP1 | hsa-miR-4328      |
| NCBP1 | hsa-miR-759       |
| NCBP1 | hsa-miR-496.2     |
| NCBP1 | hsa-miR-208a-3p   |
| NCBP1 | hsa-miR-6882-5p   |
| NCBP1 | hsa-miR-8813      |
| NCBP1 | hsa-miR-548aa     |
| NCBP1 | hsa-miR-548z      |
| NCBP1 | hsa-miR-3470b     |
| NCBP1 | hsa-miR-7203-5p   |

|       |                  |
|-------|------------------|
| NCBP1 | hsa-miR-154-3p   |
| NCBP1 | hsa-miR-6391     |
| NCBP1 | hsa-miR-6132     |
| NCBP1 | hsa-miR-4772-5p  |
| NCBP1 | hsa-miR-2285u    |
| NCBP1 | hsa-miR-7093-3p  |
| NCBP1 | hsa-miR-3127-5p  |
| NCBP1 | hsa-miR-31-3p    |
| NCBP1 | hsa-miR-3137     |
| NCBP1 | hsa-miR-548x-5p  |
| NCBP1 | hsa-miR-490-3p   |
| NCBP1 | hsa-miR-4725-3p  |
| NCBP1 | hsa-miR-4716-5p  |
| NCBP1 | hsa-miR-144-3p   |
| NCBP1 | hsa-miR-548at-5p |
| NCBP1 | hsa-miR-2370-3p  |
| NCBP1 | hsa-miR-4694-3p  |
| NCBP1 | hsa-miR-143-3p   |
| NCBP1 | hsa-miR-4637     |
| NCBP1 | hsa-miR-7063-5p  |
| NCBP1 | hsa-miR-4528     |
| NCBP1 | hsa-miR-4667     |
| NCBP1 | hsa-miR-10-5p    |
| NCBP1 | hsa-miR-6997-5p  |
| NCBP1 | hsa-miR-4477b    |
| NCBP1 | hsa-miR-7386m-3p |
| NCBP1 | hsa-miR-363-3p   |
| NCBP1 | hsa-miR-141-3p   |
| NCBP1 | hsa-miR-28-5p    |
| NCBP1 | hsa-miR-676-5p   |
| NCBP1 | hsa-miR-196c-3p  |
| NCBP1 | hsa-miR-2371     |
| NCBP1 | hsa-miR-6876-3p  |
| NCBP1 | hsa-miR-337-3p   |
| NCBP1 | hsa-miR-6417     |
| NCBP1 | hsa-miR-1180-5p  |
| NCBP1 | hsa-miR-4662-5p  |
| NCBP1 | hsa-miR-641      |
| NCBP1 | hsa-miR-4419b    |
| NCBP1 | hsa-let-7g-3p    |
| NCBP1 | hsa-miR-4775     |
| NCBP1 | hsa-miR-519-5p   |
| NCBP1 | hsa-miR-382-5p   |
| NCBP1 | hsa-miR-8810     |
| NCBP1 | hsa-miR-6131     |
| NCBP1 | hsa-miR-3069-3p  |



|       |                  |
|-------|------------------|
| NCBP1 | hsa-miR-144-5p   |
| NCBP1 | hsa-miR-2421     |
| NCBP1 | hsa-miR-2387     |
| NCBP1 | hsa-miR-1603     |
| NCBP1 | hsa-miR-877-5p   |
| NCBP1 | hsa-miR-3918     |
| NCBP1 | hsa-miR-3171     |
| NCBP1 | hsa-miR-1323-5p  |
| NCBP1 | hsa-miR-3140-3p  |
| NCBP1 | hsa-miR-382-5p   |
| NCBP1 | hsa-miR-5586-3p  |
| NCBP1 | hsa-miR-5095     |
| NCBP1 | hsa-miR-6945-3p  |
| NCBP1 | hsa-miR-7317-3p  |
| NCBP1 | hsa-miR-4284     |
| NCBP1 | hsa-miR-7-3p     |
| NCBP1 | hsa-miR-2052     |
| NCBP1 | hsa-miR-466b-5p  |
| NCBP1 | hsa-miR-2322-5p  |
| NCBP1 | hsa-miR-7168-5p  |
| NCBP1 | hsa-miR-2417     |
| NCBP1 | hsa-miR-584-5p   |
| NCBP1 | hsa-miR-5681a    |
| NCBP1 | hsa-miR-4667-5p  |
| NCBP1 | hsa-miR-6809-3p  |
| NCBP1 | hsa-miR-3127-5p  |
| NCBP1 | hsa-miR-373-3p   |
| NCBP1 | hsa-miR-17-3p    |
| NCBP1 | hsa-miR-668      |
| NCBP1 | hsa-miR-139-5p   |
| NCBP1 | hsa-miR-7225-3p  |
| NCBP1 | hsa-miR-4495     |
| NCBP1 | hsa-miR-152-3p   |
| NCBP1 | hsa-miR-1966-5p  |
| NCBP1 | hsa-miR-2284v    |
| NCBP1 | hsa-miR-8902     |
| NCBP1 | hsa-miR-8845     |
| NCBP1 | hsa-miR-186-3p   |
| NCBP1 | hsa-miR-218-5p   |
| NCBP1 | hsa-miR-4794     |
| NCBP1 | hsa-miR-19-3p    |
| NCBP1 | hsa-miR-3934-3p  |
| NCBP1 | hsa-miR-4662a-3p |
| NCBP1 | hsa-miR-335-5p   |
| NCBP1 | hsa-miR-2970-3p  |
| NCBP1 | hsa-miR-708-3p   |

|       |                   |
|-------|-------------------|
| NCBP1 | hsa-miR-190a-3p   |
| NCBP1 | hsa-miR-200c-5p   |
| NCBP1 | hsa-miR-6757-5p   |
| NCBP1 | hsa-miR-3090-3p   |
| NCBP1 | hsa-miR-4433a-3p  |
| NCBP1 | hsa-miR-5691      |
| NCBP1 | hsa-miR-3929      |
| NCBP1 | hsa-miR-516b-5p   |
| NCBP1 | hsa-miR-1296-3p   |
| NCBP1 | hsa-miR-2442      |
| NCBP1 | hsa-miR-291-5p    |
| NCBP1 | hsa-miR-1272      |
| NCBP1 | hsa-miR-6969-3p   |
| NCBP1 | hsa-miR-5089-5p   |
| NCBP1 | hsa-miR-3112-5p   |
| NCBP1 | hsa-miR-346       |
| NCBP1 | hsa-miR-675-3p    |
| NCBP1 | hsa-miR-7844-5p   |
| NCBP1 | hsa-miR-135b-3p   |
| NCBP1 | hsa-miR-6332      |
| NCBP1 | hsa-miR-7291-3p   |
| NCBP1 | hsa-miR-299-5p    |
| NCBP1 | hsa-miR-669a-3-3p |
| NCBP1 | hsa-miR-1542-3p   |
| NCBP1 | hsa-miR-8850      |
| NCBP1 | hsa-miR-3915      |
| NCBP1 | hsa-miR-1251      |
| NCBP1 | hsa-miR-5000-5p   |
| NCBP1 | hsa-miR-3121-3p   |
| NCBP1 | hsa-miR-330-3p    |
| NCBP1 | hsa-miR-2335      |
| NCBP1 | hsa-miR-3909      |
| NCBP1 | hsa-miR-6216      |
| NCBP1 | hsa-miR-550b-2-5p |
| NCBP1 | hsa-miR-6505-5p   |
| NCBP1 | hsa-miR-3973      |
| NCBP1 | hsa-miR-1265      |
| NCBP1 | hsa-miR-6904-5p   |
| NCBP1 | hsa-miR-2284n     |
| NCBP1 | hsa-miR-548a-3p   |
| NCBP1 | hsa-miR-7386k-3p  |
| NCBP1 | hsa-miR-6524      |
| NCBP1 | hsa-miR-6824-3p   |
| NCBP1 | hsa-miR-380-3p    |
| NCBP1 | hsa-miR-323a-3p   |
| NCBP1 | hsa-miR-216b-3p   |

|       |                  |
|-------|------------------|
| NCBP1 | hsa-miR-4750-3p  |
| NCBP1 | hsa-miR-4277     |
| NCBP1 | hsa-miR-4520-3p  |
| NCBP1 | hsa-miR-3580-3p  |
| NCBP1 | hsa-miR-802-5p   |
| NCBP1 | hsa-miR-133c     |
| NCBP1 | hsa-miR-7111-5p  |
| NCBP1 | hsa-miR-7119-3p  |
| NCBP1 | hsa-miR-548ar-5p |
| NCBP1 | hsa-miR-3065-5p  |
| NCBP1 | hsa-miR-138-3p   |
| NCBP1 | hsa-miR-5697     |
| NCBP1 | hsa-miR-501-3p   |
| NCBP1 | hsa-miR-374b-5p  |
| NCBP1 | hsa-miR-7281-3p  |
| NCBP1 | hsa-miR-6839-3p  |
| NCBP1 | hsa-miR-3084-5p  |
| NCBP1 | hsa-miR-3663-5p  |
| NCBP1 | hsa-miR-199-1-5p |
| NCBP1 | hsa-miR-3606-3p  |
| NCBP1 | hsa-miR-106-5p   |
| NCBP1 | hsa-miR-1844     |
| NCBP1 | hsa-miR-187-3p   |
| NCBP1 | hsa-miR-466i-3p  |
| NCBP1 | hsa-miR-548y     |
| NCBP1 | hsa-miR-466f-3p  |
| NCBP1 | hsa-miR-3145-3p  |
| NCBP1 | hsa-miR-23-3p    |
| NCBP1 | hsa-miR-6335     |
| NCBP1 | hsa-miR-7393-3p  |
| NCBP1 | hsa-miR-1251-5p  |
| NCBP1 | hsa-miR-4436b-5p |
| NCBP1 | hsa-miR-124-3p   |
| NCBP1 | hsa-miR-7211-5p  |
| NCBP1 | hsa-miR-532-3p   |
| NCBP1 | hsa-miR-470-5p   |
| NCBP1 | hsa-miR-1929-5p  |
| NCBP1 | hsa-miR-7850-5p  |
| NCBP1 | hsa-miR-3091-3p  |
| NCBP1 | hsa-miR-6902-5p  |
| NCBP1 | hsa-miR-222-5p   |
| NCBP1 | hsa-miR-139-3p   |
| NCBP1 | hsa-miR-4795-3p  |
| NCBP1 | hsa-miR-2488     |
| NCBP1 | hsa-miR-365a-3p  |
| NCBP1 | hsa-miR-1931     |

|       |                  |
|-------|------------------|
| NCBP1 | hsa-miR-2284-5p  |
| NCBP1 | hsa-miR-23c      |
| NCBP1 | hsa-miR-410-3p   |
| NCBP1 | hsa-miR-470-3p   |
| NCBP1 | hsa-miR-344h-3p  |
| NCBP1 | hsa-miR-2284l    |
| NCBP1 | hsa-miR-513a-3p  |
| NCBP1 | hsa-miR-1185-5p  |
| NCBP1 | hsa-miR-3089-3p  |
| NCBP1 | hsa-miR-5001-5p  |
| NCBP1 | hsa-miR-1206     |
| NCBP1 | hsa-miR-2284c    |
| NCBP1 | hsa-miR-5003-5p  |
| NCBP1 | hsa-miR-7343-3p  |
| NCBP1 | hsa-miR-4698     |
| NCBP1 | hsa-miR-1273d    |
| NCBP1 | hsa-miR-432-5p   |
| NCBP1 | hsa-miR-711      |
| NCBP1 | hsa-miR-3686     |
| NCBP1 | hsa-miR-669n     |
| NCBP1 | hsa-miR-672-3p   |
| NCBP1 | hsa-miR-371a-5p  |
| NCBP1 | hsa-miR-20b-3p   |
| NCBP1 | hsa-miR-7205-3p  |
| NCBP1 | hsa-miR-451b     |
| NCBP1 | hsa-miR-19-5p    |
| NCBP1 | hsa-miR-6974-3p  |
| NCBP1 | hsa-miR-6997-3p  |
| NCBP1 | hsa-miR-673-3p   |
| NCBP1 | hsa-miR-192-5p   |
| NCBP1 | hsa-miR-561-3p   |
| NCBP1 | hsa-miR-1540-5p  |
| NCBP1 | hsa-miR-7075-3p  |
| NCBP1 | hsa-miR-7394-3p  |
| NCBP1 | hsa-miR-365-3p   |
| NCBP1 | hsa-miR-96-3p    |
| NCBP1 | hsa-miR-599      |
| NCBP1 | hsa-miR-7315-5p  |
| NCBP1 | hsa-miR-548bb-3p |
| NCBP1 | hsa-miR-6975-5p  |
| NCBP1 | hsa-miR-146a-3p  |
| NCBP1 | hsa-miR-6730-3p  |
| NCBP1 | hsa-miR-342-3p   |
| NCBP1 | hsa-miR-1434-5p  |
| NCBP1 | hsa-miR-520gh    |
| NCBP1 | hsa-miR-6827-5p  |

|       |                 |
|-------|-----------------|
| NCBP1 | hsa-miR-8904a   |
| NCBP1 | hsa-miR-6080    |
| NCBP1 | hsa-miR-2110    |
| NCBP1 | hsa-miR-511-5p  |
| NCBP1 | hsa-miR-6536    |
| NCBP1 | hsa-miR-656     |
| NCBP1 | hsa-miR-6748-3p |
| NCBP1 | hsa-miR-6833-3p |
| NCBP1 | hsa-miR-1178-5p |
| NCBP1 | hsa-miR-490-3p  |
| NCBP1 | hsa-miR-6813-5p |
| NCBP1 | hsa-miR-587     |
| NCBP1 | hsa-miR-140-5p  |
| NCBP1 | hsa-miR-409     |
| NCBP1 | hsa-miR-512     |
| NCBP1 | hsa-miR-4261    |
| NCBP1 | hsa-miR-7296-5p |
| NCBP1 | hsa-miR-4476    |
| NCBP1 | hsa-miR-32-3p   |
| NCBP1 | hsa-miR-322-3p  |
| NCBP1 | hsa-miR-126-5p  |
| NCBP1 | hsa-miR-7-5p    |
| NCBP1 | hsa-miR-376ab   |
| NCBP1 | hsa-miR-6861-5p |
| NCBP1 | hsa-miR-302a-5p |
| NCBP1 | hsa-miR-1544-3p |
| NCBP1 | hsa-miR-709     |
| NCBP1 | hsa-miR-7231-5p |
| NCBP1 | hsa-miR-6821-3p |
| NCBP1 | hsa-miR-3161    |
| NCBP1 | hsa-miR-2681-3p |
| NCBP1 | hsa-miR-1905    |
| NCBP1 | hsa-miR-3550    |
| NCBP1 | hsa-miR-3925-5p |
| NCBP1 | hsa-miR-20      |
| NCBP1 | hsa-miR-8083    |
| NCBP1 | hsa-miR-876-5p  |
| NCBP1 | hsa-miR-3607-3p |
| NCBP1 | hsa-miR-7689-3p |
| NCBP1 | hsa-miR-8063    |
| NCBP1 | hsa-miR-548j-5p |
| NCBP1 | hsa-miR-511     |
| NCBP1 | hsa-miR-206-3p  |
| NCBP1 | hsa-let-7f-2-3p |
| NCBP1 | hsa-miR-606     |
| NCBP1 | hsa-miR-568     |

|       |                   |
|-------|-------------------|
| NCBP1 | hsa-miR-2296      |
| NCBP1 | hsa-miR-181b-1-3p |
| NCBP1 | hsa-miR-514a-3p   |
| NCBP1 | hsa-miR-4708-3p   |
| NCBP1 | hsa-miR-769-3p    |
| NCBP1 | hsa-miR-514a-5p   |
| NCBP1 | hsa-miR-6946-5p   |
| NCBP1 | hsa-miR-6072      |
| NCBP1 | hsa-miR-3121-3p   |
| NCBP1 | hsa-miR-628-3p    |
| NCBP1 | hsa-miR-548w      |
| NCBP1 | hsa-miR-5120      |
| NCBP1 | hsa-miR-132-3p    |
| NCBP1 | hsa-miR-101-3p    |
| NCBP1 | hsa-miR-20-3p     |
| NCBP1 | hsa-miR-3167-3p   |
| NCBP1 | hsa-miR-376a-3p   |
| NCBP1 | hsa-miR-570-3p    |
| NCBP1 | hsa-miR-7005-3p   |
| NCBP1 | hsa-miR-3153      |
| NCBP1 | hsa-miR-204-5p    |
| NCBP1 | hsa-miR-576-5p    |
| NCBP1 | hsa-miR-372-5p    |
| NCBP1 | hsa-miR-1185-3p   |
| NCBP1 | hsa-miR-3162-5p   |
| NCBP1 | hsa-miR-496b      |
| NCBP1 | hsa-miR-548az-5p  |
| NCBP1 | hsa-miR-5003-3p   |
| NCBP1 | hsa-miR-516-3p    |
| NCBP1 | hsa-miR-7382-3p   |
| NCBP1 | hsa-miR-548e-3p   |
| NCBP1 | hsa-miR-3671      |
| NCBP1 | hsa-miR-6790-3p   |
| NCBP1 | hsa-miR-7031-5p   |
| NCBP1 | hsa-miR-8840      |
| NCBP1 | hsa-miR-584-3p    |
| NCBP1 | hsa-miR-548x-3p   |
| NCBP1 | hsa-miR-2484      |
| NCBP1 | hsa-miR-548m      |
| NCBP1 | hsa-miR-5692bc    |
| NCBP1 | hsa-miR-660-3p    |
| NCBP1 | hsa-miR-181-3p    |
| NCBP1 | hsa-miR-7222-3p   |
| NCBP1 | hsa-miR-6787-3p   |
| NCBP1 | hsa-miR-7307-3p   |
| NCBP1 | hsa-miR-193b-3p   |

|       |                   |
|-------|-------------------|
| NCBP1 | hsa-miR-6856-5p   |
| NCBP1 | hsa-miR-625-3p    |
| NCBP1 | hsa-miR-302c-3p   |
| NCBP1 | hsa-miR-499b-5p   |
| NCBP1 | hsa-miR-7304-3p   |
| NCBP1 | hsa-miR-3571      |
| NCBP1 | hsa-miR-374       |
| NCBP1 | hsa-miR-665-3p    |
| NCBP1 | hsa-miR-22-3p     |
| NCBP1 | hsa-miR-7334-3p   |
| NCBP1 | hsa-miR-1805-5p   |
| NCBP1 | hsa-miR-4421      |
| NCBP1 | hsa-miR-7165-3p   |
| NCBP1 | hsa-miR-183-3p    |
| NCBP1 | hsa-miR-2366      |
| NCBP1 | hsa-miR-7651-5p   |
| NCBP1 | hsa-miR-1643b-5p  |
| NCBP1 | hsa-miR-345-3p    |
| NCBP1 | hsa-miR-4752      |
| NCBP1 | hsa-miR-363-5p    |
| NCBP1 | hsa-miR-7386n-3p  |
| NCBP1 | hsa-miR-489-5p    |
| NCBP1 | hsa-miR-320-3p    |
| NCBP1 | hsa-miR-872-3p    |
| NCBP1 | hsa-miR-33-3p     |
| NCBP1 | hsa-miR-6977-3p   |
| NCBP1 | hsa-miR-7266-5p   |
| NCBP1 | hsa-miR-8098      |
| NCBP1 | hsa-miR-548cej-3p |
| NCBP1 | hsa-miR-548j-3p   |
| NCBP1 | hsa-miR-3149      |
| NCBP1 | hsa-miR-154-5p    |
| NCBP1 | hsa-miR-488-3p    |
| NCBP1 | hsa-miR-450b      |
| NCBP1 | hsa-miR-1229-5p   |
| NCBP1 | hsa-miR-7182-3p   |
| NCBP1 | hsa-miR-6501-3p   |
| NCBP1 | hsa-miR-4430      |
| NCBP1 | hsa-miR-519       |
| NCBP1 | hsa-miR-520       |
| NCBP1 | hsa-miR-4492      |
| NCBP1 | hsa-miR-6962-5p   |
| NCBP1 | hsa-miR-93-3p     |
| NCBP1 | hsa-miR-9a-3p     |
| NCBP1 | hsa-miR-6891-3p   |
| NCBP1 | hsa-miR-150-5p    |

|       |                  |
|-------|------------------|
| NCBP1 | hsa-miR-4659b-3p |
| NCBP1 | hsa-miR-6853-3p  |
| NCBP1 | hsa-miR-4699-3p  |
| NCBP1 | hsa-miR-6525     |
| NCBP1 | hsa-miR-3144-3p  |
| NCBP1 | hsa-miR-548aj-5p |
| NCBP1 | hsa-miR-448      |
| NCBP1 | hsa-miR-7172-3p  |
| NCBP1 | hsa-miR-6864-3p  |
| NCBP1 | hsa-miR-8869     |
| NCBP1 | hsa-miR-6875-3p  |
| NCBP1 | hsa-miR-762      |
| NCBP1 | hsa-miR-7681-3p  |
| NCBP1 | hsa-miR-512-3p   |
| NCBP1 | hsa-miR-6974-5p  |
| NCBP1 | hsa-miR-4524a-3p |
| NCBP1 | hsa-miR-7975     |
| NCBP1 | hsa-miR-181-5p   |
| NCBP1 | hsa-miR-3064-3p  |
| NCBP1 | hsa-miR-383      |
| NCBP1 | hsa-miR-548c-5p  |
| NCBP1 | hsa-miR-7157-5p  |
| NCBP1 | hsa-miR-9-3-3p   |
| NCBP1 | hsa-miR-3658     |
| NCBP1 | hsa-miR-291      |
| NCBP1 | hsa-miR-294      |
| NCBP1 | hsa-miR-8803     |
| NCBP1 | hsa-miR-215      |
| NCBP1 | hsa-miR-6869-5p  |
| NCBP1 | hsa-miR-3108-3p  |
| NCBP1 | hsa-miR-6852-5p  |
| NCBP1 | hsa-miR-656-3p   |
| NCBP1 | hsa-miR-7000-3p  |
| NCBP1 | hsa-miR-154a     |
| NCBP1 | hsa-miR-5004-3p  |
| NCBP1 | hsa-miR-2319     |
| NCBP1 | hsa-miR-491-5p   |
| NCBP1 | hsa-miR-7177-5p  |
| NCBP1 | hsa-miR-2460     |
| NCBP1 | hsa-miR-4735-5p  |
| NCBP1 | hsa-miR-548t-5p  |
| NCBP1 | hsa-miR-7977     |
| NCBP1 | hsa-miR-342-3p   |
| NCBP1 | hsa-miR-4478     |
| NCBP1 | hsa-miR-1208     |
| NCBP1 | hsa-miR-411-5p.1 |



|       |                  |
|-------|------------------|
| NCBP1 | hsa-miR-153      |
| NCBP1 | hsa-miR-4804-3p  |
| NCBP1 | hsa-miR-7213-3p  |
| NCBP1 | hsa-miR-3622b-3p |
| NCBP1 | hsa-miR-126a-5p  |
| NCBP1 | hsa-miR-1301-5p  |
| NCBP1 | hsa-miR-1283a    |
| NCBP1 | hsa-miR-6340     |
| NCBP1 | hsa-miR-143-3p   |
| NCBP1 | hsa-miR-146-5p   |
| NCBP1 | hsa-miR-4279     |
| NCBP1 | hsa-miR-5011-3p  |
| NCBP1 | hsa-miR-190b-3p  |
| NCBP1 | hsa-miR-218-5p   |
| NCBP1 | hsa-miR-362-5p   |
| NCBP1 | hsa-miR-3652     |
| NCBP1 | hsa-miR-8812     |
| NCBP1 | hsa-miR-518-3p   |
| NCBP1 | hsa-miR-7337-3p  |
| NCBP1 | hsa-miR-504-5p   |
| NCBP1 | hsa-miR-200-3p   |
| NCBP1 | hsa-miR-7057-5p  |
| NCBP1 | hsa-miR-4776-3p  |
| NCBP1 | hsa-miR-103-5p   |
| NCBP1 | hsa-miR-1231     |
| NCBP1 | hsa-miR-450b-3p  |
| NCBP1 | hsa-miR-7071-5p  |
| NCBP1 | hsa-miR-548i     |
| NCBP1 | hsa-miR-2284ab   |
| NCBP1 | hsa-miR-2278     |
| NCBP1 | hsa-miR-7398a-3p |
| NCBP1 | hsa-miR-194-3p   |
| NCBP1 | hsa-miR-1303     |
| NCBP1 | hsa-miR-6885-3p  |
| NCBP1 | hsa-miR-548ap-5p |
| NCBP1 | hsa-miR-1185-5p  |
| NCBP1 | hsa-miR-129b-5p  |
| NCBP1 | hsa-miR-188-5p   |
| NCBP1 | hsa-miR-1324     |
| NCBP1 | hsa-miR-7371d-5p |
| NCBP1 | hsa-miR-4999-3p  |
| NCBP1 | hsa-miR-320a     |
| NCBP1 | hsa-miR-5590-5p  |
| NCBP1 | hsa-miR-3074-3p  |
| NCBP1 | hsa-miR-7668-3p  |
| NCBP1 | hsa-miR-767-5p   |

|       |                  |
|-------|------------------|
| NCBP1 | hsa-miR-1304-3p  |
| NCBP1 | hsa-miR-208-3p   |
| NCBP1 | hsa-miR-1306-5p  |
| NCBP1 | hsa-miR-3653-3p  |
| NCBP1 | hsa-miR-7012-5p  |
| NCBP1 | hsa-miR-8898     |
| NCBP1 | hsa-miR-2343     |
| NCBP1 | hsa-miR-4477a    |
| NCBP1 | hsa-miR-6856-3p  |
| NCBP1 | hsa-miR-548p     |
| NCBP1 | hsa-miR-2284j    |
| NCBP1 | hsa-miR-1224     |
| NCBP1 | hsa-miR-135ab-3p |
| NCBP1 | hsa-miR-329-3p   |
| NCBP1 | hsa-miR-3586-5p  |
| NCBP1 | hsa-miR-8060     |
| NCBP1 | hsa-miR-3132     |
| NCBP1 | hsa-miR-7045-3p  |
| NCBP1 | hsa-miR-378a-5p  |
| NCBP1 | hsa-miR-4704-5p  |
| NCBP1 | hsa-miR-8825     |
| NCBP1 | hsa-miR-665      |
| NCBP1 | hsa-miR-3200-5p  |
| NCBP1 | hsa-miR-30a-3p   |
| NCBP1 | hsa-miR-7011-3p  |
| NCBP1 | hsa-miR-1-3p     |
| NCBP1 | hsa-miR-6715-3p  |
| NCBP1 | hsa-miR-1226-3p  |
| NCBP1 | hsa-miR-7234-5p  |
| NCBP1 | hsa-miR-6366     |
| NCBP1 | hsa-miR-130b-5p  |
| NCBP1 | hsa-miR-30-5p    |
| NCBP1 | hsa-miR-550-5p   |
| NCBP1 | hsa-miR-199      |
| NCBP1 | hsa-miR-7262-3p  |
| NCBP2 | hsa-miR-148a-5p  |
| NCBP2 | hsa-miR-879-5p   |
| NCBP2 | hsa-miR-3082-3p  |
| NCBP2 | hsa-miR-669b-5p  |
| NCBP2 | hsa-miR-7-3p     |
| NCBP2 | hsa-miR-344-3p   |
| NCBP2 | hsa-miR-494-3p   |
| NCBP2 | hsa-miR-483-3p   |
| NCBP2 | hsa-miR-6418-5p  |
| NCBP2 | hsa-miR-326-3p   |
| NCBP2 | hsa-miR-203b-5p  |

|       |                  |
|-------|------------------|
| NCBP2 | hsa-miR-6832-3p  |
| NCBP2 | hsa-miR-7398s-3p |
| NCBP2 | hsa-miR-3157-5p  |
| NCBP2 | hsa-miR-147-5p   |
| NCBP2 | hsa-miR-466b-5p  |
| NCBP2 | hsa-miR-509-3p   |
| NCBP2 | hsa-miR-545-5p   |
| NCBP2 | hsa-miR-6800-5p  |
| NCBP2 | hsa-miR-1839     |
| NCBP2 | hsa-miR-3653-5p  |
| NCBP2 | hsa-miR-706      |
| NCBP2 | hsa-miR-2358     |
| NCBP2 | hsa-miR-8838     |
| NCBP2 | hsa-miR-1668     |
| NCBP2 | hsa-miR-2468     |
| NCBP2 | hsa-miR-291-5p   |
| NCBP2 | hsa-miR-135-5p   |
| NCBP2 | hsa-miR-129-5p   |
| NCBP2 | hsa-miR-6338     |
| NCBP2 | hsa-miR-101-3p.2 |
| NCBP2 | hsa-miR-3938-3p  |
| NCBP2 | hsa-miR-3171     |
| NCBP2 | hsa-miR-7152-5p  |
| NCBP2 | hsa-miR-4446-5p  |
| NCBP2 | hsa-miR-4750-3p  |
| NCBP2 | hsa-miR-21-5p    |
| NCBP2 | hsa-miR-183-5p   |
| NCBP2 | hsa-miR-363-3p   |
| NCBP2 | hsa-miR-7221-5p  |
| NCBP2 | hsa-miR-744-3p   |
| NCBP2 | hsa-miR-7042-5p  |
| NCBP2 | hsa-miR-494      |
| NCBP2 | hsa-miR-4493     |
| NCBP2 | hsa-miR-3154     |
| NCBP2 | hsa-miR-6746-5p  |
| NCBP2 | hsa-miR-4683     |
| NCBP2 | hsa-miR-2284-5p  |
| NCBP2 | hsa-miR-7192-3p  |
| NCBP2 | hsa-miR-2284d    |
| NCBP2 | hsa-miR-7850-5p  |
| NCBP2 | hsa-miR-1584-3p  |
| NCBP2 | hsa-miR-1892     |
| NCBP2 | hsa-miR-7074-5p  |
| NCBP2 | hsa-miR-7288-3p  |
| NCBP2 | hsa-miR-6966-3p  |
| NCBP2 | hsa-miR-3073a-3p |

|       |                  |
|-------|------------------|
| NCBP2 | hsa-miR-6908-5p  |
| NCBP2 | hsa-miR-6973a-3p |
| NCBP2 | hsa-miR-3659     |
| NCBP2 | hsa-miR-378      |
| NCBP2 | hsa-miR-7172-3p  |
| NCBP2 | hsa-miR-498      |
| NCBP2 | hsa-miR-4460     |
| NCBP2 | hsa-miR-3152-3p  |
| NCBP2 | hsa-miR-16-3p    |
| NCBP2 | hsa-miR-1958     |
| NCBP2 | hsa-miR-93-3p    |
| NCBP2 | hsa-miR-8085     |
| NCBP2 | hsa-miR-3680-3p  |
| NCBP2 | hsa-miR-378-3p   |
| NCBP2 | hsa-miR-3654     |
| NCBP2 | hsa-miR-642      |
| NCBP2 | hsa-miR-877-5p   |
| NCBP2 | hsa-miR-548bb-3p |
| NCBP2 | hsa-miR-942-5p   |
| NCBP2 | hsa-miR-3162-3p  |
| NCBP2 | hsa-miR-6903-5p  |
| NCBP2 | hsa-miR-6350     |
| NCBP2 | hsa-miR-2406     |
| NCBP2 | hsa-miR-19       |
| NCBP2 | hsa-miR-6404     |
| NCBP2 | hsa-miR-655      |
| NCBP2 | hsa-miR-9-3-3p   |
| NCBP2 | hsa-miR-888-5p   |
| NCBP2 | hsa-miR-7229-3p  |
| NCBP2 | hsa-miR-518-5p   |
| NCBP2 | hsa-miR-873-5p   |
| NCBP2 | hsa-let-7-3p     |
| NCBP2 | hsa-miR-6988-3p  |
| NCBP2 | hsa-miR-873a-3p  |
| NCBP2 | hsa-miR-6326     |
| NCBP2 | hsa-miR-216a     |
| NCBP2 | hsa-miR-3133     |
| NCBP2 | hsa-miR-548ah-3p |
| NCBP2 | hsa-miR-592-5p   |
| NCBP2 | hsa-miR-5007-3p  |
| NCBP2 | hsa-miR-4639-5p  |
| NCBP2 | hsa-miR-877-3p   |
| NCBP2 | hsa-miR-1208     |
| NCBP2 | hsa-miR-4709-5p  |
| NCBP2 | hsa-miR-222-5p   |
| NCBP2 | hsa-miR-582-5p   |

|       |                  |
|-------|------------------|
| NCBP2 | hsa-miR-549-3p   |
| NCBP2 | hsa-miR-1304-5p  |
| NCBP2 | hsa-miR-340-5p   |
| NCBP2 | hsa-miR-222-3p   |
| NCBP2 | hsa-miR-636      |
| NCBP2 | hsa-miR-208a-3p  |
| NCBP2 | hsa-miR-598-3p   |
| NCBP2 | hsa-miR-205-3p   |
| NCBP2 | hsa-miR-548bd-3p |
| NCBP2 | hsa-miR-4270     |
| NCBP2 | hsa-miR-129-2-3p |
| NCBP2 | hsa-miR-6381     |
| NCBP2 | hsa-miR-148b-5p  |
| NCBP2 | hsa-miR-344      |
| NCBP2 | hsa-miR-141-5p   |
| NCBP2 | hsa-miR-126-3p.2 |
| NCBP2 | hsa-miR-520gh    |
| NCBP2 | hsa-miR-6955-3p  |
| NCBP2 | hsa-miR-3120-5p  |
| NCBP2 | hsa-miR-548c-3p  |
| NCBP2 | hsa-miR-487b-5p  |
| NCBP2 | hsa-miR-6795-3p  |
| NCBP2 | hsa-miR-802      |
| NCBP2 | hsa-miR-330-3p   |
| NCBP2 | hsa-miR-6499-3p  |
| NCBP2 | hsa-miR-425      |
| NCBP2 | hsa-miR-616-5p   |
| NCBP2 | hsa-miR-2431-5p  |
| NCBP2 | hsa-miR-452-3p   |
| NCBP2 | hsa-miR-1388-5p  |
| NCBP2 | hsa-miR-6072     |
| NCBP2 | hsa-miR-6616-5p  |
| NCBP2 | hsa-miR-486-5p   |
| NCBP2 | hsa-miR-431-5p   |
| NCBP2 | hsa-miR-2883     |
| NCBP2 | hsa-miR-7194-3p  |
| NCBP2 | hsa-miR-1267     |
| NCBP2 | hsa-miR-3542     |
| NCBP2 | hsa-miR-5699-5p  |
| NCBP2 | hsa-miR-150-5p   |
| NCBP2 | hsa-miR-942-3p   |
| NCBP2 | hsa-miR-7114-5p  |
| NCBP2 | hsa-miR-6943-3p  |
| NCBP2 | hsa-miR-6912-3p  |
| NCBP2 | hsa-miR-219-5p   |
| NCBP2 | hsa-miR-1237-3p  |

|       |                   |
|-------|-------------------|
| NCBP2 | hsa-miR-759       |
| NCBP2 | hsa-miR-3586-3p   |
| NCBP2 | hsa-miR-499b-5p   |
| NCBP2 | hsa-miR-344g-3p   |
| NCBP2 | hsa-miR-425-5p    |
| NCBP2 | hsa-miR-1324      |
| NCBP2 | hsa-miR-4291      |
| NCBP2 | hsa-miR-605-3p    |
| NCBP2 | hsa-miR-136-5p    |
| NCBP2 | hsa-miR-101-3p.1  |
| NCBP2 | hsa-miR-6736-3p   |
| NCBP2 | hsa-miR-6501-5p   |
| NCBP2 | hsa-miR-6960-3p   |
| NCBP2 | hsa-miR-2113      |
| NCBP2 | hsa-miR-877-5p    |
| NCBP2 | hsa-miR-3081-5p   |
| NCBP2 | hsa-miR-7214-5p   |
| NCBP2 | hsa-miR-125b-2-3p |
| NCBP2 | hsa-miR-1639      |
| NCBP2 | hsa-miR-7386g-3p  |
| NCBP2 | hsa-miR-1188-5p   |
| NCBP2 | hsa-miR-7166-3p   |
| NCBP2 | hsa-miR-24-5p     |
| NCBP2 | hsa-miR-510-3p    |
| NCBP2 | hsa-miR-499b-3p   |
| NCBP2 | hsa-miR-513a      |
| NCBP2 | hsa-miR-642a-5p   |
| NCBP2 | hsa-miR-7371b-5p  |
| NCBP2 | hsa-miR-548at-3p  |
| NCBP2 | hsa-miR-511-5p    |
| NCBP2 | hsa-miR-3692-5p   |
| NCBP2 | hsa-miR-548       |
| NCBP2 | hsa-miR-4490      |
| NCBP2 | hsa-miR-4689      |
| NCBP2 | hsa-miR-5685      |
| NCBP2 | hsa-miR-6505-5p   |
| NCBP2 | hsa-miR-6883-3p   |
| NCBP2 | hsa-miR-873-5p.2  |
| NCBP2 | hsa-miR-6728-5p   |
| NCBP2 | hsa-miR-1562-5p   |
| NCBP2 | hsa-miR-6935-3p   |
| NCBP2 | hsa-miR-548am-3p  |
| NCBP2 | hsa-miR-539-5p    |
| NCBP2 | hsa-miR-376ab-3p  |
| NCBP2 | hsa-miR-653-5p    |
| NCBP2 | hsa-miR-217       |

|       |                 |
|-------|-----------------|
| NCBP2 | hsa-miR-329     |
| NCBP2 | hsa-miR-190a-3p |
| NCBP2 | hsa-miR-204-5p  |
| NCBP2 | hsa-miR-1546-5p |
| NCBP2 | hsa-miR-31-3p   |
| NCBP2 | hsa-miR-631     |
| NCBP2 | hsa-miR-873-5p  |
| NCBP2 | hsa-miR-105b    |
| NCBP2 | hsa-miR-29b-5p  |
| NCBP2 | hsa-miR-561-3p  |
| NCBP2 | hsa-miR-331-3p  |
| NCBP2 | hsa-miR-7059-3p |
| NCBP2 | hsa-miR-2297    |
| NCBP2 | hsa-miR-2400    |
| NCBP2 | hsa-miR-190-3p  |
| NCBP2 | hsa-miR-500b-5p |
| NCBP2 | hsa-miR-30-5p   |
| NCBP2 | hsa-miR-548an   |
| NCBP2 | hsa-miR-8097    |
| NCBP2 | hsa-miR-1298    |
| NCBP2 | hsa-miR-141-3p  |
| NCBP2 | hsa-miR-8073    |
| NCBP2 | hsa-miR-3112-5p |
| NCBP2 | hsa-miR-5100    |
| NCBP2 | hsa-miR-7657-3p |
| NCBP2 | hsa-miR-7053-5p |
| NCBP2 | hsa-miR-211-3p  |
| NCBP2 | hsa-miR-7670-5p |
| NCBP2 | hsa-miR-520     |
| NCBP2 | hsa-miR-539-5p  |
| NCBP2 | hsa-miR-3685    |
| NCBP2 | hsa-miR-1225-3p |
| NCBP2 | hsa-miR-185-5p  |
| NCBP2 | hsa-miR-3915    |
| NCBP2 | hsa-miR-487a-5p |
| NCBP2 | hsa-miR-4289    |
| NCBP2 | hsa-miR-325-3p  |
| NCBP2 | hsa-miR-26a-3p  |
| NCBP2 | hsa-miR-1812-3p |
| NCBP2 | hsa-miR-499a-3p |
| NCBP2 | hsa-miR-433     |
| NCBP2 | hsa-miR-224-3p  |
| NCBP2 | hsa-miR-6504-3p |
| NCBP2 | hsa-miR-495-3p  |
| NCBP2 | hsa-miR-6507-5p |
| NCBP2 | hsa-miR-136-5p  |

|       |                   |
|-------|-------------------|
| NCBP2 | hsa-miR-383-5p.2  |
| NCBP2 | hsa-miR-7646-3p   |
| NCBP2 | hsa-miR-299       |
| NCBP2 | hsa-miR-194-5p    |
| NCBP2 | hsa-miR-6969-5p   |
| NCBP2 | hsa-miR-1603      |
| NCBP2 | hsa-miR-661       |
| NCBP2 | hsa-miR-4686      |
| NCBP2 | hsa-miR-3074-5p   |
| NCBP2 | hsa-miR-3074-3p   |
| NCBP2 | hsa-miR-495-3p    |
| NCBP2 | hsa-miR-2287      |
| NCBP2 | hsa-miR-2285x     |
| NCBP2 | hsa-miR-548h-3p   |
| NCBP2 | hsa-miR-871-3p    |
| NCBP2 | hsa-miR-344d-2-5p |
| NCBP2 | hsa-miR-3569-5p   |
| NCBP2 | hsa-miR-27-3p     |
| NCBP2 | hsa-miR-7012-3p   |
| NCBP2 | hsa-miR-6744-3p   |
| NCBP2 | hsa-miR-514b-5p   |
| NCBP2 | hsa-miR-599       |
| NCBP2 | hsa-miR-1897-5p   |
| NCBP2 | hsa-miR-656       |
| NCBP2 | hsa-miR-6854-5p   |
| NCBP2 | hsa-miR-2114-3p   |
| NCBP2 | hsa-miR-4726-3p   |
| NCBP2 | hsa-miR-191-3p    |
| NCBP2 | hsa-miR-1270      |
| NCBP2 | hsa-miR-6866-5p   |
| NCBP2 | hsa-miR-25-3p     |
| NCBP2 | hsa-miR-450a-1-3p |
| NCBP2 | hsa-miR-8854      |
| NCBP2 | hsa-miR-1190      |
| NCBP2 | hsa-miR-526       |
| NCBP2 | hsa-miR-4420      |
| NCBP2 | hsa-miR-2284n     |
| NCBP2 | hsa-miR-6913-3p   |
| NCBP2 | hsa-miR-6858-5p   |
| NCBP2 | hsa-miR-7152-3p   |
| NCBP2 | hsa-miR-6793-3p   |
| NCBP2 | hsa-miR-26-5p     |
| NCBP2 | hsa-miR-1692      |
| NCBP2 | hsa-miR-3079-3p   |
| NCBP2 | hsa-miR-344b-3p   |
| NCBP2 | hsa-miR-186-5p    |



|       |                      |
|-------|----------------------|
| NCBP2 | hsa-miR-372-5p       |
| NCBP2 | hsa-miR-513a-5p      |
| NCBP2 | hsa-miR-5617-5p      |
| NCBP2 | hsa-miR-4433b-3p     |
| NCBP2 | hsa-miR-4424         |
| NCBP2 | hsa-miR-467eh-5p     |
| NCBP2 | hsa-miR-7159-5p      |
| NCBP2 | hsa-miR-680          |
| NCBP2 | hsa-miR-7237-3p      |
| NCBP2 | hsa-miR-548ae-3p     |
| NCBP2 | hsa-miR-935          |
| NCBP2 | hsa-miR-6385         |
| NCBP2 | hsa-miR-8841         |
| NCBP2 | hsa-miR-377-5p       |
| NCBP2 | hsa-miR-2902         |
| NCBP2 | hsa-miR-6830-3p      |
| NCBP2 | hsa-miR-7180-3p      |
| NCBP2 | hsa-miR-8068         |
| NCBP2 | hsa-miR-1252-5p      |
| NCBP2 | hsa-miR-208-3p       |
| NCBP2 | hsa-miR-676-5p       |
| NCBP2 | hsa-miR-557          |
| NCBP2 | hsa-miR-411-3p       |
| NCBP2 | hsa-miR-4758-3p      |
| NCBP2 | hsa-miR-3102-3p.2-3p |
| NCBP2 | hsa-miR-6876-5p      |
| NCBP2 | hsa-miR-548z         |
| NCBP2 | hsa-miR-669e-5p      |
| NCBP2 | hsa-miR-33-5p        |
| NCBP2 | hsa-miR-6891-3p      |
| NCBP2 | hsa-miR-5093         |
| NCBP2 | hsa-let-7a-2-3p      |
| NCBP2 | hsa-miR-655-5p       |
| NCBP2 | hsa-miR-212-5p       |
| NCBP2 | hsa-miR-3163         |
| NCBP2 | hsa-miR-382-3p       |
| NCBP2 | hsa-miR-374c-5p      |
| NCBP2 | hsa-miR-124-3p.2     |
| NCBP2 | hsa-miR-4484         |
| NCBP2 | hsa-miR-33a-3p       |
| NCBP2 | hsa-miR-6758-5p      |
| NCBP2 | hsa-miR-449-5p       |
| NCBP2 | hsa-miR-101a-3p.2    |
| NCBP2 | hsa-miR-449c-5p      |
| NCBP2 | hsa-miR-187-5p       |
| NCBP2 | hsa-miR-1243         |

|       |                  |
|-------|------------------|
| NCBP2 | hsa-miR-5626-5p  |
| NCBP2 | hsa-miR-6720-5p  |
| NCBP2 | hsa-miR-2284m    |
| NCBP2 | hsa-miR-4643     |
| NCBP2 | hsa-miR-3166     |
| NCBP2 | hsa-miR-3473f    |
| NCBP2 | hsa-miR-497-3p   |
| NCBP2 | hsa-miR-671-5p   |
| NCBP2 | hsa-miR-574-5p   |
| NCBP2 | hsa-miR-4280     |
| NCBP2 | hsa-miR-6790-3p  |
| NCBP2 | hsa-miR-7021-3p  |
| NCBP2 | hsa-miR-2284c    |
| NCBP2 | hsa-miR-548aw    |
| NCBP2 | hsa-miR-7469-3p  |
| NCBP2 | hsa-miR-3190-5p  |
| NCBP2 | hsa-miR-3714     |
| NCBP2 | hsa-miR-337-3p   |
| NCBP2 | hsa-miR-4677-3p  |
| NCBP2 | hsa-miR-450b     |
| NCBP2 | hsa-miR-548ay-3p |
| NCBP2 | hsa-miR-10a-3p   |
| NCBP2 | hsa-miR-7309-3p  |
| NCBP2 | hsa-miR-6754-5p  |
| NCBP2 | hsa-miR-3577-3p  |
| NCBP2 | hsa-miR-6359     |
| NCBP2 | hsa-miR-6821-3p  |
| NCBP2 | hsa-miR-424-3p   |
| NCBP2 | hsa-miR-34bc-3p  |
| NCBP2 | hsa-miR-194-5p   |
| NCBP2 | hsa-miR-548ac    |
| NCBP2 | hsa-miR-3938     |
| NCBP2 | hsa-miR-7156-5p  |
| NCBP2 | hsa-miR-4682     |
| NCBP2 | hsa-miR-1933-3p  |
| NCBP2 | hsa-miR-34-5p    |
| NCBP2 | hsa-miR-1241     |
| NCBP2 | hsa-miR-656-3p   |
| NCBP2 | hsa-miR-384      |
| NCBP2 | hsa-miR-192-5p   |
| NCBP2 | hsa-miR-185-5p   |
| NCBP2 | hsa-miR-5186     |
| NCBP2 | hsa-miR-6792-3p  |
| NCBP2 | hsa-miR-325      |
| NCBP2 | hsa-miR-4735-5p  |
| NCBP2 | hsa-miR-2114-5p  |

|       |                   |
|-------|-------------------|
| NCBP2 | hsa-miR-548d-5p   |
| NCBP2 | hsa-miR-8058      |
| NCBP2 | hsa-miR-455-3p.1  |
| NCBP2 | hsa-miR-200bc     |
| NCBP2 | hsa-miR-4762-3p   |
| NCBP2 | hsa-miR-1-3p      |
| NCBP2 | hsa-miR-3926      |
| NCBP2 | hsa-miR-4323      |
| NCBP2 | hsa-miR-1273h-3p  |
| NCBP2 | hsa-miR-375       |
| NCBP2 | hsa-miR-4302      |
| NCBP2 | hsa-miR-101b-3p.2 |
| NCBP2 | hsa-miR-6760-3p   |
| NCBP2 | hsa-miR-2390      |
| NCBP2 | hsa-miR-545-3p    |
| NCBP2 | hsa-miR-505-3p    |
| NCBP2 | hsa-miR-590-5p    |
| NCBP2 | hsa-miR-4668-5p   |
| NCBP2 | hsa-miR-2356      |
| NCBP2 | hsa-miR-1914-5p   |
| NCBP2 | hsa-miR-7350-3p   |
| NCBP2 | hsa-miR-381-3p    |
| NCBP2 | hsa-miR-6131      |
| NCBP2 | hsa-miR-429       |
| NCBP2 | hsa-miR-127-5p    |
| NCBP2 | hsa-miR-2115-5p   |
| NCBP2 | hsa-miR-2284q     |
| NCBP2 | hsa-miR-19-5p     |
| NCBP2 | hsa-miR-19-3p     |
| NCBP2 | hsa-miR-3547-5p   |
| NCBP2 | hsa-miR-5579-5p   |
| NCBP2 | hsa-miR-463-5p    |
| NCBP2 | hsa-miR-7092-3p   |
| NCBP2 | hsa-miR-1243-5p   |
| NCBP2 | hsa-miR-590-3p    |
| NCBP2 | hsa-miR-499b-3p   |
| NCBP2 | hsa-miR-8871      |
| NCBP2 | hsa-miR-4691-5p   |
| NCBP2 | hsa-miR-133c      |
| NCBP2 | hsa-miR-92-3p     |
| NCBP2 | hsa-miR-7164-5p   |
| NCBP2 | hsa-miR-885       |
| NCBP2 | hsa-miR-642-3p    |
| NCBP2 | hsa-miR-4441      |
| NCBP2 | hsa-miR-7350-5p   |
| NCBP2 | hsa-miR-4781-3p   |

|       |                 |
|-------|-----------------|
| NCBP2 | hsa-miR-6405    |
| NCBP2 | hsa-miR-4263    |
| NCBP2 | hsa-let-7f-2-3p |
| NCBP2 | hsa-miR-7179-3p |
| NCBP2 | hsa-miR-943     |
| NCBP2 | hsa-miR-7191-5p |
| NCBP2 | hsa-miR-567     |
| NCBP2 | hsa-miR-9-3p    |
| NCBP2 | hsa-miR-4256    |
| NCBP2 | hsa-miR-2285j   |
| NCBP2 | hsa-miR-874-3p  |
| NCBP2 | hsa-miR-137-3p  |
| NCBP2 | hsa-miR-7222-3p |
| NCBP2 | hsa-miR-6537-5p |
| NCBP2 | hsa-miR-3660    |
| NCBP2 | hsa-miR-690     |
| NCBP2 | hsa-miR-527     |
| NCBP2 | hsa-miR-4743-3p |
| NCBP2 | hsa-miR-3580-5p |
| NCBP2 | hsa-miR-2284aa  |
| NCBP2 | hsa-miR-518a-5p |
| NCBP2 | hsa-miR-466i-3p |
| NCBP2 | hsa-miR-767     |
| NCBP2 | hsa-miR-702-3p  |
| NCBP2 | hsa-miR-6509-5p |
| NCBP2 | hsa-miR-5584-5p |
| NCBP2 | hsa-miR-6565-3p |
| NCBP2 | hsa-miR-7118-3p |
| NCBP2 | hsa-miR-507     |
| NCBP2 | hsa-miR-5009-5p |
| NCBP2 | hsa-miR-6071    |
| NCBP2 | hsa-miR-6582-3p |
| NCBP2 | hsa-miR-4519    |
| NCBP2 | hsa-miR-576-5p  |
| NCBP2 | hsa-miR-335-3p  |
| NCBP2 | hsa-miR-133ab   |
| NCBP2 | hsa-miR-377-3p  |
| NCBP2 | hsa-miR-670-3p  |
| NCBP2 | hsa-miR-1976    |
| NCBP2 | hsa-miR-410-3p  |
| NCBP2 | hsa-miR-1721    |
| NCBP2 | hsa-miR-1972    |
| NCBP2 | hsa-miR-4678    |
| NCBP2 | hsa-miR-7086-3p |
| NCBP2 | hsa-miR-6876-3p |
| NCBP2 | hsa-miR-2285    |

|       |                   |
|-------|-------------------|
| NCBP2 | hsa-miR-215-5p    |
| NCBP2 | hsa-miR-6895-3p   |
| NCBP2 | hsa-miR-139-5p    |
| NCBP2 | hsa-miR-769-3p    |
| NCBP2 | hsa-miR-4677-5p   |
| NCBP2 | hsa-miR-677-3p    |
| NCBP2 | hsa-miR-369-3p    |
| NCBP2 | hsa-miR-22-5p     |
| NCBP2 | hsa-miR-3944-5p   |
| NCBP2 | hsa-miR-1191b-5p  |
| NCBP2 | hsa-miR-7208-3p   |
| NCBP2 | hsa-miR-140-5p    |
| NCBP2 | hsa-miR-455-3p    |
| NCBP2 | hsa-miR-4797-3p   |
| NCBP2 | hsa-miR-6826-3p   |
| NCBP2 | hsa-miR-2469      |
| NCBP2 | hsa-miR-8087      |
| NCBP2 | hsa-miR-134-5p    |
| NCBP2 | hsa-miR-6802-5p   |
| NCBP2 | hsa-miR-4320      |
| NCBP2 | hsa-miR-3182      |
| NCBP2 | hsa-miR-664       |
| NCBP2 | hsa-miR-493-5p    |
| NCBP2 | hsa-miR-323       |
| NCBP2 | hsa-miR-3661      |
| NCBP2 | hsa-miR-141-3p    |
| NCBP2 | hsa-miR-24-3p     |
| NCBP2 | hsa-miR-6878-3p   |
| NCBP2 | hsa-miR-3065-3p   |
| NCBP2 | hsa-miR-138-5p    |
| NCBP2 | hsa-miR-5193      |
| NCBP2 | hsa-miR-7184-3p   |
| NCBP2 | hsa-miR-6719-3p   |
| NCBP2 | hsa-miR-679       |
| NCBP2 | hsa-miR-6515-3p   |
| NCBP2 | hsa-miR-4778-5p   |
| NCBP2 | hsa-miR-3611      |
| NCBP2 | hsa-miR-548c-3p   |
| NCBP2 | hsa-miR-7090-3p   |
| NCBP2 | hsa-miR-888-5p    |
| NCBP2 | hsa-miR-6764-5p   |
| NCBP2 | hsa-miR-218a-1-3p |
| NCBP2 | hsa-miR-593-3p    |
| NCBP2 | hsa-miR-7678-3p   |
| NCBP2 | hsa-miR-5579-3p   |
| NCBP2 | hsa-miR-548x-3p   |

|       |                   |
|-------|-------------------|
| NCBP2 | hsa-miR-7013-5p   |
| NCBP2 | hsa-miR-302-5p    |
| NCBP2 | hsa-miR-187-3p    |
| NCBP2 | hsa-miR-548aj-3p  |
| NCBP2 | hsa-miR-5124a     |
| NCBP2 | hsa-miR-221-3p    |
| NCBP2 | hsa-miR-34b-5p    |
| NCBP2 | hsa-miR-2337      |
| NCBP2 | hsa-miR-6947-5p   |
| NCBP2 | hsa-miR-7254-5p   |
| NCBP2 | hsa-miR-202-5p    |
| NCBP2 | hsa-miR-466c-5p   |
| NCBP2 | hsa-miR-3547      |
| NCBP2 | hsa-miR-512-3p    |
| NCBP2 | hsa-miR-8908e     |
| NCBP2 | hsa-let-7c-1-3p   |
| NCBP2 | hsa-miR-4659a-3p  |
| NCBP2 | hsa-miR-3935      |
| NCBP2 | hsa-miR-7075-3p   |
| NCBP2 | hsa-miR-33-3p     |
| NCBP2 | hsa-miR-6977-3p   |
| NCBP2 | hsa-miR-4786-5p   |
| NCBP2 | hsa-miR-880-3p    |
| NCBP2 | hsa-miR-1775-3p   |
| NCBP2 | hsa-miR-5589-3p   |
| NCBP2 | hsa-miR-376a-2-5p |
| NCBP2 | hsa-miR-573       |
| NCBP2 | hsa-miR-4328      |
| NCBP2 | hsa-miR-582-3p    |
| NCBP2 | hsa-miR-340-5p    |
| NCBP2 | hsa-miR-422       |
| NCBP2 | hsa-miR-367-3p    |
| NCBP2 | hsa-miR-2365      |
| NCBP2 | hsa-miR-543-3p    |
| NCBP2 | hsa-miR-7227-5p   |
| NCBP2 | hsa-miR-742-3p    |
| NCBP2 | hsa-miR-3595      |
| NCBP2 | hsa-miR-34        |
| NCBP2 | hsa-miR-668       |
| NCBP2 | hsa-miR-421       |
| NCBP2 | hsa-miR-7163-5p   |
| NCBP2 | hsa-miR-6768-3p   |
| NCBP2 | hsa-miR-132-3p    |
| NCBP2 | hsa-miR-6950-3p   |
| NCBP2 | hsa-miR-181b-2-3p |
| NCBP2 | hsa-miR-500-3p    |

|       |                 |
|-------|-----------------|
| NCBP2 | hsa-miR-373-3p  |
| NCBP2 | hsa-miR-193-5p  |
| NCBP2 | hsa-miR-4326    |
| NCBP2 | hsa-miR-1188-3p |
| NCBP2 | hsa-miR-7261-5p |
| NCBP2 | hsa-miR-500     |
| NCBP2 | hsa-miR-29-5p   |
| NCBP2 | hsa-miR-6874-3p |
| NCBP2 | hsa-miR-674-5p  |
| NCBP2 | hsa-miR-2284ab  |
| NCBP2 | hsa-miR-4482-5p |
| NCBP2 | hsa-miR-499-5p  |
| NCBP2 | hsa-miR-2284k   |
| NCBP2 | hsa-miR-549a    |
| NCBP2 | hsa-miR-625-5p  |
| NCBP2 | hsa-miR-6896-3p |
| NCBP2 | hsa-miR-703     |
| NCBP2 | hsa-miR-468-5p  |
| NCBP2 | hsa-miR-1205    |
| NCBP2 | hsa-miR-6120-5p |
| NCBP2 | hsa-miR-105-5p  |
| NCBP2 | hsa-miR-1251-3p |
| NCBP2 | hsa-miR-1252    |
| NCBP2 | hsa-miR-5113    |
| NCBP2 | hsa-miR-584-5p  |
| NCBP2 | hsa-miR-377-3p  |
| NCBP2 | hsa-miR-653-3p  |
| NCBP2 | hsa-miR-3129-5p |
| NCBP2 | hsa-miR-548j-3p |
| NCBP2 | hsa-miR-7187-3p |
| NCBP2 | hsa-miR-568     |
| NCBP2 | hsa-miR-212-3p  |
| NCBP2 | hsa-miR-299-5p  |
| NCBP2 | hsa-miR-3188    |
| NCBP2 | hsa-miR-4732-5p |
| NCBP2 | hsa-miR-186-5p  |
| NCBP2 | hsa-miR-373-5p  |
| NCBP2 | hsa-miR-700-5p  |
| NCBP2 | hsa-miR-3529-3p |
| NCBP2 | hsa-miR-7208-5p |
| NCBP2 | hsa-miR-208-5p  |
| NCBP2 | hsa-miR-7091-3p |
| NCBP2 | hsa-miR-3192-3p |
| NCBP2 | hsa-miR-4474-5p |
| NCBP2 | hsa-miR-1912-3p |
| NCBP2 | hsa-miR-676-3p  |

|       |                 |
|-------|-----------------|
| NCBP2 | hsa-miR-892b    |
| NCBP2 | hsa-miR-3106-3p |
| NCBP2 | hsa-miR-4476    |
| NCBP2 | hsa-miR-7037-5p |
| NCBP2 | hsa-miR-3145-3p |
| NCBP2 | hsa-miR-6892-3p |
| NCBP2 | hsa-miR-6513-5p |
| NCBP2 | hsa-miR-3667-3p |
| NCBP2 | hsa-miR-4272    |
| NCBP2 | hsa-miR-192-5p  |
| NCBP2 | hsa-miR-7650-3p |
| NCBP2 | hsa-miR-28-3p   |
| NCBP2 | hsa-miR-6730-3p |
| NCBP2 | hsa-miR-4267    |
| NCBP2 | hsa-miR-598-5p  |
| NCBP2 | hsa-miR-133a-5p |
| NCBP2 | hsa-miR-211-5p  |
| NCBP2 | hsa-miR-134     |
| NCBP2 | hsa-miR-5135    |
| NCBP2 | hsa-miR-593-3p  |
| NCBP2 | hsa-miR-135     |
| NCBP2 | hsa-miR-7062-3p |
| NCBP2 | hsa-miR-4432    |
| NCBP2 | hsa-miR-6731-5p |
| NCBP2 | hsa-miR-524-5p  |
| NCBP2 | hsa-miR-5692a   |
| NCBP2 | hsa-miR-7090-5p |
| NCBP2 | hsa-miR-532-5p  |
| NCBP2 | hsa-miR-6875-3p |
| NCBP2 | hsa-miR-5010-3p |
| NCBP2 | hsa-miR-544-5p  |
| NCBP2 | hsa-miR-3176    |
| NCBP2 | hsa-miR-200-3p  |
| NCBP2 | hsa-miR-143-5p  |
| NCBP2 | hsa-miR-181-3p  |
| NCBP2 | hsa-miR-548s    |
| NCBP2 | hsa-miR-186-3p  |
| NCBP2 | hsa-miR-5680    |
| NCBP2 | hsa-miR-554     |
| NCBP2 | hsa-miR-2301    |
| NCBP2 | hsa-miR-467b-5p |
| NCBP2 | hsa-miR-452-5p  |
| NCBP2 | hsa-miR-518g-3p |
| NCBP2 | hsa-miR-188-3p  |
| NCBP2 | hsa-miR-584-5p  |
| NCBP2 | hsa-miR-4690-3p |



|       |                  |
|-------|------------------|
| NCBP2 | hsa-miR-1237-3p  |
| NCBP2 | hsa-miR-6324     |
| NCBP2 | hsa-miR-324-5p   |
| NCBP2 | hsa-miR-3473be   |
| NCBP2 | hsa-miR-6902-5p  |
| NCBP2 | hsa-miR-100-3p   |
| NCBP2 | hsa-miR-2303     |
| NCBP2 | hsa-miR-151-3p   |
| NCBP2 | hsa-miR-607      |
| NCBP2 | hsa-miR-374-5p   |
| NCBP2 | hsa-miR-146a-3p  |
| NCBP2 | hsa-miR-4652-3p  |
| NCBP2 | hsa-miR-26b-3p   |
| NCBP2 | hsa-miR-3066-3p  |
| NCBP2 | hsa-miR-7161-5p  |
| NCBP2 | hsa-miR-6528     |
| NCBP2 | hsa-miR-7847-3p  |
| NCBP2 | hsa-miR-337-3p   |
| NCBP2 | hsa-miR-543      |
| NCBP2 | hsa-miR-8866     |
| NCBP2 | hsa-miR-7578     |
| NCBP2 | hsa-miR-7680-5p  |
| NCBP2 | hsa-miR-6856-5p  |
| NCBP2 | hsa-miR-1616     |
| NCBP2 | hsa-miR-7088-3p  |
| NCBP2 | hsa-miR-4733-5p  |
| NCBP2 | hsa-miR-548aq-3p |
| NCBP2 | hsa-miR-2344     |
| NCBP2 | hsa-miR-1298-5p  |
| NCBP2 | hsa-miR-2284v    |
| NCBP2 | hsa-miR-450b-5p  |
| NCBP2 | hsa-miR-195-3p   |
| NCBP2 | hsa-miR-2397-3p  |
| NCBP2 | hsa-miR-7064-5p  |
| NCBP2 | hsa-miR-888-3p   |
| NCBP2 | hsa-miR-489-3p   |
| NCBP2 | hsa-miR-938      |
| NCBP2 | hsa-miR-5694     |
| NCBP2 | hsa-let-7        |
| NCBP2 | hsa-miR-200b-3p  |
| NCBP2 | hsa-miR-499b-5p  |
| NCBP2 | hsa-miR-891-3p   |
| NCBP2 | hsa-miR-556-5p   |
| NCBP2 | hsa-miR-1953     |
| NCBP2 | hsa-miR-6718-5p  |
| NCBP2 | hsa-miR-1814     |

|       |                   |
|-------|-------------------|
| NCBP2 | hsa-miR-203-3p.1  |
| NCBP2 | hsa-miR-2332      |
| NCBP2 | hsa-miR-223-3p    |
| NCBP2 | hsa-miR-486-5p    |
| NCBP2 | hsa-miR-142-3p    |
| NCBP2 | hsa-miR-1956      |
| NCBP2 | hsa-miR-802-5p    |
| NCBP2 | hsa-miR-343       |
| NCBP2 | hsa-miR-1283a     |
| NCBP2 | hsa-miR-548d-3p   |
| NCBP2 | hsa-miR-6997-5p   |
| NCBP2 | hsa-miR-653       |
| NCBP2 | hsa-miR-181b-1-3p |
| NCBP2 | hsa-miR-4504      |
| NCBP2 | hsa-miR-34a-3p    |
| NCBP2 | hsa-miR-331-5p    |
| NCBP2 | hsa-miR-883ab-3p  |
| NCBP2 | hsa-miR-7113-3p   |
| NCBP2 | hsa-miR-138-5p    |
| NCBP2 | hsa-miR-349       |
| NCBP2 | hsa-miR-7031-5p   |
| NCBP2 | hsa-miR-4650      |
| NCBP2 | hsa-miR-6322      |
| NCBP2 | hsa-miR-449a      |
| NCBP2 | hsa-miR-152-5p    |
| NCBP2 | hsa-miR-7666-5p   |
| NCBP2 | hsa-miR-3473c     |
| NCBP2 | hsa-miR-2421      |
| NCBP2 | hsa-miR-7323-3p   |
| NCBP2 | hsa-miR-1266-3p   |
| NCBP2 | hsa-miR-371a-5p   |
| NCBP2 | hsa-miR-570-3p    |
| NCBP2 | hsa-miR-6828-5p   |
| NCBP2 | hsa-miR-6976-3p   |
| NCBP2 | hsa-miR-7002-5p   |
| NCBP2 | hsa-miR-3130-5p   |
| NCBP2 | hsa-miR-2286      |
| NCBP2 | hsa-miR-3078-5p   |
| NCBP2 | hsa-miR-200a-3p   |
| NCBP2 | hsa-miR-8806      |
| NCBP2 | hsa-miR-216b-3p   |
| NCBP2 | hsa-miR-7106-3p   |
| NCBP2 | hsa-miR-8074      |
| NCBP2 | hsa-miR-3620-3p   |
| NCBP2 | hsa-miR-3568      |
| NCBP2 | hsa-miR-2466-3p   |

|       |                  |
|-------|------------------|
| NCBP2 | hsa-miR-211-5p   |
| NCBP2 | hsa-miR-3583-3p  |
| NCBP2 | hsa-miR-6847-5p  |
| NCBP2 | hsa-miR-199-3p   |
| NCBP2 | hsa-miR-4762-5p  |
| NCBP2 | hsa-miR-873-3p   |
| NCBP2 | hsa-miR-139-5p   |
| NCBP2 | hsa-miR-4722-5p  |
| NCBP2 | hsa-miR-339-5p   |
| NCBP2 | hsa-miR-1224     |
| NCBP2 | hsa-miR-6356     |
| NCBP2 | hsa-miR-3147     |
| NCBP2 | hsa-miR-7234-5p  |
| NCBP2 | hsa-miR-6872-3p  |
| NCBP2 | hsa-miR-8853     |
| NCBP2 | hsa-miR-2429     |
| NCBP2 | hsa-miR-5004-3p  |
| NCBP2 | hsa-miR-429-3p   |
| NCBP2 | hsa-miR-3662     |
| NCBP2 | hsa-miR-668-3p   |
| NCBP2 | hsa-miR-9-5p     |
| NCBP2 | hsa-miR-337-5p   |
| NCBP2 | hsa-miR-548ap-3p |
| NCBP2 | hsa-miR-944      |
| NCBP2 | hsa-miR-202-3p   |
| NCBP2 | hsa-miR-7154-5p  |
| NCBP2 | hsa-miR-19b-5p   |
| NCBP2 | hsa-miR-1739     |
| NCBP2 | hsa-miR-892-5p   |
| NCBP2 | hsa-miR-501-5p   |
| NCBP2 | hsa-miR-2452     |
| NCBP2 | hsa-miR-6768-5p  |
| NCBP2 | hsa-miR-936      |
| NCBP2 | hsa-miR-7664-5p  |
| NCBP2 | hsa-miR-1544-3p  |
| NCBP2 | hsa-miR-4729     |
| NCBP2 | hsa-miR-549-5p   |
| NCBP2 | hsa-miR-5195-5p  |
| NCBP2 | hsa-miR-1254     |
| NCBP2 | hsa-miR-2276-5p  |
| NCBP2 | hsa-miR-2325     |
| NCBP2 | hsa-miR-687      |
| NCBP2 | hsa-miR-4799-5p  |
| NCBP2 | hsa-miR-8839     |
| NCBP2 | hsa-miR-330-3p   |
| NCBP2 | hsa-miR-570-3p   |

|       |                  |
|-------|------------------|
| NCBP2 | hsa-miR-6516     |
| NCBP2 | hsa-miR-98-5p    |
| NCBP2 | hsa-miR-4717-3p  |
| NCBP2 | hsa-miR-6840-3p  |
| NCBP2 | hsa-miR-4437     |
| NCBP2 | hsa-miR-323-3p   |
| NCBP2 | hsa-miR-4679     |
| NCBP2 | hsa-miR-548as-3p |
| NCBP2 | hsa-miR-7033-5p  |
| NCBP2 | hsa-miR-3587     |
| NCBP2 | hsa-miR-6502-3p  |
| NCBP2 | hsa-miR-1286     |
| NCBP2 | hsa-miR-7198-3p  |
| NCBP2 | hsa-miR-7340-5p  |
| NCBP2 | hsa-miR-6215     |
| NCBP2 | hsa-miR-496-3p   |
| NCBP2 | hsa-miR-1240     |
| NCBP2 | hsa-miR-626      |
| NCBP2 | hsa-miR-144-3p   |
| NCBP2 | hsa-miR-1463     |
| NCBP2 | hsa-miR-3674     |
| NCBP2 | hsa-miR-8118     |
| NCBP2 | hsa-miR-2293     |
| NCBP2 | hsa-miR-3092-5p  |
| NCBP2 | hsa-miR-7201-3p  |
| NCBP2 | hsa-miR-694      |
| NCBP2 | hsa-miR-7649-3p  |
| NCBP2 | hsa-miR-3590-5p  |
| NCBP2 | hsa-miR-130a-5p  |
| NCBP2 | hsa-miR-371b-5p  |
| NCBP2 | hsa-miR-330-3p.2 |
| NCBP2 | hsa-miR-7214-3p  |
| NCBP2 | hsa-miR-7172-5p  |
| NCBP2 | hsa-miR-4282     |
| NCBP2 | hsa-miR-6408     |
| NCBP2 | hsa-miR-1981-5p  |
| NCBP2 | hsa-miR-6750-3p  |
| NCBP2 | hsa-miR-6079     |
| NCBP2 | hsa-miR-4287     |
| NCBP2 | hsa-miR-1285-5p  |
| NCBP2 | hsa-miR-5683     |
| NCBP2 | hsa-miR-873-5p.1 |
| NCBP2 | hsa-miR-7292-3p  |
| NCBP2 | hsa-miR-450b-3p  |
| NCBP2 | hsa-miR-153-5p   |
| NCBP2 | hsa-miR-4273     |

|       |                  |
|-------|------------------|
| NCBP2 | hsa-miR-7653-3p  |
| NCBP2 | hsa-miR-5089-5p  |
| NCBP2 | hsa-miR-142      |
| NCBP2 | hsa-miR-219-3p   |
| NCBP2 | hsa-miR-889-5p   |
| NCBP2 | hsa-miR-7232-5p  |
| NCBP2 | hsa-miR-1200     |
| NCBP2 | hsa-miR-761      |
| NCBP2 | hsa-miR-2284j    |
| NCBP2 | hsa-miR-3140-3p  |
| NCBP2 | hsa-miR-3922-3p  |
| NCBP2 | hsa-miR-218-5p   |
| NCBP2 | hsa-miR-6368     |
| NCBP2 | hsa-miR-579      |
| NCBP2 | hsa-miR-532-3p   |
| NCBP2 | hsa-miR-23a-5p   |
| NCBP2 | hsa-miR-216c-3p  |
| NCBP2 | hsa-miR-6975-3p  |
| NCBP2 | hsa-miR-466n-3p  |
| NCBP2 | hsa-miR-7193-3p  |
| NCBP2 | hsa-miR-6973b-3p |
| NCBP2 | hsa-miR-3116     |
| NCBP2 | hsa-miR-322-3p   |
| NCBP2 | hsa-miR-21-5p    |
| NCBP2 | hsa-miR-329-3p   |
| NCBP2 | hsa-miR-7060-3p  |
| NCBP2 | hsa-miR-203      |
| NCBP2 | hsa-miR-6346     |
| NCBP2 | hsa-miR-3148     |
| NCBP2 | hsa-miR-3713     |
| NCBP2 | hsa-miR-3942-3p  |
| NCBP2 | hsa-miR-6979-3p  |
| NCBP2 | hsa-miR-6749-3p  |
| NCBP2 | hsa-miR-3910     |
| NCBP2 | hsa-miR-600      |
| NCBP2 | hsa-miR-4526     |
| NCBP2 | hsa-miR-5586-5p  |
| NCBP2 | hsa-miR-7671-5p  |
| NCBP2 | hsa-miR-3590-3p  |
| NCBP2 | hsa-miR-6888-3p  |
| NCBP2 | hsa-miR-1283     |
| NCBP2 | hsa-miR-1304-3p  |
| NCBP2 | hsa-miR-466      |
| NCBP2 | hsa-miR-6126     |
| NCBP2 | hsa-miR-3086-5p  |
| NCBP2 | hsa-miR-767-5p   |

|       |                  |
|-------|------------------|
| NCBP2 | hsa-miR-6739-3p  |
| NCBP2 | hsa-miR-763      |
| NCBP2 | hsa-miR-345-3p   |
| NCBP2 | hsa-miR-1281     |
| NCBP2 | hsa-miR-2116-5p  |
| NCBP2 | hsa-miR-505-3p.2 |
| NCBP2 | hsa-miR-4757-5p  |
| NCBP2 | hsa-miR-7224-5p  |
| NCBP2 | hsa-miR-193-3p   |
| NCBP2 | hsa-miR-204-5p   |
| NCBP2 | hsa-miR-32-3p    |
| NCBP2 | hsa-miR-129-5p   |
| NCBP2 | hsa-miR-483-5p   |
| NCBP2 | hsa-miR-206-3p   |
| NCBP2 | hsa-miR-429-5p   |
| NCBP2 | hsa-miR-4257     |
| NCBP2 | hsa-miR-7188-5p  |
| NCBP2 | hsa-miR-378a-5p  |
| NCBP2 | hsa-miR-323a-3p  |
| NCBP2 | hsa-miR-2380     |
| NCBP2 | hsa-miR-145-5p   |
| NCBP2 | hsa-miR-764-3p   |
| NCBP2 | hsa-miR-1245-3p  |
| NCBP2 | hsa-miR-493-3p   |
| NCBP2 | hsa-miR-1252-3p  |
| NCBP2 | hsa-miR-489      |
| NCBP2 | hsa-miR-466g     |
| NCBP2 | hsa-miR-6073     |
| NCBP2 | hsa-miR-5101     |
| NCBP2 | hsa-miR-585-5p   |
| NCBP2 | hsa-miR-382-5p   |
| NCBP2 | hsa-miR-346      |
| NCBP2 | hsa-miR-499      |
| NCBP2 | hsa-miR-3978     |
| NCBP2 | hsa-miR-511      |
| NCBP2 | hsa-miR-1224-3p  |
| NCBP2 | hsa-miR-6373     |
| NCBP2 | hsa-miR-7371f-5p |
| NCBP2 | hsa-miR-6807-5p  |
| NCBP2 | hsa-miR-669d-5p  |
| NCBP2 | hsa-miR-7089-3p  |
| NCBP2 | hsa-miR-7016-3p  |
| NCBP2 | hsa-miR-1303     |
| NCBP2 | hsa-miR-2338     |
| NCBP2 | hsa-miR-23-3p    |
| NCBP2 | hsa-miR-548u     |

|       |                   |
|-------|-------------------|
| NCBP2 | hsa-miR-4744      |
| NCBP2 | hsa-miR-2384      |
| NCBP2 | hsa-miR-27b-5p    |
| NCBP2 | hsa-miR-6887-3p   |
| NCBP2 | hsa-miR-605       |
| NCBP2 | hsa-miR-214-3p    |
| NCBP2 | hsa-miR-548t-5p   |
| NCBP2 | hsa-miR-623       |
| NCBP2 | hsa-miR-7201-5p   |
| NCBP2 | hsa-miR-874-5p    |
| NCBP2 | hsa-miR-3668      |
| NCBP2 | hsa-miR-4425      |
| NCBP2 | hsa-miR-142-3p.1  |
| NCBP2 | hsa-miR-500a-3p   |
| NCBP2 | hsa-miR-101-1-5p  |
| NCBP2 | hsa-miR-27        |
| NCBP2 | hsa-miR-431-5p    |
| NCBP2 | hsa-miR-3164      |
| NCBP2 | hsa-miR-221-5p    |
| NCBP2 | hsa-miR-4775      |
| NCBP2 | hsa-miR-512       |
| NCBP2 | hsa-miR-2285b     |
| NCBP2 | hsa-miR-7235-3p   |
| NCBP2 | hsa-miR-466c-3p   |
| NCBP2 | hsa-miR-8846      |
| NCBP2 | hsa-miR-365-5p    |
| NCBP2 | hsa-miR-181-5p    |
| NCBP2 | hsa-miR-3922-5p   |
| NCBP2 | hsa-miR-660-3p    |
| NCBP2 | hsa-miR-632       |
| NCBP2 | hsa-miR-6778-3p   |
| NCBP2 | hsa-miR-3646      |
| NCBP2 | hsa-miR-3100-5p   |
| NCBP2 | hsa-miR-3913-3p   |
| NCBP2 | hsa-miR-129b-5p   |
| NCBP2 | hsa-miR-4672      |
| NCBP2 | hsa-miR-6832-5p   |
| NCBP2 | hsa-miR-101b-3p.1 |
| NCBP2 | hsa-miR-548cej-3p |
| NCBP2 | hsa-miR-124-5p    |
| NCBP2 | hsa-miR-367-5p    |
| NCBP2 | hsa-miR-642b-5p   |
| NCBP2 | hsa-miR-7386o-3p  |
| NCBP2 | hsa-miR-7287-5p   |
| NCBP2 | hsa-miR-4685-3p   |
| NCBP2 | hsa-miR-1224-5p   |

|       |                  |
|-------|------------------|
| NCBP2 | hsa-miR-7063-3p  |
| NCBP2 | hsa-miR-181      |
| NCBP2 | hsa-miR-384-5p   |
| NCBP2 | hsa-miR-32-5p    |
| NCBP2 | hsa-miR-2345     |
| NCBP2 | hsa-miR-1193     |
| NCBP2 | hsa-miR-122-5p   |
| NCBP2 | hsa-miR-208a-5p  |
| NCBP2 | hsa-miR-7230-3p  |
| NCBP2 | hsa-miR-6818-3p  |
| NCBP2 | hsa-miR-320a     |
| NCBP2 | hsa-miR-362-5p   |
| NCBP2 | hsa-miR-676-3p   |
| NCBP2 | hsa-miR-1306-5p  |
| NCBP2 | hsa-miR-4330     |
| NCBP2 | hsa-miR-150-5p   |
| NCBP2 | hsa-miR-129b-3p  |
| NCBP2 | hsa-miR-330-5p   |
| NCBP2 | hsa-miR-520g-3p  |
| NCBP2 | hsa-miR-8060     |
| NCBP2 | hsa-miR-3085-5p  |
| NCBP2 | hsa-miR-1915-3p  |
| NCBP2 | hsa-miR-3942-5p  |
| NCBP2 | hsa-miR-6734-3p  |
| NCBP2 | hsa-miR-215      |
| NCBP2 | hsa-miR-548aa    |
| NCBP2 | hsa-miR-4674     |
| NCBP2 | hsa-miR-7207-5p  |
| NCBP2 | hsa-miR-4423-5p  |
| NCBP2 | hsa-miR-3928-3p  |
| NCBP2 | hsa-miR-548t-3p  |
| NCBP2 | hsa-miR-3473g    |
| NCBP2 | hsa-miR-669hk-3p |
| NCBP2 | hsa-miR-4659b-3p |
| NCBP2 | hsa-miR-4771     |
| NCBP2 | hsa-miR-2387     |
| NCBP2 | hsa-miR-1839-3p  |
| NCBP2 | hsa-miR-6959-5p  |
| NCBP2 | hsa-miR-338-3p   |
| NCBP2 | hsa-miR-181b-3p  |
| NCBP2 | hsa-miR-6953-3p  |
| NCBP2 | hsa-miR-2310     |
| NCBP2 | hsa-miR-362-3p   |
| NCBP2 | hsa-miR-549a     |
| NCBP2 | hsa-miR-769-5p   |
| NCBP2 | hsa-miR-5132-3p  |



|       |                  |
|-------|------------------|
| NCBP2 | hsa-miR-3200-5p  |
| NCBP2 | hsa-miR-7007-5p  |
| NCBP2 | hsa-miR-3075-3p  |
| NCBP2 | hsa-miR-2368-3p  |
| NCBP2 | hsa-miR-7442-5p  |
| NCBP2 | hsa-miR-379-5p   |
| NCBP2 | hsa-miR-583      |
| NCBP2 | hsa-miR-374b-5p  |
| NCBP2 | hsa-miR-193a-5p  |
| NCBP2 | hsa-miR-2284z    |
| NCBP2 | hsa-miR-7472-3p  |
| NCBP2 | hsa-miR-3914     |
| NCBP2 | hsa-miR-501-3p   |
| NCBP2 | hsa-miR-548az-5p |
| NCBP2 | hsa-miR-380      |
| NCBP2 | hsa-miR-4528     |
| NCBP2 | hsa-miR-548n     |
| NCBP2 | hsa-miR-10b-3p   |
| NCBP2 | hsa-miR-122      |
| NCBP2 | hsa-miR-1264-3p  |
| NCBP2 | hsa-miR-6755-3p  |
| NSUN2 | hsa-miR-7031-5p  |
| NSUN2 | hsa-miR-7333-5p  |
| NSUN2 | hsa-miR-1929-5p  |
| NSUN2 | hsa-miR-578      |
| NSUN2 | hsa-miR-148-5p   |
| NSUN2 | hsa-miR-129-5p   |
| NSUN2 | hsa-miR-500a-3p  |
| NSUN2 | hsa-miR-506-3p   |
| NSUN2 | hsa-miR-548e-5p  |
| NSUN2 | hsa-miR-5582-5p  |
| NSUN2 | hsa-miR-2284y    |
| NSUN2 | hsa-miR-548p     |
| NSUN2 | hsa-miR-143-3p   |
| NSUN2 | hsa-miR-3938-3p  |
| NSUN2 | hsa-miR-5618-5p  |
| NSUN2 | hsa-miR-6736-3p  |
| NSUN2 | hsa-miR-7398j-3p |
| NSUN2 | hsa-miR-7340-3p  |
| NSUN2 | hsa-miR-208-3p   |
| NSUN2 | hsa-miR-7221-3p  |
| NSUN2 | hsa-miR-3470b    |
| NSUN2 | hsa-miR-875-3p   |
| NSUN2 | hsa-miR-1277-5p  |
| NSUN2 | hsa-miR-665      |
| NSUN2 | hsa-miR-495-3p   |

|       |                  |
|-------|------------------|
| NSUN2 | hsa-miR-492      |
| NSUN2 | hsa-miR-329-3p   |
| NSUN2 | hsa-miR-29a-5p   |
| NSUN2 | hsa-miR-101-3p   |
| NSUN2 | hsa-miR-7243-5p  |
| NSUN2 | hsa-miR-7084-3p  |
| NSUN2 | hsa-miR-526b-5p  |
| NSUN2 | hsa-miR-95-5p    |
| NSUN2 | hsa-miR-7025-3p  |
| NSUN2 | hsa-miR-1972     |
| NSUN2 | hsa-miR-32-5p    |
| NSUN2 | hsa-miR-944      |
| NSUN2 | hsa-miR-572      |
| NSUN2 | hsa-miR-7355-3p  |
| NSUN2 | hsa-miR-5680     |
| NSUN2 | hsa-miR-132-3p   |
| NSUN2 | hsa-miR-5625-3p  |
| NSUN2 | hsa-miR-4455     |
| NSUN2 | hsa-miR-5119     |
| NSUN2 | hsa-miR-5194     |
| NSUN2 | hsa-miR-3096-5p  |
| NSUN2 | hsa-miR-665-3p   |
| NSUN2 | hsa-miR-2399-5p  |
| NSUN2 | hsa-miR-199      |
| NSUN2 | hsa-miR-6505-3p  |
| NSUN2 | hsa-miR-5002-5p  |
| NSUN2 | hsa-miR-362-3p   |
| NSUN2 | hsa-miR-7151-3p  |
| NSUN2 | hsa-miR-7399-5p  |
| NSUN2 | hsa-miR-6320     |
| NSUN2 | hsa-miR-200bc-3p |
| NSUN2 | hsa-miR-548a1    |
| NSUN2 | hsa-miR-466-5p   |
| NSUN2 | hsa-miR-4482-3p  |
| NSUN2 | hsa-miR-3660     |
| NSUN2 | hsa-miR-7158-5p  |
| NSUN2 | hsa-miR-3963     |
| NSUN2 | hsa-miR-548      |
| NSUN2 | hsa-miR-17-3p    |
| NSUN2 | hsa-miR-216b-3p  |
| NSUN2 | hsa-miR-1193-3p  |
| NSUN2 | hsa-miR-513      |
| NSUN2 | hsa-miR-544-3p   |
| NSUN2 | hsa-miR-769-5p   |
| NSUN2 | hsa-miR-5697-3p  |
| NSUN2 | hsa-miR-99-3p    |

|       |                  |
|-------|------------------|
| NSUN2 | hsa-miR-7011-3p  |
| NSUN2 | hsa-miR-607      |
| NSUN2 | hsa-miR-878-3p   |
| NSUN2 | hsa-miR-9769-5p  |
| NSUN2 | hsa-miR-6972-3p  |
| NSUN2 | hsa-miR-7300-5p  |
| NSUN2 | hsa-miR-7270-5p  |
| NSUN2 | hsa-miR-142      |
| NSUN2 | hsa-miR-140-5p   |
| NSUN2 | hsa-miR-412      |
| NSUN2 | hsa-miR-4717-5p  |
| NSUN2 | hsa-miR-511-3p   |
| NSUN2 | hsa-miR-7274-5p  |
| NSUN2 | hsa-miR-6953-3p  |
| NSUN2 | hsa-miR-545-3p   |
| NSUN2 | hsa-miR-193a     |
| NSUN2 | hsa-miR-4453     |
| NSUN2 | hsa-miR-526      |
| NSUN2 | hsa-miR-6788-5p  |
| NSUN2 | hsa-miR-6738-3p  |
| NSUN2 | hsa-miR-15c-3p   |
| NSUN2 | hsa-miR-224-5p   |
| NSUN2 | hsa-miR-7047-3p  |
| NSUN2 | hsa-miR-199-3p   |
| NSUN2 | hsa-miR-19       |
| NSUN2 | hsa-miR-2415-3p  |
| NSUN2 | hsa-miR-7026-5p  |
| NSUN2 | hsa-miR-218-5p   |
| NSUN2 | hsa-miR-466n-3p  |
| NSUN2 | hsa-miR-6403     |
| NSUN2 | hsa-miR-4772-3p  |
| NSUN2 | hsa-miR-5622-5p  |
| NSUN2 | hsa-miR-6804-3p  |
| NSUN2 | hsa-miR-6379     |
| NSUN2 | hsa-miR-7262a-5p |
| NSUN2 | hsa-miR-6731-5p  |
| NSUN2 | hsa-miR-539-5p   |
| NSUN2 | hsa-miR-499      |
| NSUN2 | hsa-miR-9a-3p    |
| NSUN2 | hsa-miR-7230-5p  |
| NSUN2 | hsa-miR-350      |
| NSUN2 | hsa-miR-16-3p    |
| NSUN2 | hsa-miR-7398r-3p |
| NSUN2 | hsa-miR-4328     |
| NSUN2 | hsa-miR-136-5p   |
| NSUN2 | hsa-miR-548g-5p  |

|       |                  |
|-------|------------------|
| NSUN2 | hsa-miR-4438     |
| NSUN2 | hsa-miR-29b-2-5p |
| NSUN2 | hsa-miR-7327-5p  |
| NSUN2 | hsa-miR-1546-3p  |
| NSUN2 | hsa-miR-6981-3p  |
| NSUN2 | hsa-miR-4314     |
| NSUN2 | hsa-miR-2469     |
| NSUN2 | hsa-miR-5691     |
| NSUN2 | hsa-miR-6724-5p  |
| NSUN2 | hsa-miR-6366     |
| NSUN2 | hsa-miR-6838-3p  |
| NSUN2 | hsa-miR-296-5p   |
| NSUN2 | hsa-miR-382-5p   |
| NSUN2 | hsa-miR-4538     |
| NSUN2 | hsa-miR-2285x    |
| NSUN2 | hsa-miR-138-3p   |
| NSUN2 | hsa-miR-7379-5p  |
| NSUN2 | hsa-miR-380-3p   |
| NSUN2 | hsa-miR-21-5p    |
| NSUN2 | hsa-miR-3561-5p  |
| NSUN2 | hsa-miR-509-5p   |
| NSUN2 | hsa-miR-4296     |
| NSUN2 | hsa-miR-7383-5p  |
| NSUN2 | hsa-miR-2389     |
| NSUN2 | hsa-miR-133-5p   |
| NSUN2 | hsa-miR-2425-5p  |
| NSUN2 | hsa-miR-7181-5p  |
| NSUN2 | hsa-miR-340-5p   |
| NSUN2 | hsa-miR-2387     |
| NSUN2 | hsa-miR-330-3p   |
| NSUN2 | hsa-miR-4422     |
| NSUN2 | hsa-miR-101-1-5p |
| NSUN2 | hsa-miR-208a-3p  |
| NSUN2 | hsa-miR-326      |
| NSUN2 | hsa-miR-1260a    |
| NSUN2 | hsa-miR-450a-5p  |
| NSUN2 | hsa-miR-7386l-5p |
| NSUN2 | hsa-miR-26a-3p   |
| NSUN2 | hsa-miR-7854-3p  |
| NSUN2 | hsa-miR-374-5p   |
| NSUN2 | hsa-miR-3606-3p  |
| NSUN2 | hsa-miR-1584-3p  |
| NSUN2 | hsa-miR-2284b    |
| NSUN2 | hsa-miR-1838     |
| NSUN2 | hsa-miR-410      |
| NSUN2 | hsa-miR-299-3p   |

|       |                 |
|-------|-----------------|
| NSUN2 | hsa-miR-669m-5p |
| NSUN2 | hsa-miR-937-3p  |
| NSUN2 | hsa-miR-1260a   |
| NSUN2 | hsa-miR-221-5p  |
| NSUN2 | hsa-miR-3944-5p |
| NSUN2 | hsa-miR-7068-3p |
| NSUN2 | hsa-miR-683     |
| NSUN2 | hsa-miR-1184    |
| NSUN2 | hsa-miR-3613b   |
| NSUN2 | hsa-miR-27-3p   |
| NSUN2 | hsa-miR-642-3p  |
| NSUN2 | hsa-miR-25-3p   |
| NSUN2 | hsa-miR-200c-3p |
| NSUN2 | hsa-miR-2284u   |
| NSUN2 | hsa-miR-7339-5p |
| NSUN2 | hsa-miR-6418-3p |
| NSUN2 | hsa-miR-1983    |
| NSUN2 | hsa-miR-7-3p    |
| NSUN2 | hsa-miR-450-5p  |
| NSUN2 | hsa-miR-4649-3p |
| NSUN2 | hsa-miR-153-3p  |
| NSUN2 | hsa-miR-5192    |
| NSUN2 | hsa-miR-4316    |
| NSUN2 | hsa-miR-1188-5p |
| NSUN2 | hsa-miR-7051-5p |
| NSUN2 | hsa-miR-433-3p  |
| NSUN2 | hsa-miR-4632-5p |
| NSUN2 | hsa-miR-550b-3p |
| NSUN2 | hsa-miR-144-3p  |
| NSUN2 | hsa-miR-449-5p  |
| NSUN2 | hsa-miR-8062    |
| NSUN2 | hsa-miR-3187-3p |
| NSUN2 | hsa-miR-383-3p  |
| NSUN2 | hsa-miR-425     |
| NSUN2 | hsa-miR-5706    |
| NSUN2 | hsa-miR-3192    |
| NSUN2 | hsa-miR-4418    |
| NSUN2 | hsa-miR-6130    |
| NSUN2 | hsa-miR-7341-5p |
| NSUN2 | hsa-miR-519d-5p |
| NSUN2 | hsa-miR-2368-3p |
| NSUN2 | hsa-miR-367-3p  |
| NSUN2 | hsa-miR-143-5p  |
| NSUN2 | hsa-miR-2426    |
| NSUN2 | hsa-miR-1933-5p |
| NSUN2 | hsa-miR-3158-5p |

|       |                   |
|-------|-------------------|
| NSUN2 | hsa-miR-2284a     |
| NSUN2 | hsa-miR-376a-1-5p |
| NSUN2 | hsa-miR-2362      |
| NSUN2 | hsa-miR-3938      |
| NSUN2 | hsa-miR-2053      |
| NSUN2 | hsa-miR-140-3p.1  |
| NSUN2 | hsa-miR-203       |
| NSUN2 | hsa-miR-7018-3p   |
| NSUN2 | hsa-miR-149-5p    |
| NSUN2 | hsa-miR-7159-3p   |
| NSUN2 | hsa-miR-7185-3p   |
| NSUN2 | hsa-miR-137-3p    |
| NSUN2 | hsa-miR-19-3p     |
| NSUN2 | hsa-miR-548ao-3p  |
| NSUN2 | hsa-miR-3590-3p   |
| NSUN2 | hsa-miR-6735-5p   |
| NSUN2 | hsa-miR-34-5p     |
| NSUN2 | hsa-miR-6943-3p   |
| NSUN2 | hsa-miR-328-3p    |
| NSUN2 | hsa-miR-322-3p    |
| NSUN2 | hsa-miR-3065-5p   |
| NSUN2 | hsa-miR-30c-3p    |
| NSUN2 | hsa-miR-506-3p    |
| NSUN2 | hsa-miR-513a      |
| NSUN2 | hsa-miR-16-1-3p   |
| NSUN2 | hsa-miR-21-5p     |
| NSUN2 | hsa-miR-4322      |
| NSUN2 | hsa-miR-7277-3p   |
| NSUN2 | hsa-miR-4265      |
| NSUN2 | hsa-miR-2284g     |
| NSUN2 | hsa-miR-7646-3p   |
| NSUN2 | hsa-miR-6516-3p   |
| NSUN2 | hsa-miR-3667-5p   |
| NSUN2 | hsa-miR-2284z     |
| NSUN2 | hsa-miR-7023-3p   |
| NSUN2 | hsa-miR-8883      |
| NSUN2 | hsa-miR-3472      |
| NSUN2 | hsa-miR-369-3p    |
| NSUN2 | hsa-miR-6879-5p   |
| NSUN2 | hsa-miR-7977      |
| NSUN2 | hsa-miR-3185      |
| NSUN2 | hsa-miR-6996-5p   |
| NSUN2 | hsa-miR-6974-3p   |
| NSUN2 | hsa-miR-124-5p    |
| NSUN2 | hsa-miR-8085      |
| NSUN2 | hsa-miR-4782-5p   |

|       |                  |
|-------|------------------|
| NSUN2 | hsa-miR-6994-5p  |
| NSUN2 | hsa-miR-374a-3p  |
| NSUN2 | hsa-miR-622      |
| NSUN2 | hsa-miR-2284l    |
| NSUN2 | hsa-miR-575      |
| NSUN2 | hsa-miR-659-3p   |
| NSUN2 | hsa-miR-1545a-3p |
| NSUN2 | hsa-miR-7292-3p  |
| NSUN2 | hsa-miR-7398a-3p |
| NSUN2 | hsa-miR-1930-3p  |
| NSUN2 | hsa-miR-330-3p.2 |
| NSUN2 | hsa-miR-495-3p   |
| NSUN2 | hsa-miR-382-3p   |
| NSUN2 | hsa-miR-378j     |
| NSUN2 | hsa-miR-7286-3p  |
| NSUN2 | hsa-miR-26-3p    |
| NSUN2 | hsa-miR-7089-3p  |
| NSUN2 | hsa-miR-4417     |
| NSUN2 | hsa-miR-124      |
| NSUN2 | hsa-miR-6089     |
| NSUN2 | hsa-miR-514a-5p  |
| NSUN2 | hsa-miR-4714-5p  |
| NSUN2 | hsa-miR-891b     |
| NSUN2 | hsa-miR-2320-5p  |
| NSUN2 | hsa-miR-350-3p   |
| NSUN2 | hsa-miR-513c-3p  |
| NSUN2 | hsa-miR-548an    |
| NSUN2 | hsa-miR-7350-3p  |
| NSUN2 | hsa-miR-499b-5p  |
| NSUN2 | hsa-miR-215-3p   |
| NSUN2 | hsa-miR-6127     |
| NSUN2 | hsa-miR-302-5p   |
| NSUN2 | hsa-miR-423-5p   |
| NSUN2 | hsa-miR-1185-3p  |
| NSUN2 | hsa-miR-6955-3p  |
| NSUN2 | hsa-miR-19-5p    |
| NSUN2 | hsa-miR-676-3p   |
| NSUN2 | hsa-miR-878      |
| NSUN2 | hsa-miR-6839-5p  |
| NSUN2 | hsa-miR-200b-5p  |
| NSUN2 | hsa-miR-7647-3p  |
| NSUN2 | hsa-miR-3200-5p  |
| NSUN2 | hsa-miR-7351-5p  |
| NSUN2 | hsa-miR-7398l-3p |
| NSUN2 | hsa-miR-6878-5p  |
| NSUN2 | hsa-miR-4286     |

|       |                  |
|-------|------------------|
| NSUN2 | hsa-miR-590-5p   |
| NSUN2 | hsa-miR-194-5p   |
| NSUN2 | hsa-miR-6998-3p  |
| NSUN2 | hsa-miR-548j-5p  |
| NSUN2 | hsa-miR-455-3p.2 |
| NSUN2 | hsa-miR-4477a    |
| NSUN2 | hsa-miR-892-5p   |
| NSUN2 | hsa-miR-290b-5p  |
| NSUN2 | hsa-miR-1294     |
| NSUN2 | hsa-miR-7373a-3p |
| NSUN2 | hsa-miR-1301-3p  |
| NSUN2 | hsa-miR-2347     |
| NSUN2 | hsa-miR-4263     |
| NSUN2 | hsa-miR-590-3p   |
| NSUN2 | hsa-miR-548aj-5p |
| NSUN2 | hsa-miR-4274     |
| NSUN2 | hsa-miR-7222-3p  |
| NSUN2 | hsa-miR-1273g-3p |
| NSUN2 | hsa-miR-619-5p   |
| NSUN2 | hsa-miR-3965     |
| NSUN2 | hsa-miR-4660     |
| NSUN2 | hsa-miR-548c-3p  |
| NSUN2 | hsa-miR-545-3p   |
| NSUN2 | hsa-miR-6129     |
| NSUN2 | hsa-miR-494-3p   |
| NSUN2 | hsa-miR-576-5p   |
| NSUN2 | hsa-miR-6506-5p  |
| NSUN2 | hsa-miR-7370-5p  |
| NSUN2 | hsa-miR-204-3p   |
| NSUN2 | hsa-miR-323b-3p  |
| NSUN2 | hsa-miR-32-3p    |
| NSUN2 | hsa-miR-7004-3p  |
| NSUN2 | hsa-miR-7398q-3p |
| NSUN2 | hsa-miR-510-3p   |
| NSUN2 | hsa-miR-590-5p   |
| NSUN2 | hsa-miR-450a     |
| NSUN2 | hsa-miR-6762-3p  |
| NSUN2 | hsa-miR-375      |
| NSUN2 | hsa-miR-8872     |
| NSUN2 | hsa-miR-3580-3p  |
| NSUN2 | hsa-miR-151-3p   |
| NSUN2 | hsa-miR-487a     |
| NSUN2 | hsa-miR-4646-5p  |
| NSUN2 | hsa-miR-101-3p   |
| NSUN2 | hsa-miR-1324     |
| NSUN2 | hsa-miR-7318-5p  |



|       |                   |
|-------|-------------------|
| NSUN2 | hsa-miR-1952      |
| NSUN2 | hsa-miR-544a      |
| NSUN2 | hsa-miR-6365      |
| NSUN2 | hsa-miR-7386l-3p  |
| NSUN2 | hsa-miR-876-5p    |
| NSUN2 | hsa-miR-497-3p    |
| NSUN2 | hsa-miR-200a-3p   |
| NSUN2 | hsa-miR-6734-5p   |
| NSUN2 | hsa-miR-124-3p.1  |
| NSUN2 | hsa-miR-6348      |
| NSUN2 | hsa-miR-7370-3p   |
| NSUN2 | hsa-miR-202-5p    |
| NSUN2 | hsa-miR-3071-5p   |
| NSUN2 | hsa-miR-126-5p    |
| NSUN2 | hsa-miR-4804-3p   |
| NSUN2 | hsa-miR-7398b-3p  |
| NSUN2 | hsa-miR-4708-3p   |
| NSUN2 | hsa-miR-336-5p    |
| NSUN2 | hsa-miR-343       |
| NSUN2 | hsa-miR-376a-5p   |
| NSUN2 | hsa-miR-3587      |
| NSUN2 | hsa-miR-8797      |
| NSUN2 | hsa-miR-3664-5p   |
| NSUN2 | hsa-miR-219a-1-3p |
| NSUN2 | hsa-miR-140-5p    |
| NSUN2 | hsa-miR-548f-5p   |
| NSUN2 | hsa-miR-7386j-3p  |
| NSUN2 | hsa-miR-378       |
| NSUN2 | hsa-miR-548au-3p  |
| NSUN2 | hsa-miR-380       |
| NSUN2 | hsa-miR-7680-5p   |
| NSUN2 | hsa-miR-134-5p    |
| NSUN2 | hsa-miR-301-3p    |
| NSUN2 | hsa-miR-455-3p.1  |
| NSUN2 | hsa-miR-4436b-3p  |
| NSUN2 | hsa-miR-544a      |
| NSUN2 | hsa-miR-3130-3p   |
| NSUN2 | hsa-miR-2467-3p   |
| NSUN2 | hsa-miR-8807      |
| NSUN2 | hsa-miR-425-5p    |
| NSUN2 | hsa-miR-5095      |
| NSUN2 | hsa-miR-320a      |
| NSUN2 | hsa-miR-2323      |
| NSUN2 | hsa-miR-4445-3p   |
| NSUN2 | hsa-miR-603       |
| NSUN2 | hsa-miR-8850      |

|       |                  |
|-------|------------------|
| NSUN2 | hsa-miR-2284aa   |
| NSUN2 | hsa-miR-3926     |
| NSUN2 | hsa-miR-124-3p   |
| NSUN2 | hsa-miR-7073-3p  |
| NSUN2 | hsa-miR-7848-3p  |
| NSUN2 | hsa-miR-2411-5p  |
| NSUN2 | hsa-miR-498      |
| NSUN2 | hsa-miR-1260b    |
| NSUN2 | hsa-miR-7200-3p  |
| NSUN2 | hsa-miR-205-3p   |
| NSUN2 | hsa-miR-6120-5p  |
| NSUN2 | hsa-miR-452-3p   |
| NSUN2 | hsa-miR-7843-5p  |
| NSUN2 | hsa-miR-1239     |
| NSUN2 | hsa-miR-92-3p    |
| NSUN2 | hsa-miR-153-5p   |
| NSUN2 | hsa-miR-200-3p   |
| NSUN2 | hsa-miR-223-5p   |
| NSUN2 | hsa-miR-628-3p   |
| NSUN2 | hsa-miR-548s     |
| NSUN2 | hsa-miR-548c-3p  |
| NSUN2 | hsa-miR-1179     |
| NSUN2 | hsa-miR-5008-5p  |
| NSUN2 | hsa-miR-6363     |
| NSUN2 | hsa-miR-4666b    |
| NSUN2 | hsa-miR-548x-5p  |
| NSUN2 | hsa-miR-1547-3p  |
| NSUN2 | hsa-miR-7398i-3p |
| NSUN2 | hsa-miR-488-3p   |
| NSUN2 | hsa-miR-468-3p   |
| NSUN2 | hsa-miR-15a-3p   |
| NSUN2 | hsa-miR-588      |
| NSUN2 | hsa-miR-1894-3p  |
| NSUN2 | hsa-miR-569      |
| NSUN2 | hsa-miR-4661-3p  |
| NSUN2 | hsa-miR-3194-3p  |
| NSUN2 | hsa-miR-7056-3p  |
| NSUN2 | hsa-miR-3942-3p  |
| NSUN2 | hsa-miR-93-3p    |
| NSUN2 | hsa-miR-6747-5p  |
| NSUN2 | hsa-miR-5692a    |
| NSUN2 | hsa-miR-3088-3p  |
| NSUN2 | hsa-miR-6773-5p  |
| NSUN2 | hsa-miR-505-3p   |
| NSUN2 | hsa-miR-4704-5p  |
| NSUN2 | hsa-miR-5585-5p  |

|       |                   |
|-------|-------------------|
| NSUN2 | hsa-miR-142-5p    |
| NSUN2 | hsa-miR-21-3p     |
| NSUN2 | hsa-miR-2355-5p   |
| NSUN2 | hsa-miR-7398t-3p  |
| NSUN2 | hsa-miR-429       |
| NSUN2 | hsa-miR-4786-3p   |
| NSUN2 | hsa-miR-130-3p    |
| NSUN2 | hsa-miR-2363      |
| NSUN2 | hsa-miR-320a      |
| NSUN2 | hsa-miR-217       |
| NSUN2 | hsa-miR-7385f-3p  |
| NSUN2 | hsa-miR-1982-3p   |
| NSUN2 | hsa-miR-2276-3p   |
| NSUN2 | hsa-miR-5132-3p   |
| NSUN2 | hsa-miR-135-5p    |
| NSUN2 | hsa-miR-7398m-3p  |
| NSUN2 | hsa-miR-509-3-5p  |
| NSUN2 | hsa-miR-190-3p    |
| NSUN2 | hsa-miR-6731-3p   |
| NSUN2 | hsa-miR-6134      |
| NSUN2 | hsa-miR-9-3p      |
| NSUN2 | hsa-miR-8792      |
| NSUN2 | hsa-miR-1224-3p   |
| NSUN2 | hsa-miR-5190      |
| NSUN2 | hsa-miR-6782-5p   |
| NSUN2 | hsa-miR-6909-3p   |
| NSUN2 | hsa-miR-518c-5p   |
| NSUN2 | hsa-miR-7168-5p   |
| NSUN2 | hsa-miR-181a-2-3p |
| NSUN2 | hsa-miR-7374a-3p  |
| NSUN2 | hsa-miR-3079-5p   |
| NSUN2 | hsa-miR-7094-3p   |
| NSUN2 | hsa-miR-892b      |
| NSUN2 | hsa-miR-513a-3p   |
| NSUN2 | hsa-miR-138-5p    |
| NSUN2 | hsa-miR-4330      |
| NSUN2 | hsa-miR-195-3p    |
| NSUN2 | hsa-miR-7215-5p   |
| NSUN2 | hsa-miR-6957-5p   |
| NSUN2 | hsa-miR-29-5p     |
| NSUN2 | hsa-miR-1290      |
| NSUN2 | hsa-miR-873-5p    |
| NSUN2 | hsa-miR-516       |
| NSUN2 | hsa-miR-1205      |
| NSUN2 | hsa-miR-7281-3p   |
| NSUN2 | hsa-miR-6821-5p   |

|        |                 |
|--------|-----------------|
| NSUN2  | hsa-miR-6133    |
| NSUN2  | hsa-miR-4435    |
| NSUN2  | hsa-miR-499-5p  |
| NSUN2  | hsa-miR-193-3p  |
| NSUN2  | hsa-miR-3192-5p |
| NSUN2  | hsa-miR-429-3p  |
| NSUN2  | hsa-miR-7162-3p |
| NSUN2  | hsa-miR-1250-3p |
| NSUN2  | hsa-miR-7033-5p |
| NSUN2  | hsa-miR-1910-5p |
| NSUN2  | hsa-miR-136-5p  |
| NSUN2  | hsa-miR-6793-3p |
| NSUN2  | hsa-miR-1343-3p |
| NSUN2  | hsa-miR-1262-5p |
| NSUN2  | hsa-miR-2896    |
| NSUN2  | hsa-miR-8832    |
| NSUN2  | hsa-miR-7217-5p |
| NSUN2  | hsa-miR-1540-5p |
| NSUN2  | hsa-miR-3098-5p |
| NSUN2  | hsa-miR-4676-5p |
| NSUN2  | hsa-miR-2681-5p |
| NSUN2  | hsa-miR-4733-5p |
| NSUN2  | hsa-miR-335-3p  |
| NSUN2  | hsa-miR-7297-3p |
| NSUN2  | hsa-miR-631     |
| NSUN2  | hsa-miR-141-3p  |
| NSUN2  | hsa-miR-488-3p  |
| NSUN2  | hsa-miR-1297    |
| NUDT10 | hsa-miR-2446    |
| NUDT10 | hsa-miR-6828-3p |
| NUDT10 | hsa-miR-7688-3p |
| NUDT10 | hsa-miR-33-5p   |
| NUDT10 | hsa-miR-6907-5p |
| NUDT10 | hsa-miR-4294    |
| NUDT10 | hsa-miR-6952-3p |
| NUDT10 | hsa-miR-212-5p  |
| NUDT10 | hsa-miR-130b-5p |
| NUDT10 | hsa-miR-294-5p  |
| NUDT10 | hsa-miR-195-3p  |
| NUDT10 | hsa-miR-216a-5p |
| NUDT10 | hsa-miR-3146    |
| NUDT10 | hsa-miR-7173-3p |
| NUDT10 | hsa-miR-653     |
| NUDT10 | hsa-miR-186-5p  |
| NUDT10 | hsa-miR-8819    |
| NUDT10 | hsa-miR-8075    |

|        |                   |
|--------|-------------------|
| NUDT10 | hsa-miR-500b-5p   |
| NUDT10 | hsa-miR-7119-5p   |
| NUDT10 | hsa-miR-23-5p     |
| NUDT10 | hsa-miR-6829-3p   |
| NUDT10 | hsa-miR-3658      |
| NUDT10 | hsa-miR-4703-3p   |
| NUDT10 | hsa-miR-1913      |
| NUDT10 | hsa-miR-3079-5p   |
| NUDT10 | hsa-miR-5187-5p   |
| NUDT10 | hsa-miR-7174-5p   |
| NUDT10 | hsa-miR-1255      |
| NUDT10 | hsa-miR-6926-3p   |
| NUDT10 | hsa-miR-889       |
| NUDT10 | hsa-miR-5588-5p   |
| NUDT10 | hsa-miR-2355-3p   |
| NUDT10 | hsa-miR-3085-5p   |
| NUDT10 | hsa-miR-7229-3p   |
| NUDT10 | hsa-miR-6914-3p   |
| NUDT10 | hsa-miR-4325      |
| NUDT10 | hsa-miR-7a-1-3p   |
| NUDT10 | hsa-miR-4714-5p   |
| NUDT10 | hsa-miR-143-3p    |
| NUDT10 | hsa-miR-2411-3p   |
| NUDT10 | hsa-miR-214-3p    |
| NUDT10 | hsa-miR-141-3p    |
| NUDT10 | hsa-miR-487-3p    |
| NUDT10 | hsa-miR-7214-5p   |
| NUDT10 | hsa-miR-1264      |
| NUDT10 | hsa-miR-342-3p    |
| NUDT10 | hsa-miR-544b      |
| NUDT10 | hsa-miR-4691-3p   |
| NUDT10 | hsa-miR-295-5p    |
| NUDT10 | hsa-miR-599       |
| NUDT10 | hsa-miR-654-5p    |
| NUDT10 | hsa-miR-130-3p    |
| NUDT10 | hsa-miR-590-5p    |
| NUDT10 | hsa-miR-7157-3p   |
| NUDT10 | hsa-miR-2285g     |
| NUDT10 | hsa-miR-7094-1-5p |
| NUDT10 | hsa-miR-3157-3p   |
| NUDT10 | hsa-miR-6818-3p   |
| NUDT10 | hsa-miR-4669      |
| NUDT10 | hsa-miR-6841-3p   |
| NUDT10 | hsa-miR-2334      |
| NUDT10 | hsa-miR-541-5p    |
| NUDT10 | hsa-miR-6728-3p   |

|        |                  |
|--------|------------------|
| NUDT10 | hsa-miR-6743-5p  |
| NUDT10 | hsa-miR-6948-3p  |
| NUDT10 | hsa-miR-8839     |
| NUDT10 | hsa-miR-556-3p   |
| NUDT10 | hsa-miR-4659a-3p |
| NUDT10 | hsa-miR-1958     |
| NUDT10 | hsa-miR-18-3p    |
| NUDT10 | hsa-miR-302c-3p  |
| NUDT10 | hsa-miR-322-3p   |
| NUDT10 | hsa-miR-7069-5p  |
| NUDT10 | hsa-miR-3116     |
| NUDT10 | hsa-miR-501-5p   |
| NUDT10 | hsa-miR-3191-5p  |
| NUDT10 | hsa-miR-3163     |
| NUDT10 | hsa-miR-548ap-5p |
| NUDT10 | hsa-miR-409-3p   |
| NUDT10 | hsa-miR-7008-3p  |
| NUDT10 | hsa-miR-9768-3p  |
| NUDT10 | hsa-miR-5116     |
| NUDT10 | hsa-miR-5001-3p  |
| NUDT10 | hsa-miR-2054     |
| NUDT10 | hsa-miR-4524b-3p |
| NUDT10 | hsa-miR-3613b    |
| NUDT10 | hsa-miR-4799-5p  |
| NUDT10 | hsa-miR-4688     |
| NUDT10 | hsa-miR-8895     |
| NUDT10 | hsa-miR-6071     |
| NUDT10 | hsa-miR-7084-5p  |
| NUDT10 | hsa-miR-34b-3p   |
| NUDT10 | hsa-miR-6512-5p  |
| NUDT10 | hsa-miR-4422     |
| NUDT10 | hsa-miR-6938-3p  |
| NUDT10 | hsa-miR-7212-3p  |
| NUDT10 | hsa-miR-1284     |
| NUDT10 | hsa-miR-5011-5p  |
| NUDT10 | hsa-miR-1277-5p  |
| NUDT10 | hsa-miR-126b-5p  |
| NUDT10 | hsa-miR-6744-5p  |
| NUDT10 | hsa-miR-6920-5p  |
| NUDT10 | hsa-miR-7159-5p  |
| NUDT10 | hsa-miR-2409     |
| NUDT10 | hsa-miR-6969-5p  |
| NUDT10 | hsa-miR-378g     |
| NUDT10 | hsa-miR-4312     |
| NUDT10 | hsa-miR-6951-5p  |
| NUDT10 | hsa-miR-4699-3p  |

|        |                   |
|--------|-------------------|
| NUDT10 | hsa-miR-381-3p    |
| NUDT10 | hsa-miR-2426      |
| NUDT10 | hsa-miR-1254      |
| NUDT10 | hsa-miR-421-5p    |
| NUDT10 | hsa-miR-26        |
| NUDT10 | hsa-miR-6507-5p   |
| NUDT10 | hsa-miR-8843      |
| NUDT10 | hsa-miR-694       |
| NUDT10 | hsa-miR-2284z     |
| NUDT10 | hsa-miR-376a-2-5p |
| NUDT10 | hsa-miR-130a-3p   |
| NUDT10 | hsa-miR-26a-3p    |
| NUDT10 | hsa-miR-466ade-3p |
| NUDT10 | hsa-miR-2431-3p   |
| NUDT10 | hsa-miR-6960-5p   |
| NUDT10 | hsa-miR-2285af    |
| NUDT10 | hsa-miR-7658-3p   |
| NUDT10 | hsa-miR-323b-5p   |
| NUDT10 | hsa-miR-136-5p    |
| NUDT10 | hsa-miR-7202-3p   |
| NUDT10 | hsa-miR-452-5p    |
| NUDT10 | hsa-miR-7659-3p   |
| NUDT10 | hsa-miR-1434-3p   |
| NUDT10 | hsa-miR-500b-3p   |
| NUDT10 | hsa-miR-1193      |
| NUDT10 | hsa-miR-3544-3p   |
| NUDT10 | hsa-miR-350-3p    |
| NUDT10 | hsa-miR-494       |
| NUDT10 | hsa-miR-5190      |
| NUDT10 | hsa-miR-1-5p      |
| NUDT10 | hsa-miR-3622b-5p  |
| NUDT10 | hsa-miR-580-3p    |
| NUDT10 | hsa-miR-7049-5p   |
| NUDT10 | hsa-miR-4254      |
| NUDT10 | hsa-miR-9500      |
| NUDT10 | hsa-miR-2325b     |
| NUDT10 | hsa-miR-1968-3p   |
| NUDT10 | hsa-miR-4799-3p   |
| NUDT10 | hsa-miR-2284i     |
| NUDT10 | hsa-miR-384       |
| NUDT10 | hsa-miR-6927-3p   |
| NUDT10 | hsa-miR-7195-3p   |
| NUDT10 | hsa-miR-6728-5p   |
| NUDT10 | hsa-miR-764       |
| NUDT10 | hsa-miR-1178-3p   |
| NUDT10 | hsa-miR-8103      |

|        |                 |
|--------|-----------------|
| NUDT10 | hsa-miR-6540-3p |
| NUDT10 | hsa-miR-7234-5p |
| NUDT10 | hsa-miR-429-3p  |
| NUDT10 | hsa-miR-5681a   |
| NUDT10 | hsa-miR-8832    |
| NUDT10 | hsa-miR-4309    |
| NUDT10 | hsa-miR-7856-5p |
| NUDT10 | hsa-miR-5692a   |
| NUDT10 | hsa-miR-1956    |
| NUDT10 | hsa-miR-376e    |
| NUDT10 | hsa-miR-2284-5p |
| NUDT10 | hsa-miR-488-5p  |
| NUDT10 | hsa-miR-6945-3p |
| NUDT10 | hsa-miR-651     |
| NUDT10 | hsa-miR-302a-5p |
| NUDT10 | hsa-miR-8073    |
| NUDT10 | hsa-miR-470-5p  |
| NUDT10 | hsa-miR-664-3p  |
| NUDT10 | hsa-miR-619-3p  |
| NUDT10 | hsa-miR-650abc  |
| NUDT10 | hsa-miR-6509-5p |
| NUDT10 | hsa-miR-30-3p   |
| NUDT10 | hsa-miR-499b-5p |
| NUDT10 | hsa-miR-367-3p  |
| NUDT10 | hsa-miR-1296    |
| NUDT10 | hsa-miR-495-3p  |
| NUDT10 | hsa-miR-2285    |
| NUDT10 | hsa-miR-1957a   |
| NUDT10 | hsa-miR-619     |
| NUDT10 | hsa-miR-1287-3p |
| NUDT10 | hsa-miR-7009-3p |
| NUDT10 | hsa-miR-4789-3p |
| NUDT10 | hsa-miR-3962    |
| NUDT10 | hsa-miR-7191-5p |
| NUDT10 | hsa-miR-651-3p  |
| NUDT10 | hsa-miR-548i    |
| NUDT10 | hsa-miR-6899-3p |
| NUDT10 | hsa-miR-6791-3p |
| NUDT10 | hsa-miR-2285b   |
| NUDT10 | hsa-miR-136-5p  |
| NUDT10 | hsa-miR-4253    |
| NUDT10 | hsa-miR-640     |
| NUDT10 | hsa-miR-4762-5p |
| NUDT10 | hsa-miR-454     |
| NUDT10 | hsa-miR-5119    |
| NUDT10 | hsa-miR-556-5p  |



|        |                  |
|--------|------------------|
| NUDT10 | hsa-miR-7024-5p  |
| NUDT10 | hsa-miR-4480     |
| NUDT10 | hsa-miR-513b-5p  |
| NUDT10 | hsa-miR-301a-3p  |
| NUDT10 | hsa-miR-425-5p   |
| NUDT10 | hsa-miR-6971-3p  |
| NUDT10 | hsa-miR-487a-5p  |
| NUDT10 | hsa-miR-1943-3p  |
| NUDT10 | hsa-miR-7161-5p  |
| NUDT10 | hsa-miR-7675-3p  |
| NUDT10 | hsa-miR-8796     |
| NUDT10 | hsa-miR-7117-3p  |
| NUDT10 | hsa-miR-7199-5p  |
| NUDT10 | hsa-miR-1245-3p  |
| NUDT10 | hsa-miR-484      |
| NUDT10 | hsa-miR-6995-3p  |
| NUDT10 | hsa-miR-200a-3p  |
| NUDT10 | hsa-miR-6768-3p  |
| NUDT10 | hsa-miR-3160-3p  |
| NUDT10 | hsa-miR-4496     |
| NUDT10 | hsa-miR-7019-5p  |
| NUDT10 | hsa-miR-2285e    |
| NUDT10 | hsa-miR-1827     |
| NUDT10 | hsa-miR-556-5p   |
| NUDT10 | hsa-miR-3934-3p  |
| NUDT10 | hsa-miR-2317     |
| NUDT10 | hsa-miR-548ad-5p |
| NUDT10 | hsa-miR-541-3p   |
| NUDT10 | hsa-miR-520gh    |
| NUDT10 | hsa-miR-2439-3p  |
| NUDT10 | hsa-miR-149-3p   |
| NUDT10 | hsa-miR-3935     |
| NUDT10 | hsa-miR-6889-3p  |
| NUDT10 | hsa-miR-6373     |
| NUDT10 | hsa-miR-493      |
| NUDT10 | hsa-miR-938      |
| NUDT10 | hsa-miR-2420     |
| NUDT10 | hsa-miR-2384     |
| NUDT10 | hsa-miR-409      |
| NUDT10 | hsa-miR-137-3p   |
| NUDT10 | hsa-miR-3120-3p  |
| NUDT10 | hsa-miR-1283     |
| NUDT10 | hsa-miR-4753-5p  |
| NUDT10 | hsa-miR-2329-3p  |
| NUDT10 | hsa-miR-7678-3p  |
| NUDT10 | hsa-miR-153-5p   |

|        |                  |
|--------|------------------|
| NUDT10 | hsa-miR-3156-5p  |
| NUDT10 | hsa-miR-2320-5p  |
| NUDT10 | hsa-miR-340-5p   |
| NUDT10 | hsa-miR-6947-3p  |
| NUDT10 | hsa-miR-548e-5p  |
| NUDT10 | hsa-miR-342-3p   |
| NUDT10 | hsa-miR-1285-5p  |
| NUDT10 | hsa-miR-4803     |
| NUDT10 | hsa-miR-3692-5p  |
| NUDT10 | hsa-miR-1178-3p  |
| NUDT10 | hsa-let-7ag-3p   |
| NUDT10 | hsa-miR-421      |
| NUDT10 | hsa-miR-142      |
| NUDT10 | hsa-miR-1243-5p  |
| NUDT10 | hsa-miR-22-3p    |
| NUDT10 | hsa-miR-582-5p   |
| NUDT10 | hsa-miR-5706     |
| NUDT10 | hsa-miR-693-5p   |
| NUDT10 | hsa-miR-1-3p     |
| NUDT10 | hsa-miR-616-3p   |
| NUDT10 | hsa-miR-196a-3p  |
| NUDT10 | hsa-miR-487a-3p  |
| NUDT10 | hsa-miR-7176-3p  |
| NUDT10 | hsa-miR-3182     |
| NUDT10 | hsa-miR-8901     |
| NUDT10 | hsa-miR-4635     |
| NUDT10 | hsa-miR-548y     |
| NUDT10 | hsa-miR-6511a-5p |
| NUDT10 | hsa-miR-133b-5p  |
| NUDT10 | hsa-miR-301-5p   |
| NUDT10 | hsa-miR-585-3p   |
| NUDT10 | hsa-miR-7238-3p  |
| NUDT10 | hsa-miR-134-5p   |
| NUDT10 | hsa-miR-141-3p   |
| NUDT10 | hsa-miR-4659b-3p |
| NUDT10 | hsa-miR-7182-3p  |
| NUDT10 | hsa-miR-20-3p    |
| NUDT10 | hsa-miR-3657     |
| NUDT10 | hsa-miR-4724-5p  |
| NUDT10 | hsa-miR-487b-5p  |
| NUDT10 | hsa-miR-292b-5p  |
| NUDT10 | hsa-miR-544-5p   |
| NUDT10 | hsa-miR-548as-3p |
| NUDT10 | hsa-miR-6955-3p  |
| NUDT10 | hsa-miR-382-3p   |
| NUDT10 | hsa-miR-7037-3p  |

|        |                   |
|--------|-------------------|
| NUDT10 | hsa-miR-23a-3p    |
| NUDT10 | hsa-miR-16-2-3p   |
| NUDT10 | hsa-miR-6958-3p   |
| NUDT10 | hsa-miR-5703      |
| NUDT10 | hsa-miR-6813-5p   |
| NUDT10 | hsa-miR-548ar-5p  |
| NUDT10 | hsa-miR-23c       |
| NUDT10 | hsa-miR-636       |
| NUDT10 | hsa-miR-550       |
| NUDT10 | hsa-miR-363-3p    |
| NUDT10 | hsa-miR-7641      |
| NUDT10 | hsa-miR-3119      |
| NUDT10 | hsa-miR-8118      |
| NUDT10 | hsa-miR-607       |
| NUDT10 | hsa-miR-4753-3p   |
| NUDT10 | hsa-miR-6120-5p   |
| NUDT10 | hsa-miR-1721      |
| NUDT10 | hsa-miR-2339      |
| NUDT10 | hsa-miR-548h-5p   |
| NUDT10 | hsa-miR-3668      |
| NUDT10 | hsa-miR-3924      |
| NUDT10 | hsa-miR-380-3p    |
| NUDT10 | hsa-miR-1843      |
| NUDT10 | hsa-miR-934       |
| NUDT10 | hsa-miR-369-3p    |
| NUDT10 | hsa-miR-339-5p    |
| NUDT10 | hsa-miR-344d-2-5p |
| NUDT10 | hsa-miR-3977      |
| NUDT10 | hsa-miR-548ak     |
| NUDT10 | hsa-miR-654-3p    |
| NUDT10 | hsa-miR-7026-3p   |
| NUDT10 | hsa-miR-673-5p    |
| NUDT10 | hsa-miR-4782-5p   |
| NUDT10 | hsa-miR-3074-2-3p |
| NUDT10 | hsa-miR-548       |
| NUDT10 | hsa-miR-199-5p    |
| NUDT10 | hsa-let-7g-3p     |
| NUDT10 | hsa-miR-33a-3p    |
| NUDT10 | hsa-miR-4691-5p   |
| NUDT10 | hsa-miR-593-3p    |
| NUDT10 | hsa-miR-1224-5p   |
| NUDT10 | hsa-miR-2284aa    |
| NUDT10 | hsa-miR-548au-5p  |
| NUDT10 | hsa-miR-2479      |
| NUDT10 | hsa-miR-351-3p    |
| NUDT10 | hsa-miR-548am-5p  |

|        |                   |
|--------|-------------------|
| NUDT10 | hsa-miR-200a-5p   |
| NUDT10 | hsa-miR-2464-3p   |
| NUDT10 | hsa-miR-345-3p    |
| NUDT10 | hsa-miR-518a-5p   |
| NUDT10 | hsa-miR-466mo-3p  |
| NUDT10 | hsa-miR-218-5p    |
| NUDT10 | hsa-miR-324       |
| NUDT10 | hsa-miR-6742-3p   |
| NUDT10 | hsa-miR-2393      |
| NUDT10 | hsa-miR-2459      |
| NUDT10 | hsa-miR-527       |
| NUDT10 | hsa-miR-3074-3p   |
| NUDT10 | hsa-miR-3922-5p   |
| NUDT10 | hsa-miR-490-3p    |
| NUDT10 | hsa-miR-4751      |
| NUDT10 | hsa-miR-653-5p    |
| NUDT10 | hsa-miR-7687-3p   |
| NUDT10 | hsa-miR-1953      |
| NUDT10 | hsa-miR-6529-3p   |
| NUDT10 | hsa-miR-549-5p    |
| NUDT10 | hsa-miR-2367-5p   |
| NUDT10 | hsa-miR-582-5p    |
| NUDT10 | hsa-miR-616-3p    |
| NUDT10 | hsa-miR-26-5p     |
| NUDT10 | hsa-miR-4788      |
| NUDT10 | hsa-miR-7652-3p   |
| NUDT10 | hsa-miR-409b      |
| NUDT10 | hsa-miR-4263      |
| NUDT10 | hsa-miR-6344      |
| NUDT10 | hsa-miR-7-3p      |
| NUDT10 | hsa-miR-4445-5p   |
| NUDT10 | hsa-miR-548a-5p   |
| NUDT10 | hsa-miR-219-5p    |
| NUDT10 | hsa-miR-3071-5p   |
| NUDT10 | hsa-miR-6391      |
| NUDT10 | hsa-miR-548j-5p   |
| NUDT10 | hsa-miR-9769-5p   |
| NUDT10 | hsa-miR-467g      |
| NUDT10 | hsa-miR-7187-3p   |
| NUDT10 | hsa-miR-181b-1-3p |
| NUDT10 | hsa-miR-3670      |
| NUDT10 | hsa-miR-224-5p    |
| NUDT10 | hsa-miR-550a-5p   |
| NUDT10 | hsa-miR-548d-5p   |
| NUDT10 | hsa-miR-5582-5p   |
| NUDT10 | hsa-miR-206       |

|        |                  |
|--------|------------------|
| NUDT10 | hsa-miR-2458     |
| NUDT10 | hsa-miR-3973     |
| NUDT10 | hsa-miR-376abd   |
| NUDT10 | hsa-miR-376ab    |
| NUDT10 | hsa-miR-4528     |
| NUDT10 | hsa-miR-3617-3p  |
| NUDT10 | hsa-miR-6529-5p  |
| NUDT10 | hsa-miR-2418     |
| NUDT10 | hsa-miR-548aw    |
| NUDT10 | hsa-miR-656      |
| NUDT10 | hsa-miR-1952     |
| NUDT10 | hsa-miR-129-5p   |
| NUDT10 | hsa-miR-374      |
| NUDT10 | hsa-miR-486-5p   |
| NUDT10 | hsa-miR-324-3p   |
| NUDT10 | hsa-miR-5583-3p  |
| NUDT10 | hsa-miR-592-3p   |
| NUDT10 | hsa-miR-3057-3p  |
| NUDT10 | hsa-miR-6998-3p  |
| NUDT10 | hsa-miR-3157-5p  |
| NUDT10 | hsa-miR-137      |
| NUDT10 | hsa-miR-7078-3p  |
| NUDT10 | hsa-miR-628-3p   |
| NUDT10 | hsa-miR-871-5p   |
| NUDT10 | hsa-miR-518-5p   |
| NUDT10 | hsa-miR-143-3p   |
| NUDT10 | hsa-miR-1668     |
| NUDT10 | hsa-miR-216b     |
| NUDT10 | hsa-miR-548as-5p |
| NUDT10 | hsa-miR-23       |
| NUDT10 | hsa-miR-548aa    |
| NUDT10 | hsa-miR-6537-5p  |
| NUDT10 | hsa-miR-6937-3p  |
| NUDT10 | hsa-miR-3154     |
| NUDT10 | hsa-miR-7844-5p  |
| NUDT10 | hsa-miR-4320     |
| NUDT10 | hsa-miR-578      |
| NUDT10 | hsa-miR-16-1-3p  |
| NUDT10 | hsa-miR-3112-3p  |
| NUDT10 | hsa-miR-4671-3p  |
| NUDT10 | hsa-miR-4717-5p  |
| NUDT10 | hsa-miR-1256     |
| NUDT10 | hsa-miR-3198     |
| NUDT10 | hsa-miR-504-3p   |
| NUDT10 | hsa-miR-5622-5p  |
| NUDT10 | hsa-miR-4504     |

|        |                   |
|--------|-------------------|
| NUDT10 | hsa-miR-532-5p    |
| NUDT10 | hsa-miR-1b-5p     |
| NUDT10 | hsa-miR-302bd     |
| NUDT10 | hsa-miR-5101      |
| NUDT10 | hsa-miR-7849-3p   |
| NUDT10 | hsa-miR-7033-3p   |
| NUDT10 | hsa-miR-200c-3p   |
| NUDT10 | hsa-miR-2284q     |
| NUDT10 | hsa-miR-3074-1-3p |
| NUDT10 | hsa-miR-452-3p    |
| NUDT10 | hsa-miR-502-5p    |
| NUDT10 | hsa-miR-200c-3p   |
| NUDT10 | hsa-miR-205-5p    |
| NUDT10 | hsa-miR-34a-3p    |
| NUDT10 | hsa-miR-7650-3p   |
| NUDT10 | hsa-let-7-3p      |
| NUDT10 | hsa-miR-548c-5p   |
| NUDT10 | hsa-miR-669p-3p   |
| NUDT10 | hsa-miR-1298-3p   |
| NUDT10 | hsa-miR-301       |
| NUDT10 | hsa-miR-18b-3p    |
| NUDT10 | hsa-miR-3117-5p   |
| NUDT10 | hsa-miR-548b-5p   |
| NUDT10 | hsa-miR-7227-5p   |
| NUDT10 | hsa-miR-548w      |
| NUDT10 | hsa-miR-3071-3p   |
| NUDT10 | hsa-miR-7002-5p   |
| NUDT10 | hsa-miR-5196-3p   |
| NUDT10 | hsa-miR-6818-5p   |
| NUDT10 | hsa-miR-330-3p.2  |
| NUDT10 | hsa-miR-27b-5p    |
| NUDT10 | hsa-miR-934-5p    |
| NUDT10 | hsa-miR-548u      |
| NUDT10 | hsa-miR-7093-5p   |
| NUDT10 | hsa-miR-301b-3p   |
| NUDT10 | hsa-miR-3612      |
| NUDT10 | hsa-miR-203-3p.1  |
| NUDT10 | hsa-miR-3664-5p   |
| NUDT10 | hsa-miR-677       |
| NUDT10 | hsa-miR-675-3p    |
| NUDT10 | hsa-miR-520       |
| NUDT10 | hsa-miR-7057-5p   |
| NUDT10 | hsa-miR-4437      |
| NUDT10 | hsa-miR-1265      |
| NUDT10 | hsa-miR-1251-3p   |
| NUDT10 | hsa-miR-7230-3p   |

|        |                  |
|--------|------------------|
| NUDT10 | hsa-miR-1981-5p  |
| NUDT10 | hsa-miR-4795-3p  |
| NUDT10 | hsa-miR-382-5p   |
| NUDT10 | hsa-miR-516      |
| NUDT10 | hsa-miR-7086-5p  |
| NUDT10 | hsa-miR-7023-5p  |
| NUDT10 | hsa-miR-3200-5p  |
| NUDT10 | hsa-miR-30       |
| NUDT10 | hsa-miR-508a     |
| NUDT10 | hsa-miR-378      |
| NUDT10 | hsa-miR-501-3p   |
| NUDT10 | hsa-miR-3065-5p  |
| NUDT10 | hsa-miR-654-5p   |
| NUDT10 | hsa-miR-4289     |
| NUDT10 | hsa-miR-6980-5p  |
| NUDT10 | hsa-miR-17-3p    |
| NUDT10 | hsa-miR-593-3p   |
| NUDT10 | hsa-miR-2364     |
| NUDT10 | hsa-miR-3942-5p  |
| NUDT10 | hsa-miR-4649-3p  |
| NUDT10 | hsa-miR-548ay-5p |
| NUDT10 | hsa-miR-4434     |
| NUDT10 | hsa-miR-3138     |
| NUDT10 | hsa-miR-3145-3p  |
| NUDT10 | hsa-miR-6388     |
| NUDT10 | hsa-miR-2285d    |
| NUDT10 | hsa-miR-2369     |
| NUDT10 | hsa-miR-8104     |
| NUDT10 | hsa-miR-3160-5p  |
| NUDT10 | hsa-miR-3097-5p  |
| NUDT10 | hsa-miR-3618     |
| NUDT10 | hsa-miR-505-3p.2 |
| NUDT10 | hsa-miR-2284ac   |
| NUDT10 | hsa-miR-425      |
| NUDT10 | hsa-miR-550-5p   |
| NUDT10 | hsa-miR-7667-5p  |
| NUDT10 | hsa-miR-660-3p   |
| NUDT10 | hsa-miR-129-5p   |
| NUDT10 | hsa-miR-429      |
| NUDT10 | hsa-miR-1255-5p  |
| NUDT10 | hsa-miR-548bb-5p |
| NUDT10 | hsa-miR-1264-3p  |
| NUDT10 | hsa-miR-3121-3p  |
| NUDT10 | hsa-miR-8881     |
| NUDT10 | hsa-miR-10a-3p   |
| NUDT10 | hsa-miR-325      |

|        |                  |
|--------|------------------|
| NUDT10 | hsa-miR-1255b-5p |
| NUDT10 | hsa-miR-490-3p   |
| NUDT10 | hsa-miR-6852-5p  |
| NUDT10 | hsa-miR-8902     |
| NUDT10 | hsa-miR-301-3p   |
| NUDT10 | hsa-let-7a-2-3p  |
| NUDT10 | hsa-miR-3084-5p  |
| NUDT10 | hsa-miR-2307     |
| NUDT10 | hsa-miR-761      |
| NUDT10 | hsa-miR-3121-3p  |
| NUDT10 | hsa-miR-5683     |
| NUDT10 | hsa-miR-6833-3p  |
| NUDT10 | hsa-miR-130b-3p  |
| NUDT10 | hsa-miR-127-5p   |
| NUDT10 | hsa-miR-574-3p   |
| NUDT10 | hsa-miR-192-3p   |
| NUDT10 | hsa-miR-362-5p   |
| NUDT10 | hsa-miR-2473     |
| NUDT10 | hsa-miR-6882-3p  |
| NUDT10 | hsa-miR-302b-5p  |
| NUDT10 | hsa-miR-542-3p   |
| NUDT10 | hsa-miR-181b-3p  |
| NUDT10 | hsa-miR-548t-3p  |
| NUDT10 | hsa-miR-5008-3p  |
| NUDT10 | hsa-miR-154-3p   |
| NUDT10 | hsa-miR-92a-5p   |
| NUDT10 | hsa-miR-18a-3p   |
| NUDT10 | hsa-miR-449b-3p  |
| NUDT10 | hsa-miR-122      |
| NUDT10 | hsa-miR-684      |
| NUDT10 | hsa-miR-2475     |
| NUDT10 | hsa-miR-23b-3p   |
| NUDT10 | hsa-miR-221-5p   |
| NUDT10 | hsa-miR-1250-3p  |
| NUDT10 | hsa-miR-9-3p     |
| NUDT10 | hsa-miR-8871     |
| NUDT10 | hsa-miR-2957     |
| NUDT10 | hsa-miR-7021-3p  |
| NUDT10 | hsa-miR-432-5p   |
| NUDT10 | hsa-miR-1200     |
| NUDT10 | hsa-miR-412-3p   |
| NUDT10 | hsa-miR-4443     |
| NUDT10 | hsa-miR-8805     |
| NUDT10 | hsa-miR-6947-5p  |
| NUDT10 | hsa-miR-1343-3p  |
| NUDT10 | hsa-miR-6959-5p  |



|        |                  |
|--------|------------------|
| NUDT10 | hsa-miR-290b-5p  |
| NUDT10 | hsa-miR-1a-5p    |
| NUDT10 | hsa-miR-200ab-5p |
| NUDT10 | hsa-miR-2898     |
| NUDT10 | hsa-miR-502-5p   |
| NUDT10 | hsa-miR-8821     |
| NUDT10 | hsa-miR-93-3p    |
| NUDT10 | hsa-miR-9-3-3p   |
| NUDT10 | hsa-miR-7151-5p  |
| NUDT10 | hsa-miR-4720-5p  |
| NUDT10 | hsa-miR-653-3p   |
| NUDT10 | hsa-miR-6789-5p  |
| NUDT10 | hsa-miR-130      |
| NUDT10 | hsa-miR-6740-5p  |
| NUDT10 | hsa-miR-432-5p   |
| NUDT10 | hsa-miR-8113     |
| NUDT10 | hsa-miR-548o-5p  |
| NUDT10 | hsa-miR-669c-5p  |
| NUDT10 | hsa-miR-552-5p   |
| NUDT10 | hsa-miR-4531     |
| NUDT10 | hsa-miR-7056-3p  |
| NUDT10 | hsa-miR-1193-3p  |
| NUDT10 | hsa-miR-6870-3p  |
| NUDT10 | hsa-miR-6964-3p  |
| NUDT10 | hsa-miR-6792-3p  |
| NUDT10 | hsa-miR-4727-5p  |
| NUDT10 | hsa-miR-5625-3p  |
| NUDT10 | hsa-miR-300-5p   |
| NUDT10 | hsa-miR-4276     |
| NUDT10 | hsa-miR-6085     |
| NUDT10 | hsa-miR-508-3p   |
| NUDT10 | hsa-miR-6950-3p  |
| NUDT10 | hsa-miR-3143     |
| NUDT10 | hsa-miR-552-3p   |
| NUDT10 | hsa-miR-3068-5p  |
| NUDT10 | hsa-miR-32-3p    |
| NUDT10 | hsa-miR-548ae-5p |
| NUDT10 | hsa-miR-877-5p   |
| NUDT10 | hsa-miR-15b-3p   |
| NUDT10 | hsa-miR-944      |
| NUDT10 | hsa-miR-410-3p   |
| NUDT10 | hsa-miR-6895-3p  |
| NUDT10 | hsa-miR-4769-3p  |
| NUDT10 | hsa-miR-216a-3p  |
| NUDT10 | hsa-miR-488-3p   |
| NUDT10 | hsa-miR-5088-3p  |

|        |                  |
|--------|------------------|
| NUDT10 | hsa-miR-4674     |
| NUDT10 | hsa-miR-7225-3p  |
| NUDT10 | hsa-miR-6348     |
| NUDT10 | hsa-miR-219b-5p  |
| NUDT10 | hsa-miR-5124a    |
| NUDT10 | hsa-miR-22-3p    |
| NUDT10 | hsa-miR-539-5p   |
| NUDT10 | hsa-miR-4539     |
| NUDT10 | hsa-miR-500-3p   |
| NUDT10 | hsa-miR-3100-3p  |
| NUDT10 | hsa-miR-514a-5p  |
| NUDT10 | hsa-miR-6965-3p  |
| NUDT10 | hsa-miR-6884-3p  |
| NUDT10 | hsa-miR-2469     |
| NUDT10 | hsa-miR-7053-3p  |
| NUDT10 | hsa-miR-292a-5p  |
| NUDT10 | hsa-miR-344-3p   |
| NUDT10 | hsa-miR-6798-3p  |
| NUDT10 | hsa-miR-4314     |
| NUDT10 | hsa-miR-889-3p   |
| NUDT10 | hsa-miR-1185-5p  |
| NUDT10 | hsa-miR-4280     |
| NUDT10 | hsa-miR-2355-5p  |
| NUDT10 | hsa-miR-200-3p   |
| NUDT10 | hsa-miR-6941-5p  |
| NUDT10 | hsa-miR-6416-3p  |
| NUDT10 | hsa-miR-4793-5p  |
| NUDT10 | hsa-miR-340-5p   |
| NUDT10 | hsa-miR-548at-3p |
| NUDT10 | hsa-miR-4516     |
| NUDT10 | hsa-miR-674-5p   |
| NUDT10 | hsa-miR-6738-3p  |
| NUDT10 | hsa-miR-661      |
| NUDT10 | hsa-miR-374b-5p  |
| NUDT10 | hsa-miR-520g-3p  |
| NUDT10 | hsa-miR-7646-5p  |
| NUDT10 | hsa-miR-7660-3p  |
| NUDT10 | hsa-miR-676-5p   |
| NUDT10 | hsa-miR-6737-3p  |
| NUDT10 | hsa-miR-558      |
| NUDT10 | hsa-miR-454-3p   |
| NUDT10 | hsa-miR-669o-5p  |
| NUDT10 | hsa-miR-7030-3p  |
| NUDT10 | hsa-miR-606      |
| NUDT10 | hsa-miR-320a     |
| NUDT10 | hsa-miR-200      |

|        |                   |
|--------|-------------------|
| NUDT10 | hsa-miR-2358      |
| NUDT10 | hsa-miR-1248      |
| NUDT10 | hsa-miR-4744      |
| NUDT10 | hsa-miR-494-3p    |
| NUDT10 | hsa-miR-7843-3p   |
| NUDT10 | hsa-miR-3613-3p   |
| NUDT10 | hsa-miR-101-3p.2  |
| NUDT10 | hsa-miR-548aq-5p  |
| NUDT10 | hsa-miR-4324      |
| NUDT10 | hsa-miR-26-3p     |
| NUDT10 | hsa-miR-7061-5p   |
| NUDT10 | hsa-miR-552       |
| NUDT10 | hsa-miR-2285c     |
| NUDT10 | hsa-miR-3075-5p   |
| NUDT10 | hsa-miR-122-5p    |
| NUDT10 | hsa-miR-3607-5p   |
| NUDT10 | hsa-miR-2284w     |
| NUDT10 | hsa-miR-222-5p    |
| NUDT10 | hsa-miR-1276      |
| NUDT10 | hsa-miR-6896-3p   |
| NUDT10 | hsa-miR-655       |
| NUDT10 | hsa-miR-8880      |
| NUDT10 | hsa-miR-548ab     |
| NUDT10 | hsa-miR-6839-5p   |
| NUDT10 | hsa-miR-468-5p    |
| NUDT10 | hsa-miR-7012-5p   |
| NUDT10 | hsa-miR-7168-5p   |
| NUDT10 | hsa-miR-758-3p    |
| NUDT10 | hsa-miR-3192-5p   |
| NUDT10 | hsa-miR-619-5p    |
| NUDT10 | hsa-miR-139-5p    |
| NUDT10 | hsa-miR-580-5p    |
| NUDT10 | hsa-miR-4433b-3p  |
| NUDT10 | hsa-miR-6817-5p   |
| NUDT10 | hsa-miR-6885-3p   |
| NUDT10 | hsa-miR-548ay-3p  |
| NUDT10 | hsa-miR-7865      |
| NUDT10 | hsa-miR-218-5p    |
| NUDT10 | hsa-miR-374c-5p   |
| NUDT10 | hsa-miR-7169-5p   |
| NUDT10 | hsa-miR-742-3p    |
| NUDT10 | hsa-miR-524-5p    |
| NUDT10 | hsa-miR-548cej-3p |
| NUDT10 | hsa-miR-2392      |
| NUDT10 | hsa-miR-3976      |
| NUDT10 | hsa-miR-2448-3p   |

|        |                   |
|--------|-------------------|
| NUDT10 | hsa-miR-4261      |
| NUDT10 | hsa-miR-7207-3p   |
| NUDT10 | hsa-miR-630       |
| NUDT10 | hsa-miR-7177-3p   |
| NUDT10 | hsa-miR-302d-5p   |
| NUDT10 | hsa-miR-6809-3p   |
| NUDT10 | hsa-miR-3185      |
| NUDT10 | hsa-miR-6758-3p   |
| NUDT10 | hsa-miR-7684-5p   |
| NUDT10 | hsa-miR-580       |
| NUDT10 | hsa-miR-550b-2-5p |
| NUDT10 | hsa-miR-3184-3p   |
| NUDT10 | hsa-miR-939-3p    |
| NUDT10 | hsa-miR-3653-5p   |
| NUDT10 | hsa-miR-126-5p    |
| NUDT10 | hsa-miR-576-5p    |
| NUDT10 | hsa-miR-3059-3p   |
| NUDT10 | hsa-miR-6862-5p   |
| NUDT10 | hsa-miR-302c-5p   |
| NUDT10 | hsa-miR-5004-5p   |
| NUDT10 | hsa-miR-4768-5p   |
| NUDT10 | hsa-miR-547-5p    |
| NUDT10 | hsa-miR-130a-5p   |
| NUDT10 | hsa-miR-204-3p    |
| NUDT10 | hsa-miR-4646-5p   |
| NUDT10 | hsa-miR-4509      |
| NUDT10 | hsa-miR-6403      |
| NUDT10 | hsa-miR-219-3p    |
| NUDT10 | hsa-miR-516b-5p   |
| NUDT10 | hsa-miR-561-5p    |
| NUDT10 | hsa-miR-8119      |
| NUDT10 | hsa-miR-486-5p    |
| NUDT10 | hsa-miR-7158-3p   |
| NUDT10 | hsa-miR-550a-3-5p |
| NUDT10 | hsa-miR-574-5p    |
| NUDT10 | hsa-miR-7192-3p   |
| NUDT10 | hsa-miR-2421      |
| NUDT10 | hsa-miR-224-5p    |
| NUDT10 | hsa-miR-1306-3p   |
| NUDT10 | hsa-miR-487a      |
| NUDT10 | hsa-miR-1983      |
| NUDT10 | hsa-miR-513       |
| NUDT10 | hsa-miR-140-3p.1  |
| NUDT10 | hsa-miR-290a-5p   |
| NUDT10 | hsa-miR-559       |
| NUDT10 | hsa-miR-599-5p    |

|        |                  |
|--------|------------------|
| NUDT10 | hsa-miR-6966-3p  |
| NUDT10 | hsa-miR-3075-3p  |
| NUDT10 | hsa-miR-1271-3p  |
| NUDT10 | hsa-miR-7646-3p  |
| NUDT10 | hsa-miR-942-5p   |
| NUDT10 | hsa-miR-4521     |
| NUDT10 | hsa-miR-147a     |
| NUDT10 | hsa-miR-677-5p   |
| NUDT10 | hsa-miR-642-3p   |
| NUDT10 | hsa-miR-3155a    |
| NUDT10 | hsa-miR-212-3p   |
| NUDT10 | hsa-miR-1915-5p  |
| NUDT10 | hsa-miR-450b-5p  |
| NUDT10 | hsa-miR-2325c    |
| NUDT10 | hsa-miR-6919-5p  |
| NUDT10 | hsa-miR-410      |
| NUDT10 | hsa-miR-200a-3p  |
| NUDT10 | hsa-miR-487-5p   |
| NUDT10 | hsa-miR-6506-5p  |
| NUDT10 | hsa-miR-29       |
| NUDT10 | hsa-miR-3189-3p  |
| NUDT10 | hsa-miR-223-3p   |
| NUDT10 | hsa-miR-20b-3p   |
| NUDT10 | hsa-miR-297bc-3p |
| NUDT10 | hsa-miR-16-3p    |
| NUDT10 | hsa-miR-190a-5p  |
| NUDT10 | hsa-miR-6903-5p  |
| NUDT10 | hsa-miR-548ap-3p |
| NUDT10 | hsa-miR-216a     |
| NUDT10 | hsa-miR-223-5p   |
| NUDT10 | hsa-miR-3161     |
| NUDT10 | hsa-miR-2404     |
| NUDT10 | hsa-miR-4487     |
| NUDT10 | hsa-miR-23-3p    |
| NUDT10 | hsa-miR-383-3p   |
| NUDT10 | hsa-miR-378j     |
| NUDT10 | hsa-miR-4305     |
| NUDT10 | hsa-miR-1896     |
| NUDT10 | hsa-miR-1255a    |
| NUDT10 | hsa-miR-3671     |
| NUDT10 | hsa-miR-4695-3p  |
| NUDT10 | hsa-miR-1910-3p  |
| NUDT10 | hsa-miR-6381     |
| NUDT10 | hsa-miR-4517     |
| NUDT10 | hsa-miR-628-3p   |
| NUDT10 | hsa-miR-335-5p   |

|        |                  |
|--------|------------------|
| NUDT10 | hsa-miR-503-3p   |
| NUDT10 | hsa-miR-4662-5p  |
| NUDT11 | hsa-miR-212-5p   |
| NUDT11 | hsa-miR-7068-3p  |
| NUDT11 | hsa-miR-26       |
| NUDT11 | hsa-miR-31-5p    |
| NUDT11 | hsa-miR-650      |
| NUDT11 | hsa-miR-760-5p   |
| NUDT11 | hsa-miR-3059-5p  |
| NUDT11 | hsa-miR-6800-5p  |
| NUDT11 | hsa-miR-8074     |
| NUDT11 | hsa-miR-4693-5p  |
| NUDT11 | hsa-miR-2285     |
| NUDT11 | hsa-miR-376c     |
| NUDT11 | hsa-miR-4662b    |
| NUDT11 | hsa-miR-502-3p   |
| NUDT11 | hsa-miR-3622a-3p |
| NUDT11 | hsa-miR-190-3p   |
| NUDT11 | hsa-miR-889      |
| NUDT11 | hsa-miR-556-5p   |
| NUDT11 | hsa-miR-8861     |
| NUDT11 | hsa-miR-8845     |
| NUDT11 | hsa-miR-548g-3p  |
| NUDT11 | hsa-miR-10-5p    |
| NUDT11 | hsa-miR-670-5p   |
| NUDT11 | hsa-miR-548d-5p  |
| NUDT11 | hsa-miR-545-5p   |
| NUDT11 | hsa-miR-4524b-3p |
| NUDT11 | hsa-miR-33a-3p   |
| NUDT11 | hsa-miR-4294     |
| NUDT11 | hsa-miR-4680-3p  |
| NUDT11 | hsa-miR-5692a    |
| NUDT11 | hsa-let-7c-1-3p  |
| NUDT11 | hsa-miR-5684     |
| NUDT11 | hsa-miR-8868     |
| NUDT11 | hsa-miR-132-3p   |
| NUDT11 | hsa-miR-4660     |
| NUDT11 | hsa-miR-342-3p   |
| NUDT11 | hsa-miR-2285h    |
| NUDT11 | hsa-miR-7046-3p  |
| NUDT11 | hsa-miR-2315     |
| NUDT11 | hsa-miR-654-5p   |
| NUDT11 | hsa-miR-140-5p   |
| NUDT11 | hsa-miR-1284     |
| NUDT11 | hsa-miR-3120-3p  |
| NUDT11 | hsa-miR-3613b    |

|        |                  |
|--------|------------------|
| NUDT11 | hsa-miR-6501-3p  |
| NUDT11 | hsa-miR-7081-3p  |
| NUDT11 | hsa-miR-330-3p   |
| NUDT11 | hsa-miR-596      |
| NUDT11 | hsa-miR-549a     |
| NUDT11 | hsa-miR-7683-3p  |
| NUDT11 | hsa-miR-2475     |
| NUDT11 | hsa-miR-3128     |
| NUDT11 | hsa-miR-323      |
| NUDT11 | hsa-miR-33-5p    |
| NUDT11 | hsa-miR-7236-5p  |
| NUDT11 | hsa-miR-351-5p   |
| NUDT11 | hsa-miR-669c-3p  |
| NUDT11 | hsa-miR-7859     |
| NUDT11 | hsa-miR-6960-5p  |
| NUDT11 | hsa-miR-6822-3p  |
| NUDT11 | hsa-miR-299a-5p  |
| NUDT11 | hsa-miR-1434-3p  |
| NUDT11 | hsa-miR-548e-5p  |
| NUDT11 | hsa-miR-7041-5p  |
| NUDT11 | hsa-miR-425-5p   |
| NUDT11 | hsa-miR-3065-3p  |
| NUDT11 | hsa-miR-6715b-3p |
| NUDT11 | hsa-miR-548a1    |
| NUDT11 | hsa-miR-1305     |
| NUDT11 | hsa-miR-205-3p   |
| NUDT11 | hsa-miR-1296     |
| NUDT11 | hsa-miR-219-3p   |
| NUDT11 | hsa-miR-2409     |
| NUDT11 | hsa-miR-892a     |
| NUDT11 | hsa-miR-199      |
| NUDT11 | hsa-miR-29a-3p   |
| NUDT11 | hsa-miR-548d-3p  |
| NUDT11 | hsa-miR-7191-3p  |
| NUDT11 | hsa-miR-1301-3p  |
| NUDT11 | hsa-miR-2406     |
| NUDT11 | hsa-miR-651-3p   |
| NUDT11 | hsa-miR-3061-3p  |
| NUDT11 | hsa-miR-578      |
| NUDT11 | hsa-miR-2285t    |
| NUDT11 | hsa-miR-4275     |
| NUDT11 | hsa-miR-3166     |
| NUDT11 | hsa-miR-1943-3p  |
| NUDT11 | hsa-miR-4680-5p  |
| NUDT11 | hsa-miR-2397-3p  |
| NUDT11 | hsa-miR-29b-3p   |

|        |                  |
|--------|------------------|
| NUDT11 | hsa-miR-33-3p    |
| NUDT11 | hsa-miR-7065-3p  |
| NUDT11 | hsa-miR-644a     |
| NUDT11 | hsa-miR-8089     |
| NUDT11 | hsa-miR-5685     |
| NUDT11 | hsa-miR-597      |
| NUDT11 | hsa-miR-340-5p   |
| NUDT11 | hsa-miR-7670-5p  |
| NUDT11 | hsa-miR-7864     |
| NUDT11 | hsa-miR-7221-5p  |
| NUDT11 | hsa-miR-3150b-3p |
| NUDT11 | hsa-miR-141-3p   |
| NUDT11 | hsa-miR-1950     |
| NUDT11 | hsa-miR-421      |
| NUDT11 | hsa-miR-224-3p   |
| NUDT11 | hsa-miR-30       |
| NUDT11 | hsa-miR-539-3p   |
| NUDT11 | hsa-miR-6892-3p  |
| NUDT11 | hsa-miR-4263     |
| NUDT11 | hsa-miR-452-5p   |
| NUDT11 | hsa-miR-3173-3p  |
| NUDT11 | hsa-miR-188-5p   |
| NUDT11 | hsa-miR-582-5p   |
| NUDT11 | hsa-miR-3157-3p  |
| NUDT11 | hsa-miR-6879-5p  |
| NUDT11 | hsa-miR-4799-3p  |
| NUDT11 | hsa-miR-548ae-3p |
| NUDT11 | hsa-miR-7843-5p  |
| NUDT11 | hsa-miR-710      |
| NUDT11 | hsa-miR-5007-3p  |
| NUDT11 | hsa-miR-4690-3p  |
| NUDT11 | hsa-miR-6979-5p  |
| NUDT11 | hsa-miR-6731-3p  |
| NUDT11 | hsa-miR-5003-3p  |
| NUDT11 | hsa-miR-4433b-5p |
| NUDT11 | hsa-miR-532-5p   |
| NUDT11 | hsa-miR-8809     |
| NUDT11 | hsa-miR-5110     |
| NUDT11 | hsa-miR-30e-3p   |
| NUDT11 | hsa-miR-3926     |
| NUDT11 | hsa-miR-335-3p   |
| NUDT11 | hsa-miR-499      |
| NUDT11 | hsa-miR-23-5p    |
| NUDT11 | hsa-miR-345-3p   |
| NUDT11 | hsa-miR-7011-3p  |
| NUDT11 | hsa-miR-5187-5p  |



|        |                 |
|--------|-----------------|
| NUDT11 | hsa-miR-7117-3p |
| NUDT11 | hsa-miR-376c-3p |
| NUDT11 | hsa-miR-6867-5p |
| NUDT11 | hsa-miR-8075    |
| NUDT11 | hsa-miR-31-3p   |
| NUDT11 | hsa-miR-653-3p  |
| NUDT11 | hsa-miR-2681-3p |
| NUDT11 | hsa-miR-6721-5p |
| NUDT11 | hsa-miR-135-5p  |
| NUDT11 | hsa-miR-2052    |
| NUDT11 | hsa-miR-4766-5p |
| NUDT11 | hsa-miR-144-3p  |
| NUDT11 | hsa-miR-200a-5p |
| NUDT11 | hsa-miR-18-5p   |
| NUDT11 | hsa-miR-183-5p  |
| NUDT11 | hsa-miR-708-5p  |
| NUDT11 | hsa-miR-1255    |
| NUDT11 | hsa-miR-6783-5p |
| NUDT11 | hsa-miR-105b    |
| NUDT11 | hsa-miR-1468-3p |
| NUDT11 | hsa-miR-9500    |
| NUDT11 | hsa-miR-2339    |
| NUDT11 | hsa-miR-5009-3p |
| NUDT11 | hsa-miR-2483-3p |
| NUDT11 | hsa-miR-548j-3p |
| NUDT11 | hsa-miR-6906-5p |
| NUDT11 | hsa-miR-29c-3p  |
| NUDT11 | hsa-miR-8904a   |
| NUDT11 | hsa-miR-466f-3p |
| NUDT11 | hsa-miR-8795    |
| NUDT11 | hsa-miR-4677-5p |
| NUDT11 | hsa-miR-6378    |
| NUDT11 | hsa-miR-5692bc  |
| NUDT11 | hsa-miR-522-3p  |
| NUDT11 | hsa-miR-4652-5p |
| NUDT11 | hsa-miR-350     |
| NUDT11 | hsa-miR-6792-5p |
| NUDT11 | hsa-miR-6891-5p |
| NUDT11 | hsa-miR-153-5p  |
| NUDT11 | hsa-miR-8853    |
| NUDT11 | hsa-miR-3065-5p |
| NUDT11 | hsa-miR-203-5p  |
| NUDT11 | hsa-miR-181-3p  |
| NUDT11 | hsa-miR-200a-3p |
| NUDT11 | hsa-miR-545-3p  |
| NUDT11 | hsa-miR-5588-5p |

|        |                 |
|--------|-----------------|
| NUDT11 | hsa-miR-644a    |
| NUDT11 | hsa-miR-4667    |
| NUDT11 | hsa-miR-7084-3p |
| NUDT11 | hsa-miR-142-3p  |
| NUDT11 | hsa-miR-2284y   |
| NUDT11 | hsa-miR-3177-5p |
| NUDT11 | hsa-miR-495-3p  |
| NUDT11 | hsa-miR-4643    |
| NUDT11 | hsa-miR-1827    |
| NUDT11 | hsa-miR-2458    |
| NUDT11 | hsa-miR-4426    |
| NUDT11 | hsa-miR-7054-5p |
| NUDT11 | hsa-miR-1835    |
| NUDT11 | hsa-miR-4738-3p |
| NUDT11 | hsa-miR-642-3p  |
| NUDT11 | hsa-miR-5003-5p |
| NUDT11 | hsa-miR-6958-5p |
| NUDT11 | hsa-miR-7214-5p |
| NUDT11 | hsa-miR-4635    |
| NUDT11 | hsa-miR-6984-5p |
| NUDT11 | hsa-miR-4318    |
| NUDT11 | hsa-miR-382-5p  |
| NUDT11 | hsa-miR-4290    |
| NUDT11 | hsa-miR-2462    |
| NUDT11 | hsa-miR-7202-3p |
| NUDT11 | hsa-miR-557     |
| NUDT11 | hsa-miR-6739-3p |
| NUDT11 | hsa-miR-4799-5p |
| NUDT11 | hsa-miR-295-5p  |
| NUDT11 | hsa-miR-742-5p  |
| NUDT11 | hsa-miR-3173-3p |
| NUDT11 | hsa-miR-4293    |
| NUDT11 | hsa-miR-518-5p  |
| NUDT11 | hsa-miR-6877-3p |
| NUDT11 | hsa-miR-150-5p  |
| NUDT11 | hsa-miR-126a-5p |
| NUDT11 | hsa-miR-2483-5p |
| NUDT11 | hsa-miR-7198-3p |
| NUDT11 | hsa-miR-7037-3p |
| NUDT11 | hsa-miR-101c    |
| NUDT11 | hsa-miR-5697-3p |
| NUDT11 | hsa-miR-466l-3p |
| NUDT11 | hsa-miR-30-5p   |
| NUDT11 | hsa-miR-6949-3p |
| NUDT11 | hsa-miR-548aef  |
| NUDT11 | hsa-miR-206     |

|        |                      |
|--------|----------------------|
| NUDT11 | hsa-miR-494          |
| NUDT11 | hsa-miR-8893         |
| NUDT11 | hsa-miR-5706         |
| NUDT11 | hsa-miR-4774-5p      |
| NUDT11 | hsa-let-7a-3p        |
| NUDT11 | hsa-miR-30d-3p       |
| NUDT11 | hsa-miR-5190         |
| NUDT11 | hsa-miR-2284-5p      |
| NUDT11 | hsa-miR-6776-3p      |
| NUDT11 | hsa-miR-6948-3p      |
| NUDT11 | hsa-miR-599          |
| NUDT11 | hsa-miR-3074-3p      |
| NUDT11 | hsa-miR-4700-5p      |
| NUDT11 | hsa-miR-203-3p.2     |
| NUDT11 | hsa-let-7f-1-3p      |
| NUDT11 | hsa-miR-676-3p       |
| NUDT11 | hsa-miR-5571-5p      |
| NUDT11 | hsa-miR-3148         |
| NUDT11 | hsa-miR-2285af       |
| NUDT11 | hsa-miR-6929-5p      |
| NUDT11 | hsa-miR-7038-5p      |
| NUDT11 | hsa-miR-4667-5p      |
| NUDT11 | hsa-miR-216-3p       |
| NUDT11 | hsa-miR-1912-3p      |
| NUDT11 | hsa-miR-2681-5p      |
| NUDT11 | hsa-miR-2285z        |
| NUDT11 | hsa-miR-548bd-3p     |
| NUDT11 | hsa-miR-26a-5p       |
| NUDT11 | hsa-miR-199-5p       |
| NUDT11 | hsa-miR-101-3p       |
| NUDT11 | hsa-miR-7201-5p      |
| NUDT11 | hsa-miR-708-5p       |
| NUDT11 | hsa-miR-8821         |
| NUDT11 | hsa-miR-379-3p       |
| NUDT11 | hsa-miR-4307         |
| NUDT11 | hsa-miR-6781-3p      |
| NUDT11 | hsa-miR-384          |
| NUDT11 | hsa-miR-3102-5p.2-5p |
| NUDT11 | hsa-miR-3101-5p      |
| NUDT11 | hsa-miR-624-5p       |
| NUDT11 | hsa-miR-6856-3p      |
| NUDT11 | hsa-miR-4330         |
| NUDT11 | hsa-miR-3160-3p      |
| NUDT11 | hsa-miR-4496         |
| NUDT11 | hsa-miR-2284j        |
| NUDT11 | hsa-miR-27b-5p       |

|        |                   |
|--------|-------------------|
| NUDT11 | hsa-miR-182-5p    |
| NUDT11 | hsa-miR-3606-3p   |
| NUDT11 | hsa-miR-4291      |
| NUDT11 | hsa-miR-549a      |
| NUDT11 | hsa-miR-1297      |
| NUDT11 | hsa-miR-527       |
| NUDT11 | hsa-miR-6946-3p   |
| NUDT11 | hsa-miR-6908-3p   |
| NUDT11 | hsa-miR-140-3p.2  |
| NUDT11 | hsa-miR-144-3p    |
| NUDT11 | hsa-miR-6925-5p   |
| NUDT11 | hsa-miR-5094      |
| NUDT11 | hsa-miR-2682-3p   |
| NUDT11 | hsa-miR-493-5p    |
| NUDT11 | hsa-miR-669e-5p   |
| NUDT11 | hsa-miR-1198-5p   |
| NUDT11 | hsa-miR-640       |
| NUDT11 | hsa-miR-1283      |
| NUDT11 | hsa-miR-3202      |
| NUDT11 | hsa-miR-6509-3p   |
| NUDT11 | hsa-miR-516-3p    |
| NUDT11 | hsa-miR-186-5p    |
| NUDT11 | hsa-miR-548aq-3p  |
| NUDT11 | hsa-miR-377-3p    |
| NUDT11 | hsa-miR-7119-3p   |
| NUDT11 | hsa-miR-679-3p    |
| NUDT11 | hsa-miR-7023-3p   |
| NUDT11 | hsa-miR-21-3p     |
| NUDT11 | hsa-miR-7681-3p   |
| NUDT11 | hsa-miR-3617-5p   |
| NUDT11 | hsa-miR-454-5p    |
| NUDT11 | hsa-miR-3070-2-3p |
| NUDT11 | hsa-miR-4433a-5p  |
| NUDT11 | hsa-miR-2909      |
| NUDT11 | hsa-miR-2410      |
| NUDT11 | hsa-miR-8839      |
| NUDT11 | hsa-miR-344b-3p   |
| NUDT11 | hsa-miR-764-5p    |
| NUDT11 | hsa-miR-450a      |
| NUDT11 | hsa-miR-4762-3p   |
| NUDT11 | hsa-miR-4471      |
| NUDT11 | hsa-miR-3651      |
| NUDT11 | hsa-miR-126b-5p   |
| NUDT11 | hsa-miR-2285u     |
| NUDT11 | hsa-miR-6126      |
| NUDT11 | hsa-miR-6924-3p   |

|        |                  |
|--------|------------------|
| NUDT11 | hsa-miR-2459     |
| NUDT11 | hsa-miR-548b-3p  |
| NUDT11 | hsa-miR-1238-3p  |
| NUDT11 | hsa-miR-3100-3p  |
| NUDT11 | hsa-miR-8881     |
| NUDT11 | hsa-miR-598-5p   |
| NUDT11 | hsa-miR-5197-5p  |
| NUDT11 | hsa-miR-6511a-5p |
| NUDT11 | hsa-miR-5693     |
| NUDT11 | hsa-miR-3911     |
| NUDT11 | hsa-miR-646      |
| NUDT11 | hsa-miR-4309     |
| NUDT11 | hsa-miR-544-3p   |
| NUDT11 | hsa-miR-3657     |
| NUDT11 | hsa-miR-137      |
| NUDT11 | hsa-miR-124-5p   |
| NUDT11 | hsa-miR-513a-3p  |
| NUDT11 | hsa-miR-8485     |
| NUDT11 | hsa-miR-741-3p   |
| NUDT11 | hsa-miR-6981-5p  |
| NUDT11 | hsa-miR-127-5p   |
| NUDT11 | hsa-miR-942      |
| NUDT11 | hsa-miR-30-3p    |
| NUDT11 | hsa-miR-200      |
| NUDT11 | hsa-miR-7030-3p  |
| NUDT11 | hsa-miR-690      |
| NUDT11 | hsa-miR-29-3p    |
| NUDT11 | hsa-miR-8892     |
| NUDT11 | hsa-miR-7089-3p  |
| NUDT11 | hsa-miR-1273g-3p |
| NUDT11 | hsa-miR-4795-5p  |
| NUDT11 | hsa-miR-505-3p   |
| NUDT11 | hsa-miR-7075-3p  |
| NUDT11 | hsa-miR-3944-5p  |
| NUDT11 | hsa-miR-7027-5p  |
| NUDT11 | hsa-miR-2284a    |
| NUDT11 | hsa-miR-6079     |
| NUDT11 | hsa-miR-369-3p   |
| NUDT11 | hsa-miR-4723-3p  |
| NUDT11 | hsa-miR-2284i    |
| NUDT11 | hsa-miR-4533     |
| NUDT11 | hsa-miR-7180-5p  |
| NUDT11 | hsa-miR-4776-3p  |
| NUDT11 | hsa-miR-490-3p   |
| NUDT11 | hsa-miR-1245b-3p |
| NUDT11 | hsa-miR-6350     |

|        |                  |
|--------|------------------|
| NUDT11 | hsa-miR-518-3p   |
| NUDT11 | hsa-miR-380-3p   |
| NUDT11 | hsa-miR-7666-3p  |
| NUDT11 | hsa-miR-7110-3p  |
| NUDT11 | hsa-miR-452-3p   |
| NUDT11 | hsa-miR-6940-3p  |
| NUDT11 | hsa-miR-6858-5p  |
| NUDT11 | hsa-miR-15b-3p   |
| NUDT11 | hsa-miR-371a-5p  |
| NUDT11 | hsa-miR-26-5p    |
| NUDT11 | hsa-miR-4782-5p  |
| NUDT11 | hsa-miR-4724-5p  |
| NUDT11 | hsa-miR-3163     |
| NUDT11 | hsa-miR-548ah-3p |
| NUDT11 | hsa-miR-1245-3p  |
| NUDT11 | hsa-miR-7194-5p  |
| NUDT11 | hsa-miR-6122-3p  |
| NUDT11 | hsa-miR-98-3p    |
| NUDT11 | hsa-miR-6999-5p  |
| NUDT11 | hsa-miR-185-5p   |
| NUDT11 | hsa-miR-544-5p   |
| NUDT11 | hsa-miR-605-3p   |
| NUDT11 | hsa-miR-1256     |
| NUDT11 | hsa-miR-2352     |
| NUDT11 | hsa-miR-7211-5p  |
| NUDT11 | hsa-miR-1289     |
| NUDT11 | hsa-miR-4670-3p  |
| NUDT11 | hsa-miR-3124-3p  |
| NUDT11 | hsa-miR-4273     |
| NUDT11 | hsa-miR-7025-3p  |
| NUDT11 | hsa-miR-7000-5p  |
| NUDT11 | hsa-miR-4717-3p  |
| NUDT11 | hsa-let-7abf-3p  |
| NUDT11 | hsa-miR-532-5p   |
| NUDT11 | hsa-miR-497-5p   |
| NUDT11 | hsa-miR-7093-5p  |
| NUDT11 | hsa-miR-6983-3p  |
| NUDT11 | hsa-miR-2418     |
| NUDT11 | hsa-miR-302      |
| NUDT11 | hsa-miR-6934-3p  |
| NUDT11 | hsa-miR-2285j    |
| NUDT11 | hsa-miR-1292-5p  |
| NUDT11 | hsa-miR-8885     |
| NUDT11 | hsa-miR-7238-3p  |
| NUDT11 | hsa-miR-373-3p   |
| NUDT11 | hsa-miR-5619-3p  |

|        |                   |
|--------|-------------------|
| NUDT11 | hsa-miR-677-5p    |
| NUDT11 | hsa-miR-4659b-3p  |
| NUDT11 | hsa-miR-486-5p    |
| NUDT11 | hsa-miR-508a      |
| NUDT11 | hsa-miR-3167-5p   |
| NUDT11 | hsa-miR-3074-2-3p |
| NUDT11 | hsa-miR-5011-5p   |
| NUDT11 | hsa-miR-2387      |
| NUDT11 | hsa-miR-628-3p    |
| NUDT11 | hsa-miR-551b-5p   |
| NUDT11 | hsa-miR-7848-3p   |
| NUDT11 | hsa-miR-9769-5p   |
| NUDT11 | hsa-miR-194-5p    |
| NUDT11 | hsa-miR-3145-3p   |
| NUDT11 | hsa-miR-7063-3p   |
| NUDT11 | hsa-miR-540-5p    |
| NUDT11 | hsa-miR-3662      |
| NUDT11 | hsa-miR-1255a     |
| NUDT11 | hsa-miR-539-5p    |
| NUDT11 | hsa-miR-4470      |
| NUDT11 | hsa-miR-589-5p    |
| NUDT11 | hsa-miR-7227-3p   |
| NUDT11 | hsa-miR-6920-5p   |
| NUDT11 | hsa-miR-548ar-3p  |
| NUDT11 | hsa-miR-3198      |
| NUDT11 | hsa-miR-98-5p     |
| NUDT11 | hsa-miR-142       |
| NUDT11 | hsa-miR-3144-5p   |
| NUDT11 | hsa-miR-518a-5p   |
| NUDT11 | hsa-miR-8818      |
| NUDT11 | hsa-miR-6758-5p   |
| NUDT11 | hsa-miR-743ab-3p  |
| NUDT11 | hsa-miR-6875-3p   |
| NUDT11 | hsa-miR-5585-3p   |
| NUDT11 | hsa-miR-764       |
| NUDT11 | hsa-miR-374       |
| NUDT11 | hsa-miR-6898-3p   |
| NUDT11 | hsa-miR-627-5p    |
| NUDT11 | hsa-miR-6077      |
| NUDT11 | hsa-miR-1241      |
| NUDT11 | hsa-miR-6944-3p   |
| NUDT11 | hsa-miR-32-3p     |
| NUDT11 | hsa-miR-653       |
| NUDT11 | hsa-miR-1839      |
| NUDT11 | hsa-miR-7234-3p   |
| NUDT11 | hsa-miR-323a-3p   |

|        |                  |
|--------|------------------|
| NUDT11 | hsa-miR-3646     |
| NUDT11 | hsa-miR-130b-5p  |
| NUDT11 | hsa-miR-3071-3p  |
| NUDT11 | hsa-miR-4536-5p  |
| NUDT11 | hsa-miR-6871-3p  |
| NUDT11 | hsa-miR-934-3p   |
| NUDT11 | hsa-miR-302f     |
| NUDT11 | hsa-miR-6975-3p  |
| NUDT11 | hsa-miR-650abc   |
| NUDT11 | hsa-miR-3654     |
| NUDT11 | hsa-miR-2358     |
| NUDT11 | hsa-miR-381-3p   |
| NUDT11 | hsa-miR-2333     |
| NUDT11 | hsa-miR-6371     |
| NUDT11 | hsa-miR-16-1-3p  |
| NUDT11 | hsa-miR-4493     |
| NUDT11 | hsa-miR-8825     |
| NUDT11 | hsa-miR-641      |
| NUDT11 | hsa-miR-873-3p   |
| NUDT11 | hsa-miR-4796-5p  |
| NUDT11 | hsa-miR-374-5p   |
| NUDT11 | hsa-miR-4740-5p  |
| NUDT11 | hsa-miR-17       |
| NUDT11 | hsa-miR-3660     |
| NUDT11 | hsa-miR-302bd    |
| NUDT11 | hsa-miR-138-3p   |
| NUDT11 | hsa-miR-2290     |
| NUDT11 | hsa-miR-1250-3p  |
| NUDT11 | hsa-miR-518      |
| NUDT11 | hsa-miR-302a-5p  |
| NUDT11 | hsa-miR-1277-5p  |
| NUDT11 | hsa-miR-597-5p   |
| NUDT11 | hsa-miR-545-3p   |
| NUDT11 | hsa-miR-19-5p    |
| NUDT11 | hsa-miR-1296-5p  |
| NUDT11 | hsa-miR-7156-5p  |
| NUDT11 | hsa-miR-20-3p    |
| NUDT11 | hsa-miR-7166-3p  |
| NUDT11 | hsa-miR-516b     |
| NUDT11 | hsa-miR-6960-3p  |
| NUDT11 | hsa-miR-6346     |
| NUDT11 | hsa-miR-200ab-5p |
| NUDT11 | hsa-miR-365-5p   |
| NUDT11 | hsa-miR-7163-3p  |
| NUDT11 | hsa-miR-372-5p   |
| NUDT11 | hsa-miR-292b-5p  |



|        |                  |
|--------|------------------|
| NUDT11 | hsa-miR-7151-5p  |
| NUDT11 | hsa-miR-371b-5p  |
| NUDT11 | hsa-miR-489      |
| NUDT11 | hsa-miR-883b-5p  |
| NUDT11 | hsa-miR-7844-5p  |
| NUDT11 | hsa-miR-463-3p   |
| NUDT11 | hsa-miR-6716-5p  |
| NUDT11 | hsa-miR-7081-5p  |
| NUDT11 | hsa-miR-4742-3p  |
| NUDT11 | hsa-miR-760      |
| NUDT11 | hsa-miR-6899-3p  |
| NUDT11 | hsa-miR-8118     |
| NUDT11 | hsa-miR-548c-3p  |
| NUDT11 | hsa-miR-4778-3p  |
| NUDT11 | hsa-miR-378b     |
| NUDT11 | hsa-miR-873-5p.2 |
| NUDT11 | hsa-miR-6124     |
| NUDT11 | hsa-miR-371      |
| NUDT11 | hsa-miR-6922-3p  |
| NUDT11 | hsa-miR-6418-3p  |
| NUDT11 | hsa-miR-6507-5p  |
| NUDT11 | hsa-miR-1265     |
| NUDT11 | hsa-miR-3682-5p  |
| NUDT11 | hsa-miR-561-3p   |
| NUDT11 | hsa-miR-329-3p   |
| NUDT11 | hsa-miR-1178-3p  |
| NUDT11 | hsa-miR-7013-5p  |
| NUDT11 | hsa-miR-2285r    |
| NUDT11 | hsa-miR-4684-5p  |
| NUDT11 | hsa-miR-4276     |
| NUDT11 | hsa-miR-2370-3p  |
| NUDT11 | hsa-miR-2400     |
| NUDT11 | hsa-miR-570-3p   |
| NUDT11 | hsa-miR-466i-3p  |
| NUDT11 | hsa-miR-6416-3p  |
| NUDT11 | hsa-miR-874-3p   |
| NUDT11 | hsa-miR-375      |
| NUDT11 | hsa-miR-3544-5p  |
| NUDT11 | hsa-miR-600      |
| NUDT11 | hsa-miR-217      |
| NUDT11 | hsa-miR-3138     |
| NUDT11 | hsa-miR-4803     |
| NUDT11 | hsa-miR-6357     |
| NUDT11 | hsa-miR-2326     |
| NUDT11 | hsa-miR-350-3p   |
| NUDT11 | hsa-let-7-5p     |

|        |                   |
|--------|-------------------|
| NUDT11 | hsa-miR-330-3p.2  |
| NUDT11 | hsa-miR-6929-3p   |
| NUDT11 | hsa-miR-7208-3p   |
| NUDT11 | hsa-miR-122       |
| NUDT11 | hsa-miR-3103-3p   |
| NUDT11 | hsa-miR-6540-3p   |
| NUDT11 | hsa-miR-470-5p    |
| NUDT11 | hsa-miR-6913-3p   |
| NUDT11 | hsa-miR-4704-5p   |
| NUDT11 | hsa-miR-7243-3p   |
| NUDT11 | hsa-miR-203-3p.1  |
| NUDT11 | hsa-miR-1-3p      |
| NUDT11 | hsa-miR-7018-3p   |
| NUDT11 | hsa-miR-3099-5p   |
| NUDT11 | hsa-miR-200-3p    |
| NUDT11 | hsa-miR-6887-3p   |
| NUDT11 | hsa-miR-199-3p    |
| NUDT11 | hsa-miR-548aw     |
| NUDT11 | hsa-miR-496a-3p.2 |
| NUDT11 | hsa-miR-655-3p    |
| NUDT11 | hsa-miR-6945-3p   |
| NUDT11 | hsa-miR-520f-5p   |
| NUDT11 | hsa-miR-218-5p    |
| NUDT11 | hsa-miR-6787-3p   |
| NUDT11 | hsa-miR-5680      |
| NUDT11 | hsa-miR-2893      |
| NUDT11 | hsa-miR-466n-5p   |
| NUDT11 | hsa-miR-409       |
| NUDT11 | hsa-miR-450a-5p   |
| NUDT11 | hsa-let-7-3p      |
| NUDT11 | hsa-miR-5196-5p   |
| NUDT11 | hsa-miR-627-3p    |
| NUDT11 | hsa-miR-373-3p    |
| NUDT11 | hsa-miR-548bb-3p  |
| NUDT11 | hsa-miR-2284g     |
| NUDT11 | hsa-miR-3928-3p   |
| NUDT11 | hsa-miR-695       |
| NUDT11 | hsa-miR-3135a     |
| NUDT11 | hsa-miR-550a-3p   |
| NUDT11 | hsa-miR-6514-5p   |
| NUDT11 | hsa-miR-670-3p    |
| NUDT11 | hsa-miR-672-3p    |
| NUDT11 | hsa-miR-4495      |
| NUDT11 | hsa-miR-194-3p    |
| NUDT11 | hsa-miR-3915      |
| NUDT11 | hsa-miR-2368-3p   |

|        |                   |
|--------|-------------------|
| NUDT11 | hsa-miR-212-3p    |
| NUDT11 | hsa-miR-5702      |
| NUDT11 | hsa-miR-377-3p    |
| NUDT11 | hsa-miR-95-5p     |
| NUDT11 | hsa-miR-520       |
| NUDT11 | hsa-miR-1982-5p   |
| NUDT11 | hsa-miR-4436b-5p  |
| NUDT11 | hsa-miR-3976      |
| NUDT11 | hsa-miR-6902-5p   |
| NUDT11 | hsa-miR-494-3p    |
| NUDT11 | hsa-miR-7843-3p   |
| NUDT11 | hsa-miR-411-3p    |
| NUDT11 | hsa-miR-7849-3p   |
| NUDT11 | hsa-miR-29        |
| NUDT11 | hsa-miR-380       |
| NUDT11 | hsa-miR-6757-5p   |
| NUDT11 | hsa-miR-3123      |
| NUDT11 | hsa-miR-548l      |
| NUDT11 | hsa-miR-190a-3p   |
| NUDT11 | hsa-miR-2425-5p   |
| NUDT11 | hsa-miR-4687-5p   |
| NUDT11 | hsa-miR-635       |
| NUDT11 | hsa-miR-6774-5p   |
| NUDT11 | hsa-miR-4731-3p   |
| NUDT11 | hsa-miR-5010-3p   |
| NUDT11 | hsa-miR-7646-3p   |
| NUDT11 | hsa-miR-558       |
| NUDT11 | hsa-miR-5007-5p   |
| NUDT11 | hsa-miR-125b-2-3p |
| NUDT11 | hsa-miR-8831      |
| NUDT11 | hsa-miR-93-3p     |
| NUDT11 | hsa-miR-143-3p    |
| NUDT11 | hsa-miR-216b      |
| NUDT11 | hsa-miR-642b-5p   |
| NUDT11 | hsa-miR-489-3p    |
| NUDT11 | hsa-miR-6481      |
| NUDT11 | hsa-miR-6525      |
| NUDT11 | hsa-miR-2284b     |
| NUDT11 | hsa-miR-513c-3p   |
| NUDT11 | hsa-miR-26b-5p    |
| NUDT11 | hsa-miR-3133      |
| NUDT11 | hsa-miR-693-5p    |
| NUDT11 | hsa-miR-26-3p     |
| NUDT11 | hsa-miR-3612      |
| NUDT11 | hsa-miR-326       |
| NUDT11 | hsa-miR-7188-3p   |

|        |                   |
|--------|-------------------|
| NUDT11 | hsa-miR-553       |
| NUDT11 | hsa-miR-383-3p    |
| NUDT11 | hsa-miR-4766-3p   |
| NUDT11 | hsa-miR-3613-3p   |
| NUDT11 | hsa-miR-7192-5p   |
| NUDT11 | hsa-miR-200c-5p   |
| NUDT11 | hsa-miR-495-3p    |
| NUDT11 | hsa-miR-6961-3p   |
| NUDT11 | hsa-miR-548e-3p   |
| NUDT11 | hsa-miR-802       |
| NUDT11 | hsa-miR-4443      |
| NUDT11 | hsa-miR-676-3p    |
| NUDT11 | hsa-miR-4524-5p   |
| NUDT11 | hsa-miR-149-3p    |
| NUDT11 | hsa-miR-200c-3p   |
| NUDT11 | hsa-miR-296-5p    |
| NUDT11 | hsa-miR-466aep-5p |
| NUDT11 | hsa-miR-759       |
| NUDT11 | hsa-miR-516b-5p   |
| NUDT11 | hsa-miR-4420      |
| NUDT11 | hsa-miR-6927-3p   |
| NUDT11 | hsa-miR-7164-5p   |
| NUDT11 | hsa-miR-2322-3p   |
| NUDT11 | hsa-miR-3087-3p   |
| NUDT11 | hsa-miR-568       |
| NUDT11 | hsa-miR-382-3p    |
| NUDT11 | hsa-miR-23a-5p    |
| NUDT11 | hsa-miR-208-5p    |
| NUDT11 | hsa-miR-3913-3p   |
| NUDT11 | hsa-miR-294-5p    |
| NUDT11 | hsa-miR-6360      |
| NUDT11 | hsa-miR-6835-3p   |
| NUDT11 | hsa-miR-6881-3p   |
| NUDT11 | hsa-miR-181b-3p   |
| NUDT11 | hsa-miR-2284d     |
| NUDT11 | hsa-miR-3470b     |
| NUDT11 | hsa-miR-7061-5p   |
| NUDT11 | hsa-miR-292a-5p   |
| NUDT11 | hsa-miR-6876-3p   |
| NUDT11 | hsa-miR-6516      |
| NUDT11 | hsa-miR-3653-3p   |
| NUDT11 | hsa-miR-3063-3p   |
| NUDT11 | hsa-miR-1286      |
| NUDT11 | hsa-miR-3671      |
| NUDT11 | hsa-miR-142-5p    |
| NUDT11 | hsa-miR-384-5p    |

|        |                  |
|--------|------------------|
| NUDT11 | hsa-miR-129-5p   |
| NUDT11 | hsa-miR-6946-5p  |
| NUDT11 | hsa-miR-567      |
| NUDT11 | hsa-miR-503-5p   |
| NUDT11 | hsa-miR-4261     |
| NUDT11 | hsa-miR-548h-3p  |
| NUDT11 | hsa-miR-7706     |
| NUDT11 | hsa-miR-486-5p   |
| NUDT11 | hsa-miR-466l-5p  |
| NUDT11 | hsa-miR-7044-5p  |
| NUDT11 | hsa-miR-616-5p   |
| NUDT11 | hsa-miR-548ac    |
| NUDT11 | hsa-miR-4689     |
| NUDT11 | hsa-miR-3070-3p  |
| NUDT11 | hsa-miR-1949     |
| NUDT11 | hsa-miR-6398     |
| NUDT11 | hsa-miR-4715-3p  |
| NUDT11 | hsa-miR-669bf-3p |
| NUDT11 | hsa-miR-7675-3p  |
| NUDT11 | hsa-miR-613      |
| NUDT11 | hsa-miR-505-5p   |
| NUDT11 | hsa-miR-4632-5p  |
| NUDT11 | hsa-miR-7661-5p  |
| NUDT11 | hsa-miR-519-3p   |
| NUDT11 | hsa-miR-1388-3p  |
| NUDT11 | hsa-miR-1178-3p  |
| NUDT11 | hsa-miR-874      |
| NUDT11 | hsa-miR-26b-3p   |
| NUDT11 | hsa-miR-8104     |
| NUDT11 | hsa-miR-888-5p   |
| NUDT11 | hsa-miR-5096     |
| NUDT11 | hsa-miR-337-5p   |
| NUDT11 | hsa-miR-633      |
| NUDT11 | hsa-miR-6957-5p  |
| NUDT11 | hsa-miR-9-5p     |
| NUDT11 | hsa-miR-677      |
| NUDT11 | hsa-miR-2392     |
| NUDT11 | hsa-miR-2457     |
| NUDT11 | hsa-miR-7654-3p  |
| NUDT11 | hsa-miR-4709-5p  |
| NUDT11 | hsa-miR-143-5p   |
| NUDT11 | hsa-miR-1252-3p  |
| NUDT11 | hsa-miR-942-5p   |
| NUDT11 | hsa-miR-7021-3p  |
| NUDT11 | hsa-miR-141-3p   |
| NUDT11 | hsa-miR-3714     |

|        |                    |
|--------|--------------------|
| NUDT11 | hsa-miR-1255b-2-3p |
| NUDT11 | hsa-miR-8854       |
| NUDT11 | hsa-miR-2896       |
| NUDT11 | hsa-miR-3068-5p    |
| NUDT11 | hsa-miR-3607-3p    |
| NUDT11 | hsa-miR-4697-3p    |
| NUDT11 | hsa-miR-16-5p      |
| NUDT11 | hsa-miR-487a       |
| NUDT11 | hsa-miR-4311       |
| NUDT11 | hsa-miR-707        |
| NUDT11 | hsa-miR-5189-3p    |
| NUDT11 | hsa-miR-7865       |
| NUDT11 | hsa-miR-7178-5p    |
| NUDT11 | hsa-miR-3154       |
| NUDT11 | hsa-miR-3179       |
| NUDT11 | hsa-miR-3978       |
| NUDT11 | hsa-miR-6826-3p    |
| NUDT11 | hsa-miR-500-5p     |
| NUDT11 | hsa-miR-5690       |
| NUDT11 | hsa-miR-29a-3p     |
| NUDT11 | hsa-miR-4428       |
| NUDT11 | hsa-miR-524-5p     |
| NUDT11 | hsa-miR-692        |
| NUDT11 | hsa-miR-548n       |
| NUDT11 | hsa-miR-4761-3p    |
| NUDT11 | hsa-miR-3622b-3p   |
| NUDT11 | hsa-miR-8814       |
| NUDT11 | hsa-miR-6798-3p    |
| NUDT11 | hsa-miR-6844       |
| NUDT11 | hsa-miR-130a-5p    |
| NUDT11 | hsa-miR-3191-3p    |
| NUDT11 | hsa-miR-1931       |
| NUDT11 | hsa-miR-216a       |
| NUDT11 | hsa-miR-7183-3p    |
| NUDT11 | hsa-miR-6782-3p    |
| NUDT11 | hsa-miR-653-5p     |
| NUDT11 | hsa-miR-450a-1-3p  |
| NUDT11 | hsa-miR-291-5p     |
| NUDT11 | hsa-miR-3964       |
| NUDT11 | hsa-miR-2284x      |
| NUDT11 | hsa-miR-7007-5p    |
| NUDT11 | hsa-miR-2415-5p    |
| NUDT11 | hsa-miR-4795-3p    |
| NUDT11 | hsa-miR-548b-3p    |
| NUDT11 | hsa-miR-222-5p     |
| NUDT11 | hsa-miR-205-5p     |

|        |                  |
|--------|------------------|
| NUDT11 | hsa-miR-216b-3p  |
| NUDT11 | hsa-miR-2284v    |
| NUDT11 | hsa-miR-4666a-3p |
| NUDT11 | hsa-miR-302a-3p  |
| NUDT11 | hsa-miR-23       |
| NUDT11 | hsa-miR-30a-3p   |
| NUDT11 | hsa-miR-3062-3p  |
| NUDT11 | hsa-miR-203      |
| NUDT11 | hsa-miR-6769b-3p |
| NUDT11 | hsa-miR-4305     |
| NUDT11 | hsa-miR-433-5p   |
| NUDT11 | hsa-miR-548s     |
| NUDT11 | hsa-miR-142-3p.1 |
| NUDT11 | hsa-miR-7668-5p  |
| NUDT11 | hsa-miR-520-3p   |
| NUDT11 | hsa-miR-548aj-5p |
| NUDT11 | hsa-miR-4642     |
| NUDT11 | hsa-miR-6973a-3p |
| NUDT11 | hsa-miR-429      |
| NUDT11 | hsa-miR-344f-5p  |
| NUDT11 | hsa-miR-497-5p   |
| NUDT11 | hsa-miR-3183     |
| NUDT11 | hsa-miR-6819-3p  |
| NUDT11 | hsa-miR-2284c    |
| NUDT11 | hsa-miR-2364     |
| NUDT11 | hsa-miR-548a-3p  |
| NUDT11 | hsa-miR-577-3p   |
| NUDT11 | hsa-miR-2311     |
| NUDT11 | hsa-miR-6884-3p  |
| NUDT11 | hsa-miR-4633-3p  |
| NUDT11 | hsa-miR-2285b    |
| NUDT11 | hsa-miR-3169     |
| NUDT11 | hsa-miR-1299     |
| NUDT11 | hsa-miR-498      |
| NUDT11 | hsa-miR-2285x    |
| NUDT11 | hsa-miR-101-3p.2 |
| NUDT11 | hsa-miR-4445-3p  |
| NUDT11 | hsa-miR-2284u    |
| NUDT11 | hsa-miR-582-5p   |
| NUDT11 | hsa-miR-6740-3p  |
| NUDT11 | hsa-miR-6899-5p  |
| NUDT11 | hsa-miR-7163-5p  |
| NUDT11 | hsa-miR-7215-3p  |
| NUDT11 | hsa-miR-5618-3p  |
| NUDT11 | hsa-miR-892-3p   |
| NUDT11 | hsa-miR-212-3p   |

|        |                   |
|--------|-------------------|
| NUDT11 | hsa-miR-323-3p    |
| NUDT11 | hsa-miR-2398      |
| NUDT11 | hsa-miR-5682      |
| NUDT11 | hsa-miR-574-3p    |
| NUDT11 | hsa-miR-875-3p    |
| NUDT11 | hsa-miR-1842      |
| NUDT11 | hsa-miR-3686      |
| NUDT11 | hsa-miR-15-5p     |
| NUDT11 | hsa-miR-3473g     |
| NUDT11 | hsa-miR-6995-5p   |
| NUDT11 | hsa-miR-6119-5p   |
| NUDT11 | hsa-miR-373-5p    |
| NUDT11 | hsa-miR-369-3p    |
| NUDT11 | hsa-miR-1255b-5p  |
| NUDT11 | hsa-miR-8059      |
| NUDT11 | hsa-miR-2284k     |
| NUDT11 | hsa-miR-579       |
| NUDT11 | hsa-miR-1243      |
| NUDT11 | hsa-miR-5691      |
| NUDT11 | hsa-miR-6985-5p   |
| NUDT11 | hsa-miR-6814-5p   |
| NUDT11 | hsa-miR-7676-3p   |
| NUDT11 | hsa-miR-2471-5p   |
| NUDT11 | hsa-miR-3074-1-3p |
| NUDT11 | hsa-miR-3064-3p   |
| NUDT11 | hsa-miR-2284ab    |
| NUDT11 | hsa-miR-300       |
| NUDT11 | hsa-miR-548x-5p   |
| NUDT11 | hsa-miR-372-3p    |
| NUDT11 | hsa-miR-3925-5p   |
| NUDT11 | hsa-miR-6925-3p   |
| NUDT11 | hsa-miR-101-3p.1  |
| NUDT11 | hsa-miR-96-3p     |
| NUDT11 | hsa-miR-549-3p    |
| NUDT11 | hsa-miR-6837-3p   |
| NUDT11 | hsa-miR-6735-5p   |
| NUDT11 | hsa-miR-548av-3p  |
| NUDT11 | hsa-miR-6951-3p   |
| NUDT11 | hsa-miR-3685      |
| NUDT11 | hsa-miR-3924      |
| NUDT11 | hsa-miR-1958      |
| NUDT11 | hsa-miR-374c-5p   |
| NUDT11 | hsa-miR-20a-3p    |
| NUDT11 | hsa-miR-7086-3p   |
| NUDT11 | hsa-miR-4720-5p   |
| NUDT11 | hsa-miR-207       |



|        |                  |
|--------|------------------|
| NUDT11 | hsa-miR-509-5p   |
| NUDT11 | hsa-miR-551-5p   |
| NUDT11 | hsa-miR-8843     |
| NUDT11 | hsa-miR-338-3p   |
| NUDT11 | hsa-miR-302-3p   |
| NUDT11 | hsa-miR-570-3p   |
| NUDT11 | hsa-miR-7206-3p  |
| NUDT11 | hsa-miR-421-3p   |
| NUDT11 | hsa-miR-1-3p     |
| NUDT11 | hsa-miR-340-5p   |
| NUDT11 | hsa-miR-548f-5p  |
| NUDT11 | hsa-miR-548f-3p  |
| NUDT11 | hsa-miR-3071-5p  |
| NUDT11 | hsa-miR-194-5p   |
| NUDT11 | hsa-miR-410      |
| NUDT11 | hsa-miR-2404     |
| NUDT11 | hsa-miR-122-5p   |
| NUDT11 | hsa-miR-6810-5p  |
| NUDT11 | hsa-miR-433      |
| NUDT11 | hsa-miR-671-5p   |
| NUDT11 | hsa-miR-1249-5p  |
| NUDT11 | hsa-miR-6973b-3p |
| NUDT11 | hsa-miR-2284n    |
| NUDT11 | hsa-miR-4801     |
| NUDT11 | hsa-miR-3102-3p  |
| NUDT11 | hsa-miR-8807     |
| NUDT11 | hsa-miR-451b     |
| NUDT11 | hsa-miR-382-5p   |
| NUDT11 | hsa-miR-1292-5p  |
| NUDT11 | hsa-miR-4657     |
| NUDT11 | hsa-miR-290a-5p  |
| NUDT11 | hsa-miR-200a-3p  |
| NUDT11 | hsa-miR-6964-3p  |
| NUDT11 | hsa-miR-7660-3p  |
| NUDT11 | hsa-miR-7663-3p  |
| NUDT11 | hsa-miR-140-3p   |
| NUDT11 | hsa-miR-7010-5p  |
| NUDT11 | hsa-miR-502b     |
| NUDT11 | hsa-miR-7233-5p  |
| NUDT11 | hsa-miR-542-3p   |
| NUDT11 | hsa-miR-3089-5p  |
| NUDT11 | hsa-miR-361-5p   |
| NUDT11 | hsa-miR-5697     |
| NUDT11 | hsa-miR-2421     |
| NUDT11 | hsa-miR-146-5p   |
| NUDT11 | hsa-miR-6994-5p  |

|        |                  |
|--------|------------------|
| NUDT11 | hsa-miR-125-5p   |
| NUDT11 | hsa-miR-6989-5p  |
| NUDT11 | hsa-miR-5108     |
| NUDT11 | hsa-miR-327      |
| NUDT11 | hsa-miR-5624-5p  |
| NUDT11 | hsa-miR-2284l    |
| NUDT11 | hsa-miR-298-5p   |
| NUDT11 | hsa-miR-3529-3p  |
| NUDT11 | hsa-miR-298      |
| NUDT11 | hsa-miR-4436b-3p |
| NUDT11 | hsa-miR-4661-5p  |
| NUDT11 | hsa-miR-2446     |
| NUDT11 | hsa-miR-522-3p   |
| NUDT11 | hsa-miR-548g-5p  |
| NUDT11 | hsa-miR-5582-3p  |
| NUDT11 | hsa-miR-431-5p   |
| NUDT11 | hsa-miR-140-5p   |
| NUDT11 | hsa-miR-655      |
| NUDT11 | hsa-miR-4282     |
| NUDT11 | hsa-miR-183-3p   |
| NUDT11 | hsa-miR-101-3p   |
| NUDT11 | hsa-miR-28-5p    |
| NUDT11 | hsa-miR-548az-3p |
| NUDT11 | hsa-miR-3688-3p  |
| NUDT11 | hsa-miR-1434-5p  |
| NUDT11 | hsa-miR-105-5p   |
| NUDT11 | hsa-miR-548am-3p |
| NUDT11 | hsa-miR-2480     |
| NUDT11 | hsa-miR-4650     |
| NUDT11 | hsa-miR-432-5p   |
| NUDT11 | hsa-miR-4503     |
| NUDT11 | hsa-miR-4747-5p  |
| NUDT11 | hsa-miR-16-3p    |
| NUDT11 | hsa-miR-7215-5p  |
| NUDT11 | hsa-miR-4659a-3p |
| NUDT11 | hsa-miR-4487     |
| NUDT11 | hsa-miR-548aj-3p |
| NUDT11 | hsa-miR-5121     |
| NUDT11 | hsa-miR-449b-3p  |
| NUDT11 | hsa-miR-8836     |
| NUDT11 | hsa-miR-548c-3p  |
| NUDT11 | hsa-miR-23-3p    |
| NUDT11 | hsa-miR-450-5p   |
| NUDT11 | hsa-miR-4536-5p  |
| NUDT11 | hsa-miR-6500-5p  |
| NUDT11 | hsa-miR-4647     |

|        |                   |
|--------|-------------------|
| NUDT11 | hsa-miR-8057      |
| NUDT11 | hsa-miR-1185-5p   |
| NUDT11 | hsa-miR-129-5p    |
| NUDT11 | hsa-miR-5687      |
| NUDT11 | hsa-miR-3909      |
| NUDT11 | hsa-miR-576-5p    |
| NUDT11 | hsa-miR-2276-5p   |
| NUDT11 | hsa-miR-381-3p    |
| NUDT11 | hsa-miR-6919-3p   |
| NUDT11 | hsa-miR-1910-3p   |
| NUDT11 | hsa-miR-195-5p    |
| NUDT11 | hsa-miR-6750-3p   |
| NUDT11 | hsa-miR-7169-5p   |
| NUDT11 | hsa-miR-7116-3p   |
| NUDT11 | hsa-miR-1247-3p   |
| NUDT11 | hsa-miR-7217-3p   |
| NUDT11 | hsa-miR-4694-3p   |
| NUDT11 | hsa-miR-6765-3p   |
| NUDT11 | hsa-miR-1912-5p   |
| NUDT11 | hsa-miR-147a      |
| NUDT11 | hsa-miR-7192-3p   |
| NUDT11 | hsa-miR-6868-5p   |
| NUDT11 | hsa-miR-139-5p    |
| NUDT11 | hsa-miR-2355-3p   |
| NUDT11 | hsa-miR-3655      |
| NUDT11 | hsa-miR-374b-5p   |
| NUDT11 | hsa-miR-1904      |
| NUDT11 | hsa-let-7b-3p     |
| NUDT11 | hsa-miR-505-3p.2  |
| NUDT11 | hsa-miR-2429      |
| NUDT11 | hsa-miR-372       |
| NUDT11 | hsa-miR-424-5p    |
| NUDT11 | hsa-miR-3075-3p   |
| NUDT11 | hsa-miR-626       |
| NUDT11 | hsa-miR-362-3p    |
| NUDT11 | hsa-miR-181a-2-3p |
| NUDT11 | hsa-miR-6384      |
| NUDT11 | hsa-miR-2284m     |
| NUDT11 | hsa-miR-455-5p    |
| NUDT11 | hsa-miR-450b-5p   |
| NUDT11 | hsa-miR-548x-3p   |
| NUDT11 | hsa-miR-1283a     |
| NUDT11 | hsa-miR-3569-3p   |
| NUDT11 | hsa-miR-1843      |
| NUDT11 | hsa-miR-667-5p    |
| NUDT11 | hsa-miR-449a      |

|        |                  |
|--------|------------------|
| NUDT11 | hsa-miR-6795-3p  |
| NUDT11 | hsa-miR-6827-5p  |
| NUDT11 | hsa-miR-6856-5p  |
| NUDT11 | hsa-miR-6356     |
| NUDT11 | hsa-miR-877-3p   |
| NUDT11 | hsa-miR-4724-3p  |
| NUDT11 | hsa-miR-2482     |
| NUDT11 | hsa-miR-28-3p    |
| NUDT11 | hsa-miR-516      |
| NUDT11 | hsa-miR-6403     |
| NUDT11 | hsa-miR-548z     |
| NUDT11 | hsa-miR-7074-3p  |
| NUDT11 | hsa-miR-590-3p   |
| NUDT11 | hsa-miR-607      |
| NUDT11 | hsa-miR-2330-3p  |
| NUDT11 | hsa-miR-4722-5p  |
| NUDT11 | hsa-miR-4433b-3p |
| NUDT11 | hsa-miR-7219-5p  |
| NUDT11 | hsa-miR-7024-3p  |
| NUDT11 | hsa-miR-425      |
| NUDT11 | hsa-miR-144-5p   |
| NUDT11 | hsa-miR-6345     |
| NUDT11 | hsa-miR-2437     |
| NUDT11 | hsa-miR-28-5p    |
| NUDT16 | hsa-miR-654-5p   |
| NUDT16 | hsa-miR-541-5p   |
| NUDT16 | hsa-miR-2116-3p  |
| NUDT16 | hsa-miR-148b-5p  |
| NUDT16 | hsa-miR-7040-3p  |
| NUDT16 | hsa-miR-883-3p   |
| NUDT16 | hsa-miR-205-3p   |
| NUDT16 | hsa-miR-105-5p   |
| NUDT16 | hsa-miR-4752     |
| NUDT16 | hsa-miR-3152-5p  |
| NUDT16 | hsa-miR-889-3p   |
| NUDT16 | hsa-miR-6766-5p  |
| NUDT16 | hsa-miR-3474     |
| NUDT16 | hsa-miR-7116-5p  |
| NUDT16 | hsa-miR-7202-5p  |
| NUDT16 | hsa-miR-6986-5p  |
| NUDT16 | hsa-miR-6943-3p  |
| NUDT16 | hsa-miR-203a-5p  |
| NUDT16 | hsa-miR-1305     |
| NUDT16 | hsa-miR-7009-3p  |
| NUDT16 | hsa-miR-6807-5p  |
| NUDT16 | hsa-miR-4452     |

|        |                  |
|--------|------------------|
| NUDT16 | hsa-miR-212-3p   |
| NUDT16 | hsa-miR-6742-3p  |
| NUDT16 | hsa-miR-1839-5p  |
| NUDT16 | hsa-miR-383-5p.2 |
| NUDT16 | hsa-miR-4286     |
| NUDT16 | hsa-miR-1283     |
| NUDT16 | hsa-miR-8908-5p  |
| NUDT16 | hsa-miR-596      |
| NUDT16 | hsa-miR-346-3p   |
| NUDT16 | hsa-miR-517      |
| NUDT16 | hsa-miR-31-5p    |
| NUDT16 | hsa-miR-4738-3p  |
| NUDT16 | hsa-miR-3173-3p  |
| NUDT16 | hsa-miR-6958-5p  |
| NUDT16 | hsa-miR-215-5p   |
| NUDT16 | hsa-miR-181b-3p  |
| NUDT16 | hsa-miR-5011-3p  |
| NUDT16 | hsa-miR-3117-3p  |
| NUDT16 | hsa-miR-6870-3p  |
| NUDT16 | hsa-miR-875-5p   |
| NUDT16 | hsa-miR-6871-3p  |
| NUDT16 | hsa-miR-8893     |
| NUDT16 | hsa-miR-7024-5p  |
| NUDT16 | hsa-miR-8068     |
| NUDT16 | hsa-miR-7675-3p  |
| NUDT16 | hsa-miR-6818-3p  |
| NUDT16 | hsa-miR-20-5p    |
| NUDT16 | hsa-miR-4802-5p  |
| NUDT16 | hsa-miR-5681b    |
| NUDT16 | hsa-miR-3146     |
| NUDT16 | hsa-miR-5006-5p  |
| NUDT16 | hsa-miR-145-5p   |
| NUDT16 | hsa-miR-3113-5p  |
| NUDT16 | hsa-miR-6748-3p  |
| NUDT16 | hsa-miR-2376     |
| NUDT16 | hsa-miR-467-3p   |
| NUDT16 | hsa-miR-1264-5p  |
| NUDT16 | hsa-miR-203b-3p  |
| NUDT16 | hsa-miR-3151-5p  |
| NUDT16 | hsa-miR-3664-3p  |
| NUDT16 | hsa-miR-375-3p   |
| NUDT16 | hsa-miR-136-5p   |
| NUDT16 | hsa-miR-7204-3p  |
| NUDT16 | hsa-miR-4320     |
| NUDT16 | hsa-miR-7177-5p  |
| NUDT16 | hsa-miR-6797-5p  |

|        |                  |
|--------|------------------|
| NUDT16 | hsa-miR-149-5p   |
| NUDT16 | hsa-miR-6794-3p  |
| NUDT16 | hsa-miR-5008-3p  |
| NUDT16 | hsa-miR-497-3p   |
| NUDT16 | hsa-miR-214-3p   |
| NUDT16 | hsa-miR-6769a-5p |
| NUDT16 | hsa-miR-4303     |
| NUDT16 | hsa-miR-7068-3p  |
| NUDT16 | hsa-miR-1323-5p  |
| NUDT16 | hsa-miR-6715-3p  |
| NUDT16 | hsa-miR-6358     |
| NUDT16 | hsa-miR-106-5p   |
| NUDT16 | hsa-miR-6388     |
| NUDT16 | hsa-miR-874-5p   |
| NUDT16 | hsa-miR-495-5p   |
| NUDT16 | hsa-miR-291b-3p  |
| NUDT16 | hsa-miR-2285t    |
| NUDT16 | hsa-miR-4652-3p  |
| NUDT16 | hsa-miR-7649-5p  |
| NUDT16 | hsa-miR-3194-3p  |
| NUDT16 | hsa-miR-7864     |
| NUDT16 | hsa-miR-3095-3p  |
| NUDT16 | hsa-miR-551b-5p  |
| NUDT16 | hsa-miR-888-5p   |
| NUDT16 | hsa-miR-4492     |
| NUDT16 | hsa-miR-7685-5p  |
| NUDT16 | hsa-miR-1225-5p  |
| NUDT16 | hsa-miR-3473c    |
| NUDT16 | hsa-miR-3095-5p  |
| NUDT16 | hsa-miR-6952-3p  |
| NUDT16 | hsa-miR-7113-3p  |
| NUDT16 | hsa-miR-188-5p   |
| NUDT16 | hsa-miR-181-3p   |
| NUDT16 | hsa-miR-605      |
| NUDT16 | hsa-miR-3090-5p  |
| NUDT16 | hsa-miR-34c-5p   |
| NUDT16 | hsa-miR-7007-5p  |
| NUDT16 | hsa-miR-8058     |
| NUDT16 | hsa-miR-7152-5p  |
| NUDT16 | hsa-miR-3120-3p  |
| NUDT16 | hsa-miR-518c-5p  |
| NUDT16 | hsa-miR-6922-3p  |
| NUDT16 | hsa-miR-3140-3p  |
| NUDT16 | hsa-miR-687      |
| NUDT16 | hsa-miR-6317     |
| NUDT16 | hsa-miR-374-5p   |

|        |                  |
|--------|------------------|
| NUDT16 | hsa-miR-4456     |
| NUDT16 | hsa-miR-4760-5p  |
| NUDT16 | hsa-miR-1238-3p  |
| NUDT16 | hsa-miR-3194-5p  |
| NUDT16 | hsa-miR-9768-3p  |
| NUDT16 | hsa-miR-600      |
| NUDT16 | hsa-miR-6895-3p  |
| NUDT16 | hsa-miR-323      |
| NUDT16 | hsa-miR-6910-3p  |
| NUDT16 | hsa-miR-532-5p   |
| NUDT16 | hsa-miR-6793-3p  |
| NUDT16 | hsa-miR-4668-3p  |
| NUDT16 | hsa-miR-193a-5p  |
| NUDT16 | hsa-miR-6930-5p  |
| NUDT16 | hsa-miR-873-5p   |
| NUDT16 | hsa-miR-31-3p    |
| NUDT16 | hsa-miR-6720-5p  |
| NUDT16 | hsa-miR-4489     |
| NUDT16 | hsa-miR-6832-5p  |
| NUDT16 | hsa-miR-2467-3p  |
| NUDT16 | hsa-miR-4793-3p  |
| NUDT16 | hsa-miR-578      |
| NUDT16 | hsa-miR-421      |
| NUDT16 | hsa-miR-3157-3p  |
| NUDT16 | hsa-miR-330-3p   |
| NUDT16 | hsa-miR-8119     |
| NUDT16 | hsa-miR-4774-5p  |
| NUDT16 | hsa-miR-130-3p   |
| NUDT16 | hsa-miR-132-3p   |
| NUDT16 | hsa-miR-8075     |
| NUDT16 | hsa-miR-6806-5p  |
| NUDT16 | hsa-miR-7855-5p  |
| NUDT16 | hsa-miR-1226-3p  |
| NUDT16 | hsa-miR-3119     |
| NUDT16 | hsa-miR-5625-5p  |
| NUDT16 | hsa-miR-513a-5p  |
| NUDT16 | hsa-miR-548az-5p |
| NUDT16 | hsa-miR-4284     |
| NUDT16 | hsa-miR-3612     |
| NUDT16 | hsa-miR-376c     |
| NUDT16 | hsa-miR-6873-3p  |
| NUDT16 | hsa-miR-1255-5p  |
| NUDT16 | hsa-miR-518      |
| NUDT16 | hsa-miR-5589-3p  |
| NUDT16 | hsa-miR-378d     |
| NUDT16 | hsa-miR-7213-5p  |

|        |                   |
|--------|-------------------|
| NUDT16 | hsa-miR-7107-3p   |
| NUDT16 | hsa-miR-628-5p    |
| NUDT16 | hsa-miR-10        |
| NUDT16 | hsa-miR-5129-5p   |
| NUDT16 | hsa-miR-652-5p    |
| NUDT16 | hsa-miR-6983-5p   |
| NUDT16 | hsa-miR-6732-5p   |
| NUDT16 | hsa-miR-8801      |
| NUDT16 | hsa-miR-155-3p    |
| NUDT16 | hsa-miR-7201-5p   |
| NUDT16 | hsa-miR-6907-5p   |
| NUDT16 | hsa-miR-294-3p    |
| NUDT16 | hsa-miR-3663-5p   |
| NUDT16 | hsa-miR-128-3p    |
| NUDT16 | hsa-miR-6780b-3p  |
| NUDT16 | hsa-miR-6752-5p   |
| NUDT16 | hsa-miR-4725-3p   |
| NUDT16 | hsa-miR-582-5p    |
| NUDT16 | hsa-miR-8857      |
| NUDT16 | hsa-miR-6982-3p   |
| NUDT16 | hsa-miR-142       |
| NUDT16 | hsa-miR-580-5p    |
| NUDT16 | hsa-miR-1191b-5p  |
| NUDT16 | hsa-miR-587       |
| NUDT16 | hsa-miR-1296      |
| NUDT16 | hsa-miR-208a-5p   |
| NUDT16 | hsa-miR-938       |
| NUDT16 | hsa-miR-4795-5p   |
| NUDT16 | hsa-miR-4756-3p   |
| NUDT16 | hsa-miR-3689-3p   |
| NUDT16 | hsa-miR-3606-3p   |
| NUDT16 | hsa-miR-7052-5p   |
| NUDT16 | hsa-miR-3147      |
| NUDT16 | hsa-miR-660-3p    |
| NUDT16 | hsa-miR-570-3p    |
| NUDT16 | hsa-miR-34b-5p    |
| NUDT16 | hsa-miR-466ade-3p |
| NUDT16 | hsa-miR-1836      |
| NUDT16 | hsa-miR-6883-5p   |
| NUDT16 | hsa-miR-3078-3p   |
| NUDT16 | hsa-miR-4498      |
| NUDT16 | hsa-miR-3164      |
| NUDT16 | hsa-miR-362-5p    |
| NUDT16 | hsa-miR-3064      |
| NUDT16 | hsa-miR-703       |
| NUDT16 | hsa-miR-8842      |



|        |                  |
|--------|------------------|
| NUDT16 | hsa-miR-551-5p   |
| NUDT16 | hsa-miR-2681-3p  |
| NUDT16 | hsa-miR-3187-3p  |
| NUDT16 | hsa-miR-4794     |
| NUDT16 | hsa-miR-506-3p   |
| NUDT16 | hsa-miR-181a-3p  |
| NUDT16 | hsa-miR-6905-3p  |
| NUDT16 | hsa-miR-3662     |
| NUDT16 | hsa-miR-6890-3p  |
| NUDT16 | hsa-miR-4758-5p  |
| NUDT16 | hsa-miR-708-3p   |
| NUDT16 | hsa-miR-3138     |
| NUDT16 | hsa-miR-3622b-3p |
| NUDT16 | hsa-miR-3176     |
| NUDT16 | hsa-miR-6397     |
| NUDT16 | hsa-miR-6824-3p  |
| NUDT16 | hsa-miR-1254     |
| NUDT16 | hsa-miR-6901-3p  |
| NUDT16 | hsa-miR-4463     |
| NUDT16 | hsa-miR-3671     |
| NUDT16 | hsa-miR-206-3p   |
| NUDT16 | hsa-miR-96-3p    |
| NUDT16 | hsa-miR-2350     |
| NUDT16 | hsa-miR-7159-3p  |
| NUDT16 | hsa-miR-6957-5p  |
| NUDT16 | hsa-miR-6824-5p  |
| NUDT16 | hsa-miR-4522     |
| NUDT16 | hsa-miR-6949-5p  |
| NUDT16 | hsa-miR-491-3p   |
| NUDT16 | hsa-miR-1292-5p  |
| NUDT16 | hsa-miR-324-3p   |
| NUDT16 | hsa-miR-7206-5p  |
| NUDT16 | hsa-miR-199-3p   |
| NUDT16 | hsa-miR-549-5p   |
| NUDT16 | hsa-miR-1839     |
| NUDT16 | hsa-miR-6318     |
| NUDT16 | hsa-miR-943      |
| NUDT16 | hsa-miR-7221-5p  |
| NUDT16 | hsa-miR-8819     |
| NUDT16 | hsa-miR-6888-3p  |
| NUDT16 | hsa-miR-454-3p   |
| NUDT16 | hsa-miR-295-5p   |
| NUDT16 | hsa-miR-4435     |
| NUDT16 | hsa-miR-624-5p   |
| NUDT16 | hsa-miR-520g-5p  |
| NUDT16 | hsa-miR-302d-5p  |

|        |                 |
|--------|-----------------|
| NUDT16 | hsa-miR-374c-5p |
| NUDT16 | hsa-miR-665-5p  |
| NUDT16 | hsa-miR-598-3p  |
| NUDT16 | hsa-miR-224-5p  |
| NUDT16 | hsa-miR-93-5p   |
| NUDT16 | hsa-miR-7688-5p |
| NUDT16 | hsa-miR-655-5p  |
| NUDT16 | hsa-miR-17-3p   |
| NUDT16 | hsa-miR-4711-3p |
| NUDT16 | hsa-miR-4792    |
| NUDT16 | hsa-miR-146b-3p |
| NUDT16 | hsa-miR-7656-3p |
| NUDT16 | hsa-miR-216b-5p |
| NUDT16 | hsa-miR-666-3p  |
| NUDT16 | hsa-miR-7020-5p |
| NUDT16 | hsa-miR-200c-5p |
| NUDT16 | hsa-miR-8804    |
| NUDT16 | hsa-miR-136-5p  |
| NUDT16 | hsa-miR-29-5p   |
| NUDT16 | hsa-miR-1207-3p |
| NUDT16 | hsa-miR-513     |
| NUDT16 | hsa-miR-3568    |
| NUDT16 | hsa-miR-6802-3p |
| NUDT16 | hsa-miR-4775    |
| NUDT16 | hsa-miR-7156-5p |
| NUDT16 | hsa-miR-582-5p  |
| NUDT16 | hsa-miR-4727-3p |
| NUDT16 | hsa-miR-340-5p  |
| NUDT16 | hsa-miR-409     |
| NUDT16 | hsa-miR-7170-3p |
| NUDT16 | hsa-miR-6723-5p |
| NUDT16 | hsa-miR-506-3p  |
| NUDT16 | hsa-miR-516a    |
| NUDT16 | hsa-miR-6855-3p |
| NUDT16 | hsa-miR-6966-5p |
| NUDT16 | hsa-miR-8077    |
| NUDT16 | hsa-miR-7084-3p |
| NUDT16 | hsa-miR-6981-5p |
| NUDT16 | hsa-miR-4439    |
| NUDT16 | hsa-miR-7106-5p |
| NUDT16 | hsa-miR-2115-3p |
| NUDT16 | hsa-miR-203-5p  |
| NUDT16 | hsa-miR-7118-5p |
| NUDT16 | hsa-miR-2368-3p |
| NUDT16 | hsa-miR-1322    |
| NUDT16 | hsa-miR-3590-5p |

|        |                  |
|--------|------------------|
| NUDT16 | hsa-miR-15       |
| NUDT16 | hsa-miR-2276-3p  |
| NUDT16 | hsa-miR-5696     |
| NUDT16 | hsa-miR-1255     |
| NUDT16 | hsa-miR-4524b-3p |
| NUDT16 | hsa-miR-3126-5p  |
| NUDT16 | hsa-miR-215-3p   |
| NUDT16 | hsa-miR-6529-5p  |
| NUDT16 | hsa-miR-7208-5p  |
| NUDT16 | hsa-miR-548ar-3p |
| NUDT16 | hsa-miR-516a-3p  |
| NUDT16 | hsa-miR-6976-3p  |
| NUDT16 | hsa-miR-6990-3p  |
| NUDT16 | hsa-miR-29b-1-5p |
| NUDT16 | hsa-miR-664a-5p  |
| NUDT16 | hsa-miR-758-5p   |
| NUDT16 | hsa-miR-6845-5p  |
| NUDT16 | hsa-miR-5582-3p  |
| NUDT16 | hsa-miR-669d-5p  |
| NUDT16 | hsa-miR-6754-5p  |
| NUDT16 | hsa-miR-6728-3p  |
| NUDT16 | hsa-miR-8851     |
| NUDT16 | hsa-miR-1188-5p  |
| NUDT16 | hsa-miR-586      |
| NUDT16 | hsa-miR-5095     |
| NUDT16 | hsa-miR-4315     |
| NUDT16 | hsa-miR-22-3p    |
| NUDT16 | hsa-miR-6797-3p  |
| NUDT16 | hsa-miR-1207     |
| NUDT16 | hsa-miR-1323     |
| NUDT16 | hsa-miR-5196-3p  |
| NUDT16 | hsa-miR-301a-5p  |
| NUDT16 | hsa-miR-4724-5p  |
| NUDT16 | hsa-miR-219-5p   |
| NUDT16 | hsa-miR-7669-3p  |
| NUDT16 | hsa-miR-8814     |
| NUDT16 | hsa-miR-6790-5p  |
| NUDT16 | hsa-miR-7185-5p  |
| NUDT16 | hsa-miR-1894-3p  |
| NUDT16 | hsa-miR-693-5p   |
| NUDT16 | hsa-miR-1237-3p  |
| NUDT16 | hsa-miR-548an    |
| NUDT16 | hsa-miR-7012-3p  |
| NUDT16 | hsa-miR-4441     |
| NUDT16 | hsa-miR-4504     |
| NUDT16 | hsa-miR-7224-5p  |

|        |                  |
|--------|------------------|
| NUDT16 | hsa-miR-3929     |
| NUDT16 | hsa-miR-4446-5p  |
| NUDT16 | hsa-miR-605-5p   |
| NUDT16 | hsa-miR-1298     |
| NUDT16 | hsa-miR-138-1-3p |
| NUDT16 | hsa-miR-3060-3p  |
| NUDT16 | hsa-miR-454      |
| NUDT16 | hsa-miR-503-5p   |
| NUDT16 | hsa-miR-6761-5p  |
| NUDT16 | hsa-miR-4750-3p  |
| NUDT16 | hsa-miR-676-3p   |
| NUDT16 | hsa-miR-597      |
| NUDT16 | hsa-miR-6849-3p  |
| NUDT16 | hsa-miR-24-5p    |
| NUDT16 | hsa-miR-589-5p   |
| NUDT16 | hsa-miR-646      |
| NUDT16 | hsa-miR-18       |
| NUDT16 | hsa-miR-2861     |
| NUDT16 | hsa-miR-499a-3p  |
| NUDT16 | hsa-miR-328      |
| NUDT16 | hsa-miR-7207-5p  |
| NUDT16 | hsa-miR-3136-5p  |
| NUDT16 | hsa-miR-873-5p   |
| NUDT16 | hsa-miR-101-1-5p |
| NUDT16 | hsa-miR-105-5p   |
| NUDT16 | hsa-miR-758-3p   |
| NUDT16 | hsa-miR-1899     |
| NUDT16 | hsa-miR-550a-3p  |
| NUDT16 | hsa-miR-16-2-3p  |
| NUDT16 | hsa-miR-7007-3p  |
| NUDT16 | hsa-miR-197-3p   |
| NUDT16 | hsa-miR-485-3p   |
| NUDT16 | hsa-miR-514a-3p  |
| NUDT16 | hsa-miR-1284     |
| NUDT16 | hsa-miR-5131     |
| NUDT16 | hsa-miR-5623-3p  |
| NUDT16 | hsa-miR-1228-3p  |
| NUDT16 | hsa-miR-141-3p   |
| NUDT16 | hsa-miR-1286     |
| NUDT16 | hsa-miR-660-5p   |
| NUDT16 | hsa-miR-4700-3p  |
| NUDT16 | hsa-miR-4490     |
| NUDT16 | hsa-miR-548a-3p  |
| NUDT16 | hsa-miR-6126     |
| NUDT16 | hsa-miR-6829-3p  |
| NUDT16 | hsa-miR-4742     |

|        |                  |
|--------|------------------|
| NUDT16 | hsa-miR-1299     |
| NUDT16 | hsa-miR-7187-5p  |
| NUDT16 | hsa-miR-3668     |
| NUDT16 | hsa-miR-4684-5p  |
| NUDT16 | hsa-miR-6344     |
| NUDT16 | hsa-miR-1241     |
| NUDT16 | hsa-miR-1343-3p  |
| NUDT16 | hsa-miR-301-3p   |
| NUDT16 | hsa-miR-93-5p    |
| NUDT16 | hsa-miR-3925-3p  |
| NUDT16 | hsa-miR-4292     |
| NUDT16 | hsa-miR-4499     |
| NUDT16 | hsa-miR-4664-5p  |
| NUDT16 | hsa-miR-24-3p    |
| NUDT16 | hsa-miR-4419b    |
| NUDT16 | hsa-miR-1231-5p  |
| NUDT16 | hsa-miR-1224-3p  |
| NUDT16 | hsa-miR-4692     |
| NUDT16 | hsa-miR-6846-5p  |
| NUDT16 | hsa-miR-6826-3p  |
| NUDT16 | hsa-miR-7681-3p  |
| NUDT16 | hsa-miR-7-3p     |
| NUDT16 | hsa-miR-7197-3p  |
| NUDT16 | hsa-miR-211-3p   |
| NUDT16 | hsa-miR-3151-3p  |
| NUDT16 | hsa-miR-708-5p   |
| NUDT16 | hsa-miR-3586-5p  |
| NUDT16 | hsa-miR-6316     |
| NUDT16 | hsa-miR-7684-3p  |
| NUDT16 | hsa-miR-3611     |
| NUDT16 | hsa-miR-343      |
| NUDT16 | hsa-miR-4446     |
| NUDT16 | hsa-miR-6127     |
| NUDT16 | hsa-miR-4291     |
| NUDT16 | hsa-miR-1239     |
| NUDT16 | hsa-miR-3613-3p  |
| NUDT16 | hsa-miR-669j     |
| NUDT16 | hsa-miR-4312     |
| NUDT16 | hsa-miR-291-5p   |
| NUDT16 | hsa-miR-6950-5p  |
| NUDT16 | hsa-miR-140-3p.2 |
| NUDT16 | hsa-miR-764      |
| NUDT16 | hsa-miR-7189-3p  |
| NUDT16 | hsa-miR-455-3p   |
| NUDT16 | hsa-miR-6970-5p  |
| NUDT16 | hsa-miR-6889-3p  |

|        |                   |
|--------|-------------------|
| NUDT16 | hsa-miR-125a-3p   |
| NUDT16 | hsa-miR-376a-2-5p |
| NUDT16 | hsa-miR-7000-3p   |
| NUDT16 | hsa-miR-7659-5p   |
| NUDT16 | hsa-miR-7226-3p   |
| NUDT16 | hsa-miR-107-3p    |
| NUDT16 | hsa-miR-214-3p    |
| NUDT16 | hsa-miR-290       |
| NUDT16 | hsa-miR-6780a-3p  |
| NUDT16 | hsa-miR-1236-3p   |
| NUDT16 | hsa-miR-8853      |
| NUDT16 | hsa-miR-548g-3p   |
| NUDT16 | hsa-miR-362-5p    |
| NUDT16 | hsa-miR-466       |
| NUDT16 | hsa-miR-6764-5p   |
| NUDT16 | hsa-miR-7106-3p   |
| NUDT16 | hsa-miR-6857-3p   |
| NUDT16 | hsa-miR-301       |
| NUDT16 | hsa-miR-3065-5p   |
| NUDT16 | hsa-miR-371b-3p   |
| NUDT16 | hsa-miR-4539      |
| NUDT16 | hsa-miR-6874-3p   |
| NUDT16 | hsa-miR-888-5p    |
| NUDT16 | hsa-miR-30-3p     |
| NUDT16 | hsa-miR-345-5p    |
| NUDT16 | hsa-miR-3973      |
| NUDT16 | hsa-miR-6529      |
| NUDT16 | hsa-miR-7172-3p   |
| NUDT16 | hsa-miR-124-3p.2  |
| NUDT16 | hsa-miR-520       |
| NUDT16 | hsa-miR-4483      |
| NUDT16 | hsa-miR-6730-3p   |
| NUDT16 | hsa-miR-7054-3p   |
| NUDT16 | hsa-miR-450a      |
| NUDT16 | hsa-miR-4663      |
| NUDT16 | hsa-miR-1-3p      |
| NUDT16 | hsa-miR-7186-3p   |
| NUDT16 | hsa-miR-595       |
| NUDT16 | hsa-miR-142-5p    |
| NUDT16 | hsa-miR-101a-5p   |
| NUDT16 | hsa-miR-487-5p    |
| NUDT16 | hsa-miR-19        |
| NUDT16 | hsa-miR-1249-5p   |
| NUDT16 | hsa-miR-219c-3p   |
| NUDT16 | hsa-miR-5094      |
| NUDT16 | hsa-miR-4708-5p   |

|        |                   |
|--------|-------------------|
| NUDT16 | hsa-miR-1255a     |
| NUDT16 | hsa-miR-483-5p    |
| NUDT16 | hsa-miR-465abc-3p |
| NUDT16 | hsa-miR-4759      |
| NUDT16 | hsa-miR-874       |
| NUDT16 | hsa-miR-510       |
| NUDT16 | hsa-miR-3102-3p   |
| NUDT16 | hsa-miR-6887-3p   |
| NUDT16 | hsa-miR-8892      |
| NUDT16 | hsa-miR-4659a-3p  |
| NUDT16 | hsa-miR-6348      |
| NUDT16 | hsa-miR-767       |
| NUDT16 | hsa-miR-3921      |
| NUDT16 | hsa-miR-4457      |
| NUDT16 | hsa-miR-6836-3p   |
| NUDT16 | hsa-miR-126-3p.1  |
| NUDT16 | hsa-miR-4269      |
| NUDT16 | hsa-miR-7184-5p   |
| NUDT16 | hsa-miR-3548      |
| NUDT16 | hsa-miR-200a-3p   |
| NUDT16 | hsa-miR-4308      |
| NUDT16 | hsa-miR-384-3p    |
| NUDT16 | hsa-miR-33-5p     |
| NUDT16 | hsa-miR-889       |
| NUDT16 | hsa-miR-6800-5p   |
| NUDT16 | hsa-miR-872-3p    |
| NUDT16 | hsa-miR-3975      |
| NUDT16 | hsa-miR-1184      |
| NUDT16 | hsa-miR-6914-3p   |
| NUDT16 | hsa-miR-883a-5p   |
| NUDT16 | hsa-miR-8097      |
| NUDT16 | hsa-miR-6322      |
| NUDT16 | hsa-miR-8901      |
| NUDT16 | hsa-miR-129-5p    |
| NUDT16 | hsa-miR-141-3p    |
| NUDT16 | hsa-miR-1288-5p   |
| NUDT16 | hsa-miR-302a-5p   |
| NUDT16 | hsa-miR-6392-5p   |
| NUDT16 | hsa-miR-7974      |
| NUDT16 | hsa-miR-6510-5p   |
| NUDT16 | hsa-miR-532-3p    |
| NUDT16 | hsa-miR-6751-5p   |
| NUDT16 | hsa-miR-6845-3p   |
| NUDT16 | hsa-miR-8795      |
| NUDT16 | hsa-miR-6750-5p   |
| NUDT16 | hsa-miR-7194-3p   |

|        |                  |
|--------|------------------|
| NUDT16 | hsa-miR-8863     |
| NUDT16 | hsa-miR-15-5p    |
| NUDT16 | hsa-miR-1273h-3p |
| NUDT16 | hsa-miR-187-3p   |
| NUDT16 | hsa-miR-550      |
| NUDT16 | hsa-miR-4289     |
| NUDT16 | hsa-miR-1668     |
| NUDT16 | hsa-miR-326-3p   |
| NUDT16 | hsa-miR-107-5p   |
| NUDT16 | hsa-miR-6823-5p  |
| NUDT16 | hsa-miR-345-5p   |
| NUDT16 | hsa-miR-367-5p   |
| NUDT16 | hsa-miR-484      |
| NUDT16 | hsa-miR-19b-5p   |
| NUDT16 | hsa-miR-182-5p   |
| NUDT16 | hsa-miR-23-5p    |
| NUDT16 | hsa-miR-4275     |
| NUDT16 | hsa-miR-323b-3p  |
| NUDT16 | hsa-miR-101-3p   |
| NUDT16 | hsa-miR-1188-3p  |
| NUDT16 | hsa-miR-7183-3p  |
| NUDT16 | hsa-miR-329      |
| NUDT16 | hsa-miR-7226-5p  |
| NUDT16 | hsa-miR-7168-3p  |
| NUDT16 | hsa-miR-302      |
| NUDT16 | hsa-miR-766-3p   |
| NUDT16 | hsa-miR-4653-5p  |
| NUDT16 | hsa-miR-7031-5p  |
| NUDT16 | hsa-miR-504-5p   |
| NUDT16 | hsa-miR-4254     |
| NUDT16 | hsa-miR-4795-3p  |
| NUDT16 | hsa-miR-5587-5p  |
| NUDT16 | hsa-miR-137-3p   |
| NUDT16 | hsa-miR-7178-3p  |
| NUDT16 | hsa-miR-532-5p   |
| NUDT16 | hsa-miR-585-5p   |
| NUDT16 | hsa-miR-371a-5p  |
| NUDT16 | hsa-miR-3544-5p  |
| NUDT16 | hsa-miR-1306-5p  |
| NUDT16 | hsa-miR-6911-5p  |
| NUDT16 | hsa-miR-653      |
| NUDT16 | hsa-miR-335-3p   |
| NUDT16 | hsa-miR-1894-5p  |
| NUDT16 | hsa-miR-7668-5p  |
| NUDT16 | hsa-miR-1298-3p  |
| NUDT16 | hsa-miR-876-5p   |



|        |                  |
|--------|------------------|
| NUDT16 | hsa-miR-7076-5p  |
| NUDT16 | hsa-miR-511-5p   |
| NUDT16 | hsa-miR-4474-3p  |
| NUDT16 | hsa-miR-3145-3p  |
| NUDT16 | hsa-miR-6829-5p  |
| NUDT16 | hsa-miR-146a-3p  |
| NUDT16 | hsa-miR-6832-3p  |
| NUDT16 | hsa-miR-122      |
| NUDT16 | hsa-miR-218-5p   |
| NUDT16 | hsa-miR-5622-3p  |
| NUDT16 | hsa-miR-513c-3p  |
| NUDT16 | hsa-miR-6814-5p  |
| NUDT16 | hsa-miR-3098-3p  |
| NUDT16 | hsa-miR-505-3p.2 |
| NUDT16 | hsa-miR-8865     |
| NUDT16 | hsa-miR-296-3p   |
| NUDT16 | hsa-miR-126-5p   |
| NUDT16 | hsa-miR-1968-3p  |
| NUDT16 | hsa-miR-4659b-5p |
| NUDT16 | hsa-miR-3575     |
| NUDT16 | hsa-miR-152-3p   |
| NUDT16 | hsa-miR-4697-5p  |
| NUDT16 | hsa-miR-4726-3p  |
| NUDT16 | hsa-miR-384-5p   |
| NUDT16 | hsa-miR-3100-5p  |
| NUDT16 | hsa-miR-577-5p   |
| NUDT16 | hsa-miR-7166-5p  |
| NUDT16 | hsa-miR-361-3p   |
| NUDT16 | hsa-miR-7030-5p  |
| NUDT16 | hsa-miR-2893     |
| NUDT16 | hsa-miR-8873a    |
| NUDT16 | hsa-miR-455-3p.1 |
| NUDT16 | hsa-miR-6973a-3p |
| NUDT16 | hsa-miR-4659b-3p |
| NUDT16 | hsa-miR-4473     |
| NUDT16 | hsa-miR-7175-5p  |
| NUDT16 | hsa-miR-6855-5p  |
| NUDT16 | hsa-miR-505-5p   |
| NUDT16 | hsa-miR-1255b-5p |
| NUDT16 | hsa-miR-188-5p   |
| NUDT16 | hsa-miR-679-3p   |
| NUDT16 | hsa-miR-7865     |
| NUDT16 | hsa-miR-7703     |
| NUDT16 | hsa-miR-6833-3p  |
| NUDT16 | hsa-miR-3106-3p  |
| NUDT16 | hsa-miR-4521     |

|        |                  |
|--------|------------------|
| NUDT16 | hsa-miR-340-5p   |
| NUDT16 | hsa-miR-297bc-3p |
| NUDT16 | hsa-miR-1237-5p  |
| NUDT16 | hsa-miR-6896-3p  |
| NUDT16 | hsa-miR-672-5p   |
| NUDT16 | hsa-miR-3070-5p  |
| NUDT16 | hsa-miR-544b     |
| NUDT16 | hsa-miR-3113-3p  |
| NUDT16 | hsa-miR-6992-5p  |
| NUDT16 | hsa-miR-7042-5p  |
| NUDT16 | hsa-miR-1185-5p  |
| NUDT16 | hsa-miR-1930-5p  |
| NUDT16 | hsa-miR-494-3p   |
| NUDT16 | hsa-miR-1226-3p  |
| NUDT16 | hsa-miR-1982-3p  |
| NUDT16 | hsa-miR-372-3p   |
| NUDT16 | hsa-miR-3156-3p  |
| NUDT16 | hsa-miR-7066-5p  |
| NUDT16 | hsa-miR-7015-5p  |
| NUDT16 | hsa-miR-6848-5p  |
| NUDT16 | hsa-miR-19-5p    |
| NUDT16 | hsa-miR-7017-5p  |
| NUDT16 | hsa-miR-879-3p   |
| NUDT16 | hsa-miR-486-5p   |
| NUDT16 | hsa-miR-7001-3p  |
| NUDT16 | hsa-miR-222-3p   |
| NUDT16 | hsa-miR-7665-3p  |
| NUDT16 | hsa-miR-6529b    |
| NUDT16 | hsa-miR-8847     |
| NUDT16 | hsa-miR-20-3p    |
| NUDT16 | hsa-miR-6396     |
| NUDT16 | hsa-miR-8827     |
| NUDT16 | hsa-miR-6767-3p  |
| NUDT16 | hsa-miR-1245-3p  |
| NUDT16 | hsa-miR-556-5p   |
| NUDT16 | hsa-miR-124      |
| NUDT16 | hsa-miR-6134     |
| NUDT16 | hsa-miR-384      |
| NUDT16 | hsa-miR-6130     |
| NUDT16 | hsa-miR-378a-5p  |
| NUDT16 | hsa-miR-5187-3p  |
| NUDT16 | hsa-miR-6933-3p  |
| NUDT16 | hsa-miR-708-5p   |
| NUDT16 | hsa-miR-6792-3p  |
| NUDT16 | hsa-miR-3559-5p  |
| NUDT16 | hsa-miR-6945-5p  |

|        |                  |
|--------|------------------|
| NUDT16 | hsa-miR-873-5p.2 |
| NUDT16 | hsa-miR-548h-5p  |
| NUDT16 | hsa-miR-5197-3p  |
| NUDT16 | hsa-miR-939-5p   |
| NUDT16 | hsa-miR-2393     |
| NUDT16 | hsa-miR-3591     |
| NUDT16 | hsa-miR-547-3p   |
| NUDT16 | hsa-miR-10a-3p   |
| NUDT16 | hsa-miR-4747-5p  |
| NUDT16 | hsa-miR-147-5p   |
| NUDT16 | hsa-miR-4290     |
| NUDT16 | hsa-miR-4299     |
| NUDT16 | hsa-miR-344      |
| NUDT16 | hsa-miR-599      |
| NUDT16 | hsa-miR-2415-3p  |
| NUDT16 | hsa-miR-1253     |
| NUDT16 | hsa-miR-7087-3p  |
| NUDT16 | hsa-miR-202-3p   |
| NUDT16 | hsa-miR-6912-5p  |
| NUDT16 | hsa-miR-5192     |
| NUDT16 | hsa-miR-542-3p   |
| NUDT16 | hsa-miR-4769-3p  |
| NUDT16 | hsa-miR-204-5p   |
| NUDT16 | hsa-miR-676-5p   |
| NUDT16 | hsa-miR-3978     |
| NUDT16 | hsa-miR-520g-3p  |
| NUDT16 | hsa-miR-3594-5p  |
| NUDT16 | hsa-miR-467g     |
| NUDT16 | hsa-miR-7075-5p  |
| NUDT16 | hsa-miR-526b-5p  |
| NUDT16 | hsa-miR-293-5p   |
| NUDT16 | hsa-miR-344h-3p  |
| NUDT16 | hsa-miR-4418     |
| NUDT16 | hsa-miR-6904-5p  |
| NUDT16 | hsa-miR-344-5p   |
| NUDT16 | hsa-miR-6905-5p  |
| NUDT16 | hsa-miR-466mo-3p |
| NUDT16 | hsa-miR-302b-5p  |
| NUDT16 | hsa-miR-449-5p   |
| NUDT16 | hsa-miR-3192     |
| NUDT16 | hsa-miR-1226-5p  |
| NUDT16 | hsa-miR-6985-5p  |
| NUDT16 | hsa-miR-6076     |
| NUDT16 | hsa-miR-6810-5p  |
| NUDT16 | hsa-miR-3682-3p  |
| NUDT16 | hsa-miR-383-3p   |

|        |                  |
|--------|------------------|
| NUDT16 | hsa-miR-3938-3p  |
| NUDT16 | hsa-miR-1931     |
| NUDT16 | hsa-miR-1265     |
| NUDT16 | hsa-miR-98-5p    |
| NUDT16 | hsa-miR-6784-3p  |
| NUDT16 | hsa-miR-6898-3p  |
| NUDT16 | hsa-miR-204-3p   |
| NUDT16 | hsa-miR-302-3p   |
| NUDT16 | hsa-miR-379-5p   |
| NUDT16 | hsa-miR-5125     |
| NUDT16 | hsa-miR-520f-5p  |
| NUDT16 | hsa-miR-6963-3p  |
| NUDT16 | hsa-miR-128-5p   |
| NUDT16 | hsa-miR-203-3p.2 |
| NUDT16 | hsa-miR-561-5p   |
| NUDT16 | hsa-miR-1892     |
| NUDT16 | hsa-miR-136-3p   |
| NUDT16 | hsa-miR-193      |
| NUDT16 | hsa-miR-151      |
| NUDT16 | hsa-miR-378j     |
| NUDT16 | hsa-miR-7231-5p  |
| NUDT16 | hsa-miR-206-5p   |
| NUDT16 | hsa-miR-650abc   |
| NUDT16 | hsa-miR-625-5p   |
| NUDT16 | hsa-miR-519b-3p  |
| NUDT16 | hsa-miR-1537-5p  |
| NUDT16 | hsa-miR-6501-5p  |
| NUDT16 | hsa-miR-6541     |
| NUDT16 | hsa-miR-6923-3p  |
| NUDT16 | hsa-miR-7032-3p  |
| NUDT16 | hsa-miR-495-3p   |
| NUDT16 | hsa-miR-4648     |
| NUDT16 | hsa-miR-9-5p     |
| NUDT16 | hsa-miR-3063-3p  |
| NUDT16 | hsa-miR-588      |
| NUDT16 | hsa-miR-6956-5p  |
| NUDT16 | hsa-miR-194-5p   |
| NUDT16 | hsa-miR-4529-5p  |
| NUDT16 | hsa-miR-509-3-5p |
| NUDT16 | hsa-miR-6798-5p  |
| NUDT16 | hsa-miR-1911-5p  |
| NUDT16 | hsa-miR-584-5p   |
| NUDT16 | hsa-miR-584-3p   |
| NUDT16 | hsa-miR-2290     |
| NUDT16 | hsa-miR-1983     |
| NUDT16 | hsa-miR-7068-5p  |

|        |                  |
|--------|------------------|
| NUDT16 | hsa-miR-8854     |
| NUDT16 | hsa-miR-890      |
| NUDT16 | hsa-miR-6941-5p  |
| NUDT16 | hsa-miR-514-3p   |
| NUDT16 | hsa-miR-1960     |
| NUDT16 | hsa-miR-34bc-3p  |
| NUDT16 | hsa-miR-890-3p   |
| NUDT16 | hsa-miR-655      |
| NUDT16 | hsa-miR-677-5p   |
| NUDT16 | hsa-miR-7648-3p  |
| NUDT16 | hsa-miR-204-5p   |
| NUDT16 | hsa-miR-7218-3p  |
| NUDT16 | hsa-miR-3135b    |
| NUDT16 | hsa-miR-124-5p   |
| NUDT16 | hsa-miR-6867-3p  |
| NUDT16 | hsa-miR-5572     |
| NUDT16 | hsa-miR-33-3p    |
| NUDT16 | hsa-miR-7052-3p  |
| NUDT16 | hsa-miR-330-3p.2 |
| NUDT16 | hsa-miR-1178-3p  |
| NUDT16 | hsa-miR-3670     |
| NUDT16 | hsa-miR-379-3p   |
| NUDT16 | hsa-miR-1207-5p  |
| NUDT16 | hsa-miR-3154     |
| NUDT16 | hsa-miR-8829     |
| NUDT16 | hsa-miR-5582-5p  |
| NUDT16 | hsa-miR-3124-3p  |
| NUDT16 | hsa-miR-95-5p    |
| NUDT16 | hsa-miR-3189-5p  |
| NUDT16 | hsa-miR-6964-5p  |
| NUDT16 | hsa-miR-4271     |
| NUDT16 | hsa-miR-8791     |
| NUDT16 | hsa-miR-18-3p    |
| NUDT16 | hsa-miR-7057-5p  |
| NUDT16 | hsa-miR-669h-5p  |
| NUDT16 | hsa-miR-1912     |
| NUDT16 | hsa-miR-471-3p   |
| NUDT16 | hsa-miR-516      |
| NUDT16 | hsa-miR-2882     |
| NUDT16 | hsa-miR-6984-5p  |
| NUDT16 | hsa-miR-185-3p   |
| NUDT16 | hsa-miR-6791-3p  |
| NUDT16 | hsa-miR-3682-5p  |
| NUDT16 | hsa-miR-3096-3p  |
| NUDT16 | hsa-miR-598-5p   |
| NUDT16 | hsa-miR-8866     |

|        |                   |
|--------|-------------------|
| NUDT16 | hsa-miR-548e-3p   |
| NUDT16 | hsa-miR-4719      |
| NUDT16 | hsa-miR-1236-3p   |
| NUDT16 | hsa-miR-134-3p    |
| NUDT16 | hsa-miR-1208      |
| NUDT16 | hsa-miR-6325      |
| NUDT16 | hsa-miR-3180-5p   |
| NUDT16 | hsa-miR-23b-5p    |
| NUDT16 | hsa-miR-1266-5p   |
| NUDT16 | hsa-miR-193-3p    |
| NUDT16 | hsa-miR-548az-3p  |
| NUDT16 | hsa-miR-181b-2-3p |
| NUDT16 | hsa-miR-3692-5p   |
| NUDT16 | hsa-miR-5120      |
| NUDT16 | hsa-miR-15a-3p    |
| NUDT16 | hsa-miR-4267      |
| NUDT16 | hsa-miR-3544-3p   |
| NUDT16 | hsa-miR-7686-5p   |
| NUDT16 | hsa-miR-7064-5p   |
| NUDT16 | hsa-miR-4531      |
| NUDT16 | hsa-miR-5591-5p   |
| NUDT16 | hsa-miR-6716-5p   |
| NUDT16 | hsa-miR-4314      |
| NUDT16 | hsa-miR-6843-3p   |
| NUDT16 | hsa-miR-7048-5p   |
| NUDT16 | hsa-miR-8886      |
| NUDT16 | hsa-miR-619       |
| NUDT16 | hsa-miR-8083      |
| NUDT16 | hsa-miR-3651      |
| NUDT16 | hsa-miR-8818      |
| NUDT16 | hsa-miR-1185-5p   |
| NUDT16 | hsa-miR-487-3p    |
| NUDT16 | hsa-miR-3121-5p   |
| NUDT16 | hsa-miR-548ao-3p  |
| NUDT16 | hsa-miR-8106      |
| NUDT16 | hsa-miR-466c-5p   |
| NUDT16 | hsa-miR-5581-3p   |
| NUDT16 | hsa-miR-6932-3p   |
| NUDT16 | hsa-miR-4720-3p   |
| NUDT16 | hsa-miR-133b-5p   |
| NUDT16 | hsa-miR-7649-3p   |
| NUDT16 | hsa-miR-647       |
| NUDT16 | hsa-miR-4772-3p   |
| NUDT16 | hsa-miR-6914-5p   |
| NUDT16 | hsa-miR-8052      |
| NUDT16 | hsa-miR-2985      |

|        |                  |
|--------|------------------|
| NUDT16 | hsa-miR-7110-5p  |
| NUDT16 | hsa-miR-3654     |
| NUDT16 | hsa-miR-6734-5p  |
| NUDT16 | hsa-miR-519      |
| NUDT16 | hsa-miR-16-5p    |
| NUDT16 | hsa-miR-582-3p   |
| NUDT16 | hsa-miR-4325     |
| NUDT16 | hsa-miR-7223-5p  |
| NUDT16 | hsa-miR-7676-5p  |
| NUDT16 | hsa-miR-4322     |
| NUDT16 | hsa-miR-6401     |
| NUDT16 | hsa-miR-3064-5p  |
| NUDT16 | hsa-miR-330-3p   |
| NUDT16 | hsa-miR-7084-5p  |
| NUDT16 | hsa-miR-4519     |
| NUDT16 | hsa-miR-4695-5p  |
| NUDT16 | hsa-miR-6974-3p  |
| NUDT16 | hsa-miR-6842-3p  |
| NUDT16 | hsa-miR-5692a    |
| NUDT16 | hsa-miR-1913     |
| NUDT16 | hsa-miR-548as-3p |
| NUDT16 | hsa-miR-6955-3p  |
| NUDT16 | hsa-miR-5118     |
| NUDT16 | hsa-miR-6801-3p  |
| NUDT16 | hsa-miR-3584-5p  |
| NUDT16 | hsa-miR-8888     |
| NUDT16 | hsa-miR-4536-3p  |
| NUDT16 | hsa-miR-372      |
| NUDT16 | hsa-miR-291-3p   |
| NUDT16 | hsa-miR-4268     |
| NUDT16 | hsa-miR-4698     |
| NUDT16 | hsa-miR-7204-5p  |
| NUDT16 | hsa-miR-544a     |
| NUDT16 | hsa-miR-432-5p   |
| NUDT16 | hsa-miR-449a     |
| NUDT16 | hsa-miR-7092-5p  |
| NUDT16 | hsa-miR-3150a-5p |
| NUDT16 | hsa-miR-3665     |
| NUDT16 | hsa-miR-6930-3p  |
| NUDT16 | hsa-miR-6739-3p  |
| NUDT16 | hsa-miR-4739     |
| NUDT16 | hsa-miR-20a-3p   |
| NUDT16 | hsa-miR-181-5p   |
| NUDT16 | hsa-miR-7849-3p  |
| NUDT16 | hsa-miR-490-3p   |
| NUDT16 | hsa-miR-3942-3p  |

|        |                  |
|--------|------------------|
| NUDT16 | hsa-miR-7008-3p  |
| NUDT16 | hsa-miR-649      |
| NUDT16 | hsa-miR-4278     |
| NUDT16 | hsa-miR-605-3p   |
| NUDT16 | hsa-miR-7205-3p  |
| NUDT16 | hsa-miR-489-3p   |
| NUDT16 | hsa-miR-8821     |
| NUDT16 | hsa-miR-8799     |
| NUDT16 | hsa-miR-3174     |
| NUDT16 | hsa-miR-7191-3p  |
| NUDT16 | hsa-miR-3186-5p  |
| NUDT16 | hsa-miR-383-5p.1 |
| NUDT16 | hsa-miR-4680-3p  |
| NUDT16 | hsa-miR-7019-5p  |
| NUDT16 | hsa-miR-3541     |
| NUDT16 | hsa-miR-542-5p   |
| NUDT16 | hsa-miR-4529-3p  |
| NUDT16 | hsa-miR-6841-3p  |
| NUDT16 | hsa-miR-6515-3p  |
| NUDT16 | hsa-miR-7111-3p  |
| NUDT16 | hsa-miR-361-5p   |
| NUDT16 | hsa-miR-2297     |
| NUDT16 | hsa-miR-7976     |
| NUDT16 | hsa-miR-502-5p   |
| NUDT16 | hsa-miR-552      |
| NUDT16 | hsa-miR-296-5p   |
| NUDT16 | hsa-miR-694      |
| NUDT16 | hsa-miR-3977     |
| NUDT16 | hsa-miR-3200-5p  |
| NUDT16 | hsa-miR-323a-5p  |
| NUDT16 | hsa-miR-4460     |
| NUDT16 | hsa-miR-5001-5p  |
| NUDT16 | hsa-miR-6830-5p  |
| NUDT16 | hsa-miR-4524a-3p |
| NUDT16 | hsa-miR-4743-3p  |
| NUDT16 | hsa-miR-217      |
| NUDT16 | hsa-miR-6817-3p  |
| NUDT16 | hsa-miR-485      |
| NUDT16 | hsa-miR-7164-5p  |
| NUDT16 | hsa-miR-885-3p   |
| NUDT16 | hsa-miR-7035-5p  |
| NUDT16 | hsa-miR-7671-5p  |
| NUDT16 | hsa-miR-650d     |
| NUDT16 | hsa-miR-4999-3p  |
| NUDT16 | hsa-miR-6481     |
| NUDT16 | hsa-miR-548av-5p |



|        |                  |
|--------|------------------|
| NUDT16 | hsa-miR-3110-5p  |
| NUDT16 | hsa-miR-338-5p   |
| NUDT16 | hsa-miR-98-5p    |
| NUDT16 | hsa-miR-3170     |
| NUDT16 | hsa-miR-517a-3p  |
| NUDT16 | hsa-miR-6873-5p  |
| NUDT16 | hsa-miR-504-5p.1 |
| NUDT16 | hsa-miR-28-3p    |
| NUDT16 | hsa-miR-6727-3p  |
| NUDT16 | hsa-miR-8869     |
| NUDT16 | hsa-miR-146-5p   |
| NUDT16 | hsa-miR-6888-5p  |
| NUDT16 | hsa-miR-3653-3p  |
| NUDT16 | hsa-miR-5591-3p  |
| NUDT16 | hsa-miR-339-5p   |
| NUDT16 | hsa-miR-5006-3p  |
| NUDT16 | hsa-miR-3173-3p  |
| NUDT16 | hsa-miR-516b-3p  |
| NUDT16 | hsa-miR-6756-5p  |
| NUDT16 | hsa-miR-423-3p   |
| NUDT16 | hsa-miR-6899-5p  |
| NUDT16 | hsa-miR-548f-3p  |
| NUDT16 | hsa-miR-2110     |
| NUDT16 | hsa-miR-361-5p   |
| NUDT16 | hsa-miR-139-5p   |
| NUDT16 | hsa-miR-6858-5p  |
| NUDT16 | hsa-miR-508-3p   |
| NUDT16 | hsa-miR-3089-5p  |
| NUDT16 | hsa-miR-3924     |
| NUDT16 | hsa-miR-518bc-3p |
| NUDT16 | hsa-miR-216c-3p  |
| NUDT16 | hsa-miR-876      |
| NUDT16 | hsa-miR-21-3p    |
| NUDT16 | hsa-miR-1343-5p  |
| NUDT16 | hsa-miR-192-3p   |
| NUDT16 | hsa-miR-221-3p   |
| NUDT16 | hsa-miR-6737-5p  |
| NUDT16 | hsa-miR-4270     |
| NUDT16 | hsa-miR-4714-3p  |
| NUDT16 | hsa-miR-219-3p   |
| NUDT16 | hsa-miR-376c-3p  |
| NUDT16 | hsa-miR-5584-5p  |
| NUDT16 | hsa-miR-6392-3p  |
| NUDT16 | hsa-miR-3189-3p  |
| NUDT16 | hsa-miR-302a-3p  |
| NUDT16 | hsa-miR-331-3p   |

|        |                 |
|--------|-----------------|
| NUDT16 | hsa-miR-6847-5p |
| NUDT16 | hsa-miR-365a-3p |
| NUDT16 | hsa-miR-669c-3p |
| NUDT16 | hsa-miR-6828-3p |
| NUDT16 | hsa-miR-7231-3p |
| NUDT16 | hsa-miR-424-5p  |
| NUDT16 | hsa-miR-6319    |
| NUDT16 | hsa-miR-6403    |
| NUDT16 | hsa-miR-7016-3p |
| NUDT16 | hsa-miR-6886-3p |
| NUDT16 | hsa-miR-3928-5p |
| NUDT16 | hsa-miR-651     |
| NUDT16 | hsa-miR-3190-5p |
| NUDT16 | hsa-miR-514a-3p |
| NUDT16 | hsa-miR-211-5p  |
| NUDT16 | hsa-miR-223-5p  |
| NUDT16 | hsa-miR-137     |
| NUDT16 | hsa-miR-1296-5p |
| NUDT16 | hsa-miR-1193-5p |
| NUDT16 | hsa-miR-370-5p  |
| NUDT16 | hsa-miR-7078-3p |
| NUDT16 | hsa-miR-216b-3p |
| NUDT16 | hsa-miR-21-5p   |
| NUDT16 | hsa-miR-382-5p  |
| NUDT16 | hsa-miR-4252    |
| NUDT16 | hsa-miR-8834b   |
| NUDT16 | hsa-miR-34c-3p  |
| NUDT16 | hsa-miR-7074-5p |
| NUDT16 | hsa-miR-150-5p  |
| NUDT16 | hsa-miR-7664-5p |
| NUDT16 | hsa-miR-409-5p  |
| NUDT16 | hsa-miR-6803-5p |
| NUDT16 | hsa-let-7g-3p   |
| NUDT16 | hsa-miR-451a    |
| NUDT16 | hsa-miR-4742-3p |
| NUDT16 | hsa-miR-130b-5p |
| NUDT16 | hsa-miR-1915-3p |
| NUDT16 | hsa-miR-7081-5p |
| NUDT16 | hsa-miR-4514    |
| NUDT16 | hsa-miR-3074-5p |
| NUDT16 | hsa-miR-6949-3p |
| NUDT16 | hsa-miR-20      |
| NUDT16 | hsa-miR-920     |
| NUDT16 | hsa-miR-206     |
| NUDT16 | hsa-miR-7039-3p |
| NUDT16 | hsa-miR-506-5p  |

|        |                 |
|--------|-----------------|
| NUDT16 | hsa-miR-4718    |
| NUDT16 | hsa-miR-378g    |
| NUDT16 | hsa-miR-495-3p  |
| NUDT16 | hsa-miR-7198-5p |
| NUDT16 | hsa-miR-1962    |
| NUDT16 | hsa-miR-450-5p  |
| NUDT16 | hsa-miR-4799-3p |
| NUDT16 | hsa-miR-7211-3p |
| NUDT16 | hsa-miR-465d-3p |
| NUDT16 | hsa-miR-6852-5p |
| NUDT16 | hsa-miR-6997-5p |
| NUDT16 | hsa-miR-4763-3p |
| NUDT16 | hsa-miR-3099-3p |
| NUDT16 | hsa-miR-6817-5p |
| NUDT16 | hsa-miR-504     |
| NUDT16 | hsa-miR-149-3p  |
| NUDT16 | hsa-miR-643     |
| NUDT16 | hsa-miR-30a-3p  |
| NUDT16 | hsa-miR-6966-3p |
| NUDT16 | hsa-miR-592-5p  |
| NUDT16 | hsa-miR-1949    |
| NUDT16 | hsa-miR-7180-3p |
| NUDT16 | hsa-miR-6789-5p |
| NUDT16 | hsa-miR-4674    |
| NUDT16 | hsa-miR-18b-3p  |
| NUDT16 | hsa-miR-4803    |
| NUDT16 | hsa-miR-1285-5p |
| NUDT16 | hsa-miR-670-3p  |
| NUDT16 | hsa-miR-4677-3p |
| NUDT16 | hsa-miR-525-5p  |
| NUDT16 | hsa-miR-466g    |
| NUDT16 | hsa-miR-589-5p  |
| NUDT16 | hsa-miR-3103-3p |
| NUDT16 | hsa-miR-7050-5p |
| NUDT16 | hsa-miR-767-3p  |
| NUDT16 | hsa-miR-6366    |
| NUDT16 | hsa-miR-154-3p  |
| NUDT16 | hsa-miR-8843    |
| NUDT16 | hsa-miR-3160-5p |
| NUDT16 | hsa-miR-4724-3p |
| NUDT16 | hsa-miR-8900    |
| NUDT16 | hsa-miR-3938    |
| NUDT16 | hsa-miR-6964-3p |
| NUDT16 | hsa-miR-6086    |
| NUDT16 | hsa-miR-1271-3p |
| NUDT16 | hsa-miR-6758-3p |

|        |                   |
|--------|-------------------|
| NUDT16 | hsa-miR-491-5p    |
| NUDT16 | hsa-miR-4261      |
| NUDT16 | hsa-miR-3616-3p   |
| NUDT16 | hsa-miR-3936      |
| NUDT16 | hsa-miR-3173-5p   |
| NUDT16 | hsa-miR-432-5p    |
| NUDT16 | hsa-miR-550b-2-5p |
| NUDT16 | hsa-miR-6872-3p   |
| NUDT16 | hsa-miR-139-5p    |
| NUDT16 | hsa-miR-4797-3p   |
| NUDT16 | hsa-miR-6834-5p   |
| NUDT16 | hsa-miR-4434      |
| NUDT16 | hsa-miR-4448      |
| NUDT16 | hsa-miR-6724-5p   |
| NUDT16 | hsa-miR-30-5p     |
| NUDT16 | hsa-miR-6090      |
| NUDT16 | hsa-miR-17-5p     |
| NUDT16 | hsa-miR-6975-3p   |
| NUDT16 | hsa-miR-7157-3p   |
| NUDT16 | hsa-miR-151-3p    |
| NUDT16 | hsa-miR-5194      |
| NUDT16 | hsa-miR-127-5p    |
| NUDT16 | hsa-miR-873-3p    |
| NUDT16 | hsa-miR-4493      |
| NUDT16 | hsa-miR-7065-3p   |
| NUDT16 | hsa-miR-1243-5p   |
| NUDT16 | hsa-miR-34-5p     |
| NUDT16 | hsa-miR-520c-3p   |
| NUDT16 | hsa-miR-6944-5p   |
| NUDT16 | hsa-miR-299b-5p   |
| NUDT16 | hsa-miR-623       |
| NUDT16 | hsa-miR-1b-5p     |
| NUDT16 | hsa-miR-2183      |
| NUDT16 | hsa-miR-7079-5p   |
| NUDT16 | hsa-miR-872-5p    |
| NUDT16 | hsa-miR-7656-5p   |
| NUDT16 | hsa-miR-935       |
| NUDT16 | hsa-miR-8120      |
| NUDT16 | hsa-miR-3549      |
| NUDT16 | hsa-miR-301-5p    |
| NUDT16 | hsa-miR-140-5p    |
| NUDT16 | hsa-miR-555       |
| NUDT16 | hsa-miR-631       |
| NUDT16 | hsa-miR-7163-5p   |
| NUDT16 | hsa-miR-125-5p    |
| NUDT16 | hsa-miR-664a-3p   |

|        |                  |
|--------|------------------|
| NUDT16 | hsa-miR-335-5p   |
| NUDT16 | hsa-miR-526      |
| NUDT16 | hsa-miR-7212-3p  |
| NUDT16 | hsa-miR-890-5p   |
| NUDT16 | hsa-miR-153-3p   |
| NUDT16 | hsa-miR-592-3p   |
| NUDT16 | hsa-miR-8059     |
| NUDT16 | hsa-miR-6760-3p  |
| NUDT16 | hsa-miR-7227-5p  |
| NUDT16 | hsa-miR-6771-3p  |
| NUDT16 | hsa-miR-4313     |
| NUDT16 | hsa-miR-6881-3p  |
| NUDT16 | hsa-miR-577      |
| NUDT16 | hsa-miR-3679-3p  |
| NUDT16 | hsa-miR-1278     |
| NUDT16 | hsa-miR-874-3p   |
| NUDT16 | hsa-miR-374c-3p  |
| NUDT16 | hsa-miR-1291     |
| NUDT16 | hsa-miR-7153-3p  |
| NUDT16 | hsa-miR-550a-5p  |
| NUDT16 | hsa-miR-1273h-5p |
| NUDT16 | hsa-miR-7031-3p  |
| NUDT16 | hsa-miR-6791-5p  |
| NUDT16 | hsa-miR-1290     |
| NUDT16 | hsa-miR-448-3p   |
| NUDT16 | hsa-miR-548i-3p  |
| NUDT16 | hsa-miR-888-3p   |
| NUDT16 | hsa-miR-607      |
| NUDT16 | hsa-miR-141-5p   |
| NUDT16 | hsa-miR-188-3p   |
| NUDT16 | hsa-miR-651-3p   |
| NUDT16 | hsa-miR-1297     |
| NUDT16 | hsa-miR-3150b-5p |
| NUDT16 | hsa-miR-6529-3p  |
| NUDT16 | hsa-miR-223-3p   |
| NUDT16 | hsa-miR-677      |
| NUDT16 | hsa-miR-192-5p   |
| NUDT16 | hsa-miR-4635     |
| NUDT16 | hsa-miR-653-5p   |
| NUDT16 | hsa-miR-2467-5p  |
| NUDT16 | hsa-miR-4778-5p  |
| NUDT16 | hsa-miR-770-5p   |
| NUDT16 | hsa-miR-7005-3p  |
| NUDT16 | hsa-miR-6378     |
| NUDT16 | hsa-miR-4326     |
| NUDT16 | hsa-miR-4753-5p  |

|        |                   |
|--------|-------------------|
| NUDT16 | hsa-miR-493-5p    |
| NUDT16 | hsa-miR-7026-5p   |
| NUDT16 | hsa-miR-7237-5p   |
| NUDT16 | hsa-miR-704       |
| NUDT16 | hsa-miR-6822-3p   |
| NUDT16 | hsa-miR-761       |
| NUDT16 | hsa-miR-145-5p    |
| NUDT16 | hsa-miR-377-3p    |
| NUDT16 | hsa-miR-7078-5p   |
| NUDT16 | hsa-miR-3667-3p   |
| NUDT16 | hsa-miR-692       |
| NUDT16 | hsa-miR-514a-5p   |
| NUDT16 | hsa-miR-520-5p    |
| NUDT16 | hsa-miR-4470      |
| NUDT16 | hsa-miR-1287-5p   |
| NUDT16 | hsa-miR-466bcp-3p |
| NUDT16 | hsa-miR-4263      |
| NUDT16 | hsa-miR-3062-5p   |
| NUDT16 | hsa-miR-26-3p     |
| NUDT16 | hsa-miR-326       |
| NUDT16 | hsa-miR-4423-5p   |
| NUDT16 | hsa-miR-3127-3p   |
| NUDT16 | hsa-miR-7515      |
| NUDT16 | hsa-miR-634       |
| NUDT16 | hsa-miR-22-5p     |
| NUDT16 | hsa-miR-5579-5p   |
| NUDT16 | hsa-miR-2114-5p   |
| NUDT16 | hsa-miR-7112-3p   |
| NUDT16 | hsa-miR-4300      |
| NUDT16 | hsa-miR-939-3p    |
| NUDT16 | hsa-miR-6963-5p   |
| NUDT16 | hsa-miR-655-3p    |
| NUDT16 | hsa-miR-7977      |
| NUDT16 | hsa-miR-507       |
| NUDT16 | hsa-miR-8872      |
| NUDT16 | hsa-miR-6831-5p   |
| NUDT16 | hsa-miR-27a-5p    |
| NUDT16 | hsa-miR-8904a     |
| NUDT16 | hsa-miR-4765      |
| NUDT16 | hsa-miR-6132      |
| NUDT16 | hsa-miR-665       |
| NUDT16 | hsa-miR-187-5p    |
| NUDT16 | hsa-miR-5627-5p   |
| NUDT16 | hsa-miR-3064-3p   |
| NUDT16 | hsa-miR-877-5p    |
| NUDT16 | hsa-miR-6834-3p   |

|        |                  |
|--------|------------------|
| NUDT16 | hsa-miR-3098-5p  |
| NUDT16 | hsa-miR-129-5p   |
| NUDT16 | hsa-miR-1470     |
| NUDT16 | hsa-miR-934-3p   |
| NUDT16 | hsa-miR-3199     |
| NUDT16 | hsa-miR-4721     |
| NUDT16 | hsa-miR-5186     |
| NUDT16 | hsa-miR-4330     |
| NUDT16 | hsa-miR-6856-3p  |
| NUDT16 | hsa-miR-465-3p   |
| NUDT16 | hsa-miR-669b-5p  |
| NUDT16 | hsa-miR-4307     |
| NUDT16 | hsa-miR-5707     |
| NUDT16 | hsa-miR-3544     |
| NUDT16 | hsa-miR-6501-3p  |
| NUDT16 | hsa-miR-195-3p   |
| NUDT16 | hsa-miR-483-3p.1 |
| NUDT16 | hsa-miR-3944-5p  |
| NUDT16 | hsa-miR-4502     |
| NUDT16 | hsa-miR-650      |
| NUDT16 | hsa-miR-885-5p   |
| NUDT16 | hsa-miR-410-5p   |
| NUDT16 | hsa-miR-509-3p   |
| NUDT16 | hsa-miR-3920     |
| NUDT16 | hsa-miR-6755-5p  |
| NUDT16 | hsa-miR-1245b-3p |
| NUDT16 | hsa-miR-651-5p   |
| NUDT16 | hsa-miR-7032-5p  |
| NUDT16 | hsa-miR-1976     |
| NUDT16 | hsa-miR-1273d    |
| NUDT16 | hsa-miR-3076-5p  |
| NUDT16 | hsa-miR-3661     |
| NUDT16 | hsa-miR-659-3p   |
| NUDT16 | hsa-miR-543      |
| NUDT16 | hsa-miR-4732-5p  |
| NUDT16 | hsa-miR-4526     |
| NUDT16 | hsa-miR-612      |
| NUDT16 | hsa-miR-883-5p   |
| NUDT16 | hsa-miR-518-3p   |
| NUDT16 | hsa-miR-1292-5p  |
| NUDT16 | hsa-miR-4780     |
| NUDT16 | hsa-miR-7193-5p  |
| NUDT16 | hsa-miR-425-5p   |
| NUDT16 | hsa-miR-744-3p   |
| NUDT16 | hsa-miR-4640-5p  |
| NUDT16 | hsa-miR-7083-3p  |

|        |                  |
|--------|------------------|
| NUDT16 | hsa-miR-433-3p   |
| NUDT16 | hsa-miR-6857-5p  |
| NUDT16 | hsa-miR-4743-5p  |
| NUDT16 | hsa-miR-2370-5p  |
| NUDT16 | hsa-miR-4279     |
| NUDT16 | hsa-miR-879-5p   |
| NUDT16 | hsa-miR-217-5p   |
| NUDT16 | hsa-miR-3085     |
| NUDT16 | hsa-miR-5697-3p  |
| NUDT16 | hsa-miR-8070     |
| NUDT16 | hsa-miR-3065-3p  |
| NUDT16 | hsa-miR-1943-3p  |
| NUDT16 | hsa-miR-545-5p   |
| NUDT16 | hsa-miR-6082     |
| NUDT16 | hsa-miR-6893-5p  |
| NUDT16 | hsa-miR-2115-5p  |
| NUDT16 | hsa-miR-6839-5p  |
| NUDT16 | hsa-miR-409-3p   |
| NUDT16 | hsa-miR-3691-3p  |
| NUDT16 | hsa-miR-669k-5p  |
| NUDT16 | hsa-miR-3066-3p  |
| NUDT16 | hsa-miR-3116     |
| NUDT16 | hsa-miR-1178-5p  |
| NUDT16 | hsa-miR-1238-5p  |
| NUDT16 | hsa-miR-342-3p   |
| NUDT16 | hsa-miR-6908-5p  |
| NUDT16 | hsa-miR-4520-3p  |
| NUDT16 | hsa-miR-583      |
| NUDT16 | hsa-miR-8887     |
| NUDT16 | hsa-miR-1199-5p  |
| NUDT16 | hsa-miR-4478     |
| NUDT16 | hsa-miR-4474-5p  |
| NUDT16 | hsa-miR-544-3p   |
| NUDT16 | hsa-miR-6806-3p  |
| NUDT16 | hsa-miR-4477a    |
| NUDT16 | hsa-miR-5196-5p  |
| NUDT16 | hsa-miR-1193     |
| NUDT16 | hsa-miR-5590-5p  |
| NUDT16 | hsa-miR-6937-3p  |
| NUDT16 | hsa-miR-698-5p   |
| NUDT16 | hsa-miR-6848-3p  |
| NUDT16 | hsa-miR-7067-5p  |
| NUDT16 | hsa-miR-629-3p   |
| NUDT16 | hsa-miR-129-2-3p |
| NUDT16 | hsa-miR-155-5p   |
| NUDT16 | hsa-miR-335-5p   |



|        |                  |
|--------|------------------|
| NUDT16 | hsa-miR-4777-3p  |
| NUDT16 | hsa-miR-4518     |
| NUDT16 | hsa-miR-329-5p   |
| NUDT16 | hsa-miR-29b-2-5p |
| NUDT16 | hsa-miR-9b-3p    |
| NUDT16 | hsa-miR-4661-5p  |
| NUDT16 | hsa-miR-4722-5p  |
| NUDT16 | hsa-miR-200bc-3p |
| NUDT16 | hsa-miR-1-3p     |
| NUDT16 | hsa-miR-211-5p   |
| NUDT16 | hsa-miR-3943     |
| NUDT16 | hsa-miR-28-5p    |
| NUDT16 | hsa-miR-6919-3p  |
| NUDT16 | hsa-miR-7018-3p  |
| NUDT16 | hsa-miR-2355-5p  |
| NUDT16 | hsa-miR-1896     |
| NUDT16 | hsa-miR-661      |
| NUDT16 | hsa-miR-3680-3p  |
| NUDT16 | hsa-miR-8908c    |
| NUDT16 | hsa-miR-218-5p   |
| NUDT16 | hsa-miR-1266-3p  |
| NUDT16 | hsa-miR-7108-5p  |
| NUDT16 | hsa-miR-7062-5p  |
| NUDT16 | hsa-miR-7085-3p  |
| NUDT16 | hsa-miR-1942     |
| NUDT16 | hsa-miR-297      |
| NUDT16 | hsa-miR-7653-3p  |
| NUDT16 | hsa-miR-544a     |
| NUDT16 | hsa-miR-5703     |
| NUDT16 | hsa-miR-8840     |
| NUDT16 | hsa-miR-7687-5p  |
| NUDT16 | hsa-miR-6387     |
| NUDT16 | hsa-miR-7029-3p  |
| NUDT16 | hsa-miR-148a-5p  |
| NUDT16 | hsa-miR-4482-3p  |
| NUDT16 | hsa-miR-365-3p   |
| NUDT16 | hsa-miR-21-5p    |
| NUDT16 | hsa-miR-4265     |
| NUDT16 | hsa-miR-30c-2-3p |
| NUDT16 | hsa-miR-3087-5p  |
| NUDT16 | hsa-miR-6899-3p  |
| NUDT16 | hsa-miR-3938-5p  |
| NUDT16 | hsa-miR-570-3p   |
| NUDT16 | hsa-miR-558      |
| NUDT16 | hsa-miR-201-3p   |
| NUDT16 | hsa-miR-133b     |

|        |                   |
|--------|-------------------|
| NUDT16 | hsa-miR-4510      |
| NUDT16 | hsa-miR-3658      |
| NUDT16 | hsa-miR-1270      |
| NUDT16 | hsa-miR-1279      |
| NUDT16 | hsa-miR-302c-3p.2 |
| NUDT16 | hsa-miR-4294      |
| NUDT16 | hsa-miR-205-5p    |
| NUDT16 | hsa-miR-6854-5p   |
| NUDT16 | hsa-miR-496-5p    |
| NUDT16 | hsa-miR-7021-3p   |
| NUDT16 | hsa-miR-5195-5p   |
| NUDT16 | hsa-miR-186-3p    |
| NUDT16 | hsa-miR-5133      |
| NUDT16 | hsa-miR-2114-5p   |
| NUDT16 | hsa-miR-6925-3p   |
| NUDT16 | hsa-miR-3652      |
| NUDT16 | hsa-miR-4472      |
| NUDT16 | hsa-miR-7689-3p   |
| NUDT16 | hsa-miR-295-3p    |
| NUDT16 | hsa-miR-6953-3p   |
| NUDT16 | hsa-miR-1293      |
| NUDT16 | hsa-miR-1233-3p   |
| NUDT16 | hsa-miR-1964-5p   |
| NUDT16 | hsa-miR-8832      |
| NUDT16 | hsa-miR-143-3p    |
| NUDT16 | hsa-miR-670       |
| NUDT16 | hsa-miR-4444      |
| NUDT16 | hsa-miR-3090-3p   |
| NUDT16 | hsa-miR-216b      |
| NUDT16 | hsa-miR-7674-3p   |
| NUDT16 | hsa-miR-5110      |
| NUDT16 | hsa-miR-4653-3p   |
| NUDT16 | hsa-miR-1273g-3p  |
| NUDT16 | hsa-miR-6502-5p   |
| NUDT16 | hsa-miR-518g-3p   |
| NUDT16 | hsa-miR-3622a-3p  |
| NUDT16 | hsa-miR-4778-3p   |
| NUDT16 | hsa-miR-344a-3p   |
| NUDT16 | hsa-miR-27b-5p    |
| NUDT16 | hsa-miR-124-3p    |
| NUDT16 | hsa-miR-185-5p    |
| NUDT16 | hsa-miR-497-5p    |
| NUDT16 | hsa-miR-6514-3p   |
| NUDT16 | hsa-miR-6897-5p   |
| NUDT16 | hsa-miR-1910-5p   |
| NUDT16 | hsa-miR-299-3p    |

|        |                 |
|--------|-----------------|
| NUDT16 | hsa-miR-6776-5p |
| NUDT16 | hsa-miR-6124    |
| NUDT16 | hsa-miR-5693    |
| NUDT16 | hsa-miR-3617-3p |
| NUDT16 | hsa-miR-8054    |
| NUDT16 | hsa-miR-3200-3p |
| NUDT16 | hsa-miR-6365    |
| NUDT16 | hsa-miR-486-3p  |
| NUDT16 | hsa-miR-3653-5p |
| NUDT16 | hsa-miR-382-5p  |
| NUDT16 | hsa-miR-3169    |
| NUDT16 | hsa-miR-3106-5p |
| NUDT16 | hsa-miR-5618-3p |
| NUDT16 | hsa-miR-4689    |
| NUDT16 | hsa-miR-4297    |
| NUDT16 | hsa-miR-6416-3p |
| NUDT16 | hsa-miR-924     |
| NUDT16 | hsa-miR-6882-3p |
| NUDT16 | hsa-miR-539-5p  |
| NUDT16 | hsa-miR-370     |
| NUDT16 | hsa-miR-6940-5p |
| NUDT16 | hsa-miR-205-5p  |
| NUDT16 | hsa-miR-3686    |
| NUDT16 | hsa-miR-7194-5p |
| NUDT16 | hsa-miR-503-5p  |
| NUDT16 | hsa-miR-6737-3p |
| NUDT16 | hsa-miR-7578    |
| NUDT16 | hsa-miR-30e     |
| NUDT16 | hsa-miR-3130-5p |
| NUDT16 | hsa-miR-5700    |
| NUDT16 | hsa-miR-7852-3p |
| NUDT16 | hsa-miR-7227-3p |
| NUDT16 | hsa-miR-6129    |
| NUDT16 | hsa-miR-4471    |
| NUDT16 | hsa-miR-5706    |
| NUDT16 | hsa-miR-92a-5p  |
| NUDT16 | hsa-miR-338-3p  |
| NUDT16 | hsa-miR-4762-3p |
| NUDT16 | hsa-miR-146     |
| NUDT16 | hsa-miR-657     |
| NUDT16 | hsa-miR-4742-5p |
| NUDT16 | hsa-miR-2117    |
| NUDT16 | hsa-miR-3909    |
| NUDT16 | hsa-miR-4753-3p |
| NUDT16 | hsa-miR-8824    |
| NUDT16 | hsa-miR-2276-5p |

|        |                   |
|--------|-------------------|
| NUDT16 | hsa-miR-877-3p    |
| NUDT16 | hsa-miR-216-5p    |
| NUDT16 | hsa-miR-103b      |
| NUDT16 | hsa-miR-6875-3p   |
| NUDT16 | hsa-miR-7181-5p   |
| NUDT16 | hsa-miR-4646-5p   |
| NUDT16 | hsa-miR-1904      |
| NUDT16 | hsa-miR-140-3p.1  |
| NUDT16 | hsa-miR-7704      |
| NUDT16 | hsa-miR-4481      |
| NUDT16 | hsa-miR-196b-3p   |
| NUDT16 | hsa-miR-7180      |
| NUDT16 | hsa-miR-216       |
| NUDT16 | hsa-miR-344g-3p   |
| NUDT16 | hsa-miR-6997-3p   |
| NUDT16 | hsa-miR-6954-3p   |
| NUDT16 | hsa-miR-653-3p    |
| NUDT16 | hsa-miR-3192-3p   |
| NUDT16 | hsa-miR-3160-3p   |
| NUDT16 | hsa-miR-513a      |
| NUDT16 | hsa-miR-1966-3p   |
| NUDT16 | hsa-miR-470-5p    |
| NUDT16 | hsa-miR-7022-3p   |
| NUDT16 | hsa-miR-372-5p    |
| NUDT16 | hsa-miR-6133      |
| NUDT16 | hsa-miR-8846      |
| NUDT16 | hsa-miR-4266      |
| NUDT16 | hsa-miR-1231      |
| NUDT16 | hsa-miR-5626-5p   |
| NUDT16 | hsa-miR-881-5p    |
| NUDT16 | hsa-miR-5622-5p   |
| NUDT16 | hsa-miR-7662-5p   |
| NUDT16 | hsa-miR-3650      |
| NUDT16 | hsa-miR-6902-5p   |
| NUDT16 | hsa-miR-449b-3p   |
| NUDT16 | hsa-miR-4513      |
| NUDT16 | hsa-miR-138-3p    |
| NUDT16 | hsa-miR-4487      |
| NUDT16 | hsa-miR-3917      |
| NUDT16 | hsa-miR-6796-3p   |
| NUDT16 | hsa-miR-5787      |
| NUDT16 | hsa-miR-548m      |
| NUDT16 | hsa-miR-6960-3p   |
| NUDT16 | hsa-miR-450a-2-3p |
| NUDT16 | hsa-miR-1970      |
| NUDT16 | hsa-miR-8807      |

|        |                   |
|--------|-------------------|
| NUDT16 | hsa-miR-4468      |
| NUDT16 | hsa-miR-5113      |
| NUDT16 | hsa-miR-1250-3p   |
| NUDT16 | hsa-miR-4296      |
| NUDT16 | hsa-miR-125b-2-3p |
| NUDT16 | hsa-miR-3922-3p   |
| NUDT16 | hsa-miR-5684      |
| NUDT16 | hsa-miR-878-3p    |
| NUDT16 | hsa-miR-6835-5p   |
| NUDT16 | hsa-miR-6971-3p   |
| NUDT16 | hsa-miR-489       |
| NUDT16 | hsa-miR-4777-5p   |
| NUDT16 | hsa-miR-130       |
| NUDT16 | hsa-miR-1909-5p   |
| NUDT16 | hsa-miR-485-5p    |
| NUDT16 | hsa-miR-3606-5p   |
| NUDT16 | hsa-miR-30b-3p    |
| NUDT16 | hsa-miR-3470a     |
| NUDT16 | hsa-miR-1246      |
| NUDT16 | hsa-miR-4482-5p   |
| NUDT16 | hsa-miR-494       |
| NUDT16 | hsa-miR-7681-5p   |
| NUDT16 | hsa-miR-760       |
| NUDT16 | hsa-miR-3191-5p   |
| NUDT16 | hsa-miR-7657-3p   |
| NUDT16 | hsa-miR-5099      |
| NUDT16 | hsa-miR-4650      |
| NUDT16 | hsa-miR-6961-3p   |
| NUDT16 | hsa-miR-7033-5p   |
| NUDT16 | hsa-miR-4515      |
| NUDT16 | hsa-miR-6321      |
| NUDT16 | hsa-miR-4755-3p   |
| NUDT16 | hsa-miR-1261      |
| NUDT16 | hsa-miR-147a      |
| NUDT16 | hsa-miR-6729-3p   |
| NUDT16 | hsa-miR-3058-3p   |
| NUDT16 | hsa-miR-218-2-3p  |
| NUDT16 | hsa-miR-1-5p      |
| NUDT16 | hsa-miR-448       |
| NUDT16 | hsa-miR-4743-5p   |
| NUDT16 | hsa-miR-320e      |
| NUDT16 | hsa-miR-142-3p.2  |
| NUDT16 | hsa-miR-573       |
| NUDT16 | hsa-miR-6715b-5p  |
| NUDT16 | hsa-miR-1269a     |
| NUDT16 | hsa-miR-134-5p    |

|        |                  |
|--------|------------------|
| NUDT16 | hsa-miR-5189-3p  |
| NUDT16 | hsa-miR-126-3p   |
| NUDT16 | hsa-miR-4274     |
| NUDT16 | hsa-miR-3577     |
| NUDT16 | hsa-miR-8550     |
| NUDT16 | hsa-miR-186-5p   |
| NUDT16 | hsa-miR-3127-5p  |
| NUDT16 | hsa-miR-7196-5p  |
| NUDT16 | hsa-miR-6859-5p  |
| NUDT16 | hsa-miR-6998-5p  |
| NUDT16 | hsa-miR-579      |
| NUDT16 | hsa-miR-1231-3p  |
| NUDT16 | hsa-miR-2113     |
| NUDT16 | hsa-miR-153-5p   |
| NUDT16 | hsa-miR-3941     |
| NUDT16 | hsa-miR-2483     |
| NUDT16 | hsa-miR-590-5p   |
| NUDT16 | hsa-miR-1183     |
| NUDT16 | hsa-miR-764-5p   |
| NUDT16 | hsa-miR-6764-3p  |
| NUDT16 | hsa-miR-7702     |
| NUDT16 | hsa-miR-3073b-3p |
| NUDT16 | hsa-miR-3552     |
| NUDT16 | hsa-miR-203-3p.1 |
| NUDT16 | hsa-miR-552-3p   |
| NUDT16 | hsa-miR-3192-5p  |
| NUDT16 | hsa-miR-219a-5p  |
| NUDT16 | hsa-miR-1225-3p  |
| NUDT16 | hsa-miR-615-5p   |
| NUDT16 | hsa-miR-7200-5p  |
| NUDT16 | hsa-miR-7663-3p  |
| NUDT16 | hsa-miR-6511a-5p |
| NUDT16 | hsa-miR-486-5p   |
| NUDT16 | hsa-miR-3557-3p  |
| NUDT16 | hsa-miR-3935     |
| NUDT16 | hsa-miR-1952     |
| NUDT16 | hsa-miR-466l-5p  |
| NUDT16 | hsa-miR-4694-5p  |
| NUDT16 | hsa-miR-6507-3p  |
| NUDT16 | hsa-miR-327      |
| NUDT16 | hsa-miR-2378     |
| NUDT16 | hsa-miR-6128     |
| NUDT16 | hsa-miR-223-3p   |
| NUDT16 | hsa-miR-6769a-3p |
| NUDT16 | hsa-miR-7178-5p  |
| NUDT16 | hsa-miR-8899     |

|        |                  |
|--------|------------------|
| NUDT16 | hsa-miR-124-3p.1 |
| NUDT16 | hsa-miR-7211-5p  |
| NUDT16 | hsa-miR-155-5p   |
| NUDT16 | hsa-miR-518d-5p  |
| NUDT16 | hsa-miR-1838     |
| NUDT16 | hsa-miR-7199-3p  |
| NUDT16 | hsa-miR-766-3p   |
| NUDT16 | hsa-miR-1260b    |
| NUDT16 | hsa-miR-512      |
| NUDT16 | hsa-miR-508-3p   |
| NUDT16 | hsa-miR-190-5p   |
| NUDT16 | hsa-miR-1260a    |
| NUDT16 | hsa-miR-1938     |
| NUDT16 | hsa-miR-33a-3p   |
| NUDT16 | hsa-miR-7049-5p  |
| NUDT16 | hsa-miR-106      |
| NUDT16 | hsa-miR-6742-5p  |
| NUDT16 | hsa-miR-4251     |
| NUDT16 | hsa-miR-2298     |
| NUDT16 | hsa-miR-6900-5p  |
| NUDT16 | hsa-miR-4776-3p  |
| NUDT16 | hsa-miR-6087     |
| NUDT16 | hsa-miR-103-3p   |
| NUDT16 | hsa-miR-8085     |
| NUDT16 | hsa-miR-5685     |
| NUDT16 | hsa-miR-7090-5p  |
| NUDT16 | hsa-miR-143-5p   |
| NUDT16 | hsa-miR-29       |
| NUDT16 | hsa-miR-7033-3p  |
| NUDT16 | hsa-miR-7043-5p  |
| NUDT16 | hsa-miR-221-5p   |
| NUDT16 | hsa-miR-922      |
| NUDT16 | hsa-miR-200c-3p  |
| NUDT16 | hsa-miR-4530     |
| NUDT16 | hsa-miR-411-3p   |
| NUDT16 | hsa-miR-4461     |
| NUDT16 | hsa-miR-6842-5p  |
| NUDT16 | hsa-miR-4421     |
| NUDT16 | hsa-miR-518-5p   |
| NUDT16 | hsa-miR-93-3p    |
| NUDT16 | hsa-miR-664      |
| NUDT16 | hsa-miR-2285aa   |
| NUDT16 | hsa-miR-548t-5p  |
| NUDT16 | hsa-miR-7011-3p  |
| NUDT16 | hsa-miR-7173-5p  |
| NUDT16 | hsa-miR-6813-5p  |

|        |                   |
|--------|-------------------|
| NUDT16 | hsa-miR-6756-3p   |
| NUDT16 | hsa-miR-1295b-5p  |
| NUDT16 | hsa-miR-665-3p    |
| NUDT16 | hsa-miR-7187-3p   |
| NUDT16 | hsa-miR-3059-5p   |
| NUDT16 | hsa-miR-4430      |
| NUDT16 | hsa-miR-593-3p    |
| NUDT16 | hsa-miR-1587      |
| NUDT16 | hsa-miR-150-5p    |
| NUDT16 | hsa-miR-29a-3p    |
| NUDT16 | hsa-miR-7081-3p   |
| NUDT16 | hsa-miR-490-5p    |
| NUDT16 | hsa-miR-3934-3p   |
| NUDT16 | hsa-miR-3058-5p   |
| NUDT16 | hsa-miR-3685      |
| NUDT16 | hsa-miR-664b-5p   |
| NUDT16 | hsa-miR-4524-5p   |
| NUDT16 | hsa-miR-6363      |
| NUDT16 | hsa-miR-762       |
| NUDT16 | hsa-miR-7156-3p   |
| NUDT16 | hsa-miR-3085-3p   |
| NUDT16 | hsa-miR-466n-5p   |
| NUDT16 | hsa-miR-7179-3p   |
| NUDT16 | hsa-miR-7975      |
| NUDT16 | hsa-miR-5699-3p   |
| NUDT16 | hsa-miR-1266      |
| NUDT16 | hsa-miR-6996-3p   |
| NUDT16 | hsa-miR-3162-5p   |
| NUDT16 | hsa-miR-27-3p     |
| NUDT16 | hsa-miR-8113      |
| NUDT16 | hsa-miR-6762-5p   |
| NUDT16 | hsa-miR-6379      |
| NUDT16 | hsa-miR-590-5p    |
| NUDT16 | hsa-miR-6821-3p   |
| NUDT16 | hsa-miR-8841      |
| NUDT16 | hsa-miR-3162-3p   |
| NUDT16 | hsa-miR-548s      |
| NUDT16 | hsa-miR-5100      |
| NUDT16 | hsa-miR-3967      |
| NUDT16 | hsa-miR-373-3p    |
| NUDT16 | hsa-miR-181b-1-3p |
| NUDT16 | hsa-miR-199-5p    |
| NUDT16 | hsa-miR-3475-3p   |
| NUDT16 | hsa-miR-7053-3p   |
| NUDT16 | hsa-miR-450b-3p   |
| NUDT16 | hsa-miR-709       |



|        |                 |
|--------|-----------------|
| NUDT16 | hsa-miR-2392    |
| NUDT16 | hsa-miR-7074-3p |
| NUDT16 | hsa-miR-5571-3p |
| NUDT16 | hsa-miR-6894-3p |
| NUDT16 | hsa-miR-1911-3p |
| NUDT16 | hsa-miR-103-5p  |
| NUDT16 | hsa-miR-1180-5p |
| NUDT16 | hsa-miR-494-5p  |
| NUDT16 | hsa-miR-6759-5p |
| NUDT16 | hsa-miR-6811-3p |
| NUDT16 | hsa-miR-4277    |
| NUDT16 | hsa-miR-7162-3p |
| NUDT16 | hsa-miR-4509    |
| NUDT16 | hsa-miR-3593-5p |
| NUDT16 | hsa-miR-6736-3p |
| NUDT16 | hsa-miR-28-5p   |
| NUDT16 | hsa-miR-3155a   |
| NUDT16 | hsa-miR-3912-5p |
| NUDT16 | hsa-miR-4695-3p |
| NUDT16 | hsa-miR-3167-3p |
| NUDT16 | hsa-miR-3188    |
| NUDT16 | hsa-miR-32-3p   |
| NUDT16 | hsa-miR-509-5p  |
| NUDT16 | hsa-miR-1205    |
| NUDT16 | hsa-miR-613     |
| NUDT16 | hsa-miR-7661-5p |
| NUDT16 | hsa-miR-875-3p  |
| NUDT16 | hsa-miR-6833-5p |
| NUDT16 | hsa-miR-524-5p  |
| NUDT16 | hsa-miR-3091-5p |
| NUDT16 | hsa-miR-642     |
| NUDT16 | hsa-miR-4720-5p |
| NUDT16 | hsa-miR-2331-3p |
| NUDT16 | hsa-miR-5683    |
| NUDT16 | hsa-miR-4328    |
| NUDT16 | hsa-miR-4288    |
| NUDT16 | hsa-miR-8875    |
| NUDT16 | hsa-miR-194-3p  |
| NUDT16 | hsa-miR-4491    |
| NUDT16 | hsa-miR-3613-5p |
| NUDT16 | hsa-miR-193b-5p |
| NUDT16 | hsa-miR-7691    |
| NUDT16 | hsa-miR-344f-3p |
| NUDT16 | hsa-miR-499-5p  |
| NUDT16 | hsa-miR-6972-5p |
| NUDT16 | hsa-miR-489-5p  |

|        |                 |
|--------|-----------------|
| NUDT16 | hsa-miR-4745-5p |
| NUDT16 | hsa-miR-3182    |
| NUDT16 | hsa-miR-200a-3p |
| NUDT16 | hsa-miR-7077-5p |
| NUDT16 | hsa-miR-4323    |
| NUDT16 | hsa-miR-4755-5p |
| NUDT16 | hsa-let-7a-2-3p |
| NUDT16 | hsa-miR-122-5p  |
| NUDT16 | hsa-miR-149-5p  |
| NUDT16 | hsa-let-7c-3p   |
| NUDT16 | hsa-miR-195-5p  |
| NUDT16 | hsa-miR-5615-3p |
| NUDT16 | hsa-miR-6752-3p |
| NUDT16 | hsa-miR-4687-5p |
| NUDT16 | hsa-miR-557     |
| NUDT16 | hsa-miR-654-3p  |
| NUDT16 | hsa-miR-6747-3p |
| NUDT16 | hsa-miR-3202    |
| NUDT16 | hsa-miR-4758-3p |
| NUDT16 | hsa-miR-7043-3p |
| NUDT16 | hsa-miR-7169-3p |
| NUDT16 | hsa-miR-4255    |
| NUDT16 | hsa-miR-301b-5p |
| NUDT16 | hsa-miR-143-3p  |
| NUDT16 | hsa-miR-6734-3p |
| NUDT16 | hsa-miR-2052    |
| NUDT16 | hsa-miR-3572-3p |
| NUDT16 | hsa-miR-7183-5p |
| NUDT16 | hsa-miR-7051-3p |
| NUDT16 | hsa-miR-483-3p  |
| NUDT16 | hsa-miR-1827    |
| NUDT16 | hsa-miR-7641    |
| NUDT16 | hsa-miR-3075    |
| NUDT16 | hsa-miR-940     |
| NUDT16 | hsa-miR-3616-5p |
| NUDT16 | hsa-miR-675-3p  |
| NUDT16 | hsa-miR-208-3p  |
| NUDT16 | hsa-miR-4437    |
| NUDT16 | hsa-miR-6783-5p |
| NUDT16 | hsa-miR-6751-3p |
| NUDT16 | hsa-miR-487a-3p |
| NUDT16 | hsa-miR-4447    |
| NUDT16 | hsa-miR-3620-5p |
| NUDT16 | hsa-miR-154-5p  |
| NUDT16 | hsa-miR-2355-3p |
| NUDT16 | hsa-miR-371     |

|        |                  |
|--------|------------------|
| NUDT16 | hsa-miR-7687-3p  |
| NUDT16 | hsa-miR-7069-3p  |
| NUDT16 | hsa-miR-329-3p   |
| NUDT16 | hsa-miR-5088-3p  |
| NUDT16 | hsa-miR-593-3p   |
| NUDT16 | hsa-miR-702-3p   |
| NUDT16 | hsa-miR-7652-5p  |
| NUDT16 | hsa-miR-6825-5p  |
| NUDT16 | hsa-miR-6903-3p  |
| NUDT16 | hsa-miR-1914-5p  |
| NUDT16 | hsa-miR-516b     |
| NUDT16 | hsa-miR-6546-5p  |
| NUDT16 | hsa-miR-5107-5p  |
| NUDT16 | hsa-miR-6772-3p  |
| NUDT16 | hsa-miR-3557-5p  |
| NUDT16 | hsa-miR-3473be   |
| NUDT16 | hsa-miR-7160-5p  |
| NUDT16 | hsa-miR-466q     |
| NUDT16 | hsa-miR-6769b-5p |
| NUDT16 | hsa-miR-337-3p   |
| NUDT16 | hsa-miR-4675     |
| NUDT16 | hsa-miR-4257     |
| NUDT16 | hsa-miR-182-3p   |
| NUDT16 | hsa-miR-218-1-3p |
| NUDT16 | hsa-miR-512-3p   |
| NUDT16 | hsa-miR-6773-5p  |
| NUDT16 | hsa-miR-4438     |
| NUDT16 | hsa-miR-3140-5p  |
| NUDT16 | hsa-miR-4273     |
| NUDT16 | hsa-miR-377-3p   |
| NUDT16 | hsa-miR-1343     |
| NUDT16 | hsa-miR-374b-3p  |
| NUDT16 | hsa-miR-802-5p   |
| NUDT16 | hsa-miR-5621-5p  |
| NUDT16 | hsa-miR-3916     |
| NUDT16 | hsa-miR-1225     |
| NUDT16 | hsa-miR-1301-5p  |
| NUDT16 | hsa-miR-6809-3p  |
| NUDT16 | hsa-miR-3678-3p  |
| NUDT16 | hsa-miR-7242-5p  |
| NUDT16 | hsa-miR-24-3p    |
| NUDT16 | hsa-miR-7048-3p  |
| NUDT16 | hsa-miR-3971     |
| NUDT16 | hsa-miR-1249-3p  |
| NUDT16 | hsa-miR-584-5p   |
| NUDT16 | hsa-miR-8881     |

|        |                  |
|--------|------------------|
| NUDT16 | hsa-miR-3084-3p  |
| NUDT16 | hsa-miR-6778-5p  |
| NUDT16 | hsa-miR-140-3p   |
| NUDT16 | hsa-miR-5108     |
| NUDT16 | hsa-miR-921      |
| NUDT16 | hsa-miR-302c-5p  |
| NUDT16 | hsa-miR-4638-3p  |
| NUDT16 | hsa-miR-6968-5p  |
| NUDT16 | hsa-miR-7172-5p  |
| NUDT16 | hsa-miR-6515-5p  |
| NUDT16 | hsa-miR-5682     |
| NUDT16 | hsa-miR-4642     |
| NUDT16 | hsa-miR-4646-3p  |
| NUDT16 | hsa-miR-148-5p   |
| NUDT16 | hsa-miR-767-5p   |
| NUDT16 | hsa-miR-203b-5p  |
| NUDT16 | hsa-miR-4774-3p  |
| NUDT16 | hsa-miR-548aef   |
| NUDT16 | hsa-miR-6936-5p  |
| NUDT16 | hsa-miR-4329     |
| NUDT16 | hsa-miR-6920-3p  |
| NUDT16 | hsa-miR-1927     |
| NUDT16 | hsa-miR-8823     |
| NUDT16 | hsa-miR-3922-5p  |
| NUDT16 | hsa-miR-3546     |
| NUDT16 | hsa-miR-619-5p   |
| NUDT16 | hsa-miR-4666b    |
| NUDT16 | hsa-miR-1248     |
| NUDT16 | hsa-miR-138-2-3p |
| NUDT16 | hsa-miR-3083-5p  |
| NUDT16 | hsa-miR-6537-3p  |
| NUDT16 | hsa-miR-550-5p   |
| NUDT16 | hsa-miR-6762-3p  |
| NUDT16 | hsa-miR-6827-5p  |
| NUDT16 | hsa-miR-221-3p   |
| NUDT16 | hsa-miR-8802     |
| NUDT16 | hsa-miR-6909-3p  |
| NUDT16 | hsa-miR-3130-3p  |
| NUDT16 | hsa-miR-6165     |
| NUDT16 | hsa-miR-452-3p   |
| NUDT16 | hsa-miR-373-5p   |
| NUDT16 | hsa-miR-654-5p   |
| NUDT16 | hsa-miR-4782-5p  |
| NUDT16 | hsa-miR-455-5p   |
| NUDT16 | hsa-miR-4659a-5p |
| NUDT16 | hsa-miR-4772-5p  |

|        |                  |
|--------|------------------|
| NUDT16 | hsa-miR-516-3p   |
| NUDT16 | hsa-miR-6973b-3p |
| NUDT16 | hsa-miR-2464-5p  |
| NUDT16 | hsa-miR-544-5p   |
| NUDT16 | hsa-miR-3179     |
| NUDT16 | hsa-miR-7028-5p  |
| NUDT16 | hsa-miR-6917-3p  |
| NUDT16 | hsa-miR-1304-3p  |
| NUDT16 | hsa-miR-4667     |
| NUDT16 | hsa-miR-4713-5p  |
| NUDT16 | hsa-miR-7705     |
| NUDT16 | hsa-miR-30c-3p   |
| NUDT16 | hsa-miR-202-3p   |
| NUDT16 | hsa-miR-4496     |
| NUDT16 | hsa-miR-7228-3p  |
| NUDT16 | hsa-miR-3150a-3p |
| NUDT16 | hsa-miR-5009-3p  |
| NUDT16 | hsa-miR-7039-5p  |
| NUDT16 | hsa-miR-7188-3p  |
| NUDT16 | hsa-miR-6531     |
| NUDT16 | hsa-miR-6400     |
| NUDT16 | hsa-miR-548e-5p  |
| NUDT16 | hsa-miR-7181-3p  |
| NUDT16 | hsa-miR-1323-3p  |
| NUDT16 | hsa-miR-539-5p   |
| NUDT16 | hsa-miR-184      |
| NUDT16 | hsa-miR-8862     |
| NUDT16 | hsa-miR-6948-3p  |
| NUDT16 | hsa-miR-591      |
| NUDT16 | hsa-miR-871-3p   |
| NUDT16 | hsa-miR-513b-5p  |
| NUDT16 | hsa-miR-300      |
| NUDT16 | hsa-miR-7192-5p  |
| NUDT16 | hsa-miR-373-3p   |
| NUDT16 | hsa-miR-662      |
| NUDT16 | hsa-miR-3907     |
| NUDT16 | hsa-miR-7022-5p  |
| NUDT16 | hsa-miR-622      |
| NUDT16 | hsa-miR-7028-3p  |
| NUDT16 | hsa-miR-8810     |
| NUDT16 | hsa-miR-3586-3p  |
| NUDT16 | hsa-miR-8877     |
| NUDT16 | hsa-miR-509-3p   |
| NUDT16 | hsa-miR-3117-3p  |
| NUDT16 | hsa-miR-3167-5p  |
| NUDT16 | hsa-miR-200ab-5p |

|        |                  |
|--------|------------------|
| NUDT16 | hsa-miR-331-3p   |
| NUDT16 | hsa-miR-7158-5p  |
| NUDT16 | hsa-miR-7063-3p  |
| NUDT16 | hsa-miR-1249-3p  |
| NUDT16 | hsa-miR-4324     |
| NUDT16 | hsa-miR-6861-5p  |
| NUDT16 | hsa-miR-7239-5p  |
| NUDT16 | hsa-miR-642b-5p  |
| NUDT16 | hsa-miR-628-3p   |
| NUDT16 | hsa-miR-6505-5p  |
| NUDT16 | hsa-miR-3093-5p  |
| NUDT16 | hsa-let-7        |
| NUDT16 | hsa-miR-6911-3p  |
| NUDT16 | hsa-miR-7151-3p  |
| NUDT16 | hsa-miR-4728-5p  |
| NUDT16 | hsa-miR-6810-3p  |
| NUDT16 | hsa-miR-6516-3p  |
| NUDT16 | hsa-miR-4651     |
| NUDT16 | hsa-miR-3185     |
| NUDT16 | hsa-miR-4433b-3p |
| NUDT16 | hsa-miR-7667-5p  |
| NUDT16 | hsa-miR-6506-5p  |
| NUDT16 | hsa-miR-7219-5p  |
| NUDT16 | hsa-miR-4735-5p  |
| NUDT16 | hsa-miR-4688     |
| NUDT16 | hsa-miR-7222-5p  |
| NUDT16 | hsa-miR-200-3p   |
| NUDT16 | hsa-miR-195-5p   |
| NUDT16 | hsa-miR-6354     |
| NUDT16 | hsa-miR-153      |
| NUDT16 | hsa-miR-497-5p   |
| NUDT16 | hsa-miR-1283a    |
| NUDT16 | hsa-miR-344c-3p  |
| NUDT16 | hsa-miR-6726-5p  |
| NUDT16 | hsa-miR-6980-5p  |
| NUDT16 | hsa-miR-516b-5p  |
| NUDT16 | hsa-miR-548q     |
| NUDT16 | hsa-miR-19-3p    |
| NUDT16 | hsa-miR-6080     |
| NUDT16 | hsa-miR-6868-5p  |
| NUDT16 | hsa-miR-1229-3p  |
| NUDT16 | hsa-miR-4685-3p  |
| NUDT16 | hsa-miR-6918-5p  |
| NUDT16 | hsa-miR-4305     |
| NUDT16 | hsa-miR-3128     |
| NUDT16 | hsa-miR-300-3p   |

|        |                   |
|--------|-------------------|
| NUDT16 | hsa-miR-203       |
| NUDT16 | hsa-miR-939-5p    |
| NUDT16 | hsa-miR-6947-3p   |
| NUDT16 | hsa-miR-379-5p    |
| NUDT16 | hsa-miR-8092      |
| NUDT16 | hsa-miR-212-3p    |
| NUDT16 | hsa-miR-4264      |
| NUDT16 | hsa-miR-577-3p    |
| NUDT16 | hsa-miR-4660      |
| NUDT16 | hsa-miR-324-5p    |
| NUDT16 | hsa-miR-292b-3p   |
| NUDT16 | hsa-miR-4733-5p   |
| NUDT16 | hsa-miR-7119-5p   |
| NUDT16 | hsa-miR-4469      |
| NUDT16 | hsa-miR-2284-5p   |
| NUDT16 | hsa-miR-8867      |
| NUDT16 | hsa-miR-4749-3p   |
| NUDT16 | hsa-miR-9500      |
| NUDT16 | hsa-miR-3136-5p   |
| NUDT16 | hsa-miR-769-5p    |
| NUDT16 | hsa-miR-3714      |
| NUDT16 | hsa-miR-6508-3p   |
| NUDT16 | hsa-miR-217-3p    |
| NUDT16 | hsa-miR-346       |
| NUDT16 | hsa-miR-210-5p    |
| NUDT16 | hsa-miR-648       |
| NUDT16 | hsa-miR-3074-2-3p |
| NUDT16 | hsa-miR-154a      |
| NUDT16 | hsa-miR-520-3p    |
| NUDT16 | hsa-miR-1237-3p   |
| NUDT16 | hsa-miR-3972      |
| NUDT16 | hsa-miR-763       |
| NUDT16 | hsa-miR-673-5p    |
| NUDT16 | hsa-miR-8794      |
| NUDT16 | hsa-miR-7162-5p   |
| NUDT16 | hsa-miR-500-5p    |
| NUDT16 | hsa-miR-7856-5p   |
| NUDT16 | hsa-miR-8485      |
| NUDT16 | hsa-miR-448-5p    |
| NUDT16 | hsa-miR-26a-3p    |
| NUDT16 | hsa-miR-3151      |
| NUDT16 | hsa-miR-6780a-5p  |
| NUDT16 | hsa-let-7ag-3p    |
| NUDT16 | hsa-miR-892a      |
| NUDT16 | hsa-miR-3622b-5p  |
| NUDT16 | hsa-miR-7155-5p   |

|        |                   |
|--------|-------------------|
| NUDT16 | hsa-miR-18a-3p    |
| NUDT16 | hsa-miR-328-5p    |
| NUDT16 | hsa-miR-330-5p    |
| NUDT16 | hsa-miR-6788-5p   |
| NUDT16 | hsa-miR-371b-5p   |
| NUDT16 | hsa-miR-376a-1-5p |
| NUDT16 | hsa-miR-19a-5p    |
| NUDT16 | hsa-miR-1227-3p   |
| NUDT16 | hsa-miR-6715b-3p  |
| NUDT16 | hsa-miR-2114-3p   |
| NUDT16 | hsa-miR-5699-5p   |
| NUDT16 | hsa-miR-6908-3p   |
| NUDT16 | hsa-miR-7053-5p   |
| NUDT16 | hsa-miR-3143      |
| NUDT16 | hsa-miR-5046      |
| NUDT16 | hsa-miR-125       |
| NUDT16 | hsa-miR-423-5p    |
| NUDT16 | hsa-miR-1296-3p   |
| NUDT16 | hsa-miR-5581-5p   |
| NUDT16 | hsa-miR-34a-3p    |
| NUDT16 | hsa-miR-1841      |
| NUDT16 | hsa-miR-1262-5p   |
| NUDT16 | hsa-miR-8891      |
| NUDT16 | hsa-miR-16-5p     |
| NUDT16 | hsa-miR-766-5p    |
| NUDT16 | hsa-miR-875       |
| NUDT16 | hsa-miR-322-3p    |
| NUDT16 | hsa-miR-6769b-3p  |
| NUDT16 | hsa-miR-3163      |
| NUDT16 | hsa-miR-6072      |
| NUDT16 | hsa-miR-496       |
| NUDT16 | hsa-miR-106a-3p   |
| NUDT16 | hsa-miR-4664-3p   |
| NUDT16 | hsa-miR-663b      |
| NUDT16 | hsa-miR-4696      |
| NUDT16 | hsa-miR-619-3p    |
| NUDT16 | hsa-miR-548       |
| NUDT16 | hsa-miR-5691      |
| NUDT16 | hsa-miR-3200-3p   |
| NUDT16 | hsa-miR-4419a     |
| NUDT16 | hsa-miR-6808-5p   |
| NUDT16 | hsa-miR-3075-5p   |
| NUDT16 | hsa-miR-572       |
| NUDT16 | hsa-miR-548g-5p   |
| NUDT16 | hsa-miR-22-3p     |
| NUDT16 | hsa-miR-344-3p    |



|        |                   |
|--------|-------------------|
| NUDT16 | hsa-miR-7207-3p   |
| NUDT16 | hsa-miR-4769-5p   |
| NUDT16 | hsa-miR-6812-5p   |
| NUDT16 | hsa-miR-3150b-3p  |
| NUDT16 | hsa-miR-2426      |
| NUDT16 | hsa-miR-3091-3p   |
| NUDT16 | hsa-miR-6858-3p   |
| NUDT16 | hsa-miR-1182      |
| NUDT16 | hsa-miR-101-3p.1  |
| NUDT16 | hsa-miR-4667-3p   |
| NUDT16 | hsa-miR-1298-5p   |
| NUDT16 | hsa-miR-374       |
| NUDT16 | hsa-miR-8848      |
| NUDT16 | hsa-miR-567       |
| NUDT16 | hsa-miR-5571-5p   |
| NUDT16 | hsa-miR-224-5p    |
| NUDT16 | hsa-miR-3927-3p   |
| NUDT16 | hsa-miR-6785-5p   |
| NUDT16 | hsa-miR-1912-5p   |
| NUDT16 | hsa-miR-4420      |
| NUDT16 | hsa-miR-3572-5p   |
| NUDT16 | hsa-miR-4282      |
| NUDT16 | hsa-miR-6747-5p   |
| NUDT16 | hsa-miR-377-5p    |
| NUDT16 | hsa-miR-6867-5p   |
| NUDT16 | hsa-miR-5121      |
| NUDT16 | hsa-miR-322-5p    |
| NUDT16 | hsa-miR-6841-5p   |
| NUDT16 | hsa-miR-214-5p    |
| NUDT16 | hsa-miR-450b      |
| NUDT16 | hsa-miR-185-5p    |
| NUDT16 | hsa-miR-6338      |
| NUDT16 | hsa-miR-7023-3p   |
| NUDT16 | hsa-miR-23        |
| NUDT16 | hsa-miR-31-5p     |
| NUDT16 | hsa-miR-7150      |
| NUDT16 | hsa-miR-4736      |
| NUDT16 | hsa-miR-7658-3p   |
| NUDT16 | hsa-miR-193-5p    |
| NUDT16 | hsa-miR-7056-3p   |
| NUDT16 | hsa-let-7abf-3p   |
| NUDT16 | hsa-miR-3159      |
| NUDT16 | hsa-miR-711       |
| NUDT16 | hsa-miR-669i      |
| NUDT16 | hsa-miR-4641      |
| NUDT16 | hsa-miR-344d-2-5p |

|        |                    |
|--------|--------------------|
| NUDT16 | hsa-miR-6995-5p    |
| NUDT16 | hsa-miR-671-5p     |
| NUDT16 | hsa-miR-1255b-2-3p |
| NUDT16 | hsa-miR-877-5p     |
| NUDT16 | hsa-miR-4763-5p    |
| NUDT16 | hsa-miR-4761-5p    |
| NUDT16 | hsa-miR-7082-3p    |
| NUDT16 | hsa-miR-378        |
| NUDT16 | hsa-miR-616-5p     |
| NUDT16 | hsa-miR-642a-5p    |
| NUDT16 | hsa-miR-6753-5p    |
| NUDT16 | hsa-miR-7026-3p    |
| NUDT16 | hsa-miR-196c-3p    |
| NUDT16 | hsa-miR-548av-3p   |
| NUDT16 | hsa-miR-676-3p     |
| NUDT16 | hsa-miR-7210-5p    |
| NUDT16 | hsa-miR-6770-5p    |
| NUDT16 | hsa-miR-3127-5p    |
| NUDT16 | hsa-miR-142-3p.1   |
| NUDT16 | hsa-miR-375        |
| NUDT16 | hsa-miR-8061       |
| NUDT16 | hsa-miR-1190       |
| NUDT16 | hsa-miR-7077-3p    |
| NUDT16 | hsa-miR-7238-5p    |
| NUDT16 | hsa-miR-7225-5p    |
| NUDT16 | hsa-miR-2909       |
| NUDT16 | hsa-miR-324        |
| NUDT16 | hsa-miR-4428       |
| NUDT16 | hsa-miR-4690-3p    |
| NUDT16 | hsa-miR-350-3p     |
| NUDT16 | hsa-miR-592        |
| NUDT16 | hsa-miR-2410       |
| NUDT16 | hsa-miR-466dk-5p   |
| NUDT16 | hsa-miR-9-5p       |
| NUDT16 | hsa-miR-2465       |
| NUDT16 | hsa-miR-539-3p     |
| NUDT16 | hsa-miR-148-3p     |
| NUDT16 | hsa-miR-130a-5p    |
| NUDT16 | hsa-miR-6865-3p    |
| NUDT16 | hsa-miR-637        |
| NUDT16 | hsa-miR-380-5p     |
| NUDT16 | hsa-miR-212-5p     |
| NUDT16 | hsa-miR-4717-3p    |
| NUDT16 | hsa-miR-660-5p     |
| NUDT16 | hsa-miR-541-3p     |
| NUDT16 | hsa-miR-6376       |

|        |                  |
|--------|------------------|
| NUDT16 | hsa-miR-362-3p   |
| NUDT16 | hsa-miR-669bf-3p |
| NUDT16 | hsa-miR-632      |
| NUDT16 | hsa-miR-760-3p   |
| NUDT16 | hsa-miR-134      |
| NUDT16 | hsa-miR-5586-3p  |
| NUDT16 | hsa-miR-1915-5p  |
| NUDT16 | hsa-miR-770      |
| NUDT16 | hsa-miR-1247-3p  |
| NUDT16 | hsa-miR-764-3p   |
| NUDT16 | hsa-miR-7847-3p  |
| NUDT16 | hsa-miR-10-5p    |
| NUDT16 | hsa-miR-466f-3p  |
| NUDT16 | hsa-miR-603      |
| NUDT16 | hsa-miR-3120-5p  |
| NUDT16 | hsa-miR-382-3p   |
| NUDT16 | hsa-miR-883ab-3p |
| NUDT16 | hsa-miR-5004-3p  |
| NUDT16 | hsa-miR-7978     |
| NUDT16 | hsa-miR-342-3p   |
| NUDT16 | hsa-miR-7061-5p  |
| NUDT16 | hsa-miR-7195-3p  |
| NUDT16 | hsa-miR-345-3p   |
| NUDT16 | hsa-miR-502a     |
| NUDT16 | hsa-miR-92a-1-5p |
| NUDT16 | hsa-miR-6864-5p  |
| NUDT16 | hsa-miR-8073     |
| NUDT16 | hsa-miR-6520     |
| NUDT16 | hsa-miR-7023-5p  |
| NUDT16 | hsa-miR-292a-5p  |
| NUDT16 | hsa-miR-4796-5p  |
| NUDT16 | hsa-miR-4533     |
| NUDT16 | hsa-miR-7-5p     |
| NUDT16 | hsa-miR-3144-3p  |
| NUDT16 | hsa-miR-1933-3p  |
| NUDT16 | hsa-miR-576-5p   |
| NUDT16 | hsa-miR-4524a-5p |
| NUDT16 | hsa-miR-6883-3p  |
| NUDT16 | hsa-miR-3059-3p  |
| NUDT16 | hsa-miR-197-3p   |
| NUDT16 | hsa-miR-4488     |
| NUDT16 | hsa-miR-765      |
| NUDT16 | hsa-miR-7110-3p  |
| NUDT16 | hsa-miR-451b     |
| NUDT16 | hsa-miR-8808     |
| NUDT16 | hsa-miR-759      |

|        |                  |
|--------|------------------|
| NUDT16 | hsa-miR-7215-5p  |
| NUDT16 | hsa-miR-365b-5p  |
| NUDT16 | hsa-miR-7238-3p  |
| NUDT16 | hsa-miR-7237-3p  |
| NUDT16 | hsa-miR-3092-5p  |
| NUDT16 | hsa-miR-7154-3p  |
| NUDT16 | hsa-miR-520gh    |
| NUDT16 | hsa-miR-1273f    |
| NUDT16 | hsa-miR-298-3p   |
| NUDT16 | hsa-miR-6984-3p  |
| NUDT16 | hsa-miR-8057     |
| NUDT16 | hsa-miR-222-3p   |
| NUDT16 | hsa-miR-3649     |
| NUDT16 | hsa-miR-5000-3p  |
| NUDT16 | hsa-miR-4505     |
| NUDT16 | hsa-miR-8093     |
| NUDT16 | hsa-miR-449c-5p  |
| NUDT16 | hsa-miR-6961-5p  |
| NUDT16 | hsa-miR-383      |
| NUDT16 | hsa-miR-3927-3p  |
| NUDT16 | hsa-miR-878      |
| NUDT16 | hsa-miR-483-3p.2 |
| NUDT16 | hsa-miR-429-3p   |
| NUDT16 | hsa-miR-29a-5p   |
| NUDT16 | hsa-miR-3592     |
| NUDT16 | hsa-miR-6085     |
| NUDT16 | hsa-miR-351-5p   |
| NUDT16 | hsa-miR-4793-5p  |
| NUDT16 | hsa-miR-339-5p   |
| NUDT16 | hsa-miR-3074-3p  |
| NUDT16 | hsa-miR-6919-5p  |
| NUDT16 | hsa-miR-6796-5p  |
| NUDT16 | hsa-miR-4710     |
| NUDT16 | hsa-miR-1903     |
| NUDT16 | hsa-miR-7848-3p  |
| NUDT16 | hsa-miR-1227-3p  |
| NUDT16 | hsa-miR-4512     |
| NUDT16 | hsa-miR-3125     |
| NUDT16 | hsa-miR-6743-5p  |
| NUDT16 | hsa-miR-7176-3p  |
| NUDT16 | hsa-miR-6965-3p  |
| NUDT16 | hsa-miR-4443     |
| NUDT16 | hsa-miR-7073-3p  |
| NUDT16 | hsa-miR-5627-3p  |
| NUDT16 | hsa-miR-3620-3p  |
| NUDT16 | hsa-miR-450b-5p  |

|        |                  |
|--------|------------------|
| NUDT16 | hsa-miR-3072     |
| NUDT16 | hsa-miR-6844     |
| NUDT16 | hsa-miR-4459     |
| NUDT16 | hsa-miR-6324     |
| NUDT16 | hsa-miR-3158-3p  |
| NUDT16 | hsa-miR-6414     |
| NUDT16 | hsa-miR-513a-3p  |
| NUDT16 | hsa-miR-374a-3p  |
| NUDT16 | hsa-miR-8906     |
| NUDT16 | hsa-miR-92a-2-5p |
| NUDT16 | hsa-miR-26b-3p   |
| NUDT16 | hsa-miR-6781-3p  |
| NUDT16 | hsa-miR-7171-5p  |
| NUDT16 | hsa-miR-292-5p   |
| NUDT16 | hsa-miR-6878-5p  |
| NUDT16 | hsa-miR-4501     |
| NUDT16 | hsa-miR-192-5p   |
| NUDT16 | hsa-miR-6804-5p  |
| NUDT16 | hsa-miR-615-3p   |
| NUDT16 | hsa-miR-6840-3p  |
| NUDT16 | hsa-miR-1236-5p  |
| NUDT16 | hsa-miR-3161     |
| NUDT16 | hsa-miR-503-3p   |
| NUDT16 | hsa-miR-4656     |
| NUDT16 | hsa-miR-7006-3p  |
| NUDT16 | hsa-miR-8849     |
| NUDT16 | hsa-miR-6894-5p  |
| NUDT16 | hsa-miR-6799-5p  |
| NUDT16 | hsa-miR-517-5p   |
| NUDT16 | hsa-miR-490-3p   |
| NUDT16 | hsa-miR-7069-5p  |
| NUDT16 | hsa-miR-3193     |
| NUDT16 | hsa-miR-1264-3p  |
| NUDT16 | hsa-miR-543-3p   |
| NUDT16 | hsa-miR-6862-3p  |
| NUDT16 | hsa-miR-5588-5p  |
| NUDT16 | hsa-miR-7851-3p  |
| NUDT16 | hsa-miR-10b-3p   |
| NUDT16 | hsa-miR-608      |
| NUDT16 | hsa-miR-4657     |
| NUDT16 | hsa-miR-4999-5p  |
| NUDT16 | hsa-miR-683      |
| NUDT16 | hsa-miR-1233-5p  |
| NUDT16 | hsa-miR-885      |
| NUDT16 | hsa-miR-6749-3p  |
| NUDT16 | hsa-miR-487a     |

|        |                  |
|--------|------------------|
| NUDT16 | hsa-miR-4283     |
| NUDT16 | hsa-miR-6719-3p  |
| NUDT16 | hsa-miR-3660     |
| NUDT16 | hsa-miR-7117-3p  |
| NUDT16 | hsa-miR-7004-3p  |
| NUDT16 | hsa-miR-207      |
| NUDT16 | hsa-miR-7109-3p  |
| NUDT16 | hsa-miR-1910-3p  |
| NUDT16 | hsa-miR-6868-3p  |
| NUDT16 | hsa-miR-6503-3p  |
| NUDT16 | hsa-miR-1950     |
| NUDT16 | hsa-miR-579-3p   |
| NUDT16 | hsa-miR-190a-3p  |
| NUDT16 | hsa-miR-1200     |
| NUDT16 | hsa-miR-6801-5p  |
| NUDT16 | hsa-miR-3086-5p  |
| NUDT16 | hsa-miR-8844     |
| NUDT16 | hsa-miR-4768-5p  |
| NUDT16 | hsa-miR-4797-5p  |
| NUDT16 | hsa-miR-338-3p   |
| NUDT16 | hsa-miR-429      |
| NUDT16 | hsa-miR-4691-5p  |
| NUDT16 | hsa-miR-365a-5p  |
| NUDT16 | hsa-miR-5193     |
| NUDT16 | hsa-miR-6780b-5p |
| NUDT16 | hsa-miR-7215-3p  |
| NUDT16 | hsa-miR-3667-5p  |
| NUDT16 | hsa-miR-1251-3p  |
| NUDT16 | hsa-miR-23a-5p   |
| NUDT16 | hsa-miR-6891-3p  |
| NUDT16 | hsa-miR-150-3p   |
| NUDT16 | hsa-miR-942      |
| NUDT16 | hsa-miR-7192-3p  |
| NUDT16 | hsa-miR-871-5p   |
| NUDT16 | hsa-miR-5580-3p  |
| NUDT16 | hsa-miR-463-5p   |
| NUDT16 | hsa-miR-1842     |
| NUDT16 | hsa-miR-370-3p   |
| NUDT16 | hsa-miR-6356     |
| NUDT16 | hsa-miR-6372     |
| NUDT16 | hsa-miR-4480     |
| NUDT16 | hsa-miR-667-5p   |
| NUDT16 | hsa-miR-3069-3p  |
| NUDT16 | hsa-miR-6511-3p  |
| NUDT16 | hsa-miR-760-5p   |
| NUDT16 | hsa-miR-30e-3p   |

|        |                   |
|--------|-------------------|
| NUDT16 | hsa-miR-7195-5p   |
| NUDT16 | hsa-miR-6071      |
| NUDT16 | hsa-miR-7038-3p   |
| NUDT16 | hsa-miR-6740-3p   |
| NUDT16 | hsa-miR-6990-5p   |
| NUDT16 | hsa-miR-4722-3p   |
| NUDT16 | hsa-miR-6393      |
| NUDT16 | hsa-miR-6753-3p   |
| NUDT16 | hsa-miR-7045-3p   |
| NUDT16 | hsa-miR-208-5p    |
| NUDT16 | hsa-miR-4446-3p   |
| NUDT16 | hsa-miR-488-3p    |
| NUDT16 | hsa-miR-3918      |
| NUDT16 | hsa-miR-350       |
| NUDT16 | hsa-miR-4728-3p   |
| NUDT16 | hsa-miR-190a-5p   |
| NUDT16 | hsa-miR-6795-3p   |
| NUDT16 | hsa-miR-6765-3p   |
| NUDT16 | hsa-miR-4697-3p   |
| NUDT16 | hsa-miR-670-5p    |
| NUDT16 | hsa-miR-568       |
| NUDT16 | hsa-miR-7684-5p   |
| NUDT16 | hsa-miR-7093-3p   |
| NUDT16 | hsa-miR-455-5p    |
| NUDT16 | hsa-miR-873a-5p.2 |
| NUDT16 | hsa-miR-1388-3p   |
| NUDT16 | hsa-miR-7-5p      |
| NUDT16 | hsa-miR-6938-5p   |
| NUDT16 | hsa-miR-138-5p    |
| NUDT16 | hsa-miR-20b-3p    |
| NUDT16 | hsa-miR-550-3p    |
| NUDT16 | hsa-miR-6958-3p   |
| NUDT16 | hsa-miR-133a-3p.2 |
| NUDT16 | hsa-miR-6819-5p   |
| NUDT16 | hsa-miR-3120-3p   |
| NUDT16 | hsa-miR-434-3p    |
| NUDT16 | hsa-miR-3175      |
| NUDT16 | hsa-miR-3934-5p   |
| NUDT16 | hsa-miR-7009-5p   |
| NUDT16 | hsa-miR-6779-5p   |
| NUDT16 | hsa-miR-215       |
| NUDT16 | hsa-miR-627-3p    |
| NUDT16 | hsa-miR-4683      |
| NUDT16 | hsa-miR-467f      |
| NUDT16 | hsa-miR-302c-3p   |
| NUDT16 | hsa-miR-7243-3p   |

|        |                  |
|--------|------------------|
| NUDT16 | hsa-miR-378-5p   |
| NUDT16 | hsa-miR-4432     |
| NUDT16 | hsa-miR-2682-3p  |
| NUDT16 | hsa-miR-574-5p   |
| NUDT16 | hsa-miR-6822-5p  |
| NUDT16 | hsa-miR-6731-5p  |
| NUDT16 | hsa-miR-133      |
| NUDT16 | hsa-miR-4666a-5p |
| NUDT16 | hsa-miR-501-5p   |
| NUDT16 | hsa-miR-6891-5p  |
| NUDT16 | hsa-miR-6892-3p  |
| NUDT16 | hsa-miR-4725-5p  |
| NUDT16 | hsa-miR-299      |
| NUDT16 | hsa-miR-342-5p   |
| NUDT16 | hsa-miR-3075-3p  |
| NUDT16 | hsa-miR-548v     |
| NUDT16 | hsa-miR-466n-3p  |
| NUDT16 | hsa-miR-519-5p   |
| NUDT16 | hsa-miR-686      |
| NUDT16 | hsa-miR-540-3p   |
| NUDT16 | hsa-miR-7151-5p  |
| NUDT16 | hsa-miR-519-3p   |
| NUDT16 | hsa-miR-3655     |
| NUDT16 | hsa-miR-6800-3p  |
| NUDT16 | hsa-miR-8817     |
| NUDT16 | hsa-miR-7086-5p  |
| NUDT16 | hsa-miR-4287     |
| NUDT16 | hsa-miR-7193-3p  |
| NUDT16 | hsa-miR-290a-5p  |
| NUDT16 | hsa-miR-942-5p   |
| NUDT16 | hsa-miR-1202     |
| NUDT16 | hsa-miR-502-5p   |
| NUDT16 | hsa-miR-1843b-5p |
| NUDT16 | hsa-miR-4450     |
| NUDT16 | hsa-miR-4711-5p  |
| NUDT16 | hsa-miR-1260a    |
| NUDT16 | hsa-miR-1912-3p  |
| NUDT16 | hsa-miR-4654     |
| NUDT16 | hsa-miR-548k     |
| NUDT16 | hsa-miR-1233-3p  |
| NUDT16 | hsa-miR-3591-5p  |
| NUDT16 | hsa-miR-5701     |
| NUDT16 | hsa-miR-8874     |
| NUDT16 | hsa-miR-424-5p   |
| NUDT16 | hsa-miR-523-3p   |
| NUDT16 | hsa-let-7-5p     |



|        |                   |
|--------|-------------------|
| NUDT16 | hsa-miR-525-5p    |
| NUDT16 | hsa-miR-7012-5p   |
| NUDT16 | hsa-miR-100-3p    |
| NUDT16 | hsa-miR-3619-5p   |
| NUDT16 | hsa-miR-4516      |
| NUDT16 | hsa-miR-550a-3-5p |
| NUDT16 | hsa-miR-5009-5p   |
| NUDT16 | hsa-miR-4741      |
| NUDT3  | hsa-miR-548p      |
| NUDT3  | hsa-miR-7691      |
| NUDT3  | hsa-miR-7068-3p   |
| NUDT3  | hsa-miR-302c-3p.2 |
| NUDT3  | hsa-miR-2285      |
| NUDT3  | hsa-miR-7657-3p   |
| NUDT3  | hsa-miR-106-3p    |
| NUDT3  | hsa-miR-511-3p    |
| NUDT3  | hsa-miR-2284a     |
| NUDT3  | hsa-miR-219-5p    |
| NUDT3  | hsa-miR-4275      |
| NUDT3  | hsa-miR-650       |
| NUDT3  | hsa-miR-542       |
| NUDT3  | hsa-miR-3154      |
| NUDT3  | hsa-miR-2406      |
| NUDT3  | hsa-miR-2054      |
| NUDT3  | hsa-miR-3144-3p   |
| NUDT3  | hsa-miR-6828-5p   |
| NUDT3  | hsa-miR-548d-5p   |
| NUDT3  | hsa-miR-34c-3p    |
| NUDT3  | hsa-miR-8799      |
| NUDT3  | hsa-miR-148b-5p   |
| NUDT3  | hsa-miR-2052      |
| NUDT3  | hsa-miR-4699-5p   |
| NUDT3  | hsa-miR-8837      |
| NUDT3  | hsa-miR-92b-5p    |
| NUDT3  | hsa-miR-1587      |
| NUDT3  | hsa-miR-6719-3p   |
| NUDT3  | hsa-miR-8905      |
| NUDT3  | hsa-miR-548g-3p   |
| NUDT3  | hsa-miR-7386f-3p  |
| NUDT3  | hsa-miR-7480-5p   |
| NUDT3  | hsa-miR-7078-3p   |
| NUDT3  | hsa-miR-526       |
| NUDT3  | hsa-miR-878       |
| NUDT3  | hsa-miR-3137      |
| NUDT3  | hsa-miR-7278-5p   |
| NUDT3  | hsa-miR-1717      |

|       |                  |
|-------|------------------|
| NUDT3 | hsa-miR-33b-3p   |
| NUDT3 | hsa-miR-3078-5p  |
| NUDT3 | hsa-miR-4760-5p  |
| NUDT3 | hsa-miR-2431-3p  |
| NUDT3 | hsa-miR-512      |
| NUDT3 | hsa-miR-1264     |
| NUDT3 | hsa-miR-548as-3p |
| NUDT3 | hsa-miR-6860     |
| NUDT3 | hsa-miR-384-3p   |
| NUDT3 | hsa-miR-891-3p   |
| NUDT3 | hsa-miR-367-5p   |
| NUDT3 | hsa-miR-2399-5p  |
| NUDT3 | hsa-miR-6562-5p  |
| NUDT3 | hsa-let-7j-3p    |
| NUDT3 | hsa-miR-7251-3p  |
| NUDT3 | hsa-miR-6400     |
| NUDT3 | hsa-miR-382-5p   |
| NUDT3 | hsa-miR-889-3p   |
| NUDT3 | hsa-miR-7187-3p  |
| NUDT3 | hsa-miR-20-3p    |
| NUDT3 | hsa-miR-7379-3p  |
| NUDT3 | hsa-miR-539-3p   |
| NUDT3 | hsa-miR-6870-5p  |
| NUDT3 | hsa-miR-7156-3p  |
| NUDT3 | hsa-miR-542-5p   |
| NUDT3 | hsa-miR-5009-3p  |
| NUDT3 | hsa-miR-2115-3p  |
| NUDT3 | hsa-miR-154-5p   |
| NUDT3 | hsa-miR-1229-5p  |
| NUDT3 | hsa-miR-1263     |
| NUDT3 | hsa-miR-6825-5p  |
| NUDT3 | hsa-miR-322-3p   |
| NUDT3 | hsa-miR-8119     |
| NUDT3 | hsa-miR-199-5p   |
| NUDT3 | hsa-miR-6981-3p  |
| NUDT3 | hsa-miR-515-3p   |
| NUDT3 | hsa-miR-7000-5p  |
| NUDT3 | hsa-miR-7334-5p  |
| NUDT3 | hsa-miR-30c-2-3p |
| NUDT3 | hsa-miR-3150a-3p |
| NUDT3 | hsa-miR-1227-3p  |
| NUDT3 | hsa-miR-4664-5p  |
| NUDT3 | hsa-miR-2317     |
| NUDT3 | hsa-miR-6351     |
| NUDT3 | hsa-miR-2370-5p  |
| NUDT3 | hsa-miR-1964-5p  |

|       |                   |
|-------|-------------------|
| NUDT3 | hsa-miR-219b      |
| NUDT3 | hsa-miR-411-5p.1  |
| NUDT3 | hsa-miR-1-1-5p    |
| NUDT3 | hsa-miR-1287      |
| NUDT3 | hsa-miR-105-5p    |
| NUDT3 | hsa-miR-517       |
| NUDT3 | hsa-miR-3713      |
| NUDT3 | hsa-miR-6808-5p   |
| NUDT3 | hsa-miR-6791-5p   |
| NUDT3 | hsa-miR-8067      |
| NUDT3 | hsa-miR-203a-3p.1 |
| NUDT3 | hsa-miR-7389-3p   |
| NUDT3 | hsa-miR-2377      |
| NUDT3 | hsa-miR-508b      |
| NUDT3 | hsa-miR-221-5p    |
| NUDT3 | hsa-miR-2284y     |
| NUDT3 | hsa-miR-628-5p    |
| NUDT3 | hsa-miR-344f-3p   |
| NUDT3 | hsa-miR-3173-3p   |
| NUDT3 | hsa-miR-6922-3p   |
| NUDT3 | hsa-miR-7454-3p   |
| NUDT3 | hsa-miR-7371f-5p  |
| NUDT3 | hsa-miR-372-5p    |
| NUDT3 | hsa-miR-222-3p    |
| NUDT3 | hsa-miR-6561-5p   |
| NUDT3 | hsa-miR-3076-5p   |
| NUDT3 | hsa-miR-7153-3p   |
| NUDT3 | hsa-miR-1597-5p   |
| NUDT3 | hsa-miR-6318      |
| NUDT3 | hsa-miR-3189-3p   |
| NUDT3 | hsa-miR-665-5p    |
| NUDT3 | hsa-miR-8089      |
| NUDT3 | hsa-miR-101-3p    |
| NUDT3 | hsa-miR-6914-3p   |
| NUDT3 | hsa-miR-3926      |
| NUDT3 | hsa-miR-8074      |
| NUDT3 | hsa-miR-1789      |
| NUDT3 | hsa-miR-6833-3p   |
| NUDT3 | hsa-miR-8796      |
| NUDT3 | hsa-miR-1306-5p   |
| NUDT3 | hsa-miR-323a-5p   |
| NUDT3 | hsa-miR-201-3p    |
| NUDT3 | hsa-miR-4330      |
| NUDT3 | hsa-miR-7681-5p   |
| NUDT3 | hsa-miR-130-3p    |
| NUDT3 | hsa-miR-4758-5p   |

|       |                  |
|-------|------------------|
| NUDT3 | hsa-miR-8073     |
| NUDT3 | hsa-miR-2296     |
| NUDT3 | hsa-miR-582-5p   |
| NUDT3 | hsa-miR-142      |
| NUDT3 | hsa-miR-2373-5p  |
| NUDT3 | hsa-miR-1753     |
| NUDT3 | hsa-miR-3174     |
| NUDT3 | hsa-miR-6890-3p  |
| NUDT3 | hsa-miR-4649-3p  |
| NUDT3 | hsa-miR-871-5p   |
| NUDT3 | hsa-miR-466      |
| NUDT3 | hsa-miR-1291     |
| NUDT3 | hsa-miR-3081-5p  |
| NUDT3 | hsa-miR-1894-3p  |
| NUDT3 | hsa-miR-2354     |
| NUDT3 | hsa-miR-149-5p   |
| NUDT3 | hsa-miR-7300-3p  |
| NUDT3 | hsa-miR-1839     |
| NUDT3 | hsa-miR-2472     |
| NUDT3 | hsa-miR-6943-3p  |
| NUDT3 | hsa-miR-2136     |
| NUDT3 | hsa-miR-7197-3p  |
| NUDT3 | hsa-miR-4496     |
| NUDT3 | hsa-miR-133-3p.1 |
| NUDT3 | hsa-miR-449-3p   |
| NUDT3 | hsa-miR-548as-5p |
| NUDT3 | hsa-miR-499b-5p  |
| NUDT3 | hsa-miR-7299-3p  |
| NUDT3 | hsa-miR-4456     |
| NUDT3 | hsa-miR-7023-3p  |
| NUDT3 | hsa-miR-4505     |
| NUDT3 | hsa-miR-7115-3p  |
| NUDT3 | hsa-miR-3145-5p  |
| NUDT3 | hsa-miR-183-3p   |
| NUDT3 | hsa-miR-1843     |
| NUDT3 | hsa-miR-21-5p    |
| NUDT3 | hsa-miR-6529b    |
| NUDT3 | hsa-miR-552-5p   |
| NUDT3 | hsa-miR-1254     |
| NUDT3 | hsa-miR-4492     |
| NUDT3 | hsa-miR-4663     |
| NUDT3 | hsa-miR-7113-5p  |
| NUDT3 | hsa-miR-6598-5p  |
| NUDT3 | hsa-miR-7386h-5p |
| NUDT3 | hsa-miR-132-3p   |
| NUDT3 | hsa-miR-95-5p    |

|       |                  |
|-------|------------------|
| NUDT3 | hsa-miR-1279     |
| NUDT3 | hsa-miR-3124-3p  |
| NUDT3 | hsa-miR-4452     |
| NUDT3 | hsa-miR-679-3p   |
| NUDT3 | hsa-miR-96-5p    |
| NUDT3 | hsa-miR-382-3p   |
| NUDT3 | hsa-miR-7173-3p  |
| NUDT3 | hsa-miR-6952-3p  |
| NUDT3 | hsa-miR-4691-3p  |
| NUDT3 | hsa-miR-26-3-3p  |
| NUDT3 | hsa-miR-2467-3p  |
| NUDT3 | hsa-miR-92       |
| NUDT3 | hsa-miR-5579-3p  |
| NUDT3 | hsa-miR-6845-3p  |
| NUDT3 | hsa-miR-8810     |
| NUDT3 | hsa-miR-4286     |
| NUDT3 | hsa-miR-295-3p   |
| NUDT3 | hsa-miR-5683     |
| NUDT3 | hsa-miR-873a-3p  |
| NUDT3 | hsa-miR-19b-5p   |
| NUDT3 | hsa-miR-3577-3p  |
| NUDT3 | hsa-miR-6732-5p  |
| NUDT3 | hsa-miR-708-5p   |
| NUDT3 | hsa-miR-2284g    |
| NUDT3 | hsa-miR-873-5p   |
| NUDT3 | hsa-miR-4724-5p  |
| NUDT3 | hsa-miR-22-3p    |
| NUDT3 | hsa-miR-4289     |
| NUDT3 | hsa-miR-7398p-5p |
| NUDT3 | hsa-miR-145-5p   |
| NUDT3 | hsa-miR-6953-5p  |
| NUDT3 | hsa-miR-501-5p   |
| NUDT3 | hsa-miR-379-3p   |
| NUDT3 | hsa-miR-98-3p    |
| NUDT3 | hsa-miR-7333-5p  |
| NUDT3 | hsa-miR-770-3p   |
| NUDT3 | hsa-miR-4690-3p  |
| NUDT3 | hsa-miR-323b-3p  |
| NUDT3 | hsa-miR-7378-5p  |
| NUDT3 | hsa-miR-7339-5p  |
| NUDT3 | hsa-miR-3140-3p  |
| NUDT3 | hsa-miR-760-5p   |
| NUDT3 | hsa-miR-19a-5p   |
| NUDT3 | hsa-miR-2285d    |
| NUDT3 | hsa-miR-7-3p     |
| NUDT3 | hsa-miR-2462     |

|       |                   |
|-------|-------------------|
| NUDT3 | hsa-miR-3531-5p   |
| NUDT3 | hsa-miR-23b-5p    |
| NUDT3 | hsa-miR-704       |
| NUDT3 | hsa-miR-3473f     |
| NUDT3 | hsa-miR-4433b-5p  |
| NUDT3 | hsa-miR-7472-5p   |
| NUDT3 | hsa-miR-7452-5p   |
| NUDT3 | hsa-miR-7182-3p   |
| NUDT3 | hsa-miR-1233-3p   |
| NUDT3 | hsa-miR-7649-5p   |
| NUDT3 | hsa-miR-691       |
| NUDT3 | hsa-miR-1208      |
| NUDT3 | hsa-miR-6590-3p   |
| NUDT3 | hsa-miR-7317-3p   |
| NUDT3 | hsa-miR-350       |
| NUDT3 | hsa-miR-4482-3p   |
| NUDT3 | hsa-miR-1807      |
| NUDT3 | hsa-miR-8093      |
| NUDT3 | hsa-miR-3160-3p   |
| NUDT3 | hsa-miR-1966-3p   |
| NUDT3 | hsa-miR-16-2-3p   |
| NUDT3 | hsa-miR-888-5p    |
| NUDT3 | hsa-miR-1273h-3p  |
| NUDT3 | hsa-miR-4535      |
| NUDT3 | hsa-miR-8853      |
| NUDT3 | hsa-miR-1936      |
| NUDT3 | hsa-miR-3662      |
| NUDT3 | hsa-miR-302b-5p   |
| NUDT3 | hsa-miR-590-5p    |
| NUDT3 | hsa-miR-548ar-3p  |
| NUDT3 | hsa-miR-518c-5p   |
| NUDT3 | hsa-miR-345-5p    |
| NUDT3 | hsa-miR-4757-5p   |
| NUDT3 | hsa-miR-217-5p    |
| NUDT3 | hsa-miR-889       |
| NUDT3 | hsa-miR-873a-5p.2 |
| NUDT3 | hsa-miR-4637      |
| NUDT3 | hsa-miR-301       |
| NUDT3 | hsa-miR-3104-5p   |
| NUDT3 | hsa-miR-743b-3p   |
| NUDT3 | hsa-miR-5587-5p   |
| NUDT3 | hsa-miR-483-3p.2  |
| NUDT3 | hsa-miR-107-3p    |
| NUDT3 | hsa-miR-3194-3p   |
| NUDT3 | hsa-miR-6892-5p   |
| NUDT3 | hsa-miR-2682-3p   |

|       |                  |
|-------|------------------|
| NUDT3 | hsa-miR-6715-3p  |
| NUDT3 | hsa-miR-2299-5p  |
| NUDT3 | hsa-miR-8866     |
| NUDT3 | hsa-miR-6931-3p  |
| NUDT3 | hsa-miR-601      |
| NUDT3 | hsa-miR-7112-5p  |
| NUDT3 | hsa-miR-664a-5p  |
| NUDT3 | hsa-miR-8908b    |
| NUDT3 | hsa-miR-7274-5p  |
| NUDT3 | hsa-miR-7185-5p  |
| NUDT3 | hsa-miR-499      |
| NUDT3 | hsa-miR-644a     |
| NUDT3 | hsa-miR-3679-3p  |
| NUDT3 | hsa-miR-7398d-3p |
| NUDT3 | hsa-miR-1898     |
| NUDT3 | hsa-miR-6134     |
| NUDT3 | hsa-miR-4756-3p  |
| NUDT3 | hsa-miR-212-3p   |
| NUDT3 | hsa-miR-1913     |
| NUDT3 | hsa-miR-7843-5p  |
| NUDT3 | hsa-miR-571      |
| NUDT3 | hsa-miR-215-5p   |
| NUDT3 | hsa-miR-7279-5p  |
| NUDT3 | hsa-miR-4510     |
| NUDT3 | hsa-miR-6896-3p  |
| NUDT3 | hsa-miR-7-5p     |
| NUDT3 | hsa-miR-6979-5p  |
| NUDT3 | hsa-miR-216b-5p  |
| NUDT3 | hsa-miR-193-5p   |
| NUDT3 | hsa-miR-516a-3p  |
| NUDT3 | hsa-miR-4751     |
| NUDT3 | hsa-miR-371      |
| NUDT3 | hsa-miR-548e-3p  |
| NUDT3 | hsa-miR-1261     |
| NUDT3 | hsa-miR-6744-5p  |
| NUDT3 | hsa-miR-1179     |
| NUDT3 | hsa-miR-2294     |
| NUDT3 | hsa-miR-5003-3p  |
| NUDT3 | hsa-miR-7398r-5p |
| NUDT3 | hsa-miR-4772-3p  |
| NUDT3 | hsa-miR-938      |
| NUDT3 | hsa-miR-4472     |
| NUDT3 | hsa-miR-654-5p   |
| NUDT3 | hsa-miR-3665     |
| NUDT3 | hsa-miR-200ac-5p |
| NUDT3 | hsa-miR-758-3p   |

|       |                  |
|-------|------------------|
| NUDT3 | hsa-miR-612      |
| NUDT3 | hsa-miR-7339-3p  |
| NUDT3 | hsa-miR-3201     |
| NUDT3 | hsa-miR-6826-3p  |
| NUDT3 | hsa-miR-4633-5p  |
| NUDT3 | hsa-miR-669b-5p  |
| NUDT3 | hsa-miR-7398j-3p |
| NUDT3 | hsa-miR-6876-5p  |
| NUDT3 | hsa-miR-8842     |
| NUDT3 | hsa-miR-2113     |
| NUDT3 | hsa-miR-34-5p    |
| NUDT3 | hsa-miR-1257     |
| NUDT3 | hsa-miR-15       |
| NUDT3 | hsa-miR-6933-3p  |
| NUDT3 | hsa-miR-2380     |
| NUDT3 | hsa-miR-6502-5p  |
| NUDT3 | hsa-miR-492      |
| NUDT3 | hsa-miR-6130     |
| NUDT3 | hsa-miR-224-5p   |
| NUDT3 | hsa-miR-2319     |
| NUDT3 | hsa-miR-669h-5p  |
| NUDT3 | hsa-miR-578      |
| NUDT3 | hsa-miR-7451-3p  |
| NUDT3 | hsa-miR-497-3p   |
| NUDT3 | hsa-miR-4725-3p  |
| NUDT3 | hsa-miR-2483-3p  |
| NUDT3 | hsa-miR-3961     |
| NUDT3 | hsa-miR-142b     |
| NUDT3 | hsa-miR-200c-5p  |
| NUDT3 | hsa-miR-1953     |
| NUDT3 | hsa-miR-6984-5p  |
| NUDT3 | hsa-miR-2415-3p  |
| NUDT3 | hsa-miR-6929-5p  |
| NUDT3 | hsa-miR-4719     |
| NUDT3 | hsa-miR-1250-3p  |
| NUDT3 | hsa-miR-371a-5p  |
| NUDT3 | hsa-miR-712-5p   |
| NUDT3 | hsa-miR-7028-3p  |
| NUDT3 | hsa-miR-548bd-3p |
| NUDT3 | hsa-miR-516-3p   |
| NUDT3 | hsa-miR-142-3p.2 |
| NUDT3 | hsa-miR-6995-3p  |
| NUDT3 | hsa-miR-6752-5p  |
| NUDT3 | hsa-miR-7388a-5p |
| NUDT3 | hsa-miR-7856-5p  |
| NUDT3 | hsa-miR-4476     |



|       |                  |
|-------|------------------|
| NUDT3 | hsa-miR-454-3p   |
| NUDT3 | hsa-miR-3938-5p  |
| NUDT3 | hsa-miR-1276     |
| NUDT3 | hsa-miR-548x-5p  |
| NUDT3 | hsa-miR-1954     |
| NUDT3 | hsa-miR-3120-5p  |
| NUDT3 | hsa-miR-2285y    |
| NUDT3 | hsa-miR-7194-5p  |
| NUDT3 | hsa-miR-6525     |
| NUDT3 | hsa-miR-122      |
| NUDT3 | hsa-miR-4769-5p  |
| NUDT3 | hsa-miR-6843-3p  |
| NUDT3 | hsa-miR-124-3p.2 |
| NUDT3 | hsa-miR-2439-5p  |
| NUDT3 | hsa-miR-190b-3p  |
| NUDT3 | hsa-miR-4441     |
| NUDT3 | hsa-miR-2466-3p  |
| NUDT3 | hsa-miR-2309     |
| NUDT3 | hsa-miR-514b-5p  |
| NUDT3 | hsa-miR-6841-3p  |
| NUDT3 | hsa-miR-1941-3p  |
| NUDT3 | hsa-miR-4299     |
| NUDT3 | hsa-miR-6893-5p  |
| NUDT3 | hsa-miR-1550-5p  |
| NUDT3 | hsa-miR-7398l-3p |
| NUDT3 | hsa-miR-4765     |
| NUDT3 | hsa-miR-493      |
| NUDT3 | hsa-miR-4708-5p  |
| NUDT3 | hsa-miR-549-5p   |
| NUDT3 | hsa-miR-548bb-5p |
| NUDT3 | hsa-miR-1464     |
| NUDT3 | hsa-miR-7649-3p  |
| NUDT3 | hsa-miR-335-3p   |
| NUDT3 | hsa-miR-7021-3p  |
| NUDT3 | hsa-miR-2425-5p  |
| NUDT3 | hsa-miR-125a-3p  |
| NUDT3 | hsa-miR-3180-5p  |
| NUDT3 | hsa-miR-191-5p   |
| NUDT3 | hsa-miR-6573-5p  |
| NUDT3 | hsa-miR-4677-5p  |
| NUDT3 | hsa-miR-7199-3p  |
| NUDT3 | hsa-miR-135-3p   |
| NUDT3 | hsa-miR-93-3p    |
| NUDT3 | hsa-miR-7674-3p  |
| NUDT3 | hsa-miR-526b-5p  |
| NUDT3 | hsa-miR-4715-3p  |

|       |                  |
|-------|------------------|
| NUDT3 | hsa-miR-101-2-5p |
| NUDT3 | hsa-miR-2331-3p  |
| NUDT3 | hsa-miR-7865     |
| NUDT3 | hsa-miR-4256     |
| NUDT3 | hsa-miR-6890-5p  |
| NUDT3 | hsa-miR-203      |
| NUDT3 | hsa-miR-5001-3p  |
| NUDT3 | hsa-miR-136-5p   |
| NUDT3 | hsa-miR-6847-3p  |
| NUDT3 | hsa-miR-4792     |
| NUDT3 | hsa-miR-6790-3p  |
| NUDT3 | hsa-miR-6974-3p  |
| NUDT3 | hsa-miR-3573-5p  |
| NUDT3 | hsa-miR-7079-5p  |
| NUDT3 | hsa-miR-194-5p   |
| NUDT3 | hsa-miR-329b     |
| NUDT3 | hsa-miR-3668     |
| NUDT3 | hsa-miR-527      |
| NUDT3 | hsa-miR-508-3p   |
| NUDT3 | hsa-miR-5008-5p  |
| NUDT3 | hsa-miR-7276-5p  |
| NUDT3 | hsa-miR-2467-5p  |
| NUDT3 | hsa-miR-1952     |
| NUDT3 | hsa-miR-7111-5p  |
| NUDT3 | hsa-miR-2896     |
| NUDT3 | hsa-miR-29       |
| NUDT3 | hsa-miR-5681a    |
| NUDT3 | hsa-miR-5119     |
| NUDT3 | hsa-miR-134-3p   |
| NUDT3 | hsa-miR-8847     |
| NUDT3 | hsa-miR-455-5p   |
| NUDT3 | hsa-miR-6822-3p  |
| NUDT3 | hsa-miR-8908f    |
| NUDT3 | hsa-miR-340-5p   |
| NUDT3 | hsa-miR-31-3p    |
| NUDT3 | hsa-miR-466q     |
| NUDT3 | hsa-miR-301a-5p  |
| NUDT3 | hsa-miR-568      |
| NUDT3 | hsa-miR-767-5p   |
| NUDT3 | hsa-miR-2434     |
| NUDT3 | hsa-miR-4713-5p  |
| NUDT3 | hsa-miR-4693-3p  |
| NUDT3 | hsa-miR-8829     |
| NUDT3 | hsa-miR-6823-5p  |
| NUDT3 | hsa-miR-672-3p   |
| NUDT3 | hsa-miR-1909-5p  |

|       |                  |
|-------|------------------|
| NUDT3 | hsa-miR-2464-3p  |
| NUDT3 | hsa-miR-6534     |
| NUDT3 | hsa-miR-7313-3p  |
| NUDT3 | hsa-miR-8070     |
| NUDT3 | hsa-miR-6782-5p  |
| NUDT3 | hsa-miR-888-3p   |
| NUDT3 | hsa-miR-6523a    |
| NUDT3 | hsa-miR-8791     |
| NUDT3 | hsa-miR-1193-3p  |
| NUDT3 | hsa-miR-505-3p   |
| NUDT3 | hsa-miR-29b-5p   |
| NUDT3 | hsa-miR-199-3p   |
| NUDT3 | hsa-miR-1251-5p  |
| NUDT3 | hsa-miR-4778-5p  |
| NUDT3 | hsa-miR-6654-3p  |
| NUDT3 | hsa-miR-5571-5p  |
| NUDT3 | hsa-miR-4318     |
| NUDT3 | hsa-miR-4524a-3p |
| NUDT3 | hsa-miR-585-5p   |
| NUDT3 | hsa-miR-5001-5p  |
| NUDT3 | hsa-miR-7235-3p  |
| NUDT3 | hsa-miR-496.2    |
| NUDT3 | hsa-miR-8807     |
| NUDT3 | hsa-miR-7283-5p  |
| NUDT3 | hsa-miR-3166     |
| NUDT3 | hsa-miR-4766-5p  |
| NUDT3 | hsa-miR-3117-5p  |
| NUDT3 | hsa-miR-4780     |
| NUDT3 | hsa-miR-7106-5p  |
| NUDT3 | hsa-miR-214-5p   |
| NUDT3 | hsa-miR-4282     |
| NUDT3 | hsa-miR-609      |
| NUDT3 | hsa-miR-2300-3p  |
| NUDT3 | hsa-miR-192-5p   |
| NUDT3 | hsa-miR-3602     |
| NUDT3 | hsa-miR-7386d-3p |
| NUDT3 | hsa-miR-145-5p   |
| NUDT3 | hsa-miR-6874-3p  |
| NUDT3 | hsa-miR-1204     |
| NUDT3 | hsa-miR-29a-3p   |
| NUDT3 | hsa-miR-6790-5p  |
| NUDT3 | hsa-miR-7224-5p  |
| NUDT3 | hsa-miR-8103     |
| NUDT3 | hsa-miR-4423-5p  |
| NUDT3 | hsa-miR-1593     |
| NUDT3 | hsa-miR-7321-3p  |

|       |                  |
|-------|------------------|
| NUDT3 | hsa-miR-1245a    |
| NUDT3 | hsa-miR-3680-5p  |
| NUDT3 | hsa-miR-6742-3p  |
| NUDT3 | hsa-miR-490-5p   |
| NUDT3 | hsa-miR-4694-5p  |
| NUDT3 | hsa-miR-2439-3p  |
| NUDT3 | hsa-miR-152-5p   |
| NUDT3 | hsa-miR-4522     |
| NUDT3 | hsa-miR-491-5p   |
| NUDT3 | hsa-miR-7358-3p  |
| NUDT3 | hsa-miR-3557-3p  |
| NUDT3 | hsa-miR-493-3p   |
| NUDT3 | hsa-miR-6756-5p  |
| NUDT3 | hsa-miR-455-3p   |
| NUDT3 | hsa-miR-8881     |
| NUDT3 | hsa-miR-34       |
| NUDT3 | hsa-miR-6528     |
| NUDT3 | hsa-miR-7671-3p  |
| NUDT3 | hsa-miR-7373a-3p |
| NUDT3 | hsa-miR-1199-5p  |
| NUDT3 | hsa-miR-4773     |
| NUDT3 | hsa-miR-2898     |
| NUDT3 | hsa-miR-101-1-5p |
| NUDT3 | hsa-miR-6780b-3p |
| NUDT3 | hsa-miR-2486-5p  |
| NUDT3 | hsa-miR-1323     |
| NUDT3 | hsa-miR-874      |
| NUDT3 | hsa-miR-1285-3p  |
| NUDT3 | hsa-miR-3663-3p  |
| NUDT3 | hsa-miR-340-3p   |
| NUDT3 | hsa-miR-6688-3p  |
| NUDT3 | hsa-miR-7267-3p  |
| NUDT3 | hsa-miR-4328     |
| NUDT3 | hsa-miR-6745     |
| NUDT3 | hsa-miR-1744-5p  |
| NUDT3 | hsa-miR-6847-5p  |
| NUDT3 | hsa-miR-7282-3p  |
| NUDT3 | hsa-miR-2285h    |
| NUDT3 | hsa-miR-33a-3p   |
| NUDT3 | hsa-miR-190-5p   |
| NUDT3 | hsa-miR-5191     |
| NUDT3 | hsa-miR-4308     |
| NUDT3 | hsa-miR-3689-3p  |
| NUDT3 | hsa-miR-214-3p   |
| NUDT3 | hsa-miR-6399     |
| NUDT3 | hsa-miR-129-5p   |

|       |                  |
|-------|------------------|
| NUDT3 | hsa-miR-6889-3p  |
| NUDT3 | hsa-miR-6392-5p  |
| NUDT3 | hsa-miR-1966-5p  |
| NUDT3 | hsa-miR-7355-5p  |
| NUDT3 | hsa-miR-6886-3p  |
| NUDT3 | hsa-miR-373-5p   |
| NUDT3 | hsa-miR-103-3p   |
| NUDT3 | hsa-miR-7666-3p  |
| NUDT3 | hsa-miR-706      |
| NUDT3 | hsa-miR-616-5p   |
| NUDT3 | hsa-miR-411-5p.2 |
| NUDT3 | hsa-miR-200c-3p  |
| NUDT3 | hsa-miR-2681-5p  |
| NUDT3 | hsa-miR-4665-5p  |
| NUDT3 | hsa-miR-7226-3p  |
| NUDT3 | hsa-miR-4252     |
| NUDT3 | hsa-miR-7864     |
| NUDT3 | hsa-miR-6779-5p  |
| NUDT3 | hsa-miR-7327-5p  |
| NUDT3 | hsa-miR-603      |
| NUDT3 | hsa-miR-5121     |
| NUDT3 | hsa-miR-378a-5p  |
| NUDT3 | hsa-miR-2468     |
| NUDT3 | hsa-miR-7664-5p  |
| NUDT3 | hsa-miR-1799     |
| NUDT3 | hsa-miR-449c-5p  |
| NUDT3 | hsa-miR-6803-5p  |
| NUDT3 | hsa-miR-2383     |
| NUDT3 | hsa-miR-384      |
| NUDT3 | hsa-miR-4279     |
| NUDT3 | hsa-miR-4802-5p  |
| NUDT3 | hsa-let-7ag-3p   |
| NUDT3 | hsa-miR-7201-5p  |
| NUDT3 | hsa-miR-4430     |
| NUDT3 | hsa-miR-8862     |
| NUDT3 | hsa-miR-4494     |
| NUDT3 | hsa-miR-500b-5p  |
| NUDT3 | hsa-miR-2411-5p  |
| NUDT3 | hsa-miR-7198-5p  |
| NUDT3 | hsa-miR-548b-3p  |
| NUDT3 | hsa-miR-7398i-3p |
| NUDT3 | hsa-miR-2891     |
| NUDT3 | hsa-miR-7226-5p  |
| NUDT3 | hsa-miR-6739-5p  |
| NUDT3 | hsa-miR-2351     |
| NUDT3 | hsa-miR-6878-5p  |

|       |                  |
|-------|------------------|
| NUDT3 | hsa-miR-101a-5p  |
| NUDT3 | hsa-miR-6690-5p  |
| NUDT3 | hsa-miR-6761-5p  |
| NUDT3 | hsa-miR-6897-3p  |
| NUDT3 | hsa-miR-6912-5p  |
| NUDT3 | hsa-miR-200c-3p  |
| NUDT3 | hsa-miR-508-5p   |
| NUDT3 | hsa-miR-4659b-3p |
| NUDT3 | hsa-miR-548aq-3p |
| NUDT3 | hsa-miR-485      |
| NUDT3 | hsa-miR-3120-3p  |
| NUDT3 | hsa-miR-1651-5p  |
| NUDT3 | hsa-miR-5584-5p  |
| NUDT3 | hsa-miR-7386a-3p |
| NUDT3 | hsa-miR-2473     |
| NUDT3 | hsa-miR-8062     |
| NUDT3 | hsa-miR-3162-3p  |
| NUDT3 | hsa-miR-7224-3p  |
| NUDT3 | hsa-miR-7482-3p  |
| NUDT3 | hsa-miR-548s     |
| NUDT3 | hsa-miR-6859-5p  |
| NUDT3 | hsa-miR-548av-5p |
| NUDT3 | hsa-miR-3170     |
| NUDT3 | hsa-miR-411-5p   |
| NUDT3 | hsa-miR-616-3p   |
| NUDT3 | hsa-miR-4539     |
| NUDT3 | hsa-miR-8903     |
| NUDT3 | hsa-miR-1237-3p  |
| NUDT3 | hsa-miR-513c-3p  |
| NUDT3 | hsa-miR-2409     |
| NUDT3 | hsa-miR-605      |
| NUDT3 | hsa-miR-1-2-5p   |
| NUDT3 | hsa-miR-346-3p   |
| NUDT3 | hsa-miR-7273-5p  |
| NUDT3 | hsa-miR-1835     |
| NUDT3 | hsa-miR-4798-3p  |
| NUDT3 | hsa-miR-7269-3p  |
| NUDT3 | hsa-miR-3100-5p  |
| NUDT3 | hsa-miR-133b-5p  |
| NUDT3 | hsa-miR-5585-3p  |
| NUDT3 | hsa-miR-5125-5p  |
| NUDT3 | hsa-miR-7042-3p  |
| NUDT3 | hsa-miR-460-5p   |
| NUDT3 | hsa-miR-676-3p   |
| NUDT3 | hsa-miR-324-3p   |
| NUDT3 | hsa-miR-8885     |

|       |                   |
|-------|-------------------|
| NUDT3 | hsa-miR-1647      |
| NUDT3 | hsa-miR-532-3p    |
| NUDT3 | hsa-miR-376a-2-5p |
| NUDT3 | hsa-miR-8827      |
| NUDT3 | hsa-miR-1836      |
| NUDT3 | hsa-miR-4799-5p   |
| NUDT3 | hsa-miR-5007-5p   |
| NUDT3 | hsa-miR-518-5p    |
| NUDT3 | hsa-miR-3609      |
| NUDT3 | hsa-miR-193       |
| NUDT3 | hsa-miR-1343-5p   |
| NUDT3 | hsa-miR-192-3p    |
| NUDT3 | hsa-miR-105-5p    |
| NUDT3 | hsa-miR-6133      |
| NUDT3 | hsa-miR-6547-3p   |
| NUDT3 | hsa-miR-7341-5p   |
| NUDT3 | hsa-miR-7670-5p   |
| NUDT3 | hsa-miR-188-5p    |
| NUDT3 | hsa-miR-7675-3p   |
| NUDT3 | hsa-miR-3548      |
| NUDT3 | hsa-miR-376c-3p   |
| NUDT3 | hsa-miR-17-3p     |
| NUDT3 | hsa-miR-17        |
| NUDT3 | hsa-miR-4700-3p   |
| NUDT3 | hsa-miR-7386j-3p  |
| NUDT3 | hsa-miR-655-5p    |
| NUDT3 | hsa-miR-7174-5p   |
| NUDT3 | hsa-miR-5002-3p   |
| NUDT3 | hsa-miR-1248      |
| NUDT3 | hsa-miR-669       |
| NUDT3 | hsa-miR-6794-5p   |
| NUDT3 | hsa-miR-1783      |
| NUDT3 | hsa-miR-302a-5p   |
| NUDT3 | hsa-miR-9-3p      |
| NUDT3 | hsa-miR-4764-5p   |
| NUDT3 | hsa-miR-181a-2-3p |
| NUDT3 | hsa-miR-2290      |
| NUDT3 | hsa-miR-143-5p    |
| NUDT3 | hsa-miR-8895      |
| NUDT3 | hsa-miR-546       |
| NUDT3 | hsa-miR-758-5p    |
| NUDT3 | hsa-miR-6733-5p   |
| NUDT3 | hsa-miR-6953-3p   |
| NUDT3 | hsa-miR-134-5p    |
| NUDT3 | hsa-miR-93-5p     |
| NUDT3 | hsa-miR-7302-3p   |

|       |                  |
|-------|------------------|
| NUDT3 | hsa-miR-2889     |
| NUDT3 | hsa-miR-2285t    |
| NUDT3 | hsa-miR-6939-3p  |
| NUDT3 | hsa-miR-548b-5p  |
| NUDT3 | hsa-miR-30       |
| NUDT3 | hsa-miR-150-5p   |
| NUDT3 | hsa-miR-7682-3p  |
| NUDT3 | hsa-miR-5110     |
| NUDT3 | hsa-miR-2285aa   |
| NUDT3 | hsa-miR-7377-5p  |
| NUDT3 | hsa-miR-1178-3p  |
| NUDT3 | hsa-miR-4653-3p  |
| NUDT3 | hsa-miR-7473-5p  |
| NUDT3 | hsa-miR-484      |
| NUDT3 | hsa-miR-3072-3p  |
| NUDT3 | hsa-miR-2284s    |
| NUDT3 | hsa-miR-3189-5p  |
| NUDT3 | hsa-miR-562      |
| NUDT3 | hsa-miR-20-5p    |
| NUDT3 | hsa-miR-2459     |
| NUDT3 | hsa-miR-920      |
| NUDT3 | hsa-miR-669i     |
| NUDT3 | hsa-miR-219-1-3p |
| NUDT3 | hsa-miR-411-5p   |
| NUDT3 | hsa-miR-148a-3p  |
| NUDT3 | hsa-miR-6986-5p  |
| NUDT3 | hsa-miR-702-3p   |
| NUDT3 | hsa-miR-3153     |
| NUDT3 | hsa-miR-329-3p   |
| NUDT3 | hsa-miR-679      |
| NUDT3 | hsa-miR-429-3p   |
| NUDT3 | hsa-miR-7178-3p  |
| NUDT3 | hsa-miR-3148     |
| NUDT3 | hsa-miR-4477b    |
| NUDT3 | hsa-miR-569      |
| NUDT3 | hsa-miR-8805     |
| NUDT3 | hsa-miR-7398u-3p |
| NUDT3 | hsa-miR-4687-5p  |
| NUDT3 | hsa-miR-548ap-5p |
| NUDT3 | hsa-miR-4788     |
| NUDT3 | hsa-miR-4714-3p  |
| NUDT3 | hsa-miR-2284n    |
| NUDT3 | hsa-miR-5588-5p  |
| NUDT3 | hsa-miR-6817-3p  |
| NUDT3 | hsa-miR-432-3p   |
| NUDT3 | hsa-miR-3607-5p  |



|       |                  |
|-------|------------------|
| NUDT3 | hsa-miR-18b-3p   |
| NUDT3 | hsa-miR-6608-5p  |
| NUDT3 | hsa-miR-362-5p   |
| NUDT3 | hsa-miR-7262b-5p |
| NUDT3 | hsa-miR-4489     |
| NUDT3 | hsa-miR-181b-3p  |
| NUDT3 | hsa-miR-4320     |
| NUDT3 | hsa-miR-589-5p   |
| NUDT3 | hsa-miR-2458     |
| NUDT3 | hsa-miR-6669-3p  |
| NUDT3 | hsa-miR-619      |
| NUDT3 | hsa-miR-4483     |
| NUDT3 | hsa-miR-6832-5p  |
| NUDT3 | hsa-miR-7341-3p  |
| NUDT3 | hsa-miR-22-5p    |
| NUDT3 | hsa-miR-6643-5p  |
| NUDT3 | hsa-miR-6766-5p  |
| NUDT3 | hsa-miR-138-1-3p |
| NUDT3 | hsa-miR-216a     |
| NUDT3 | hsa-miR-4775     |
| NUDT3 | hsa-miR-6758-5p  |
| NUDT3 | hsa-miR-6875-3p  |
| NUDT3 | hsa-miR-548aw    |
| NUDT3 | hsa-miR-2285b    |
| NUDT3 | hsa-miR-1197     |
| NUDT3 | hsa-miR-6333     |
| NUDT3 | hsa-miR-6787-3p  |
| NUDT3 | hsa-miR-2323     |
| NUDT3 | hsa-miR-921      |
| NUDT3 | hsa-miR-653-5p   |
| NUDT3 | hsa-miR-656      |
| NUDT3 | hsa-miR-7179-3p  |
| NUDT3 | hsa-miR-6396     |
| NUDT3 | hsa-miR-369-5p   |
| NUDT3 | hsa-miR-370-5p   |
| NUDT3 | hsa-miR-7207-5p  |
| NUDT3 | hsa-miR-542-3p   |
| NUDT3 | hsa-miR-5697-5p  |
| NUDT3 | hsa-miR-6737-5p  |
| NUDT3 | hsa-miR-7398k-5p |
| NUDT3 | hsa-miR-2313-3p  |
| NUDT3 | hsa-miR-550a-3p  |
| NUDT3 | hsa-miR-452-5p   |
| NUDT3 | hsa-miR-128-3p   |
| NUDT3 | hsa-miR-758-3p   |
| NUDT3 | hsa-miR-3133     |

|       |                  |
|-------|------------------|
| NUDT3 | hsa-miR-1284     |
| NUDT3 | hsa-miR-4708-3p  |
| NUDT3 | hsa-miR-302d-5p  |
| NUDT3 | hsa-miR-8075     |
| NUDT3 | hsa-miR-1434-3p  |
| NUDT3 | hsa-miR-5190     |
| NUDT3 | hsa-miR-8908-5p  |
| NUDT3 | hsa-miR-3613-5p  |
| NUDT3 | hsa-miR-6701-3p  |
| NUDT3 | hsa-miR-4436b-5p |
| NUDT3 | hsa-miR-668-3p   |
| NUDT3 | hsa-miR-545-3p   |
| NUDT3 | hsa-miR-3975     |
| NUDT3 | hsa-miR-5582-3p  |
| NUDT3 | hsa-miR-1976     |
| NUDT3 | hsa-miR-4715-5p  |
| NUDT3 | hsa-miR-344eh-5p |
| NUDT3 | hsa-miR-7090-5p  |
| NUDT3 | hsa-miR-4698     |
| NUDT3 | hsa-miR-8116     |
| NUDT3 | hsa-miR-7235-5p  |
| NUDT3 | hsa-miR-7665-3p  |
| NUDT3 | hsa-miR-7110-3p  |
| NUDT3 | hsa-miR-142-3p   |
| NUDT3 | hsa-miR-7359-5p  |
| NUDT3 | hsa-miR-2285x    |
| NUDT3 | hsa-miR-7087-3p  |
| NUDT3 | hsa-miR-410-3p   |
| NUDT3 | hsa-miR-924      |
| NUDT3 | hsa-miR-8868     |
| NUDT3 | hsa-miR-6885-3p  |
| NUDT3 | hsa-miR-624-3p   |
| NUDT3 | hsa-miR-8485     |
| NUDT3 | hsa-miR-4777-5p  |
| NUDT3 | hsa-miR-489      |
| NUDT3 | hsa-miR-8061     |
| NUDT3 | hsa-miR-8906     |
| NUDT3 | hsa-miR-4742-3p  |
| NUDT3 | hsa-miR-3606-5p  |
| NUDT3 | hsa-miR-666-5p   |
| NUDT3 | hsa-miR-425-3p   |
| NUDT3 | hsa-miR-7464-3p  |
| NUDT3 | hsa-miR-130      |
| NUDT3 | hsa-miR-30c-3p   |
| NUDT3 | hsa-miR-3097-5p  |
| NUDT3 | hsa-miR-1246     |

|       |                  |
|-------|------------------|
| NUDT3 | hsa-miR-3191-5p  |
| NUDT3 | hsa-miR-1267     |
| NUDT3 | hsa-miR-7261-5p  |
| NUDT3 | hsa-miR-7250-3p  |
| NUDT3 | hsa-miR-4771     |
| NUDT3 | hsa-miR-3126-5p  |
| NUDT3 | hsa-miR-105b     |
| NUDT3 | hsa-miR-580-5p   |
| NUDT3 | hsa-miR-6925-5p  |
| NUDT3 | hsa-miR-302      |
| NUDT3 | hsa-miR-591      |
| NUDT3 | hsa-miR-6373     |
| NUDT3 | hsa-miR-561-3p   |
| NUDT3 | hsa-miR-1599     |
| NUDT3 | hsa-miR-6965-5p  |
| NUDT3 | hsa-miR-599-3p   |
| NUDT3 | hsa-miR-3085-3p  |
| NUDT3 | hsa-miR-513b-5p  |
| NUDT3 | hsa-miR-2399-3p  |
| NUDT3 | hsa-miR-5699-3p  |
| NUDT3 | hsa-miR-2897     |
| NUDT3 | hsa-miR-1236-3p  |
| NUDT3 | hsa-miR-378      |
| NUDT3 | hsa-miR-336-5p   |
| NUDT3 | hsa-miR-7332-5p  |
| NUDT3 | hsa-miR-3167-5p  |
| NUDT3 | hsa-miR-7160-5p  |
| NUDT3 | hsa-miR-3646     |
| NUDT3 | hsa-miR-4284     |
| NUDT3 | hsa-miR-7394a-5p |
| NUDT3 | hsa-miR-7271-3p  |
| NUDT3 | hsa-miR-5187-5p  |
| NUDT3 | hsa-miR-2314     |
| NUDT3 | hsa-miR-513a-3p  |
| NUDT3 | hsa-miR-888-5p   |
| NUDT3 | hsa-miR-4433a-5p |
| NUDT3 | hsa-miR-6628-3p  |
| NUDT3 | hsa-miR-3160-5p  |
| NUDT3 | hsa-miR-7398-5p  |
| NUDT3 | hsa-miR-8852     |
| NUDT3 | hsa-miR-2285e    |
| NUDT3 | hsa-miR-1225-5p  |
| NUDT3 | hsa-miR-6764-3p  |
| NUDT3 | hsa-miR-6985-5p  |
| NUDT3 | hsa-miR-126b-5p  |
| NUDT3 | hsa-miR-584-3p   |

|       |                  |
|-------|------------------|
| NUDT3 | hsa-miR-433      |
| NUDT3 | hsa-miR-3098-3p  |
| NUDT3 | hsa-miR-452-5p   |
| NUDT3 | hsa-miR-7324-3p  |
| NUDT3 | hsa-miR-6778-5p  |
| NUDT3 | hsa-miR-764      |
| NUDT3 | hsa-miR-2357     |
| NUDT3 | hsa-miR-134      |
| NUDT3 | hsa-miR-8106     |
| NUDT3 | hsa-miR-6831-5p  |
| NUDT3 | hsa-miR-6765-5p  |
| NUDT3 | hsa-miR-2367-3p  |
| NUDT3 | hsa-miR-196b-3p  |
| NUDT3 | hsa-miR-1303     |
| NUDT3 | hsa-miR-2442     |
| NUDT3 | hsa-miR-7371-5p  |
| NUDT3 | hsa-miR-6575-5p  |
| NUDT3 | hsa-miR-5095     |
| NUDT3 | hsa-miR-7322-3p  |
| NUDT3 | hsa-miR-6997-3p  |
| NUDT3 | hsa-miR-4270     |
| NUDT3 | hsa-miR-6090     |
| NUDT3 | hsa-miR-582-3p   |
| NUDT3 | hsa-miR-1646     |
| NUDT3 | hsa-miR-8816     |
| NUDT3 | hsa-miR-183-5p   |
| NUDT3 | hsa-miR-934-3p   |
| NUDT3 | hsa-miR-7398p-3p |
| NUDT3 | hsa-miR-6936-5p  |
| NUDT3 | hsa-miR-31-5p    |
| NUDT3 | hsa-miR-7256-3p  |
| NUDT3 | hsa-miR-6944-5p  |
| NUDT3 | hsa-miR-2485     |
| NUDT3 | hsa-miR-1252     |
| NUDT3 | hsa-miR-2894     |
| NUDT3 | hsa-miR-181-3p   |
| NUDT3 | hsa-miR-18-5p    |
| NUDT3 | hsa-miR-6842-3p  |
| NUDT3 | hsa-miR-31-5p    |
| NUDT3 | hsa-miR-4774-5p  |
| NUDT3 | hsa-miR-2455     |
| NUDT3 | hsa-miR-7662-5p  |
| NUDT3 | hsa-miR-1252-3p  |
| NUDT3 | hsa-miR-6949-5p  |
| NUDT3 | hsa-miR-4268     |
| NUDT3 | hsa-miR-487a-5p  |

|       |                  |
|-------|------------------|
| NUDT3 | hsa-miR-7159-5p  |
| NUDT3 | hsa-miR-3714     |
| NUDT3 | hsa-miR-3569-3p  |
| NUDT3 | hsa-miR-6755-5p  |
| NUDT3 | hsa-miR-302c-3p  |
| NUDT3 | hsa-miR-186-3p   |
| NUDT3 | hsa-miR-1307-3p  |
| NUDT3 | hsa-miR-766-3p   |
| NUDT3 | hsa-miR-7092-5p  |
| NUDT3 | hsa-miR-669e-5p  |
| NUDT3 | hsa-miR-742-5p   |
| NUDT3 | hsa-miR-214-3p   |
| NUDT3 | hsa-miR-3087-3p  |
| NUDT3 | hsa-miR-4732-5p  |
| NUDT3 | hsa-miR-8863     |
| NUDT3 | hsa-miR-4428     |
| NUDT3 | hsa-miR-5011-5p  |
| NUDT3 | hsa-miR-7011-3p  |
| NUDT3 | hsa-miR-7205-3p  |
| NUDT3 | hsa-miR-1224-5p  |
| NUDT3 | hsa-miR-128-1-5p |
| NUDT3 | hsa-miR-7083-3p  |
| NUDT3 | hsa-miR-4422     |
| NUDT3 | hsa-miR-7845-5p  |
| NUDT3 | hsa-miR-489-3p   |
| NUDT3 | hsa-miR-1245a    |
| NUDT3 | hsa-miR-3927-3p  |
| NUDT3 | hsa-miR-2681-3p  |
| NUDT3 | hsa-miR-3059-5p  |
| NUDT3 | hsa-miR-330-5p   |
| NUDT3 | hsa-miR-502a     |
| NUDT3 | hsa-miR-3675-5p  |
| NUDT3 | hsa-miR-548e-5p  |
| NUDT3 | hsa-miR-5583-5p  |
| NUDT3 | hsa-miR-150-5p   |
| NUDT3 | hsa-miR-29a-3p   |
| NUDT3 | hsa-miR-4656     |
| NUDT3 | hsa-miR-548ad-5p |
| NUDT3 | hsa-miR-2115-5p  |
| NUDT3 | hsa-miR-5046     |
| NUDT3 | hsa-miR-7005-5p  |
| NUDT3 | hsa-miR-632      |
| NUDT3 | hsa-miR-1804     |
| NUDT3 | hsa-miR-27       |
| NUDT3 | hsa-miR-7667-3p  |
| NUDT3 | hsa-miR-7347-3p  |

|       |                  |
|-------|------------------|
| NUDT3 | hsa-miR-3165     |
| NUDT3 | hsa-miR-6728-3p  |
| NUDT3 | hsa-miR-29a-5p   |
| NUDT3 | hsa-miR-7677-3p  |
| NUDT3 | hsa-miR-1643-3p  |
| NUDT3 | hsa-miR-3942-3p  |
| NUDT3 | hsa-miR-5010-3p  |
| NUDT3 | hsa-miR-8099     |
| NUDT3 | hsa-miR-7338-5p  |
| NUDT3 | hsa-miR-2287     |
| NUDT3 | hsa-miR-7328-3p  |
| NUDT3 | hsa-miR-217      |
| NUDT3 | hsa-miR-106a-3p  |
| NUDT3 | hsa-miR-6731-5p  |
| NUDT3 | hsa-miR-6730-5p  |
| NUDT3 | hsa-miR-8055     |
| NUDT3 | hsa-miR-373-3p   |
| NUDT3 | hsa-miR-551-5p   |
| NUDT3 | hsa-miR-1909-3p  |
| NUDT3 | hsa-miR-7204-3p  |
| NUDT3 | hsa-miR-344-3p   |
| NUDT3 | hsa-miR-4474-3p  |
| NUDT3 | hsa-miR-6844     |
| NUDT3 | hsa-miR-30e      |
| NUDT3 | hsa-miR-6741-3p  |
| NUDT3 | hsa-miR-6811-3p  |
| NUDT3 | hsa-miR-5000-5p  |
| NUDT3 | hsa-miR-5112     |
| NUDT3 | hsa-miR-2325     |
| NUDT3 | hsa-miR-6397     |
| NUDT3 | hsa-miR-4722-5p  |
| NUDT3 | hsa-miR-106b-5p  |
| NUDT3 | hsa-miR-7159-3p  |
| NUDT3 | hsa-miR-7362-3p  |
| NUDT3 | hsa-miR-7663-3p  |
| NUDT3 | hsa-miR-6797-5p  |
| NUDT3 | hsa-miR-302-3p   |
| NUDT3 | hsa-miR-300-5p   |
| NUDT3 | hsa-miR-7386m-3p |
| NUDT3 | hsa-miR-362-3p   |
| NUDT3 | hsa-miR-27a-5p   |
| NUDT3 | hsa-miR-3935     |
| NUDT3 | hsa-miR-7085-3p  |
| NUDT3 | hsa-miR-5580-5p  |
| NUDT3 | hsa-miR-2284v    |
| NUDT3 | hsa-miR-4743-3p  |

|       |                  |
|-------|------------------|
| NUDT3 | hsa-miR-1943-5p  |
| NUDT3 | hsa-miR-7194-3p  |
| NUDT3 | hsa-miR-6881-5p  |
| NUDT3 | hsa-miR-3192-3p  |
| NUDT3 | hsa-miR-875-3p   |
| NUDT3 | hsa-miR-4720-5p  |
| NUDT3 | hsa-miR-2312     |
| NUDT3 | hsa-miR-328-3p   |
| NUDT3 | hsa-miR-7169-5p  |
| NUDT3 | hsa-miR-7277-3p  |
| NUDT3 | hsa-miR-23       |
| NUDT3 | hsa-miR-21-5p    |
| NUDT3 | hsa-miR-1329-5p  |
| NUDT3 | hsa-miR-873-5p.1 |
| NUDT3 | hsa-miR-618      |
| NUDT3 | hsa-miR-7118-5p  |
| NUDT3 | hsa-miR-1674     |
| NUDT3 | hsa-miR-4733-5p  |
| NUDT3 | hsa-miR-3473c    |
| NUDT3 | hsa-miR-1260a    |
| NUDT3 | hsa-miR-411a     |
| NUDT3 | hsa-miR-1704     |
| NUDT3 | hsa-miR-666-3p   |
| NUDT3 | hsa-miR-7398l-5p |
| NUDT3 | hsa-miR-4502     |
| NUDT3 | hsa-miR-6900-5p  |
| NUDT3 | hsa-miR-4776-3p  |
| NUDT3 | hsa-miR-4709-5p  |
| NUDT3 | hsa-miR-7281-5p  |
| NUDT3 | hsa-miR-664-5p   |
| NUDT3 | hsa-miR-346      |
| NUDT3 | hsa-miR-3061-5p  |
| NUDT3 | hsa-miR-4790-3p  |
| NUDT3 | hsa-miR-1193-5p  |
| NUDT3 | hsa-miR-6578-3p  |
| NUDT3 | hsa-miR-3652     |
| NUDT3 | hsa-miR-7017-5p  |
| NUDT3 | hsa-miR-6873-3p  |
| NUDT3 | hsa-miR-7001-3p  |
| NUDT3 | hsa-miR-6925-3p  |
| NUDT3 | hsa-miR-4659a-5p |
| NUDT3 | hsa-miR-570-3p   |
| NUDT3 | hsa-miR-7034-5p  |
| NUDT3 | hsa-miR-486-5p   |
| NUDT3 | hsa-miR-2454-5p  |
| NUDT3 | hsa-miR-8834b    |

|       |                  |
|-------|------------------|
| NUDT3 | hsa-miR-4693-5p  |
| NUDT3 | hsa-miR-8845     |
| NUDT3 | hsa-miR-8832     |
| NUDT3 | hsa-miR-301b-5p  |
| NUDT3 | hsa-miR-124      |
| NUDT3 | hsa-miR-6744-3p  |
| NUDT3 | hsa-miR-521      |
| NUDT3 | hsa-miR-7448-3p  |
| NUDT3 | hsa-miR-4455     |
| NUDT3 | hsa-miR-2360     |
| NUDT3 | hsa-miR-7015-3p  |
| NUDT3 | hsa-miR-4740-3p  |
| NUDT3 | hsa-miR-4764-3p  |
| NUDT3 | hsa-miR-1290     |
| NUDT3 | hsa-miR-331-5p   |
| NUDT3 | hsa-miR-20       |
| NUDT3 | hsa-miR-6992-3p  |
| NUDT3 | hsa-miR-6127     |
| NUDT3 | hsa-miR-5197-3p  |
| NUDT3 | hsa-miR-378g     |
| NUDT3 | hsa-miR-215-3p   |
| NUDT3 | hsa-miR-471-3p   |
| NUDT3 | hsa-miR-495-3p   |
| NUDT3 | hsa-miR-7186-3p  |
| NUDT3 | hsa-miR-7386d-5p |
| NUDT3 | hsa-miR-2325b    |
| NUDT3 | hsa-miR-3613b    |
| NUDT3 | hsa-miR-3672     |
| NUDT3 | hsa-miR-5709-3p  |
| NUDT3 | hsa-miR-7381-3p  |
| NUDT3 | hsa-miR-320e     |
| NUDT3 | hsa-miR-4667-5p  |
| NUDT3 | hsa-miR-7288-5p  |
| NUDT3 | hsa-miR-149-3p   |
| NUDT3 | hsa-miR-4297     |
| NUDT3 | hsa-miR-4753-5p  |
| NUDT3 | hsa-miR-1296-3p  |
| NUDT3 | hsa-miR-525-5p   |
| NUDT3 | hsa-miR-6239     |
| NUDT3 | hsa-miR-676-5p   |
| NUDT3 | hsa-miR-27-3p    |
| NUDT3 | hsa-miR-3473be   |
| NUDT3 | hsa-miR-804      |
| NUDT3 | hsa-miR-6612-5p  |
| NUDT3 | hsa-miR-539-5p   |
| NUDT3 | hsa-miR-1929-5p  |



|       |                  |
|-------|------------------|
| NUDT3 | hsa-miR-7399-5p  |
| NUDT3 | hsa-miR-670-3p   |
| NUDT3 | hsa-miR-6605-5p  |
| NUDT3 | hsa-miR-7398o-5p |
| NUDT3 | hsa-miR-7279-3p  |
| NUDT3 | hsa-miR-7578     |
| NUDT3 | hsa-miR-3941     |
| NUDT3 | hsa-miR-218-5p   |
| NUDT3 | hsa-miR-548aq-5p |
| NUDT3 | hsa-let-7e-3p    |
| NUDT3 | hsa-miR-7151-3p  |
| NUDT3 | hsa-miR-431-5p   |
| NUDT3 | hsa-miR-1-3p     |
| NUDT3 | hsa-miR-383-3p   |
| NUDT3 | hsa-miR-2325c    |
| NUDT3 | hsa-miR-518a-5p  |
| NUDT3 | hsa-miR-6768-5p  |
| NUDT3 | hsa-miR-4261     |
| NUDT3 | hsa-miR-1299     |
| NUDT3 | hsa-miR-7109-5p  |
| NUDT3 | hsa-miR-6899-5p  |
| NUDT3 | hsa-miR-6923-5p  |
| NUDT3 | hsa-miR-6946-5p  |
| NUDT3 | hsa-miR-6978-5p  |
| NUDT3 | hsa-miR-4720-3p  |
| NUDT3 | hsa-miR-1737     |
| NUDT3 | hsa-miR-507      |
| NUDT3 | hsa-miR-140-3p.1 |
| NUDT3 | hsa-miR-2378     |
| NUDT3 | hsa-miR-7703     |
| NUDT3 | hsa-miR-642      |
| NUDT3 | hsa-miR-21-3p    |
| NUDT3 | hsa-miR-4280     |
| NUDT3 | hsa-miR-17-5p    |
| NUDT3 | hsa-miR-216      |
| NUDT3 | hsa-miR-3689b-5p |
| NUDT3 | hsa-miR-487a     |
| NUDT3 | hsa-miR-5682     |
| NUDT3 | hsa-miR-30-5p    |
| NUDT3 | hsa-miR-623      |
| NUDT3 | hsa-miR-3958     |
| NUDT3 | hsa-miR-7340-5p  |
| NUDT3 | hsa-miR-7455-5p  |
| NUDT3 | hsa-miR-4774-3p  |
| NUDT3 | hsa-miR-876      |
| NUDT3 | hsa-miR-3110-3p  |

|       |                   |
|-------|-------------------|
| NUDT3 | hsa-miR-6920-3p   |
| NUDT3 | hsa-miR-323       |
| NUDT3 | hsa-miR-2475      |
| NUDT3 | hsa-miR-6542-5p   |
| NUDT3 | hsa-miR-193a      |
| NUDT3 | hsa-miR-138-2-3p  |
| NUDT3 | hsa-miR-5622-5p   |
| NUDT3 | hsa-miR-7258-5p   |
| NUDT3 | hsa-miR-6798-5p   |
| NUDT3 | hsa-miR-1306-3p   |
| NUDT3 | hsa-miR-1245b-3p  |
| NUDT3 | hsa-miR-19-5p     |
| NUDT3 | hsa-miR-139-3p    |
| NUDT3 | hsa-miR-7398t-3p  |
| NUDT3 | hsa-miR-6848-5p   |
| NUDT3 | hsa-miR-101-3p.2  |
| NUDT3 | hsa-miR-1288-5p   |
| NUDT3 | hsa-miR-7156-5p   |
| NUDT3 | hsa-miR-301-3p    |
| NUDT3 | hsa-miR-8902      |
| NUDT3 | hsa-miR-3125      |
| NUDT3 | hsa-miR-4690-5p   |
| NUDT3 | hsa-miR-2329-3p   |
| NUDT3 | hsa-miR-7398m-3p  |
| NUDT3 | hsa-miR-7350-5p   |
| NUDT3 | hsa-miR-34bc-3p   |
| NUDT3 | hsa-miR-592-3p    |
| NUDT3 | hsa-miR-106-5p    |
| NUDT3 | hsa-miR-744-3p    |
| NUDT3 | hsa-miR-4450      |
| NUDT3 | hsa-miR-544-5p    |
| NUDT3 | hsa-miR-125b-2-3p |
| NUDT3 | hsa-miR-7077-3p   |
| NUDT3 | hsa-miR-1285-3p   |
| NUDT3 | hsa-miR-6516-5p   |
| NUDT3 | hsa-miR-874-3p    |
| NUDT3 | hsa-miR-7456-3p   |
| NUDT3 | hsa-miR-488-5p    |
| NUDT3 | hsa-miR-2410      |
| NUDT3 | hsa-miR-298-3p    |
| NUDT3 | hsa-miR-1256      |
| NUDT3 | hsa-miR-668       |
| NUDT3 | hsa-miR-1769-3p   |
| NUDT3 | hsa-miR-1664-5p   |
| NUDT3 | hsa-miR-548ar-5p  |
| NUDT3 | hsa-miR-539-5p    |

|       |                  |
|-------|------------------|
| NUDT3 | hsa-miR-587      |
| NUDT3 | hsa-miR-7035-3p  |
| NUDT3 | hsa-miR-3620-5p  |
| NUDT3 | hsa-miR-2418     |
| NUDT3 | hsa-miR-6982-3p  |
| NUDT3 | hsa-miR-548c-3p  |
| NUDT3 | hsa-miR-642-3p   |
| NUDT3 | hsa-miR-7303-5p  |
| NUDT3 | hsa-miR-7214-5p  |
| NUDT3 | hsa-miR-3060-3p  |
| NUDT3 | hsa-miR-185-3p   |
| NUDT3 | hsa-miR-4635     |
| NUDT3 | hsa-miR-7461-3p  |
| NUDT3 | hsa-miR-152-3p   |
| NUDT3 | hsa-miR-681      |
| NUDT3 | hsa-miR-7185-3p  |
| NUDT3 | hsa-miR-1-5p     |
| NUDT3 | hsa-miR-7202-3p  |
| NUDT3 | hsa-miR-138-5p   |
| NUDT3 | hsa-miR-7026-5p  |
| NUDT3 | hsa-miR-1739     |
| NUDT3 | hsa-miR-7287-5p  |
| NUDT3 | hsa-miR-4779     |
| NUDT3 | hsa-miR-2285z    |
| NUDT3 | hsa-miR-2346     |
| NUDT3 | hsa-miR-4274     |
| NUDT3 | hsa-miR-1240     |
| NUDT3 | hsa-miR-2285g    |
| NUDT3 | hsa-miR-193-3p   |
| NUDT3 | hsa-miR-1298-3p  |
| NUDT3 | hsa-miR-4470     |
| NUDT3 | hsa-miR-1287-5p  |
| NUDT3 | hsa-miR-7686-5p  |
| NUDT3 | hsa-miR-4762-3p  |
| NUDT3 | hsa-miR-6556-5p  |
| NUDT3 | hsa-miR-7319-5p  |
| NUDT3 | hsa-miR-374b-3p  |
| NUDT3 | hsa-miR-2285k    |
| NUDT3 | hsa-miR-4728-5p  |
| NUDT3 | hsa-miR-338-3p   |
| NUDT3 | hsa-miR-519d-5p  |
| NUDT3 | hsa-miR-7388c-5p |
| NUDT3 | hsa-miR-2423     |
| NUDT3 | hsa-miR-764-5p   |
| NUDT3 | hsa-miR-2315     |
| NUDT3 | hsa-miR-7398q-3p |

|       |                   |
|-------|-------------------|
| NUDT3 | hsa-miR-4766-3p   |
| NUDT3 | hsa-miR-98-5p     |
| NUDT3 | hsa-miR-7646-5p   |
| NUDT3 | hsa-miR-4742      |
| NUDT3 | hsa-miR-4509      |
| NUDT3 | hsa-miR-3671      |
| NUDT3 | hsa-miR-7166-5p   |
| NUDT3 | hsa-miR-3591-3p   |
| NUDT3 | hsa-miR-491-5p    |
| NUDT3 | hsa-miR-5125      |
| NUDT3 | hsa-miR-873a-5p.1 |
| NUDT3 | hsa-miR-187-5p    |
| NUDT3 | hsa-miR-1956-3p   |
| NUDT3 | hsa-miR-1757      |
| NUDT3 | hsa-miR-7371-3p   |
| NUDT3 | hsa-miR-7286-3p   |
| NUDT3 | hsa-miR-3064-3p   |
| NUDT3 | hsa-miR-8892      |
| NUDT3 | hsa-miR-4685-3p   |
| NUDT3 | hsa-miR-19-3p     |
| NUDT3 | hsa-miR-6512-5p   |
| NUDT3 | hsa-miR-8819      |
| NUDT3 | hsa-miR-345-3p    |
| NUDT3 | hsa-miR-194-3p    |
| NUDT3 | hsa-miR-2396      |
| NUDT3 | hsa-miR-3177-5p   |
| NUDT3 | hsa-miR-508-3p    |
| NUDT3 | hsa-miR-8052      |
| NUDT3 | hsa-miR-3944-5p   |
| NUDT3 | hsa-miR-1286      |
| NUDT3 | hsa-miR-7386k-5p  |
| NUDT3 | hsa-miR-195-3p    |
| NUDT3 | hsa-miR-548aa     |
| NUDT3 | hsa-miR-1838      |
| NUDT3 | hsa-miR-2284-3p   |
| NUDT3 | hsa-miR-7361-3p   |
| NUDT3 | hsa-miR-1908-5p   |
| NUDT3 | hsa-miR-6754-3p   |
| NUDT3 | hsa-miR-8802      |
| NUDT3 | hsa-miR-942-5p    |
| NUDT3 | hsa-miR-374a-3p   |
| NUDT3 | hsa-miR-7674-5p   |
| NUDT3 | hsa-miR-200b-3p   |
| NUDT3 | hsa-miR-4511      |
| NUDT3 | hsa-miR-563       |
| NUDT3 | hsa-miR-1185-5p   |

|       |                  |
|-------|------------------|
| NUDT3 | hsa-miR-3596     |
| NUDT3 | hsa-miR-7195-5p  |
| NUDT3 | hsa-miR-7170-5p  |
| NUDT3 | hsa-miR-3569     |
| NUDT3 | hsa-miR-380-3p   |
| NUDT3 | hsa-miR-7974     |
| NUDT3 | hsa-miR-4638-3p  |
| NUDT3 | hsa-miR-518-3p   |
| NUDT3 | hsa-miR-103      |
| NUDT3 | hsa-miR-490-3p   |
| NUDT3 | hsa-miR-378d     |
| NUDT3 | hsa-miR-7849-3p  |
| NUDT3 | hsa-miR-6740-5p  |
| NUDT3 | hsa-miR-15-5p    |
| NUDT3 | hsa-miR-181-5p   |
| NUDT3 | hsa-miR-943      |
| NUDT3 | hsa-miR-516a     |
| NUDT3 | hsa-miR-7345-3p  |
| NUDT3 | hsa-miR-1273e    |
| NUDT3 | hsa-miR-330-3p.2 |
| NUDT3 | hsa-miR-670      |
| NUDT3 | hsa-miR-6768-3p  |
| NUDT3 | hsa-miR-1295b-5p |
| NUDT3 | hsa-miR-7386k-3p |
| NUDT3 | hsa-miR-6857-5p  |
| NUDT3 | hsa-miR-7191-3p  |
| NUDT3 | hsa-miR-3622b-5p |
| NUDT3 | hsa-miR-148      |
| NUDT3 | hsa-miR-2310     |
| NUDT3 | hsa-miR-5697-3p  |
| NUDT3 | hsa-miR-3604     |
| NUDT3 | hsa-miR-3559-5p  |
| NUDT3 | hsa-miR-1227-3p  |
| NUDT3 | hsa-miR-6908-3p  |
| NUDT3 | hsa-miR-719      |
| NUDT3 | hsa-miR-548az-5p |
| NUDT3 | hsa-miR-8880     |
| NUDT3 | hsa-miR-6750-3p  |
| NUDT3 | hsa-miR-942-3p   |
| NUDT3 | hsa-miR-6515-3p  |
| NUDT3 | hsa-miR-762      |
| NUDT3 | hsa-miR-6518     |
| NUDT3 | hsa-miR-2400     |
| NUDT3 | hsa-miR-4423     |
| NUDT3 | hsa-miR-6544-3p  |
| NUDT3 | hsa-miR-532-5p   |

|       |                   |
|-------|-------------------|
| NUDT3 | hsa-miR-4520-3p   |
| NUDT3 | hsa-miR-583       |
| NUDT3 | hsa-miR-548q      |
| NUDT3 | hsa-miR-3911      |
| NUDT3 | hsa-miR-7360-5p   |
| NUDT3 | hsa-miR-7164-5p   |
| NUDT3 | hsa-miR-130-5p    |
| NUDT3 | hsa-miR-7221-5p   |
| NUDT3 | hsa-miR-1912-3p   |
| NUDT3 | hsa-miR-4501      |
| NUDT3 | hsa-miR-4480      |
| NUDT3 | hsa-miR-1193      |
| NUDT3 | hsa-miR-5690      |
| NUDT3 | hsa-miR-6780a-5p  |
| NUDT3 | hsa-miR-7106-3p   |
| NUDT3 | hsa-miR-2284c     |
| NUDT3 | hsa-miR-335-5p    |
| NUDT3 | hsa-miR-802-3p    |
| NUDT3 | hsa-miR-6508-5p   |
| NUDT3 | hsa-miR-6871-5p   |
| NUDT3 | hsa-miR-371b-3p   |
| NUDT3 | hsa-miR-381-3p    |
| NUDT3 | hsa-miR-2368-3p   |
| NUDT3 | hsa-miR-146-5p    |
| NUDT3 | hsa-miR-503-3p    |
| NUDT3 | hsa-miR-1298      |
| NUDT3 | hsa-miR-1902      |
| NUDT3 | hsa-miR-7074-3p   |
| NUDT3 | hsa-miR-1933-3p   |
| NUDT3 | hsa-miR-1298-5p   |
| NUDT3 | hsa-miR-7018-3p   |
| NUDT3 | hsa-miR-3192-5p   |
| NUDT3 | hsa-miR-101-3p.1  |
| NUDT3 | hsa-miR-135a-1-3p |
| NUDT3 | hsa-miR-372-3p    |
| NUDT3 | hsa-miR-5581-3p   |
| NUDT3 | hsa-miR-516b-3p   |
| NUDT3 | hsa-miR-3925-5p   |
| NUDT3 | hsa-miR-1982-3p   |
| NUDT3 | hsa-miR-5107-5p   |
| NUDT3 | hsa-miR-429       |
| NUDT3 | hsa-miR-2343      |
| NUDT3 | hsa-miR-4642      |
| NUDT3 | hsa-miR-320a      |
| NUDT3 | hsa-miR-151-3p    |
| NUDT3 | hsa-miR-6747-5p   |

|       |                  |
|-------|------------------|
| NUDT3 | hsa-miR-4448     |
| NUDT3 | hsa-miR-6878-3p  |
| NUDT3 | hsa-miR-3120-3p  |
| NUDT3 | hsa-miR-524-5p   |
| NUDT3 | hsa-miR-2419-3p  |
| NUDT3 | hsa-miR-365-3p   |
| NUDT3 | hsa-miR-548aj-5p |
| NUDT3 | hsa-let-7-5p     |
| NUDT3 | hsa-miR-2463     |
| NUDT3 | hsa-miR-2340     |
| NUDT3 | hsa-miR-8792     |
| NUDT3 | hsa-miR-544a     |
| NUDT3 | hsa-miR-6587-5p  |
| NUDT3 | hsa-miR-190-3p   |
| NUDT3 | hsa-miR-1814a    |
| NUDT3 | hsa-miR-499-5p   |
| NUDT3 | hsa-miR-5586-5p  |
| NUDT3 | hsa-miR-4668-3p  |
| NUDT3 | hsa-miR-4311     |
| NUDT3 | hsa-miR-8844     |
| NUDT3 | hsa-miR-502-3p   |
| NUDT3 | hsa-miR-6337     |
| NUDT3 | hsa-miR-431-5p   |
| NUDT3 | hsa-miR-8848     |
| NUDT3 | hsa-miR-291-3p   |
| NUDT3 | hsa-miR-148b-3p  |
| NUDT3 | hsa-miR-656-3p   |
| NUDT3 | hsa-miR-6845-5p  |
| NUDT3 | hsa-miR-2322-5p  |
| NUDT3 | hsa-miR-3190-5p  |
| NUDT3 | hsa-miR-7166-3p  |
| NUDT3 | hsa-miR-4762-5p  |
| NUDT3 | hsa-miR-149-5p   |
| NUDT3 | hsa-miR-216-3p   |
| NUDT3 | hsa-miR-6804-5p  |
| NUDT3 | hsa-miR-1787     |
| NUDT3 | hsa-miR-642a-5p  |
| NUDT3 | hsa-miR-216b-3p  |
| NUDT3 | hsa-miR-211-5p   |
| NUDT3 | hsa-miR-3057-3p  |
| NUDT3 | hsa-miR-4498     |
| NUDT3 | hsa-miR-3577-5p  |
| NUDT3 | hsa-miR-4652-3p  |
| NUDT3 | hsa-miR-381-3p   |
| NUDT3 | hsa-miR-4714-5p  |
| NUDT3 | hsa-miR-7844-5p  |

|       |                  |
|-------|------------------|
| NUDT3 | hsa-miR-187-3p   |
| NUDT3 | hsa-miR-33-3p    |
| NUDT3 | hsa-miR-6089     |
| NUDT3 | hsa-miR-3664-5p  |
| NUDT3 | hsa-miR-556-5p   |
| NUDT3 | hsa-miR-363-3p   |
| NUDT3 | hsa-miR-200a-5p  |
| NUDT3 | hsa-miR-7246-5p  |
| NUDT3 | hsa-miR-363-3p   |
| NUDT3 | hsa-miR-3086-3p  |
| NUDT3 | hsa-miR-1273g-3p |
| NUDT3 | hsa-miR-6864-3p  |
| NUDT3 | hsa-miR-548ae-3p |
| NUDT3 | hsa-miR-497-5p   |
| NUDT3 | hsa-miR-2285m    |
| NUDT3 | hsa-miR-6751-3p  |
| NUDT3 | hsa-miR-299-3p   |
| NUDT3 | hsa-miR-6120-5p  |
| NUDT3 | hsa-miR-3617-3p  |
| NUDT3 | hsa-miR-936      |
| NUDT3 | hsa-miR-548d-3p  |
| NUDT3 | hsa-miR-1265     |
| NUDT3 | hsa-miR-5093     |
| NUDT3 | hsa-miR-382-5p   |
| NUDT3 | hsa-miR-342-3p   |
| NUDT3 | hsa-miR-6774-5p  |
| NUDT3 | hsa-miR-202-3p   |
| NUDT3 | hsa-let-7-3p     |
| NUDT3 | hsa-miR-7244-5p  |
| NUDT3 | hsa-miR-4731-3p  |
| NUDT3 | hsa-miR-486-3p   |
| NUDT3 | hsa-miR-1554     |
| NUDT3 | hsa-miR-4758-3p  |
| NUDT3 | hsa-miR-4478     |
| NUDT3 | hsa-miR-7203-5p  |
| NUDT3 | hsa-miR-4689     |
| NUDT3 | hsa-miR-6547-5p  |
| NUDT3 | hsa-miR-698-3p   |
| NUDT3 | hsa-miR-3686     |
| NUDT3 | hsa-miR-5196-3p  |
| NUDT3 | hsa-miR-548j-5p  |
| NUDT3 | hsa-miR-1967     |
| NUDT3 | hsa-miR-4677-3p  |
| NUDT3 | hsa-miR-1574-3p  |
| NUDT3 | hsa-miR-892b     |
| NUDT3 | hsa-miR-548an    |



|       |                  |
|-------|------------------|
| NUDT3 | hsa-miR-3973     |
| NUDT3 | hsa-miR-1681     |
| NUDT3 | hsa-miR-548a-5p  |
| NUDT3 | hsa-miR-8822     |
| NUDT3 | hsa-miR-7852-3p  |
| NUDT3 | hsa-miR-1301-5p  |
| NUDT3 | hsa-miR-7370-5p  |
| NUDT3 | hsa-miR-92a-5p   |
| NUDT3 | hsa-miR-2365     |
| NUDT3 | hsa-miR-2117     |
| NUDT3 | hsa-miR-3682-3p  |
| NUDT3 | hsa-miR-4524a-5p |
| NUDT3 | hsa-miR-7011-5p  |
| NUDT3 | hsa-miR-6084     |
| NUDT3 | hsa-miR-7249-5p  |
| NUDT3 | hsa-miR-7018-5p  |
| NUDT3 | hsa-miR-219a-5p  |
| NUDT3 | hsa-miR-3564     |
| NUDT3 | hsa-miR-548at-5p |
| NUDT3 | hsa-miR-4735-5p  |
| NUDT3 | hsa-miR-3910     |
| NUDT3 | hsa-miR-2110     |
| NUDT3 | hsa-miR-466c-5p  |
| NUDT3 | hsa-miR-6603-3p  |
| NUDT3 | hsa-miR-6834-5p  |
| NUDT3 | hsa-miR-1573     |
| NUDT3 | hsa-miR-3075-3p  |
| NUDT3 | hsa-miR-222-5p   |
| NUDT3 | hsa-miR-1912-5p  |
| NUDT3 | hsa-miR-6989-5p  |
| NUDT3 | hsa-miR-1234-3p  |
| NUDT3 | hsa-miR-765      |
| NUDT3 | hsa-miR-6713-3p  |
| NUDT3 | hsa-miR-5004-3p  |
| NUDT3 | hsa-miR-449a-3p  |
| NUDT3 | hsa-miR-1275     |
| NUDT3 | hsa-miR-3663-5p  |
| NUDT3 | hsa-miR-505-3p   |
| NUDT3 | hsa-miR-4486     |
| NUDT3 | hsa-miR-4659a-3p |
| NUDT3 | hsa-miR-513a     |
| NUDT3 | hsa-miR-1843b-5p |
| NUDT3 | hsa-miR-7161-5p  |
| NUDT3 | hsa-miR-8857     |
| NUDT3 | hsa-miR-1766     |
| NUDT3 | hsa-miR-548a-3p  |

|       |                  |
|-------|------------------|
| NUDT3 | hsa-miR-1271-5p  |
| NUDT3 | hsa-miR-141-3p   |
| NUDT3 | hsa-miR-3158-5p  |
| NUDT3 | hsa-miR-5623-3p  |
| NUDT3 | hsa-miR-1468-3p  |
| NUDT3 | hsa-miR-7033-3p  |
| NUDT3 | hsa-miR-6829-3p  |
| NUDT3 | hsa-miR-584-5p   |
| NUDT3 | hsa-miR-4786-3p  |
| NUDT3 | hsa-miR-8071     |
| NUDT3 | hsa-miR-4281     |
| NUDT3 | hsa-miR-369-3p   |
| NUDT3 | hsa-miR-2384     |
| NUDT3 | hsa-miR-4436b-3p |
| NUDT3 | hsa-miR-6344     |
| NUDT3 | hsa-miR-5113     |
| NUDT3 | hsa-miR-3928-5p  |
| NUDT3 | hsa-miR-196-2-3p |
| NUDT3 | hsa-miR-8884     |
| NUDT3 | hsa-miR-3121-3p  |
| NUDT3 | hsa-miR-6780a-3p |
| NUDT3 | hsa-miR-182-5p   |
| NUDT3 | hsa-miR-3925-3p  |
| NUDT3 | hsa-miR-4722-3p  |
| NUDT3 | hsa-miR-124-5p   |
| NUDT3 | hsa-miR-6881-3p  |
| NUDT3 | hsa-miR-347      |
| NUDT3 | hsa-miR-1190     |
| NUDT3 | hsa-miR-7092-3p  |
| NUDT3 | hsa-miR-5000-3p  |
| NUDT3 | hsa-miR-409a     |
| NUDT3 | hsa-miR-517-5p   |
| NUDT3 | hsa-miR-1288     |
| NUDT3 | hsa-miR-7028-5p  |
| NUDT3 | hsa-miR-7031-3p  |
| NUDT3 | hsa-miR-207      |
| NUDT3 | hsa-miR-450b     |
| NUDT3 | hsa-miR-4736     |
| NUDT3 | hsa-miR-10b-3p   |
| NUDT3 | hsa-miR-1273h-5p |
| NUDT3 | hsa-miR-6558-5p  |
| NUDT3 | hsa-miR-4271     |
| NUDT3 | hsa-miR-323a-5p  |
| NUDT3 | hsa-miR-760      |
| NUDT3 | hsa-miR-7234-5p  |
| NUDT3 | hsa-miR-188-3p   |

|       |                    |
|-------|--------------------|
| NUDT3 | hsa-miR-677        |
| NUDT3 | hsa-miR-1297       |
| NUDT3 | hsa-miR-2432       |
| NUDT3 | hsa-miR-7094b-2-5p |
| NUDT3 | hsa-miR-7033-5p    |
| NUDT3 | hsa-miR-887-5p     |
| NUDT3 | hsa-miR-6323       |
| NUDT3 | hsa-miR-373-3p     |
| NUDT3 | hsa-miR-4326       |
| NUDT3 | hsa-miR-7157-5p    |
| NUDT3 | hsa-miR-2285n      |
| NUDT3 | hsa-miR-1251-3p    |
| NUDT3 | hsa-miR-25-3p      |
| NUDT3 | hsa-miR-1304-5p    |
| NUDT3 | hsa-miR-7262a-5p   |
| NUDT3 | hsa-miR-483-5p     |
| NUDT3 | hsa-miR-7000-3p    |
| NUDT3 | hsa-miR-1969       |
| NUDT3 | hsa-miR-455-3p.2   |
| NUDT3 | hsa-miR-3164       |
| NUDT3 | hsa-miR-126-3p     |
| NUDT3 | hsa-miR-2307       |
| NUDT3 | hsa-miR-466f-3p    |
| NUDT3 | hsa-miR-2328-5p    |
| NUDT3 | hsa-miR-351-3p     |
| NUDT3 | hsa-miR-4802-3p    |
| NUDT3 | hsa-miR-133a-5p    |
| NUDT3 | hsa-miR-4462       |
| NUDT3 | hsa-miR-501-3p     |
| NUDT3 | hsa-miR-4531       |
| NUDT3 | hsa-miR-7334-3p    |
| NUDT3 | hsa-miR-520-5p     |
| NUDT3 | hsa-miR-6816-3p    |
| NUDT3 | hsa-miR-378b       |
| NUDT3 | hsa-miR-93-5p      |
| NUDT3 | hsa-miR-7343-3p    |
| NUDT3 | hsa-miR-326        |
| NUDT3 | hsa-miR-8886       |
| NUDT3 | hsa-miR-657        |
| NUDT3 | hsa-miR-6824-3p    |
| NUDT3 | hsa-miR-1837       |
| NUDT3 | hsa-miR-197-3p     |
| NUDT3 | hsa-miR-146        |
| NUDT3 | hsa-miR-206-3p     |
| NUDT3 | hsa-miR-7306-5p    |
| NUDT3 | hsa-miR-1712-5p    |

|       |                  |
|-------|------------------|
| NUDT3 | hsa-miR-200-3p   |
| NUDT3 | hsa-miR-6760-5p  |
| NUDT3 | hsa-miR-3616-3p  |
| NUDT3 | hsa-miR-6898-3p  |
| NUDT3 | hsa-miR-4433a-3p |
| NUDT3 | hsa-miR-4744     |
| NUDT3 | hsa-miR-6785-5p  |
| NUDT3 | hsa-miR-7266-5p  |
| NUDT3 | hsa-miR-4797-3p  |
| NUDT3 | hsa-miR-223-3p   |
| NUDT3 | hsa-miR-7371d-5p |
| NUDT3 | hsa-miR-513b-3p  |
| NUDT3 | hsa-let-7f-1-3p  |
| NUDT3 | hsa-miR-767      |
| NUDT3 | hsa-miR-5004-5p  |
| NUDT3 | hsa-miR-3614-5p  |
| NUDT3 | hsa-miR-30c-1-3p |
| NUDT3 | hsa-miR-6614-3p  |
| NUDT3 | hsa-miR-6888-3p  |
| NUDT3 | hsa-miR-200a-3p  |
| NUDT3 | hsa-miR-1224-3p  |
| NUDT3 | hsa-miR-644a     |
| NUDT3 | hsa-miR-4301     |
| NUDT3 | hsa-miR-379-5p   |
| NUDT3 | hsa-miR-7365-3p  |
| NUDT3 | hsa-miR-4639-3p  |
| NUDT3 | hsa-miR-3544     |
| NUDT3 | hsa-miR-4695-5p  |
| NUDT3 | hsa-miR-641      |
| NUDT3 | hsa-miR-766-3p   |
| NUDT3 | hsa-miR-500a-5p  |
| NUDT3 | hsa-miR-6079     |
| NUDT3 | hsa-miR-5189-5p  |
| NUDT3 | hsa-miR-2440     |
| NUDT3 | hsa-miR-6545-5p  |
| NUDT3 | hsa-miR-7843-3p  |
| NUDT3 | hsa-miR-548f-5p  |
| NUDT3 | hsa-miR-452-3p   |
| NUDT3 | hsa-miR-890-3p   |
| NUDT3 | hsa-miR-6608-3p  |
| NUDT3 | hsa-miR-8085     |
| NUDT3 | hsa-miR-3561-5p  |
| NUDT3 | hsa-miR-769-5p   |
| NUDT3 | hsa-miR-1643b-5p |
| NUDT3 | hsa-miR-1343-3p  |
| NUDT3 | hsa-miR-2331-5p  |

|       |                  |
|-------|------------------|
| NUDT3 | hsa-miR-7031-5p  |
| NUDT3 | hsa-miR-6513-3p  |
| NUDT3 | hsa-miR-513      |
| NUDT3 | hsa-miR-7274-3p  |
| NUDT3 | hsa-miR-2285af   |
| NUDT3 | hsa-miR-654-3p   |
| NUDT3 | hsa-miR-6750-5p  |
| NUDT3 | hsa-miR-6119-3p  |
| NUDT3 | hsa-miR-320b     |
| NUDT3 | hsa-miR-548w     |
| NUDT3 | hsa-miR-548t-5p  |
| NUDT3 | hsa-miR-4451     |
| NUDT3 | hsa-miR-4640-5p  |
| NUDT3 | hsa-miR-2895     |
| NUDT3 | hsa-miR-8078     |
| NUDT3 | hsa-miR-4421     |
| NUDT3 | hsa-miR-6846-5p  |
| NUDT3 | hsa-miR-199-1-5p |
| NUDT3 | hsa-miR-1915-3p  |
| NUDT3 | hsa-miR-7280-3p  |
| NUDT3 | hsa-miR-211-3p   |
| NUDT3 | hsa-miR-939-5p   |
| NUDT3 | hsa-miR-3085     |
| NUDT3 | hsa-miR-107-5p   |
| NUDT3 | hsa-miR-548i     |
| NUDT3 | hsa-miR-3664-5p  |
| NUDT3 | hsa-miR-4786-5p  |
| NUDT3 | hsa-miR-2332     |
| NUDT3 | hsa-miR-107      |
| NUDT3 | hsa-miR-3611     |
| NUDT3 | hsa-miR-144-3p   |
| NUDT3 | hsa-miR-4700-5p  |
| NUDT3 | hsa-miR-4524-5p  |
| NUDT3 | hsa-miR-3575     |
| NUDT3 | hsa-miR-7111-3p  |
| NUDT3 | hsa-miR-3691-3p  |
| NUDT3 | hsa-miR-4443     |
| NUDT3 | hsa-miR-8806     |
| NUDT3 | hsa-miR-2285r    |
| NUDT3 | hsa-miR-454      |
| NUDT3 | hsa-miR-615-3p   |
| NUDT3 | hsa-miR-7652-3p  |
| NUDT3 | hsa-miR-26-5p    |
| NUDT3 | hsa-miR-676-3p   |
| NUDT3 | hsa-miR-34a-3p   |
| NUDT3 | hsa-miR-3919     |

|       |                  |
|-------|------------------|
| NUDT3 | hsa-miR-6996-3p  |
| NUDT3 | hsa-miR-892-5p   |
| NUDT3 | hsa-miR-3151-5p  |
| NUDT3 | hsa-miR-4728-3p  |
| NUDT3 | hsa-miR-7170-3p  |
| NUDT3 | hsa-miR-7035-5p  |
| NUDT3 | hsa-miR-650d     |
| NUDT3 | hsa-miR-1234-3p  |
| NUDT3 | hsa-miR-6481     |
| NUDT3 | hsa-miR-4424     |
| NUDT3 | hsa-miR-7373d-3p |
| NUDT3 | hsa-miR-3145-3p  |
| NUDT3 | hsa-miR-3110-5p  |
| NUDT3 | hsa-miR-146a-3p  |
| NUDT3 | hsa-miR-1544b-5p |
| NUDT3 | hsa-miR-6913-3p  |
| NUDT3 | hsa-miR-4678     |
| NUDT3 | hsa-miR-6635-5p  |
| NUDT3 | hsa-miR-3542     |
| NUDT3 | hsa-miR-28-3p    |
| NUDT3 | hsa-miR-4661-5p  |
| NUDT3 | hsa-miR-4433b-3p |
| NUDT3 | hsa-miR-1668-3p  |
| NUDT3 | hsa-miR-554      |
| NUDT3 | hsa-miR-7318-5p  |
| NUDT3 | hsa-miR-3059-3p  |
| NUDT3 | hsa-miR-8064     |
| NUDT3 | hsa-miR-4277     |
| NUDT3 | hsa-miR-1896     |
| NUDT3 | hsa-miR-3680-3p  |
| NUDT3 | hsa-miR-6883-3p  |
| NUDT3 | hsa-miR-7007-5p  |
| NUDT3 | hsa-miR-4459     |
| NUDT3 | hsa-miR-154-5p   |
| NUDT3 | hsa-miR-7668-3p  |
| NUDT3 | hsa-miR-1307-3p  |
| NUDT3 | hsa-miR-25-3p    |
| NUDT3 | hsa-miR-193b-3p  |
| NUDT3 | hsa-miR-4699-3p  |
| NUDT3 | hsa-miR-4704-3p  |
| NUDT3 | hsa-miR-2413     |
| NUDT3 | hsa-miR-6868-3p  |
| NUDT3 | hsa-miR-6131     |
| NUDT3 | hsa-miR-101-3p   |
| NUDT3 | hsa-miR-7175-5p  |
| NUDT3 | hsa-miR-136-3p   |

|       |                    |
|-------|--------------------|
| NUDT3 | hsa-miR-133a-3p.1  |
| NUDT3 | hsa-miR-7029-3p    |
| NUDT3 | hsa-miR-10b-5p     |
| NUDT3 | hsa-miR-7382-5p    |
| NUDT3 | hsa-miR-505-5p     |
| NUDT3 | hsa-miR-6722-3p    |
| NUDT3 | hsa-miR-1235       |
| NUDT3 | hsa-miR-2449       |
| NUDT3 | hsa-miR-33-5p      |
| NUDT3 | hsa-miR-294-3p     |
| NUDT3 | hsa-miR-1643a-5p   |
| NUDT3 | hsa-miR-488-3p     |
| NUDT3 | hsa-miR-7309-3p    |
| NUDT3 | hsa-miR-1237-5p    |
| NUDT3 | hsa-miR-7152-5p    |
| NUDT3 | hsa-miR-193b-5p    |
| NUDT3 | hsa-miR-6776-3p    |
| NUDT3 | hsa-miR-106        |
| NUDT3 | hsa-miR-8904b      |
| NUDT3 | hsa-miR-4791       |
| NUDT3 | hsa-miR-301-5p     |
| NUDT3 | hsa-miR-7302-5p    |
| NUDT3 | hsa-miR-7168-5p    |
| NUDT3 | hsa-miR-718        |
| NUDT3 | hsa-miR-195-5p     |
| NUDT3 | hsa-miR-7337-5p    |
| NUDT3 | hsa-miR-1255b-2-3p |
| NUDT3 | hsa-miR-4747-5p    |
| NUDT3 | hsa-miR-154a       |
| NUDT3 | hsa-miR-137        |
| NUDT3 | hsa-miR-922        |
| NUDT3 | hsa-miR-1748       |
| NUDT3 | hsa-miR-2301       |
| NUDT3 | hsa-miR-7025-5p    |
| NUDT3 | hsa-miR-323-3p     |
| NUDT3 | hsa-miR-6760-3p    |
| NUDT3 | hsa-miR-3173-3p    |
| NUDT3 | hsa-miR-487b-5p    |
| NUDT3 | hsa-miR-1272       |
| NUDT3 | hsa-miR-500-5p     |
| NUDT3 | hsa-miR-3649       |
| NUDT3 | hsa-miR-7169-3p    |
| NUDT3 | hsa-miR-30e-3p     |
| NUDT3 | hsa-miR-7008-3p    |
| NUDT3 | hsa-miR-4999-5p    |
| NUDT3 | hsa-miR-7336-5p    |

|       |                   |
|-------|-------------------|
| NUDT3 | hsa-miR-1584-3p   |
| NUDT3 | hsa-miR-1635      |
| NUDT3 | hsa-miR-1207-5p   |
| NUDT3 | hsa-miR-208-3p    |
| NUDT3 | hsa-miR-7328-5p   |
| NUDT3 | hsa-miR-3101-5p   |
| NUDT3 | hsa-miR-2276-3p   |
| NUDT3 | hsa-miR-3074-5p   |
| NUDT3 | hsa-miR-553       |
| NUDT3 | hsa-miR-556-3p    |
| NUDT3 | hsa-miR-421       |
| NUDT3 | hsa-miR-4723-3p   |
| NUDT3 | hsa-miR-6514-3p   |
| NUDT3 | hsa-miR-873-5p.2  |
| NUDT3 | hsa-miR-4717-3p   |
| NUDT3 | hsa-miR-939-5p    |
| NUDT3 | hsa-miR-144-3p    |
| NUDT3 | hsa-miR-7211-3p   |
| NUDT3 | hsa-miR-7013-5p   |
| NUDT3 | hsa-miR-2904      |
| NUDT3 | hsa-miR-599       |
| NUDT3 | hsa-miR-124a-5p   |
| NUDT3 | hsa-miR-504       |
| NUDT3 | hsa-miR-29b-1-5p  |
| NUDT3 | hsa-miR-3105-5p   |
| NUDT3 | hsa-miR-8054      |
| NUDT3 | hsa-miR-3092-3p   |
| NUDT3 | hsa-miR-7290-3p   |
| NUDT3 | hsa-miR-548ay-5p  |
| NUDT3 | hsa-miR-6769b-3p  |
| NUDT3 | hsa-miR-6804-3p   |
| NUDT3 | hsa-miR-6806-3p   |
| NUDT3 | hsa-miR-8113      |
| NUDT3 | hsa-miR-199b-2-5p |
| NUDT3 | hsa-miR-4419b     |
| NUDT3 | hsa-miR-204-5p    |
| NUDT3 | hsa-miR-873-5p    |
| NUDT3 | hsa-miR-9769-5p   |
| NUDT3 | hsa-miR-3942-5p   |
| NUDT3 | hsa-miR-92a-2-5p  |
| NUDT3 | hsa-miR-2469      |
| NUDT3 | hsa-miR-483-3p    |
| NUDT3 | hsa-miR-5700      |
| NUDT3 | hsa-miR-3130-5p   |
| NUDT3 | hsa-miR-6505-3p   |
| NUDT3 | hsa-miR-7047-5p   |



|       |                  |
|-------|------------------|
| NUDT3 | hsa-miR-592      |
| NUDT3 | hsa-miR-212-3p   |
| NUDT3 | hsa-miR-22-3p    |
| NUDT3 | hsa-miR-7297-3p  |
| NUDT3 | hsa-miR-6516     |
| NUDT3 | hsa-miR-4446-5p  |
| NUDT3 | hsa-miR-3938     |
| NUDT3 | hsa-miR-30ad-3p  |
| NUDT3 | hsa-miR-6964-3p  |
| NUDT3 | hsa-miR-7201-3p  |
| NUDT3 | hsa-miR-4753-3p  |
| NUDT3 | hsa-miR-520      |
| NUDT3 | hsa-miR-7663-5p  |
| NUDT3 | hsa-miR-3155a    |
| NUDT3 | hsa-miR-139-5p   |
| NUDT3 | hsa-miR-5586-3p  |
| NUDT3 | hsa-miR-6602-5p  |
| NUDT3 | hsa-miR-1264-3p  |
| NUDT3 | hsa-miR-4653-5p  |
| NUDT3 | hsa-miR-1288-3p  |
| NUDT3 | hsa-miR-5627-5p  |
| NUDT3 | hsa-miR-18       |
| NUDT3 | hsa-miR-302c-5p  |
| NUDT3 | hsa-miR-7172-5p  |
| NUDT3 | hsa-miR-6795-3p  |
| NUDT3 | hsa-miR-7293-5p  |
| NUDT3 | hsa-miR-6789-3p  |
| NUDT3 | hsa-miR-6948-5p  |
| NUDT3 | hsa-miR-1233-5p  |
| NUDT3 | hsa-miR-7398b-3p |
| NUDT3 | hsa-miR-7118-3p  |
| NUDT3 | hsa-miR-466l-3p  |
| NUDT3 | hsa-miR-4260     |
| NUDT3 | hsa-miR-3569-5p  |
| NUDT3 | hsa-miR-1631     |
| NUDT3 | hsa-miR-6721-5p  |
| NUDT3 | hsa-miR-3080-3p  |
| NUDT3 | hsa-miR-1255b-5p |
| NUDT3 | hsa-miR-7184-5p  |
| NUDT3 | hsa-miR-9-5p     |
| NUDT3 | hsa-miR-7296-3p  |
| NUDT3 | hsa-miR-1228-3p  |
| NUDT3 | hsa-miR-550-5p   |
| NUDT3 | hsa-miR-7216-5p  |
| NUDT3 | hsa-miR-330-3p   |
| NUDT3 | hsa-miR-4529-5p  |

|       |                  |
|-------|------------------|
| NUDT3 | hsa-miR-4490     |
| NUDT3 | hsa-miR-3103-5p  |
| NUDT3 | hsa-miR-3182     |
| NUDT3 | hsa-miR-4650-3p  |
| NUDT3 | hsa-miR-4251     |
| NUDT3 | hsa-miR-1572     |
| NUDT3 | hsa-miR-6356     |
| NUDT3 | hsa-miR-3529-3p  |
| NUDT3 | hsa-miR-3130-3p  |
| NUDT3 | hsa-miR-543-3p   |
| NUDT3 | hsa-miR-5685     |
| NUDT3 | hsa-miR-548l     |
| NUDT3 | hsa-miR-8864     |
| NUDT3 | hsa-miR-4782-5p  |
| NUDT3 | hsa-miR-545-3p   |
| NUDT3 | hsa-miR-7395-5p  |
| NUDT3 | hsa-miR-7066-3p  |
| NUDT3 | hsa-miR-411-3p   |
| NUDT3 | hsa-miR-518      |
| NUDT3 | hsa-miR-548ac    |
| NUDT3 | hsa-miR-3134     |
| NUDT3 | hsa-miR-1294     |
| NUDT3 | hsa-miR-548au-5p |
| NUDT3 | hsa-miR-7354-3p  |
| NUDT3 | hsa-miR-6801-5p  |
| NUDT3 | hsa-miR-143-3p   |
| NUDT3 | hsa-miR-1825     |
| NUDT3 | hsa-miR-7374c-3p |
| NUDT3 | hsa-miR-4667     |
| NUDT3 | hsa-miR-202-3p   |
| NUDT3 | hsa-miR-7109-3p  |
| NUDT3 | hsa-miR-4495     |
| NUDT3 | hsa-miR-2288     |
| NUDT3 | hsa-miR-1955-3p  |
| NUDT3 | hsa-miR-5695     |
| NUDT3 | hsa-miR-3151-3p  |
| NUDT3 | hsa-miR-371b-5p  |
| NUDT3 | hsa-miR-30b-3p   |
| NUDT3 | hsa-miR-6786-3p  |
| NUDT3 | hsa-miR-4650     |
| NUDT3 | hsa-miR-1281     |
| NUDT3 | hsa-miR-7260-5p  |
| NUDT3 | hsa-miR-7651-3p  |
| NUDT3 | hsa-miR-186-5p   |
| NUDT3 | hsa-miR-2456     |
| NUDT3 | hsa-miR-1188-3p  |

|       |                    |
|-------|--------------------|
| NUDT3 | hsa-miR-4676-5p    |
| NUDT3 | hsa-miR-5087       |
| NUDT3 | hsa-miR-342-5p     |
| NUDT3 | hsa-miR-7152-3p    |
| NUDT3 | hsa-miR-6894-5p    |
| NUDT3 | hsa-miR-1963       |
| NUDT3 | hsa-miR-8800       |
| NUDT3 | hsa-miR-802        |
| NUDT3 | hsa-miR-3682-5p    |
| NUDT3 | hsa-miR-7192-5p    |
| NUDT3 | hsa-miR-7214-3p    |
| NUDT3 | hsa-miR-7851-3p    |
| NUDT3 | hsa-miR-7386a-3-3p |
| NUDT3 | hsa-miR-1707       |
| NUDT3 | hsa-miR-6325       |
| NUDT3 | hsa-miR-365-5p     |
| NUDT3 | hsa-miR-1292-3p    |
| NUDT3 | hsa-miR-6976-5p    |
| NUDT3 | hsa-miR-370-3p     |
| NUDT3 | hsa-miR-6880-5p    |
| NUDT3 | hsa-miR-1249-3p    |
| NUDT3 | hsa-miR-3127-5p    |
| NUDT3 | hsa-miR-181b-2-3p  |
| NUDT3 | hsa-miR-548u       |
| NUDT3 | hsa-miR-6861-5p    |
| NUDT3 | hsa-miR-540-5p     |
| NUDT3 | hsa-miR-5691       |
| NUDT3 | hsa-miR-500b-3p    |
| NUDT3 | hsa-miR-4686       |
| NUDT3 | hsa-miR-5106       |
| NUDT3 | hsa-miR-6873-5p    |
| NUDT3 | hsa-miR-7679-3p    |
| NUDT3 | hsa-miR-7064-5p    |
| NUDT3 | hsa-miR-30-3p      |
| NUDT3 | hsa-miR-7515       |
| NUDT3 | hsa-miR-8812       |
| NUDT3 | hsa-miR-652-5p     |
| NUDT3 | hsa-miR-2116-3p    |
| NUDT3 | hsa-miR-4300       |
| NUDT3 | hsa-miR-450a       |
| NUDT3 | hsa-miR-605-5p     |
| NUDT3 | hsa-miR-626        |
| NUDT3 | hsa-miR-6660-3p    |
| NUDT3 | hsa-miR-6639-5p    |
| NUDT3 | hsa-miR-1225-3p    |
| NUDT3 | hsa-miR-567        |

|       |                  |
|-------|------------------|
| NUDT3 | hsa-miR-7677-5p  |
| NUDT3 | hsa-miR-26-2-3p  |
| NUDT3 | hsa-miR-4667-3p  |
| NUDT3 | hsa-miR-4726-3p  |
| NUDT3 | hsa-miR-663a     |
| NUDT3 | hsa-miR-142-5p   |
| NUDT3 | hsa-miR-3586-3p  |
| NUDT3 | hsa-miR-2893     |
| NUDT3 | hsa-miR-3620-3p  |
| NUDT3 | hsa-miR-6554-3p  |
| NUDT3 | hsa-miR-298      |
| NUDT3 | hsa-miR-6887-3p  |
| NUDT3 | hsa-miR-8057     |
| NUDT3 | hsa-miR-1470     |
| NUDT3 | hsa-miR-548aef   |
| NUDT3 | hsa-miR-7366-3p  |
| NUDT3 | hsa-miR-518d-5p  |
| NUDT3 | hsa-miR-155-5p   |
| NUDT3 | hsa-miR-6851-5p  |
| NUDT3 | hsa-miR-2285s    |
| NUDT3 | hsa-miR-625-5p   |
| NUDT3 | hsa-miR-6501-5p  |
| NUDT3 | hsa-miR-3587     |
| NUDT3 | hsa-miR-4457     |
| NUDT3 | hsa-miR-1762     |
| NUDT3 | hsa-miR-3064-5p  |
| NUDT3 | hsa-miR-2284ab   |
| NUDT3 | hsa-miR-103-2-5p |
| NUDT3 | hsa-miR-424-5p   |
| NUDT3 | hsa-miR-7355-3p  |
| NUDT3 | hsa-miR-133      |
| NUDT3 | hsa-miR-6919-5p  |
| NUDT3 | hsa-miR-4533     |
| NUDT3 | hsa-miR-4294     |
| NUDT3 | hsa-miR-6742-5p  |
| NUDT3 | hsa-miR-147a     |
| NUDT3 | hsa-miR-7032-5p  |
| NUDT3 | hsa-miR-4672     |
| NUDT3 | hsa-miR-4745-5p  |
| NUDT3 | hsa-miR-466-5p   |
| NUDT3 | hsa-miR-122-5p   |
| NUDT3 | hsa-miR-4302     |
| NUDT3 | hsa-miR-6733-3p  |
| NUDT3 | hsa-miR-8888     |
| NUDT3 | hsa-miR-575      |
| NUDT3 | hsa-miR-4293     |

|       |                   |
|-------|-------------------|
| NUDT3 | hsa-miR-499b-5p   |
| NUDT3 | hsa-miR-450a-2-3p |
| NUDT3 | hsa-miR-7272-5p   |
| NUDT3 | hsa-miR-5589-3p   |
| NUDT3 | hsa-miR-3956      |
| NUDT3 | hsa-miR-6739-3p   |
| NUDT3 | hsa-miR-7371a-5p  |
| NUDT3 | hsa-miR-6911-5p   |
| NUDT3 | hsa-miR-1541      |
| NUDT3 | hsa-miR-6981-5p   |
| NUDT3 | hsa-miR-1301      |
| NUDT3 | hsa-miR-664       |
| NUDT3 | hsa-miR-5572      |
| NUDT3 | hsa-miR-7372-5p   |
| NUDT3 | hsa-miR-7173-5p   |
| NUDT3 | hsa-miR-1245-3p   |
| NUDT3 | hsa-miR-602       |
| NUDT3 | hsa-miR-3151      |
| NUDT3 | hsa-miR-940       |
| NUDT3 | hsa-miR-2483-5p   |
| NUDT3 | hsa-miR-6779-3p   |
| NUDT3 | hsa-miR-7398n-3p  |
| NUDT3 | hsa-miR-2917      |
| NUDT3 | hsa-miR-674-3p    |
| NUDT3 | hsa-miR-3606-3p   |
| NUDT3 | hsa-miR-665-3p    |
| NUDT3 | hsa-miR-7006-3p   |
| NUDT3 | hsa-miR-1943-3p   |
| NUDT3 | hsa-miR-409-3p    |
| NUDT3 | hsa-miR-6775-3p   |
| NUDT3 | hsa-miR-769-3p    |
| NUDT3 | hsa-miR-1745      |
| NUDT3 | hsa-miR-125       |
| NUDT3 | hsa-miR-296-5p    |
| NUDT3 | hsa-miR-4254      |
| NUDT3 | hsa-miR-122-3p    |
| NUDT3 | hsa-miR-4795-3p   |
| NUDT3 | hsa-miR-6883-5p   |
| NUDT3 | hsa-miR-423-5p    |
| NUDT3 | hsa-miR-4316      |
| NUDT3 | hsa-miR-7278-3p   |
| NUDT3 | hsa-miR-622       |
| NUDT3 | hsa-miR-3977      |
| NUDT3 | hsa-miR-663a      |
| NUDT3 | hsa-miR-544-3p    |
| NUDT3 | hsa-miR-6748-3p   |

|       |                  |
|-------|------------------|
| NUDT3 | hsa-miR-1747-3p  |
| NUDT3 | hsa-miR-7439-3p  |
| NUDT3 | hsa-miR-875-5p   |
| NUDT3 | hsa-miR-1715-5p  |
| NUDT3 | hsa-miR-2326     |
| NUDT3 | hsa-miR-590-5p   |
| NUDT3 | hsa-miR-512-3p   |
| NUDT3 | hsa-miR-4794     |
| NUDT3 | hsa-miR-1778     |
| NUDT3 | hsa-miR-98-5p    |
| NUDT3 | hsa-miR-5100     |
| NUDT3 | hsa-miR-510-5p   |
| NUDT3 | hsa-miR-6520     |
| NUDT3 | hsa-miR-7208-3p  |
| NUDT3 | hsa-miR-1252-5p  |
| NUDT3 | hsa-miR-2465     |
| NUDT3 | hsa-miR-548z     |
| NUDT3 | hsa-miR-1180-5p  |
| NUDT3 | hsa-miR-7369-5p  |
| NUDT3 | hsa-miR-548g-5p  |
| NUDT3 | hsa-miR-590-3p   |
| NUDT3 | hsa-miR-7206-3p  |
| NUDT3 | hsa-miR-6809-5p  |
| NUDT3 | hsa-miR-548ap-3p |
| NUDT3 | hsa-miR-6738-3p  |
| NUDT3 | hsa-miR-3689e    |
| NUDT3 | hsa-miR-23-3p    |
| NUDT3 | hsa-miR-6990-5p  |
| NUDT3 | hsa-miR-7680-3p  |
| NUDT3 | hsa-miR-216-5p   |
| NUDT3 | hsa-miR-634      |
| NUDT3 | hsa-miR-3431     |
| NUDT3 | hsa-miR-8082     |
| NUDT3 | hsa-miR-6511a-5p |
| NUDT3 | hsa-miR-2358     |
| NUDT3 | hsa-miR-3972     |
| NUDT3 | hsa-miR-4657     |
| NUDT3 | hsa-miR-6746-5p  |
| NUDT3 | hsa-miR-7385e-3p |
| NUDT3 | hsa-miR-297      |
| NUDT3 | hsa-miR-4685-5p  |
| NUDT3 | hsa-miR-6855-5p  |
| NUDT3 | hsa-miR-7070-5p  |
| NUDT3 | hsa-miR-8840     |
| NUDT3 | hsa-miR-99-3p    |
| NUDT3 | hsa-miR-4521     |

|       |                  |
|-------|------------------|
| NUDT3 | hsa-miR-6867-5p  |
| NUDT3 | hsa-miR-4801     |
| NUDT3 | hsa-miR-7200-3p  |
| NUDT3 | hsa-miR-8801     |
| NUDT3 | hsa-miR-23c      |
| NUDT3 | hsa-miR-4266     |
| NUDT3 | hsa-miR-6903-5p  |
| NUDT3 | hsa-let-7a-3p    |
| NUDT3 | hsa-miR-548bb-3p |
| NUDT3 | hsa-miR-7396-3p  |
| NUDT3 | hsa-miR-216a-5p  |
| NUDT3 | hsa-miR-4796-5p  |
| NUDT3 | hsa-miR-588      |
| NUDT3 | hsa-miR-1270     |
| NUDT3 | hsa-miR-7654-3p  |
| NUDT3 | hsa-miR-504-3p   |
| NUDT3 | hsa-miR-7009-3p  |
| NUDT3 | hsa-miR-3156-3p  |
| NUDT3 | hsa-miR-2429     |
| NUDT3 | hsa-miR-4755-5p  |
| NUDT3 | hsa-miR-671-5p   |
| NUDT3 | hsa-miR-885      |
| NUDT3 | hsa-miR-514-3p   |
| NUDT3 | hsa-miR-631      |
| NUDT3 | hsa-miR-5195-5p  |
| NUDT3 | hsa-let-7a-2-3p  |
| NUDT3 | hsa-miR-6757-5p  |
| NUDT3 | hsa-miR-1293     |
| NUDT3 | hsa-miR-141-3p   |
| NUDT3 | hsa-miR-132-3p   |
| NUDT3 | hsa-miR-34b-5p   |
| NUDT3 | hsa-miR-6550-3p  |
| NUDT3 | hsa-miR-133-3p   |
| NUDT3 | hsa-miR-6544-5p  |
| NUDT3 | hsa-miR-135      |
| NUDT3 | hsa-miR-673-5p   |
| NUDT3 | hsa-miR-6822-5p  |
| NUDT3 | hsa-miR-1283     |
| NUDT3 | hsa-miR-4652-5p  |
| NUDT3 | hsa-miR-1197-3p  |
| NUDT3 | hsa-miR-2284j    |
| NUDT3 | hsa-miR-6734-3p  |
| NUDT3 | hsa-miR-7973     |
| NUDT3 | hsa-miR-636      |
| NUDT3 | hsa-miR-500a-3p  |
| NUDT3 | hsa-miR-7081-5p  |

|       |                  |
|-------|------------------|
| NUDT3 | hsa-miR-7025-3p  |
| NUDT3 | hsa-miR-3600     |
| NUDT3 | hsa-miR-518g-3p  |
| NUDT3 | hsa-miR-669j     |
| NUDT3 | hsa-miR-6792-3p  |
| NUDT3 | hsa-miR-4778-3p  |
| NUDT3 | hsa-miR-708-3p   |
| NUDT3 | hsa-miR-7368-5p  |
| NUDT3 | hsa-miR-27b-5p   |
| NUDT3 | hsa-miR-4447     |
| NUDT3 | hsa-miR-6777-3p  |
| NUDT3 | hsa-miR-2285u    |
| NUDT3 | hsa-miR-6776-5p  |
| NUDT3 | hsa-miR-3619-3p  |
| NUDT3 | hsa-miR-5681b    |
| NUDT3 | hsa-miR-140-3p.2 |
| NUDT3 | hsa-miR-1178-3p  |
| NUDT3 | hsa-miR-7082-3p  |
| NUDT3 | hsa-miR-1253     |
| NUDT3 | hsa-miR-6998-3p  |
| NUDT3 | hsa-miR-1914-5p  |
| NUDT3 | hsa-miR-1841     |
| NUDT3 | hsa-miR-8793     |
| NUDT3 | hsa-miR-5581-5p  |
| NUDT3 | hsa-miR-6762-5p  |
| NUDT3 | hsa-miR-6882-3p  |
| NUDT3 | hsa-miR-30a-3p   |
| NUDT3 | hsa-miR-6869-5p  |
| NUDT3 | hsa-miR-516b     |
| NUDT3 | hsa-miR-743b-5p  |
| NUDT3 | hsa-miR-6680-3p  |
| NUDT3 | hsa-miR-6586-5p  |
| NUDT3 | hsa-miR-883ab-3p |
| NUDT3 | hsa-miR-520g-3p  |
| NUDT3 | hsa-miR-621      |
| NUDT3 | hsa-miR-4257     |
| NUDT3 | hsa-miR-2342     |
| NUDT3 | hsa-miR-2284d    |
| NUDT3 | hsa-miR-6716-5p  |
| NUDT3 | hsa-miR-466mo-3p |
| NUDT3 | hsa-miR-7075-5p  |
| NUDT3 | hsa-miR-548c-3p  |
| NUDT3 | hsa-miR-7398-3p  |
| NUDT3 | hsa-miR-4795-5p  |
| NUDT3 | hsa-miR-4273     |
| NUDT3 | hsa-miR-6864-5p  |



|       |                  |
|-------|------------------|
| NUDT3 | hsa-miR-8843     |
| NUDT3 | hsa-miR-1911-3p  |
| NUDT3 | hsa-miR-8087     |
| NUDT3 | hsa-miR-3091-3p  |
| NUDT3 | hsa-miR-7004-3p  |
| NUDT3 | hsa-miR-7221-3p  |
| NUDT3 | hsa-miR-4314     |
| NUDT3 | hsa-miR-541-3p   |
| NUDT3 | hsa-miR-3121-3p  |
| NUDT3 | hsa-miR-1910-3p  |
| NUDT3 | hsa-miR-510-3p   |
| NUDT3 | hsa-miR-3551-5p  |
| NUDT3 | hsa-miR-7222-5p  |
| NUDT3 | hsa-miR-3653-3p  |
| NUDT3 | hsa-miR-944      |
| NUDT3 | hsa-miR-7062-5p  |
| NUDT3 | hsa-miR-3167-3p  |
| NUDT3 | hsa-miR-608      |
| NUDT3 | hsa-miR-7263-3p  |
| NUDT3 | hsa-miR-2421     |
| NUDT3 | hsa-miR-1247-3p  |
| NUDT3 | hsa-miR-1904     |
| NUDT3 | hsa-miR-2285ad   |
| NUDT3 | hsa-miR-4481     |
| NUDT3 | hsa-miR-7312-3p  |
| NUDT3 | hsa-miR-665      |
| NUDT3 | hsa-miR-1233-3p  |
| NUDT3 | hsa-miR-7041-5p  |
| NUDT3 | hsa-miR-197-5p   |
| NUDT3 | hsa-miR-891a-3p  |
| NUDT3 | hsa-miR-7386i-3p |
| NUDT3 | hsa-miR-6652-5p  |
| NUDT3 | hsa-miR-1540-5p  |
| NUDT3 | hsa-miR-7a-1-3p  |
| NUDT3 | hsa-miR-6501-3p  |
| NUDT3 | hsa-miR-7325-5p  |
| NUDT3 | hsa-miR-3976     |
| NUDT3 | hsa-miR-3088-5p  |
| NUDT3 | hsa-miR-3106-3p  |
| NUDT3 | hsa-miR-197-3p   |
| NUDT3 | hsa-miR-551b-5p  |
| NUDT3 | hsa-miR-570-3p   |
| NUDT3 | hsa-miR-660-5p   |
| NUDT3 | hsa-miR-196-3p   |
| NUDT3 | hsa-miR-3920     |
| NUDT3 | hsa-miR-6629-5p  |

|       |                 |
|-------|-----------------|
| NUDT3 | hsa-miR-4469    |
| NUDT3 | hsa-miR-6126    |
| NUDT3 | hsa-miR-674-5p  |
| NUDT3 | hsa-miR-221-3p  |
| NUDT3 | hsa-miR-6081    |
| NUDT3 | hsa-miR-6087    |
| NUDT3 | hsa-miR-8871    |
| NUDT3 | hsa-miR-1903    |
| NUDT3 | hsa-miR-555     |
| NUDT3 | hsa-miR-190a-3p |
| NUDT3 | hsa-miR-2306    |
| NUDT3 | hsa-miR-4468    |
| NUDT3 | hsa-miR-514a-3p |
| NUDT3 | hsa-miR-210-5p  |
| NUDT3 | hsa-miR-3923    |
| NUDT3 | hsa-miR-557     |
| NUDT3 | hsa-miR-6510-5p |
| NUDT3 | hsa-miR-3135b   |
| NUDT3 | hsa-miR-4759    |
| NUDT3 | hsa-miR-6770-5p |
| NUDT3 | hsa-miR-2461-3p |
| NUDT3 | hsa-miR-942     |
| NUDT3 | hsa-miR-1224    |
| NUDT3 | hsa-miR-6615-3p |
| NUDT3 | hsa-miR-7241-5p |
| NUDT3 | hsa-miR-892a    |
| NUDT3 | hsa-miR-7705    |
| NUDT3 | hsa-miR-4264    |
| NUDT3 | hsa-miR-409-5p  |
| NUDT3 | hsa-miR-485-5p  |
| NUDT3 | hsa-miR-7681-3p |
| NUDT3 | hsa-miR-9-3-3p  |
| NUDT3 | hsa-miR-2284b   |
| NUDT3 | hsa-miR-376b-5p |
| NUDT3 | hsa-miR-6334    |
| NUDT3 | hsa-miR-5618-5p |
| NUDT3 | hsa-miR-6788-5p |
| NUDT3 | hsa-miR-607     |
| NUDT3 | hsa-miR-7665-5p |
| NUDT3 | hsa-miR-6802-5p |
| NUDT3 | hsa-miR-6071    |
| NUDT3 | hsa-miR-18-3p   |
| NUDT3 | hsa-miR-1946a   |
| NUDT3 | hsa-miR-872     |
| NUDT3 | hsa-miR-1622    |
| NUDT3 | hsa-miR-3058-3p |

|       |                  |
|-------|------------------|
| NUDT3 | hsa-miR-7176-3p  |
| NUDT3 | hsa-miR-1912     |
| NUDT3 | hsa-miR-7374-5p  |
| NUDT3 | hsa-miR-6791-3p  |
| NUDT3 | hsa-miR-7236-5p  |
| NUDT3 | hsa-miR-1238-5p  |
| NUDT3 | hsa-miR-136-5p   |
| NUDT3 | hsa-miR-6997-5p  |
| NUDT3 | hsa-miR-760-3p   |
| NUDT3 | hsa-miR-7386j-5p |
| NUDT3 | hsa-miR-499a-3p  |
| NUDT3 | hsa-miR-7392-3p  |
| NUDT3 | hsa-miR-7468-5p  |
| NUDT3 | hsa-miR-466n-3p  |
| NUDT3 | hsa-miR-3692-5p  |
| NUDT3 | hsa-miR-510      |
| NUDT3 | hsa-miR-3193     |
| NUDT3 | hsa-miR-8803     |
| NUDT3 | hsa-miR-6499-3p  |
| NUDT3 | hsa-miR-761      |
| NUDT3 | hsa-miR-3065-5p  |
| NUDT3 | hsa-miR-4324     |
| NUDT3 | hsa-miR-3667-3p  |
| NUDT3 | hsa-miR-6998-5p  |
| NUDT3 | hsa-miR-6829-5p  |
| NUDT3 | hsa-miR-6408     |
| NUDT3 | hsa-miR-2424     |
| NUDT3 | hsa-miR-548      |
| NUDT3 | hsa-miR-4263     |
| NUDT3 | hsa-miR-3140-5p  |
| NUDT3 | hsa-miR-350-3p   |
| NUDT3 | hsa-miR-1805-5p  |
| NUDT3 | hsa-miR-449-5p   |
| NUDT3 | hsa-miR-1968-3p  |
| NUDT3 | hsa-miR-2053     |
| NUDT3 | hsa-miR-1226-3p  |
| NUDT3 | hsa-miR-3612     |
| NUDT3 | hsa-miR-7244-3p  |
| NUDT3 | hsa-miR-7047-3p  |
| NUDT3 | hsa-miR-7977     |
| NUDT3 | hsa-miR-1546-5p  |
| NUDT3 | hsa-miR-5680     |
| NUDT3 | hsa-miR-513c-5p  |
| NUDT3 | hsa-miR-877-3p   |
| NUDT3 | hsa-miR-548ah-5p |
| NUDT3 | hsa-miR-421-3p   |

|       |                   |
|-------|-------------------|
| NUDT3 | hsa-miR-625-5p    |
| NUDT3 | hsa-miR-2450a     |
| NUDT3 | hsa-miR-1249-5p   |
| NUDT3 | hsa-miR-2382-5p   |
| NUDT3 | hsa-miR-16-5p     |
| NUDT3 | hsa-miR-6420      |
| NUDT3 | hsa-miR-2885      |
| NUDT3 | hsa-miR-574-3p    |
| NUDT3 | hsa-miR-3135a     |
| NUDT3 | hsa-miR-606       |
| NUDT3 | hsa-miR-4732-3p   |
| NUDT3 | hsa-miR-3128      |
| NUDT3 | hsa-miR-6918-5p   |
| NUDT3 | hsa-miR-206-5p    |
| NUDT3 | hsa-miR-322-5p    |
| NUDT3 | hsa-miR-5588-3p   |
| NUDT3 | hsa-miR-624-5p    |
| NUDT3 | hsa-miR-3928-3p   |
| NUDT3 | hsa-miR-2394      |
| NUDT3 | hsa-miR-4519      |
| NUDT3 | hsa-miR-7249-3p   |
| NUDT3 | hsa-miR-495-3p    |
| NUDT3 | hsa-miR-2888      |
| NUDT3 | hsa-miR-532-5p    |
| NUDT3 | hsa-miR-3922-5p   |
| NUDT3 | hsa-miR-669c-3p   |
| NUDT3 | hsa-miR-582-5p    |
| NUDT3 | hsa-miR-7378-3p   |
| NUDT3 | hsa-miR-3152-5p   |
| NUDT3 | hsa-miR-6892-3p   |
| NUDT3 | hsa-miR-4749-3p   |
| NUDT3 | hsa-miR-2284-5p   |
| NUDT3 | hsa-miR-140-5p    |
| NUDT3 | hsa-miR-6796-5p   |
| NUDT3 | hsa-miR-7071-5p   |
| NUDT3 | hsa-miR-2368-5p   |
| NUDT3 | hsa-miR-4761-5p   |
| NUDT3 | hsa-miR-7385c-3p  |
| NUDT3 | hsa-miR-8100      |
| NUDT3 | hsa-miR-2286      |
| NUDT3 | hsa-miR-544a      |
| NUDT3 | hsa-miR-548m      |
| NUDT3 | hsa-miR-6693-3p   |
| NUDT3 | hsa-miR-3074-2-3p |
| NUDT3 | hsa-miR-335-5p    |
| NUDT3 | hsa-miR-204-5p    |

|       |                  |
|-------|------------------|
| NUDT3 | hsa-miR-548ak    |
| NUDT3 | hsa-miR-20a-3p   |
| NUDT3 | hsa-miR-6927-3p  |
| NUDT3 | hsa-miR-506-3p   |
| NUDT3 | hsa-miR-2381     |
| NUDT3 | hsa-miR-1388-5p  |
| NUDT3 | hsa-miR-6975-5p  |
| NUDT3 | hsa-miR-2116-5p  |
| NUDT3 | hsa-miR-8108     |
| NUDT3 | hsa-miR-7685-3p  |
| NUDT3 | hsa-miR-8110     |
| NUDT3 | hsa-miR-2316     |
| NUDT3 | hsa-miR-383      |
| NUDT3 | hsa-let-7g-3p    |
| NUDT3 | hsa-miR-3670     |
| NUDT3 | hsa-miR-7039-5p  |
| NUDT3 | hsa-miR-7398n-5p |
| NUDT3 | hsa-miR-2303     |
| NUDT3 | hsa-miR-6778-3p  |
| NUDT3 | hsa-miR-4291     |
| NUDT3 | hsa-miR-182-5p   |
| NUDT3 | hsa-miR-548i-3p  |
| NUDT3 | hsa-miR-5696     |
| NUDT3 | hsa-miR-151a-5p  |
| NUDT3 | hsa-miR-6949-3p  |
| NUDT3 | hsa-miR-3058-5p  |
| NUDT3 | hsa-miR-7168-3p  |
| NUDT3 | hsa-miR-361-5p   |
| NUDT3 | hsa-miR-3934-3p  |
| NUDT3 | hsa-miR-140-5p   |
| NUDT3 | hsa-miR-2370-3p  |
| NUDT3 | hsa-miR-3116     |
| NUDT3 | hsa-miR-2334     |
| NUDT3 | hsa-miR-8887     |
| NUDT3 | hsa-miR-3169     |
| NUDT3 | hsa-miR-8851     |
| NUDT3 | hsa-miR-4750-3p  |
| NUDT3 | hsa-miR-2278     |
| NUDT3 | hsa-miR-645      |
| NUDT3 | hsa-miR-96-3p    |
| NUDT3 | hsa-miR-519e-3p  |
| NUDT3 | hsa-miR-208a-3p  |
| NUDT3 | hsa-miR-323a-3p  |
| NUDT3 | hsa-miR-1236-3p  |
| NUDT3 | hsa-miR-7037-5p  |
| NUDT3 | hsa-miR-1468-5p  |

|       |                  |
|-------|------------------|
| NUDT3 | hsa-miR-496      |
| NUDT3 | hsa-miR-6764-5p  |
| NUDT3 | hsa-miR-3967     |
| NUDT3 | hsa-miR-3095-3p  |
| NUDT3 | hsa-miR-3138     |
| NUDT3 | hsa-miR-3915     |
| NUDT3 | hsa-miR-1808     |
| NUDT3 | hsa-miR-3184-3p  |
| NUDT3 | hsa-miR-514a-3p  |
| NUDT3 | hsa-miR-6715a-3p |
| NUDT3 | hsa-miR-4768-3p  |
| NUDT3 | hsa-miR-18a-3p   |
| NUDT3 | hsa-miR-7375-3p  |
| NUDT3 | hsa-miR-2392     |
| NUDT3 | hsa-miR-128      |
| NUDT3 | hsa-miR-6814-5p  |
| NUDT3 | hsa-miR-6727-3p  |
| NUDT3 | hsa-miR-5589-5p  |
| NUDT3 | hsa-miR-6888-5p  |
| NUDT3 | hsa-miR-4423-3p  |
| NUDT3 | hsa-miR-298-5p   |
| NUDT3 | hsa-miR-6931-5p  |
| NUDT3 | hsa-miR-3688-3p  |
| NUDT3 | hsa-miR-4776-5p  |
| NUDT3 | hsa-miR-8824     |
| NUDT3 | hsa-miR-4659b-5p |
| NUDT3 | hsa-miR-2356     |
| NUDT3 | hsa-miR-1684-5p  |
| NUDT3 | hsa-miR-1266-3p  |
| NUDT3 | hsa-miR-7252-3p  |
| NUDT3 | hsa-miR-6955-5p  |
| NUDT3 | hsa-miR-4682     |
| NUDT3 | hsa-miR-6735-5p  |
| NUDT3 | hsa-miR-204-3p   |
| NUDT3 | hsa-miR-6724-5p  |
| NUDT3 | hsa-miR-7661-5p  |
| NUDT3 | hsa-miR-8826     |
| NUDT3 | hsa-miR-7110-5p  |
| NUDT3 | hsa-miR-2489     |
| NUDT3 | hsa-miR-2324     |
| NUDT3 | hsa-miR-2417     |
| NUDT3 | hsa-miR-6973a-3p |
| NUDT3 | hsa-miR-653-3p   |
| NUDT3 | hsa-miR-1273f    |
| NUDT3 | hsa-miR-7356-5p  |
| NUDT3 | hsa-miR-619-3p   |

|       |                  |
|-------|------------------|
| NUDT3 | hsa-miR-32-5p    |
| NUDT3 | hsa-miR-1608     |
| NUDT3 | hsa-miR-7478-5p  |
| NUDT3 | hsa-miR-374c-5p  |
| NUDT3 | hsa-miR-96-5p    |
| NUDT3 | hsa-miR-6923-3p  |
| NUDT3 | hsa-miR-8797     |
| NUDT3 | hsa-miR-6625-5p  |
| NUDT3 | hsa-miR-8846     |
| NUDT3 | hsa-miR-6769a-5p |
| NUDT3 | hsa-miR-6549-3p  |
| NUDT3 | hsa-miR-7220-3p  |
| NUDT3 | hsa-miR-375-3p   |
| NUDT3 | hsa-miR-290b-3p  |
| NUDT3 | hsa-miR-8836     |
| NUDT3 | hsa-miR-6819-5p  |
| NUDT3 | hsa-miR-372      |
| NUDT3 | hsa-miR-154c     |
| NUDT3 | hsa-miR-138-3p   |
| NUDT3 | hsa-miR-451-3p   |
| NUDT3 | hsa-miR-6533     |
| NUDT3 | hsa-miR-551b-3p  |
| NUDT3 | hsa-miR-494-3p   |
| NUDT3 | hsa-miR-1200     |
| NUDT3 | hsa-miR-5787     |
| NUDT3 | hsa-miR-125-5p   |
| NUDT3 | hsa-miR-7440-5p  |
| NUDT3 | hsa-miR-449a     |
| NUDT3 | hsa-miR-648      |
| NUDT3 | hsa-miR-4485-5p  |
| NUDT3 | hsa-miR-328      |
| NUDT3 | hsa-miR-1323-5p  |
| NUDT3 | hsa-miR-3934-5p  |
| NUDT3 | hsa-miR-3202     |
| NUDT3 | hsa-miR-1956-5p  |
| NUDT3 | hsa-miR-7162-5p  |
| NUDT3 | hsa-miR-6500-3p  |
| NUDT3 | hsa-miR-4255     |
| NUDT3 | hsa-miR-383-5p   |
| NUDT3 | hsa-miR-6621-5p  |
| NUDT3 | hsa-miR-7863     |
| NUDT3 | hsa-miR-7861     |
| NUDT3 | hsa-miR-324      |
| NUDT3 | hsa-miR-6988-3p  |
| NUDT3 | hsa-miR-7155-5p  |
| NUDT3 | hsa-miR-3129-3p  |

|       |                  |
|-------|------------------|
| NUDT3 | hsa-miR-3688-5p  |
| NUDT3 | hsa-miR-2339     |
| NUDT3 | hsa-miR-7057-5p  |
| NUDT3 | hsa-miR-6815-3p  |
| NUDT3 | hsa-miR-130b-5p  |
| NUDT3 | hsa-miR-3093-3p  |
| NUDT3 | hsa-miR-548h-5p  |
| NUDT3 | hsa-miR-6870-3p  |
| NUDT3 | hsa-miR-330-3p   |
| NUDT3 | hsa-miR-4799-3p  |
| NUDT3 | hsa-miR-4290     |
| NUDT3 | hsa-miR-515      |
| NUDT3 | hsa-miR-2453     |
| NUDT3 | hsa-miR-6852-5p  |
| NUDT3 | hsa-miR-7107-5p  |
| NUDT3 | hsa-miR-2416     |
| NUDT3 | hsa-miR-4680-5p  |
| NUDT3 | hsa-miR-552      |
| NUDT3 | hsa-miR-409b     |
| NUDT3 | hsa-miR-8804     |
| NUDT3 | hsa-miR-367-3p   |
| NUDT3 | hsa-miR-516b-5p  |
| NUDT3 | hsa-miR-4420     |
| NUDT3 | hsa-miR-7253-5p  |
| NUDT3 | hsa-miR-7063-5p  |
| NUDT3 | hsa-miR-520-3p   |
| NUDT3 | hsa-miR-8850     |
| NUDT3 | hsa-miR-6754-5p  |
| NUDT3 | hsa-miR-433-5p   |
| NUDT3 | hsa-miR-6769b-5p |
| NUDT3 | hsa-miR-370      |
| NUDT3 | hsa-miR-548az-3p |
| NUDT3 | hsa-miR-4675     |
| NUDT3 | hsa-miR-466g     |
| NUDT3 | hsa-miR-8855     |
| NUDT3 | hsa-miR-2387     |
| NUDT3 | hsa-miR-6551-3p  |
| NUDT3 | hsa-miR-191-3p   |
| NUDT3 | hsa-miR-642b-5p  |
| NUDT3 | hsa-miR-881-3p   |
| NUDT3 | hsa-miR-2452     |
| NUDT3 | hsa-miR-6129     |
| NUDT3 | hsa-miR-5622-3p  |
| NUDT3 | hsa-miR-8893     |
| NUDT3 | hsa-miR-7242-5p  |
| NUDT3 | hsa-miR-4651     |



|       |                  |
|-------|------------------|
| NUDT3 | hsa-miR-183-5p.1 |
| NUDT3 | hsa-miR-7336-3p  |
| NUDT3 | hsa-miR-1343     |
| NUDT3 | hsa-miR-3176     |
| NUDT3 | hsa-miR-2285l    |
| NUDT3 | hsa-miR-2426     |
| NUDT3 | hsa-miR-7048-3p  |
| NUDT3 | hsa-miR-552-3p   |
| NUDT3 | hsa-miR-548b-3p  |
| NUDT3 | hsa-miR-615-5p   |
| NUDT3 | hsa-miR-6716-3p  |
| NUDT3 | hsa-miR-218-5p   |
| NUDT3 | hsa-miR-548f-3p  |
| NUDT3 | hsa-miR-4754     |
| NUDT3 | hsa-miR-4638-5p  |
| NUDT3 | hsa-miR-137-5p   |
| NUDT3 | hsa-miR-2447     |
| NUDT3 | hsa-miR-7154-3p  |
| NUDT3 | hsa-miR-2438     |
| NUDT3 | hsa-miR-7034-3p  |
| NUDT3 | hsa-miR-6765-3p  |
| NUDT3 | hsa-miR-1685-3p  |
| NUDT3 | hsa-miR-1947-5p  |
| NUDT3 | hsa-miR-650abc   |
| NUDT3 | hsa-miR-4646-3p  |
| NUDT3 | hsa-miR-7466-5p  |
| NUDT3 | hsa-miR-208-5p   |
| NUDT3 | hsa-miR-2379     |
| NUDT3 | hsa-miR-124-3p.1 |
| NUDT3 | hsa-miR-611      |
| NUDT3 | hsa-miR-5186     |
| NUDT3 | hsa-miR-1590     |
| NUDT3 | hsa-miR-8081     |
| NUDT3 | hsa-miR-6123     |
| NUDT3 | hsa-miR-6631-5p  |
| NUDT3 | hsa-miR-23b-3p   |
| NUDT3 | hsa-miR-619-5p   |
| NUDT3 | hsa-miR-1542-5p  |
| NUDT3 | hsa-miR-1619     |
| NUDT3 | hsa-miR-6840-3p  |
| NUDT3 | hsa-miR-509-3-5p |
| NUDT3 | hsa-miR-885-5p   |
| NUDT3 | hsa-miR-2298     |
| NUDT3 | hsa-miR-7161-3p  |
| NUDT3 | hsa-miR-6827-5p  |
| NUDT3 | hsa-miR-651      |

|       |                   |
|-------|-------------------|
| NUDT3 | hsa-miR-5114      |
| NUDT3 | hsa-miR-9500      |
| NUDT3 | hsa-miR-380       |
| NUDT3 | hsa-miR-466aep-5p |
| NUDT3 | hsa-miR-15b-3p    |
| NUDT3 | hsa-miR-365a-5p   |
| NUDT3 | hsa-miR-759       |
| NUDT3 | hsa-miR-2284u     |
| NUDT3 | hsa-miR-1545a-3p  |
| NUDT3 | hsa-miR-3927-3p   |
| NUDT3 | hsa-miR-6165      |
| NUDT3 | hsa-miR-6759-3p   |
| NUDT3 | hsa-miR-183-5p.2  |
| NUDT3 | hsa-miR-8080      |
| NUDT3 | hsa-miR-7648-3p   |
| NUDT3 | hsa-miR-3179      |
| NUDT3 | hsa-miR-215       |
| NUDT3 | hsa-miR-3667-5p   |
| NUDT3 | hsa-miR-143-3p    |
| NUDT3 | hsa-miR-2441      |
| NUDT3 | hsa-miR-3060-5p   |
| NUDT3 | hsa-miR-216b      |
| NUDT3 | hsa-miR-1304-3p   |
| NUDT3 | hsa-miR-7383-3p   |
| NUDT3 | hsa-miR-2284aa    |
| NUDT3 | hsa-miR-7150      |
| NUDT3 | hsa-miR-7051-3p   |
| NUDT3 | hsa-miR-2305      |
| NUDT3 | hsa-miR-185-5p    |
| NUDT3 | hsa-miR-4520-2-3p |
| NUDT3 | hsa-miR-494       |
| NUDT3 | hsa-miR-7165-5p   |
| NUDT3 | hsa-miR-5625-3p   |
| NUDT3 | hsa-miR-7286-5p   |
| NUDT3 | hsa-miR-7088-5p   |
| NUDT3 | hsa-miR-1239      |
| NUDT3 | hsa-miR-3613-3p   |
| NUDT3 | hsa-miR-4738-3p   |
| NUDT3 | hsa-miR-4515      |
| NUDT3 | hsa-miR-6579-3p   |
| NUDT3 | hsa-miR-7208-5p   |
| NUDT3 | hsa-miR-320-5p    |
| NUDT3 | hsa-miR-2355-3p   |
| NUDT3 | hsa-miR-7680-5p   |
| NUDT3 | hsa-miR-3907      |
| NUDT3 | hsa-miR-7976      |

|       |                   |
|-------|-------------------|
| NUDT3 | hsa-miR-152       |
| NUDT3 | hsa-miR-541-3p    |
| NUDT3 | hsa-miR-763       |
| NUDT3 | hsa-miR-766-5p    |
| NUDT3 | hsa-miR-519e-3p   |
| NUDT3 | hsa-miR-5088-3p   |
| NUDT3 | hsa-miR-450a-1-3p |
| NUDT3 | hsa-miR-7305-5p   |
| NUDT3 | hsa-miR-7847-3p   |
| NUDT3 | hsa-miR-362-5p    |
| NUDT3 | hsa-miR-653       |
| NUDT3 | hsa-miR-329a      |
| NUDT3 | hsa-miR-290b-5p   |
| NUDT3 | hsa-miR-4419a     |
| NUDT3 | hsa-miR-186-5p    |
| NUDT3 | hsa-miR-7371j-3p  |
| NUDT3 | hsa-miR-4723-5p   |
| NUDT3 | hsa-miR-3472      |
| NUDT3 | hsa-miR-2375      |
| NUDT3 | hsa-miR-25-5p     |
| NUDT3 | hsa-miR-5591-5p   |
| NUDT3 | hsa-miR-579       |
| NUDT3 | hsa-let-7         |
| NUDT3 | hsa-miR-633       |
| NUDT3 | hsa-miR-3617-5p   |
| NUDT3 | hsa-miR-3082-3p   |
| NUDT3 | hsa-miR-7257-3p   |
| NUDT3 | hsa-miR-8869      |
| NUDT3 | hsa-miR-2284r     |
| NUDT3 | hsa-miR-5698      |
| NUDT3 | hsa-miR-1185-5p   |
| NUDT3 | hsa-miR-2114-5p   |
| NUDT3 | hsa-miR-8818      |
| NUDT3 | hsa-miR-637       |
| NUDT3 | hsa-miR-7189-3p   |
| NUDT3 | hsa-miR-702-5p    |
| NUDT3 | hsa-miR-502b      |
| NUDT3 | hsa-miR-7386i-5p  |
| NUDT3 | hsa-miR-195-5p    |
| NUDT3 | hsa-miR-6927-5p   |
| NUDT3 | hsa-miR-6858-3p   |
| NUDT3 | hsa-miR-497-5p    |
| NUDT3 | hsa-miR-548ae-5p  |
| NUDT3 | hsa-miR-140-3p    |
| NUDT3 | hsa-miR-6077      |
| NUDT3 | hsa-miR-660-3p    |

|       |                  |
|-------|------------------|
| NUDT3 | hsa-miR-7002-5p  |
| NUDT3 | hsa-miR-6834-3p  |
| NUDT3 | hsa-miR-8890     |
| NUDT3 | hsa-miR-4435     |
| NUDT3 | hsa-miR-6939-5p  |
| NUDT3 | hsa-miR-7229-3p  |
| NUDT3 | hsa-miR-7978     |
| NUDT3 | hsa-miR-460-3p   |
| NUDT3 | hsa-miR-2131-5p  |
| NUDT3 | hsa-miR-7398r-3p |
| NUDT3 | hsa-miR-509-5p   |
| NUDT3 | hsa-miR-2300-5p  |
| NUDT3 | hsa-miR-3921     |
| NUDT3 | hsa-miR-6984-3p  |
| NUDT3 | hsa-miR-1603     |
| NUDT3 | hsa-miR-135-5p   |
| NUDT3 | hsa-miR-2386     |
| NUDT3 | hsa-miR-6524     |
| NUDT3 | hsa-miR-8823     |
| NUDT3 | hsa-miR-383-5p.2 |
| NUDT3 | hsa-miR-5626-5p  |
| NUDT3 | hsa-miR-684      |
| NUDT3 | hsa-miR-3532-5p  |
| NUDT3 | hsa-miR-2284z    |
| NUDT3 | hsa-miR-6794-3p  |
| NUDT3 | hsa-miR-6800-5p  |
| NUDT3 | hsa-miR-188-5p   |
| NUDT3 | hsa-miR-1305     |
| NUDT3 | hsa-miR-7386m-5p |
| NUDT3 | hsa-miR-522-3p   |
| NUDT3 | hsa-miR-3689a-5p |
| NUDT3 | hsa-miR-2114-5p  |
| NUDT3 | hsa-miR-7655-5p  |
| NUDT3 | hsa-miR-8854     |
| NUDT3 | hsa-miR-3190-3p  |
| NUDT3 | hsa-miR-490-3p   |
| NUDT3 | hsa-miR-713      |
| NUDT3 | hsa-miR-181d-3p  |
| NUDT3 | hsa-miR-501-5p   |
| NUDT3 | hsa-miR-4772-5p  |
| NUDT3 | hsa-miR-7682-5p  |
| NUDT3 | hsa-miR-3690     |
| NUDT3 | hsa-miR-1230     |
| NUDT3 | hsa-miR-543      |
| NUDT3 | hsa-miR-6069     |
| NUDT3 | hsa-miR-7193-5p  |

|       |                  |
|-------|------------------|
| NUDT3 | hsa-miR-4739     |
| NUDT3 | hsa-miR-7442-5p  |
| NUDT3 | hsa-miR-1388-3p  |
| NUDT3 | hsa-miR-6517     |
| NUDT3 | hsa-miR-507b     |
| NUDT3 | hsa-miR-649      |
| NUDT3 | hsa-miR-548am-5p |
| NUDT3 | hsa-miR-133ab    |
| NUDT3 | hsa-miR-184-5p   |
| NUDT3 | hsa-miR-4691-5p  |
| NUDT3 | hsa-miR-3132     |
| NUDT3 | hsa-miR-6593-5p  |
| NUDT3 | hsa-miR-483-3p   |
| NUDT3 | hsa-miR-7386e-3p |
| NUDT3 | hsa-miR-1271-5p  |
| NUDT3 | hsa-miR-7349-3p  |
| NUDT3 | hsa-miR-1721     |
| NUDT3 | hsa-miR-23-5p    |
| NUDT3 | hsa-miR-185-5p   |
| NUDT3 | hsa-miR-7330-3p  |
| NUDT3 | hsa-miR-4312     |
| NUDT3 | hsa-miR-3065-3p  |
| NUDT3 | hsa-miR-6950-3p  |
| NUDT3 | hsa-miR-548y     |
| NUDT3 | hsa-miR-4536-5p  |
| NUDT3 | hsa-miR-7323-5p  |
| NUDT3 | hsa-miR-1736-3p  |
| NUDT3 | hsa-miR-16-5p    |
| NUDT3 | hsa-miR-498      |
| NUDT3 | hsa-miR-502-5p   |
| NUDT3 | hsa-miR-3072-5p  |
| NUDT3 | hsa-miR-616-3p   |
| NUDT3 | hsa-miR-34c-5p   |
| NUDT3 | hsa-miR-548j-3p  |
| NUDT3 | hsa-miR-5089-3p  |
| NUDT3 | hsa-miR-2285j    |
| NUDT3 | hsa-miR-6619-5p  |
| NUDT3 | hsa-miR-5132-5p  |
| NUDT3 | hsa-miR-2129     |
| NUDT3 | hsa-miR-4674     |
| NUDT3 | hsa-miR-9768-3p  |
| NUDT3 | hsa-miR-7386g-5p |
| NUDT3 | hsa-miR-7671-5p  |
| NUDT3 | hsa-miR-5590-5p  |
| NUDT3 | hsa-miR-506-3p   |
| NUDT3 | hsa-miR-2405     |

|       |                  |
|-------|------------------|
| NUDT3 | hsa-miR-2285i    |
| NUDT3 | hsa-miR-6630-3p  |
| NUDT3 | hsa-miR-2364     |
| NUDT3 | hsa-miR-338-5p   |
| NUDT3 | hsa-miR-548n     |
| NUDT3 | hsa-miR-425-5p   |
| NUDT3 | hsa-miR-9-5p     |
| NUDT3 | hsa-miR-2437     |
| NUDT3 | hsa-miR-425      |
| NUDT3 | hsa-miR-8825     |
| NUDT3 | hsa-miR-7296-5p  |
| NUDT3 | hsa-miR-7467-3p  |
| NUDT3 | hsa-miR-200bc-3p |
| NUDT3 | hsa-miR-8117     |
| NUDT3 | hsa-miR-3929     |
| NUDT3 | hsa-miR-7260-3p  |
| NUDT3 | hsa-miR-28-5p    |
| NUDT3 | hsa-miR-576-5p   |
| NUDT3 | hsa-miR-8107     |
| NUDT3 | hsa-let-7b-3p    |
| NUDT3 | hsa-miR-7162-3p  |
| NUDT3 | hsa-miR-16-3p    |
| NUDT3 | hsa-miR-2311     |
| NUDT3 | hsa-miR-3936     |
| NUDT3 | hsa-miR-939-3p   |
| NUDT3 | hsa-miR-451b     |
| NUDT3 | hsa-miR-2355-5p  |
| NUDT3 | hsa-miR-4694-3p  |
| NUDT3 | hsa-miR-548k     |
| NUDT3 | hsa-miR-892-3p   |
| NUDT3 | hsa-miR-7108-5p  |
| NUDT3 | hsa-miR-875      |
| NUDT3 | hsa-miR-7155-3p  |
| NUDT3 | hsa-miR-6858-5p  |
| NUDT3 | hsa-miR-1205     |
| NUDT3 | hsa-miR-6866-5p  |
| NUDT3 | hsa-miR-9a-3p    |
| NUDT3 | hsa-miR-3539     |
| NUDT3 | hsa-miR-7390-5p  |
| NUDT3 | hsa-miR-3194-5p  |
| NUDT3 | hsa-miR-7350-3p  |
| NUDT3 | hsa-let-7afk-3p  |
| NUDT3 | hsa-miR-7089-3p  |
| NUDT3 | hsa-miR-3062-3p  |
| NUDT3 | hsa-miR-577-3p   |
| NUDT3 | hsa-miR-182-3p   |

|       |                  |
|-------|------------------|
| NUDT3 | hsa-miR-1278     |
| NUDT3 | hsa-miR-1571     |
| NUDT3 | hsa-miR-4437     |
| NUDT3 | hsa-miR-873-3p   |
| NUDT3 | hsa-miR-23a-3p   |
| NUDT3 | hsa-miR-7386e-5p |
| NUDT3 | hsa-miR-654-5p   |
| NUDT3 | hsa-miR-6994-5p  |
| NUDT3 | hsa-miR-7180-5p  |
| NUDT3 | hsa-miR-3689d    |
| NUDT3 | hsa-miR-146b-3p  |
| NUDT3 | hsa-miR-422      |
| NUDT3 | hsa-miR-4488     |
| NUDT3 | hsa-miR-6796-3p  |
| NUDT3 | hsa-miR-6902-5p  |
| NUDT3 | hsa-miR-670-5p   |
| NUDT3 | hsa-miR-378-3p   |
| NUDT3 | hsa-miR-7684-5p  |
| NUDT3 | hsa-miR-7398a-3p |
| NUDT3 | hsa-miR-7291-3p  |
| NUDT3 | hsa-miR-7077-5p  |
| NUDT3 | hsa-miR-6995-5p  |
| NUDT3 | hsa-miR-7351-3p  |
| NUDT3 | hsa-miR-4666a-3p |
| NUDT3 | hsa-miR-8808     |
| NUDT3 | hsa-miR-6747-3p  |
| NUDT3 | hsa-miR-6751-5p  |
| NUDT3 | hsa-miR-3127-5p  |
| NUDT3 | hsa-miR-3175     |
| NUDT3 | hsa-miR-376c     |
| NUDT3 | hsa-miR-8066     |
| NUDT3 | hsa-miR-8063     |
| NUDT3 | hsa-miR-340-5p   |
| NUDT3 | hsa-miR-7377-3p  |
| NUDT3 | hsa-miR-375      |
| NUDT3 | hsa-miR-4475     |
| NUDT3 | hsa-miR-3090-3p  |
| NUDT3 | hsa-miR-7352-3p  |
| NUDT3 | hsa-miR-1827     |
| NUDT3 | hsa-miR-200bc    |
| NUDT3 | hsa-miR-525-5p   |
| NUDT3 | hsa-miR-2320-5p  |
| NUDT3 | hsa-miR-344-5p   |
| NUDT3 | hsa-miR-548t-3p  |
| NUDT3 | hsa-miR-206      |
| NUDT3 | hsa-miR-6838-3p  |

|       |                  |
|-------|------------------|
| NUDT3 | hsa-miR-7183-3p  |
| NUDT3 | hsa-miR-5007-3p  |
| NUDT3 | hsa-miR-708-5p   |
| NUDT3 | hsa-miR-2393     |
| NUDT3 | hsa-miR-92-3p    |
| NUDT3 | hsa-miR-1981-5p  |
| NUDT3 | hsa-miR-6582-5p  |
| NUDT3 | hsa-miR-6124     |
| NUDT3 | hsa-miR-124-3p   |
| NUDT3 | hsa-miR-148-3p   |
| NUDT3 | hsa-miR-3653-5p  |
| NUDT3 | hsa-miR-6749-3p  |
| NUDT3 | hsa-miR-3105-3p  |
| NUDT3 | hsa-miR-6362     |
| NUDT3 | hsa-miR-3187-5p  |
| NUDT3 | hsa-miR-1-3p     |
| NUDT3 | hsa-miR-1548-5p  |
| NUDT3 | hsa-miR-7366-5p  |
| NUDT3 | hsa-miR-208a-5p  |
| NUDT3 | hsa-miR-6799-5p  |
| NUDT3 | hsa-miR-677-3p   |
| NUDT3 | hsa-miR-6416-3p  |
| NUDT3 | hsa-miR-8550     |
| NUDT3 | hsa-miR-6837-5p  |
| NUDT3 | hsa-miR-3557-5p  |
| NUDT3 | hsa-miR-1582     |
| NUDT3 | hsa-miR-2322-3p  |
| NUDT3 | hsa-miR-218-1-3p |
| NUDT3 | hsa-miR-3689f    |
| NUDT3 | hsa-miR-6940-5p  |
| NUDT3 | hsa-miR-4418     |
| NUDT3 | hsa-miR-2338     |
| NUDT3 | hsa-miR-4704-5p  |
| NUDT3 | hsa-miR-577      |
| NUDT3 | hsa-miR-6503-3p  |
| NUDT3 | hsa-miR-548ah-3p |
| NUDT3 | hsa-miR-6905-3p  |
| NUDT3 | hsa-miR-3574     |
| NUDT3 | hsa-miR-8898     |
| NUDT3 | hsa-miR-33       |
| NUDT3 | hsa-miR-3149     |
| NUDT3 | hsa-miR-7373b-3p |
| NUDT3 | hsa-miR-4679     |
| NUDT3 | hsa-miR-4528     |
| NUDT3 | hsa-miR-336-3p   |
| NUDT3 | hsa-miR-876-3p   |



|       |                 |
|-------|-----------------|
| NUDT3 | hsa-miR-1625-3p |
| NUDT3 | hsa-miR-6758-3p |
| NUDT3 | hsa-miR-7-5p    |
| NUDT3 | hsa-miR-3909    |
| NUDT3 | hsa-miR-2470    |
| NUDT3 | hsa-miR-2292    |
| NUDT3 | hsa-miR-6996-5p |
| NUDT3 | hsa-miR-1271-3p |
| NUDT3 | hsa-miR-7203-3p |
| NUDT3 | hsa-miR-7091-3p |
| NUDT3 | hsa-miR-7012-5p |
| NUDT3 | hsa-miR-361-5p  |
| NUDT3 | hsa-miR-487-5p  |
| NUDT3 | hsa-miR-5089-5p |
| NUDT3 | hsa-miR-4287    |
| NUDT3 | hsa-miR-3533    |
| NUDT3 | hsa-miR-7180    |
| NUDT3 | hsa-miR-6772-3p |
| NUDT3 | hsa-miR-7266-3p |
| NUDT3 | hsa-miR-7191-5p |
| NUDT3 | hsa-miR-450b-5p |
| NUDT3 | hsa-miR-219-3p  |
| NUDT3 | hsa-miR-6958-3p |
| NUDT3 | hsa-miR-7220-5p |
| NUDT3 | hsa-miR-129-5p  |
| NUDT3 | hsa-miR-7676-5p |
| NUDT3 | hsa-miR-8875    |
| NUDT3 | hsa-miR-6918-3p |
| NUDT3 | hsa-miR-4267    |
| NUDT3 | hsa-miR-6819-3p |
| NUDT3 | hsa-miR-7348-5p |
| NUDT3 | hsa-miR-3112-3p |
| NUDT3 | hsa-miR-8076    |
| NUDT3 | hsa-miR-2344    |
| NUDT3 | hsa-miR-127-5p  |
| NUDT3 | hsa-miR-210     |
| NUDT3 | hsa-miR-196     |
| NUDT3 | hsa-miR-561-3p  |
| NUDT3 | hsa-miR-339-5p  |
| NUDT3 | hsa-miR-5003-5p |
| NUDT3 | hsa-miR-7193-3p |
| NUDT3 | hsa-miR-100-3p  |
| NUDT3 | hsa-miR-4303    |
| NUDT3 | hsa-miR-1814    |
| NUDT3 | hsa-miR-6613-3p |
| NUDT3 | hsa-miR-6762-3p |

|       |                   |
|-------|-------------------|
| NUDT3 | hsa-miR-7013-3p   |
| NUDT3 | hsa-miR-6934-5p   |
| NUDT3 | hsa-miR-3157-5p   |
| NUDT3 | hsa-miR-617       |
| NUDT3 | hsa-miR-423-3p    |
| NUDT3 | hsa-miR-7354-5p   |
| NUDT3 | hsa-miR-7672-5p   |
| NUDT3 | hsa-miR-1460      |
| NUDT3 | hsa-miR-3082-5p   |
| NUDT3 | hsa-miR-7389-5p   |
| NUDT3 | hsa-miR-7678-3p   |
| NUDT3 | hsa-miR-4632-5p   |
| NUDT3 | hsa-miR-6818-5p   |
| NUDT3 | hsa-miR-6842-5p   |
| NUDT3 | hsa-miR-6983-5p   |
| NUDT3 | hsa-miR-3136-3p   |
| NUDT3 | hsa-miR-6880-3p   |
| NUDT3 | hsa-miR-200ab-5p  |
| NUDT3 | hsa-miR-488-3p    |
| NUDT3 | hsa-miR-3584-3p   |
| NUDT3 | hsa-miR-1811      |
| NUDT3 | hsa-miR-1229-3p   |
| NUDT3 | hsa-miR-3102-3p   |
| NUDT3 | hsa-miR-342-3p    |
| NUDT3 | hsa-miR-454-5p    |
| NUDT3 | hsa-miR-2488      |
| NUDT3 | hsa-miR-675-3p    |
| NUDT3 | hsa-miR-181b-1-3p |
| NUDT3 | hsa-miR-6773-5p   |
| NUDT3 | hsa-miR-2909      |
| NUDT3 | hsa-miR-7188-3p   |
| NUDT3 | hsa-miR-4482-5p   |
| NUDT3 | hsa-miR-4668-5p   |
| NUDT3 | hsa-miR-516       |
| NUDT3 | hsa-miR-192-5p    |
| NUDT3 | hsa-miR-212-5p    |
| NUDT3 | hsa-miR-8849      |
| NUDT3 | hsa-miR-519e-5p   |
| NUDT3 | hsa-miR-4645-3p   |
| NUDT3 | hsa-miR-7386l-3p  |
| NUDT3 | hsa-miR-7177-5p   |
| NUDT3 | hsa-miR-659-5p    |
| NUDT3 | hsa-miR-7653-5p   |
| NUDT3 | hsa-miR-3143      |
| NUDT3 | hsa-miR-7158-3p   |
| NUDT3 | hsa-miR-6828-3p   |

|       |                 |
|-------|-----------------|
| NUDT3 | hsa-miR-2890    |
| NUDT3 | hsa-miR-3079-3p |
| NUDT3 | hsa-miR-2443    |
| NUDT3 | hsa-miR-7232-5p |
| NUDT3 | hsa-miR-3614-3p |
| NUDT3 | hsa-miR-522-3p  |
| NUDT3 | hsa-miR-3162-5p |
| NUDT3 | hsa-miR-7163-3p |
| NUDT3 | hsa-miR-6773-3p |
| NUDT3 | hsa-miR-589-3p  |
| NUDT3 | hsa-miR-519-3p  |
| NUDT3 | hsa-miR-579-3p  |
| NUDT3 | hsa-miR-377-3p  |
| NUDT3 | hsa-miR-7196-5p |
| NUDT3 | hsa-miR-2284k   |
| NUDT3 | hsa-miR-5694    |
| NUDT3 | hsa-miR-6832-3p |
| NUDT3 | hsa-miR-300-3p  |
| NUDT3 | hsa-miR-367-3p  |
| NUDT3 | hsa-miR-3183    |
| NUDT3 | hsa-miR-6735-3p |
| NUDT3 | hsa-miR-610     |
| NUDT3 | hsa-miR-3087-5p |
| NUDT3 | hsa-miR-6384    |
| NUDT3 | hsa-miR-202-5p  |
| NUDT3 | hsa-miR-6812-5p |
| NUDT3 | hsa-miR-130a-5p |
| NUDT3 | hsa-miR-7307-3p |
| NUDT3 | hsa-miR-3914    |
| NUDT3 | hsa-miR-4697-3p |
| NUDT3 | hsa-miR-7281-3p |
| NUDT3 | hsa-miR-5006-3p |
| NUDT3 | hsa-miR-338-3p  |
| NUDT3 | hsa-miR-4742-5p |
| NUDT3 | hsa-miR-3173-5p |
| NUDT3 | hsa-miR-6856-5p |
| NUDT3 | hsa-miR-7309-5p |
| NUDT3 | hsa-miR-3692-3p |
| NUDT3 | hsa-miR-6793-3p |
| NUDT3 | hsa-miR-6810-5p |
| NUDT3 | hsa-miR-7367-3p |
| NUDT3 | hsa-miR-3912-5p |
| NUDT3 | hsa-miR-6132    |
| NUDT3 | hsa-miR-690     |
| NUDT3 | hsa-miR-3535    |
| NUDT3 | hsa-miR-6128    |

|       |                   |
|-------|-------------------|
| NUDT3 | hsa-miR-4687-3p   |
| NUDT3 | hsa-miR-496a-3p.1 |
| NUDT3 | hsa-miR-378c      |
| NUDT3 | hsa-miR-548ad-3p  |
| NUDT3 | hsa-miR-520gh     |
| NUDT3 | hsa-miR-4658      |
| NUDT3 | hsa-miR-4283      |
| NUDT3 | hsa-miR-4325      |
| NUDT3 | hsa-miR-7385-5p   |
| NUDT3 | hsa-miR-26b-3p    |
| NUDT3 | hsa-miR-519       |
| NUDT3 | hsa-miR-7076-5p   |
| NUDT3 | hsa-miR-629-3p    |
| NUDT3 | hsa-miR-4705      |
| NUDT3 | hsa-miR-7053-3p   |
| NUDT3 | hsa-miR-7222-3p   |
| NUDT3 | hsa-miR-669m-5p   |
| NUDT3 | hsa-miR-505-3p.2  |
| NUDT3 | hsa-miR-2362      |
| NUDT3 | hsa-miR-6807-5p   |
| NUDT3 | hsa-miR-3109-3p   |
| NUDT3 | hsa-miR-7859      |
| NUDT3 | hsa-miR-4654      |
| NUDT3 | hsa-miR-7688-3p   |
| NUDT3 | hsa-miR-7086-5p   |
| NUDT3 | hsa-miR-2284l     |
| NUDT3 | hsa-miR-223-5p    |
| NUDT3 | hsa-miR-5708      |
| NUDT3 | hsa-miR-412-3p    |
| NUDT3 | hsa-miR-6935-3p   |
| NUDT3 | hsa-miR-7245-3p   |
| NUDT3 | hsa-miR-205-5p    |
| NUDT3 | hsa-miR-24-3p     |
| NUDT3 | hsa-miR-7218-5p   |
| NUDT3 | hsa-miR-7300-5p   |
| NUDT3 | hsa-miR-7301-3p   |
| NUDT3 | hsa-miR-1615      |
| NUDT3 | hsa-miR-4763-3p   |
| NUDT3 | hsa-miR-6526      |
| NUDT3 | hsa-miR-548c-5p   |
| NUDT3 | hsa-miR-4530      |
| NUDT3 | hsa-miR-3544-5p   |
| NUDT3 | hsa-miR-6509-3p   |
| NUDT3 | hsa-miR-6891-5p   |
| NUDT3 | hsa-miR-7398h-3p  |
| NUDT3 | hsa-miR-4477a     |

|       |                  |
|-------|------------------|
| NUDT3 | hsa-miR-23a-5p   |
| NUDT3 | hsa-miR-142-3p.1 |
| NUDT3 | hsa-miR-34b-3p   |
| NUDT3 | hsa-miR-8899     |
| NUDT3 | hsa-miR-6514-5p  |
| NUDT3 | hsa-miR-7442-3p  |
| NUDT3 | hsa-miR-8833     |
| NUDT3 | hsa-miR-6895-5p  |
| NUDT3 | hsa-miR-337-3p   |
| NUDT3 | hsa-miR-153-5p   |
| NUDT3 | hsa-miR-15a-3p   |
| NUDT3 | hsa-miR-6836-3p  |
| NUDT3 | hsa-miR-7655-3p  |
| NUDT3 | hsa-miR-3605-5p  |
| NUDT3 | hsa-miR-7038-3p  |
| NUDT3 | hsa-miR-15c-3p   |
| NUDT3 | hsa-miR-434-5p   |
| NUDT3 | hsa-miR-7456-5p  |
| NUDT3 | hsa-miR-5193     |
| NUDT3 | hsa-miR-4697-5p  |
| NUDT3 | hsa-miR-624-3p   |
| NUDT3 | hsa-miR-5693     |
| NUDT3 | hsa-miR-6792-5p  |
| NUDT3 | hsa-miR-1545b-5p |
| NUDT3 | hsa-miR-1769-5p  |
| NUDT3 | hsa-miR-6321     |
| NUDT3 | hsa-miR-424-3p   |
| NUDT3 | hsa-miR-200a-3p  |
| NUDT3 | hsa-miR-6837-3p  |
| NUDT3 | hsa-miR-2313-5p  |
| NUDT3 | hsa-miR-515-5p   |
| NUDT3 | hsa-miR-32-3p    |
| NUDT3 | hsa-miR-3188     |
| NUDT3 | hsa-miR-6772-5p  |
| NUDT3 | hsa-miR-5192     |
| NUDT3 | hsa-miR-7268-3p  |
| NUDT3 | hsa-miR-1547-5p  |
| NUDT3 | hsa-miR-7246-3p  |
| NUDT3 | hsa-miR-4793-3p  |
| NUDT3 | hsa-miR-7215-3p  |
| NUDT3 | hsa-miR-7371b-5p |
| NUDT3 | hsa-miR-7314-5p  |
| NUDT3 | hsa-miR-7067-5p  |
| NUDT3 | hsa-miR-92a-1-5p |
| NUDT3 | hsa-miR-519-5p   |
| NUDT3 | hsa-miR-7363-5p  |

|       |                 |
|-------|-----------------|
| NUDT3 | hsa-miR-6554-5p |
| NUDT3 | hsa-miR-502-5p  |
| NUDT3 | hsa-miR-3187-3p |
| NUDT3 | hsa-miR-331-3p  |
| NUDT3 | hsa-miR-92-5p   |
| NUDT3 | hsa-miR-6728-5p |
| NUDT3 | hsa-miR-6617-3p |
| NUDT3 | hsa-miR-7024-3p |
| NUDT3 | hsa-miR-489-5p  |
| NUDT3 | hsa-miR-203b-3p |
| NUDT3 | hsa-miR-32-5p   |
| NUDT3 | hsa-miR-2341    |
| NUDT3 | hsa-miR-5706    |
| NUDT3 | hsa-miR-8865    |
| NUDT3 | hsa-miR-103-5p  |
| NUDT3 | hsa-miR-2114-3p |
| NUDT3 | hsa-miR-549-3p  |
| NUDT3 | hsa-miR-211-5p  |
| NUDT3 | hsa-miR-513a-5p |
| NUDT3 | hsa-miR-1575    |
| NUDT3 | hsa-miR-877-5p  |
| NUDT3 | hsa-miR-8838    |
| NUDT3 | hsa-miR-2328-3p |
| NUDT3 | hsa-miR-3658    |
| NUDT3 | hsa-miR-216c-5p |
| NUDT3 | hsa-miR-4646-5p |
| NUDT3 | hsa-miR-2284    |
| NUDT3 | hsa-miR-1237-3p |
| NUDT3 | hsa-miR-424-5p  |
| NUDT3 | hsa-miR-550b-3p |
| NUDT3 | hsa-miR-1772-5p |
| NUDT3 | hsa-miR-7444-3p |
| NUDT3 | hsa-miR-496b    |
| NUDT3 | hsa-miR-640     |
| NUDT3 | hsa-miR-409     |
| NUDT3 | hsa-miR-2295    |
| NUDT3 | hsa-miR-6835-5p |
| NUDT3 | hsa-miR-7660-5p |
| NUDT3 | hsa-miR-6340    |
| NUDT3 | hsa-miR-6238    |
| NUDT3 | hsa-miR-2446    |
| NUDT3 | hsa-miR-664a-3p |
| NUDT3 | hsa-miR-1544-3p |
| NUDT3 | hsa-miR-2284m   |
| NUDT3 | hsa-miR-2483    |
| NUDT3 | hsa-miR-3126-3p |

|       |                 |
|-------|-----------------|
| NUDT3 | hsa-miR-4683    |
| NUDT3 | hsa-miR-7177-3p |
| NUDT3 | hsa-miR-769     |
| NUDT3 | hsa-miR-3908    |
| NUDT3 | hsa-miR-6560-3p |
| NUDT3 | hsa-miR-544b    |
| NUDT3 | hsa-miR-7656-3p |
| NUDT3 | hsa-miR-7192-3p |
| NUDT3 | hsa-miR-6624-3p |
| NUDT3 | hsa-miR-3123    |
| NUDT3 | hsa-miR-635     |
| NUDT3 | hsa-miR-7280-5p |
| NUDT3 | hsa-miR-145-3p  |
| NUDT3 | hsa-miR-7171-5p |
| NUDT3 | hsa-miR-1796    |
| NUDT3 | hsa-miR-144-5p  |
| NUDT3 | hsa-miR-4781-3p |
| NUDT3 | hsa-miR-1955-5p |
| NUDT3 | hsa-miR-6884-3p |
| NUDT3 | hsa-miR-671-5p  |
| NUDT3 | hsa-miR-6821-3p |
| NUDT3 | hsa-miR-329     |
| NUDT3 | hsa-miR-2347    |
| NUDT3 | hsa-miR-1958    |
| NUDT3 | hsa-miR-5684    |
| NUDT3 | hsa-miR-5196-5p |
| NUDT3 | hsa-miR-4438    |
| NUDT3 | hsa-miR-7319-3p |
| NUDT3 | hsa-miR-6877-3p |
| NUDT3 | hsa-miR-7180-3p |
| NUDT3 | hsa-miR-3103-3p |
| NUDT3 | hsa-miR-6781-3p |
| NUDT3 | hsa-miR-514a-5p |
| NUDT3 | hsa-miR-5621-3p |
| NUDT3 | hsa-miR-548x-3p |
| NUDT3 | hsa-miR-6861-3p |
| NUDT3 | hsa-miR-1636    |
| NUDT3 | hsa-miR-196a-3p |
| NUDT3 | hsa-miR-4716    |
| NUDT3 | hsa-miR-1650    |
| NUDT3 | hsa-miR-5626-3p |
| NUDT3 | hsa-miR-1184    |
| NUDT3 | hsa-miR-7679-5p |
| NUDT3 | hsa-miR-5580-3p |
| NUDT3 | hsa-miR-3552    |
| NUDT3 | hsa-miR-3197    |

|       |                  |
|-------|------------------|
| NUDT3 | hsa-miR-1249-3p  |
| NUDT3 | hsa-miR-4666a-5p |
| NUDT3 | hsa-miR-344c-3p  |
| NUDT3 | hsa-miR-4789-3p  |
| NUDT3 | hsa-miR-3978     |
| NUDT3 | hsa-miR-8860     |
| NUDT3 | hsa-miR-8795     |
| NUDT3 | hsa-miR-24-3p    |
| NUDT3 | hsa-miR-493-5p   |
| NUDT3 | hsa-miR-559      |
| NUDT3 | hsa-miR-1255a    |
| NUDT3 | hsa-miR-7042-5p  |
| NUDT3 | hsa-miR-6879-5p  |
| NUDT3 | hsa-miR-3922-3p  |
| NUDT3 | hsa-miR-4310     |
| NUDT3 | hsa-miR-6647-5p  |
| NUDT3 | hsa-miR-700-5p   |
| NUDT3 | hsa-miR-6945-3p  |
| NUDT3 | hsa-miR-2285c    |
| NUDT3 | hsa-miR-876-5p   |
| NUDT3 | hsa-miR-6848-3p  |
| NUDT3 | hsa-miR-126-5p   |
| NUDT3 | hsa-miR-6780b-5p |
| NUDT3 | hsa-miR-6917-5p  |
| NUDT3 | hsa-miR-6509-5p  |
| NUDT3 | hsa-miR-295-5p   |
| NUDT3 | hsa-miR-1191b-3p |
| NUDT3 | hsa-miR-3583-5p  |
| NUDT3 | hsa-miR-29e      |
| NUDT3 | hsa-miR-500      |
| NUDT3 | hsa-miR-7357-3p  |
| NUDT3 | hsa-miR-7181-5p  |
| NUDT3 | hsa-miR-4793-5p  |
| NUDT3 | hsa-miR-6865-3p  |
| NUDT3 | hsa-miR-2385-5p  |
| NUDT3 | hsa-miR-8873a    |
| NUDT3 | hsa-miR-7658-5p  |
| NUDT3 | hsa-miR-4729     |
| NUDT3 | hsa-miR-3063-3p  |
| NUDT3 | hsa-miR-1202     |
| NUDT3 | hsa-miR-627-3p   |
| NUDT3 | hsa-miR-365b-5p  |
| NUDT3 | hsa-miR-4731-5p  |
| NUDT3 | hsa-miR-6946-3p  |
| NUDT3 | hsa-miR-6122-5p  |
| NUDT3 | hsa-miR-548av-3p |



|       |                  |
|-------|------------------|
| NUDT3 | hsa-miR-3092-5p  |
| NUDT3 | hsa-miR-8874     |
| NUDT3 | hsa-miR-7392-5p  |
| NUDT3 | hsa-miR-5096     |
| NUDT3 | hsa-miR-3924     |
| NUDT3 | hsa-miR-3150b-3p |
| NUDT3 | hsa-miR-4292     |
| NUDT3 | hsa-miR-7335-5p  |
| NUDT3 | hsa-miR-3584-5p  |
| NUDT3 | hsa-miR-8101     |
| NUDT3 | hsa-miR-6809-3p  |
| NUDT3 | hsa-miR-520f-5p  |
| NUDT3 | hsa-miR-505-3p.1 |
| NUDT3 | hsa-miR-7217-3p  |
| NUDT3 | hsa-miR-878-3p   |
| NUDT3 | hsa-miR-7364-3p  |
| NUDT3 | hsa-miR-363-5p   |
| NUDT3 | hsa-miR-3083-5p  |
| NUDT3 | hsa-miR-3528     |
| NUDT3 | hsa-miR-6516-3p  |
| NUDT3 | hsa-miR-2454-3p  |
| NUDT3 | hsa-miR-1842     |
| NUDT3 | hsa-miR-6418-5p  |
| NUDT3 | hsa-miR-300      |
| NUDT3 | hsa-miR-1897-3p  |
| NUDT3 | hsa-miR-3084-3p  |
| NUDT3 | hsa-miR-5010-5p  |
| NUDT3 | hsa-miR-223-3p   |
| NUDT3 | hsa-miR-2430     |
| NUDT3 | hsa-miR-6783-5p  |
| NUDT3 | hsa-miR-6973a-5p |
| NUDT3 | hsa-miR-2887     |
| NUDT3 | hsa-miR-6987-5p  |
| NUDT3 | hsa-miR-1777     |
| NUDT3 | hsa-miR-2127     |
| NUDT3 | hsa-miR-3971     |
| NUDT3 | hsa-miR-2395     |
| NUDT3 | hsa-miR-512-5p   |
| NUDT3 | hsa-miR-8079     |
| NUDT3 | hsa-miR-4276     |
| NUDT3 | hsa-miR-4503     |
| NUDT3 | hsa-miR-196-5p   |
| NUDT3 | hsa-miR-3199     |
| NUDT3 | hsa-miR-7390-3p  |
| NUDT3 | hsa-miR-1238-3p  |
| NUDT3 | hsa-miR-7371e-5p |

|       |                      |
|-------|----------------------|
| NUDT3 | hsa-miR-29-3p        |
| NUDT3 | hsa-miR-2466-5p      |
| NUDT3 | hsa-miR-6726-5p      |
| NUDT3 | hsa-miR-1195         |
| NUDT3 | hsa-miR-466f-5p      |
| NUDT3 | hsa-miR-6872-3p      |
| NUDT3 | hsa-miR-4741         |
| NUDT3 | hsa-miR-6506-5p      |
| NUDT3 | hsa-miR-6504-3p      |
| NUDT3 | hsa-miR-7273-3p      |
| NUDT3 | hsa-miR-2293         |
| NUDT3 | hsa-miR-7190-5p      |
| NUDT3 | hsa-miR-8891         |
| NUDT3 | hsa-miR-183-5p       |
| NUDT3 | hsa-miR-7237-3p      |
| NUDT3 | hsa-miR-139-5p       |
| NUDT3 | hsa-miR-7862         |
| NUDT3 | hsa-miR-4760-3p      |
| NUDT3 | hsa-miR-377-3p       |
| NUDT3 | hsa-miR-3192         |
| NUDT3 | hsa-miR-6527         |
| NUDT3 | hsa-miR-577-5p       |
| NUDT3 | hsa-miR-6957-3p      |
| NUDT3 | hsa-miR-34b-3p       |
| NUDT3 | hsa-miR-193a-5p      |
| NUDT3 | hsa-miR-361-3p       |
| NUDT3 | hsa-miR-432-5p       |
| NUDT3 | hsa-miR-467f         |
| NUDT3 | hsa-miR-1915-5p      |
| NUDT3 | hsa-miR-6959-5p      |
| NUDT3 | hsa-miR-26c          |
| NUDT3 | hsa-miR-4534         |
| NUDT3 | hsa-miR-548h-3p      |
| NUDT3 | hsa-miR-138-5p       |
| NUDT3 | hsa-miR-548ab        |
| NUDT3 | hsa-miR-4323         |
| NUDT3 | hsa-miR-128-5p       |
| NUDT3 | hsa-miR-2411-3p      |
| NUDT3 | hsa-miR-20b-3p       |
| NUDT3 | hsa-miR-1540         |
| NUDT3 | hsa-miR-6836-5p      |
| NUDT3 | hsa-miR-1679         |
| NUDT3 | hsa-miR-1251         |
| NUDT3 | hsa-miR-7291-5p      |
| NUDT3 | hsa-miR-3102-3p.2-3p |
| NUDT3 | hsa-miR-2291         |

|       |                   |
|-------|-------------------|
| NUDT3 | hsa-miR-4524b-3p  |
| NUDT3 | hsa-miR-7285-5p   |
| NUDT3 | hsa-miR-7364-5p   |
| NUDT3 | hsa-miR-2330-3p   |
| NUDT3 | hsa-miR-548am-3p  |
| NUDT3 | hsa-miR-4716-5p   |
| NUDT3 | hsa-miR-1255-3p   |
| NUDT3 | hsa-miR-6359      |
| NUDT3 | hsa-miR-651-3p    |
| NUDT3 | hsa-miR-548aj-3p  |
| NUDT3 | hsa-miR-3916      |
| NUDT3 | hsa-miR-6381      |
| NUDT3 | hsa-miR-199b-3-5p |
| NUDT3 | hsa-miR-742-3p    |
| NUDT3 | hsa-miR-141-5p    |
| NUDT3 | hsa-miR-380-5p    |
| NUDT3 | hsa-miR-7030-5p   |
| NUDT3 | hsa-miR-7269-5p   |
| NUDT3 | hsa-miR-7053-5p   |
| NUDT3 | hsa-miR-599-5p    |
| NUDT3 | hsa-miR-1283a     |
| NUDT3 | hsa-miR-500-3p    |
| NUDT3 | hsa-miR-6736-3p   |
| NUDT3 | hsa-miR-548o-5p   |
| NUDT3 | hsa-miR-6800-3p   |
| NUDT3 | hsa-miR-6507-5p   |
| NUDT3 | hsa-miR-4768-5p   |
| NUDT3 | hsa-miR-1227-5p   |
| NUDT3 | hsa-miR-767-3p    |
| NUDT3 | hsa-miR-3918      |
| NUDT3 | hsa-miR-4724-3p   |
| NUDT3 | hsa-miR-2471-5p   |
| NUDT3 | hsa-miR-7438-5p   |
| NUDT3 | hsa-miR-7089-5p   |
| NUDT3 | hsa-miR-10        |
| NUDT3 | hsa-miR-2284x     |
| NUDT3 | hsa-miR-129b-3p   |
| NUDT3 | hsa-miR-661       |
| NUDT3 | hsa-miR-7315-5p   |
| NUDT3 | hsa-miR-5697      |
| NUDT3 | hsa-miR-224-5p    |
| NUDT3 | hsa-miR-379-5p    |
| NUDT3 | hsa-miR-7850-5p   |
| NUDT3 | hsa-miR-3157-3p   |
| NUDT3 | hsa-miR-4797-5p   |
| NUDT3 | hsa-miR-26        |

|       |                  |
|-------|------------------|
| NUDT3 | hsa-miR-7264-3p  |
| NUDT3 | hsa-miR-410      |
| NUDT3 | hsa-miR-935      |
| NUDT3 | hsa-miR-129-2-3p |
| NUDT3 | hsa-miR-365a-3p  |
| NUDT3 | hsa-miR-5627-3p  |
| NUDT3 | hsa-miR-495-5p   |
| NUDT3 | hsa-miR-7164-3p  |
| NUDT3 | hsa-miR-412      |
| NUDT3 | hsa-miR-129-3p   |
| NUDT3 | hsa-miR-6511-3p  |
| NUDT4 | hsa-miR-330-3p   |
| NUDT4 | hsa-miR-7079-5p  |
| NUDT4 | hsa-miR-548ae-3p |
| NUDT4 | hsa-miR-496.1    |
| NUDT4 | hsa-miR-6847-3p  |
| NUDT4 | hsa-miR-494      |
| NUDT4 | hsa-miR-194-5p   |
| NUDT4 | hsa-miR-1255     |
| NUDT4 | hsa-miR-201-3p   |
| NUDT4 | hsa-miR-154-5p   |
| NUDT4 | hsa-miR-19b-5p   |
| NUDT4 | hsa-miR-6841-3p  |
| NUDT4 | hsa-miR-487a-3p  |
| NUDT4 | hsa-miR-2370-5p  |
| NUDT4 | hsa-miR-2276-3p  |
| NUDT4 | hsa-miR-2054     |
| NUDT4 | hsa-miR-296-5p   |
| NUDT4 | hsa-miR-7273-5p  |
| NUDT4 | hsa-miR-7251-3p  |
| NUDT4 | hsa-miR-5617-5p  |
| NUDT4 | hsa-miR-1913     |
| NUDT4 | hsa-miR-1434-3p  |
| NUDT4 | hsa-miR-19a-5p   |
| NUDT4 | hsa-miR-4662a-3p |
| NUDT4 | hsa-miR-593-3p   |
| NUDT4 | hsa-miR-195-3p   |
| NUDT4 | hsa-miR-411-3p   |
| NUDT4 | hsa-miR-549a     |
| NUDT4 | hsa-miR-3126-5p  |
| NUDT4 | hsa-miR-200a-5p  |
| NUDT4 | hsa-miR-511-3p   |
| NUDT4 | hsa-miR-3689-3p  |
| NUDT4 | hsa-miR-18-5p    |
| NUDT4 | hsa-miR-21-5p    |
| NUDT4 | hsa-miR-211-3p   |

|       |                  |
|-------|------------------|
| NUDT4 | hsa-miR-539-3p   |
| NUDT4 | hsa-miR-4495     |
| NUDT4 | hsa-miR-497-3p   |
| NUDT4 | hsa-miR-7081-5p  |
| NUDT4 | hsa-miR-7039-5p  |
| NUDT4 | hsa-miR-4505     |
| NUDT4 | hsa-miR-878      |
| NUDT4 | hsa-miR-1262     |
| NUDT4 | hsa-miR-4510     |
| NUDT4 | hsa-miR-6529b    |
| NUDT4 | hsa-miR-4444     |
| NUDT4 | hsa-miR-7703     |
| NUDT4 | hsa-miR-221-5p   |
| NUDT4 | hsa-miR-411-5p.1 |
| NUDT4 | hsa-miR-6828-5p  |
| NUDT4 | hsa-miR-1273h-5p |
| NUDT4 | hsa-miR-4700-3p  |
| NUDT4 | hsa-miR-6315     |
| NUDT4 | hsa-miR-4725-3p  |
| NUDT4 | hsa-miR-508b     |
| NUDT4 | hsa-miR-7031-5p  |
| NUDT4 | hsa-miR-5116     |
| NUDT4 | hsa-miR-5134-5p  |
| NUDT4 | hsa-miR-130-3p   |
| NUDT4 | hsa-miR-3652     |
| NUDT4 | hsa-miR-7198-3p  |
| NUDT4 | hsa-miR-3073a-3p |
| NUDT4 | hsa-miR-16-1-3p  |
| NUDT4 | hsa-miR-4802-5p  |
| NUDT4 | hsa-miR-874-5p   |
| NUDT4 | hsa-miR-6938-3p  |
| NUDT4 | hsa-miR-148b-5p  |
| NUDT4 | hsa-miR-582-5p   |
| NUDT4 | hsa-miR-331-5p   |
| NUDT4 | hsa-miR-6910-3p  |
| NUDT4 | hsa-miR-323-3p   |
| NUDT4 | hsa-miR-548az-5p |
| NUDT4 | hsa-miR-2277-3p  |
| NUDT4 | hsa-miR-6892-5p  |
| NUDT4 | hsa-miR-5589-3p  |
| NUDT4 | hsa-miR-30c-2-3p |
| NUDT4 | hsa-miR-548ar-5p |
| NUDT4 | hsa-miR-3090-5p  |
| NUDT4 | hsa-miR-4650     |
| NUDT4 | hsa-miR-7389-3p  |
| NUDT4 | hsa-miR-548ad-5p |

|       |                  |
|-------|------------------|
| NUDT4 | hsa-miR-19-5p    |
| NUDT4 | hsa-miR-1844     |
| NUDT4 | hsa-miR-205-3p   |
| NUDT4 | hsa-miR-7398r-5p |
| NUDT4 | hsa-miR-7333-5p  |
| NUDT4 | hsa-miR-7232-3p  |
| NUDT4 | hsa-miR-4713-5p  |
| NUDT4 | hsa-miR-3057-3p  |
| NUDT4 | hsa-miR-30c-3p   |
| NUDT4 | hsa-miR-1183     |
| NUDT4 | hsa-miR-8118     |
| NUDT4 | hsa-miR-8805     |
| NUDT4 | hsa-miR-138-5p   |
| NUDT4 | hsa-miR-515-3p   |
| NUDT4 | hsa-miR-323      |
| NUDT4 | hsa-miR-6788-5p  |
| NUDT4 | hsa-miR-3548     |
| NUDT4 | hsa-miR-291-3p   |
| NUDT4 | hsa-miR-322-3p   |
| NUDT4 | hsa-miR-302a-5p  |
| NUDT4 | hsa-miR-1246     |
| NUDT4 | hsa-miR-7856-5p  |
| NUDT4 | hsa-miR-580-3p   |
| NUDT4 | hsa-miR-4664-5p  |
| NUDT4 | hsa-miR-22-5p    |
| NUDT4 | hsa-miR-3473c    |
| NUDT4 | hsa-miR-6848-5p  |
| NUDT4 | hsa-miR-200ac-5p |
| NUDT4 | hsa-miR-8059     |
| NUDT4 | hsa-miR-619      |
| NUDT4 | hsa-miR-1291     |
| NUDT4 | hsa-miR-6808-5p  |
| NUDT4 | hsa-miR-6885-3p  |
| NUDT4 | hsa-miR-2184     |
| NUDT4 | hsa-miR-5582-5p  |
| NUDT4 | hsa-miR-6896-3p  |
| NUDT4 | hsa-miR-2414     |
| NUDT4 | hsa-miR-6972-5p  |
| NUDT4 | hsa-miR-4472     |
| NUDT4 | hsa-miR-1296     |
| NUDT4 | hsa-miR-199      |
| NUDT4 | hsa-miR-33b-3p   |
| NUDT4 | hsa-miR-1188-5p  |
| NUDT4 | hsa-miR-424-5p   |
| NUDT4 | hsa-miR-7282-5p  |
| NUDT4 | hsa-miR-8905     |

|       |                  |
|-------|------------------|
| NUDT4 | hsa-miR-3113-5p  |
| NUDT4 | hsa-miR-3473f    |
| NUDT4 | hsa-miR-6391     |
| NUDT4 | hsa-miR-3112-5p  |
| NUDT4 | hsa-miR-570-3p   |
| NUDT4 | hsa-miR-5697-3p  |
| NUDT4 | hsa-miR-141-3p   |
| NUDT4 | hsa-miR-6715-3p  |
| NUDT4 | hsa-miR-6913-3p  |
| NUDT4 | hsa-miR-351-5p   |
| NUDT4 | hsa-miR-6780a-3p |
| NUDT4 | hsa-miR-7157-5p  |
| NUDT4 | hsa-miR-7395-3p  |
| NUDT4 | hsa-miR-7182-3p  |
| NUDT4 | hsa-miR-7032-3p  |
| NUDT4 | hsa-miR-105-5p   |
| NUDT4 | hsa-miR-1260a    |
| NUDT4 | hsa-miR-7019-5p  |
| NUDT4 | hsa-miR-548ap-5p |
| NUDT4 | hsa-miR-3127-3p  |
| NUDT4 | hsa-miR-92a-5p   |
| NUDT4 | hsa-miR-758-5p   |
| NUDT4 | hsa-miR-4733-5p  |
| NUDT4 | hsa-miR-7257-5p  |
| NUDT4 | hsa-miR-618      |
| NUDT4 | hsa-miR-6833-3p  |
| NUDT4 | hsa-miR-448-3p   |
| NUDT4 | hsa-miR-532-3p   |
| NUDT4 | hsa-miR-7666-3p  |
| NUDT4 | hsa-miR-636      |
| NUDT4 | hsa-miR-199-1-5p |
| NUDT4 | hsa-miR-3651     |
| NUDT4 | hsa-miR-7078-3p  |
| NUDT4 | hsa-miR-371a-5p  |
| NUDT4 | hsa-miR-2457     |
| NUDT4 | hsa-miR-549-5p   |
| NUDT4 | hsa-miR-548e-5p  |
| NUDT4 | hsa-miR-506-5p   |
| NUDT4 | hsa-miR-1972     |
| NUDT4 | hsa-miR-650      |
| NUDT4 | hsa-miR-4260     |
| NUDT4 | hsa-miR-7117-3p  |
| NUDT4 | hsa-miR-2285af   |
| NUDT4 | hsa-miR-499      |
| NUDT4 | hsa-miR-302b-5p  |
| NUDT4 | hsa-miR-376c-3p  |

|       |                  |
|-------|------------------|
| NUDT4 | hsa-miR-5692a    |
| NUDT4 | hsa-miR-455-5p   |
| NUDT4 | hsa-miR-7387-5p  |
| NUDT4 | hsa-miR-201-5p   |
| NUDT4 | hsa-miR-6528     |
| NUDT4 | hsa-miR-2361     |
| NUDT4 | hsa-miR-134-5p   |
| NUDT4 | hsa-miR-6953-3p  |
| NUDT4 | hsa-miR-491-3p   |
| NUDT4 | hsa-miR-3124-3p  |
| NUDT4 | hsa-miR-7382-5p  |
| NUDT4 | hsa-miR-98-3p    |
| NUDT4 | hsa-miR-4766-5p  |
| NUDT4 | hsa-miR-548e-3p  |
| NUDT4 | hsa-miR-7299-3p  |
| NUDT4 | hsa-miR-3119     |
| NUDT4 | hsa-miR-7199-3p  |
| NUDT4 | hsa-miR-1260b    |
| NUDT4 | hsa-miR-203      |
| NUDT4 | hsa-miR-644a     |
| NUDT4 | hsa-miR-454-3p   |
| NUDT4 | hsa-miR-4662b    |
| NUDT4 | hsa-miR-4753-5p  |
| NUDT4 | hsa-miR-5692bc   |
| NUDT4 | hsa-miR-3079-5p  |
| NUDT4 | hsa-miR-340-5p   |
| NUDT4 | hsa-miR-6130     |
| NUDT4 | hsa-miR-4742-3p  |
| NUDT4 | hsa-miR-4478     |
| NUDT4 | hsa-miR-4671-3p  |
| NUDT4 | hsa-miR-1545c-3p |
| NUDT4 | hsa-miR-9768-5p  |
| NUDT4 | hsa-miR-8886     |
| NUDT4 | hsa-miR-891-3p   |
| NUDT4 | hsa-miR-497-5p   |
| NUDT4 | hsa-miR-501-3p   |
| NUDT4 | hsa-miR-4452     |
| NUDT4 | hsa-miR-548ak    |
| NUDT4 | hsa-miR-518d-5p  |
| NUDT4 | hsa-miR-7262a-5p |
| NUDT4 | hsa-miR-2462     |
| NUDT4 | hsa-miR-7011-3p  |
| NUDT4 | hsa-miR-7029-5p  |
| NUDT4 | hsa-miR-1251-3p  |
| NUDT4 | hsa-miR-6519     |
| NUDT4 | hsa-miR-2294     |



|       |                  |
|-------|------------------|
| NUDT4 | hsa-miR-186-3p   |
| NUDT4 | hsa-miR-743b-3p  |
| NUDT4 | hsa-miR-8908-3p  |
| NUDT4 | hsa-miR-137      |
| NUDT4 | hsa-miR-7386f-3p |
| NUDT4 | hsa-miR-7270-5p  |
| NUDT4 | hsa-miR-7197-3p  |
| NUDT4 | hsa-miR-214-5p   |
| NUDT4 | hsa-miR-7227-3p  |
| NUDT4 | hsa-miR-4649-3p  |
| NUDT4 | hsa-miR-520g-5p  |
| NUDT4 | hsa-miR-126-3p.2 |
| NUDT4 | hsa-miR-6732-5p  |
| NUDT4 | hsa-miR-23       |
| NUDT4 | hsa-miR-3679-3p  |
| NUDT4 | hsa-miR-4328     |
| NUDT4 | hsa-miR-145-5p   |
| NUDT4 | hsa-miR-6074     |
| NUDT4 | hsa-miR-207      |
| NUDT4 | hsa-let-7g-3p    |
| NUDT4 | hsa-miR-6843-3p  |
| NUDT4 | hsa-miR-483-3p.2 |
| NUDT4 | hsa-miR-200a-3p  |
| NUDT4 | hsa-miR-103-2-5p |
| NUDT4 | hsa-miR-33-5p    |
| NUDT4 | hsa-miR-6769a-5p |
| NUDT4 | hsa-miR-7258-5p  |
| NUDT4 | hsa-miR-881-5p   |
| NUDT4 | hsa-miR-548a-3p  |
| NUDT4 | hsa-miR-1227-3p  |
| NUDT4 | hsa-miR-320a     |
| NUDT4 | hsa-miR-7292-5p  |
| NUDT4 | hsa-miR-7160-5p  |
| NUDT4 | hsa-miR-7202-3p  |
| NUDT4 | hsa-miR-6134     |
| NUDT4 | hsa-miR-200-3p   |
| NUDT4 | hsa-miR-6581-3p  |
| NUDT4 | hsa-miR-567      |
| NUDT4 | hsa-miR-382-5p   |
| NUDT4 | hsa-miR-6797-5p  |
| NUDT4 | hsa-miR-8810     |
| NUDT4 | hsa-miR-1545a-3p |
| NUDT4 | hsa-miR-2467-5p  |
| NUDT4 | hsa-miR-7398u-3p |
| NUDT4 | hsa-miR-4801     |
| NUDT4 | hsa-miR-7041-5p  |

|       |                  |
|-------|------------------|
| NUDT4 | hsa-miR-518-5p   |
| NUDT4 | hsa-miR-7173-3p  |
| NUDT4 | hsa-miR-7664-5p  |
| NUDT4 | hsa-miR-548t-5p  |
| NUDT4 | hsa-miR-3942-3p  |
| NUDT4 | hsa-miR-330-3p.2 |
| NUDT4 | hsa-miR-5588-5p  |
| NUDT4 | hsa-miR-8821     |
| NUDT4 | hsa-miR-5584-5p  |
| NUDT4 | hsa-miR-8906     |
| NUDT4 | hsa-miR-7-3p     |
| NUDT4 | hsa-miR-7026-5p  |
| NUDT4 | hsa-miR-616-5p   |
| NUDT4 | hsa-miR-465-5p   |
| NUDT4 | hsa-miR-203-3p.2 |
| NUDT4 | hsa-miR-4496     |
| NUDT4 | hsa-miR-2410     |
| NUDT4 | hsa-miR-4699-5p  |
| NUDT4 | hsa-miR-371b-5p  |
| NUDT4 | hsa-miR-3616-5p  |
| NUDT4 | hsa-miR-6986-3p  |
| NUDT4 | hsa-miR-224-5p   |
| NUDT4 | hsa-miR-4271     |
| NUDT4 | hsa-miR-132-3p   |
| NUDT4 | hsa-miR-1285-3p  |
| NUDT4 | hsa-miR-2681-3p  |
| NUDT4 | hsa-miR-2329-3p  |
| NUDT4 | hsa-miR-6826-3p  |
| NUDT4 | hsa-miR-4775     |
| NUDT4 | hsa-miR-2345     |
| NUDT4 | hsa-miR-6946-5p  |
| NUDT4 | hsa-miR-6825-5p  |
| NUDT4 | hsa-miR-1292-5p  |
| NUDT4 | hsa-miR-922      |
| NUDT4 | hsa-miR-7021-3p  |
| NUDT4 | hsa-miR-1-5p     |
| NUDT4 | hsa-miR-1197-5p  |
| NUDT4 | hsa-miR-546      |
| NUDT4 | hsa-miR-7359-5p  |
| NUDT4 | hsa-miR-130      |
| NUDT4 | hsa-miR-345-5p   |
| NUDT4 | hsa-miR-295-3p   |
| NUDT4 | hsa-miR-411-5p.2 |
| NUDT4 | hsa-miR-432-3p   |
| NUDT4 | hsa-miR-7164-5p  |
| NUDT4 | hsa-miR-3978     |

|       |                   |
|-------|-------------------|
| NUDT4 | hsa-miR-526b-5p   |
| NUDT4 | hsa-miR-2313-3p   |
| NUDT4 | hsa-miR-3145-5p   |
| NUDT4 | hsa-miR-6502-3p   |
| NUDT4 | hsa-miR-193-3p    |
| NUDT4 | hsa-miR-4802-3p   |
| NUDT4 | hsa-miR-6908-5p   |
| NUDT4 | hsa-miR-23b-5p    |
| NUDT4 | hsa-miR-8822      |
| NUDT4 | hsa-miR-1933-5p   |
| NUDT4 | hsa-miR-513c-3p   |
| NUDT4 | hsa-miR-6663-5p   |
| NUDT4 | hsa-miR-3913-5p   |
| NUDT4 | hsa-miR-4471      |
| NUDT4 | hsa-miR-6871-5p   |
| NUDT4 | hsa-miR-2365      |
| NUDT4 | hsa-miR-1-2-5p    |
| NUDT4 | hsa-miR-607       |
| NUDT4 | hsa-miR-6216      |
| NUDT4 | hsa-miR-7194-5p   |
| NUDT4 | hsa-miR-510-5p    |
| NUDT4 | hsa-miR-7052-5p   |
| NUDT4 | hsa-miR-4720-3p   |
| NUDT4 | hsa-miR-491-5p    |
| NUDT4 | hsa-miR-597       |
| NUDT4 | hsa-miR-4277      |
| NUDT4 | hsa-miR-1982-3p   |
| NUDT4 | hsa-miR-4524a-3p  |
| NUDT4 | hsa-miR-2444      |
| NUDT4 | hsa-miR-2367-3p   |
| NUDT4 | hsa-miR-26-5p     |
| NUDT4 | hsa-miR-516-3p    |
| NUDT4 | hsa-miR-1251-5p   |
| NUDT4 | hsa-miR-758-3p    |
| NUDT4 | hsa-miR-592-3p    |
| NUDT4 | hsa-miR-4645-5p   |
| NUDT4 | hsa-miR-6680-3p   |
| NUDT4 | hsa-miR-181-5p    |
| NUDT4 | hsa-miR-2468      |
| NUDT4 | hsa-miR-2377      |
| NUDT4 | hsa-miR-101b-3p.1 |
| NUDT4 | hsa-miR-7205-3p   |
| NUDT4 | hsa-miR-8842      |
| NUDT4 | hsa-miR-3133      |
| NUDT4 | hsa-miR-4256      |
| NUDT4 | hsa-miR-2390      |

|       |                  |
|-------|------------------|
| NUDT4 | hsa-miR-3586-5p  |
| NUDT4 | hsa-miR-32-5p    |
| NUDT4 | hsa-miR-2372     |
| NUDT4 | hsa-miR-5011-3p  |
| NUDT4 | hsa-miR-200bc    |
| NUDT4 | hsa-miR-6903-5p  |
| NUDT4 | hsa-miR-6818-3p  |
| NUDT4 | hsa-miR-190-5p   |
| NUDT4 | hsa-miR-193b-5p  |
| NUDT4 | hsa-miR-33a-3p   |
| NUDT4 | hsa-miR-8837     |
| NUDT4 | hsa-miR-214-3p   |
| NUDT4 | hsa-miR-196-3p   |
| NUDT4 | hsa-miR-29-5p    |
| NUDT4 | hsa-miR-524-3p   |
| NUDT4 | hsa-miR-147-5p   |
| NUDT4 | hsa-miR-6894-5p  |
| NUDT4 | hsa-miR-147a     |
| NUDT4 | hsa-miR-518a-5p  |
| NUDT4 | hsa-miR-5003-3p  |
| NUDT4 | hsa-miR-7062-3p  |
| NUDT4 | hsa-miR-302-3p   |
| NUDT4 | hsa-miR-3596d    |
| NUDT4 | hsa-miR-7090-5p  |
| NUDT4 | hsa-miR-8895     |
| NUDT4 | hsa-miR-7398e-3p |
| NUDT4 | hsa-miR-9-3p     |
| NUDT4 | hsa-miR-622      |
| NUDT4 | hsa-miR-653-5p   |
| NUDT4 | hsa-miR-183-5p.2 |
| NUDT4 | hsa-miR-3121-3p  |
| NUDT4 | hsa-miR-4501     |
| NUDT4 | hsa-miR-7271-3p  |
| NUDT4 | hsa-miR-4652-3p  |
| NUDT4 | hsa-miR-1388-5p  |
| NUDT4 | hsa-miR-466n-3p  |
| NUDT4 | hsa-miR-3614-5p  |
| NUDT4 | hsa-miR-5572     |
| NUDT4 | hsa-miR-15-5p    |
| NUDT4 | hsa-miR-566      |
| NUDT4 | hsa-miR-6911-5p  |
| NUDT4 | hsa-miR-744-3p   |
| NUDT4 | hsa-miR-2284aa   |
| NUDT4 | hsa-miR-8799     |
| NUDT4 | hsa-miR-378a-5p  |
| NUDT4 | hsa-miR-1295b-5p |

|       |                   |
|-------|-------------------|
| NUDT4 | hsa-miR-6857-5p   |
| NUDT4 | hsa-miR-93-3p     |
| NUDT4 | hsa-miR-7386e-3p  |
| NUDT4 | hsa-miR-1910-5p   |
| NUDT4 | hsa-miR-1-1-5p    |
| NUDT4 | hsa-miR-6948-3p   |
| NUDT4 | hsa-miR-4656      |
| NUDT4 | hsa-miR-490-5p    |
| NUDT4 | hsa-miR-1547-3p   |
| NUDT4 | hsa-miR-4639-5p   |
| NUDT4 | hsa-miR-5197-5p   |
| NUDT4 | hsa-miR-7355-5p   |
| NUDT4 | hsa-miR-137-3p    |
| NUDT4 | hsa-miR-6738-3p   |
| NUDT4 | hsa-miR-764       |
| NUDT4 | hsa-miR-92        |
| NUDT4 | hsa-miR-301-3p    |
| NUDT4 | hsa-miR-7176-3p   |
| NUDT4 | hsa-miR-7028-3p   |
| NUDT4 | hsa-miR-429-3p    |
| NUDT4 | hsa-miR-513b-5p   |
| NUDT4 | hsa-miR-8888      |
| NUDT4 | hsa-miR-3923      |
| NUDT4 | hsa-miR-125a-3p   |
| NUDT4 | hsa-miR-6772-5p   |
| NUDT4 | hsa-miR-434-3p    |
| NUDT4 | hsa-miR-31-3p     |
| NUDT4 | hsa-miR-874       |
| NUDT4 | hsa-miR-4274      |
| NUDT4 | hsa-miR-372-5p    |
| NUDT4 | hsa-miR-2486-5p   |
| NUDT4 | hsa-miR-548j-5p   |
| NUDT4 | hsa-miR-3117-5p   |
| NUDT4 | hsa-miR-4804-3p   |
| NUDT4 | hsa-miR-506-3p    |
| NUDT4 | hsa-miR-466bcp-3p |
| NUDT4 | hsa-miR-2285y     |
| NUDT4 | hsa-miR-3662      |
| NUDT4 | hsa-miR-4320      |
| NUDT4 | hsa-miR-181b-3p   |
| NUDT4 | hsa-miR-4756-3p   |
| NUDT4 | hsa-miR-514a-3p   |
| NUDT4 | hsa-miR-4762-3p   |
| NUDT4 | hsa-miR-4678      |
| NUDT4 | hsa-miR-6408      |
| NUDT4 | hsa-miR-30-3p     |

|       |                  |
|-------|------------------|
| NUDT4 | hsa-miR-548ar-3p |
| NUDT4 | hsa-miR-3611     |
| NUDT4 | hsa-miR-5118     |
| NUDT4 | hsa-miR-4786-5p  |
| NUDT4 | hsa-miR-106-3p   |
| NUDT4 | hsa-miR-200c-5p  |
| NUDT4 | hsa-miR-134      |
| NUDT4 | hsa-miR-448      |
| NUDT4 | hsa-miR-25-3p    |
| NUDT4 | hsa-miR-4676-5p  |
| NUDT4 | hsa-miR-4778-5p  |
| NUDT4 | hsa-miR-6778-5p  |
| NUDT4 | hsa-miR-7266-5p  |
| NUDT4 | hsa-miR-6959-5p  |
| NUDT4 | hsa-miR-129-5p   |
| NUDT4 | hsa-miR-4743-3p  |
| NUDT4 | hsa-miR-712-5p   |
| NUDT4 | hsa-miR-2188-3p  |
| NUDT4 | hsa-miR-211-5p   |
| NUDT4 | hsa-miR-7246-3p  |
| NUDT4 | hsa-miR-2052     |
| NUDT4 | hsa-miR-3135a    |
| NUDT4 | hsa-miR-609      |
| NUDT4 | hsa-miR-1283     |
| NUDT4 | hsa-miR-1912-3p  |
| NUDT4 | hsa-miR-7070-5p  |
| NUDT4 | hsa-miR-758-3p   |
| NUDT4 | hsa-miR-34-5p    |
| NUDT4 | hsa-miR-221-3p   |
| NUDT4 | hsa-miR-6529a    |
| NUDT4 | hsa-miR-2284g    |
| NUDT4 | hsa-miR-4265     |
| NUDT4 | hsa-miR-467eh-5p |
| NUDT4 | hsa-miR-4521     |
| NUDT4 | hsa-miR-1968-5p  |
| NUDT4 | hsa-miR-488-3p   |
| NUDT4 | hsa-miR-872-5p   |
| NUDT4 | hsa-miR-5001-3p  |
| NUDT4 | hsa-miR-17-3p    |
| NUDT4 | hsa-miR-141-3p   |
| NUDT4 | hsa-miR-3660     |
| NUDT4 | hsa-miR-7020-5p  |
| NUDT4 | hsa-miR-541-5p   |
| NUDT4 | hsa-miR-4432     |
| NUDT4 | hsa-miR-5571-5p  |
| NUDT4 | hsa-miR-7324-3p  |

|       |                   |
|-------|-------------------|
| NUDT4 | hsa-miR-1953      |
| NUDT4 | hsa-miR-491-5p    |
| NUDT4 | hsa-miR-324-3p    |
| NUDT4 | hsa-miR-23-3p     |
| NUDT4 | hsa-miR-300-5p    |
| NUDT4 | hsa-miR-6684-5p   |
| NUDT4 | hsa-miR-4762-5p   |
| NUDT4 | hsa-miR-6934-5p   |
| NUDT4 | hsa-miR-223-5p    |
| NUDT4 | hsa-miR-706       |
| NUDT4 | hsa-miR-421-5p    |
| NUDT4 | hsa-miR-7385d-3p  |
| NUDT4 | hsa-miR-376a-2-5p |
| NUDT4 | hsa-miR-7265-5p   |
| NUDT4 | hsa-miR-6769b-3p  |
| NUDT4 | hsa-miR-548w      |
| NUDT4 | hsa-miR-1207      |
| NUDT4 | hsa-miR-7338-5p   |
| NUDT4 | hsa-miR-7380-3p   |
| NUDT4 | hsa-miR-4278      |
| NUDT4 | hsa-miR-2381      |
| NUDT4 | hsa-miR-664       |
| NUDT4 | hsa-miR-375       |
| NUDT4 | hsa-miR-3096-5p   |
| NUDT4 | hsa-miR-4422      |
| NUDT4 | hsa-miR-379-3p    |
| NUDT4 | hsa-miR-3174      |
| NUDT4 | hsa-miR-2284y     |
| NUDT4 | hsa-miR-4446      |
| NUDT4 | hsa-miR-344b-3p   |
| NUDT4 | hsa-miR-518g-3p   |
| NUDT4 | hsa-miR-7246-5p   |
| NUDT4 | hsa-miR-4494      |
| NUDT4 | hsa-miR-3688-5p   |
| NUDT4 | hsa-miR-578       |
| NUDT4 | hsa-miR-206       |
| NUDT4 | hsa-miR-6794-3p   |
| NUDT4 | hsa-miR-107       |
| NUDT4 | hsa-miR-4654      |
| NUDT4 | hsa-miR-3093-3p   |
| NUDT4 | hsa-miR-7307-5p   |
| NUDT4 | hsa-miR-669       |
| NUDT4 | hsa-miR-6984-5p   |
| NUDT4 | hsa-miR-2351      |
| NUDT4 | hsa-miR-678       |
| NUDT4 | hsa-miR-7245-5p   |

|       |                  |
|-------|------------------|
| NUDT4 | hsa-miR-3116     |
| NUDT4 | hsa-miR-6965-5p  |
| NUDT4 | hsa-miR-142-3p.2 |
| NUDT4 | hsa-miR-6883-5p  |
| NUDT4 | hsa-miR-6728-3p  |
| NUDT4 | hsa-miR-7168-5p  |
| NUDT4 | hsa-miR-4499     |
| NUDT4 | hsa-miR-3562     |
| NUDT4 | hsa-miR-742-5p   |
| NUDT4 | hsa-miR-1894-5p  |
| NUDT4 | hsa-miR-4677-5p  |
| NUDT4 | hsa-miR-6833-5p  |
| NUDT4 | hsa-miR-3156-5p  |
| NUDT4 | hsa-miR-204-5p   |
| NUDT4 | hsa-miR-3607-5p  |
| NUDT4 | hsa-miR-22-3p    |
| NUDT4 | hsa-miR-539-5p   |
| NUDT4 | hsa-miR-6981-3p  |
| NUDT4 | hsa-miR-6874-3p  |
| NUDT4 | hsa-miR-548n     |
| NUDT4 | hsa-miR-6417     |
| NUDT4 | hsa-miR-4787-5p  |
| NUDT4 | hsa-miR-548av-5p |
| NUDT4 | hsa-miR-4728-5p  |
| NUDT4 | hsa-miR-4785     |
| NUDT4 | hsa-miR-881-3p   |
| NUDT4 | hsa-miR-5622-3p  |
| NUDT4 | hsa-miR-6129     |
| NUDT4 | hsa-miR-93-5p    |
| NUDT4 | hsa-miR-500b-3p  |
| NUDT4 | hsa-miR-6864-3p  |
| NUDT4 | hsa-miR-1931     |
| NUDT4 | hsa-miR-409-3p   |
| NUDT4 | hsa-miR-6810-5p  |
| NUDT4 | hsa-miR-1981-5p  |
| NUDT4 | hsa-miR-495-3p   |
| NUDT4 | hsa-miR-647      |
| NUDT4 | hsa-miR-486-5p   |
| NUDT4 | hsa-miR-1179     |
| NUDT4 | hsa-miR-6931-5p  |
| NUDT4 | hsa-miR-139-5p   |
| NUDT4 | hsa-miR-5581-3p  |
| NUDT4 | hsa-miR-326-5p   |
| NUDT4 | hsa-miR-7007-5p  |
| NUDT4 | hsa-miR-199-3p   |
| NUDT4 | hsa-miR-200c-3p  |



|       |                  |
|-------|------------------|
| NUDT4 | hsa-miR-504      |
| NUDT4 | hsa-miR-378      |
| NUDT4 | hsa-miR-4284     |
| NUDT4 | hsa-miR-655      |
| NUDT4 | hsa-miR-6387     |
| NUDT4 | hsa-miR-1292-5p  |
| NUDT4 | hsa-miR-3656     |
| NUDT4 | hsa-miR-2363     |
| NUDT4 | hsa-miR-183-5p   |
| NUDT4 | hsa-miR-7398b-3p |
| NUDT4 | hsa-miR-2398     |
| NUDT4 | hsa-miR-1284     |
| NUDT4 | hsa-miR-1892     |
| NUDT4 | hsa-miR-7340-5p  |
| NUDT4 | hsa-miR-7a-1-3p  |
| NUDT4 | hsa-miR-151-3p   |
| NUDT4 | hsa-miR-4493     |
| NUDT4 | hsa-miR-6971-5p  |
| NUDT4 | hsa-miR-766-3p   |
| NUDT4 | hsa-miR-500a-5p  |
| NUDT4 | hsa-miR-548as-5p |
| NUDT4 | hsa-miR-550-5p   |
| NUDT4 | hsa-miR-7184-5p  |
| NUDT4 | hsa-miR-532-5p   |
| NUDT4 | hsa-miR-684      |
| NUDT4 | hsa-miR-7662-5p  |
| NUDT4 | hsa-miR-2291     |
| NUDT4 | hsa-miR-505-3p   |
| NUDT4 | hsa-miR-548aw    |
| NUDT4 | hsa-miR-6883-3p  |
| NUDT4 | hsa-miR-7398t-3p |
| NUDT4 | hsa-miR-373-5p   |
| NUDT4 | hsa-miR-655-3p   |
| NUDT4 | hsa-miR-7043-5p  |
| NUDT4 | hsa-miR-496.2    |
| NUDT4 | hsa-miR-7302-5p  |
| NUDT4 | hsa-miR-759      |
| NUDT4 | hsa-miR-142-3p   |
| NUDT4 | hsa-miR-7013-3p  |
| NUDT4 | hsa-miR-8902     |
| NUDT4 | hsa-miR-410-3p   |
| NUDT4 | hsa-miR-455-3p.1 |
| NUDT4 | hsa-miR-4272     |
| NUDT4 | hsa-miR-6912-5p  |
| NUDT4 | hsa-miR-3078-3p  |
| NUDT4 | hsa-miR-6511-5p  |

|       |                  |
|-------|------------------|
| NUDT4 | hsa-miR-5124a    |
| NUDT4 | hsa-miR-3573-3p  |
| NUDT4 | hsa-miR-6842-5p  |
| NUDT4 | hsa-miR-381-3p   |
| NUDT4 | hsa-miR-6981-5p  |
| NUDT4 | hsa-miR-548aq-3p |
| NUDT4 | hsa-miR-7383-3p  |
| NUDT4 | hsa-miR-6991-5p  |
| NUDT4 | hsa-miR-7377-5p  |
| NUDT4 | hsa-miR-450b     |
| NUDT4 | hsa-miR-202-3p   |
| NUDT4 | hsa-miR-2464-3p  |
| NUDT4 | hsa-miR-3600     |
| NUDT4 | hsa-miR-298-3p   |
| NUDT4 | hsa-miR-1256     |
| NUDT4 | hsa-miR-2284f    |
| NUDT4 | hsa-miR-6964-5p  |
| NUDT4 | hsa-miR-6860     |
| NUDT4 | hsa-miR-4275     |
| NUDT4 | hsa-miR-2373-5p  |
| NUDT4 | hsa-miR-743a-3p  |
| NUDT4 | hsa-miR-2466-3p  |
| NUDT4 | hsa-miR-7665-5p  |
| NUDT4 | hsa-miR-144-3p   |
| NUDT4 | hsa-miR-215-3p   |
| NUDT4 | hsa-miR-330-3p   |
| NUDT4 | hsa-miR-4290     |
| NUDT4 | hsa-miR-3085-5p  |
| NUDT4 | hsa-miR-8838     |
| NUDT4 | hsa-miR-8901     |
| NUDT4 | hsa-miR-3085-3p  |
| NUDT4 | hsa-miR-770-5p   |
| NUDT4 | hsa-miR-300      |
| NUDT4 | hsa-miR-4795-3p  |
| NUDT4 | hsa-miR-202-3p   |
| NUDT4 | hsa-miR-335-5p   |
| NUDT4 | hsa-miR-6723-5p  |
| NUDT4 | hsa-miR-597-5p   |
| NUDT4 | hsa-miR-1662     |
| NUDT4 | hsa-miR-1233-5p  |
| NUDT4 | hsa-miR-4693-5p  |
| NUDT4 | hsa-miR-8809     |
| NUDT4 | hsa-miR-7078-5p  |
| NUDT4 | hsa-miR-2307     |
| NUDT4 | hsa-miR-871-5p   |
| NUDT4 | hsa-miR-6877-3p  |

|       |                   |
|-------|-------------------|
| NUDT4 | hsa-miR-351-3p    |
| NUDT4 | hsa-miR-301       |
| NUDT4 | hsa-miR-3180-3p   |
| NUDT4 | hsa-miR-670-3p    |
| NUDT4 | hsa-miR-6388      |
| NUDT4 | hsa-miR-466mo-3p  |
| NUDT4 | hsa-miR-122       |
| NUDT4 | hsa-miR-2439-5p   |
| NUDT4 | hsa-miR-4777-3p   |
| NUDT4 | hsa-miR-8908e     |
| NUDT4 | hsa-miR-5000-5p   |
| NUDT4 | hsa-miR-8843      |
| NUDT4 | hsa-miR-219a-1-3p |
| NUDT4 | hsa-miR-1254      |
| NUDT4 | hsa-miR-3612      |
| NUDT4 | hsa-miR-30ad-3p   |
| NUDT4 | hsa-miR-7018-3p   |
| NUDT4 | hsa-miR-4766-3p   |
| NUDT4 | hsa-miR-1299      |
| NUDT4 | hsa-miR-195-5p    |
| NUDT4 | hsa-miR-7189-3p   |
| NUDT4 | hsa-miR-219a-5p   |
| NUDT4 | hsa-miR-2422      |
| NUDT4 | hsa-miR-374       |
| NUDT4 | hsa-miR-4744      |
| NUDT4 | hsa-miR-362-3p    |
| NUDT4 | hsa-miR-218-5p    |
| NUDT4 | hsa-miR-455-3p    |
| NUDT4 | hsa-miR-7160-3p   |
| NUDT4 | hsa-miR-4750-3p   |
| NUDT4 | hsa-miR-1250-3p   |
| NUDT4 | hsa-miR-6744-5p   |
| NUDT4 | hsa-miR-103       |
| NUDT4 | hsa-miR-7332-5p   |
| NUDT4 | hsa-miR-6416-3p   |
| NUDT4 | hsa-miR-1343-5p   |
| NUDT4 | hsa-miR-875-3p    |
| NUDT4 | hsa-miR-496a-3p.1 |
| NUDT4 | hsa-miR-1206      |
| NUDT4 | hsa-miR-1275      |
| NUDT4 | hsa-miR-31-5p     |
| NUDT4 | hsa-miR-6541      |
| NUDT4 | hsa-miR-6133      |
| NUDT4 | hsa-miR-6899-3p   |
| NUDT4 | hsa-miR-155-5p    |
| NUDT4 | hsa-miR-1938      |

|       |                   |
|-------|-------------------|
| NUDT4 | hsa-miR-520c-3p   |
| NUDT4 | hsa-miR-5128      |
| NUDT4 | hsa-miR-2485      |
| NUDT4 | hsa-miR-9-5p      |
| NUDT4 | hsa-miR-1838      |
| NUDT4 | hsa-miR-411a      |
| NUDT4 | hsa-miR-655-5p    |
| NUDT4 | hsa-miR-4668-3p   |
| NUDT4 | hsa-miR-8074      |
| NUDT4 | hsa-miR-1906      |
| NUDT4 | hsa-miR-2298      |
| NUDT4 | hsa-miR-8085      |
| NUDT4 | hsa-miR-1252-3p   |
| NUDT4 | hsa-miR-6796-5p   |
| NUDT4 | hsa-miR-7235-5p   |
| NUDT4 | hsa-miR-2284q     |
| NUDT4 | hsa-miR-3156-3p   |
| NUDT4 | hsa-miR-1193-5p   |
| NUDT4 | hsa-miR-3714      |
| NUDT4 | hsa-miR-6719-3p   |
| NUDT4 | hsa-miR-4302      |
| NUDT4 | hsa-miR-766-3p    |
| NUDT4 | hsa-miR-380-3p    |
| NUDT4 | hsa-miR-3076-5p   |
| NUDT4 | hsa-miR-196c-3p   |
| NUDT4 | hsa-miR-514a-3p   |
| NUDT4 | hsa-miR-363-5p    |
| NUDT4 | hsa-miR-8067      |
| NUDT4 | hsa-miR-3120-3p   |
| NUDT4 | hsa-miR-467-3p    |
| NUDT4 | hsa-miR-4461      |
| NUDT4 | hsa-miR-8066      |
| NUDT4 | hsa-miR-1224      |
| NUDT4 | hsa-miR-6917-3p   |
| NUDT4 | hsa-miR-3934-5p   |
| NUDT4 | hsa-miR-466b-4-3p |
| NUDT4 | hsa-miR-2895      |
| NUDT4 | hsa-miR-874-3p    |
| NUDT4 | hsa-miR-7173-5p   |
| NUDT4 | hsa-miR-376a-1-5p |
| NUDT4 | hsa-miR-7150      |
| NUDT4 | hsa-miR-939-5p    |
| NUDT4 | hsa-miR-3151      |
| NUDT4 | hsa-miR-1827      |
| NUDT4 | hsa-miR-3622b-5p  |
| NUDT4 | hsa-miR-6960-5p   |

|       |                  |
|-------|------------------|
| NUDT4 | hsa-miR-2399-5p  |
| NUDT4 | hsa-miR-4291     |
| NUDT4 | hsa-miR-8070     |
| NUDT4 | hsa-miR-8862     |
| NUDT4 | hsa-miR-3606-3p  |
| NUDT4 | hsa-miR-4430     |
| NUDT4 | hsa-miR-7006-3p  |
| NUDT4 | hsa-miR-101-3p   |
| NUDT4 | hsa-miR-5087     |
| NUDT4 | hsa-miR-7093-3p  |
| NUDT4 | hsa-miR-516      |
| NUDT4 | hsa-miR-6944-3p  |
| NUDT4 | hsa-miR-7168-3p  |
| NUDT4 | hsa-miR-3060-3p  |
| NUDT4 | hsa-miR-4423     |
| NUDT4 | hsa-miR-296-5p   |
| NUDT4 | hsa-miR-4477b    |
| NUDT4 | hsa-miR-6906-5p  |
| NUDT4 | hsa-miR-132-3p   |
| NUDT4 | hsa-let-7f-2-3p  |
| NUDT4 | hsa-miR-222-3p   |
| NUDT4 | hsa-miR-204-5p   |
| NUDT4 | hsa-miR-612      |
| NUDT4 | hsa-miR-2461-5p  |
| NUDT4 | hsa-miR-4728-3p  |
| NUDT4 | hsa-miR-3919     |
| NUDT4 | hsa-miR-3151-5p  |
| NUDT4 | hsa-miR-7328-3p  |
| NUDT4 | hsa-miR-29a-1-5p |
| NUDT4 | hsa-miR-496      |
| NUDT4 | hsa-miR-2326     |
| NUDT4 | hsa-miR-5120     |
| NUDT4 | hsa-miR-3065-5p  |
| NUDT4 | hsa-miR-373-3p   |
| NUDT4 | hsa-miR-4424     |
| NUDT4 | hsa-miR-1681     |
| NUDT4 | hsa-miR-3475-3p  |
| NUDT4 | hsa-miR-146a-3p  |
| NUDT4 | hsa-miR-18a-3p   |
| NUDT4 | hsa-miR-9-5p     |
| NUDT4 | hsa-miR-6952-5p  |
| NUDT4 | hsa-miR-548      |
| NUDT4 | hsa-miR-449-5p   |
| NUDT4 | hsa-miR-3121-5p  |
| NUDT4 | hsa-miR-2116-3p  |
| NUDT4 | hsa-miR-6976-3p  |

|       |                   |
|-------|-------------------|
| NUDT4 | hsa-miR-203-3p.1  |
| NUDT4 | hsa-miR-135a-1-3p |
| NUDT4 | hsa-miR-330-3p.1  |
| NUDT4 | hsa-miR-702-5p    |
| NUDT4 | hsa-miR-487-3p    |
| NUDT4 | hsa-miR-683       |
| NUDT4 | hsa-miR-3671      |
| NUDT4 | hsa-miR-503-5p    |
| NUDT4 | hsa-miR-197-3p    |
| NUDT4 | hsa-miR-6756-5p   |
| NUDT4 | hsa-miR-661       |
| NUDT4 | hsa-miR-7660-3p   |
| NUDT4 | hsa-miR-5699-3p   |
| NUDT4 | hsa-miR-1249-5p   |
| NUDT4 | hsa-miR-149-3p    |
| NUDT4 | hsa-miR-7316-5p   |
| NUDT4 | hsa-miR-583       |
| NUDT4 | hsa-miR-378j      |
| NUDT4 | hsa-miR-1247-3p   |
| NUDT4 | hsa-miR-8890      |
| NUDT4 | hsa-miR-570-5p    |
| NUDT4 | hsa-miR-7045-3p   |
| NUDT4 | hsa-miR-365-3p    |
| NUDT4 | hsa-miR-4714-3p   |
| NUDT4 | hsa-miR-7194-3p   |
| NUDT4 | hsa-miR-21-3p     |
| NUDT4 | hsa-miR-2448-3p   |
| NUDT4 | hsa-miR-876       |
| NUDT4 | hsa-miR-5186      |
| NUDT4 | hsa-miR-891a-3p   |
| NUDT4 | hsa-miR-6123      |
| NUDT4 | hsa-miR-4519      |
| NUDT4 | hsa-miR-7256-3p   |
| NUDT4 | hsa-miR-7394b-5p  |
| NUDT4 | hsa-miR-2475      |
| NUDT4 | hsa-miR-4666b     |
| NUDT4 | hsa-miR-3976      |
| NUDT4 | hsa-miR-5189-5p   |
| NUDT4 | hsa-miR-3937      |
| NUDT4 | hsa-miR-7398s-5p  |
| NUDT4 | hsa-miR-1185-3p   |
| NUDT4 | hsa-miR-7275-5p   |
| NUDT4 | hsa-miR-4709-5p   |
| NUDT4 | hsa-miR-4506      |
| NUDT4 | hsa-miR-1983      |
| NUDT4 | hsa-miR-7326-5p   |

|       |                   |
|-------|-------------------|
| NUDT4 | hsa-miR-219b-3p   |
| NUDT4 | hsa-miR-890-5p    |
| NUDT4 | hsa-miR-1296-5p   |
| NUDT4 | hsa-miR-122-5p    |
| NUDT4 | hsa-let-7a-2-3p   |
| NUDT4 | hsa-miR-1964-5p   |
| NUDT4 | hsa-miR-490-3p    |
| NUDT4 | hsa-miR-545-3p    |
| NUDT4 | hsa-miR-2897      |
| NUDT4 | hsa-miR-6855-5p   |
| NUDT4 | hsa-miR-8826      |
| NUDT4 | hsa-miR-4727-3p   |
| NUDT4 | hsa-miR-6718-5p   |
| NUDT4 | hsa-miR-216b-3p   |
| NUDT4 | hsa-miR-150-5p    |
| NUDT4 | hsa-miR-376c      |
| NUDT4 | hsa-miR-548g-3p   |
| NUDT4 | hsa-miR-5689      |
| NUDT4 | hsa-miR-500-5p    |
| NUDT4 | hsa-miR-222-3p    |
| NUDT4 | hsa-miR-6846-5p   |
| NUDT4 | hsa-miR-548ah-3p  |
| NUDT4 | hsa-miR-425-5p    |
| NUDT4 | hsa-miR-2380      |
| NUDT4 | hsa-miR-7861      |
| NUDT4 | hsa-miR-185-5p    |
| NUDT4 | hsa-miR-1825      |
| NUDT4 | hsa-miR-7352-3p   |
| NUDT4 | hsa-miR-15        |
| NUDT4 | hsa-miR-7297-5p   |
| NUDT4 | hsa-miR-185-5p    |
| NUDT4 | hsa-miR-7248-5p   |
| NUDT4 | hsa-miR-6951-3p   |
| NUDT4 | hsa-miR-2319      |
| NUDT4 | hsa-miR-4447      |
| NUDT4 | hsa-miR-6127      |
| NUDT4 | hsa-miR-344i      |
| NUDT4 | hsa-miR-515       |
| NUDT4 | hsa-miR-6922-3p   |
| NUDT4 | hsa-miR-3672      |
| NUDT4 | hsa-miR-218a-2-3p |
| NUDT4 | hsa-miR-382-5p    |
| NUDT4 | hsa-miR-423-5p    |
| NUDT4 | hsa-miR-573       |
| NUDT4 | hsa-miR-7374a-3p  |
| NUDT4 | hsa-miR-7024-5p   |

|       |                   |
|-------|-------------------|
| NUDT4 | hsa-miR-2349      |
| NUDT4 | hsa-miR-7461-3p   |
| NUDT4 | hsa-miR-7277-5p   |
| NUDT4 | hsa-miR-5681a     |
| NUDT4 | hsa-miR-575       |
| NUDT4 | hsa-miR-4297      |
| NUDT4 | hsa-miR-658       |
| NUDT4 | hsa-miR-516b      |
| NUDT4 | hsa-miR-519e-3p   |
| NUDT4 | hsa-miR-6762-5p   |
| NUDT4 | hsa-miR-1285-5p   |
| NUDT4 | hsa-miR-433-5p    |
| NUDT4 | hsa-miR-6876-5p   |
| NUDT4 | hsa-miR-7317-3p   |
| NUDT4 | hsa-miR-2469      |
| NUDT4 | hsa-miR-511-5p    |
| NUDT4 | hsa-miR-4677-3p   |
| NUDT4 | hsa-miR-4746-3p   |
| NUDT4 | hsa-miR-3110-5p   |
| NUDT4 | hsa-miR-3574      |
| NUDT4 | hsa-miR-7047-5p   |
| NUDT4 | hsa-miR-2452      |
| NUDT4 | hsa-miR-592       |
| NUDT4 | hsa-miR-3973      |
| NUDT4 | hsa-miR-7b-3p     |
| NUDT4 | hsa-miR-7279-3p   |
| NUDT4 | hsa-miR-6819-3p   |
| NUDT4 | hsa-miR-124-3p.2  |
| NUDT4 | hsa-miR-4426      |
| NUDT4 | hsa-miR-548cej-3p |
| NUDT4 | hsa-miR-433       |
| NUDT4 | hsa-miR-6742-3p   |
| NUDT4 | hsa-miR-4446-5p   |
| NUDT4 | hsa-miR-6811-3p   |
| NUDT4 | hsa-miR-133b-5p   |
| NUDT4 | hsa-miR-16-3p     |
| NUDT4 | hsa-miR-7673-3p   |
| NUDT4 | hsa-miR-4735-5p   |
| NUDT4 | hsa-miR-3551-5p   |
| NUDT4 | hsa-miR-944       |
| NUDT4 | hsa-miR-6923-5p   |
| NUDT4 | hsa-miR-5616-3p   |
| NUDT4 | hsa-miR-1288-3p   |
| NUDT4 | hsa-miR-1207-3p   |
| NUDT4 | hsa-miR-707       |
| NUDT4 | hsa-miR-608       |



|       |                 |
|-------|-----------------|
| NUDT4 | hsa-miR-219b-5p |
| NUDT4 | hsa-miR-548k    |
| NUDT4 | hsa-miR-1950    |
| NUDT4 | hsa-miR-3087-3p |
| NUDT4 | hsa-miR-1947-5p |
| NUDT4 | hsa-miR-148-5p  |
| NUDT4 | hsa-miR-6881-5p |
| NUDT4 | hsa-miR-466l-3p |
| NUDT4 | hsa-miR-340-3p  |
| NUDT4 | hsa-miR-470-5p  |
| NUDT4 | hsa-miR-1273f   |
| NUDT4 | hsa-miR-544a    |
| NUDT4 | hsa-miR-3128    |
| NUDT4 | hsa-miR-1276    |
| NUDT4 | hsa-miR-7369-3p |
| NUDT4 | hsa-let-7a-3p   |
| NUDT4 | hsa-miR-4648    |
| NUDT4 | hsa-miR-135-5p  |
| NUDT4 | hsa-miR-6401    |
| NUDT4 | hsa-miR-3106-3p |
| NUDT4 | hsa-miR-4796-5p |
| NUDT4 | hsa-miR-3675-3p |
| NUDT4 | hsa-miR-4789-5p |
| NUDT4 | hsa-miR-4502    |
| NUDT4 | hsa-miR-133     |
| NUDT4 | hsa-miR-6794-5p |
| NUDT4 | hsa-miR-106     |
| NUDT4 | hsa-miR-140-5p  |
| NUDT4 | hsa-miR-651-5p  |
| NUDT4 | hsa-miR-7166-3p |
| NUDT4 | hsa-miR-8072    |
| NUDT4 | hsa-miR-664a-3p |
| NUDT4 | hsa-miR-153-3p  |
| NUDT4 | hsa-miR-4782-5p |
| NUDT4 | hsa-miR-125-5p  |
| NUDT4 | hsa-miR-3123    |
| NUDT4 | hsa-miR-103-3p  |
| NUDT4 | hsa-miR-200c-3p |
| NUDT4 | hsa-miR-6747-5p |
| NUDT4 | hsa-miR-7350-5p |
| NUDT4 | hsa-miR-1230    |
| NUDT4 | hsa-miR-4293    |
| NUDT4 | hsa-miR-4777-5p |
| NUDT4 | hsa-miR-7335-3p |
| NUDT4 | hsa-miR-7354-3p |
| NUDT4 | hsa-miR-2461-3p |

|       |                  |
|-------|------------------|
| NUDT4 | hsa-miR-3667-5p  |
| NUDT4 | hsa-miR-456-5p   |
| NUDT4 | hsa-miR-548b-5p  |
| NUDT4 | hsa-miR-4475     |
| NUDT4 | hsa-miR-2479     |
| NUDT4 | hsa-miR-6867-3p  |
| NUDT4 | hsa-miR-374c-3p  |
| NUDT4 | hsa-miR-7028-5p  |
| NUDT4 | hsa-miR-485-5p   |
| NUDT4 | hsa-miR-7396-5p  |
| NUDT4 | hsa-miR-2284b    |
| NUDT4 | hsa-miR-324      |
| NUDT4 | hsa-miR-30b-3p   |
| NUDT4 | hsa-miR-5099     |
| NUDT4 | hsa-miR-556-5p   |
| NUDT4 | hsa-miR-3150a-3p |
| NUDT4 | hsa-miR-6961-3p  |
| NUDT4 | hsa-miR-105b     |
| NUDT4 | hsa-miR-6830-3p  |
| NUDT4 | hsa-miR-642-3p   |
| NUDT4 | hsa-miR-6776-5p  |
| NUDT4 | hsa-miR-591      |
| NUDT4 | hsa-miR-4799-3p  |
| NUDT4 | hsa-miR-548c-3p  |
| NUDT4 | hsa-miR-6878-5p  |
| NUDT4 | hsa-miR-4253     |
| NUDT4 | hsa-miR-3200-5p  |
| NUDT4 | hsa-miR-8084     |
| NUDT4 | hsa-miR-7235-3p  |
| NUDT4 | hsa-miR-632      |
| NUDT4 | hsa-let-7-3p     |
| NUDT4 | hsa-miR-8054     |
| NUDT4 | hsa-miR-6819-5p  |
| NUDT4 | hsa-miR-125      |
| NUDT4 | hsa-miR-7203-5p  |
| NUDT4 | hsa-miR-134-3p   |
| NUDT4 | hsa-miR-6414     |
| NUDT4 | hsa-miR-7327-5p  |
| NUDT4 | hsa-miR-3646     |
| NUDT4 | hsa-miR-4711-5p  |
| NUDT4 | hsa-miR-10-5p    |
| NUDT4 | hsa-miR-2285z    |
| NUDT4 | hsa-miR-519-3p   |
| NUDT4 | hsa-miR-887      |
| NUDT4 | hsa-miR-205-5p   |
| NUDT4 | hsa-miR-186-5p   |

|       |                    |
|-------|--------------------|
| NUDT4 | hsa-miR-513a-3p    |
| NUDT4 | hsa-miR-411-5p     |
| NUDT4 | hsa-miR-218-5p     |
| NUDT4 | hsa-miR-6355       |
| NUDT4 | hsa-miR-6508-5p    |
| NUDT4 | hsa-miR-548aq-5p   |
| NUDT4 | hsa-miR-552-5p     |
| NUDT4 | hsa-miR-6720-5p    |
| NUDT4 | hsa-miR-25-5p      |
| NUDT4 | hsa-miR-128        |
| NUDT4 | hsa-miR-146-5p     |
| NUDT4 | hsa-miR-383-3p     |
| NUDT4 | hsa-miR-8083       |
| NUDT4 | hsa-miR-4504       |
| NUDT4 | hsa-miR-22-3p      |
| NUDT4 | hsa-miR-450a       |
| NUDT4 | hsa-miR-7244-3p    |
| NUDT4 | hsa-miR-126-5p     |
| NUDT4 | hsa-miR-7977       |
| NUDT4 | hsa-miR-669aflp-5p |
| NUDT4 | hsa-miR-2311       |
| NUDT4 | hsa-miR-1544-5p    |
| NUDT4 | hsa-miR-7073-5p    |
| NUDT4 | hsa-miR-7289-3p    |
| NUDT4 | hsa-miR-2285b      |
| NUDT4 | hsa-miR-7200-5p    |
| NUDT4 | hsa-miR-4420       |
| NUDT4 | hsa-miR-6080       |
| NUDT4 | hsa-miR-1205       |
| NUDT4 | hsa-miR-3075-3p    |
| NUDT4 | hsa-miR-7154-3p    |
| NUDT4 | hsa-miR-6771-5p    |
| NUDT4 | hsa-miR-298        |
| NUDT4 | hsa-miR-574-3p     |
| NUDT4 | hsa-miR-606        |
| NUDT4 | hsa-miR-450b-5p    |
| NUDT4 | hsa-miR-8892       |
| NUDT4 | hsa-miR-208-5p     |
| NUDT4 | hsa-miR-7341-5p    |
| NUDT4 | hsa-miR-571        |
| NUDT4 | hsa-miR-17-5p      |
| NUDT4 | hsa-miR-5588-3p    |
| NUDT4 | hsa-miR-379-5p     |
| NUDT4 | hsa-miR-96-5p      |
| NUDT4 | hsa-miR-190-3p     |
| NUDT4 | hsa-miR-3064-5p    |

|       |                 |
|-------|-----------------|
| NUDT4 | hsa-miR-4307    |
| NUDT4 | hsa-miR-495-3p  |
| NUDT4 | hsa-miR-873-3p  |
| NUDT4 | hsa-miR-3146    |
| NUDT4 | hsa-miR-6842-3p |
| NUDT4 | hsa-miR-7119-5p |
| NUDT4 | hsa-miR-7116-3p |
| NUDT4 | hsa-miR-561-3p  |
| NUDT4 | hsa-miR-1260a   |
| NUDT4 | hsa-miR-4698    |
| NUDT4 | hsa-miR-6906-3p |
| NUDT4 | hsa-miR-1194    |
| NUDT4 | hsa-miR-135a-5p |
| NUDT4 | hsa-miR-890     |
| NUDT4 | hsa-miR-5114    |
| NUDT4 | hsa-miR-8904b   |
| NUDT4 | hsa-miR-671-5p  |
| NUDT4 | hsa-miR-6949-5p |
| NUDT4 | hsa-miR-6331    |
| NUDT4 | hsa-let-7c-3p   |
| NUDT4 | hsa-miR-3101-3p |
| NUDT4 | hsa-miR-8807    |
| NUDT4 | hsa-miR-6513-3p |
| NUDT4 | hsa-miR-6344    |
| NUDT4 | hsa-miR-3082-5p |
| NUDT4 | hsa-miR-320b    |
| NUDT4 | hsa-miR-3577-5p |
| NUDT4 | hsa-miR-191-5p  |
| NUDT4 | hsa-miR-1227-3p |
| NUDT4 | hsa-miR-7059-3p |
| NUDT4 | hsa-miR-499b-3p |
| NUDT4 | hsa-miR-506-3p  |
| NUDT4 | hsa-miR-6815-5p |
| NUDT4 | hsa-miR-4421    |
| NUDT4 | hsa-miR-488-3p  |
| NUDT4 | hsa-miR-7274-5p |
| NUDT4 | hsa-miR-6988-3p |
| NUDT4 | hsa-miR-6756-3p |
| NUDT4 | hsa-miR-4455    |
| NUDT4 | hsa-miR-7051-3p |
| NUDT4 | hsa-miR-3670    |
| NUDT4 | hsa-miR-2284o   |
| NUDT4 | hsa-miR-628-5p  |
| NUDT4 | hsa-miR-2917    |
| NUDT4 | hsa-miR-302-5p  |
| NUDT4 | hsa-miR-6779-3p |

|       |                  |
|-------|------------------|
| NUDT4 | hsa-miR-182-5p   |
| NUDT4 | hsa-miR-130b-5p  |
| NUDT4 | hsa-miR-219-1-3p |
| NUDT4 | hsa-miR-7647-3p  |
| NUDT4 | hsa-miR-140-3p.2 |
| NUDT4 | hsa-miR-2335     |
| NUDT4 | hsa-miR-3575     |
| NUDT4 | hsa-miR-3691-3p  |
| NUDT4 | hsa-miR-942-3p   |
| NUDT4 | hsa-miR-6323     |
| NUDT4 | hsa-miR-2285n    |
| NUDT4 | hsa-miR-615-3p   |
| NUDT4 | hsa-miR-7026-3p  |
| NUDT4 | hsa-miR-4318     |
| NUDT4 | hsa-miR-16-5p    |
| NUDT4 | hsa-miR-5581-5p  |
| NUDT4 | hsa-miR-136-5p   |
| NUDT4 | hsa-miR-3169     |
| NUDT4 | hsa-miR-6996-3p  |
| NUDT4 | hsa-miR-7236-3p  |
| NUDT4 | hsa-miR-485      |
| NUDT4 | hsa-miR-653      |
| NUDT4 | hsa-miR-4701-3p  |
| NUDT4 | hsa-miR-743-5p   |
| NUDT4 | hsa-miR-4477a    |
| NUDT4 | hsa-miR-6731-5p  |
| NUDT4 | hsa-miR-3163     |
| NUDT4 | hsa-miR-2328-5p  |
| NUDT4 | hsa-miR-106a-3p  |
| NUDT4 | hsa-miR-6764-5p  |
| NUDT4 | hsa-miR-6481     |
| NUDT4 | hsa-miR-629-3p   |
| NUDT4 | hsa-miR-551-5p   |
| NUDT4 | hsa-miR-1812-3p  |
| NUDT4 | hsa-miR-4523     |
| NUDT4 | hsa-miR-572      |
| NUDT4 | hsa-miR-3094-3p  |
| NUDT4 | hsa-miR-548c-3p  |
| NUDT4 | hsa-miR-30e      |
| NUDT4 | hsa-miR-154-3p   |
| NUDT4 | hsa-miR-2483     |
| NUDT4 | hsa-miR-7272-3p  |
| NUDT4 | hsa-miR-7021-5p  |
| NUDT4 | hsa-miR-8818     |
| NUDT4 | hsa-miR-138-1-3p |
| NUDT4 | hsa-miR-4459     |

|       |                  |
|-------|------------------|
| NUDT4 | hsa-miR-7047-3p  |
| NUDT4 | hsa-miR-5006-3p  |
| NUDT4 | hsa-miR-548b-3p  |
| NUDT4 | hsa-miR-2482     |
| NUDT4 | hsa-miR-339-5p   |
| NUDT4 | hsa-miR-7680-3p  |
| NUDT4 | hsa-miR-877-3p   |
| NUDT4 | hsa-miR-7252-3p  |
| NUDT4 | hsa-miR-548aj-3p |
| NUDT4 | hsa-miR-548bb-5p |
| NUDT4 | hsa-miR-196b-3p  |
| NUDT4 | hsa-miR-2447     |
| NUDT4 | hsa-miR-151      |
| NUDT4 | hsa-miR-7110-5p  |
| NUDT4 | hsa-miR-7862     |
| NUDT4 | hsa-miR-6131     |
| NUDT4 | hsa-miR-361-3p   |
| NUDT4 | hsa-miR-487a     |
| NUDT4 | hsa-miR-2489     |
| NUDT4 | hsa-miR-7169-5p  |
| NUDT4 | hsa-miR-322-5p   |
| NUDT4 | hsa-miR-524-5p   |
| NUDT4 | hsa-miR-192-3p   |
| NUDT4 | hsa-miR-548aef   |
| NUDT4 | hsa-miR-4720-5p  |
| NUDT4 | hsa-miR-6083     |
| NUDT4 | hsa-miR-7365-3p  |
| NUDT4 | hsa-miR-183-3p   |
| NUDT4 | hsa-miR-7161-5p  |
| NUDT4 | hsa-miR-4266     |
| NUDT4 | hsa-miR-7023-3p  |
| NUDT4 | hsa-miR-294-3p   |
| NUDT4 | hsa-miR-7019-3p  |
| NUDT4 | hsa-miR-4311     |
| NUDT4 | hsa-miR-3113-3p  |
| NUDT4 | hsa-miR-582-5p   |
| NUDT4 | hsa-miR-2284a    |
| NUDT4 | hsa-miR-2330-3p  |
| NUDT4 | hsa-miR-3561-5p  |
| NUDT4 | hsa-miR-651      |
| NUDT4 | hsa-miR-1643b-5p |
| NUDT4 | hsa-miR-2384     |
| NUDT4 | hsa-miR-346      |
| NUDT4 | hsa-miR-718      |
| NUDT4 | hsa-miR-6845-5p  |
| NUDT4 | hsa-miR-674-5p   |

|       |                    |
|-------|--------------------|
| NUDT4 | hsa-miR-5195-5p    |
| NUDT4 | hsa-miR-190a-3p    |
| NUDT4 | hsa-miR-501-5p     |
| NUDT4 | hsa-miR-432-5p     |
| NUDT4 | hsa-miR-29         |
| NUDT4 | hsa-miR-2285x      |
| NUDT4 | hsa-miR-873b       |
| NUDT4 | hsa-miR-1277-5p    |
| NUDT4 | hsa-miR-548c-5p    |
| NUDT4 | hsa-miR-518        |
| NUDT4 | hsa-miR-544a       |
| NUDT4 | hsa-miR-125b-2-3p  |
| NUDT4 | hsa-miR-6801-5p    |
| NUDT4 | hsa-miR-4512       |
| NUDT4 | hsa-miR-6340       |
| NUDT4 | hsa-miR-20-3p      |
| NUDT4 | hsa-miR-30         |
| NUDT4 | hsa-miR-92a-1-5p   |
| NUDT4 | hsa-miR-892a       |
| NUDT4 | hsa-miR-33-3p      |
| NUDT4 | hsa-miR-4716-3p    |
| NUDT4 | hsa-miR-409-5p     |
| NUDT4 | hsa-miR-550        |
| NUDT4 | hsa-miR-10b-3p     |
| NUDT4 | hsa-miR-7025-3p    |
| NUDT4 | hsa-miR-20         |
| NUDT4 | hsa-miR-2385-3p    |
| NUDT4 | hsa-miR-548d-5p    |
| NUDT4 | hsa-miR-344a-3p    |
| NUDT4 | hsa-miR-708-5p     |
| NUDT4 | hsa-miR-2296       |
| NUDT4 | hsa-miR-4723-3p    |
| NUDT4 | hsa-miR-3140-3p    |
| NUDT4 | hsa-miR-3674       |
| NUDT4 | hsa-miR-545-5p     |
| NUDT4 | hsa-miR-7094b-2-5p |
| NUDT4 | hsa-miR-6732-3p    |
| NUDT4 | hsa-miR-4717-3p    |
| NUDT4 | hsa-miR-140-5p     |
| NUDT4 | hsa-miR-409b       |
| NUDT4 | hsa-miR-599        |
| NUDT4 | hsa-miR-4684-5p    |
| NUDT4 | hsa-miR-504-5p     |
| NUDT4 | hsa-miR-1253       |
| NUDT4 | hsa-miR-1914-5p    |
| NUDT4 | hsa-miR-7976       |

|       |                  |
|-------|------------------|
| NUDT4 | hsa-miR-694      |
| NUDT4 | hsa-miR-766-5p   |
| NUDT4 | hsa-miR-6362     |
| NUDT4 | hsa-miR-6799-5p  |
| NUDT4 | hsa-miR-704      |
| NUDT4 | hsa-miR-8868     |
| NUDT4 | hsa-miR-6942-5p  |
| NUDT4 | hsa-miR-548az-3p |
| NUDT4 | hsa-miR-4419b    |
| NUDT4 | hsa-miR-520g-3p  |
| NUDT4 | hsa-miR-18b-3p   |
| NUDT4 | hsa-miR-126a-5p  |
| NUDT4 | hsa-miR-686      |
| NUDT4 | hsa-miR-892b     |
| NUDT4 | hsa-miR-7457-5p  |
| NUDT4 | hsa-miR-485-3p   |
| NUDT4 | hsa-miR-182-3p   |
| NUDT4 | hsa-miR-7348-5p  |
| NUDT4 | hsa-miR-548a-5p  |
| NUDT4 | hsa-miR-212-3p   |
| NUDT4 | hsa-miR-199-5p   |
| NUDT4 | hsa-miR-6516-3p  |
| NUDT4 | hsa-miR-28-3p    |
| NUDT4 | hsa-miR-4524a-5p |
| NUDT4 | hsa-miR-7112-3p  |
| NUDT4 | hsa-miR-7320-5p  |
| NUDT4 | hsa-miR-425      |
| NUDT4 | hsa-miR-4724-3p  |
| NUDT4 | hsa-miR-520      |
| NUDT4 | hsa-miR-101-5p   |
| NUDT4 | hsa-miR-216a     |
| NUDT4 | hsa-miR-6758-3p  |
| NUDT4 | hsa-miR-7222-5p  |
| NUDT4 | hsa-miR-3173-5p  |
| NUDT4 | hsa-miR-4695-3p  |
| NUDT4 | hsa-miR-4427     |
| NUDT4 | hsa-miR-3059-3p  |
| NUDT4 | hsa-miR-2373-3p  |
| NUDT4 | hsa-miR-510-3p   |
| NUDT4 | hsa-miR-3100-3p  |
| NUDT4 | hsa-miR-152-5p   |
| NUDT4 | hsa-miR-663a     |
| NUDT4 | hsa-miR-3473g    |
| NUDT4 | hsa-miR-6757-3p  |
| NUDT4 | hsa-miR-6380     |
| NUDT4 | hsa-miR-6515-5p  |



|       |                   |
|-------|-------------------|
| NUDT4 | hsa-miR-8873a     |
| NUDT4 | hsa-miR-765       |
| NUDT4 | hsa-miR-30-5p     |
| NUDT4 | hsa-miR-16-2-3p   |
| NUDT4 | hsa-miR-135b-5p   |
| NUDT4 | hsa-miR-653-3p    |
| NUDT4 | hsa-miR-4288      |
| NUDT4 | hsa-miR-519       |
| NUDT4 | hsa-miR-4322      |
| NUDT4 | hsa-miR-465c-5p   |
| NUDT4 | hsa-miR-203b-5p   |
| NUDT4 | hsa-miR-505-3p    |
| NUDT4 | hsa-miR-1285-3p   |
| NUDT4 | hsa-miR-7296-3p   |
| NUDT4 | hsa-miR-197-3p    |
| NUDT4 | hsa-miR-6895-3p   |
| NUDT4 | hsa-miR-1927      |
| NUDT4 | hsa-miR-33        |
| NUDT4 | hsa-miR-660-5p    |
| NUDT4 | hsa-let-7abf-3p   |
| NUDT4 | hsa-miR-889       |
| NUDT4 | hsa-miR-7310-5p   |
| NUDT4 | hsa-miR-942-5p    |
| NUDT4 | hsa-miR-7170-5p   |
| NUDT4 | hsa-miR-301-5p    |
| NUDT4 | hsa-miR-380       |
| NUDT4 | hsa-miR-549a      |
| NUDT4 | hsa-miR-4296      |
| NUDT4 | hsa-miR-200b-3p   |
| NUDT4 | hsa-miR-548l      |
| NUDT4 | hsa-miR-769-5p    |
| NUDT4 | hsa-miR-20b-3p    |
| NUDT4 | hsa-miR-7398a-3p  |
| NUDT4 | hsa-miR-4488      |
| NUDT4 | hsa-miR-6733-3p   |
| NUDT4 | hsa-miR-1612      |
| NUDT4 | hsa-miR-450a-2-3p |
| NUDT4 | hsa-miR-5010-3p   |
| NUDT4 | hsa-miR-586       |
| NUDT4 | hsa-miR-526       |
| NUDT4 | hsa-miR-7074-5p   |
| NUDT4 | hsa-miR-5684      |
| NUDT4 | hsa-miR-7151-5p   |
| NUDT4 | hsa-miR-550a-5p   |
| NUDT4 | hsa-miR-489       |
| NUDT4 | hsa-miR-548au-5p  |

|       |                 |
|-------|-----------------|
| NUDT4 | hsa-miR-548ag   |
| NUDT4 | hsa-miR-3558-5p |
| NUDT4 | hsa-miR-6500-3p |
| NUDT4 | hsa-miR-489-3p  |
| NUDT4 | hsa-miR-4476    |
| NUDT4 | hsa-miR-7084-3p |
| NUDT4 | hsa-miR-363-3p  |
| NUDT4 | hsa-miR-7109-3p |
| NUDT4 | hsa-miR-672-3p  |
| NUDT4 | hsa-miR-7331-5p |
| NUDT4 | hsa-miR-1267    |
| NUDT4 | hsa-miR-5618-5p |
| NUDT4 | hsa-miR-23-5p   |
| NUDT4 | hsa-miR-124     |
| NUDT4 | hsa-miR-374-5p  |
| NUDT4 | hsa-miR-188-3p  |
| NUDT4 | hsa-miR-939-5p  |
| NUDT4 | hsa-miR-92-3p   |
| NUDT4 | hsa-miR-669k-5p |
| NUDT4 | hsa-miR-887-5p  |
| NUDT4 | hsa-miR-342-5p  |
| NUDT4 | hsa-miR-679     |
| NUDT4 | hsa-miR-10a-3p  |
| NUDT4 | hsa-miR-1912    |
| NUDT4 | hsa-miR-7192-5p |
| NUDT4 | hsa-miR-3099-3p |
| NUDT4 | hsa-miR-7650-3p |
| NUDT4 | hsa-miR-762     |
| NUDT4 | hsa-miR-7351-3p |
| NUDT4 | hsa-miR-2285j   |
| NUDT4 | hsa-miR-7232-5p |
| NUDT4 | hsa-miR-4719    |
| NUDT4 | hsa-miR-3609    |
| NUDT4 | hsa-miR-7178-3p |
| NUDT4 | hsa-miR-698-5p  |
| NUDT4 | hsa-miR-7360-5p |
| NUDT4 | hsa-miR-8550    |
| NUDT4 | hsa-miR-126-3p  |
| NUDT4 | hsa-miR-335-3p  |
| NUDT4 | hsa-miR-3692-5p |
| NUDT4 | hsa-miR-761     |
| NUDT4 | hsa-miR-692     |
| NUDT4 | hsa-miR-4705    |
| NUDT4 | hsa-miR-3913-3p |
| NUDT4 | hsa-miR-6998-5p |
| NUDT4 | hsa-miR-3183    |

|       |                  |
|-------|------------------|
| NUDT4 | hsa-miR-2113     |
| NUDT4 | hsa-miR-4470     |
| NUDT4 | hsa-miR-2424     |
| NUDT4 | hsa-miR-3596c    |
| NUDT4 | hsa-miR-8104     |
| NUDT4 | hsa-miR-4795-5p  |
| NUDT4 | hsa-miR-7332-3p  |
| NUDT4 | hsa-miR-6086     |
| NUDT4 | hsa-miR-338-3p   |
| NUDT4 | hsa-miR-548o-5p  |
| NUDT4 | hsa-miR-410      |
| NUDT4 | hsa-miR-1185-5p  |
| NUDT4 | hsa-miR-605-5p   |
| NUDT4 | hsa-miR-3098-3p  |
| NUDT4 | hsa-miR-7281-3p  |
| NUDT4 | hsa-miR-7251-5p  |
| NUDT4 | hsa-miR-1264-3p  |
| NUDT4 | hsa-miR-5132-3p  |
| NUDT4 | hsa-miR-429-5p   |
| NUDT4 | hsa-miR-548at-5p |
| NUDT4 | hsa-miR-7677-5p  |
| NUDT4 | hsa-miR-580      |
| NUDT4 | hsa-miR-7a-2-3p  |
| NUDT4 | hsa-miR-302c-5p  |
| NUDT4 | hsa-miR-18       |
| NUDT4 | hsa-miR-16-5p    |
| NUDT4 | hsa-miR-6128     |
| NUDT4 | hsa-miR-327      |
| NUDT4 | hsa-miR-513b-3p  |
| NUDT4 | hsa-miR-4287     |
| NUDT4 | hsa-miR-2466-5p  |
| NUDT4 | hsa-let-7f-1-3p  |
| NUDT4 | hsa-miR-4325     |
| NUDT4 | hsa-miR-6907-5p  |
| NUDT4 | hsa-miR-129-5p   |
| NUDT4 | hsa-miR-1224-3p  |
| NUDT4 | hsa-miR-6867-5p  |
| NUDT4 | hsa-miR-624-5p   |
| NUDT4 | hsa-miR-1255b-5p |
| NUDT4 | hsa-miR-8816     |
| NUDT4 | hsa-miR-124-3p.1 |
| NUDT4 | hsa-miR-452-5p   |
| NUDT4 | hsa-miR-101-2-5p |
| NUDT4 | hsa-miR-200b-5p  |
| NUDT4 | hsa-miR-3088-5p  |
| NUDT4 | hsa-miR-551b-5p  |

|       |                   |
|-------|-------------------|
| NUDT4 | hsa-miR-1231      |
| NUDT4 | hsa-miR-570-3p    |
| NUDT4 | hsa-miR-7068-3p   |
| NUDT4 | hsa-miR-935       |
| NUDT4 | hsa-miR-6946-3p   |
| NUDT4 | hsa-miR-1245b-3p  |
| NUDT4 | hsa-miR-8802      |
| NUDT4 | hsa-miR-376a-5p   |
| NUDT4 | hsa-miR-7269-5p   |
| NUDT4 | hsa-miR-3975      |
| NUDT4 | hsa-miR-7294-5p   |
| NUDT4 | hsa-miR-7215-5p   |
| NUDT4 | hsa-miR-195-5p    |
| NUDT4 | hsa-miR-522-3p    |
| NUDT4 | hsa-miR-555       |
| NUDT4 | hsa-miR-7023-5p   |
| NUDT4 | hsa-miR-3190-3p   |
| NUDT4 | hsa-miR-770       |
| NUDT4 | hsa-miR-4684-3p   |
| NUDT4 | hsa-miR-452-3p    |
| NUDT4 | hsa-miR-3074-2-3p |
| NUDT4 | hsa-miR-3150a-5p  |
| NUDT4 | hsa-miR-513       |
| NUDT4 | hsa-miR-544-5p    |
| NUDT4 | hsa-miR-7648-3p   |
| NUDT4 | hsa-miR-3175      |
| NUDT4 | hsa-miR-3134      |
| NUDT4 | hsa-miR-4673      |
| NUDT4 | hsa-miR-1258      |
| NUDT4 | hsa-miR-376e      |
| NUDT4 | hsa-miR-4999-5p   |
| NUDT4 | hsa-miR-7106-5p   |
| NUDT4 | hsa-miR-548am-5p  |
| NUDT4 | hsa-miR-1584-3p   |
| NUDT4 | hsa-miR-4540      |
| NUDT4 | hsa-miR-5110      |
| NUDT4 | hsa-miR-7863      |
| NUDT4 | hsa-miR-338-5p    |
| NUDT4 | hsa-miR-1915-3p   |
| NUDT4 | hsa-miR-548i      |
| NUDT4 | hsa-miR-6514-3p   |
| NUDT4 | hsa-miR-1290      |
| NUDT4 | hsa-miR-7188-3p   |
| NUDT4 | hsa-miR-3191-5p   |
| NUDT4 | hsa-miR-539-5p    |
| NUDT4 | hsa-miR-3065-3p   |

|       |                   |
|-------|-------------------|
| NUDT4 | hsa-miR-7330-3p   |
| NUDT4 | hsa-miR-548h-5p   |
| NUDT4 | hsa-miR-6893-5p   |
| NUDT4 | hsa-miR-3129-5p   |
| NUDT4 | hsa-miR-548y      |
| NUDT4 | hsa-miR-6970-5p   |
| NUDT4 | hsa-miR-8806      |
| NUDT4 | hsa-miR-8880      |
| NUDT4 | hsa-miR-449c-3p   |
| NUDT4 | hsa-miR-548j-3p   |
| NUDT4 | hsa-miR-2371      |
| NUDT4 | hsa-miR-1896      |
| NUDT4 | hsa-miR-7238-3p   |
| NUDT4 | hsa-miR-763       |
| NUDT4 | hsa-miR-96-3p     |
| NUDT4 | hsa-miR-516b-5p   |
| NUDT4 | hsa-miR-450a-1-3p |
| NUDT4 | hsa-miR-7213-5p   |
| NUDT4 | hsa-miR-522-3p    |
| NUDT4 | hsa-miR-885-3p    |
| NUDT4 | hsa-miR-875-5p    |
| NUDT4 | hsa-miR-24-3p     |
| NUDT4 | hsa-miR-23a-5p    |
| NUDT4 | hsa-miR-2352      |
| NUDT4 | hsa-miR-4480      |
| NUDT4 | hsa-miR-8814      |
| NUDT4 | hsa-miR-6943-5p   |
| NUDT4 | hsa-miR-876-5p    |
| NUDT4 | hsa-miR-3145-3p   |
| NUDT4 | hsa-miR-335-5p    |
| NUDT4 | hsa-miR-181b-1-3p |
| NUDT4 | hsa-miR-210       |
| NUDT4 | hsa-miR-344-5p    |
| NUDT4 | hsa-miR-4704-5p   |
| NUDT4 | hsa-miR-3152-3p   |
| NUDT4 | hsa-miR-450b-3p   |
| NUDT4 | hsa-miR-4727-5p   |
| NUDT4 | hsa-miR-126b-5p   |
| NUDT4 | hsa-miR-3560      |
| NUDT4 | hsa-miR-7024-3p   |
| NUDT4 | hsa-miR-4433b-3p  |
| NUDT4 | hsa-miR-7219-5p   |
| NUDT4 | hsa-miR-3925-5p   |
| NUDT4 | hsa-miR-4793-5p   |
| NUDT4 | hsa-miR-4679      |
| NUDT4 | hsa-miR-3588      |

|       |                   |
|-------|-------------------|
| NUDT4 | hsa-miR-2356      |
| NUDT4 | hsa-miR-2284w     |
| NUDT4 | hsa-miR-550b-2-5p |
| NUDT4 | hsa-miR-3692-3p   |
| NUDT4 | hsa-miR-26-2-3p   |
| NUDT4 | hsa-miR-7180-5p   |
| NUDT4 | hsa-miR-6988-5p   |
| NUDT4 | hsa-miR-4694-3p   |
| NUDT4 | hsa-miR-6746-5p   |
| NUDT4 | hsa-miR-548ai     |
| NUDT4 | hsa-miR-875       |
| NUDT4 | hsa-miR-1295b-3p  |
| NUDT4 | hsa-miR-743ab-3p  |
| NUDT4 | hsa-miR-101b-3p.2 |
| NUDT4 | hsa-miR-548ba     |
| NUDT4 | hsa-miR-4282      |
| NUDT4 | hsa-miR-5697-5p   |
| NUDT4 | hsa-miR-6737-5p   |
| NUDT4 | hsa-miR-377-5p    |
| NUDT4 | hsa-miR-644a      |
| NUDT4 | hsa-miR-7277-3p   |
| NUDT4 | hsa-miR-6371      |
| NUDT4 | hsa-miR-8801      |
| NUDT4 | hsa-miR-302d-5p   |
| NUDT4 | hsa-miR-127-5p    |
| NUDT4 | hsa-miR-3090-3p   |
| NUDT4 | hsa-miR-2320-5p   |
| NUDT4 | hsa-miR-1243-5p   |
| NUDT4 | hsa-miR-8797      |
| NUDT4 | hsa-miR-888-3p    |
| NUDT4 | hsa-miR-1542-5p   |
| NUDT4 | hsa-miR-181-3p    |
| NUDT4 | hsa-miR-2284z     |
| NUDT4 | hsa-miR-203a-3p.1 |
| NUDT4 | hsa-miR-7850-5p   |
| NUDT4 | hsa-miR-563       |
| NUDT4 | hsa-miR-6941-5p   |
| NUDT4 | hsa-miR-6403      |
| NUDT4 | hsa-miR-4790-3p   |
| NUDT4 | hsa-miR-7301-5p   |
| NUDT4 | hsa-miR-2284u     |
| NUDT4 | hsa-miR-7655-5p   |
| NUDT4 | hsa-miR-548m      |
| NUDT4 | hsa-miR-5580-3p   |
| NUDT4 | hsa-miR-138-3p    |
| NUDT4 | hsa-miR-7323-5p   |

|       |                  |
|-------|------------------|
| NUDT4 | hsa-miR-5093     |
| NUDT4 | hsa-miR-7163-5p  |
| NUDT4 | hsa-miR-3200-3p  |
| NUDT4 | hsa-miR-369-3p   |
| NUDT4 | hsa-miR-4731-3p  |
| NUDT4 | hsa-miR-367-3p   |
| NUDT4 | hsa-miR-7389-5p  |
| NUDT4 | hsa-miR-486-5p   |
| NUDT4 | hsa-miR-6736-5p  |
| NUDT4 | hsa-miR-135      |
| NUDT4 | hsa-miR-4760-5p  |
| NUDT4 | hsa-miR-6358     |
| NUDT4 | hsa-miR-1550-3p  |
| NUDT4 | hsa-miR-6956-3p  |
| NUDT4 | hsa-miR-30e-3p   |
| NUDT4 | hsa-miR-1190     |
| NUDT4 | hsa-miR-6780a-5p |
| NUDT4 | hsa-miR-7287-3p  |
| NUDT4 | hsa-miR-1257     |
| NUDT4 | hsa-miR-337-3p   |
| NUDT4 | hsa-miR-3200-3p  |
| NUDT4 | hsa-miR-4263     |
| NUDT4 | hsa-miR-1954     |
| NUDT4 | hsa-miR-5002-5p  |
| NUDT4 | hsa-miR-8791     |
| NUDT4 | hsa-miR-6720-3p  |
| NUDT4 | hsa-miR-1271-5p  |
| NUDT4 | hsa-miR-7093-5p  |
| NUDT4 | hsa-miR-556-3p   |
| NUDT4 | hsa-miR-135a-3p  |
| NUDT4 | hsa-miR-3613-3p  |
| NUDT4 | hsa-miR-7360-3p  |
| NUDT4 | hsa-miR-936      |
| NUDT4 | hsa-miR-6372     |
| NUDT4 | hsa-miR-6071     |
| NUDT4 | hsa-miR-498      |
| NUDT4 | hsa-miR-6376     |
| NUDT4 | hsa-miR-3187-5p  |
| NUDT4 | hsa-miR-454      |
| NUDT4 | hsa-miR-7663-5p  |
| NUDT4 | hsa-miR-3122     |
| NUDT4 | hsa-miR-3092-3p  |
| NUDT4 | hsa-miR-4699-3p  |
| NUDT4 | hsa-miR-7114-5p  |
| NUDT4 | hsa-miR-4768-5p  |
| NUDT4 | hsa-miR-3533     |

|       |                  |
|-------|------------------|
| NUDT4 | hsa-miR-892-5p   |
| NUDT4 | hsa-miR-2346     |
| NUDT4 | hsa-miR-542-3p   |
| NUDT4 | hsa-miR-5617-3p  |
| NUDT4 | hsa-miR-8069     |
| NUDT4 | hsa-miR-548ay-5p |
| NUDT4 | hsa-miR-519-5p   |
| NUDT4 | hsa-miR-6769b-5p |
| NUDT4 | hsa-miR-503-5p   |
| NUDT4 | hsa-miR-7385b-3p |
| NUDT4 | hsa-miR-4685-3p  |
| NUDT4 | hsa-miR-7089-3p  |
| NUDT4 | hsa-miR-2338     |
| NUDT4 | hsa-miR-6513-5p  |
| NUDT4 | hsa-miR-5683     |
| NUDT4 | hsa-miR-2488     |
| NUDT4 | hsa-miR-6905-3p  |
| NUDT4 | hsa-miR-1237-5p  |
| NUDT4 | hsa-miR-7090-3p  |
| NUDT4 | hsa-miR-1-3p     |
| NUDT4 | hsa-miR-7243-3p  |
| NUDT4 | hsa-miR-6759-5p  |
| NUDT4 | hsa-miR-6766-5p  |
| NUDT4 | hsa-miR-336-3p   |
| NUDT4 | hsa-miR-5706     |
| NUDT4 | hsa-miR-4769-5p  |
| NUDT4 | hsa-let-7b-3p    |
| NUDT4 | hsa-miR-7667-5p  |
| NUDT4 | hsa-miR-8107     |
| NUDT4 | hsa-miR-590-3p   |
| NUDT4 | hsa-miR-6916-5p  |
| NUDT4 | hsa-miR-7386i-5p |
| NUDT4 | hsa-miR-6927-5p  |
| NUDT4 | hsa-miR-7386g-3p |
| NUDT4 | hsa-miR-541-3p   |
| NUDT4 | hsa-miR-2313-5p  |
| NUDT4 | hsa-miR-508-5p   |
| NUDT4 | hsa-miR-7321-5p  |
| NUDT4 | hsa-miR-3105-3p  |
| NUDT4 | hsa-miR-29b-1-5p |
| NUDT4 | hsa-miR-2285ad   |
| NUDT4 | hsa-miR-3188     |
| NUDT4 | hsa-miR-455-5p   |
| NUDT4 | hsa-miR-216      |
| NUDT4 | hsa-miR-6865-5p  |
| NUDT4 | hsa-miR-32-3p    |



|       |                   |
|-------|-------------------|
| NUDT4 | hsa-miR-650abc    |
| NUDT4 | hsa-miR-1258-5p   |
| NUDT4 | hsa-miR-378-5p    |
| NUDT4 | hsa-miR-2396      |
| NUDT4 | hsa-miR-7682-3p   |
| NUDT4 | hsa-miR-92a-2-5p  |
| NUDT4 | hsa-miR-4796-3p   |
| NUDT4 | hsa-miR-153-5p    |
| NUDT4 | hsa-miR-6848-3p   |
| NUDT4 | hsa-miR-5100      |
| NUDT4 | hsa-miR-1966-3p   |
| NUDT4 | hsa-miR-3154      |
| NUDT4 | hsa-miR-741-3p    |
| NUDT4 | hsa-miR-940       |
| NUDT4 | hsa-miR-8060      |
| NUDT4 | hsa-miR-1b-5p     |
| NUDT4 | hsa-miR-3961      |
| NUDT4 | hsa-miR-8817      |
| NUDT4 | hsa-miR-4469      |
| NUDT4 | hsa-miR-6087      |
| NUDT4 | hsa-miR-4729      |
| NUDT4 | hsa-miR-221-3p    |
| NUDT4 | hsa-miR-101a-3p.2 |
| NUDT4 | hsa-miR-6827-5p   |
| NUDT4 | hsa-miR-574-5p    |
| NUDT4 | hsa-miR-4755-5p   |
| NUDT4 | hsa-miR-3529-3p   |
| NUDT4 | hsa-miR-7017-3p   |
| NUDT4 | hsa-miR-6809-3p   |
| NUDT4 | hsa-miR-460-5p    |
| NUDT4 | hsa-miR-4443      |
| NUDT4 | hsa-miR-4524-5p   |
| NUDT4 | hsa-miR-140-3p    |
| NUDT4 | hsa-miR-6132      |
| NUDT4 | hsa-miR-1-3p      |
| NUDT4 | hsa-miR-6805-5p   |
| NUDT4 | hsa-miR-4773      |
| NUDT4 | hsa-miR-7678-3p   |
| NUDT4 | hsa-miR-8061      |
| NUDT4 | hsa-miR-143-3p    |
| NUDT4 | hsa-miR-6536      |
| NUDT4 | hsa-miR-6771-3p   |
| NUDT4 | hsa-miR-6881-3p   |
| NUDT4 | hsa-miR-625-3p    |
| NUDT4 | hsa-miR-6895-5p   |
| NUDT4 | hsa-miR-6940-5p   |

|       |                  |
|-------|------------------|
| NUDT4 | hsa-miR-630      |
| NUDT4 | hsa-miR-4696     |
| NUDT4 | hsa-miR-3071-5p  |
| NUDT4 | hsa-miR-2322-3p  |
| NUDT4 | hsa-miR-7333-3p  |
| NUDT4 | hsa-miR-6520     |
| NUDT4 | hsa-miR-628-3p   |
| NUDT4 | hsa-miR-367-5p   |
| NUDT4 | hsa-miR-6332     |
| NUDT4 | hsa-miR-3552     |
| NUDT4 | hsa-miR-4651     |
| NUDT4 | hsa-miR-587      |
| NUDT4 | hsa-miR-2285u    |
| NUDT4 | hsa-miR-2317     |
| NUDT4 | hsa-miR-3945     |
| NUDT4 | hsa-miR-7651-3p  |
| NUDT4 | hsa-miR-381-5p   |
| NUDT4 | hsa-miR-4645-3p  |
| NUDT4 | hsa-miR-196a-3p  |
| NUDT4 | hsa-miR-599-3p   |
| NUDT4 | hsa-miR-3607-3p  |
| NUDT4 | hsa-miR-24-3p    |
| NUDT4 | hsa-miR-6862-5p  |
| NUDT4 | hsa-miR-371      |
| NUDT4 | hsa-miR-466c-5p  |
| NUDT4 | hsa-miR-219c-3p  |
| NUDT4 | hsa-miR-6335     |
| NUDT4 | hsa-miR-7080-5p  |
| NUDT4 | hsa-miR-4647     |
| NUDT4 | hsa-miR-1841     |
| NUDT4 | hsa-miR-4460     |
| NUDT4 | hsa-miR-4709-3p  |
| NUDT4 | hsa-miR-3164     |
| NUDT4 | hsa-miR-4666a-5p |
| NUDT4 | hsa-miR-9768-3p  |
| NUDT4 | hsa-miR-290b-5p  |
| NUDT4 | hsa-miR-4419a    |
| NUDT4 | hsa-miR-133a-5p  |
| NUDT4 | hsa-miR-7350-3p  |
| NUDT4 | hsa-miR-1462-5p  |
| NUDT4 | hsa-miR-511      |
| NUDT4 | hsa-miR-4689     |
| NUDT4 | hsa-miR-6730-5p  |
| NUDT4 | hsa-miR-367-3p   |
| NUDT4 | hsa-miR-4438     |
| NUDT4 | hsa-miR-3062-5p  |

|       |                   |
|-------|-------------------|
| NUDT4 | hsa-miR-369-3p    |
| NUDT4 | hsa-miR-3967      |
| NUDT4 | hsa-miR-2362      |
| NUDT4 | hsa-miR-668       |
| NUDT4 | hsa-miR-31-5p     |
| NUDT4 | hsa-miR-4722-5p   |
| NUDT4 | hsa-miR-5591-3p   |
| NUDT4 | hsa-miR-3929      |
| NUDT4 | hsa-miR-605       |
| NUDT4 | hsa-miR-7-5p      |
| NUDT4 | hsa-miR-296-3p    |
| NUDT4 | hsa-miR-2480      |
| NUDT4 | hsa-miR-3185      |
| NUDT4 | hsa-miR-294       |
| NUDT4 | hsa-miR-8824      |
| NUDT4 | hsa-miR-200a-3p   |
| NUDT4 | hsa-miR-3613b     |
| NUDT4 | hsa-miR-1434-5p   |
| NUDT4 | hsa-miR-497-5p    |
| NUDT4 | hsa-miR-593-3p    |
| NUDT4 | hsa-miR-1324      |
| NUDT4 | hsa-miR-2110      |
| NUDT4 | hsa-miR-467f      |
| NUDT4 | hsa-miR-1255a     |
| NUDT4 | hsa-miR-7366-5p   |
| NUDT4 | hsa-miR-548am-3p  |
| NUDT4 | hsa-miR-218a-1-3p |
| NUDT4 | hsa-miR-665       |
| NUDT4 | hsa-miR-559       |
| NUDT4 | hsa-miR-1238-3p   |
| NUDT4 | hsa-miR-4446-3p   |
| NUDT4 | hsa-miR-6770-5p   |
| NUDT4 | hsa-miR-600       |
| NUDT4 | hsa-miR-409       |
| NUDT4 | hsa-miR-7061-5p   |
| NUDT4 | hsa-miR-1247-5p   |
| NUDT4 | hsa-miR-8086      |
| NUDT4 | hsa-miR-760-5p    |
| NUDT4 | hsa-miR-15a-3p    |
| NUDT4 | hsa-miR-155-5p    |
| NUDT4 | hsa-miR-145-5p    |
| NUDT4 | hsa-miR-5787      |
| NUDT4 | hsa-miR-343       |
| NUDT4 | hsa-miR-769       |
| NUDT4 | hsa-miR-381-3p    |
| NUDT4 | hsa-miR-105-5p    |

|       |                  |
|-------|------------------|
| NUDT4 | hsa-miR-8846     |
| NUDT4 | hsa-miR-517      |
| NUDT4 | hsa-miR-548ab    |
| NUDT4 | hsa-miR-545-3p   |
| NUDT4 | hsa-miR-2358     |
| NUDT4 | hsa-miR-138-2-3p |
| NUDT4 | hsa-miR-885      |
| NUDT4 | hsa-miR-378-3p   |
| NUDT4 | hsa-miR-182-5p   |
| NUDT4 | hsa-miR-4666a-3p |
| NUDT4 | hsa-miR-130a-5p  |
| NUDT4 | hsa-miR-449b-3p  |
| NUDT4 | hsa-miR-6777-3p  |
| NUDT4 | hsa-miR-25-3p    |
| NUDT4 | hsa-miR-451b     |
| NUDT4 | hsa-miR-4755-3p  |
| NUDT4 | hsa-miR-7370-3p  |
| NUDT4 | hsa-miR-186-5p   |
| NUDT4 | hsa-miR-3089-5p  |
| NUDT4 | hsa-miR-3084-3p  |
| NUDT4 | hsa-miR-3619-5p  |
| NUDT4 | hsa-miR-548u     |
| NUDT4 | hsa-miR-7388a-3p |
| NUDT4 | hsa-miR-340-5p   |
| NUDT4 | hsa-miR-7221-5p  |
| NUDT4 | hsa-miR-194-5p   |
| NUDT4 | hsa-miR-590-5p   |
| NUDT4 | hsa-miR-5196-3p  |
| NUDT4 | hsa-miR-6779-5p  |
| NUDT4 | hsa-miR-411-5p   |
| NUDT4 | hsa-miR-6793-3p  |
| NUDT4 | hsa-let-7c-1-3p  |
| NUDT4 | hsa-miR-7111-3p  |
| NUDT4 | hsa-miR-124-3p   |
| NUDT4 | hsa-miR-527      |
| NUDT4 | hsa-miR-329-3p   |
| NUDT4 | hsa-miR-6996-5p  |
| NUDT4 | hsa-miR-3059-5p  |
| NUDT4 | hsa-miR-3170     |
| NUDT4 | hsa-miR-499b-3p  |
| NUDT4 | hsa-miR-1323-3p  |
| NUDT4 | hsa-miR-150-5p   |
| NUDT4 | hsa-miR-8106     |
| NUDT4 | hsa-miR-10       |
| NUDT4 | hsa-miR-1904     |
| NUDT4 | hsa-miR-599-5p   |

|       |                   |
|-------|-------------------|
| NUDT4 | hsa-miR-7192-3p   |
| NUDT4 | hsa-miR-2402      |
| NUDT4 | hsa-miR-544-3p    |
| NUDT4 | hsa-miR-6972-3p   |
| NUDT4 | hsa-miR-713       |
| NUDT4 | hsa-miR-4276      |
| NUDT4 | hsa-miR-376b-3p   |
| NUDT4 | hsa-miR-3121-3p   |
| NUDT4 | hsa-miR-1271-3p   |
| NUDT4 | hsa-miR-377-3p    |
| NUDT4 | hsa-miR-939-3p    |
| NUDT4 | hsa-miR-153       |
| NUDT4 | hsa-miR-550-3p    |
| NUDT4 | hsa-miR-4463      |
| NUDT4 | hsa-miR-466b-2-3p |
| NUDT4 | hsa-miR-32-5p     |
| NUDT4 | hsa-miR-467b-5p   |
| NUDT4 | hsa-miR-493-5p    |
| NUDT4 | hsa-miR-6975-3p   |
| NUDT4 | hsa-miR-7058-5p   |
| NUDT4 | hsa-miR-101-1-5p  |
| NUDT4 | hsa-miR-3108-5p   |
| NUDT4 | hsa-miR-7256-5p   |
| NUDT4 | hsa-miR-6079      |
| NUDT4 | hsa-miR-548h-3p   |
| NUDT4 | hsa-miR-6742-5p   |
| NUDT4 | hsa-miR-4694-5p   |
| NUDT4 | hsa-miR-7649-3p   |
| NUDT4 | hsa-miR-4682      |
| NUDT4 | hsa-miR-8891      |
| NUDT4 | hsa-miR-2284l     |
| NUDT4 | hsa-miR-3150b-5p  |
| NUDT4 | hsa-miR-3558-3p   |
| NUDT4 | hsa-miR-7208-3p   |
| NUDT4 | hsa-miR-15c-3p    |
| NUDT4 | hsa-miR-7247-5p   |
| NUDT4 | hsa-miR-3150b-3p  |
| NUDT4 | hsa-miR-1930-5p   |
| NUDT4 | hsa-miR-1239      |
| NUDT4 | hsa-miR-412-3p    |
| NUDT4 | hsa-miR-2322-5p   |
| NUDT4 | hsa-miR-3551-3p   |
| NUDT4 | hsa-miR-7231-3p   |
| NUDT4 | hsa-miR-6834-5p   |
| NUDT4 | hsa-miR-1255-5p   |
| NUDT4 | hsa-miR-6752-5p   |

|       |                      |
|-------|----------------------|
| NUDT4 | hsa-miR-3549         |
| NUDT4 | hsa-miR-2446         |
| NUDT4 | hsa-miR-3157-3p      |
| NUDT4 | hsa-miR-183-5p.1     |
| NUDT4 | hsa-miR-183-5p       |
| NUDT4 | hsa-miR-7009-5p      |
| NUDT4 | hsa-miR-6982-3p      |
| NUDT4 | hsa-miR-512-5p       |
| NUDT4 | hsa-miR-6785-5p      |
| NUDT4 | hsa-miR-142-5p       |
| NUDT4 | hsa-miR-6941-3p      |
| NUDT4 | hsa-miR-6839-5p      |
| NUDT4 | hsa-miR-211-5p       |
| NUDT4 | hsa-miR-5119         |
| NUDT4 | hsa-miR-2355-5p      |
| NUDT4 | hsa-miR-6828-3p      |
| NUDT4 | hsa-miR-3658         |
| NUDT4 | hsa-miR-633          |
| NUDT4 | hsa-miR-6858-3p      |
| NUDT4 | hsa-miR-503-3p       |
| NUDT4 | hsa-miR-3102-3p.2-3p |
| NUDT4 | hsa-miR-5098         |
| NUDT4 | hsa-miR-212-5p       |
| NUDT4 | hsa-miR-5089-5p      |
| NUDT4 | hsa-miR-124-5p       |
| NUDT4 | hsa-miR-8853         |
| NUDT4 | hsa-miR-624-3p       |
| NUDT4 | hsa-miR-7347-5p      |
| NUDT4 | hsa-miR-6858-5p      |
| NUDT4 | hsa-miR-666-3p       |
| NUDT4 | hsa-miR-3910         |
| NUDT4 | hsa-miR-548f-3p      |
| NUDT4 | hsa-miR-700-5p       |
| NUDT4 | hsa-miR-26           |
| NUDT4 | hsa-miR-299a-5p      |
| NUDT4 | hsa-miR-3099         |
| NUDT4 | hsa-miR-548b-3p      |
| NUDT4 | hsa-miR-7208-5p      |
| NUDT4 | hsa-miR-6800-3p      |
| NUDT4 | hsa-miR-548x-3p      |
| NUDT4 | hsa-miR-520gh        |
| NUDT4 | hsa-miR-468-3p       |
| NUDT4 | hsa-miR-432-5p       |
| NUDT4 | hsa-miR-1195         |
| NUDT4 | hsa-miR-7386k-5p     |
| NUDT4 | hsa-miR-2421         |

|       |                  |
|-------|------------------|
| NUDT4 | hsa-miR-4760-3p  |
| NUDT4 | hsa-miR-668-3p   |
| NUDT4 | hsa-miR-3960     |
| NUDT4 | hsa-miR-548ae-5p |
| NUDT4 | hsa-miR-139-5p   |
| NUDT4 | hsa-miR-6973a-5p |
| NUDT4 | hsa-miR-3570     |
| NUDT4 | hsa-miR-138-5p   |
| NUDT4 | hsa-miR-320a     |
| NUDT4 | hsa-miR-6507-5p  |
| NUDT4 | hsa-miR-764-3p   |
| NUDT4 | hsa-miR-1942     |
| NUDT4 | hsa-miR-4697-5p  |
| NUDT4 | hsa-miR-542      |
| NUDT4 | hsa-miR-7074-3p  |
| NUDT4 | hsa-miR-6359     |
| NUDT4 | hsa-miR-298-5p   |
| NUDT4 | hsa-miR-5589-5p  |
| NUDT4 | hsa-miR-129-2-3p |
| NUDT4 | hsa-miR-6976-5p  |
| NUDT4 | hsa-miR-3135b    |
| NUDT4 | hsa-miR-595      |
| NUDT4 | hsa-miR-7286-3p  |
| NUDT4 | hsa-miR-651-3p   |
| NUDT4 | hsa-miR-146b-3p  |
| NUDT4 | hsa-miR-625-5p   |
| NUDT4 | hsa-miR-466c-3p  |
| NUDT4 | hsa-miR-2455     |
| NUDT4 | hsa-miR-7297-3p  |
| NUDT4 | hsa-miR-7009-3p  |
| NUDT4 | hsa-miR-3971     |
| NUDT4 | hsa-miR-3572-5p  |
| NUDT4 | hsa-miR-8874     |
| NUDT4 | hsa-miR-6506-3p  |
| NUDT4 | hsa-miR-463-5p   |
| NUDT4 | hsa-miR-502-3p   |
| NUDT4 | hsa-miR-6849-3p  |
| NUDT4 | hsa-miR-3082-3p  |
| NUDT4 | hsa-miR-2285     |
| NUDT4 | hsa-miR-3083-5p  |
| NUDT4 | hsa-miR-6994-5p  |
| NUDT4 | hsa-miR-7385e-3p |
| NUDT4 | hsa-miR-7398l-5p |
| NUDT4 | hsa-miR-4768-3p  |
| NUDT4 | hsa-miR-500      |
| NUDT4 | hsa-miR-376c-5p  |

|       |                   |
|-------|-------------------|
| NUDT4 | hsa-miR-4772-3p   |
| NUDT4 | hsa-miR-500-3p    |
| NUDT4 | hsa-miR-520f-5p   |
| NUDT4 | hsa-miR-7260-5p   |
| NUDT4 | hsa-miR-200bc-3p  |
| NUDT4 | hsa-miR-584-3p    |
| NUDT4 | hsa-miR-8869      |
| NUDT4 | hsa-miR-18-3p     |
| NUDT4 | hsa-miR-550a-3-5p |
| NUDT4 | hsa-miR-361-5p    |
| NUDT4 | hsa-miR-548ah-5p  |
| NUDT4 | hsa-miR-680       |
| NUDT4 | hsa-miR-380-5p    |
| NUDT4 | hsa-miR-224-5p    |
| NUDT4 | hsa-miR-429       |
| NUDT4 | hsa-miR-6992-5p   |
| NUDT4 | hsa-miR-654-5p    |
| NUDT4 | hsa-miR-3081-5p   |
| NUDT4 | hsa-miR-6780b-5p  |
| NUDT4 | hsa-miR-465a-5p   |
| NUDT4 | hsa-miR-6077      |
| NUDT4 | hsa-miR-203b-3p   |
| NUDT4 | hsa-miR-4310      |
| NUDT4 | hsa-miR-4797-5p   |
| NUDT4 | hsa-miR-5125      |
| NUDT4 | hsa-miR-7298-5p   |
| NUDT4 | hsa-miR-6812-5p   |
| NUDT4 | hsa-miR-7264-3p   |
| NUDT4 | hsa-miR-4662-5p   |
| NUDT4 | hsa-miR-3103-5p   |
| NUDT4 | hsa-miR-2284-5p   |
| NUDT4 | hsa-miR-374b-3p   |
| NUDT4 | hsa-miR-7702      |
| NUDT4 | hsa-miR-7113-3p   |
| SNUPN | hsa-miR-8901      |
| SNUPN | hsa-miR-324-3p    |
| SNUPN | hsa-miR-2489      |
| SNUPN | hsa-miR-7035-3p   |
| SNUPN | hsa-miR-1247-3p   |
| SNUPN | hsa-miR-376b-5p   |
| SNUPN | hsa-miR-8868      |
| SNUPN | hsa-miR-520f-5p   |
| SNUPN | hsa-miR-4260      |
| SNUPN | hsa-miR-660-3p    |
| SNUPN | hsa-miR-9-3p      |
| SNUPN | hsa-miR-375       |



|       |                  |
|-------|------------------|
| SNUPN | hsa-miR-336-3p   |
| SNUPN | hsa-miR-2329-3p  |
| SNUPN | hsa-miR-2376     |
| SNUPN | hsa-miR-1207     |
| SNUPN | hsa-miR-205-3p   |
| SNUPN | hsa-miR-708-5p   |
| SNUPN | hsa-miR-18-3p    |
| SNUPN | hsa-miR-378-3p   |
| SNUPN | hsa-miR-6945-3p  |
| SNUPN | hsa-miR-1540-5p  |
| SNUPN | hsa-miR-378      |
| SNUPN | hsa-miR-3925-3p  |
| SNUPN | hsa-miR-2477     |
| SNUPN | hsa-miR-7010-5p  |
| SNUPN | hsa-miR-1298-3p  |
| SNUPN | hsa-miR-346      |
| SNUPN | hsa-miR-7069-3p  |
| SNUPN | hsa-miR-4639-3p  |
| SNUPN | hsa-miR-493      |
| SNUPN | hsa-miR-3104-5p  |
| SNUPN | hsa-miR-7215-3p  |
| SNUPN | hsa-miR-335-5p   |
| SNUPN | hsa-miR-7340-3p  |
| SNUPN | hsa-miR-3192     |
| SNUPN | hsa-miR-1227-5p  |
| SNUPN | hsa-miR-1193-3p  |
| SNUPN | hsa-miR-665      |
| SNUPN | hsa-miR-128-1-5p |
| SNUPN | hsa-miR-370-5p   |
| SNUPN | hsa-miR-6807-5p  |
| SNUPN | hsa-miR-582-3p   |
| SNUPN | hsa-miR-8872     |
| SNUPN | hsa-miR-463-5p   |
| SNUPN | hsa-miR-766-3p   |
| SNUPN | hsa-miR-1839-3p  |
| SNUPN | hsa-miR-3180-5p  |
| SNUPN | hsa-miR-2458     |
| SNUPN | hsa-miR-7297-5p  |
| SNUPN | hsa-miR-7391-5p  |
| SNUPN | hsa-miR-2465     |
| SNUPN | hsa-miR-5193     |
| SNUPN | hsa-miR-6897-5p  |
| SNUPN | hsa-miR-212-3p   |
| SNUPN | hsa-miR-103-2-5p |
| SNUPN | hsa-miR-3076-5p  |
| SNUPN | hsa-miR-4289     |

|       |                  |
|-------|------------------|
| SNUPN | hsa-miR-619-5p   |
| SNUPN | hsa-miR-8056     |
| SNUPN | hsa-miR-135-5p   |
| SNUPN | hsa-miR-7027-5p  |
| SNUPN | hsa-miR-181c-3p  |
| SNUPN | hsa-miR-758-3p   |
| SNUPN | hsa-miR-8866     |
| SNUPN | hsa-miR-7363-5p  |
| SNUPN | hsa-miR-182-5p   |
| SNUPN | hsa-miR-6506-5p  |
| SNUPN | hsa-miR-7339-5p  |
| SNUPN | hsa-miR-8874     |
| SNUPN | hsa-miR-3978     |
| SNUPN | hsa-miR-7864     |
| SNUPN | hsa-miR-877-3p   |
| SNUPN | hsa-miR-10b-5p   |
| SNUPN | hsa-miR-411a     |
| SNUPN | hsa-miR-708-5p   |
| SNUPN | hsa-miR-3622b-3p |
| SNUPN | hsa-miR-193b-5p  |
| SNUPN | hsa-miR-6760-3p  |
| SNUPN | hsa-miR-136-3p   |
| SNUPN | hsa-miR-4427     |
| SNUPN | hsa-miR-4509     |
| SNUPN | hsa-miR-490-3p   |
| SNUPN | hsa-miR-3569-3p  |
| SNUPN | hsa-miR-6119-3p  |
| SNUPN | hsa-miR-372-5p   |
| SNUPN | hsa-miR-10-5p    |
| SNUPN | hsa-miR-7015-3p  |
| SNUPN | hsa-miR-2356     |
| SNUPN | hsa-miR-3909     |
| SNUPN | hsa-miR-92a-2-5p |
| SNUPN | hsa-miR-3942-3p  |
| SNUPN | hsa-miR-7330-5p  |
| SNUPN | hsa-miR-8059     |
| SNUPN | hsa-miR-4515     |
| SNUPN | hsa-miR-7291-3p  |
| SNUPN | hsa-miR-7239-5p  |
| SNUPN | hsa-miR-7157-5p  |
| SNUPN | hsa-miR-224-5p   |
| SNUPN | hsa-miR-6523b    |
| SNUPN | hsa-miR-6720-5p  |
| SNUPN | hsa-miR-3093-3p  |
| SNUPN | hsa-miR-7261-5p  |
| SNUPN | hsa-miR-483-5p   |

|       |                  |
|-------|------------------|
| SNUPN | hsa-miR-7084-3p  |
| SNUPN | hsa-miR-1306-3p  |
| SNUPN | hsa-miR-206      |
| SNUPN | hsa-miR-1208     |
| SNUPN | hsa-miR-28-5p    |
| SNUPN | hsa-miR-422      |
| SNUPN | hsa-miR-577      |
| SNUPN | hsa-miR-135      |
| SNUPN | hsa-miR-4640-5p  |
| SNUPN | hsa-miR-452-5p   |
| SNUPN | hsa-miR-5100     |
| SNUPN | hsa-miR-763      |
| SNUPN | hsa-miR-452-5p   |
| SNUPN | hsa-miR-1914-5p  |
| SNUPN | hsa-miR-23-3p    |
| SNUPN | hsa-miR-7683-3p  |
| SNUPN | hsa-miR-7227-3p  |
| SNUPN | hsa-miR-22-5p    |
| SNUPN | hsa-miR-6765-3p  |
| SNUPN | hsa-miR-6833-5p  |
| SNUPN | hsa-miR-7052-3p  |
| SNUPN | hsa-miR-7383-3p  |
| SNUPN | hsa-miR-543-3p   |
| SNUPN | hsa-miR-505-5p   |
| SNUPN | hsa-miR-7066-3p  |
| SNUPN | hsa-miR-7007-3p  |
| SNUPN | hsa-miR-6769b-3p |
| SNUPN | hsa-miR-664-3p   |
| SNUPN | hsa-miR-2897     |
| SNUPN | hsa-miR-186-5p   |
| SNUPN | hsa-miR-6735-3p  |
| SNUPN | hsa-miR-592-3p   |
| SNUPN | hsa-miR-5187-3p  |
| SNUPN | hsa-miR-383-3p   |
| SNUPN | hsa-miR-8827     |
| SNUPN | hsa-miR-3192-5p  |
| SNUPN | hsa-miR-6934-3p  |
| SNUPN | hsa-miR-6858-3p  |
| SNUPN | hsa-miR-3622a-3p |
| SNUPN | hsa-miR-3691-5p  |
| SNUPN | hsa-miR-2380     |
| SNUPN | hsa-miR-4448     |
| SNUPN | hsa-miR-7384-3p  |
| SNUPN | hsa-miR-4752     |
| SNUPN | hsa-miR-320e     |
| SNUPN | hsa-miR-2387     |

|       |                  |
|-------|------------------|
| SNUPN | hsa-miR-7051-3p  |
| SNUPN | hsa-miR-128-3p   |
| SNUPN | hsa-miR-338-3p   |
| SNUPN | hsa-miR-875-5p   |
| SNUPN | hsa-miR-23b-5p   |
| SNUPN | hsa-miR-880-3p   |
| SNUPN | hsa-miR-224-5p   |
| SNUPN | hsa-miR-8055     |
| SNUPN | hsa-miR-216c-5p  |
| SNUPN | hsa-miR-125-5p   |
| SNUPN | hsa-miR-7382-5p  |
| SNUPN | hsa-miR-8895     |
| SNUPN | hsa-miR-376c     |
| SNUPN | hsa-miR-558      |
| SNUPN | hsa-miR-186-5p   |
| SNUPN | hsa-miR-7385b-3p |
| SNUPN | hsa-miR-874-3p   |
| SNUPN | hsa-miR-7296-5p  |
| SNUPN | hsa-miR-6526     |
| SNUPN | hsa-miR-4699-3p  |
| SNUPN | hsa-miR-330-5p   |
| SNUPN | hsa-miR-6927-3p  |
| SNUPN | hsa-miR-132-3p   |
| SNUPN | hsa-miR-2317     |
| SNUPN | hsa-miR-4314     |
| SNUPN | hsa-miR-326-3p   |
| SNUPN | hsa-miR-875-3p   |
| SNUPN | hsa-miR-96-5p    |
| SNUPN | hsa-miR-328-5p   |
| SNUPN | hsa-miR-4474-3p  |
| SNUPN | hsa-miR-376c-5p  |
| SNUPN | hsa-miR-1292-5p  |
| SNUPN | hsa-miR-668      |
| SNUPN | hsa-miR-122      |
| SNUPN | hsa-miR-128      |
| SNUPN | hsa-miR-28-5p    |
| SNUPN | hsa-miR-551b-5p  |
| SNUPN | hsa-miR-766-3p   |
| SNUPN | hsa-miR-3098-5p  |
| SNUPN | hsa-miR-7298-3p  |
| SNUPN | hsa-miR-8825     |
| SNUPN | hsa-miR-6755-3p  |
| SNUPN | hsa-miR-4310     |
| SNUPN | hsa-miR-1-5p     |
| SNUPN | hsa-miR-1269a    |
| SNUPN | hsa-miR-7646-5p  |

|       |                  |
|-------|------------------|
| SNUPN | hsa-miR-29       |
| SNUPN | hsa-miR-5619-5p  |
| SNUPN | hsa-miR-600      |
| SNUPN | hsa-miR-4793-5p  |
| SNUPN | hsa-miR-7054-3p  |
| SNUPN | hsa-miR-1207-3p  |
| SNUPN | hsa-miR-10b-3p   |
| SNUPN | hsa-miR-629-5p   |
| SNUPN | hsa-miR-7158-5p  |
| SNUPN | hsa-miR-4762-5p  |
| SNUPN | hsa-miR-6936-5p  |
| SNUPN | hsa-miR-103-3p   |
| SNUPN | hsa-miR-1288     |
| SNUPN | hsa-miR-3580-3p  |
| SNUPN | hsa-miR-767-3p   |
| SNUPN | hsa-miR-107-3p   |
| SNUPN | hsa-miR-4740-5p  |
| SNUPN | hsa-miR-5572     |
| SNUPN | hsa-miR-6992-3p  |
| SNUPN | hsa-miR-338-3p   |
| SNUPN | hsa-miR-145-3p   |
| SNUPN | hsa-miR-7000-3p  |
| SNUPN | hsa-miR-3183     |
| SNUPN | hsa-miR-668-3p   |
| SNUPN | hsa-miR-669bf-3p |
| SNUPN | hsa-miR-7212-3p  |
| SNUPN | hsa-miR-4471     |
| SNUPN | hsa-miR-7111-3p  |
| SNUPN | hsa-miR-1292-5p  |
| SNUPN | hsa-miR-6845-5p  |
| SNUPN | hsa-miR-29b-1-5p |
| SNUPN | hsa-miR-4267     |
| SNUPN | hsa-miR-524-5p   |
| SNUPN | hsa-miR-2290     |
| SNUPN | hsa-miR-6762-5p  |
| SNUPN | hsa-miR-4723-3p  |
| SNUPN | hsa-miR-1-3p     |
| SNUPN | hsa-miR-1288-3p  |
| SNUPN | hsa-miR-6401     |
| SNUPN | hsa-miR-490-3p   |
| SNUPN | hsa-miR-377-3p   |
| SNUPN | hsa-miR-27       |
| SNUPN | hsa-miR-6794-3p  |
| SNUPN | hsa-miR-892-3p   |
| SNUPN | hsa-miR-6984-5p  |
| SNUPN | hsa-miR-27-3p    |

|       |                   |
|-------|-------------------|
| SNUPN | hsa-miR-4680-3p   |
| SNUPN | hsa-miR-4646-5p   |
| SNUPN | hsa-miR-4744      |
| SNUPN | hsa-miR-204-3p    |
| SNUPN | hsa-miR-450a-2-3p |
| SNUPN | hsa-miR-134       |
| SNUPN | hsa-miR-3133      |
| SNUPN | hsa-miR-6839-3p   |
| WDR4  | hsa-miR-5571-3p   |
| WDR4  | hsa-miR-4672      |
| WDR4  | hsa-miR-7-3p      |
| WDR4  | hsa-miR-3148      |
| WDR4  | hsa-miR-942-3p    |
| WDR4  | hsa-miR-363-3p    |
| WDR4  | hsa-miR-1285-5p   |
| WDR4  | hsa-miR-5683      |
| WDR4  | hsa-miR-7975      |
| WDR4  | hsa-miR-6784-3p   |
| WDR4  | hsa-miR-6874-5p   |
| WDR4  | hsa-miR-199-3p    |
| WDR4  | hsa-miR-222-5p    |
| WDR4  | hsa-miR-421       |
| WDR4  | hsa-miR-1306-3p   |
| WDR4  | hsa-miR-936       |
| WDR4  | hsa-miR-367-3p    |
| WDR4  | hsa-miR-6716-3p   |
| WDR4  | hsa-miR-548g-3p   |
| WDR4  | hsa-miR-495-3p    |
| WDR4  | hsa-miR-377-3p    |
| WDR4  | hsa-miR-4716-5p   |
| WDR4  | hsa-miR-8082      |
| WDR4  | hsa-miR-6792-5p   |
| WDR4  | hsa-miR-185-3p    |
| WDR4  | hsa-miR-221-3p    |
| WDR4  | hsa-miR-6847-5p   |
| WDR4  | hsa-miR-4797-3p   |
| WDR4  | hsa-miR-485       |
| WDR4  | hsa-miR-7846-3p   |
| WDR4  | hsa-miR-1229-3p   |
| WDR4  | hsa-miR-495-3p    |
| WDR4  | hsa-miR-302b-5p   |
| WDR4  | hsa-miR-188-3p    |
| WDR4  | hsa-miR-3613-3p   |
| WDR4  | hsa-miR-203b-5p   |
| WDR4  | hsa-miR-32-5p     |
| WDR4  | hsa-miR-216b-3p   |

|      |                  |
|------|------------------|
| WDR4 | hsa-miR-4534     |
| WDR4 | hsa-miR-4633-3p  |
| WDR4 | hsa-miR-4283     |
| WDR4 | hsa-miR-6500-5p  |
| WDR4 | hsa-miR-222-3p   |
| WDR4 | hsa-miR-4495     |
| WDR4 | hsa-miR-2467-3p  |
| WDR4 | hsa-miR-4699-3p  |
| WDR4 | hsa-miR-342-3p   |
| WDR4 | hsa-miR-6511-3p  |
| WDR4 | hsa-miR-4802-3p  |
| WDR4 | hsa-miR-27a-5p   |
| WDR4 | hsa-miR-3129-5p  |
| WDR4 | hsa-miR-4665-3p  |
| WDR4 | hsa-miR-4804-3p  |
| WDR4 | hsa-miR-7198-3p  |
| WDR4 | hsa-miR-543-3p   |
| WDR4 | hsa-miR-3914     |
| WDR4 | hsa-miR-6862-3p  |
| WDR4 | hsa-miR-505-3p   |
| WDR4 | hsa-miR-4448     |
| WDR4 | hsa-miR-1323-5p  |
| WDR4 | hsa-miR-4282     |
| WDR4 | hsa-miR-221-3p   |
| WDR4 | hsa-miR-596      |
| WDR4 | hsa-miR-222-3p   |
| WDR4 | hsa-miR-140-3p.1 |
| WDR4 | hsa-miR-1908-3p  |
| WDR4 | hsa-miR-384      |
| WDR4 | hsa-miR-28-3p    |
| WDR4 | hsa-miR-4733-5p  |
| WDR4 | hsa-miR-4326     |
| WDR4 | hsa-miR-582-5p   |
| WDR4 | hsa-miR-6772-3p  |
| WDR4 | hsa-miR-9-5p     |
| WDR4 | hsa-miR-5582-3p  |
| WDR4 | hsa-miR-92-3p    |
| WDR4 | hsa-miR-5004-5p  |
| WDR4 | hsa-miR-6768-5p  |
| WDR4 | hsa-miR-3675-5p  |
| WDR4 | hsa-miR-6718-5p  |
| WDR4 | hsa-miR-4489     |
| WDR4 | hsa-miR-216a-5p  |
| WDR4 | hsa-miR-302d-5p  |
| WDR4 | hsa-miR-25-3p    |
| WDR4 | hsa-miR-7186-3p  |

|      |                 |
|------|-----------------|
| WDR4 | hsa-miR-4268    |
| WDR4 | hsa-miR-194-5p  |
| WDR4 | hsa-miR-196b-3p |
| WDR4 | hsa-miR-1323    |

---
