# Supplementary material for: Identification of m7G Methylation‐Related miRNA Signature Associated with Survival and Immune Microenvironment Regulation in Uterine Corpus Endometrial Carcinoma
Source: Hindawi journal article supplement (doi:10.1155/2022/8776678), 2022-01-01
Supplement: f3 [file 8776678.f3.pdf]

| ID         | logFC      | logCPM     | P-Value  | FDR      |
|------------|------------|------------|----------|----------|
| hsa-miR-54 | -3.2223697 | 13.2256858 | 3.96E-95 | 2.56E-92 |
| hsa-miR-45 | -2.7329807 | 9.17786596 | 1.57E-65 | 5.06E-63 |
| hsa-miR-15 | -2.0578723 | 12.2010282 | 9.19E-46 | 1.98E-43 |
| hsa-miR-13 | -3.9301519 | 7.00728354 | 4.83E-44 | 7.80E-42 |
| hsa-miR-12 | -2.5262043 | 5.85078418 | 2.23E-38 | 2.88E-36 |
| hsa-miR-29 | -2.3746602 | 7.0241048  | 1.16E-32 | 1.25E-30 |
| hsa-miR-42 | 3.00584608 | 13.7788963 | 1.85E-32 | 1.71E-30 |
| hsa-miR-21 | 2.9794948  | 15.7147489 | 4.24E-31 | 3.43E-29 |
| hsa-miR-30 | -1.1163822 | 18.8899013 | 1.44E-26 | 1.03E-24 |
| hsa-miR-54 | -2.341593  | 4.61005985 | 9.90E-26 | 6.39E-24 |
| hsa-miR-42 | 2.23048724 | 13.6235057 | 3.14E-25 | 1.84E-23 |
| hsa-miR-60 | -2.3638562 | 4.49219845 | 1.57E-24 | 8.44E-23 |
| hsa-miR-36 | -2.9168333 | 3.89876286 | 9.61E-24 | 4.78E-22 |
| hsa-miR-51 | -3.6554421 | 3.92121015 | 7.44E-22 | 3.44E-20 |
| hsa-miR-13 | 1.7584676  | 10.0717731 | 9.14E-22 | 3.94E-20 |
| hsa-miR-54 | -2.952467  | 4.29424864 | 2.02E-20 | 7.97E-19 |
| hsa-miR-66 | -2.2323913 | 4.75822679 | 2.10E-20 | 7.97E-19 |
| hsa-miR-37 | -1.7139627 | 7.85538264 | 1.77E-19 | 6.37E-18 |
| hsa-miR-37 | -2.0271443 | 8.08806189 | 4.16E-18 | 1.42E-16 |
| hsa-miR-48 | 1.31342154 | 11.8250272 | 1.94E-17 | 6.27E-16 |
| hsa-miR-54 | -1.7501347 | 4.45768576 | 2.25E-16 | 6.93E-15 |
| hsa-miR-67 | -2.4079371 | 3.91455953 | 4.33E-16 | 1.27E-14 |
| hsa-miR-63 | -1.6598565 | 4.78142592 | 1.01E-15 | 2.84E-14 |
| hsa-miR-19 | 1.41465811 | 8.2946523  | 1.10E-14 | 2.95E-13 |
| hsa-miR-94 | 2.00867368 | 7.87935755 | 2.21E-14 | 5.71E-13 |
| hsa-miR-12 | 8.31784669 | 13.2006358 | 5.41E-14 | 1.34E-12 |
| hsa-miR-12 | 1.72789166 | 9.50147231 | 1.25E-12 | 2.98E-11 |
| hsa-miR-63 | 2.91637784 | 4.7876372  | 1.38E-12 | 3.17E-11 |
| hsa-miR-59 | 2.95790092 | 8.92133847 | 2.35E-12 | 5.24E-11 |
| hsa-miR-31 | 1.89461656 | 7.03668293 | 3.22E-12 | 6.94E-11 |
| hsa-miR-38 | -2.3643845 | 6.37446756 | 2.29E-11 | 4.77E-10 |
| hsa-miR-36 | 1.30669118 | 7.70927836 | 7.66E-11 | 1.55E-09 |
| hsa-miR-13 | -1.3185131 | 12.8627073 | 2.35E-10 | 4.50E-09 |
| hsa-miR-32 | -1.8377346 | 4.43480245 | 2.37E-10 | 4.50E-09 |
| hsa-miR-87 | -2.184068  | 4.92223118 | 3.32E-10 | 5.95E-09 |
| hsa-miR-14 | -1.1719198 | 8.72215804 | 4.00E-10 | 6.98E-09 |
| hsa-miR-79 | -2.3034362 | 4.17241686 | 4.33E-10 | 7.37E-09 |
| hsa-miR-65 | 2.11850798 | 9.11694561 | 1.16E-09 | 1.87E-08 |
| hsa-miR-77 | 1.75412083 | 5.59864936 | 1.22E-09 | 1.93E-08 |
| hsa-miR-88 | -1.294648  | 8.02835047 | 2.82E-09 | 4.33E-08 |
| hsa-miR-44 | -1.817875  | 4.03529808 | 4.48E-09 | 6.74E-08 |
| hsa-miR-94 | 1.25646003 | 8.33104682 | 7.32E-09 | 1.07E-07 |
| hsa-miR-65 | -1.5407275 | 6.38181256 | 1.00E-08 | 1.44E-07 |
| hsa-miR-55 | 2.31446479 | 4.67679405 | 1.20E-08 | 1.68E-07 |
| hsa-miR-12 | 3.53580552 | 4.86793194 | 1.29E-08 | 1.78E-07 |

|            |            |            |          |            |
|------------|------------|------------|----------|------------|
| hsa-miR-21 | 2.37248271 | 8.73983445 | 1.57E-08 | 2.12E-07   |
| hsa-miR-56 | 2.13542808 | 5.01340745 | 1.96E-08 | 2.54E-07   |
| hsa-miR-12 | 2.66071826 | 4.58780225 | 1.99E-08 | 2.54E-07   |
| hsa-miR-46 | -1.6979837 | 3.84357082 | 2.00E-08 | 2.54E-07   |
| hsa-miR-76 | 1.50158579 | 6.87743852 | 3.17E-08 | 3.93E-07   |
| hsa-miR-77 | 1.21030488 | 6.62747071 | 4.60E-08 | 5.60E-07   |
| hsa-miR-36 | 1.53931605 | 6.07430108 | 5.16E-08 | 6.17E-07   |
| hsa-miR-47 | 1.31347076 | 5.38615366 | 5.81E-08 | 6.82E-07   |
| hsa-miR-50 | 2.69580425 | 4.39118784 | 6.34E-08 | 7.32E-07   |
| hsa-miR-23 | -1.8903712 | 4.70260896 | 7.54E-08 | 8.48E-07   |
| hsa-miR-68 | 2.5078802  | 4.37733899 | 7.70E-08 | 8.48E-07   |
| hsa-miR-31 | 2.30054843 | 4.54864479 | 7.75E-08 | 8.48E-07   |
| hsa-miR-88 | -1.3643152 | 8.56027423 | 1.10E-07 | 1.16E-06   |
| hsa-miR-56 | -2.036188  | 4.04656482 | 1.18E-07 | 1.22E-06   |
| hsa-miR-37 | -1.3165582 | 8.05713912 | 1.19E-07 | 1.22E-06   |
| hsa-miR-89 | 3.81163395 | 11.3803054 | 1.26E-07 | 1.27E-06   |
| hsa-miR-13 | 1.41184744 | 6.08092403 | 3.12E-07 | 3.10E-06   |
| hsa-miR-50 | -1.8527185 | 4.50064367 | 5.65E-07 | 5.53E-06   |
| hsa-miR-36 | 1.36442019 | 6.20616396 | 6.15E-07 | 5.93E-06   |
| hsa-miR-48 | 2.33371183 | 5.03841329 | 6.47E-07 | 6.14E-06   |
| hsa-miR-46 | -1.2777569 | 5.19822821 | 8.31E-07 | 7.78E-06   |
| hsa-miR-44 | 3.28361894 | 11.9102712 | 9.09E-07 | 8.32E-06   |
| hsa-miR-77 | 2.69823734 | 5.80557406 | 9.15E-07 | 8.32E-06   |
| hsa-miR-57 | 1.81853587 | 9.94612111 | 1.19E-06 | 1.07E-05   |
| hsa-miR-52 | 3.44721639 | 4.47667581 | 1.21E-06 | 1.07E-05   |
| hsa-miR-31 | -1.5291504 | 4.07416116 | 1.47E-06 | 1.26E-05   |
| hsa-miR-45 | -1.1986534 | 13.6391083 | 1.81E-06 | 1.54E-05   |
| hsa-miR-45 | 1.77925212 | 4.53953331 | 1.96E-06 | 1.64E-05   |
| hsa-miR-49 | -1.2796938 | 5.99338602 | 3.62E-06 | 3.00E-05   |
| hsa-miR-43 | 1.46765968 | 7.92389665 | 3.82E-06 | 3.12E-05   |
| hsa-miR-12 | -1.2270719 | 4.55570396 | 4.09E-06 | 3.30E-05   |
| hsa-miR-31 | 3.44510354 | 5.22616612 | 6.15E-06 | 4.90E-05   |
| hsa-miR-93 | 2.58264477 | 7.07424869 | 7.31E-06 | 5.76E-05   |
| hsa-miR-65 | -1.2591941 | 5.07519444 | 8.23E-06 | 6.40E-05   |
| hsa-miR-31 | -1.3574009 | 4.17338717 | 9.19E-06 | 7.07E-05   |
| hsa-miR-12 | 2.54659091 | 8.76447092 | 1.02E-05 | 7.77E-05   |
| hsa-miR-44 | -1.117934  | 5.88202532 | 1.28E-05 | 9.63E-05   |
| hsa-miR-12 | -1.5753583 | 5.56296582 | 1.62E-05 | 0.00012061 |
| hsa-miR-54 | -1.233083  | 6.00626479 | 2.25E-05 | 0.0001617  |
| hsa-miR-44 | 1.36632442 | 6.32081332 | 2.35E-05 | 0.00016653 |
| hsa-miR-12 | -1.8945949 | 4.44990938 | 2.52E-05 | 0.00017687 |
| hsa-miR-65 | 1.35323429 | 4.72835948 | 2.84E-05 | 0.00019717 |
| hsa-miR-12 | 2.79108522 | 4.24681412 | 3.07E-05 | 0.00021115 |
| hsa-miR-95 | 1.21503153 | 7.49661559 | 3.54E-05 | 0.00024096 |
| hsa-miR-46 | 1.9363677  | 4.09293522 | 3.72E-05 | 0.00025059 |
| hsa-miR-31 | 1.45675965 | 4.45027959 | 3.97E-05 | 0.00026472 |

|            |            |            |             |            |
|------------|------------|------------|-------------|------------|
| hsa-miR-89 | 3.5617066  | 5.28455217 | 4.15E-05    | 0.0002737  |
| hsa-miR-49 | -1.1404339 | 6.32143432 | 4.38E-05    | 0.00028578 |
| hsa-miR-46 | 1.88334722 | 4.55984179 | 5.00E-05    | 0.00032287 |
| hsa-miR-57 | 2.35811295 | 4.20524093 | 5.17E-05    | 0.00033096 |
| hsa-miR-12 | 6.11928215 | 8.07332934 | 5.69E-05    | 0.00036043 |
| hsa-miR-42 | -1.4027705 | 3.90207175 | 7.43E-05    | 0.00046617 |
| hsa-miR-45 | -1.4700842 | 4.73626138 | 7.91E-05    | 0.00048799 |
| hsa-miR-12 | -1.1965987 | 4.11076439 | 7.93E-05    | 0.00048799 |
| hsa-miR-12 | -1.4079808 | 3.85006168 | 8.97E-05    | 0.00054663 |
| hsa-miR-77 | -1.6249573 | 4.09024479 | 9.45E-05    | 0.00057024 |
| hsa-miR-44 | 2.17182481 | 4.68552271 | 0.000108598 | 0.00064958 |
| hsa-miR-52 | 2.27499056 | 4.59957367 | 0.000159126 | 0.00093451 |
| hsa-miR-36 | 1.74055652 | 4.33802089 | 0.000175833 | 0.00102332 |
| hsa-miR-12 | 1.14433438 | 7.18259209 | 0.000198014 | 0.00114212 |
| hsa-miR-31 | -1.146639  | 3.84246416 | 0.000225299 | 0.00128799 |
| hsa-miR-66 | 2.43688831 | 4.21649255 | 0.00022837  | 0.0012941  |
| hsa-miR-36 | 2.48275075 | 4.15739231 | 0.00024275  | 0.00136362 |
| hsa-miR-79 | 1.93792288 | 4.69300404 | 0.000247444 | 0.00137801 |
| hsa-miR-39 | -1.163571  | 4.70428849 | 0.000257848 | 0.00142367 |
| hsa-miR-57 | -1.1933075 | 3.93383392 | 0.000264199 | 0.00144638 |
| hsa-miR-12 | 1.07764738 | 4.67797771 | 0.000320633 | 0.00174058 |
| hsa-miR-47 | -1.3487048 | 3.92284482 | 0.000359031 | 0.00193278 |
| hsa-miR-36 | 1.57942582 | 4.98391961 | 0.000493345 | 0.00263389 |
| hsa-miR-47 | 2.01248007 | 4.23706325 | 0.00070191  | 0.00368645 |
| hsa-miR-41 | -1.0726385 | 8.59707374 | 0.00072443  | 0.00374385 |
| hsa-miR-36 | -1.1785576 | 3.86614099 | 0.000996336 | 0.0049894  |
| hsa-miR-22 | 1.489823   | 4.13965274 | 0.001029738 | 0.00509419 |
| hsa-miR-44 | 1.06662487 | 4.90989035 | 0.001033033 | 0.00509419 |
| hsa-miR-76 | 2.71112102 | 8.95479279 | 0.001043601 | 0.00510732 |
| hsa-miR-44 | 1.78507315 | 4.50432    | 0.001052151 | 0.00511045 |
| hsa-miR-37 | 1.3866074  | 18.5143287 | 0.00121529  | 0.00585879 |
| hsa-miR-94 | 1.54046784 | 4.10203427 | 0.001242238 | 0.00594434 |
| hsa-miR-31 | 1.67814688 | 4.13652824 | 0.001436906 | 0.00672639 |
| hsa-miR-39 | 3.15753771 | 4.76218429 | 0.001647958 | 0.00765885 |
| hsa-miR-54 | -1.008737  | 3.84159535 | 0.001778084 | 0.00820459 |
| hsa-miR-89 | 2.40139736 | 4.52769181 | 0.001836403 | 0.00841359 |
| hsa-miR-89 | 2.54901074 | 5.91938868 | 0.001936827 | 0.0088112  |
| hsa-miR-60 | 1.45564283 | 4.4671845  | 0.002014489 | 0.00910042 |
| hsa-miR-80 | 1.09438739 | 4.47011646 | 0.00219286  | 0.00976647 |
| hsa-miR-12 | 1.16631965 | 7.58211594 | 0.002207283 | 0.00976647 |
| hsa-miR-39 | -1.220705  | 4.02845876 | 0.002518256 | 0.01091807 |
| hsa-miR-21 | 1.93745509 | 4.90556233 | 0.002891489 | 0.01237021 |
| hsa-miR-50 | -1.0713402 | 3.85475776 | 0.002972739 | 0.01263414 |
| hsa-miR-31 | 1.24333806 | 4.17235006 | 0.003061741 | 0.01292735 |
| hsa-miR-12 | 1.66480135 | 3.98261531 | 0.003280765 | 0.01367338 |
| hsa-miR-47 | 2.02760535 | 4.9004993  | 0.003664204 | 0.01498149 |

|            |            |            |             |            |
|------------|------------|------------|-------------|------------|
| hsa-miR-56 | -1.0415613 | 3.97616295 | 0.004308213 | 0.01707427 |
| hsa-miR-54 | 2.3383022  | 4.82531178 | 0.00591352  | 0.02301285 |
| hsa-miR-31 | 1.16819634 | 3.95154425 | 0.006226615 | 0.02408619 |
| hsa-miR-58 | 1.62329305 | 4.3881095  | 0.006504396 | 0.0247167  |
| hsa-miR-44 | 1.75289029 | 4.05261176 | 0.006629998 | 0.02504666 |
| hsa-miR-45 | 1.39011593 | 4.24009806 | 0.00720973  | 0.02676716 |
| hsa-miR-88 | 1.22009401 | 9.64034639 | 0.007801186 | 0.0286339  |
| hsa-miR-46 | 1.13896133 | 4.19155329 | 0.008144875 | 0.02955949 |
| hsa-miR-39 | 1.32728339 | 4.1802428  | 0.008487197 | 0.03045961 |
| hsa-miR-19 | 1.23302408 | 4.11115584 | 0.008853324 | 0.03142443 |
| hsa-miR-37 | -1.0927573 | 5.17218918 | 0.009246511 | 0.03246329 |
| hsa-miR-39 | 1.37217469 | 3.93978019 | 0.011413794 | 0.03985573 |
| hsa-miR-31 | 1.51118899 | 6.58705055 | 0.011663673 | 0.04050932 |
| hsa-miR-59 | 2.21289037 | 5.64352323 | 0.012559406 | 0.04338704 |
| hsa-miR-18 | 1.62102319 | 10.3252103 | 0.013687439 | 0.04703237 |

---
